# Supplementary material for: SubCellBarCode: integrated workflow for robust spatial proteomics by mass spectrometry
Source: Springer Nature journal article supplement (doi:10.1038/s41596-022-00699-2), 2022-06-22
Supplement: MOESM3 [file 41596_2022_699_MOESM3_ESM20.xlsx]

## Sheet: Sheet1
HiRIEF fraction	LC gradient length HiRIEF pH 3-10 fractions	LC gradient length HiRIEF pH 3.4-4.8 fractions
fraction_01	50 min	50 min
fraction_02	50 min	50 min
fraction_03	70 min	50 min
fraction_04	70 min	50 min
fraction_05	90 min	50 min
fraction_06	90 min	50 min
fraction_07	110 min	50 min
fraction_08	110 min	50 min
fraction_09	110 min	50 min
fraction_10	110 min	50 min
fraction_11	110 min	50 min
fraction_12	90 min	50 min
fraction_13	90 min	50 min
fraction_14	90 min	50 min
fraction_15	90 min	50 min
fraction_16	70 min	50 min
fraction_17	50 min	50 min
fraction_18	50 min	50 min
fraction_19	50 min	50 min
fraction_20	accumulate in trap column	50 min
fraction_21	accumulate in trap column	50 min
fraction_22	accumulate in trap column	50 min
fraction_23	accumulate in trap column	50 min
fraction_24	accumulate in trap column	50 min
fraction_25	accumulate in trap column	50 min
fraction_26	accumulate in trap column	50 min
fraction_27	50 min	50 min
fraction_28	50 min	50 min
fraction_29	70 min	50 min
fraction_30	50 min	50 min
fraction_31	50 min	50 min
fraction_32	accumulate in trap column	50 min
fraction_33	accumulate in trap column	50 min
fraction_34	accumulate in trap column	50 min
fraction_35	accumulate in trap column	50 min
fraction_36	50 min	50 min
fraction_37	50 min	50 min
fraction_38	70 min	50 min
fraction_39	70 min	50 min
fraction_40	50 min	50 min
fraction_41	50 min	50 min
fraction_42	50 min	50 min
fraction_43	accumulate in trap column	50 min
fraction_44	accumulate in trap column	50 min
fraction_45	accumulate in trap column	50 min
fraction_46	accumulate in trap column	50 min
fraction_47	accumulate in trap column	50 min
fraction_48	accumulate in trap column	50 min
fraction_49	accumulate in trap column	50 min
fraction_50	50 min	50 min
fraction_51	70 min	50 min
fraction_52	70 min	50 min
fraction_53	accumulate in trap column	50 min
fraction_54	accumulate in trap column	50 min
fraction_55	accumulate in trap column	50 min
fraction_56	accumulate in trap column	50 min
fraction_57	accumulate in trap column	50 min
fraction_58	accumulate in trap column	50 min
fraction_59	accumulate in trap column	50 min
fraction_60	accumulate in trap column	50 min
fraction_61	accumulate in trap column	50 min
fraction_62	accumulate in trap column	50 min
fraction_63	accumulate in trap column	50 min
fraction_64	50 min	50 min
fraction_65	50 min	50 min
fraction_66	70 min	50 min
fraction_67	accumulate in trap column	50 min
fraction_68	accumulate in trap column	50 min
fraction_69	accumulate in trap column	50 min
fraction_70	accumulate in trap column	50 min
fraction_71	50 min	50 min
fraction_72	50 min	50 min
