# Supplementary material for: SubCellBarCode: integrated workflow for robust spatial proteomics by mass spectrometry
Source: Springer Nature journal article supplement (doi:10.1038/s41596-022-00699-2), 2022-06-22
Supplement: MOESM4 [file 41596_2022_699_MOESM4_ESM21.xlsx]

## Sheet: HiRIEF 3-10-3.4-4.8 
Protein	FS1.A.set01_tmt10plex_126	FS1.B.set01_tmt10plex_127N	FS2.A.set01_tmt10plex_127C	FS2.B.set01_tmt10plex_128N	FP1.A.set01_tmt10plex_128C	FP1.B.set01_tmt10plex_129N	FP2.A.set01_tmt10plex_129C	FP2.B.set01_tmt10plex_130N	FP3.A.set01_tmt10plex_130C	FP3.B.set01_tmt10plex_131	Min PSMs for quant
A2M	0.0987324	-0.0492542	0.495282	0.621712	-0.260692	-0.336975	0.0535253	0.0876897	-0.0339402	-0.0423365	98
A4GALT	-0.720805	-0.741122	-1.25571	-1.12055	0.178919	-0.0323343	0.657094	0.707669	0.364757	0.501459	6
AAAS	-0.716524	-1.11308	-1.13769	-0.856251	0.481242	0.451927	0.328312	0.396456	0.00977082	0.0373027	35
AACS	3.07587	2.97224	1.27395	1.08124	-0.108849	-0.207968	-0.137691	-0.225015	-0.384853	-0.389381	33
AADAT	-0.825486	-0.65743	-0.0812092	0.12131	0.133722	0.0349003	0.172845	0.152541	-0.955004	-0.728978	8
AAED1	0.0346494	0.0300438	-0.336991	-0.334944	-0.11125	-0.0908007	0.591874	0.748426	-0.0166335	0.0779967	2
AAGAB	2.10769	1.95	0.360676	0.430163	-0.364507	-0.257201	-0.0259915	-0.16849	-0.324614	-0.310992	5
AAK1	1.63169	1.61267	0.299699	0.3659	-0.314441	-0.42595	-0.0582022	-0.0392826	-0.372289	-0.221705	35
AAMDC	2.78788	2.63162	0.361657	0.817944	-0.151749	-0.143122	-0.107763	-0.0308658	-0.272841	-0.061016	4
AAMP	2.01132	1.57469	1.21785	1.08614	-0.115977	-0.115707	-0.102892	-0.0434943	-0.387973	-0.374322	20
AAR2	0.38173	0.332709	0.481005	0.450161	-0.423981	-0.31304	-0.484176	-0.296962	0.215976	0.164412	32
AARS	3.25598	3.10727	0.911819	0.899644	-0.231486	-0.256113	-0.150537	-0.0680855	-0.434259	-0.336029	224
AARS2	-0.766841	-0.748279	-0.187361	-0.0544805	0.206805	0.179545	0.424214	0.451155	-0.588521	-0.478993	64
AARSD1	2.9214	2.85716	1.67378	1.71253	-0.00774862	-0.0795679	-0.329678	-0.279023	-0.585809	-0.693655	4
AASDH	0.301295	0.280933	0.883914	0.936225	-0.288065	-0.260012	0.00819286	0.0508519	0.0273727	-0.393582	5
AASDHPPT	1.39781	1.30732	0.986148	0.853069	-0.390237	-0.44664	-0.0960504	-0.0143916	-0.408286	-0.326619	26
AASS	-1.09228	-0.956288	0.135289	0.408073	0.109431	0.0848939	0.15304	0.058229	-1.05914	-0.910627	67
AATF	-0.422315	-0.447492	-0.631271	-0.71947	1.20855	1.16392	0.0983589	-0.0472783	0.0923386	-0.0194995	52
ABCA1	-0.445267	-0.376661	-1.22909	-1.34702	0.15127	-0.0465079	0.527451	0.681449	0.433221	0.607868	11
ABCA2	-0.363028	-0.322239	-0.721094	-0.691373	0.0253606	0.0299257	0.589355	0.742981	0.664077	0.667919	72
ABCA3	-0.941955	-0.335224	-1.01014	-1.1706	-0.00167798	0.0877724	1.29061	1.39315	1.42455	1.6119	12
ABCA5	-0.235913	-0.383164	-0.473811	-0.564354	-0.0160975	0.00933748	0.325402	0.332338	0.931125	0.714087	10
ABCA7	-0.485104	-0.217278	-0.729416	-0.722051	0.14278	0.0159908	0.467967	0.649651	0.222817	0.394631	15
ABCB1	-0.771628	-0.655497	-1.06833	-0.944087	0.0755403	0.0417124	0.756668	0.87101	0.429955	0.53772	71
ABCB10	-0.809937	-0.838186	-1.14697	-1.02987	0.623003	0.477256	1.07342	1.10112	-0.079911	0.077861	37
ABCB11	0.426927	0.560217	-0.94209	-0.853969	-0.35127	-0.283358	0.318726	0.464647	0.0710533	0.309598	2
ABCB6	-0.0359703	-0.0439104	-0.56233	-0.511311	-0.0836029	0.00581929	0.763829	0.860916	1.0036	0.897533	85
ABCB7	-0.613672	-0.655664	-0.999204	-0.888274	0.552039	0.391819	0.902065	0.924382	-0.0422278	0.0710702	46
ABCB8	-0.514571	-0.444507	-0.71725	-0.676521	0.50608	0.444597	0.87092	0.853755	-0.0910376	0.0548907	22
ABCC1	-1.09439	-0.961359	-1.32069	-1.26092	0.0813437	0.0409872	0.75825	0.883408	0.354688	0.445198	183
ABCC10	-0.894335	-0.580091	-1.00192	-0.755338	-0.0516134	0.0912101	0.878499	0.95968	1.09666	1.07581	8
ABCC3	-0.72787	-0.581206	-1.13909	-1.22571	0.0571918	0.0433402	0.772733	0.849213	0.570569	0.562781	56
ABCC4	-0.987338	-0.940118	-1.2663	-1.06396	0.0687145	0.0497992	0.719167	0.847527	0.337463	0.345751	78
ABCC5	-1.01012	-1.05329	-1.10285	-1.11861	0.110785	0.0100076	0.779067	0.820559	0.394184	0.509029	21
ABCD1	-0.561975	-0.463819	-1.11416	-0.971077	0.0651086	0.0679101	0.513821	0.631155	0.215449	0.276855	72
ABCD3	-0.962463	-0.873252	-1.12167	-1.09762	0.0605444	0.0536875	0.655107	0.708433	0.303059	0.309897	104
ABCD4	0.329746	0.262368	-0.913202	-0.940353	0.187791	-0.0412062	0.326853	0.510466	0.325354	0.279571	5
ABCE1	1.69397	1.60388	0.436882	0.363527	-0.430225	-0.449392	-0.0684978	-0.015197	-0.273104	-0.30801	129
ABCF1	1.23654	1.1737	0.495936	0.320046	-0.603464	-0.603398	-0.188673	-0.278912	0.130175	-0.0705944	157
ABCF2	0.465543	0.51988	0.820355	0.732855	-0.394413	-0.440464	-0.0401657	-0.0826069	0.00844811	-0.171617	113
ABCF3	2.38409	2.17959	0.336157	0.142296	-0.305752	-0.377281	-0.0290471	-0.10358	-0.45485	-0.429185	49
ABCG1	-0.411326	-0.205246	-1.13319	-1.32634	0.0659409	-0.104919	0.544083	0.71965	0.366987	0.375015	18
ABHD10	-1.52147	-1.15174	-0.0811419	0.128816	0.181633	0.145321	0.261924	0.149827	-0.986271	-0.731681	37
ABHD11	-0.588683	-0.749352	-0.176277	0.097426	0.343555	0.226301	0.424312	0.331731	-0.566204	-0.430225	13
ABHD12	-1.09321	-0.995307	-1.1925	-1.33359	0.176376	0.120478	0.4607	0.561962	0.124699	0.153089	17
ABHD13	-0.25833	0.0373611	-1.03076	-0.954501	0.0366235	0.000245734	0.885259	0.979498	0.464461	0.487174	8
ABHD14B	2.78064	2.38273	0.946884	1.07438	-0.167964	-0.348964	-0.266776	-0.141887	-0.162294	-0.261372	13
ABHD15	-0.479896	-0.297895	-0.824487	-0.877991	0.128073	0.0677209	0.452033	0.538205	0.203779	0.286523	11
ABHD16A	-0.377971	-0.121972	-0.691563	-0.979506	0.0972047	0.126741	0.415873	0.491284	0.0107769	0.134591	36
ABHD17A	0.0477085	-0.0964767	-0.501424	-0.678011	-0.0405891	0.0739172	0.681659	0.91744	1.24785	1.24515	6
ABHD17B	-0.149987	0.0169816	-0.608954	-0.513945	-0.107982	-0.169459	0.625149	0.735887	0.919085	0.924346	12
ABHD17C	-0.344259	-0.0904463	-0.826785	-0.565781	0.0050384	0.022629	0.992066	1.2406	1.18238	1.26842	3
ABHD18	0.0499439	-0.229093	-0.44754	-0.34236	0.555375	0.497769	0.568208	0.765497	-0.21818	0.0425416	9
ABHD2	-0.501399	-0.489926	-0.605816	-0.817179	0.123134	0.131666	0.0941994	0.431792	0.141679	0.0337933	1
ABHD3	-1.00315	-1.86046	-2.07025	-2.13303	0.11306	0.216021	0.685757	0.72747	-0.0141636	0.105077	3
ABHD4	0.943383	0.777887	0.16684	0.247293	-0.250481	-0.0696379	-0.0153329	-0.0769987	-0.362107	-0.234638	1
ABHD5	0.234891	0.318136	-0.17	-0.435027	-0.0438628	-0.250995	0.216245	0.195066	0.0578774	0.213436	6
ABHD6	-1.06266	-1.08189	-1.6353	-1.40819	0.0635929	0.130722	0.542483	0.601702	0.100442	0.179977	20
ABI1	0.660115	0.609576	-0.313942	-0.242442	-0.657445	-0.727848	-0.112884	-0.0255642	0.662367	0.590047	25
ABI2	0.519097	0.188273	-0.245013	-0.169787	-0.623632	-0.674797	-0.0297628	0.237389	0.483679	0.369499	11
ABL1	1.41509	1.24924	0.396099	0.247909	-0.54298	-0.487647	-0.0611788	-0.0307086	-0.218829	-0.261469	38
ABL2	1.55865	1.34622	0.276901	0.161114	-0.127433	-0.304002	-0.01143	-0.0433132	-0.339716	-0.320583	10
ABLIM1	-0.519059	-0.520133	-0.177669	-0.11717	0.720281	0.715468	0.39732	0.28887	-0.615828	-0.622779	70
ABLIM2	0.437353	0.404454	1.04441	1.09747	0.00102189	0.122941	-0.142982	-0.0602531	-0.711575	-0.589442	10
ABR	1.82291	1.62583	0.328319	0.192814	-0.423395	-0.440366	0.0109294	-0.0816966	-0.145402	-0.159003	47
ABRACL	2.89644	2.71023	0.848938	0.744635	-0.257941	-0.0238768	-0.0424079	-0.152912	-0.152021	-0.259993	6
ABRAXAS1	-1.16122	-1.08123	-0.0983172	-0.0967436	0.122817	0.198124	-0.326051	-0.40277	0.855315	0.730069	14
ABRAXAS2	2.37124	2.33348	1.11274	1.03636	-0.413168	-0.340825	-0.0812885	-0.106631	-0.167954	-0.358435	29
ABT1	-0.216251	-0.293644	-0.365099	-0.404398	0.961192	0.932538	0.0942094	-0.0458488	0.0481912	-0.0475844	16
ABTB1	0.946686	1.01664	0.309496	0.0548196	-0.394416	-0.412767	0.0108445	-0.0682401	-0.269068	-0.284261	14
ABTB2	1.94155	1.91774	0.346872	0.177452	-0.396607	-0.396815	-0.0293507	-0.0857846	-0.114413	-0.234255	16
ACAA1	-0.688435	-0.792257	-0.128464	0.110292	-0.00738787	-0.0112755	0.216749	0.274228	0.0366561	0.0637772	56
ACAA2	-1.28909	-1.19576	0.151795	0.361287	0.129706	0.108817	0.0647597	0.0163255	-1.40797	-1.26272	114
ACACA	1.84846	1.71337	0.0898548	-0.0118153	-0.386459	-0.444669	-0.0292685	-0.0380706	-0.0984248	-0.210191	238
ACACB	1.97671	1.98438	0.060386	-0.0893161	-0.317182	-0.601607	-0.0614486	-0.106782	0.00467293	-0.309141	5
ACAD10	-0.316667	-0.299481	-0.188923	-0.0561628	0.161547	0.135348	0.420515	0.488985	-0.433749	-0.305261	33
ACAD11	-0.573844	-0.607665	-0.65851	-0.497016	0.109188	0.0658775	0.41351	0.465858	0.428364	0.345668	25
ACAD8	-1.38056	-1.18066	0.0161979	0.260946	0.105935	0.102466	0.129361	0.0634934	-1.23182	-1.15028	25
ACAD9	-0.968194	-0.917649	-0.24194	-0.0600231	0.431716	0.398484	0.69397	0.669521	-0.524003	-0.425483	123
ACADL	-1.30444	-1.23461	-0.148861	0.152634	0.112134	0.103053	0.0984883	0.00885638	-1.39076	-1.22358	9
ACADM	-1.3391	-1.35174	0.255378	0.436069	0.107695	0.0692484	0.179794	0.104669	-1.19366	-1.06851	72
ACADS	-0.499185	-0.697704	0.100435	0.255484	0.0695064	0.0820932	0.166612	0.0455264	-1.1847	-0.986793	20
ACADSB	-1.17939	-1.26762	0.137048	0.394585	0.127484	0.083335	0.201316	0.0800342	-1.14154	-1.20485	31
ACADVL	-0.773627	-0.763242	-0.209057	-0.0575284	0.281599	0.225258	0.342057	0.322878	-0.791289	-0.58314	195
ACAP2	2.57688	2.47345	0.313585	0.182412	-0.588711	-0.541715	-0.055731	-0.0734942	-0.269815	-0.372454	48
ACAP3	1.7194	1.55327	0.0168224	-0.155677	-0.499281	-0.535236	0.0760408	-0.000900894	-0.186946	-0.0370105	14
ACAT1	-1.14806	-1.16825	0.0820092	0.367491	0.167127	0.0850803	0.108418	0.0817625	-1.26107	-1.11195	122
ACAT2	2.23464	2.15168	1.31459	1.31616	-0.0334018	-0.0266753	-0.182702	-0.169013	-0.385217	-0.353491	43
ACBD3	0.288265	0.279088	0.668903	0.598489	-0.30779	-0.310686	0.11603	0.174127	-0.136117	-0.132801	52
ACBD4	-1.11366	-1.88727	-1.37205	-1.3532	0.106481	0.30068	0.161467	-0.0230418	0.192088	0.0444049	3
ACBD5	-0.848614	-0.85879	-1.01679	-0.986389	0.0676671	0.0613281	0.697525	0.839851	0.36779	0.406662	42
ACBD6	1.52527	1.44891	0.72858	1.06594	-0.0778786	-0.225685	-0.0497169	-0.118418	-0.458703	-0.333848	9
ACBD7	3.41002	3.55519	0.579516	0.560772	-0.217721	-0.0160531	0.0442642	-0.136596	-0.423909	-0.347785	1
ACCS	0.305273	0.314253	0.301609	0.494269	-0.489934	-0.130593	-0.114136	0.0556022	0.051525	-0.000534217	1
ACD	-0.000215192	-0.151869	0.554235	0.243652	0.639065	0.427568	-0.0279403	-0.188457	-0.132475	-0.56822	3
ACIN1	-0.72229	-0.616485	-0.213449	-0.138391	1.43216	1.50495	0.386936	0.262636	-0.457259	-0.314652	160
ACKR3	-1.93301	-2.04478	-1.48271	-1.58497	0.0940198	-0.00944273	0.82253	1.06255	1.05725	0.9333	7
ACLY	2.16648	2.02953	1.05215	1.04205	-0.344515	-0.332823	-0.28806	-0.204496	-0.0538011	-0.0287403	519
ACO1	2.25491	2.08373	1.40136	1.33493	-0.103649	-0.0835713	-0.195877	-0.20206	-0.361252	-0.296724	99
ACO2	-0.886322	-0.883928	0.188482	0.388695	0.135506	0.103751	0.129566	0.0660976	-1.36104	-1.17726	280
ACOT1	1.42233	0.868127	0.559074	0.257173	0.10414	0.0424445	-0.808176	-0.77674	-1.35189	-1.16362	1
ACOT11	1.70542	1.38849	0.555961	0.58602	-0.353318	-0.282957	-0.0432229	-0.0491088	-0.407752	-0.342223	8
ACOT13	-2.23311	-2.41629	-0.026141	0.393552	0.0867878	0.158939	-0.0648996	0.0913964	-1.9555	-1.85689	11
ACOT2	-0.45459	-0.244184	0.0410597	0.245633	0.142111	0.0621444	-0.00830663	-0.0876408	-0.563166	-0.670411	4
ACOT4	-0.12059	-0.0144846	0.20373	0.144942	0.0394417	-0.082826	0.221973	0.137743	3.75454e-05	-0.0363731	7
ACOT7	1.70538	1.64615	1.43881	1.34715	-0.191791	-0.243024	-0.181015	-0.0378971	-0.423275	-0.36932	42
ACOT8	-0.595504	-0.698739	-0.191084	0.0514673	-0.117346	-0.0431653	0.263008	0.270287	0.036257	0.0759342	19
ACOT9	-0.675854	-0.683895	-0.199861	-0.0280549	0.278561	0.215769	0.348329	0.364825	-0.659996	-0.487131	73
ACOX1	-0.731619	-0.662388	-0.112391	0.149958	-0.067579	-0.130961	0.215197	0.214255	0.0750324	0.0185779	66
ACOX3	-0.927399	-1.0452	-0.292316	-0.10988	-0.0202982	-0.043299	0.277378	0.267807	0.224774	0.295686	42
ACP1	1.93832	1.9733	0.528509	0.579185	-0.0142943	0.0175434	-0.164507	-0.136482	-0.473324	-0.421432	30
ACP2	-0.454817	-0.309617	-0.23614	-0.141065	-0.241197	-0.199778	0.592349	0.690448	0.813905	0.695456	28
ACP6	-1.31269	-1.5362	1.04374	1.03859	0.400393	0.348102	-0.0908601	-0.0353859	-1.44673	-1.15266	10
ACSF2	-1.13116	-1.25319	-0.051051	0.146857	0.0999034	0.0466812	0.0941318	0.0461619	-1.35399	-1.29902	13
ACSF3	-1.20948	-1.05621	-0.0158887	0.249409	0.231902	0.139238	0.253888	0.212825	-0.89018	-0.800015	18
ACSL1	-0.67601	-0.6961	-0.333323	-0.439591	-3.76686e-05	0.0390213	0.539866	0.630797	0.252881	0.276305	54
ACSL3	-1.28125	-1.18604	-1.40419	-1.27023	0.0890858	0.0776929	0.580101	0.677732	0.227058	0.315144	123
ACSL4	-1.12646	-0.887377	-0.509929	-0.491772	0.0499402	0.0412352	0.644398	0.63389	0.300539	0.323191	102
ACSL5	-0.943141	-1.13089	-1.50763	-1.23721	0.113455	-0.0914269	0.47891	0.531967	0.424743	0.423268	5
ACSS1	1.24392	-0.432604	0.240024	0.634547	0.154045	-0.0326869	-0.578039	0.559083	-0.933112	-0.241724	2
ACSS2	2.44471	2.30305	1.93653	1.61438	0.00051314	-0.0704337	-0.174236	-0.296755	-0.513447	-0.611802	14
ACTA1	-0.0643555	0.112139	-0.120356	-0.0711113	-0.12872	-0.200907	0.491782	0.406564	-0.021785	0.260234	3
ACTB	-0.592076	-0.40216	0.268261	0.749076	-0.372213	-0.209463	-0.21213	0.15513	0.100896	0.311846	6
ACTBL2	0.393923	0.826188	0.325079	0.641516	-0.335324	-0.19543	-0.0308841	-0.105473	-0.0389016	0.00589787	11
ACTG1	-0.232647	-0.28572	0.331402	0.63344	-0.208949	-0.0418607	-0.0582508	0.173427	-0.0669418	0.154287	5
ACTL6A	0.0168967	-0.0194907	0.223273	0.223791	0.783776	0.774574	-0.266731	-0.379053	-0.0280745	-0.0365804	70
ACTN1	0.37202	0.407199	0.918021	0.99131	0.0513514	0.065537	-0.137053	-0.0501235	-0.560614	-0.489605	344
ACTN2	0.0740127	-0.599143	-0.124288	-0.612718	0.891317	0.0076677	0.815497	0.298659	0.375287	-0.187383	1
ACTN4	0.238036	0.224838	0.976935	1.05906	0.143369	0.11055	-0.0933174	-0.0331623	-0.575254	-0.526029	1077
ACTR10	1.68869	1.64215	0.422206	0.227896	-0.675549	-0.649447	-0.393445	-0.267407	0.132906	0.0160629	26
ACTR1A	1.36109	1.24101	0.145144	0.0146001	-0.376982	-0.457671	-0.317147	-0.257127	0.11726	-0.0447605	50
ACTR1B	1.42334	1.32991	0.218445	0.0288794	-0.619955	-0.511831	-0.30109	-0.1653	0.071968	-0.123622	25
ACTR2	1.34737	1.27018	0.167581	0.248051	-0.346097	-0.304243	-0.0709941	-0.034575	-0.178253	-0.0516708	105
ACTR3	0.999823	0.88829	0.207755	0.264833	-0.295308	-0.286524	-0.0815338	-0.0243414	-0.0865492	-0.113722	146
ACTR3B	0.979781	0.623815	0.0599664	0.450151	-0.532191	-0.15026	-0.0792563	-0.105423	-0.1101	-0.100057	5
ACTR5	-0.0956244	0.129808	0.439744	0.611019	0.333572	0.380345	-0.366501	-0.278936	-0.0651663	-0.119533	26
ACTR6	0.0357584	0.190382	0.32963	0.289613	0.638379	0.581672	-0.0817861	-0.103135	-0.284571	-0.349329	13
ACTR8	-0.530406	-0.46031	0.458916	0.4877	0.377248	0.299265	-0.235613	-0.216128	0.0850725	0.0108744	24
ACVR1	-0.769986	-0.902058	-1.28312	-1.16878	0.0222917	0.028587	0.835994	0.955741	0.756253	0.946304	10
ACVR1B	-0.230579	-0.291559	-0.265244	1.10159	0.0152723	0.171877	-0.0561418	-0.0247464	0.0610437	0.153397	4
ACVR2B	-0.0856608	-0.455477	-0.996854	-0.497977	0.0280266	0.253614	0.542599	0.542304	0.122602	0.367781	2
ACYP1	3.31678	3.4396	0.764731	0.816654	-0.171234	-0.0819313	-0.219545	-0.261628	-0.14524	-0.508565	11
ACYP2	2.6608	2.55544	0.459398	0.473456	-0.134792	-0.122213	-0.0795363	-0.0524519	-0.463078	-0.514424	8
ADA	2.30719	2.08791	1.63446	1.23125	-0.00574328	0.00253126	-0.167752	-0.460133	-0.256564	-0.713687	32
ADAL	3.03847	2.87644	1.82834	1.70437	-0.0254107	-0.0302709	-0.187774	-0.166022	-0.349062	-0.136986	17
ADAM10	-1.06759	-0.784404	-1.14485	-1.10632	0.105728	0.0413227	0.562179	0.699579	0.39908	0.430061	69
ADAM12	-1.25879	-0.684012	-1.13529	-1.04303	0.189856	0.0626862	0.435499	0.465995	0.149805	0.137212	8
ADAM15	-0.462377	-0.44889	-0.671069	-0.887008	0.0629294	0.0934608	0.545841	0.684609	0.408652	0.37806	22
ADAM17	-0.701014	-0.478312	-0.974224	-0.972343	0.0777951	0.0215231	0.473933	0.584403	0.176346	0.277804	40
ADAM19	-0.433494	-0.480584	-1.21286	-1.02443	0.290066	-0.143481	0.422061	0.608326	0.915574	0.850083	1
ADAM22	-0.0624511	-0.109868	-1.03538	-0.694561	0.0491955	-0.0124668	0.728136	0.810312	0.850313	0.728999	15
ADAM9	-1.89283	-1.73093	-1.93008	-1.83621	0.0583576	0.076417	0.857529	1.05333	1.17474	1.1507	41
ADAMTS1	-0.626757	-0.710837	-0.424197	-0.386946	-0.0210618	-0.183776	0.653716	0.453477	0.812195	0.630198	47
ADAMTS15	-0.473874	-0.573634	-0.330091	-0.287176	-0.0768186	-0.294778	0.61924	0.368391	0.545795	0.724822	2
ADAMTS8	-0.719048	-0.874113	0.117529	0.191354	-0.0768141	-0.0564579	0.343879	0.241547	0.0883879	0.151395	2
ADAMTSL3	0.319659	0.393277	-0.0286692	-0.327431	-0.18632	-0.345086	-0.0347883	-0.214667	0.186414	0.195173	1
ADAR	-0.564357	-0.54751	-0.877552	-0.879946	1.01021	1.04234	0.129162	-0.0446216	0.130501	0.0482939	163
ADARB1	-0.650311	-0.515587	-0.651656	-0.763672	0.611193	0.631294	0.0166844	-0.119477	0.723426	0.385057	23
ADAT1	0.388212	0.375306	1.36147	1.27852	-0.153577	-0.193833	-0.0242962	0.0386118	-0.174347	-0.18364	12
ADAT2	1.01488	0.779736	2.14041	2.17737	-0.0957007	-0.122305	-0.286542	-0.118444	-0.436947	-0.447977	3
ADAT3	1.39191	1.41615	1.5684	1.69784	0.0146624	-0.104057	-0.0887148	-0.0692995	-0.545461	-0.542204	5
ADCK1	-0.503561	-0.4458	-1.00687	-0.886002	0.580778	0.453469	0.851362	1.03761	-0.0484372	0.081427	16
ADCK5	-0.0719024	-0.0984788	-0.953039	-1.24453	0.643628	0.494558	1.28183	1.24626	-0.1674	0.218228	4
ADCY3	-0.743653	-0.744596	-1.4483	-1.21391	0.0333969	0.0873465	0.840313	0.913063	0.448285	0.485346	36
ADCY4	0.291585	0.32794	0.115121	0.162004	-0.828698	-0.948675	-0.478419	-0.421468	0.872682	0.694712	1
ADCY5	1.2694	1.02193	1.01365	0.995803	0.259637	-0.113053	-0.862141	-1.34653	-0.301611	-0.719832	3
ADCY6	-0.474443	-0.411939	-1.13261	-0.797905	0.04428	0.055479	0.582416	0.705543	0.342168	0.397527	24
ADCY7	-0.793866	-0.791572	-0.825435	-0.974698	0.089159	0.0450221	0.631117	0.904794	0.365155	0.374426	14
ADCY9	-1.01905	-1.15862	-1.59031	-1.59259	0.0463879	0.069262	0.882556	0.996176	0.515463	0.679745	49
ADD1	0.27173	0.330867	0.594581	0.575377	0.0622414	0.101014	-0.073488	-0.0393408	-0.324021	-0.283783	63
ADD3	0.0125167	-0.00725524	0.484258	0.450949	0.137518	0.176698	-0.0814953	-0.0412603	-0.162329	-0.212566	90
ADGRA3	-1.06958	-1.68865	-1.12894	-1.11615	0.130072	0.0165129	0.51417	0.715298	0.230466	0.342545	15
ADGRB1	-0.053638	-0.102325	0.0674074	0.147016	-0.217374	-0.14941	-0.0420423	-0.0160431	0.0156926	0.0969661	1
ADGRB2	-1.38387	-1.89933	-1.35482	-1.53376	0.126001	0.0205834	0.445767	0.687885	0.203895	0.314415	3
ADGRD1	-1.31131	-1.50563	-0.490095	-0.298569	0.0799723	0.00857995	0.851398	1.01987	0.713906	0.704869	4
ADGRE2	-1.22706	-0.919268	-1.27772	-1.27857	-0.0219249	0.187797	0.611927	0.742949	0.298405	0.326392	5
ADGRE5	-0.448251	-0.318329	-0.725757	-0.616344	-0.0142329	-0.0136326	0.553191	0.73199	0.472456	0.519398	89
ADGRF1	0.975653	1.0769	-0.127868	0.0471715	-1.20121	-1.05316	-0.65396	-0.580647	0.0339122	0.0534329	1
ADGRF5	0.28222	0.111465	0.926583	0.814521	0.099526	0.150326	0.00502047	-0.663284	-0.390068	-0.353906	1
ADGRG1	-0.285448	-0.227893	-0.679685	-0.586366	0.0420806	-0.0373038	0.633973	0.849436	0.498773	0.427013	23
ADGRG2	-0.13095	-0.173571	-0.243625	-0.225017	0.0156914	-0.162923	0.301397	0.544991	0.315621	0.2555	11
ADGRG6	-0.820879	-0.964876	-0.783406	-0.698017	0.142092	-0.02888	0.825577	0.805785	0.700729	0.737336	10
ADGRL1	0.326837	0.367448	-1.23792	-0.716186	-0.0822183	-0.610898	-0.0419658	0.390071	0.188765	0.401498	1
ADGRL2	-0.280008	-0.500509	-0.947949	-0.881935	0.0417041	-5.89857e-05	0.641369	0.761533	0.493764	0.66659	44
ADH5	2.26649	2.18134	1.41557	1.33208	-0.0633694	-0.0211667	-0.201799	-0.247474	-0.403637	-0.364117	84
ADI1	1.88461	1.7726	1.51246	1.54529	0.00375164	-0.111676	-0.214403	-0.201725	-0.334695	-0.46512	13
ADIPOR1	-0.703384	-0.242958	-1.18159	-1.11372	0.100012	0.0277246	0.869727	0.907878	0.640934	0.757974	8
ADIPOR2	-1.03637	-0.881375	-1.44176	-1.72024	0.0598256	0.125137	0.575846	0.612122	0.110285	0.0976048	5
ADIRF	1.29044	1.56585	-1.16776	-1.34246	-1.1374	-0.551171	0.115166	0.534313	-0.0229249	0.11027	1
ADK	2.20442	2.27523	2.21709	2.06033	0.0344588	-0.0811493	-0.29002	-0.281933	-0.728308	-0.544946	83
ADNP	-0.780522	-0.758842	0.648873	0.620731	0.961311	1.11498	-0.0513506	-0.143616	-0.15707	-0.261164	86
ADNP2	-0.410583	-0.506306	0.0191219	-0.00631525	0.785252	0.844333	0.0316014	-0.170812	-0.256169	-0.218166	13
ADO	1.14745	0.636331	1.05464	1.09096	0.0272689	-0.0142965	-0.0675752	-0.0808152	-0.52853	-0.533954	19
ADPGK	-0.262632	-0.375996	-0.648221	-0.706852	0.10025	0.0578404	0.373783	0.391384	0.0842177	0.0884491	25
ADPRH	1.53107	1.42862	1.14301	0.975663	-0.29955	-0.347373	-0.30097	-0.134882	-0.377452	-0.237135	2
ADPRHL2	0.907721	0.828926	0.68581	0.729696	-0.0440162	-0.0819229	-0.0407954	-0.0515362	-0.648233	-0.512591	43
ADRA2A	-0.611612	-0.682494	-0.823968	-0.299456	0.0457845	0.0684196	0.298323	0.489998	0.0842511	0.311226	11
ADRB2	-0.412336	0.0611468	-0.136256	0.187293	-0.463162	-0.592404	-0.0636555	0.296979	0.0373058	0.436099	1
ADRM1	0.641295	0.5793	-0.0671618	-0.111403	-0.550134	-0.512596	-0.538445	-0.537449	0.526196	0.569872	34
ADSL	2.66886	2.47397	1.35253	1.44759	-0.0927068	-0.0977892	-0.202034	-0.172326	-0.294011	-0.192991	64
ADSS	2.56252	2.36722	1.61254	1.59385	-0.0775215	-0.105531	-0.16478	-0.114731	-0.432303	-0.385398	78
ADSSL1	1.30889	1.14595	1.82115	1.37252	0.00375577	-0.0942618	-0.268619	-0.197379	-0.465699	-0.46019	25
AEBP1	2.80767	2.84062	0.770316	0.918719	-0.0810381	0.0167631	-0.0414963	-0.141434	-0.669168	-0.338083	2
AEBP2	-0.349089	-0.304672	0.964853	0.971806	0.0702114	0.0768521	-0.370551	-0.249589	0.236981	0.101069	16
AES	0.240771	0.102757	0.421943	0.473128	-0.0266452	-0.16713	0.0590835	0.0875471	-0.125109	0.0843383	9
AFAP1	-1.44316	-1.28703	0.0551968	0.102614	0.0123966	0.0028111	0.161328	0.364423	-0.0181996	0.0295479	28
AFAP1L1	0.743012	0.932273	-0.179748	-0.147092	-0.14993	-0.116868	0.300959	0.04424	0.0350821	0.0522629	3
AFAP1L2	2.23573	2.09218	0.680451	0.732735	-0.276666	-0.368316	0.142744	-0.288942	-0.453311	-0.599964	2
AFDN	-0.0244672	-0.140123	-0.0674867	-0.120484	-0.375119	-0.422707	0.0502391	0.169254	0.166597	0.126447	72
AFF1	-0.84923	-0.921886	0.527069	0.600988	0.152747	0.159114	-0.151417	-0.166449	0.0445184	0.0282581	29
AFF4	-0.963757	-0.88932	0.895946	0.900769	0.294035	0.474459	-0.284909	-0.175785	0.0706524	0.00268524	41
AFG1L	-1.12484	-1.13173	-0.225894	-0.114653	0.275129	0.257374	0.435035	0.487904	-0.738411	-0.62005	15
AFG3L2	-1.17744	-1.10448	-1.3771	-1.24422	0.497352	0.487855	1.0696	1.11864	-0.0351666	0.103993	104
AFP	3.47459	3.61925	0.645383	0.753246	0.0489901	0.0576279	-0.24439	-0.307832	-0.421251	-0.270217	8
AFTPH	1.01109	0.982376	0.747137	0.690921	-0.549032	-0.634184	-0.169169	-0.177791	0.0840984	-0.118144	19
AGA	-0.902834	-1.0293	0.292892	0.421746	-0.0419704	-0.146763	0.366974	0.375245	0.0440539	0.0367259	12
AGAP1	0.252072	0.311743	1.05166	0.849823	-0.462413	-0.24515	-0.229863	-0.0192843	0.0193784	0.213108	5
AGAP3	0.375991	0.251501	0.734898	0.75251	-0.252427	-0.247484	-0.0335487	0.0367793	-0.0215591	0.0113596	23
AGER	-0.0850133	-0.0157374	0.305117	0.354531	0.288307	0.234297	-0.105656	0.0133245	-0.269433	-0.563481	1
AGFG1	0.714327	0.850756	0.517629	0.40995	-0.401245	-0.495895	-0.058473	-0.0694576	-0.549816	-0.577546	20
AGFG2	1.8897	1.63343	0.453639	0.415825	-0.264117	-0.32524	-0.0778924	-0.234463	-0.519182	-0.747963	4
AGGF1	0.500232	0.615461	1.48222	1.3317	-0.482138	-0.476224	-0.255122	-0.0654766	0.0427061	-0.544912	1
AGK	-0.807474	-0.80095	-1.1497	-1.12582	0.605123	0.583127	1.15177	1.1597	-0.0125783	0.105754	44
AGL	1.03881	0.923151	-0.189267	-0.130957	-0.923405	-0.988783	-0.528785	-0.587538	1.27594	0.825337	141
AGMAT	-0.601367	-0.783641	-0.228503	-0.102339	0.365187	0.359375	0.465857	0.538968	-0.393538	-0.305286	14
AGO1	0.1478	0.207786	0.336052	0.392745	-0.27238	-0.168422	-0.147367	-0.100262	0.30153	0.295219	30
AGO2	-0.140494	-0.206676	0.399781	0.281661	-0.235435	-0.290736	-0.132522	-0.0545372	0.737764	0.646576	52
AGO3	-0.188866	-0.227137	-0.0528957	-0.0357287	-0.267063	-0.326633	-0.0869712	-0.0286872	0.813132	0.682108	37
AGO4	-1.26997	-0.935198	-0.220864	-0.109978	-0.0481087	0.00234862	0.171643	0.0556243	0.461168	0.382114	1
AGPAT1	-0.985312	-0.660883	-1.08187	-1.0718	0.15915	0.162133	0.271751	0.436156	0.0311158	0.118423	14
AGPAT2	-1.67555	-1.74957	-1.87711	-1.70606	0.164622	0.104841	0.340424	0.455309	0.0570916	0.115006	12
AGPAT3	-1.11095	-1.17544	-1.3918	-1.07935	0.182008	0.0679503	0.367739	0.499811	0.16764	0.130478	14
AGPAT4	-1.4462	-0.916068	-1.35096	-1.58873	0.179201	0.0622469	0.432226	0.472615	0.167173	0.16432	13
AGPAT5	-0.730517	-0.64779	-1.19363	-1.33289	0.356816	0.370361	0.854365	0.928842	-0.0120496	0.0861842	20
AGPS	-0.631202	-0.45874	-0.86547	-0.708621	0.0731577	0.0438735	0.504499	0.654421	0.284409	0.322666	138
AGR2	-0.251552	-0.521847	0.21889	0.31555	0.12895	0.00989166	0.311883	0.636993	-0.452184	-0.513179	3
AGRN	-0.961871	-0.753265	-0.245831	-0.111921	-0.206427	-0.257242	0.249913	0.336921	0.439035	0.480421	122
AGTPBP1	1.70898	1.56755	0.115553	0.111383	-0.405701	-0.240466	-0.0667585	-0.0639142	-0.0683103	0.00839168	14
AGTRAP	0.205149	-0.0072061	-0.401602	-0.689728	-0.426426	-0.196374	0.382761	0.698667	1.16173	0.91549	12
AHCTF1	-0.612018	-0.569286	-0.796739	-0.744704	1.53544	1.52709	0.621243	0.415016	0.023655	-0.00565689	160
AHCY	2.4203	2.32626	1.34455	1.35954	-0.0595044	-0.0505314	-0.30706	-0.212526	-0.388545	-0.314981	204
AHCYL1	2.18478	2.04371	0.577031	0.452049	-0.408134	-0.381635	-0.045089	-0.0506948	-0.414616	-0.354024	38
AHCYL2	1.50395	1.29766	0.692702	0.599934	-0.0489399	-0.186216	-0.113421	-0.0367041	-0.260512	-0.14047	12
AHDC1	-0.950768	-0.830194	-0.862647	-0.72076	0.728611	0.782339	-0.041687	-0.123571	0.653779	0.335538	23
AHI1	0.934893	0.960095	0.471962	0.365941	-0.313504	-0.164391	-0.0391502	-0.0297578	-0.16983	-0.221794	24
AHNAK	-0.0532193	0.0800083	1.52457	1.62817	0.0559274	0.0789819	-0.0323931	0.0259457	-0.302197	-0.251706	2612
AHNAK2	0.260194	0.275133	1.4754	1.50394	-0.0550972	-0.0964574	0.00447603	0.09124	-0.259989	-0.202154	561
AHRR	-1.18414	-0.842854	-0.514161	0.0229883	0.723224	0.876317	0.129886	0.153835	-0.134144	-0.147034	2
AHSA1	1.94114	1.86032	0.411357	0.321358	-0.410329	-0.437051	-0.0428412	-0.0320467	-0.235001	-0.434257	90
AHSG	3.50335	3.61101	0.48186	0.871278	-0.288356	-0.341126	-0.142492	-0.0492835	-0.668236	-0.400472	57
AIDA	0.102861	0.212139	0.171563	0.198471	-0.547951	-0.498249	-0.0968335	0.0362693	0.290814	0.317875	45
AIF1	0.4095	0.494771	-0.049512	-0.389379	-0.759662	0.317888	-0.0346014	-0.777897	0.988125	-0.632616	8
AIF1L	1.32161	1.30753	0.222849	0.27438	-0.0328246	-0.331272	-0.0698062	-0.0062425	-0.693666	-0.667753	4
AIFM1	-0.566649	-0.660547	-0.293885	-0.153311	0.714516	0.716517	0.975259	1.02002	-0.217928	-0.121961	154
AIFM2	0.304697	0.206407	-0.316011	-0.399776	-0.291503	-0.395357	0.29873	0.444668	0.36696	0.226933	29
AIG1	-1.11506	-1.22852	-1.3315	-1.95889	0.125394	0.0211903	0.326124	0.477898	0.318672	0.302724	2
AIMP1	0.393287	0.399997	-0.0576135	-0.125469	-0.710933	-0.673851	-0.319854	-0.157203	0.644916	0.505737	102
AIMP2	0.308772	0.211786	-0.213632	-0.257947	-0.483666	-0.383242	-0.0132909	-0.0188175	1.10764	0.804034	40
AIP	1.87243	1.71538	0.616735	0.58967	-0.29283	-0.355433	-0.065902	-0.0416459	-0.444802	-0.437402	48
AJUBA	1.18235	1.23888	0.739505	0.779008	-0.0687111	-0.160341	-0.0862538	-0.0213636	-0.479957	-0.349844	21
AK1	2.53421	2.4525	1.40794	1.29112	-0.0584715	-0.0685842	-0.187672	-0.142079	-0.443748	-0.520659	93
AK2	-0.795454	-0.747119	0.585373	0.624289	0.185661	0.259082	-0.0539532	0.0387674	-1.19744	-1.12768	181
AK3	-1.4328	-1.3645	-0.193296	-0.0112084	0.187945	0.160676	0.335007	0.328495	-0.95558	-0.889325	111
AK4	-0.260377	-0.0731118	-0.220819	-0.0652113	0.187513	0.172786	0.26034	0.225091	-0.617429	-0.48198	28
AK6	1.78164	2.05786	1.04791	0.891582	-0.113758	-0.361819	0.00410033	-0.131321	-0.459297	-0.320556	16
AKAP1	-1.087	-0.955873	-0.935071	-0.977404	0.212792	0.222813	0.758473	0.863783	-0.00975148	0.0974341	71
AKAP10	1.71024	1.70067	0.488155	0.171036	-0.467299	-0.440953	-0.0371781	-0.0998024	-0.250198	-0.436506	29
AKAP11	0.728192	0.604037	-0.28549	-0.413956	-0.466777	-0.620007	-0.0868862	0.0494666	0.146309	0.0278725	16
AKAP12	0.801473	0.797079	0.575425	0.478752	-0.692831	-0.750454	-0.0962674	-0.062275	-0.0460751	-0.100179	246
AKAP13	0.937511	0.907447	0.124349	-0.0394933	-0.705023	-0.74075	-0.0558132	-0.0776336	0.0672522	-0.0564646	166
AKAP17A	-0.896274	-0.862207	-0.457778	-0.321144	0.995383	1.05894	0.0859264	-0.0240183	0.0695774	0.00494198	42
AKAP5	-0.79253	-0.78485	-0.848772	-0.855528	0.124818	-0.034385	0.85777	0.999047	0.525566	0.609993	16
AKAP7	-0.482801	-0.454544	0.00812502	0.0653236	0.0248821	0.0733952	-0.0528294	-0.0343173	0.186479	0.1918	8
AKAP8	-0.936975	-0.778892	0.0932063	0.0467518	0.837673	0.906227	-0.102753	-0.222042	0.0256403	-0.0919335	43
AKAP8L	-1.17856	-1.06348	0.426726	0.444952	-0.00765472	0.0411646	-0.120278	-0.0491364	0.270119	0.239765	63
AKAP9	0.298705	0.305988	-0.142156	-0.251369	-0.536863	-0.569781	-0.0125895	0.0123455	0.424993	0.309928	368
AKIP1	-0.293183	-0.781671	-0.197959	-0.284866	0.282388	0.268723	0.369788	0.275751	-0.109131	-0.0746793	4
AKIRIN1	0.00699423	0.0779104	0.747513	0.714174	-0.0568748	-0.121971	-0.158419	-0.0194232	0.366343	0.281673	2
AKIRIN2	0.300932	0.210771	0.584252	0.569513	-0.469505	-0.362803	-0.326901	-0.0712996	0.398619	0.182723	4
AKR1A1	1.9492	1.91349	1.11914	1.02715	-0.0621409	-0.0743011	-0.222457	-0.165656	-0.499642	-0.42759	76
AKR1B1	2.01071	1.9225	1.14447	1.07366	-0.0811443	-0.0777922	-0.306009	-0.174471	-0.543812	-0.35939	48
AKR1B10	3.78831	3.62409	2.19291	1.98369	0.183338	-0.169098	-0.184428	-0.35265	-0.88845	-0.587658	1
AKR1C1	2.11612	2.28596	1.47685	1.55307	0.147185	-0.0329594	-0.148276	-0.17353	-0.433423	-0.138416	1
AKR1C2	2.12416	2.14897	1.62695	1.33549	-0.119317	-0.180468	-0.213449	-0.215025	-0.577563	-0.523511	14
AKR1C3	2.42078	2.29674	1.51358	1.34538	-0.0443393	-0.059688	-0.261897	-0.240885	-0.577731	-0.374012	149
AKR7A2	0.889846	0.716526	0.470543	0.5619	-0.0463303	-0.23465	-0.152116	-0.0697562	-0.59215	-0.426896	15
AKT1	1.55395	1.60569	0.210738	0.118989	-0.34888	-0.449255	-0.0420581	-0.0604336	-0.300143	-0.353604	16
AKT1S1	1.57766	1.33699	0.165341	0.353718	-0.319491	-0.25701	-0.257561	-0.35627	-0.280249	-0.089732	13
AKT2	1.73683	1.63832	0.278526	0.129304	-0.543699	-0.607805	0.0443809	-0.110726	-0.310102	-0.426022	31
AKTIP	1.53815	1.63973	0.557441	0.331486	-0.297929	-0.114351	-0.106438	-0.196142	-0.191898	-0.272843	5
ALAD	1.85417	1.84909	0.791433	1.06503	-0.424162	-0.221068	-0.390455	-0.350181	-0.0138194	-0.12924	13
ALAS1	-0.763499	-0.535607	0.135302	0.267376	0.100388	0.0237776	0.357588	0.123188	-0.89772	-0.871426	4
ALB	2.88629	3.04761	0.557247	0.403659	-0.0968976	-0.151855	-0.270293	-0.201375	-0.201905	-0.117552	108
ALCAM	-0.930059	-1.11399	-1.19666	-1.23656	0.0706516	0.0487892	0.747895	0.946102	0.464217	0.49122	88
ALDH16A1	0.993645	0.915994	-0.159819	-0.173402	-0.864626	-0.671094	-0.410831	-0.280689	0.488764	0.456188	30
ALDH18A1	-0.906066	-0.962643	-0.17855	-0.0678705	0.285494	0.292634	0.434222	0.494194	-0.68918	-0.470191	183
ALDH1A1	-0.376216	0.0625565	-1.84267	-1.34619	0.817304	0.726734	0.714985	0.579081	-0.195462	-0.116398	2
ALDH1A2	2.88056	3.02494	0.874252	0.844513	0.0191544	-0.210036	-0.166852	-0.231835	-0.464119	-0.611008	5
ALDH1A3	2.43918	2.22116	0.636821	0.812955	-0.114758	-0.148088	-0.0897558	-0.0311322	-0.337701	-0.429448	16
ALDH1B1	-1.25083	-1.2921	-0.114484	0.187393	0.191791	0.147974	0.11294	0.0250007	-1.25338	-1.06414	153
ALDH1L2	-0.859979	-0.611874	0.00629787	0.119473	0.0524445	0.09414	0.195379	0.212508	-1.04777	-0.911291	36
ALDH2	-1.06023	-1.08786	0.0870168	0.360569	0.117507	0.0903474	0.0856777	0.0747288	-1.18912	-1.10122	67
ALDH3A1	1.99854	1.95388	1.07332	0.963253	-0.02924	-0.137579	-0.223012	-0.123025	-0.51168	-0.386408	61
ALDH3A2	-0.920794	-1.00914	-1.50083	-1.47768	0.0915305	0.0772856	0.553248	0.663077	0.1618	0.223069	112
ALDH3B1	-0.401726	-0.478687	-0.616741	-0.791616	-0.00887827	0.0225732	0.707672	0.57734	0.543626	0.562665	29
ALDH4A1	-1.43528	-1.50566	0.00255366	0.315114	0.151697	0.107293	0.108021	0.0565669	-1.18335	-1.02834	27
ALDH5A1	-1.1557	-1.07268	-0.0423184	0.250786	0.173415	0.0962882	0.17147	0.0428951	-1.31161	-0.99157	26
ALDH6A1	-1.0867	-0.995015	0.105202	0.304078	0.112189	0.120189	0.104043	0.0514231	-1.162	-0.762765	45
ALDH7A1	0.579209	0.393644	0.338345	0.519047	0.0519523	-0.0149701	-0.039489	-0.077732	-1.22881	-1.13934	77
ALDH9A1	0.634963	0.592049	0.306861	0.355355	0.0286749	0.0448467	-0.0134287	-0.0134584	-1.00448	-0.921058	101
ALDOC	2.53115	2.45562	1.00768	0.984451	-0.171591	-0.217844	-0.242749	-0.175366	-0.244685	-0.27574	57
ALG1	-0.906765	-0.771177	-0.54492	-0.465098	0.0349693	0.135333	0.27726	0.484094	0.139001	0.123282	15
ALG11	-0.627666	-0.6213	-1.166	-1.29756	0.109277	0.0373079	0.446204	0.499986	0.0921023	0.211393	11
ALG12	-1.68698	-1.24148	-1.19121	-1.47523	0.114418	0.142358	0.46023	0.486957	0.0181066	0.204286	4
ALG13	0.505129	0.392972	-1.01228	-1.0743	0.167763	0.119391	0.0383604	0.102661	-0.263658	-0.272095	12
ALG14	-0.716153	-0.793493	-1.09355	-0.93505	0.604495	0.58201	0.44983	0.473437	-0.0935232	0.0406174	9
ALG2	-0.27878	-0.399363	-0.837676	-0.798724	0.0684251	0.0839083	0.410965	0.545052	0.132141	0.170697	33
ALG3	-2.37704	-2.09693	-1.55023	-1.59534	0.322988	0.275756	0.633365	0.609061	-0.042267	0.129612	4
ALG5	-0.991813	-0.943821	-1.32106	-1.25589	0.132355	0.0954115	0.446908	0.534265	0.0920404	0.123718	42
ALG6	-0.78558	-0.216847	-0.946618	-0.85625	0.0636015	0.0934852	0.461899	0.529872	0.0117699	0.182226	7
ALG8	-0.399575	-0.556741	-0.842735	-1.01676	0.0988717	0.00580606	0.309262	0.511433	0.0936227	0.34703	8
ALKBH1	-1.05551	-0.626469	0.108907	0.203227	0.190797	0.102567	0.253138	0.0989899	-0.769172	-1.08781	5
ALKBH2	-0.434252	-0.281834	0.87834	0.812733	-0.0563161	0.0178989	-0.0727934	-0.0393873	1.50551	1.54293	15
ALKBH3	2.12521	1.72403	0.565729	0.505537	-0.848156	-0.478623	-0.135726	0.0304473	-0.20239	-0.413038	3
ALKBH4	1.31883	1.20381	0.421327	0.806953	-0.187985	-0.572016	-0.0891028	-0.0789506	-0.412684	-0.354411	5
ALKBH5	-0.59654	-0.419633	1.21908	1.36131	0.353605	0.437952	-0.406266	-0.38623	0.0617647	0.00720777	25
ALKBH6	2.42212	2.33537	0.808681	0.694026	-0.114675	-0.115939	-0.0718992	-0.160138	-0.389287	-0.44505	7
ALKBH7	-1.25945	-1.18267	-0.323984	0.0545336	0.419435	0.446311	0.600542	0.704433	-0.796172	-0.643543	4
ALKBH8	2.6654	2.53264	0.81221	0.958645	-0.0362595	-0.0511794	-0.240882	-0.269545	-0.213564	-0.369858	4
ALMS1	0.437037	0.371436	0.0743971	-0.0130611	-0.0400489	-0.115348	0.0717462	0.0856193	-0.0697742	-0.0344096	20
ALPI	-0.282969	-0.0868895	-0.568307	-0.439028	-0.0183168	0.130816	0.80402	0.90961	0.687522	0.626444	6
ALPL	-0.656811	-0.773258	-1.01702	-0.854733	0.0582354	-0.000203768	0.877235	1.06459	0.995365	1.03445	106
ALPP	-0.473772	-0.139137	-0.627327	-0.425007	0.179317	-0.0589403	0.792577	0.800533	0.638042	0.807469	2
ALS2	1.91753	1.94015	0.165134	0.0888641	-0.348326	-0.305519	-0.0153238	-0.0464312	-0.210074	-0.33893	18
ALS2CL	0.970171	0.982006	-0.0440549	-0.218565	-0.32982	-0.294482	0.164117	-0.00446118	0.0472821	-0.148229	4
ALX1	-0.540474	-0.434029	0.256992	0.0865872	-0.0865171	0.100243	0.0356652	0.220512	-0.123235	-0.157954	2
ALYREF	-0.892328	-0.926712	-0.951795	-1.03948	0.653454	0.664545	-0.0177122	-0.0539121	0.39358	0.251941	136
AMACR	-0.625837	-0.411415	-0.104321	0.101021	0.0477702	-0.0194453	0.320621	0.351236	0.0270188	0.0178164	28
AMBRA1	-0.14235	-0.0239186	1.07512	1.18427	-0.105617	-0.0787344	-0.160276	-0.019612	0.218049	0.125444	21
AMD1	1.75703	2.00229	1.54186	1.98745	-0.0502469	0.0435523	-0.330456	-0.174283	-0.0798119	-0.225814	3
AMDHD2	3.22525	3.12465	1.34576	1.34662	-0.293327	-0.52556	-0.0767785	-0.150618	-0.128926	-0.102479	5
AMER1	-0.427241	-0.579211	-0.194532	-0.137779	-0.267587	-0.554361	0.20094	0.339056	0.524417	0.412363	4
AMFR	-0.576859	-0.500985	-1.14178	-1.23611	0.064792	0.0521544	0.440217	0.575455	0.265586	0.403849	17
AMIGO1	-1.01827	-0.843979	-1.07249	-0.727555	-0.010475	0.15706	0.719948	0.805044	0.471544	0.674167	1
AMIGO2	-0.348847	-0.57715	-0.8535	-0.601747	0.0712746	0.0456433	0.869404	1.05147	0.79992	0.829526	7
AMMECR1	1.29734	1.3283	1.00761	0.956219	-0.1319	0.0976472	-0.305627	-0.0423036	-0.540313	-0.435857	3
AMMECR1L	0.240433	0.371898	1.62203	1.53767	-0.00635024	0.0740472	-0.0945715	-0.156365	0.0447216	-0.120789	6
AMN1	2.06686	1.82188	0.701902	0.459678	-0.301904	-0.570109	-0.140325	0.0479932	-0.325738	-0.337622	1
AMOTL1	-0.724523	-0.639614	-0.279228	-0.103707	0.143011	0.114662	0.470176	0.505988	-0.0431928	0.0393268	15
AMOTL2	0.633063	0.441857	0.483339	0.56852	-0.188552	-0.258892	0.0715387	-0.16387	-0.559915	-0.617977	7
AMPD1	0.409242	0.0355493	-0.292756	-0.463292	1.17199	1.14919	0.359701	0.167111	-0.112293	-0.229094	1
AMPD2	2.69689	2.61275	1.05086	1.04649	-0.222119	-0.214991	-0.182859	-0.217327	-0.222102	-0.179466	56
AMZ2	1.47076	1.40992	0.605538	0.430638	-0.233646	-0.144091	-0.139855	-0.0488231	-0.204439	-0.24317	3
ANAPC1	0.281938	0.24589	-0.0460576	-0.124788	0.0256075	0.0757655	-0.24531	-0.335504	0.672925	0.604435	93
ANAPC10	0.0676572	-0.0521346	0.0955784	0.0429475	0.0497695	0.112793	-0.654307	-0.654589	0.662739	0.492673	12
ANAPC11	0.404546	0.645416	-0.106273	-0.307346	-0.235221	-0.0518642	-0.258323	-0.397556	1.05194	0.868868	4
ANAPC13	0.281729	0.170166	-0.204003	-0.296586	-0.034573	0.263353	-0.0108934	-0.274575	0.980466	0.75009	4
ANAPC15	-0.327231	-0.332222	-0.247391	-0.682435	0.396673	-0.0758519	-0.0169047	0.202129	0.351173	0.324858	1
ANAPC16	0.336212	0.351966	0.0272674	0.101254	-0.0836068	0.0285467	-0.60541	-0.796887	0.602349	0.564979	6
ANAPC2	0.276127	0.14111	0.0428987	-0.101978	-0.00305927	0.052231	-0.177349	-0.275062	0.71934	0.460277	57
ANAPC4	0.225536	0.109223	0.0152552	-0.0548327	0.0398323	0.0357658	-0.453711	-0.445681	0.747003	0.513182	43
ANAPC5	0.28135	0.281997	-0.0121504	-0.154703	-0.0346221	0.00123784	-0.360515	-0.39181	0.577146	0.525842	52
ANAPC7	0.0770545	-0.0211447	0.0312156	-0.0231292	0.0201378	0.0343142	-0.132408	-0.145391	0.648144	0.442689	68
ANGEL1	-0.234648	-0.318183	-0.680242	-0.71077	-0.0507219	-0.0937233	0.409995	0.24393	0.19844	0.329512	9
ANGEL2	0.0307329	0.0408567	0.839178	0.841061	0.0932596	0.10086	-0.212194	-0.153706	0.0286608	0.0398782	10
ANGPT1	-0.323994	-0.15489	-0.20168	0.0691439	-0.209425	-0.326882	0.305451	0.186892	0.128833	0.0693323	4
ANK1	-0.0592605	-0.20086	0.0276906	0.00717705	0.211238	0.174727	0.0373082	0.398992	-0.396115	-0.432603	2
ANK3	-0.420482	-0.334654	0.417533	0.398272	0.0330078	0.118733	0.205233	0.296336	-0.328281	-0.260981	36
ANKFY1	1.34318	1.436	1.19206	1.03938	-0.341552	-0.386228	-0.0443939	-0.0679371	-0.348641	-0.366633	101
ANKH	-0.20063	-0.433532	-0.922005	-0.846846	0.0453812	0.00997458	0.766251	0.805342	0.868022	0.891813	14
ANKHD1	0.87478	1.00621	0.789487	0.782395	-0.392102	-0.516485	-0.185996	-0.106418	0.00802363	-0.0864357	6
ANKIB1	0.269309	0.208956	-0.242726	-0.176424	-0.286891	-0.29814	0.352977	0.267282	0.102613	0.12137	29
ANKLE2	-0.0746312	-0.14592	-0.890837	-0.818085	0.0420437	0.0684064	0.429896	0.570059	0.162065	0.22169	88
ANKMY2	2.1291	1.90823	0.333668	0.19206	-0.422845	-0.472357	-0.0432629	-0.0199048	-0.337614	-0.403376	24
ANKRA2	-0.237654	-0.901961	0.17741	-0.0130238	0.635971	0.400277	0.0978447	-0.145854	-0.53844	-0.040833	1
ANKRD10	0.527778	0.640772	1.01359	1.09162	-0.058617	-0.289549	0.0161753	-0.108507	-0.501996	-0.344329	13
ANKRD11	-0.918156	-0.919058	0.103814	0.126228	1.07545	1.04796	-0.128138	-0.272936	0.0127642	-0.0864514	50
ANKRD12	-1.04447	-0.457757	0.468086	0.64815	0.770908	0.556593	-0.396484	-0.503634	0.0116445	0.0757005	5
ANKRD13A	1.0762	1.11841	-0.0675688	-0.110668	-0.491239	-0.553895	0.0219344	0.0123916	-0.035331	-0.017958	22
ANKRD13B	1.01782	0.848577	-0.178768	-0.42558	-0.760575	-0.690087	-0.428037	-0.128278	0.233742	0.714519	2
ANKRD13C	0.641103	0.505839	-0.16588	-0.299477	-0.537469	-0.611023	-0.0186445	0.230201	0.0440693	-0.133845	4
ANKRD13D	1.23096	1.07121	0.0946873	-0.132714	-0.368131	-0.208847	-0.139407	0.10009	-0.528646	-0.212509	2
ANKRD16	1.44661	1.45312	0.451435	0.441526	-0.235051	-0.3859	-0.401762	-0.207508	-0.116354	-0.0312038	2
ANKRD17	0.252843	0.299502	0.386115	0.247759	-0.620167	-0.621564	-0.319525	-0.380279	0.732758	0.502699	71
ANKRD26	0.349465	0.271353	0.416109	0.316959	-0.235651	-0.0421041	0.0193901	0.0855963	-0.366545	-0.271802	23
ANKRD27	0.0697022	0.108534	-0.202102	-0.128741	-0.249818	-0.169953	0.261139	0.34583	0.448968	0.651301	26
ANKRD28	1.13326	1.26347	0.0193098	-0.112521	-0.358112	-0.481088	0.0537819	-0.0030627	0.0746123	0.032925	28
ANKRD30B	-0.057142	0.402296	0.336974	1.32466	-0.0740499	-0.0158767	-0.491404	-0.457183	1.6861	1.88356	1
ANKRD39	2.51891	2.59133	1.21034	1.02551	-0.390499	-0.210267	-0.146714	0.0198191	-0.468204	-0.201975	4
ANKRD40	1.03461	0.857265	0.961576	0.817739	-0.632773	-0.444559	-0.180946	-0.0380231	0.0152527	-0.0443308	7
ANKRD44	1.79762	1.5881	0.0636819	-0.0479518	-0.629817	-0.560473	-0.0256981	-0.0683265	-0.0120769	-0.047088	28
ANKRD46	-1.90031	-1.32162	-1.89074	-1.8555	0.0802946	0.06629	0.791082	0.726856	0.428744	0.589404	3
ANKRD49	3.50756	3.13993	1.21406	1.28124	-0.110924	-0.209313	-0.146722	-0.157988	-0.407072	-0.49347	6
ANKRD50	0.765968	0.654698	0.391393	0.484718	-0.525338	-0.420258	-0.142539	-0.0416598	-0.0224957	-0.0014011	34
ANKRD52	1.61146	1.64358	0.288004	0.179564	-0.339537	-0.40586	-0.0275776	-0.0494416	-0.156183	-0.115022	19
ANKRD54	0.591758	0.482369	1.08305	1.18092	-0.107372	-0.0263509	0.00643412	-0.03246	-0.497694	-0.51988	9
ANKRD9	2.06486	1.75935	1.30606	1.32213	-0.544086	-0.389739	-0.297732	-0.124389	-0.473851	0.0583298	2
ANKS1A	2.29485	2.09558	0.046789	0.0787713	-0.422825	-0.485354	-0.0386068	-0.0537248	-0.378387	-0.41496	33
ANKS1B	2.25561	1.76934	0.967013	0.850132	-0.428152	-0.69341	-0.0945616	-0.152008	-0.519191	-0.684841	3
ANKS3	1.43876	1.31366	0.315	0.126181	-0.0314865	-0.342352	0.029475	-0.0853707	-0.534582	-0.360804	3
ANKS6	1.65047	1.46331	0.244725	0.184002	-0.0717522	-0.240643	0.0200691	-0.112401	-0.28035	-0.302745	1
ANKZF1	0.397059	0.402778	0.27416	0.278248	-0.605984	-0.734486	-0.518978	-0.423155	0.330734	0.113687	37
ANLN	0.262496	0.23922	1.51242	1.53255	-0.0608732	-0.0684869	0.0497636	0.142745	-0.320944	-0.288398	73
ANO10	-1.22224	-1.33117	-1.80051	-1.65207	0.108563	0.108905	0.489003	0.558848	0.120303	0.164605	37
ANO6	-0.245176	-0.206939	-0.733336	-0.752228	0.0646487	-0.0254078	0.70696	0.674514	0.649721	0.558997	44
ANO8	-1.24649	-1.08976	-0.758733	-0.545435	0.0753108	0.124097	0.431625	0.474278	0.122423	0.0772028	4
ANOS1	0.148763	0.0635742	-0.601984	-0.599108	-0.0833208	-0.134868	0.134201	0.323748	1.78408	1.56414	17
ANP32A	0.492963	0.642667	2.32515	2.25216	0.125573	0.0471383	-0.296444	-0.309061	-0.768379	-0.849489	152
ANP32B	0.496515	0.71356	2.30233	2.37537	0.114036	0.0601329	-0.321935	-0.28909	-0.740221	-0.690065	77
ANP32E	0.657496	0.789452	1.86956	1.86869	0.0559683	0.0393098	-0.293294	-0.297378	-0.546282	-0.569554	66
ANPEP	-0.127198	0.0522384	-0.789683	-0.629712	0.0750137	-0.0304216	0.569989	0.729139	0.705026	0.552235	31
ANTXR1	-0.843051	-0.924321	-0.924417	-0.761788	0.0563753	0.0391949	0.67055	0.856627	0.562329	0.691864	32
ANTXR2	-0.603298	-0.817816	-1.46586	-1.3675	0.0423756	0.104209	0.862554	1.00513	0.80331	0.850717	2
ANXA1	2.28199	2.3637	1.40788	1.34387	-0.0992792	-0.0626467	-0.162616	-0.145828	-0.474259	-0.542533	371
ANXA10	2.93311	2.72107	1.14175	0.966269	-0.121976	-0.332405	-0.0711139	-0.0683569	-0.481044	-0.321074	21
ANXA11	1.53419	1.35525	0.676546	0.656685	-0.241958	-0.275008	-0.0390277	-0.10302	-0.268547	-0.329292	108
ANXA2	1.616	1.52843	1.19074	1.28596	-0.152453	-0.135638	-0.150798	-0.107698	-0.0989063	-0.141841	1058
ANXA3	2.66171	2.57932	1.6242	1.54948	-0.0244756	-0.0787896	-0.277587	-0.319712	-0.418038	-0.354029	244
ANXA4	2.20406	2.15	1.56828	1.4759	-0.035378	-0.0600499	-0.215886	-0.336519	-0.216518	-0.367398	134
ANXA5	2.91409	2.86338	1.73458	1.64903	-0.0541844	-0.0889929	-0.320095	-0.306523	-0.384368	-0.361194	324
ANXA6	2.73741	2.60745	1.02135	1.05865	-0.249438	-0.107268	-0.240526	-0.220165	-0.153953	-0.269022	293
ANXA7	1.86381	1.73601	0.189177	-0.0145028	-0.367069	-0.50653	0.036378	-0.0372914	-0.24787	-0.378389	56
ANXA8	3.05785	2.859	1.89048	1.73169	-0.0967678	-0.342728	-0.345426	0.0992564	-0.218187	-0.653142	2
ANXA8L1	3.44749	3.37719	2.33056	2.22559	0.22569	-0.0791052	-0.524118	-0.446707	-0.541071	-0.496183	1
ANXA9	-0.176397	-0.0714775	0.821297	0.521991	0.0822496	0.064335	-0.475652	-0.479225	0.731973	0.634015	1
AOC1	0.120005	-0.00823973	0.966926	1.02459	-0.181762	-0.277526	0.00980663	0.0559485	-0.261959	-0.158333	2
AOX1	0.406837	0.348102	-0.332521	-0.378712	0.085741	0.0608436	0.330806	0.280525	-0.459057	-0.433267	1
AP1AR	-0.55903	-0.711087	-0.490062	-0.358651	-0.299589	0.0202141	0.308502	0.426005	1.44811	1.44593	12
AP1B1	0.498477	0.412811	-0.176579	-0.233253	-0.495241	-0.514313	-0.0357514	-0.0264672	0.401059	0.199422	127
AP1G1	0.351432	0.451992	-0.210554	-0.284281	-0.510013	-0.630339	-0.00804652	-0.0476391	0.611454	0.350122	93
AP1G2	0.941716	0.752331	-0.129512	-0.0831637	-0.512926	-0.600255	-0.0521528	-0.0637172	0.0630409	-0.00426915	22
AP1M1	0.4357	0.351608	-0.198323	-0.298663	-0.441872	-0.502288	-0.0291753	-0.0570427	0.485659	0.254751	49
AP1S1	0.732196	0.847562	-0.262285	-0.25282	-0.441709	-0.570328	-0.101925	-0.0356513	0.309519	0.19727	8
AP1S2	0.757021	0.820692	-0.13449	-0.160349	-0.833744	-0.950544	-0.191308	-0.087878	0.22098	0.153948	9
AP1S3	0.415522	0.431714	-0.204064	-0.255715	-0.866787	-0.662025	-0.0938956	0.019713	0.703459	0.446617	9
AP2A1	-0.41782	-0.448453	-0.515114	-0.526993	0.0348635	0.0429526	0.649756	0.792558	0.209727	0.394497	158
AP2A2	-0.582301	-0.512423	-0.418216	-0.506292	0.0182665	0.0153232	0.538601	0.681289	0.183118	0.311527	81
AP2B1	-0.170128	-0.276902	-0.416441	-0.479138	0.0122732	0.0429027	0.580609	0.670443	0.320985	0.390469	175
AP2M1	-0.947041	-1.02958	-0.570895	-0.554893	0.0585985	0.0380294	0.630582	0.736822	0.295138	0.457097	75
AP2S1	-0.207554	-0.0335418	-0.365319	-0.328885	-0.0202491	0.0461605	0.525617	0.583681	0.153906	0.258745	33
AP3B1	1.20487	1.13908	0.269181	0.112978	-0.644489	-0.680327	-0.0815915	-0.0539696	-0.0179618	-0.12386	69
AP3B2	2.37029	2.76411	1.49354	1.63656	0.197373	-0.484044	-0.198464	-0.223294	-0.456223	-0.516144	1
AP3D1	1.13935	1.08655	0.263429	0.235176	-0.597354	-0.559288	-0.0704793	-0.069382	-0.000716549	-0.0677059	100
AP3M1	0.930843	0.818105	0.0866733	-0.00531544	-0.517702	-0.560162	-0.0307988	-0.0149905	-0.00418076	-0.0982259	37
AP3M2	0.939465	0.688506	0.235576	-0.125907	-0.481584	-0.291978	-0.0365507	-0.0594641	0.0968019	0.0106059	3
AP3S1	0.639079	0.481732	-0.0907376	0.061539	-0.304501	-0.377834	-0.0442661	0.0876959	-0.0188009	-0.0464059	14
AP3S2	1.12873	0.768858	0.135064	0.269329	-0.512831	-0.427262	-0.138849	0.0465171	-0.120947	-0.174999	1
AP4B1	0.735606	0.699146	-0.303117	-0.492691	-0.500332	-0.555635	0.0389709	0.145958	0.112731	0.0879029	17
AP4E1	1.12764	0.967029	-0.220034	-0.367931	-0.558792	-0.571121	-0.00318188	-0.0731298	0.112228	0.0402554	31
AP4M1	1.20587	0.949788	-0.183494	-0.273939	-0.616517	-0.620629	-0.0286669	0.00331318	0.105783	0.0214674	21
AP4S1	1.52409	1.43626	-0.185473	-0.0795123	-0.708212	-0.662487	-0.0932487	-0.0856451	0.245552	0.0761413	6
AP5B1	0.313948	0.287047	-0.096303	-0.0910279	-0.622455	-0.803172	-0.0538	0.0372426	0.224658	0.155782	19
AP5M1	0.277946	0.248474	0.0705184	-0.0678547	-0.712217	-0.787397	-0.0514058	-0.00615096	0.284645	0.351504	13
AP5S1	0.28043	0.142712	-0.177912	-0.196084	-0.443404	-0.16707	0.267096	0.139734	0.524333	0.581663	5
AP5Z1	0.389241	0.359009	-0.127498	-0.0687659	-0.667214	-0.556388	-0.00404769	0.0354778	0.0643681	0.156307	19
APAF1	2.1508	1.99792	0.944985	0.86758	-0.123502	-0.11495	-0.0923739	-0.177447	-0.164211	-0.270543	18
APBA3	-0.446094	-0.299832	0.175796	0.237326	-0.299164	0.0189329	0.149291	0.416565	-0.0858352	0.104074	3
APBB1	0.480823	0.39314	0.104029	0.140735	-0.291211	-0.530298	-0.00467392	0.10236	-0.205714	-0.25227	15
APBB1IP	2.68672	2.4115	0.392286	0.502447	-0.0950227	-0.174565	-0.0926446	0.000312991	-0.0259896	-0.113453	3
APBB2	-0.888732	-1.03524	0.288801	0.250314	0.00734374	0.0447871	0.341499	0.460635	-0.0309498	0.0570644	20
APC	-0.135805	-0.0822955	0.172827	0.170616	-0.409021	-0.369092	-0.0445545	0.108484	0.148937	0.178315	47
APEH	2.40566	2.23524	0.653113	0.758203	-0.473674	-0.374168	-0.20981	-0.183723	-0.0651852	-0.0371068	86
APEX1	0.219377	0.281051	1.82403	1.83418	0.0663423	0.0940002	-0.205253	-0.158944	-0.0738883	-0.141685	179
APEX2	-0.244935	-0.418319	0.785614	0.945331	-0.0602975	-0.226858	-0.0124703	-0.0468744	0.06134	0.142142	12
APH1A	0.103951	-0.0199267	-1.06064	-0.904467	-0.0919401	0.0652363	0.773247	0.831441	0.486366	0.547333	15
API5	-0.249678	-0.167924	0.599657	0.543281	0.0481179	0.113824	0.0262894	0.0853919	-0.319281	-0.308703	146
APIP	1.59247	1.65128	2.03373	1.98438	0.000561129	0.0164334	-0.480524	-0.456971	-0.467967	-0.360168	30
APLP1	-0.251679	-0.0996359	-0.178041	-0.200034	0.00856539	-0.278085	0.294157	0.215313	0.226391	0.312733	7
APLP2	-0.737991	-1.14848	-1.04031	-0.918804	0.0147629	0.101913	0.550111	0.68035	0.375734	0.440899	31
APMAP	-0.352708	-0.441416	-0.887281	-0.910666	0.161341	0.130622	0.394618	0.468143	0.0244675	0.0715496	113
APOA1	2.91827	2.67347	0.633707	0.603453	-0.454602	-0.440441	-0.117413	-0.0253658	-0.378816	-0.297771	4
APOB	-0.494325	-0.548252	-0.912882	-0.6902	0.0157489	0.0350101	1.06705	1.14465	0.528419	0.532949	32
APOBEC3B	0.00530341	0.0138475	-0.685485	-0.406797	0.836235	0.912466	-0.0672147	-0.0112168	0.17711	0.0856975	9
APOBEC3C	-0.16685	-0.228335	0.410146	0.27665	0.0119618	-0.0057581	-0.365131	-0.257347	0.534016	0.505967	2
APOBR	0.409573	0.480456	0.0322789	-0.0478146	-0.869221	-0.0358882	-0.371209	-0.556438	0.753589	-0.130891	8
APOE	0.246568	0.144594	-0.696068	-0.709938	0.0589865	0.0557621	0.685109	0.51522	-0.0870977	0.105879	4
APOH	1.10245	0.959374	0.213453	0.574106	-0.739233	-0.394262	-0.143049	0.0635782	-0.143272	0.00346122	6
APOL2	0.0218009	-0.0309119	-0.732388	-0.781613	0.0758558	0.083586	0.387742	0.525803	0.0377396	0.119537	35
APOM	0.690854	0.664058	-0.448493	-0.251785	-0.0600789	-0.0761486	0.431645	0.415772	-0.135832	-0.0159699	2
APOO	-0.41907	-0.548766	-1.22639	-1.34739	0.944473	0.813234	1.1428	1.2194	-0.00484806	-0.0464819	10
APOOL	-0.11477	-0.0276462	-0.581451	-0.435454	0.718713	0.581147	0.956098	0.76458	-0.117261	-0.108977	26
APP	-1.16503	-1.0467	-0.810247	-0.822042	0.0380561	0.0618135	0.596346	0.632418	0.280914	0.398031	67
APPBP2	1.27969	1.45633	0.894307	0.896822	-0.17448	-0.026528	-0.157525	-0.10358	-0.297903	-0.113595	7
APPL1	1.83431	1.75271	0.0296226	0.0678812	-0.405066	-0.416743	-0.00829682	-0.0337606	-0.178939	-0.216957	60
APPL2	1.34981	1.20927	-0.0256659	0.0428648	-0.544778	-0.33082	-0.0818489	-0.00548517	-0.314437	-0.228565	25
APRT	0.940756	0.910775	0.992498	0.838928	-0.118836	-0.111524	-0.0950549	-0.0132034	-0.461276	-0.454866	54
APTX	-1.01917	-0.957289	0.411423	0.464279	-0.236774	-0.182572	-0.0978644	-0.00655147	0.849178	0.85	28
AQP3	0.441784	0.422613	-0.377851	-0.160815	-0.525268	-0.71645	0.487981	-0.143132	0.283677	0.112052	1
AQR	-0.621144	-0.716005	0.736879	0.736361	0.486064	0.585331	-0.252471	-0.223924	0.000913344	-0.00672158	135
AR	0.41589	0.277507	0.509907	0.401436	-0.485717	-0.373046	-0.05899	0.0964012	-0.066004	-0.0173247	3
ARAF	2.29879	2.05743	-0.179795	-0.141969	-0.277566	-0.355517	0.00992107	0.0809068	-0.0978365	-0.0645164	19
ARAP1	1.76044	1.61156	0.135497	0.0932221	-0.377085	-0.373506	-0.0678044	-0.00231828	-0.442371	-0.330903	35
ARAP2	0.844191	0.784767	0.322719	0.0305121	-0.177993	-0.0604233	-0.0688292	-0.0205313	-0.106216	-0.288445	4
ARAP3	1.55674	1.24229	0.159	0.0542403	-0.403803	-0.292785	0.0686895	-0.10553	-0.342579	-0.311529	10
ARC	-1.49517	-1.45705	-1.81021	-2.2204	0.447781	0.337133	0.763841	0.116569	0.174574	-0.0872289	1
ARCN1	0.53283	0.373209	0.281226	0.248029	-0.65815	-0.613942	-0.113818	-0.0226696	-0.0863746	0.0909384	118
AREG	-1.06151	-0.904563	-1.17556	-0.927237	0.132451	0.0141338	0.71014	0.755918	1.17783	1.2127	4
AREL1	-0.598482	-0.696278	-1.33209	-1.38344	0.0731985	0.073386	0.351376	0.502071	0.16654	0.275281	5
ARF4	1.2001	1.05745	-0.0831558	-0.11166	-0.465817	-0.51613	0.0228701	0.0370033	-0.165145	-0.0436165	77
ARF5	1.01714	0.875085	-0.0321156	-0.11084	-0.489975	-0.48748	0.0180065	-0.00933911	-0.097231	-0.0289073	37
ARF6	-0.506868	-0.510423	-0.0449916	-0.0882944	-0.209987	-0.117551	0.222809	0.471094	0.134329	0.132357	36
ARFGAP1	0.652152	0.792757	-0.413494	-0.581736	-0.338629	-0.477761	0.262377	0.0898323	0.0694215	0.0525515	30
ARFGAP2	2.54529	2.38765	0.455561	0.43822	-0.197243	-0.299019	-0.0447291	-0.0588839	-0.407361	-0.470001	38
ARFGAP3	2.46989	2.23764	0.492103	0.398291	-0.385002	-0.501921	-0.0689361	-0.0472316	-0.44183	-0.614508	41
ARFGEF1	2.02259	1.91721	0.220544	0.0854093	-0.555139	-0.571904	-0.0372887	-0.105556	-0.107462	-0.22077	71
ARFGEF2	1.41112	1.27826	0.290117	0.0648119	-0.473265	-0.528091	0.00160774	-0.0938178	-0.116768	-0.222196	69
ARFGEF3	1.06729	0.904574	0.206805	-0.0299194	-0.145589	-0.106612	-0.0508561	-0.183529	-0.189362	-0.150835	13
ARFIP1	2.30718	2.106	0.587695	0.488988	-0.218838	-0.256648	-0.0710765	-0.0721613	-0.250825	-0.276809	43
ARFIP2	1.21549	1.18376	0.238432	0.0135807	-0.350748	-0.51638	-0.0626315	-0.0202989	-0.182727	-0.305376	28
ARFRP1	-0.149259	-0.300885	-0.740774	-0.907879	0.0928625	0.0241867	0.818316	0.832299	0.487139	0.510482	15
ARG2	-0.319889	-0.484761	0.124512	0.269058	0.0826988	0.222893	0.0170652	0.0688181	-0.601009	-0.604707	4
ARGLU1	-0.456671	-0.506873	1.46466	1.53416	0.611168	0.526707	0.0128625	-0.141551	-0.418157	-0.455437	32
ARHGAP1	1.84097	1.71166	0.273352	-0.0365011	-0.222903	-0.536666	0.0401946	-0.124553	-0.177457	-0.389421	55
ARHGAP10	0.106598	0.153015	0.433045	0.428796	-0.482132	-0.518874	0.0974681	0.0928274	0.0580855	-0.0228226	29
ARHGAP11A	-0.564077	-0.514944	-1.12863	-1.01638	0.710465	0.696644	0.38129	0.246778	-0.0387873	0.0958903	14
ARHGAP12	1.53405	1.43742	0.548655	0.353233	-0.385478	-0.62567	-0.103649	-0.125887	-0.0269172	-0.0662863	27
ARHGAP17	1.79953	1.61141	0.271562	0.200164	-0.562818	-0.549529	-0.0434599	-0.0488718	-0.228382	-0.240093	55
ARHGAP18	1.86692	1.7138	0.146839	-0.00481793	-0.60487	-0.507124	0.0394824	-0.0167937	-0.197377	-0.209868	48
ARHGAP21	-0.419731	-0.380309	0.0338865	0.0960153	0.0226718	-0.0742808	0.366292	0.474451	-0.0461489	0.0288485	94
ARHGAP23	0.308007	0.172457	-0.295374	-0.345763	-0.148511	-0.0750986	0.310036	0.22668	0.144818	0.0905586	29
ARHGAP25	0.708481	-0.0515435	-0.180168	0.140544	-0.66647	0.0635479	0.170059	0.338302	-0.230375	-0.685698	1
ARHGAP26	0.086113	0.0762767	0.27697	0.163244	-0.167846	-0.0325459	0.145933	-0.0424072	0.0407308	0.179204	11
ARHGAP27	1.91977	1.62345	0.435905	0.351082	-0.929407	-0.942819	-0.0724759	-0.169063	-0.00803783	-0.0877114	8
ARHGAP28	0.759457	0.783591	-0.360479	-0.301718	-0.371998	-0.443921	0.150512	-0.0133587	0.128109	0.0347218	1
ARHGAP29	1.13323	1.0031	0.122764	-0.0612319	-0.349151	-0.397288	0.000584983	-0.0273991	-0.165925	-0.180266	29
ARHGAP32	0.230417	0.323809	0.151363	0.100027	-0.241846	-0.512519	-0.211301	-0.0201592	0.0641778	0.132439	3
ARHGAP35	1.82551	1.64944	0.35766	0.36135	-0.472579	-0.536686	-0.0511894	-0.0261998	-0.294727	-0.308604	80
ARHGAP39	-0.361619	-0.504588	-0.198677	-0.221921	-0.0609264	-0.0813922	0.203237	0.389498	0.190105	0.291182	22
ARHGAP42	0.379953	0.827443	0.0171367	-0.0589434	-0.393397	-0.406492	-0.0079356	-0.0915032	-0.123777	0.204873	7
ARHGAP44	2.01229	1.89957	0.250363	0.229434	-0.268899	-0.505756	-0.059669	-0.0326626	-0.0307148	-0.161743	3
ARHGAP45	1.40098	1.22808	0.4115	0.439914	-0.422982	-0.346639	-0.0879073	-0.055342	-0.212527	-0.244815	26
ARHGAP5	1.6373	1.4668	0.19955	0.273265	-0.429693	-0.417828	-0.0652254	-0.0530127	-0.17078	-0.181025	76
ARHGDIA	3.06466	2.90922	0.99557	0.974691	-0.158005	-0.0814604	-0.205066	-0.0869997	-0.245431	-0.276988	87
ARHGDIB	0.823697	0.486094	-0.0112337	0.167636	-0.395793	0.100548	-0.277438	-0.0762809	0.0335417	-0.45318	79
ARHGEF1	1.96107	1.84849	0.104758	0.0182052	-0.347436	-0.324305	-0.00402378	-0.0413679	-0.293817	-0.314321	95
ARHGEF10	1.90255	1.83766	0.268907	0.0669051	-0.317445	-0.554779	0.0224725	-0.076356	-0.288593	-0.243027	42
ARHGEF10L	1.69599	1.38421	0.0507752	-0.691038	-0.518583	-0.238467	0.160248	0.160427	-0.00413084	-0.139064	3
ARHGEF11	0.462193	0.341017	-0.0156398	-0.123971	-0.295541	-0.3973	0.0928665	0.133987	-0.0638601	-0.0131633	58
ARHGEF12	1.21511	1.05649	-0.0379615	-0.104637	-0.300015	-0.379813	0.0498743	0.0217143	-0.191782	-0.202883	51
ARHGEF16	1.8605	1.73269	0.292985	0.236076	-0.234815	-0.256328	-0.106895	0.0141907	-0.293321	-0.35652	31
ARHGEF17	-0.00363536	-0.0295978	-0.22676	-0.240727	0.0634448	0.0413614	0.520494	0.518173	0.0320257	0.0517119	31
ARHGEF2	0.469816	0.290498	-0.675453	-0.836124	-0.431062	-0.459764	0.190013	0.232303	0.184021	0.162158	77
ARHGEF26	0.157779	0.320324	0.0348953	0.141113	-0.0827596	-0.250912	0.0419576	-0.0629294	-0.0452794	0.0533575	4
ARHGEF28	1.44756	1.33996	-0.0616635	0.00445695	-0.454729	-0.253823	-0.0306566	-0.0341021	-0.0254597	-0.174783	5
ARHGEF3	-0.0877127	-0.142556	-0.27271	-0.247258	-0.11538	-0.0586431	0.393487	0.351511	0.163849	0.24638	13
ARHGEF39	-0.613783	-0.179121	-0.908131	-0.92991	0.0280382	0.0178737	0.450707	0.470449	0.744199	0.668851	13
ARHGEF4	0.0404991	0.00846677	-0.119018	-0.144604	0.0203632	0.0149663	0.661472	0.0328889	0.255133	-0.0115258	5
ARHGEF40	-0.194356	-0.0857641	-0.243329	-0.281057	-0.0981677	-0.0476941	0.51472	0.413865	0.645494	0.555932	57
ARHGEF7	1.59501	1.4511	0.509323	0.520433	-0.609424	-0.606552	-0.106007	-0.171607	-0.00500353	-0.0849354	38
ARID1A	-0.859958	-0.969445	0.260928	0.20689	0.839434	0.875308	-0.217443	-0.358857	0.021762	-0.0325745	82
ARID1B	-0.790355	-0.840823	0.255404	0.230234	0.813804	0.884551	-0.171651	-0.247761	0.0123175	-0.0540941	63
ARID2	-0.67189	-0.976416	-0.778682	-0.86627	1.17754	1.19334	0.0707662	-0.152251	0.412086	0.239064	63
ARID3A	-0.933897	-0.833372	0.552402	0.454	0.0323256	-0.0374999	0.167397	0.368182	-0.218015	-0.0327991	3
ARID3B	0.309232	0.231554	0.576954	0.512683	-0.419364	-0.161862	0.0948968	0.0429122	0.0346209	0.0527242	1
ARID4A	-0.734352	-0.760915	-0.186935	-0.0633875	1.11169	1.13777	-0.0640538	-0.172513	-0.00279318	-0.0159286	46
ARID4B	-1.24794	-1.1751	0.165458	0.25376	0.55945	0.554603	-0.393977	-0.490272	0.106019	-0.0156881	73
ARID5B	-1.04693	-1.12139	0.0835239	0.0595675	0.0196406	0.0790798	0.0804971	0.105339	-0.0165766	-0.0206634	27
ARIH1	1.2712	1.22117	1.09616	1.14924	-0.25037	-0.157635	-0.0867524	-0.10344	-0.451186	-0.511602	39
ARIH2	1.63819	1.56299	1.14783	1.01184	-0.334944	-0.268264	-0.0938205	-0.0703694	-0.257388	-0.331177	44
ARL1	-0.14481	-0.198424	-0.439149	-0.534179	0.0653281	-0.0653977	0.631008	0.711508	0.263413	0.184922	36
ARL10	-1.36865	-1.35277	-0.944135	-1.0634	0.373011	0.241474	1.02366	1.03146	-0.0988862	0.157975	9
ARL13B	-1.15193	-1.18794	-1.69096	-1.57877	0.0884436	0.0522678	0.940411	1.0552	0.985883	0.905081	20
ARL14EP	0.302317	0.271527	0.968778	0.878537	0.179571	0.251554	-0.0550424	-0.187897	-0.606888	-0.389931	11
ARL15	-1.06409	-0.833743	-1.36952	-1.06461	0.100209	-0.0220681	0.951343	1.21319	1.02605	1.07877	13
ARL16	0.884073	0.963585	-0.190051	-0.160015	-0.612897	-0.318734	0.0171805	0.128866	-0.068958	0.0394501	1
ARL2	1.48664	1.34417	-0.200769	-0.130073	-0.22402	-0.282367	0.0331894	0.071378	-0.878813	-0.886762	9
ARL2BP	2.08695	2.13544	1.48041	1.46112	-0.0261539	-0.1569	-0.0779785	-0.118628	-0.331069	-0.361362	14
ARL3	3.25965	3.01186	0.961094	0.757247	-0.0988053	-0.217229	-0.0817755	-0.127499	-0.253544	-0.278497	45
ARL4A	0.711904	0.590284	-0.522573	-0.480528	-0.542345	-0.702406	0.0929079	0.16008	0.0429777	0.0443673	1
ARL5A	-0.132491	0.160286	0.109481	0.105521	0.0294715	0.117113	0.487323	0.613347	-0.0243464	-0.131164	1
ARL5B	0.92673	0.755661	-0.0471568	0.243686	-0.246253	-0.321018	-0.0258754	0.00665628	-0.209649	-0.304819	3
ARL6	2.3709	2.36022	-0.0577702	0.252712	-0.244432	-0.461499	0.0609388	0.0345466	-0.458139	-0.275958	6
ARL6IP4	0.162633	0.395914	2.18085	2.12118	0.0781754	0.116171	-0.119702	-0.123728	-0.468733	-0.32318	14
ARL6IP5	-0.484253	-0.445258	-1.02085	-0.792561	0.0742088	0.107214	0.285617	0.356741	0.0848186	0.159275	37
ARL6IP6	0.159018	0.101013	-0.415052	-0.181679	1.62495	1.60373	0.691195	0.589527	-0.309784	-0.272206	8
ARL8A	-0.362921	-0.29536	-0.223097	-0.144115	-0.1122	-0.0238152	0.726803	0.77553	0.569131	0.622087	22
ARL8B	-0.371811	-0.244443	-0.675706	-0.66966	-0.160614	0.0147461	0.908109	1.07885	1.21735	1.15698	34
ARMC1	-0.205729	-0.255369	-0.71671	-0.619327	0.652178	0.560217	1.05139	1.11399	-0.166192	0.0194836	20
ARMC10	-1.1193	-0.761684	-1.61182	-1.50785	0.469836	0.512206	1.00507	1.11579	-0.0517178	0.11974	27
ARMC4	1.97114	1.79247	-0.240468	-0.136224	-0.0290493	-0.649176	-0.0194572	0.190084	-0.260042	0.00295582	2
ARMC5	0.186716	0.184536	0.212913	0.187001	-0.472817	-0.487491	-0.0405757	0.0562683	0.0247659	0.0280626	14
ARMC6	1.82104	1.67743	0.269319	0.0676367	-0.377073	-0.376177	0.00408273	-0.034527	-0.19283	-0.361093	40
ARMC7	0.943928	0.869247	0.664831	0.724305	0.0285123	-0.0749927	-0.0363256	-0.118343	-0.811444	-0.500325	5
ARMC8	0.381873	0.284089	-0.0186122	-0.0103955	-0.345637	-0.264862	-0.409857	-0.369162	0.482555	0.27017	28
ARMC9	2.53646	2.38015	0.220458	0.33529	-0.312577	-0.485887	-0.179941	-0.0575144	-0.154225	-0.1049	12
ARMCX1	-1.13257	-0.851184	-0.969864	-0.669108	0.648667	0.451969	0.783461	1.00181	-0.0541734	0.092678	14
ARMCX2	-0.537484	-0.61406	-0.981314	-1.00389	0.515862	0.425406	0.93805	1.03244	-0.0135883	0.0690132	43
ARMCX3	-0.901464	-0.783541	-0.40735	-0.411527	0.38457	0.333123	0.786546	0.882172	-0.0232272	0.0721459	56
ARMCX4	0.0632758	-0.44757	-0.546051	-0.0816609	0.0519876	0.227222	0.376827	0.377049	-0.0587539	0.109743	2
ARMCX5	0.428242	0.452216	-0.219415	-0.264672	-0.584213	-0.630003	-0.000280837	-0.0574288	0.551576	0.343739	11
ARMCX6	-0.569934	-0.780264	-0.721647	-0.739301	0.469022	0.382997	1.07677	1.09883	0.00135545	0.0859896	5
ARMT1	2.50038	2.45398	1.63152	1.69235	0.0122935	-0.0071138	-0.157567	-0.164357	-0.410517	-0.168339	15
ARNT	-0.536684	-0.405499	1.30922	1.36378	0.108391	0.126235	-0.00933383	0.00782266	-0.303955	-0.194546	29
ARNTL	-0.546215	-0.465343	1.0592	1.11916	0.376797	0.430294	-0.0121222	0.00352043	-0.310526	-0.407252	9
ARNTL2	-0.073326	0.973393	1.21169	1.22721	0.172091	0.0955233	-0.277517	-0.0401796	-0.375758	-0.0803695	1
ARPC1A	0.839897	1.15634	0.113922	0.330987	-0.208649	-0.301247	-0.00912895	0.0365845	-0.052516	-0.0915639	16
ARPC1B	-0.337529	0.128865	-0.562685	-0.414986	-0.000250021	0.116454	0.630918	0.737132	0.786175	0.887958	7
ARPC2	1.43009	1.29845	0.222343	0.336875	-0.311793	-0.322285	-0.106578	-0.064086	-0.128916	-0.146115	155
ARPC3	1.55867	1.39878	0.145168	0.240177	-0.413629	-0.373988	-0.122934	-0.0913894	-0.06651	-0.209969	65
ARPC5	1.75903	1.65199	0.330484	0.361603	-0.444021	-0.419645	-0.129098	-0.00212227	-0.086141	-0.282763	46
ARPC5L	1.08663	0.88318	-0.00287125	0.0822059	-0.247057	-0.346215	-0.0396006	0.010572	-0.205432	-0.0672965	36
ARPP19	2.27922	2.1981	1.14402	1.05547	0.140833	-0.166357	-0.615507	-0.825455	-0.471935	-0.323083	7
ARRB1	1.97154	1.89428	1.18446	0.978782	0.0227953	-0.169292	-0.298541	-0.131952	-0.543697	-0.666152	6
ARRB2	1.54898	1.48161	0.823737	0.906498	-0.281966	-0.271837	-0.0996108	0.00879213	-0.337281	-0.309066	29
ARRDC1	0.193207	0.0475034	0.172406	0.111198	-0.57406	-0.746706	0.0135056	0.0952429	0.338156	0.305725	5
ARRDC3	-0.0871505	-0.531692	-0.43063	-0.227817	-0.570536	-0.599094	0.380518	0.49549	0.558084	0.460293	4
ARSA	-0.278157	-0.138853	0.601661	0.581474	-0.469121	-0.522312	0.271574	0.378986	-0.0328284	0.0275176	15
ARSB	-0.880533	-1.00719	0.346215	0.370117	-0.213604	-0.222448	0.313303	0.368243	0.0563361	-0.0369356	23
ARSG	-0.664809	-0.61597	-0.259939	-0.362428	0.257314	0.143318	0.722235	0.597561	-0.0249372	0.387241	1
ARSJ	0.687184	0.572254	0.23073	0.431429	-0.150809	-0.058332	-0.0545438	-0.0870569	0.0281941	-0.194022	1
ARSK	-0.517041	-0.69861	0.49791	0.656717	-0.194577	-0.213536	0.322325	0.250665	0.0684481	-0.0863434	9
ARV1	-3.64187	-3.83252	-3.66411	-3.26576	0.142807	0.0694128	0.545577	0.600397	0.16682	0.201608	4
ARVCF	-0.352709	-0.229408	-0.815822	-0.674952	0.108984	-0.0468277	0.719051	0.811344	0.496447	0.623196	18
AS3MT	1.82993	1.67526	0.446119	0.340107	-0.357697	-0.298586	-0.0785571	-0.077437	-0.330553	-0.326723	16
ASAH1	-0.836857	-1.05214	-0.0751256	0.0441758	-0.534202	-0.49476	0.370965	0.370486	0.293989	0.11031	44
ASAP1	1.33125	1.15175	0.10472	0.0272464	-0.507546	-0.562452	-0.0790294	-0.0133022	-0.182247	-0.119393	27
ASAP2	1.41143	1.26807	0.167012	-0.00738786	-0.414441	-0.438698	-0.068328	-0.0282768	-0.166061	-0.153894	26
ASAP3	1.66473	1.55744	-0.0530837	-0.141318	-0.20736	-0.41294	0.0942892	0.0187012	-0.256071	-0.3799	12
ASB1	1.08851	0.872982	0.402153	0.300728	0.0452432	-0.124854	-0.122898	-0.146044	-0.155959	-0.293839	4
ASB14	1.49787	1.26681	0.225482	0.230645	-0.162412	-0.21009	-0.0618472	-0.257125	0.0354975	-0.393076	1
ASB6	1.63976	1.62291	0.896184	0.972908	-0.245659	-0.271103	-0.0958461	-0.0308161	-0.44945	-0.386016	14
ASB7	0.0273799	0.101779	1.02815	0.89217	0.114872	0.278034	-0.0483493	-0.0744897	-0.168476	-0.0457332	4
ASB8	1.24079	1.16263	0.336795	0.405912	0.0339385	0.0491503	-0.154915	-0.0859853	-0.211686	-0.450565	2
ASB9	2.44972	2.31294	0.852838	0.802254	-0.343316	-0.282675	-0.107746	-0.0110729	-0.549251	-0.477419	6
ASCC1	0.337404	0.273755	0.0731123	0.0191297	-0.887919	-0.714565	-0.154452	-0.213433	0.36297	0.328773	24
ASCC2	-0.0520127	0.00039856	0.0548942	-0.0108069	-0.709834	-0.674104	-0.0359709	-0.0403378	0.458449	0.346179	53
ASCC3	0.203533	0.167197	0.0658556	0.0233695	-0.57451	-0.603901	-0.0712518	-0.0480282	0.470311	0.301516	214
ASF1A	-0.5201	-0.617526	0.493373	0.516318	-0.293627	-0.207863	-0.106807	-0.0316998	0.770764	0.585465	20
ASF1B	-0.0924025	-0.251516	0.555118	0.573169	-0.627529	-0.53308	-0.193582	-0.167145	0.53745	0.26617	11
ASH1L	-0.417238	-0.478912	-0.608862	-0.647358	1.0001	0.988615	0.0163921	-0.107324	0.242143	0.11474	44
ASH2L	-0.957081	-0.903671	1.01875	1.06815	0.530638	0.511129	-0.431637	-0.506294	0.0517923	-0.0624516	50
ASIC1	0.0140666	-0.0584491	-0.7795	-0.558527	-0.135453	0.0644766	0.436543	0.635222	0.206385	0.362741	8
ASL	1.93206	1.72614	0.749906	0.893934	0.0172696	-0.315086	-0.160546	-0.16398	-0.54144	-0.562012	10
ASMTL	1.84585	1.82503	0.454802	0.456374	-0.195205	-0.210664	-0.0642094	-0.101113	-0.387762	-0.465013	33
ASNA1	0.806083	0.729058	0.00973026	-0.0243548	-0.43802	-0.480898	-0.0259165	0.0406664	-0.0805839	-0.0918712	68
ASNS	2.20323	2.14488	0.785283	0.784038	-0.168893	-0.255206	-0.10565	-0.0595389	-0.438775	-0.388272	100
ASNSD1	1.60492	1.42688	0.907596	0.848028	-0.37599	-0.393709	-0.238749	-0.127164	-0.131732	-0.194156	19
ASPH	-1.07018	-1.04093	-1.49391	-1.42907	0.142486	0.136662	0.527852	0.647528	0.0498249	0.122559	245
ASPHD1	0.231461	-0.105828	-0.295963	-1.42956	0.0156697	0.417881	0.764538	0.274278	-0.0783225	0.159024	3
ASPM	-0.559462	-0.457966	-1.03967	-0.979486	0.0800975	0.0678507	0.0614208	0.0229484	0.580198	0.352055	43
ASPSCR1	1.7877	1.71452	0.503373	0.893641	-0.335982	-0.444972	-0.278192	-0.349734	-0.0186985	0.012547	13
ASRGL1	2.6665	2.34568	1.57986	1.55469	-0.0796841	-0.332046	-0.268999	-0.213064	-0.471987	-0.649014	7
ASS1	2.66539	2.48604	1.14322	1.14046	-0.0559539	-0.147529	-0.335663	-0.320193	-0.259147	-0.282772	70
ASTE1	-0.0252151	0.105301	-0.106814	-0.141174	-0.305137	-0.153544	0.340426	0.322005	1.33195	1.27926	5
ASXL1	0.377342	0.340596	0.384368	0.393616	-0.279126	-0.358	-0.408341	-0.325831	0.254444	0.235317	13
ASXL2	-1.118	-1.18451	0.325503	0.355197	0.00632437	0.0902454	-0.621401	-0.703406	0.628918	0.475652	22
ATAD1	-0.516552	-0.494359	-0.959552	-0.828639	0.470145	0.506484	0.86468	0.915492	-0.0398417	0.00533845	59
ATAD2	-0.244229	-0.172901	-0.48373	-0.451573	2.19953	2.12662	1.01745	0.776645	-0.120613	-0.0454617	122
ATAD2B	0.0706122	0.0642448	-0.411946	-0.381941	1.90802	1.89944	0.866436	0.613515	-0.128037	-0.0716477	41
ATAD3A	-0.49593	-0.381927	-0.767167	-0.74569	0.59959	0.634421	1.04378	1.07669	-0.0683028	0.0576055	58
ATAD3B	-0.319051	-0.415215	-0.935231	-0.870008	0.537562	0.478966	0.959141	1.08379	-0.101324	0.107375	45
ATAD5	-0.55167	-0.550143	-0.731841	-0.726495	1.07091	1.04564	0.0205104	-0.0712151	0.275031	0.092278	36
ATAT1	1.91845	1.76023	-0.0692508	-0.000957814	-0.6285	-0.770882	0.028544	-0.0261649	-0.458752	-0.626072	2
ATE1	2.28755	2.04521	1.79399	1.79343	-0.0156111	-0.000467788	-0.223687	-0.118858	-0.284792	-0.262488	42
ATF1	-0.697648	-0.731389	1.85435	1.95433	0.527176	0.615204	-0.0393363	-0.0529954	-0.48243	-0.410858	9
ATF2	0.00228193	-0.189979	-0.124184	-0.0949963	0.798362	0.819422	-0.00753312	-0.108048	-0.0817413	-0.106698	19
ATF3	-1.48278	-0.922215	-1.00811	-1.00551	1.6673	1.71268	0.409974	0.408145	0.00863528	0.158834	4
ATF6	-1.97889	-1.7525	-1.55682	-1.35401	0.0784682	0.0682388	0.548638	0.678646	0.211809	0.206991	14
ATF6B	-0.933807	-0.800531	-1.48946	-1.47736	0.117988	0.0186932	0.636914	0.699079	0.309938	0.271198	16
ATF7	-1.49537	-0.741687	-0.367677	-0.392344	0.614495	0.836941	0.00211501	-0.0634452	0.0734433	0.083623	7
ATF7IP	-0.227749	-0.292482	1.46163	1.54318	0.507107	0.612169	-0.158506	-0.0854514	-0.483889	-0.298802	46
ATG10	0.455113	0.858036	-0.842588	-0.641549	0.00721547	0.0543722	0.881823	0.658976	-0.220787	0.105389	1
ATG101	1.96521	1.85544	1.03612	1.13945	-0.128147	-0.30901	0.0114301	-0.141552	-0.482401	-0.504061	10
ATG12	2.25851	2.37687	0.310535	-0.0206621	-0.136221	-0.51054	-0.32196	-0.138216	-0.354036	0.304747	1
ATG13	1.56774	1.42438	1.15852	1.17948	-0.0973885	-0.162836	-0.204886	-0.0855943	-0.483674	-0.309601	14
ATG14	0.30411	0.239029	0.0875552	-0.0870304	-0.837689	-0.672938	0.0717324	0.187559	0.171682	-0.0757654	5
ATG16L1	2.23343	2.12245	0.592753	0.560359	-0.297584	-0.423595	-0.0391425	-0.120649	-0.3636	-0.316161	25
ATG2A	1.82612	1.6925	0.126795	0.136132	-0.286927	-0.342829	-0.000510248	-0.0045067	-0.284949	-0.297433	19
ATG2B	1.80824	1.6587	-0.0171412	-0.151946	-0.332878	-0.400561	0.108108	-0.0319261	-0.357004	-0.36803	24
ATG3	2.73369	2.70174	0.359741	0.447801	-0.304706	-0.400698	-0.148607	-0.0358453	-0.301604	-0.356999	19
ATG4A	2.85202	2.57464	0.782278	0.658447	-0.354632	-0.179087	0.0749308	-0.184818	-0.485469	-0.0909405	2
ATG4B	2.13637	1.99839	0.63726	0.447468	-0.362899	-0.516078	0.022501	-0.0656012	-0.449918	-0.375601	16
ATG4C	1.59633	1.3276	0.987129	0.972315	-0.687898	-0.456817	-0.235811	0.0303641	-0.151935	-0.199948	5
ATG5	1.44979	1.36504	0.455418	0.344151	-0.397781	-0.310146	-0.0806331	-0.0500187	-0.265179	-0.402764	7
ATG7	2.14134	2.09641	0.609123	0.585005	-0.402658	-0.39951	-0.121155	-0.0611095	-0.38342	-0.319136	43
ATG9A	-0.329629	-0.277064	-1.3672	-0.992797	0.0147983	0.0973589	0.798954	0.961083	1.60207	1.47685	28
ATIC	2.45469	2.28957	1.12149	1.14945	-0.149933	-0.152384	-0.211019	-0.114784	-0.359942	-0.297316	230
ATL1	-0.855384	-0.569769	-0.764674	-0.488555	0.102313	0.0773482	0.220697	0.368382	0.0761981	0.351777	6
ATL2	-0.796494	-1.00929	-1.00173	-1.10655	0.0538561	0.06259	0.351913	0.474415	0.970259	0.918306	58
ATL3	-1.06252	-1.02886	-1.21372	-1.19047	0.0571654	0.0729771	0.238994	0.340161	0.470388	0.415054	187
ATM	-0.188931	-0.273092	0.96548	1.02659	-0.22916	-0.184414	-0.153186	-0.081635	0.905827	0.921765	155
ATN1	0.486104	0.368315	1.7568	1.87716	0.0195736	0.130015	-0.349458	-0.359242	-0.502402	-0.529736	10
ATOH8	0.345654	0.442893	0.241153	-0.215941	0.243401	-0.0769708	-0.0825233	-0.0838172	0.00877794	0.177346	1
ATOX1	2.70761	2.64649	0.600104	0.734311	0.00987236	-0.0669493	-0.233301	-0.192072	-0.238653	-0.343599	22
ATP11A	-0.636016	-0.488623	-1.25857	-1.40044	0.0544663	0.0467099	0.757045	0.857383	1.06267	1.02979	33
ATP11B	-0.654769	-0.653776	-1.00634	-1.00478	0.0635204	0.045008	0.754258	0.829308	1.24086	1.15048	41
ATP11C	-0.76504	-0.756657	-1.37443	-1.28967	0.0749155	0.0530469	0.817732	0.951031	0.840713	0.947121	55
ATP12A	-1.4692	-1.38516	-1.9144	-1.8705	0.133859	0.0127258	0.887735	0.94741	0.525487	0.535821	2
ATP13A1	-0.97237	-0.83328	-1.23164	-1.13716	0.121609	0.0647583	0.53417	0.612888	0.112178	0.207915	97
ATP13A2	-0.144286	-0.0686517	-0.734133	-0.747086	-0.0696267	-0.0270036	0.649001	0.688153	0.848161	0.85814	16
ATP13A3	-0.689592	-0.766048	-1.21128	-1.02668	-0.0266498	0.101743	0.899138	0.99033	1.32328	1.26908	30
ATP1A1	-0.743975	-0.741312	-1.18079	-1.14289	0.0696226	0.0264164	0.798251	1.00643	0.478183	0.532989	257
ATP1A2	-0.528947	-0.240555	-0.992363	-1.03355	0.089348	0.0572366	0.679327	0.941865	0.66301	0.881019	1
ATP1B1	-1.43075	-1.33539	-1.55889	-1.47971	0.0702178	0.063384	0.782316	0.986544	0.525998	0.637458	54
ATP1B2	3.63621	3.20374	1.80015	1.922	-0.207008	0.0746208	-0.392661	-0.427002	-0.614947	-0.680675	6
ATP1B3	-0.715369	-0.808925	-1.21713	-1.16691	0.0593237	0.0585733	0.686417	0.842605	0.427207	0.408504	47
ATP23	0.0215992	0.187597	-0.343997	-0.213335	0.30986	0.516224	0.762346	0.951944	-0.00274712	0.0678218	3
ATP2A2	-0.6651	-0.698359	-1.04025	-0.953143	0.0599092	0.0899908	0.472213	0.556196	0.121502	0.160937	184
ATP2A3	-1.18391	-1.17406	-1.45866	-1.16881	0.0796384	0.0923329	0.431622	0.508837	0.0708074	0.168365	49
ATP2B1	-0.82501	-0.790213	-1.24419	-1.19993	0.0532357	0.0291981	0.81731	0.931297	0.543093	0.584272	84
ATP2B2	-1.28509	-1.13142	-1.25016	-1.49957	0.0902474	0.0614144	0.631042	0.849372	0.205958	0.580226	3
ATP2B4	-0.893602	-0.815339	-1.2609	-1.29569	0.0999119	0.0294553	0.733935	0.94375	0.416609	0.563144	82
ATP2C1	-0.790192	-0.760829	-1.37706	-1.37096	0.0844739	0.0445225	0.787737	0.883333	0.565431	0.641576	87
ATP5F1A	-0.580069	-0.603542	-0.804579	-0.788949	0.560996	0.52594	0.882194	0.926898	-0.0650209	0.0643183	774
ATP5F1B	-0.182653	-0.152232	-0.500895	-0.438744	0.402918	0.417553	0.721256	0.780591	-0.0855041	0.00371233	735
ATP5F1C	-0.840815	-0.893143	-1.10448	-0.994353	0.543085	0.543257	0.940674	0.993333	-0.0076836	0.0473651	81
ATP5F1D	-0.222245	-0.0654337	-0.484457	-0.311713	0.408072	0.448103	0.670123	0.714394	-0.116268	0.00399376	96
ATP5F1E	-1.51857	-1.67739	-1.27012	-0.982915	0.480241	0.413128	0.962243	0.993571	0.0621749	0.120476	9
ATP5IF1	-1.12033	-1.00321	0.0971724	0.371528	0.112506	0.0603805	0.0712118	0.0461638	-1.33957	-1.20321	34
ATP5MD	-2.23043	-2.19596	-2.45505	-2.35334	0.726721	0.648495	1.23218	1.14055	0.0404542	0.0468909	21
ATP5ME	-0.864034	-0.653854	-1.12629	-1.17677	0.715749	0.570771	0.99646	0.918463	-0.00250541	0.026187	36
ATP5MG	-0.64799	-0.67454	-1.24487	-1.11218	0.481494	0.543751	0.967941	0.940732	0.0459813	-0.0565094	19
ATP5MPL	-2.21249	-2.25367	-1.62205	-1.98886	0.753435	0.401666	1.1417	0.664038	0.18468	-0.0276462	2
ATP5PB	-0.658628	-0.779863	-0.944709	-0.893252	0.553328	0.502508	0.861492	0.976498	-0.024323	0.0566615	84
ATP5PD	-0.895996	-0.724445	-1.06919	-1.03509	0.550764	0.547876	0.926498	0.986523	-0.063767	0.0510931	136
ATP5PF	-1.57183	-1.41711	-1.9403	-1.73067	0.541742	0.533396	0.837548	0.291981	0.0794874	-0.00141168	46
ATP5PO	-0.779693	-0.903126	-1.3548	-1.07577	0.503649	0.446958	0.881434	0.871602	-0.0329257	0.0779692	33
ATP5S	-0.290622	-0.167964	-0.221184	-0.16481	0.337495	0.207208	0.48611	0.380118	-0.279442	-0.24267	17
ATP6AP1	-0.648616	-0.658598	-1.03779	-1.50881	0.100208	0.0860295	0.441806	0.542617	0.147305	0.268617	15
ATP6AP2	-0.862654	-0.6956	-1.30598	-1.26874	0.1011	0.0599976	0.471846	0.533864	0.139437	0.239442	39
ATP6V0A1	-0.220283	-0.131771	-0.965819	-0.855456	-0.00339012	-0.0421987	0.68501	0.781723	1.10236	1.0419	56
ATP6V0A2	-0.525939	-0.490124	-0.720131	-0.803229	0.0657396	0.0349901	0.677708	0.807823	1.0048	0.935692	36
ATP6V0A4	-0.0196241	-0.186383	-0.604421	-0.728824	0.0103171	0.0404891	0.552201	0.753348	1.27416	1.19488	8
ATP6V0C	-2.08767	-1.57481	-1.50923	-1.49997	0.0887185	-0.1339	0.904753	0.629203	1.22517	0.955162	10
ATP6V0D1	-0.0850572	-0.133109	-0.632276	-0.582	-0.0134696	-0.078213	0.753347	0.888438	0.952151	0.943256	56
ATP6V0D2	0.54262	0.0769052	-2.14304	-1.98113	-0.612521	-0.377185	0.617279	0.779195	0.995341	0.972411	1
ATP6V1A	0.909083	0.719928	-0.190937	-0.208544	-0.70237	-0.617352	-0.0419925	0.143048	0.044853	0.0916064	194
ATP6V1B2	0.358271	0.180112	-0.280599	-0.337963	-0.470438	-0.449565	0.279689	0.539244	0.367705	0.53356	83
ATP6V1C1	0.671865	0.486182	-0.309668	-0.347167	-0.863452	-0.850264	-0.0216041	0.226381	0.0554261	0.147907	73
ATP6V1D	0.712082	0.455021	-0.472278	-0.577707	-0.911009	-0.743357	-0.0338539	0.102862	0.156943	0.195378	26
ATP6V1E1	0.568405	0.255559	-0.476147	-0.477507	-0.689066	-0.581692	0.0302241	0.322351	0.139353	0.383583	48
ATP6V1F	0.369661	0.34137	-1.01976	-0.836174	-0.420938	-0.46623	0.0850312	0.19066	0.278661	0.340036	23
ATP6V1G1	0.442878	0.261251	-0.389319	-0.47313	-0.866199	-0.635719	0.0160794	0.252305	0.0857222	0.247207	13
ATP6V1H	0.506283	0.288311	-0.463968	-0.438664	-0.573416	-0.459672	-0.00155533	0.173776	0.0856149	0.175225	56
ATP7A	-0.812459	-0.698215	-1.18944	-1.17988	0.0284597	0.0451816	0.646781	0.804267	0.893097	0.804633	59
ATP8A1	0.128825	0.192579	-0.536482	-0.640246	-0.103992	-0.113474	0.523667	0.753828	1.06116	0.914413	10
ATP8B1	-0.649628	-0.941479	-1.37432	-1.7094	0.150708	-0.00412319	0.749481	0.980988	0.89413	1.10613	3
ATP8B2	-0.469258	-0.318924	-0.847284	-1.09764	0.120399	0.0284884	0.85784	0.897014	0.456998	0.557401	17
ATP9A	-0.358918	-0.392212	-0.730024	-0.799308	-0.0630915	0.0229448	0.66845	0.860127	1.16042	1.12294	36
ATP9B	-0.208447	-0.0290732	-0.49279	-0.478332	-0.151775	0.0212543	0.326407	0.53393	0.935521	1.25176	22
ATPAF1	-0.762534	-0.883701	-0.232559	0.0265144	0.282663	0.177845	0.3661	0.384206	-1.18299	-0.971076	19
ATPAF2	-0.348139	-0.50813	0.0316517	0.203445	0.10661	0.0782901	0.329903	0.218315	-0.975863	-0.849875	29
ATR	-0.342506	-0.378283	0.585882	0.613409	-0.272603	-0.21774	-0.106507	-0.0409609	0.565221	0.587109	139
ATRAID	-0.507988	0.267187	-0.0285234	0.1386	-0.0346807	-0.127906	-0.115255	-0.0248637	0.599548	0.287317	1
ATRIP	-0.0955733	-0.0772931	0.364785	0.451358	-0.419055	-0.342339	-0.175423	-0.0876369	0.445982	0.493887	41
ATRN	-1.19957	-1.22393	-0.40204	-0.301401	0.0184587	-0.0303491	0.721991	0.763688	0.633942	0.560693	17
ATRX	-1.15678	-1.06406	-0.108636	-0.0464218	0.776193	0.822643	0.0834661	-0.036449	-0.616039	-0.490809	184
ATXN1	0.329108	0.1625	1.07876	1.1267	0.171064	0.189694	-0.247153	-0.223657	-0.153359	-0.209945	7
ATXN10	1.67584	1.52221	-0.103868	-0.193206	-0.64007	-0.604888	0.0657131	0.033559	-0.0236141	-0.102946	126
ATXN1L	0.119747	-0.0186596	1.43517	1.57951	0.454331	0.50364	-0.170614	-0.180646	-0.292294	-0.041676	15
ATXN2	0.826876	0.807964	0.919001	0.93289	-0.375709	-0.443964	-0.27959	-0.249839	0.0697551	0.00500553	54
ATXN2L	0.749186	0.745767	0.8719	0.987968	-0.403606	-0.43128	-0.452928	-0.348677	0.0793693	-0.0099397	97
ATXN3	1.44609	1.33249	0.977154	0.887379	-0.472724	-0.607445	-0.00917488	-0.136579	-0.480477	-0.48435	17
ATXN7	-0.400634	-0.463657	-0.262458	-0.337188	0.0860648	0.346067	0.172207	0.0449621	1.15024	1.02013	5
ATXN7L2	-0.633351	-0.253319	-0.0601076	-0.20286	-0.0338335	0.365274	-0.221815	-0.024087	0.816841	0.841916	5
ATXN7L3	-0.465977	-0.478069	-0.0181099	-0.0297053	0.0225275	0.178522	-0.278816	-0.2069	0.781628	0.680491	4
ATXN7L3B	2.43975	2.35755	1.30499	1.31675	-0.173918	-0.188804	-0.0627413	-0.0523407	-0.338018	-0.464944	6
AUH	-0.982009	-0.965909	-0.111825	0.215038	0.164662	0.0389992	0.0901281	0.164991	-0.600123	-0.375801	14
AUP1	-0.856683	-0.894041	-1.1909	-1.0612	0.116734	0.081841	0.422018	0.562832	0.0503855	0.206622	33
AURKA	0.39748	0.397009	0.33331	0.363215	-0.15431	-0.136771	-0.102511	-0.134995	-0.0916013	-0.0445703	15
AURKAIP1	-2.22234	-2.06896	-1.90874	-1.9432	0.163637	0.0403678	0.195429	0.14971	0.312486	0.363206	4
AURKB	-0.387977	-0.556518	-0.247256	-0.192518	0.777008	0.828136	0.354838	0.42381	-0.055576	-0.0140454	12
AUTS2	-0.146822	-0.372077	2.24348	2.31964	0.326281	0.276242	-0.247903	-0.0011496	-0.806235	-0.374087	4
AVEN	1.85672	1.80937	0.577583	0.528208	-0.663232	-0.614661	-0.241863	-0.325578	0.074328	-0.0765432	25
AVL9	0.805881	0.657886	-0.143049	-0.144311	-0.462432	-0.582374	-0.0543462	-0.119666	0.0568598	0.0578339	16
AVPI1	0.107643	-0.357227	-0.0871833	0.0829112	-0.163172	-0.447744	-0.257211	-0.227307	0.675667	0.552441	2
AXIN1	1.02609	0.909378	1.09644	1.19912	-0.328559	-0.27696	-0.0958988	-0.0893809	-0.370712	-0.188236	8
AXL	-0.855852	-0.778127	-1.03114	-1.15701	0.0393317	0.0275014	0.819234	0.997214	0.756931	0.804277	79
AZGP1	0.741863	0.547121	0.438077	0.00635898	0.0749296	-0.294669	-0.168816	0.247017	-0.367499	-0.620502	3
AZI2	1.71713	1.55251	0.790389	0.747701	-0.26363	-0.373273	-0.0217248	-0.10963	-0.345614	-0.400329	16
B2M	-0.353006	-0.464506	-0.664481	-0.637678	0.0421695	-0.0337137	0.720612	0.844097	0.758558	0.768073	69
B3GALNT1	-0.974902	-0.830245	-1.09456	-1.11309	0.247203	0.0459548	0.639331	0.626079	0.364353	0.332475	2
B3GALNT2	-0.590313	-0.813662	-1.24404	-1.01335	0.203147	0.151883	0.422497	0.54193	-0.0038792	0.0912242	5
B3GALT6	-0.492389	-0.709034	-1.26008	-1.14235	0.0375821	0.112476	0.792423	0.914508	0.212832	0.380293	19
B3GAT3	-1.00766	-0.641099	-0.676337	-0.719449	0.0766959	0.0501404	0.846499	0.949628	0.229384	0.324977	18
B3GLCT	-0.650339	-0.374787	1.05212	1.26136	0.0392285	0.0718983	0.303869	0.21782	-0.223739	-0.369862	20
B3GNT2	-0.493433	-0.79349	-1.3539	-1.66754	0.104638	0.0419464	0.966047	1.02806	0.659712	0.656717	6
B3GNT9	-1.77609	-1.86669	-2.16085	-2.39779	0.12399	-0.0642482	0.978138	1.09536	0.621498	0.640783	4
B3GNTL1	0.982297	0.920232	0.770113	0.0821201	-0.0601185	-0.0773248	-0.262908	0.0118812	-0.223499	-0.122699	3
B4GALNT1	-0.920524	-0.428551	-0.918503	-0.887755	0.0612761	0.0885879	0.508462	0.681174	0.23956	0.441189	8
B4GALT1	-0.0335197	-0.0492279	-0.610839	-0.498704	0.00104388	-0.0727999	0.583005	0.589476	0.267975	0.343147	70
B4GALT2	0.0609028	-0.0992657	-0.580281	-0.627926	0.0277391	-0.172269	0.450758	0.361237	0.303389	0.338543	3
B4GALT3	0.385533	0.233993	0.347523	0.415377	-0.0200419	-0.0113546	0.0489396	0.198272	-0.5198	-0.227638	3
B4GALT4	-0.652879	-0.0674126	-1.16988	-1.02668	0.150998	-0.0325094	0.910244	0.959152	0.657564	0.804404	3
B4GALT7	-1.45242	-1.31807	-1.07294	-1.32266	0.0195721	0.0373757	0.955802	1.06649	0.320402	0.432942	11
B4GAT1	-0.242189	-0.499727	-0.689418	-0.744755	0.0933291	0.0710504	0.611617	0.703499	0.0470049	0.384531	15
B9D1	0.62124	0.279671	0.111855	0.0536974	-0.244697	0.106748	0.0760933	-0.428816	-0.262213	-0.0769189	1
B9D2	0.260448	0.444121	-0.140719	-0.424627	-0.285789	-0.432251	-0.342752	0.0280021	0.838473	0.564503	1
BABAM1	1.33711	1.20781	0.274807	0.263017	-0.201398	-0.334386	-0.347961	-0.255057	0.0817016	0.0463852	18
BABAM2	1.30474	1.12405	0.215826	0.22506	-0.430413	-0.409261	-0.353401	-0.292195	0.0477012	0.0524104	19
BACE1	0.156891	-0.163417	-0.790312	-0.242333	-0.0744159	-0.360908	0.0411996	0.304134	0.443294	0.161467	2
BACE2	-0.843867	-0.94288	-0.880477	-0.986409	0.0464328	0.0330575	1.00854	0.983588	1.12442	1.15457	7
BACH1	0.764496	0.646229	-0.130061	-0.0527107	0.47534	0.366961	-0.185848	-0.229492	-0.621935	-0.639522	13
BAD	-0.318995	-0.471614	-0.668794	-0.809012	0.322262	0.21156	0.430658	0.569306	0.0284773	0.12506	11
BAG1	0.606332	0.508356	0.416628	0.482155	-0.191018	-0.117942	-0.31017	-0.412126	0.0914462	-0.0270276	60
BAG2	-0.158476	-0.0318455	-0.529137	-0.4413	0.0161701	0.0264556	0.278268	0.365036	0.497343	0.385983	129
BAG3	2.32838	2.14773	1.10767	0.978893	-0.0219714	-0.113961	-0.120213	-0.102213	-0.422668	-0.446272	51
BAG4	0.357453	0.448191	0.939504	0.87737	0.146644	0.0382562	-0.0646613	-0.111541	-0.552945	-0.655805	17
BAG5	0.524231	0.445395	0.462322	0.472336	-0.415454	-0.512048	-0.0362425	-0.0333037	-0.324964	-0.372546	43
BAG6	0.46902	0.495237	0.278714	0.161386	-0.381693	-0.376895	-0.081464	0.00210079	-0.0893654	0.0281504	62
BAHCC1	1.91958	2.23948	0.686636	0.941768	-0.180282	-0.25434	-0.464316	-0.584633	0.0921765	-0.00483143	1
BAHD1	-0.280935	-0.289372	-0.132809	0.0200354	0.473516	0.418677	-0.201103	-0.340866	0.0697933	0.0483247	8
BAIAP2	-0.210608	-0.092753	-0.364256	-0.352459	-0.138843	-0.0728159	0.598339	0.64755	1.22203	1.21841	49
BAIAP2L1	-0.32686	-0.256547	0.0415107	0.137331	-0.594876	-0.600301	-0.0861961	0.0464873	0.654659	0.727552	63
BAK1	0.163725	0.123543	-0.304748	-0.613996	0.148085	0.40254	0.625586	0.521272	-0.108674	-0.149276	11
BANF1	0.194539	0.155375	-0.0602915	-0.169704	0.32058	0.220338	0.0512736	-0.321137	-0.00732575	-0.318023	57
BANP	-0.202267	-0.453271	0.314022	0.394599	0.608199	0.59441	0.0230709	-0.215711	-0.490635	-0.486272	8
BAP1	-1.01947	-1.20583	0.0793475	0.0637416	0.0564658	0.145673	-0.363466	-0.351728	0.829903	0.748515	18
BARD1	-0.554704	-0.457011	-0.325691	-0.350756	0.294613	0.392087	-0.0834651	-0.100724	0.871687	0.759889	30
BASP1	-0.375137	-0.313553	-0.701793	-0.679428	0.0786044	-0.0254824	1.04739	1.17087	1.51184	1.45733	459
BAX	1.16475	0.919334	-0.181032	-0.106223	-0.240861	-0.0278738	0.157583	0.311266	-0.476428	-0.317237	35
BAZ1A	-1.06336	-0.992344	-1.2051	-1.17591	0.953811	1.03419	0.0269736	-0.0884611	0.405719	0.164932	86
BAZ1B	-0.389211	-0.233431	-0.57454	-0.546438	1.79192	1.73746	0.666372	0.468144	-0.0684199	-0.0832751	194
BAZ2A	-0.317378	-0.324964	-0.803532	-0.760833	1.55268	1.48998	0.656289	0.39708	-0.0254131	-0.110936	32
BAZ2B	-0.645618	-0.36231	-0.172656	-0.309168	0.952477	0.969916	0.335601	0.290199	-0.271009	-0.0965127	31
BBC3	-1.20537	-1.26404	-1.45924	-1.40793	0.218992	0.166332	0.532992	0.401701	0.0235723	-0.0206569	2
BBS2	0.657063	1.13924	0.0215174	0.0545513	-0.188959	-0.134827	0.0758667	-0.103916	0.149235	-0.128679	7
BBS4	0.32398	0.197751	-0.627273	-0.586052	-0.0184226	0.00746004	0.173044	0.336086	0.823603	0.745538	16
BBS7	1.52497	1.3769	0.116868	0.0742479	-0.655503	-0.584718	-0.231552	-0.299339	0.131928	0.0125246	6
BBS9	1.14219	1.1751	0.167048	0.0501176	-0.67599	-0.421009	-0.0561137	-0.174499	0.0149794	-0.0566223	6
BBX	-0.467574	-0.503923	-0.258546	-0.267196	0.0751204	0.209717	-0.0807235	-0.0479172	1.44097	1.30882	49
BCAM	-0.379209	-0.314332	-0.94317	-0.867104	0.0391317	0.00362727	0.866804	1.02257	0.762734	0.958937	68
BCAP29	-1.72888	-1.5033	-1.76446	-1.58352	0.117418	0.074601	0.450614	0.551234	0.267204	0.276348	14
BCAP31	-1.38744	-1.33019	-1.65873	-1.73121	0.136372	0.0892537	0.489271	0.616283	0.148304	0.158102	132
BCAR1	2.29927	2.20918	0.470765	0.377998	-0.281678	-0.311948	-0.0315168	-0.10167	-0.551133	-0.442182	28
BCAR3	2.05632	1.97656	0.240806	0.282526	-0.134194	-0.229863	-0.12925	0.00102165	-0.332203	-0.278432	14
BCAS2	-0.176216	-0.208101	-0.4179	-0.348005	0.813922	0.826769	-0.0644763	-0.206423	0.719319	0.600086	42
BCAS3	2.40642	2.08788	0.366136	0.327214	-0.251042	-0.24797	-0.0347848	-0.200107	-0.584876	-0.336946	9
BCAS4	0.492401	0.709196	0.933246	0.869768	-0.605758	-0.377994	-0.203972	-0.0359794	0.0186843	0.0428798	10
BCAT1	3.20129	2.9094	1.46392	1.18969	-0.0406551	-0.388231	-0.208318	-0.0547345	-0.335569	-0.255256	9
BCAT2	-1.01232	-0.701623	0.0345398	0.344251	0.121133	0.114061	0.108626	0.126347	-1.01847	-0.983829	42
BCCIP	0.0543706	0.196954	1.24152	1.15984	-0.0690161	-0.0196013	-0.219462	-0.228364	0.313338	0.221699	77
BCDIN3D	1.08922	1.17932	0.198547	0.210337	-0.520672	-0.404319	-0.165261	-0.173347	0.0715521	-0.117601	2
BCKDHB	-1.0948	-0.905281	-0.0850839	0.106274	0.130908	0.0791481	0.249865	0.242713	-0.445508	-0.208012	35
BCKDK	-1.01052	-1.04096	-0.268274	0.00406881	0.556942	0.498472	0.537591	0.547274	-0.435646	-0.396676	20
BCL10	3.07048	3.00016	1.51495	1.58332	-0.117751	-0.0807732	-0.187582	-0.165157	-0.681256	-0.606287	18
BCL2	-0.86633	-0.835996	-0.230499	-0.237443	-0.518022	0.160436	-0.00443341	0.538947	0.0357645	0.129456	3
BCL2L1	-0.863845	-0.585818	-0.871231	-0.743575	0.378468	0.364273	0.740245	0.745609	-0.00623282	0.0695093	9
BCL2L11	-0.196958	-0.174095	-0.11412	-0.0334941	0.12533	0.111628	0.0750299	0.308011	0.0161797	0.047095	3
BCL2L12	-0.196391	-0.228681	-0.566712	-0.721493	0.0680527	0.0720635	0.690295	0.87756	0.665128	0.709805	13
BCL2L13	-0.428902	-0.231166	-0.842001	-0.869062	0.487803	0.412618	0.897045	1.01772	-0.0673617	0.0625173	57
BCL3	0.510568	0.484125	0.528185	0.474223	-0.32671	-0.219638	0.0413635	-0.0134116	-0.673373	-0.527181	6
BCL6	-1.6642	-1.40178	0.223226	0.240155	-0.0631525	0.136336	-0.105711	0.0299667	0.169012	0.226722	5
BCL7A	-0.144166	-0.102035	0.183861	0.0195527	0.784555	0.678065	-0.232236	-0.0591721	-0.500753	-0.434679	2
BCL7B	0.200906	0.41862	0.198598	0.215139	0.426493	0.329006	-0.199796	-0.309107	-0.131114	0.0597804	5
BCL7C	-0.521127	-0.516928	0.0618216	0.112078	0.680133	0.674996	-0.271434	-0.345636	0.00554348	-0.0559456	16
BCL9	0.512703	0.350975	1.42752	1.68278	0.0675556	0.118664	-0.171471	-0.165162	-0.419486	-0.361287	7
BCL9L	-0.0949389	-0.0317774	2.18779	2.39834	0.376964	0.181725	-0.113436	-0.0279112	-0.65564	-0.526725	21
BCLAF1	-1.25633	-1.16241	-0.258816	-0.0872311	0.997481	0.9547	-0.0496197	-0.178504	0.134103	0.122662	131
BCLAF3	-1.13923	-1.1504	-0.757325	-0.530409	1.20324	1.32014	0.124371	0.035755	0.155347	0.0569046	8
BCOR	-0.837451	-1.04149	-0.0160285	-0.035508	0.833526	0.889014	-0.00410197	-0.102101	-0.0451963	-0.126288	56
BCORL1	-0.975839	-1.41612	-0.409515	-0.202806	1.19856	1.35246	-0.0531245	-0.242013	0.262707	0.0701508	11
BCR	1.20255	1.11244	-0.120866	-0.103223	-0.52747	-0.490893	0.0103246	0.00161779	-0.03107	-0.085718	50
BCS1L	0.0723316	-0.0666536	-0.678697	-0.569033	0.208115	0.248074	0.499591	0.688537	-0.0926385	0.00290693	35
BDH1	-0.989812	-0.910026	-0.880688	-0.868252	0.439293	0.442634	1.04382	1.06853	-0.0425092	0.0943207	18
BDH2	2.5046	2.51086	1.59773	1.5917	-0.0906212	0.105533	-0.13363	-0.216309	-0.680515	-0.752855	7
BDNF	0.504663	0.798004	0.350044	0.13589	0.060397	0.0453579	0.271314	0.224292	0.139028	0.182325	4
BDP1	-0.672546	-0.671997	-0.196058	-0.1377	0.257912	0.368869	-0.379009	-0.466619	0.965223	0.769075	30
BECN1	1.20518	1.03231	0.263732	0.217643	-0.642509	-0.671659	-0.0200825	-0.0443311	-0.173746	-0.101856	32
BEGAIN	0.310269	0.241506	-0.160292	-0.0869844	-0.257206	-0.220536	0.20407	0.274206	-0.023675	0.0686222	33
BEND3	-0.491829	-0.585126	-0.231086	-0.274038	1.07683	1.09064	0.388985	0.32679	-0.161132	-0.174197	41
BET1	-0.835995	-0.713779	-1.00334	-0.927277	0.044163	-0.00343326	0.50161	0.593029	0.646531	0.645964	22
BET1L	-1.22761	-1.00115	-1.7565	-1.60678	0.0536382	-0.0268511	0.849453	0.956861	0.508543	0.646541	8
BFAR	-0.334061	-0.111208	-1.02973	-1.12403	0.0495343	0.143833	0.366628	0.497506	0.0563809	0.17922	7
BGN	-0.733574	-0.454717	-0.146605	-0.180885	-0.113742	-0.265397	0.382239	0.352782	0.056256	0.269657	3
BHLHA15	0.379648	-0.21321	-0.263162	0.333642	1.00123	1.1639	-0.374623	-0.294371	-0.521254	0.295117	1
BHLHE40	-1.50813	-1.29495	-0.108742	-0.0375754	0.0260106	0.101572	0.0174911	0.0540359	0.0583304	-0.0630258	4
BHMT	0.840437	0.96921	-0.918744	-0.674488	0.0855756	0.061009	0.346973	0.242277	-1.42998	-1.12086	1
BICC1	0.805159	0.862039	-0.139985	-0.097873	-0.55256	-0.588955	-0.0745637	-0.0565451	0.0101651	0.0785571	6
BICD1	0.742826	0.645811	0.699423	0.701586	-0.403896	-0.321298	-0.0559932	-0.0575872	-0.172147	-0.0989763	39
BICD2	1.68747	1.53446	1.05336	1.09201	-0.185981	-0.246248	-0.0714552	-0.0422855	-0.446898	-0.306472	60
BICRA	1.15592	1.11515	0.504468	0.362415	-0.0875142	-0.837845	-0.553844	-0.89355	0.0160976	0.0712474	1
BICRAL	-0.432064	-0.0202326	0.0864225	0.146259	1.10007	1.1358	-0.0915999	-0.456903	-0.125112	0.109384	1
BID	1.72894	1.64376	0.281227	0.263813	-0.348842	-0.283358	0.026018	-0.00169658	-0.303337	-0.224508	23
BIN1	2.71795	2.57357	1.04295	1.05284	-0.140617	-0.389359	-0.162665	-0.169782	-0.298415	-0.328801	39
BIN3	1.66137	1.44658	0.194353	0.276784	-0.20849	-0.295652	-0.0391884	-0.0514055	-0.348615	-0.203358	18
BIRC2	2.02741	2.02435	0.409942	0.433506	-0.586153	-0.407161	-0.0494174	-0.0489904	-0.424085	-0.205525	16
BIRC5	0.187372	0.133385	-0.2965	-0.108365	0.621782	0.555619	0.0600624	0.0521148	-0.148135	-0.219699	11
BIRC6	1.6573	1.54584	-0.15865	-0.167546	-0.605928	-0.615687	-0.0979583	-0.106112	0.129525	0.0757034	122
BLM	-0.522777	-0.708323	-0.682287	-0.656529	0.553484	0.72366	-0.0536947	-0.144814	1.0491	0.772894	53
BLMH	2.55444	2.26699	0.935834	0.933013	-0.421592	-0.427548	-0.195326	-0.049987	-0.140501	-0.149871	53
BLOC1S1	0.119506	-0.00726016	-0.232302	-0.232115	-0.61585	-0.576421	0.312143	0.320477	0.773501	0.701158	7
BLOC1S2	0.542234	0.311057	-0.204368	-0.146762	-0.815427	-0.70254	-0.13635	-0.0292201	0.359547	0.248577	12
BLOC1S3	1.08728	0.898175	0.841315	0.742046	-0.20998	-0.297431	-0.206939	-0.0263482	-0.0999653	0.0272482	4
BLOC1S4	1.18742	1.20804	0.967793	0.747129	-0.300495	-0.351159	-0.10714	-0.142677	-0.169315	-0.023554	5
BLOC1S5	1.75226	1.64017	1.38984	1.43729	-0.240119	-0.392601	-0.243819	-0.09485	-0.107692	-0.129709	7
BLOC1S6	1.04477	0.947399	0.523809	0.423771	-0.136261	-0.261457	-0.0723932	0.0299488	-0.105089	-0.0129189	9
BLVRA	2.59335	2.52958	1.69378	1.51429	-0.0603007	-0.143528	-0.0960909	-0.183207	-0.352661	-0.280389	25
BLVRB	2.3145	1.90433	0.816616	0.774647	-0.0993985	-0.102248	-0.157749	-0.193178	-0.410737	-0.355931	32
BLZF1	-0.421466	-0.164469	-0.318805	-0.317407	0.14042	0.066481	0.861939	0.837343	0.0719802	0.0463446	12
BMP1	-0.817336	-0.936068	-0.00770687	0.070947	-0.0754623	-0.0583482	0.184233	0.110452	0.0200633	0.0420908	27
BMP10	2.38345	2.58921	0.91773	0.736734	0.0943987	-0.0326322	-0.0954894	-0.203159	-0.227617	-0.283012	1
BMP2	-0.301478	-0.460037	0.024562	0.168197	-0.00233252	-0.105917	0.0259896	0.150731	0.0246156	-0.0542949	2
BMP2K	-0.0224687	-0.282747	-0.629092	-0.653481	0.088859	-0.020792	0.524107	0.624747	0.338291	0.290289	17
BMP6	-0.705087	-0.927328	0.326229	0.450015	-0.0543663	-0.217269	0.457406	0.38959	0.0895037	-0.00215861	9
BMPR1A	-1.2088	-0.979373	-1.33244	-1.09117	0.0300489	0.0605065	0.692831	0.895402	0.509193	0.67598	10
BMPR2	0.133021	-0.0176543	-0.872934	-0.539509	-0.0338933	-0.0363946	0.582406	0.626375	0.558305	0.681549	16
BMS1	-0.789264	-0.710625	-0.943467	-1.01431	1.1202	1.14815	0.0402792	-0.122027	0.370856	0.221636	103
BMT2	1.83857	1.77607	0.456569	0.668033	-0.0134203	-0.0450868	-0.506596	-0.331423	-1.53033	-0.866649	3
BNC2	-0.531821	-0.340656	-0.0471037	-0.088414	1.21821	1.31833	0.282592	-0.0137063	-0.498909	-0.650614	10
BNIP1	-0.714992	-0.871626	-1.50178	-1.20796	0.115623	0.121097	0.443304	0.545001	0.287974	0.196565	17
BNIP2	1.59262	1.52389	0.0157217	-0.0892455	-0.663172	-0.827673	-0.0602592	-0.114989	0.0433299	-0.167248	10
BNIP3	-1.20875	-0.861259	-0.469635	-0.649204	0.455959	0.440584	1.1501	1.16624	-0.128144	0.110185	6
BNIP3L	-1.27986	-0.541143	-1.38175	-1.20906	0.33996	0.324306	0.902022	1.03739	-0.0647365	-0.058917	8
BOD1	1.55747	1.41752	0.780049	0.67232	0.0928152	0.00572653	-0.321622	-0.680119	-0.609001	-0.657093	6
BOD1L1	-0.372238	-0.324695	1.67436	1.74363	0.737659	0.813072	-0.198697	-0.272789	-0.118724	-0.07817	228
BOK	-0.0912885	-0.28566	-0.619749	-0.45317	0.315812	0.214846	0.359211	0.44922	0.00176722	0.0411556	5
BOLA1	1.29067	1.57776	0.312824	0.414742	-0.0243393	-0.048273	0.00609058	-0.270811	-1.26421	-1.23599	7
BOLA3	-2.00334	-1.9466	0.0209955	0.363162	0.158823	0.14373	0.116446	0.0551126	-1.6267	-1.45242	9
BOP1	-0.697645	-0.765651	-0.0370561	-0.0379861	0.874085	0.824286	-0.107858	-0.239814	0.0686447	0.00125737	92
BORA	2.1489	2.11711	1.35502	1.37716	-0.177666	-0.0717239	-0.00294653	0.000811964	-0.491808	-0.526529	3
BORCS5	0.0831728	0.0382316	-0.25813	-0.251972	-0.331118	-0.139298	0.503853	0.594314	1.08891	1.07726	23
BORCS6	-0.0800261	-0.198478	-0.308499	-0.215764	-0.316648	-0.240548	0.658175	0.897521	1.23254	1.05461	24
BPGM	1.17816	1.28395	0.634418	0.850884	-0.198331	-0.287256	-0.136562	-0.171238	-0.496045	-0.681946	13
BPHL	-1.21718	-1.29264	0.187393	0.419288	0.103976	0.0489781	0.104182	0.0507018	-1.5077	-1.69759	17
BPIFA1	0.336291	0.567459	0.0264008	-0.010205	-0.319601	0.0975625	-0.0119085	1.56939	-0.539309	0.144671	2
BPNT1	1.89726	1.76782	0.5488	0.328951	-0.32804	-0.383457	0.00739516	-0.0426662	-0.214714	-0.312065	46
BPTF	-0.882915	-0.804996	0.251488	0.27704	0.931147	0.964008	-0.033831	-0.123835	-0.153289	-0.220012	144
BRAF	2.65151	2.44031	0.542659	0.579523	-0.406127	-0.0917193	-0.228112	-0.0157826	-0.063106	-0.0878064	3
BRAP	1.57748	1.47256	0.91711	0.782267	-0.238217	-0.284291	-0.0778789	-0.0475676	-0.275102	-0.344831	47
BRAT1	0.447647	0.346075	-0.0210418	-0.126454	-0.560303	-0.605306	0.0670894	0.0468584	0.00920549	-0.0105227	65
BRCA1	-0.762187	-0.85719	-0.00430588	0.0415429	0.116164	0.193788	-0.356235	-0.311496	0.505923	0.329725	79
BRCA2	-0.0601404	0.0136	-0.00380338	0.0219927	0.105385	0.18794	-0.351166	-0.316052	0.132392	0.066303	33
BRCC3	0.634453	0.907338	0.195929	0.206853	-0.165451	-0.207946	-0.34843	-0.314676	0.0664359	-0.00419351	31
BRD1	0.0184083	0.0782912	-0.513108	-0.577404	1.47798	1.34918	0.449994	0.282941	-0.144108	-0.0567082	27
BRD2	-0.708842	-0.706954	0.922723	0.914773	1.12748	1.21603	-0.0227902	-0.12599	-0.689793	-0.730672	47
BRD3	-0.544367	-0.581017	1.14568	1.27233	1.19354	1.12718	-0.0357995	-0.172684	-0.76099	-0.653184	46
BRD4	-0.491144	-0.554575	0.952677	1.05047	1.30144	1.31964	4.06065e-05	-0.149749	-0.888188	-0.735271	65
BRD7	-0.343277	-0.248949	-0.462159	-0.542069	0.96658	1.02324	0.00787953	-0.153315	0.249963	0.100957	54
BRD8	-0.501773	-0.51783	0.893333	0.940854	0.510576	0.560455	-0.185725	-0.305499	0.000816824	-0.110661	42
BRD9	-1.07264	-1.15576	-0.222455	-0.0890778	0.135805	0.216123	-0.185591	-0.0038721	0.204858	0.243373	22
BRF1	-0.242032	-0.225123	0.209362	0.131761	-0.248969	-0.301584	0.0632405	0.166004	-0.00206365	0.058813	23
BRF2	-0.121576	-0.949904	0.0842761	-0.150109	-0.512043	-0.608809	0.428625	0.298132	0.309343	0.206998	3
BRI3BP	-1.8013	-1.4407	-1.80132	-2.01194	0.483214	0.478241	0.612812	0.660782	-0.0658493	0.0772744	8
BRIP1	-0.326645	-0.294339	0.708953	0.77296	-0.146881	-0.0628488	-0.0122452	0.0362264	0.0715529	0.0568526	45
BRIX1	-0.388046	-0.399609	-0.819314	-1.02134	1.26018	1.31319	0.102397	-0.0663203	0.208594	0.0833792	71
BRK1	1.04034	0.883239	-0.293791	-0.298518	-0.560131	-0.413253	-0.0826484	-0.0491406	0.424001	0.411401	19
BRMS1	-0.281401	-0.449143	-0.28086	-0.188154	0.556679	0.608344	-0.0945602	-0.158344	0.335135	0.126996	16
BRMS1L	-0.617463	-0.722551	-0.185815	-0.153135	0.601064	0.719809	-0.33532	-0.25073	0.45966	0.331585	17
BROX	1.97162	1.86129	0.89461	0.807258	-0.270671	-0.367975	-0.0124923	-0.0563399	-0.220629	-0.187903	27
BRPF1	-0.164568	-0.234444	-0.372759	-0.468034	1.34443	1.27528	0.307157	0.248319	-0.0303429	-0.108401	27
BRPF3	-0.0463527	0.0611272	-0.299797	-0.075735	1.09625	1.0442	0.0703513	0.00132155	-0.30057	-0.159597	14
BRWD1	-0.590185	-0.390621	-0.643624	-0.696156	1.78379	1.7272	0.941424	0.792971	-0.0646992	0.0272398	16
BRWD3	0.316699	0.230475	-0.200213	0.0886167	0.386713	0.56922	-0.439972	-0.309338	-0.156416	-0.215617	5
BSCL2	0.0371068	-0.0602807	-0.336957	-0.456277	0.0899412	0.0893711	0.159045	0.407866	0.0295534	0.024973	4
BSDC1	1.17923	1.15296	0.197182	0.08794	-0.594107	-0.670851	-0.112515	-0.157407	0.0160376	-0.0330878	23
BSG	-0.423497	-0.475241	-0.731754	-0.736168	0.0555277	0.0382543	0.668183	0.788678	0.391804	0.422762	220
BST2	-0.341047	-0.386143	-0.800744	-0.553454	-0.0595894	0.0504328	0.629215	0.660273	0.635401	0.689521	42
BTAF1	-0.829622	-0.651369	0.289714	0.23728	0.111747	0.160921	0.00682729	0.00500464	-0.23595	-0.180317	107
BTBD1	0.234279	-0.021131	-0.227833	-0.0964746	-0.286601	-0.16548	0.0331712	0.293148	0.783555	1.00487	15
BTBD10	0.69559	0.710689	0.175558	0.199387	-0.662488	-0.905979	-0.661995	-0.76886	0.052926	0.0344191	1
BTBD2	0.142379	-0.0469256	-0.26185	-0.211411	-0.0743436	-0.0880604	0.0448965	-0.0552475	0.855191	0.681514	6
BTBD3	-0.0959077	-0.140048	-0.235012	-0.183947	-0.220706	-0.0930435	0.0665578	0.363045	0.471324	0.528837	16
BTBD6	1.24834	2.02735	2.6135	2.61984	0.0532185	0.0447574	-0.737306	-0.335008	0.120398	-0.0330534	3
BTBD7	0.776307	0.929532	0.299883	0.136183	-0.700265	-0.331741	-0.147111	-0.0213546	-0.216869	-0.582639	3
BTBD9	0.236703	0.0648469	-0.223632	-0.234877	-0.191492	-0.0324528	0.0259466	0.164788	0.174633	0.244017	8
BTD	-0.497132	-0.568539	0.966971	1.20864	0.093953	-0.0209575	0.186433	0.117551	-0.178636	-0.232539	18
BTF3	1.49312	1.45348	1.41538	1.4334	-0.0548369	-0.195158	-0.154291	-0.138239	-0.43357	-0.462134	53
BTF3L4	1.67247	1.74027	1.52025	1.36653	-0.0734607	-0.119413	-0.170424	-0.0783262	-0.512868	-0.459975	57
BTG3	-1.09468	-1.03789	0.14608	-0.0065735	-0.496278	-0.485426	0.0526904	-0.0512849	0.245365	0.129388	6
BTN2A1	0.225173	0.112333	-0.888281	-0.459187	0.0157041	0.0311744	0.436345	0.427985	0.0969709	0.323918	19
BTN3A1	1.14451	1.34381	-0.590738	-0.730275	-0.496304	0.0693454	0.416108	0.441067	-0.188476	0.062479	2
BTN3A2	0.196936	0.108684	-1.25517	-1.14316	0.00853896	-0.0971047	0.669261	0.677976	0.29355	0.449481	7
BTN3A3	-0.929658	-1.46253	-1.53174	-1.40952	0.104675	0.0654171	0.695538	0.643537	0.322361	0.693502	4
BTRC	-0.361363	0.205163	-0.451044	-0.152225	0.0605045	-0.0215194	0.178546	-0.00250488	0.637382	0.252186	2
BUB1	0.679876	0.473961	0.543435	0.446074	-0.230878	-0.172813	-0.0302432	-0.0326527	-0.322405	-0.388771	20
BUB1B	2.42797	2.32075	0.242311	0.145898	-0.391404	-0.596022	-0.0275032	-0.0620634	-0.440012	-0.39822	61
BUB3	0.325124	0.272876	1.51657	1.67927	0.0371289	0.0903412	-0.353578	-0.145274	-0.0395418	-0.0747098	81
BUD13	-0.414802	-0.395094	-0.532377	-0.454702	0.897179	0.968486	-0.0084421	-0.181137	0.50748	0.282392	33
BUD23	-0.0835025	-0.0946883	0.660246	0.683732	-0.158081	0.00498861	-0.124109	-0.085736	0.632442	0.561402	38
BUD31	0.182076	-0.0417527	0.764508	0.836984	0.98451	0.894108	-0.195573	-0.323687	-0.265923	-0.338174	15
BYSL	-0.359878	-0.390565	-0.833829	-0.815948	0.558294	0.554663	-0.00622314	-0.0779552	0.232729	0.173043	68
BZW1	2.04222	2.01333	0.873248	0.809998	-0.269392	-0.327636	-0.0910739	-0.0926414	-0.378436	-0.34921	122
BZW2	2.27307	2.2026	0.532109	0.425491	-0.376093	-0.429261	-0.0839501	-0.0548203	-0.399504	-0.342949	85
C10orf76	0.78503	0.813433	0.16264	0.0028634	-0.364249	-0.510944	0.0693644	-0.0643488	-0.318425	-0.489503	28
C10orf88	1.06619	1.11764	0.150905	0.0614905	-0.248019	-0.476576	0.0532706	0.28743	-0.192467	-0.0153265	6
C11orf49	0.808456	0.627937	-0.0660487	0.0668908	-0.103427	-0.224331	0.0877227	0.0639635	-0.0114901	-0.24018	9
C11orf54	3.22575	3.13972	1.81194	1.65892	-0.103934	-0.193839	-0.0739314	-0.013451	-0.124047	-0.21946	10
C11orf58	0.673937	0.920062	2.27524	2.19387	0.136338	-0.0344821	-0.343601	-0.349288	-0.936586	-0.622672	37
C11orf68	2.01783	1.91613	1.12282	0.815649	-0.316079	-0.486701	-0.211629	-0.0855187	-0.775891	-0.522097	11
C11orf74	1.49765	1.48014	0.189786	0.263991	-0.204389	-0.187629	0.138135	-0.169286	-0.389545	-0.41197	2
C11orf98	-0.852746	-0.928785	-0.233111	-0.376774	0.061446	0.153729	-0.088045	0.00233748	1.98626	1.90222	10
C12orf10	2.15336	2.06223	1.60719	1.57017	0.0287071	0.0106865	-0.15655	-0.186431	-0.467152	-0.385745	53
C12orf29	1.84666	2.10516	1.24293	1.09633	-0.290497	-0.0619451	-0.0995634	-0.156806	-0.279497	-0.156756	13
C12orf4	1.02593	0.999526	0.544917	0.463263	-0.629897	-0.609505	-0.0910886	-0.0923026	-0.152749	-0.155778	9
C12orf43	-0.967743	-0.91816	1.20461	1.29372	0.644447	0.740073	-0.0639917	-0.122966	-0.150369	-0.135589	28
C12orf45	0.645261	0.705987	1.40564	1.44077	-0.105534	-0.133776	-0.169648	-0.127228	-0.12731	-0.179558	7
C12orf49	0.90742	0.797526	-0.545667	0.0713968	-0.172381	-0.0504308	0.171174	0.413699	-0.0501156	-0.371215	2
C12orf57	2.84731	2.87778	0.78104	0.682654	-0.257997	-0.187645	-0.251419	-0.466504	0.0874048	-0.128795	11
C12orf65	-0.513019	-0.539525	-0.805796	-0.368372	0.147081	0.179539	0.187233	0.105306	-0.0082012	0.055547	6
C12orf66	0.535763	0.445351	0.354234	0.265792	-0.501041	-0.872741	-0.147496	-0.211591	0.194173	0.00153258	5
C12orf73	-1.60811	-1.55673	-1.05057	-0.926603	0.594364	0.782781	0.954538	0.738697	0.098574	-0.0570787	4
C12orf75	-0.574016	0.253869	-1.55451	-1.26592	-0.217702	-0.20119	0.867686	0.554554	0.930716	0.98183	2
C14orf119	4.2678	4.17112	1.13609	0.981559	-0.144256	-0.34516	0.107674	-0.5242	-0.134024	-0.6904	1
C14orf93	-0.0923267	-0.562414	-0.373048	-0.146838	1.41043	1.5516	0.0948335	0.593342	0.053942	0.0208358	1
C15orf39	-0.178695	-0.0680696	0.408657	0.51602	-0.139628	0.033463	0.0719431	0.192235	-0.319954	-0.0139453	14
C15orf40	1.98901	1.86713	1.01785	1.05087	-0.178319	-0.279016	-0.0235543	-0.10915	-0.785293	-0.7808	10
C15orf41	1.69349	1.55261	-0.00724612	0.173148	-0.338013	-0.226242	0.0290733	-0.0818611	-0.204577	-0.305473	6
C15orf61	-0.00581797	0.045182	-0.955958	-0.707917	-0.0599799	0.232067	0.210802	0.633925	0.0303938	0.276744	2
C16orf45	-2.06431	-1.33929	-1.71387	-2.11	-0.00736751	0.153952	1.02733	0.706481	0.497232	0.824858	1
C16orf58	-0.754138	-0.83961	-1.19553	-0.805575	0.111809	0.0924975	0.388406	0.478771	0.200127	0.140675	25
C16orf70	1.73458	1.62187	0.208764	0.151827	-0.23827	-0.333157	-0.0819921	-0.0174692	-0.26177	-0.214146	10
C16orf72	-0.416304	-0.478599	0.555808	0.59178	-0.366019	-0.295612	-0.09691	0.0584056	0.179615	0.351451	8
C16orf87	-1.16488	-1.09802	1.70223	1.70201	-0.129462	-0.2377	-0.183423	0.0224763	0.353201	0.168594	2
C16orf91	-0.647114	-0.454751	-1.0933	-0.841995	0.310973	0.514776	0.999215	0.921968	0.0209886	0.0583862	13
C17orf49	-1.14366	-0.55747	0.0104093	-0.155537	0.912309	0.867229	-0.043064	-0.0836474	0.0784303	-0.170876	5
C17orf53	1.69667	1.68295	1.1234	1.09392	-0.317338	-0.188799	-0.110762	0.0184303	-0.433562	-0.307668	1
C17orf62	-0.590646	-0.713245	-1.03776	-1.03835	0.159246	0.0895989	0.436124	0.507987	0.15801	0.0134429	6
C17orf75	-0.259626	-0.0348531	0.228082	0.128887	-0.565315	-0.633683	-0.0830041	0.0129597	0.348671	0.281059	30
C17orf80	-0.458767	-0.615232	-0.640211	-0.483777	0.626058	0.668338	0.961186	1.0645	-0.049705	0.0773965	15
C17orf97	0.640141	0.757049	-0.184631	-0.163333	-0.437402	-1.14687	-0.316541	-0.464744	0.817041	0.682523	4
C18orf21	-1.20665	-0.864535	-1.14538	-0.883644	0.649074	0.581144	-0.061106	-0.0289665	1.0305	0.930583	7
C18orf25	0.413478	0.358278	2.37251	2.47747	0.117156	0.128418	-0.341925	-0.189585	-0.702667	-0.641229	29
C18orf32	-1.03697	-1.46071	-0.973772	-1.10716	0.10881	0.0513496	0.505097	0.3977	0.346377	0.192896	5
C19orf25	-1.35719	-0.85748	-0.703312	-0.799326	0.111641	0.0265424	0.194043	0.0829786	0.151561	0.150179	8
C19orf33	1.65824	1.63457	1.7933	1.90474	-0.0787007	0.0287042	-0.128237	-0.0347653	-0.313974	-0.636589	3
C19orf47	-0.518161	-0.586769	-0.314438	-0.336226	1.11668	1.13764	0.218502	-0.00560894	0.118659	-0.0586901	13
C19orf53	-0.780202	-1.00942	-0.386424	-0.163781	-0.0153947	0.0955412	0.0140333	0.144505	1.7625	1.76747	14
C19orf54	2.44472	2.16545	0.877897	0.967962	-0.101571	0.0715173	-0.238317	-0.0161736	-0.358808	0.020647	1
C19orf57	0.952318	1.08407	1.17199	1.46199	-0.509665	-0.473792	-0.0122699	-0.0800617	-0.836704	-0.58204	1
C19orf66	0.546692	0.487383	-0.121792	-0.280759	-0.380283	-0.400653	-0.196409	-0.193573	0.864404	0.782011	7
C19orf70	-0.760509	-0.826027	-1.52159	-1.46061	1.04464	0.865467	1.32757	1.15984	-0.0935087	0.0866684	17
C1D	0.143406	0.0862213	-0.405983	-0.529311	0.385461	0.455873	-0.142744	-0.0406697	1.26595	0.899577	4
C1GALT1	-0.727828	-0.67041	-1.14239	-1.0678	0.0926923	0.0232373	0.98074	1.03105	0.797445	0.842222	23
C1GALT1C1	-0.71055	-0.671715	-1.12288	-1.28097	0.11161	-0.0141062	0.761294	0.832133	0.541049	0.60967	17
C1QB	-1.96694	-1.43068	-2.74203	-3.11599	0.172557	-0.0259724	0.700771	0.773851	0.44401	0.266331	1
C1QBP	-1.01419	-1.04631	-0.11573	0.154185	0.103773	0.108049	0.147416	0.131563	-1.19007	-1.0439	207
C1QL1	-1.68151	-1.83408	-0.995488	-0.543402	0.206718	-0.0601331	0.595495	0.781812	0.600995	0.535589	1
C1QTNF1	-0.299857	-0.455046	-0.108737	0.36803	0.0803708	-0.0681684	0.485163	0.0779157	-0.20121	-0.0298882	3
C1QTNF6	-0.0602842	-0.0118254	0.0888664	0.208014	0.0506767	0.0707108	0.294939	0.360213	-0.451911	-0.466765	6
C1R	-0.221444	0.0803719	0.339104	0.235116	-0.0417317	-0.326725	0.229491	0.173541	-0.164769	0.0268536	4
C1S	0.130746	-0.0177881	0.271974	0.466451	-0.154911	-0.222093	0.210747	0.229522	-0.0256543	0.131892	5
C1orf109	1.30685	1.04598	-0.281705	-0.185067	-0.528738	-0.694712	-0.0456866	0.0209882	0.522039	0.220324	11
C1orf112	0.131101	-0.0993442	0.164454	0.209439	-0.497483	-0.363406	0.0985801	0.146956	-0.0284327	0.0282001	16
C1orf122	1.87574	1.9414	1.99069	2.04053	0.0355783	0.0103995	-0.293587	-0.559676	-0.28781	-0.644407	7
C1orf123	3.49146	3.28813	2.20649	2.05159	-0.0253186	-0.0207306	-0.328451	-0.241382	-0.537176	-0.566292	21
C1orf131	-1.13989	-1.17423	-1.05299	-1.19756	1.10696	1.1377	0.196754	0.0267871	0.111315	0.0678736	13
C1orf159	-1.21145	-1.23466	-0.912738	-0.939006	0.0663535	0.101137	0.706053	0.818741	0.135255	0.306662	4
C1orf174	-0.776811	-0.815988	0.880153	0.863202	0.967658	0.746066	-0.184425	-0.283366	-0.178676	-0.0189709	5
C1orf198	1.70787	1.54601	-0.185195	-0.0683476	-0.214234	-0.170052	0.0795027	0.0526821	-0.246773	-0.17805	19
C1orf21	-0.11494	-0.296747	-0.86665	-0.799543	-0.0126219	-0.0848171	0.431021	0.446251	0.836964	0.908299	12
C1orf226	0.0366333	-0.00543933	-0.391905	-0.470591	-0.253392	-0.111378	0.430536	0.455456	0.166399	0.203674	8
C1orf35	-1.34914	-1.50419	-0.224339	-0.293878	0.498487	0.624117	-0.120998	-0.131657	0.653049	0.306302	12
C1orf43	-1.22258	-1.42507	-1.18258	-1.25545	0.155105	0.0664548	0.417013	0.565378	0.132213	0.142019	9
C1orf50	2.82815	2.84805	1.66064	1.63454	-0.127384	0.0161922	-0.264062	-0.269261	-0.211157	-0.346138	9
C1orf52	0.309413	0.568786	2.07929	1.99969	0.376559	0.125839	-0.541764	-0.315666	-0.72697	-0.753822	11
C20orf24	-1.33669	-1.41031	-1.96994	-1.55473	0.0671002	0.0802651	0.520489	0.600984	0.138259	0.319082	11
C20orf27	2.22239	2.10147	0.715489	0.730655	-0.308038	-0.420528	-0.0253997	-0.1174	-0.549311	-0.35355	10
C21orf2	1.15114	0.949001	0.359393	0.462536	-0.2436	-0.312751	-0.0399869	-0.0714437	-0.00129915	0.0541283	3
C21orf59	1.95246	1.97251	0.642103	0.812321	-0.177064	-0.180063	-0.338137	-0.378548	-0.251755	-0.231541	4
C21orf91	1.23083	1.88847	1.15648	0.835986	-0.111665	-0.384405	-0.0890528	-0.0032788	-0.284757	-0.754777	3
C22orf39	-2.21637	-2.60969	-2.75346	-2.69574	-0.0260291	0.200405	0.393317	0.480079	0.637901	0.485171	2
C2CD2	-0.882768	-0.838242	-1.10043	-0.246953	0.118146	0.0242881	0.525191	0.727676	0.0970375	0.250466	11
C2CD2L	-0.576056	-0.837825	-0.41927	-0.653288	0.0324928	0.116468	0.541904	0.60112	0.110803	0.26706	10
C2CD3	-0.0964561	0.215163	-0.387815	-0.451174	-0.0158059	-0.0366531	0.158637	0.210578	0.528309	0.444225	22
C2CD5	-0.855814	-0.727036	-0.00985041	0.148228	-0.308611	-0.293185	0.238627	0.367253	0.0313158	0.110396	61
C2orf42	-0.381275	-0.181268	-0.537656	-0.449107	0.139689	0.294569	-0.0515336	-0.00708367	1.0343	0.756047	6
C2orf49	-0.0619675	-0.00721681	1.69831	1.87895	0.219919	0.106176	-0.451202	-0.306404	0.0579277	0.0452975	13
C2orf69	1.29094	1.37628	0.751368	0.840364	-0.0489046	-0.0858162	-0.0885734	-0.0967765	-0.787703	-0.817744	14
C2orf76	3.31828	3.28561	0.848362	0.67727	-0.229193	-0.268632	-0.0519298	-0.09375	-0.207109	-0.167052	8
C2orf88	1.54979	1.34934	0.591457	0.371287	-0.519888	-0.559056	-0.0645592	-0.092688	0.0382096	-0.183341	1
C3	-0.277011	-0.226256	0.394703	0.61641	-0.151503	-0.205293	0.200794	0.126061	-0.0257842	0.01194	73
C3orf33	-0.447372	-0.530531	-0.843395	-0.890355	0.610525	0.444607	0.898085	1.02994	-0.0594278	0.0671759	3
C3orf38	1.02586	0.932191	0.27569	0.315966	-0.158513	0.204068	-0.321526	-0.160756	-0.293617	-0.40369	10
C3orf52	0.924995	0.636756	0.000431128	-0.284692	-0.24347	-0.0955807	0.164138	-0.0579741	-0.159351	-0.226993	4
C3orf58	-0.569868	-0.459685	-1.10398	-0.938544	0.0468951	0.0760368	1.01303	1.03409	0.397922	0.445934	30
C3orf80	0.189516	0.299644	-0.824229	-0.939222	-0.265474	0.0867755	0.822241	0.652334	0.280122	0.282903	1
C4BPA	1.21781	0.991155	-0.20277	-0.179614	-0.036858	0.0212426	0.205219	-0.0303293	0.00803544	-0.432931	1
C4orf19	-1.12597	-0.904879	-1.25825	-1.19531	0.183995	-0.0374109	1.01178	1.09628	0.855909	1.1498	3
C4orf3	-1.77432	-1.48985	-2.0218	-1.90953	0.220645	0.101754	0.416502	0.409375	0.0614419	0.193337	4
C4orf46	2.1296	2.07989	0.417263	0.603773	-0.108302	-0.302807	-0.000550384	-0.17503	-0.850535	-0.774765	4
C5	1.5595	1.348	-0.484614	-0.376858	0.425285	0.0155918	0.613314	0.0397518	-0.145486	-0.036372	1
C5AR2	-1.17417	-1.34125	0.184628	-0.669074	0.0204186	-0.393664	0.820615	-0.01793	0.0798523	0.765517	1
C5orf15	-1.21081	-1.01742	-1.39882	-1.01985	0.115824	0.0307603	0.929222	0.96379	0.954802	1.0193	8
C5orf22	0.768354	0.874865	2.01827	1.94986	-0.00627999	0.0535354	-0.250379	-0.13983	-0.351816	-0.479497	21
C5orf24	-0.914161	-1.07077	-0.575639	-0.40312	2.19155	2.1196	1.15026	0.835385	0.0241912	0.0465677	12
C5orf30	0.304107	0.222577	0.268953	0.290629	-0.34084	-0.183728	-0.0940995	-0.291917	0.144331	0.00742932	8
C5orf34	1.42521	1.39793	0.0210452	0.13964	-0.0742855	-0.100863	-0.00528972	-0.0235025	-0.25282	-0.268533	7
C5orf42	0.574872	0.38002	-0.547263	-0.486011	-0.694282	-0.505172	0.0473457	0.0535268	0.36489	0.195879	15
C5orf51	1.6933	1.66918	0.239246	-0.0855017	-0.776517	-0.797906	-0.0297697	-0.0644649	-0.000418269	-0.242156	28
C6orf106	1.43713	1.59267	0.526494	0.517551	-0.24608	-0.386853	-0.0437578	-0.12083	-0.558395	-0.299659	12
C6orf120	-0.156259	-0.0887172	-0.873164	-0.647676	0.0124438	0.0187207	0.270177	0.483726	0.0413681	0.191853	8
C6orf136	0.731172	0.847768	-0.304324	-0.662334	0.325728	0.172199	0.220929	-0.116856	-0.638054	-0.148275	1
C6orf203	-2.40647	-2.48876	-0.0278637	0.328352	0.0854256	0.0882652	0.160238	0.0587172	-1.66286	-1.54324	7
C6orf47	-1.76746	-1.93954	-1.67721	-1.41437	0.0856029	0.0609816	0.510463	0.422212	0.761572	0.673423	4
C6orf62	0.803027	1.01551	0.567187	0.393376	-0.154701	-0.140585	0.117901	-0.210232	-0.386645	-0.12969	1
C6orf89	-0.130453	-0.159203	-0.967134	-1.16915	0.0847825	0.0754706	0.510844	0.517316	0.329974	0.283621	7
C7orf25	1.67194	1.29688	0.185433	0.156021	-0.438915	-0.455122	-0.0219748	-0.0015781	-0.0703988	-0.158563	12
C7orf26	-0.548235	-0.933637	-0.0530081	-0.21112	0.656785	0.648852	-0.135275	-0.236876	0.211927	0.435134	8
C7orf43	0.174143	0.243273	-0.330242	-0.218231	-0.43589	-0.539514	0.0681311	-0.0380029	0.56252	0.47461	4
C7orf50	0.154076	0.27769	-0.368434	-0.390215	-0.145606	0.0174963	-0.105215	0.0045703	1.69266	1.65073	51
C8orf33	0.612112	0.642586	-0.792227	-0.609593	-0.153822	-0.223401	-0.104821	-0.0565876	1.83599	1.70312	24
C8orf37	1.40716	1.46258	0.687758	0.967385	-0.178728	0.187448	-0.135684	-0.0916951	-0.327455	0.0751954	3
C8orf59	0.0780669	-0.165136	0.836183	0.831981	-0.0501567	-0.0876117	-0.249672	-0.233753	0.609453	0.457097	7
C8orf82	-0.808721	-1.24501	0.0605248	0.433266	0.127115	0.228275	0.150405	0.156124	-1.10822	-1.17222	10
C9	1.38831	1.38478	-0.568754	-0.532358	0.000803015	-0.452105	0.575726	0.445111	0.0676675	-0.0174939	1
C9orf16	1.63975	1.87581	0.765917	0.311938	-0.119188	0.0445896	-0.12276	0.0662585	-0.333362	0.312968	2
C9orf40	0.728593	0.565778	0.304784	0.0584476	-0.12064	-0.373315	-0.233389	-0.0616721	-0.142417	0.146997	8
C9orf64	2.82576	2.64298	1.64739	1.42206	0.0120549	-0.0593068	-0.338539	-0.264443	-0.720212	-0.538714	50
C9orf72	1.63914	1.57367	0.101412	-0.188493	-0.410985	-0.408396	0.0691601	0.0158488	-0.102479	-0.0643079	10
C9orf78	0.198451	0.321711	1.9192	2.10385	0.193947	0.181905	-0.241477	-0.227668	-0.259477	-0.222015	54
C9orf85	-0.312752	-0.312718	2.02864	2.20181	0.210075	0.181542	-0.248496	-0.182578	-0.0946021	0.0583358	2
CA1	1.95661	0.556436	0.156743	-0.369196	-0.826822	0.45736	-1.27606	-0.42114	-0.952068	3.06725	6
CA12	0.64917	0.746463	0.00631973	0.0735768	-0.326409	-0.216774	-0.0903755	-0.0126311	0.0640258	0.198061	11
CA13	3.13222	2.85119	1.77955	1.52433	0.00484855	-0.191359	-0.389975	-0.347247	-0.382717	-0.186673	11
CA2	2.17442	2.28519	1.2473	1.15357	-0.0826753	-0.0376648	-0.469002	-0.174008	-0.514932	-0.219184	54
CA5B	-0.129624	-0.28682	0.564364	0.714262	0.180303	0.0608467	-0.00908235	0.066022	-0.993324	-1.16359	1
CA9	-0.757584	-0.46387	-0.72344	-0.722163	0.137607	-0.0389835	0.73763	0.931886	0.740833	0.757078	4
CAAP1	0.10672	0.0758838	0.499033	0.598748	0.544535	0.593338	-0.178523	-0.325602	-0.133648	-0.154248	25
CAB39	1.87286	1.82006	0.654567	0.615978	-0.553509	-0.590065	-0.148249	-0.0919387	-0.0676895	-0.0634947	61
CAB39L	1.74284	1.58746	0.882729	0.691203	-0.436634	-0.529071	-0.0697792	-0.238199	-0.243849	-0.356705	7
CABIN1	-0.403293	-0.654186	-0.2974	-0.24075	0.934649	0.848142	0.244875	0.0521646	0.0239191	-0.0618284	43
CABLES1	-0.612927	-0.376664	-0.229677	-0.208832	-0.249133	-0.106888	0.480361	0.502396	0.193929	0.284161	10
CABP7	-1.19234	-1.07958	0.447519	0.655595	0.102761	0.0179569	0.503972	0.510586	-0.294252	-0.247114	10
CACHD1	-0.84665	-0.547946	-0.582667	-0.51022	0.0463396	0.0116486	0.926455	0.739482	0.822122	0.880293	17
CACNA2D1	-0.82795	-0.842626	-1.23047	-1.11578	0.0428253	0.0153264	0.833066	0.994058	0.982593	1.05228	116
CACNA2D3	-0.379243	-0.671779	-0.238668	-0.214151	-0.0728591	-0.0636792	0.486045	0.615246	0.198561	0.296739	20
CACNB1	0.44537	0.596737	0.339466	0.444079	-0.558462	-0.0128245	-0.756462	-0.258484	-0.330443	0.937507	1
CACNB3	0.985159	0.81798	0.569943	0.66719	-0.493157	-0.324951	-0.0856192	-0.100242	-0.160071	0.0513132	6
CACTIN	-0.4314	-0.327344	1.0444	1.11873	0.493998	0.643935	-0.116031	-0.0861305	-0.364865	-0.323098	36
CACUL1	0.191114	0.171709	0.730987	0.643274	-0.0428948	-0.148709	-0.0629413	0.0773125	-0.115356	-0.168427	15
CACYBP	2.26951	2.16319	0.753303	0.734096	-0.350091	-0.355837	-0.0887953	-0.0445111	-0.372117	-0.379904	114
CAD	1.89655	1.72701	0.056808	-0.0669156	-0.499144	-0.469481	-0.222659	-0.268503	0.208175	0.0230796	270
CADM1	0.00101691	-0.126406	-1.20506	-1.21014	0.0506195	0.0310341	0.741068	0.81843	0.133613	0.188271	18
CADM4	-0.705267	-0.817733	-1.0238	-0.908139	0.0332911	0.073588	0.669794	0.656471	0.316997	0.521396	9
CALCOCO1	2.0516	1.92961	0.489091	0.477026	-0.243061	-0.312229	-0.0697169	-0.0457229	-0.497061	-0.460541	11
CALCOCO2	1.11887	0.900613	0.565551	0.637135	-0.472045	-0.359639	-0.14746	0.0663604	-0.545503	-0.390892	36
CALD1	1.39833	1.4525	2.02648	2.05657	-0.0198244	-0.0533029	-0.1752	-0.137407	-0.544747	-0.470823	204
CALHM2	-0.277851	-0.735678	-0.899879	-0.669435	0.419189	0.330674	0.567053	0.613495	0.17573	0.133216	2
CALML3	0.317744	0.24754	-0.138981	-0.109517	-0.0823316	-0.228917	0.0165617	-0.143296	-0.13953	0.389196	7
CALML5	1.38912	-0.435531	0.337944	-0.759402	0.195875	-0.287178	0.24076	0.146064	-0.127404	-0.453586	1
CALR	-0.712233	-0.711646	0.957904	1.22457	0.0794462	0.0388671	0.23086	0.214367	-0.595646	-0.597704	773
CALR3	-0.0244046	-0.740828	1.11472	1.22513	0.490479	-0.269643	0.309275	0.595762	-0.424039	-0.34145	1
CALU	-0.410131	-0.350328	0.84887	1.09904	0.0437092	0.0113981	0.248557	0.177086	-0.315811	-0.28439	423
CAMK1	2.6887	2.43074	0.488434	0.53423	-0.187174	-0.189136	-0.0166969	-0.12342	-0.778825	-0.738255	11
CAMK1D	3.02255	2.71613	0.558008	0.542878	-0.219323	-0.271864	-0.0539729	-0.042752	-0.61424	-0.570699	24
CAMK2A	1.76691	1.6506	0.161926	-0.0219903	-0.960977	-0.635678	-0.140467	-0.395244	0.171576	-0.113216	1
CAMK2B	0.309803	0.468635	0.758943	0.500083	-0.614095	-0.49178	-0.260913	-0.191586	0.131934	0.0887626	1
CAMK2D	1.72604	1.63323	0.169778	0.0163061	-0.666911	-0.802682	-0.175814	-0.175575	0.0839463	-0.0601232	31
CAMK2G	1.69769	1.53912	0.175654	0.0480136	-0.588146	-0.513171	-0.0788453	-0.135557	0.0423178	-0.00547831	25
CAMK4	1.42336	1.36763	0.36459	0.10663	-0.581234	-0.681096	-0.0622261	0.0204198	-0.454835	-0.287339	11
CAMKK1	2.43065	2.16632	0.152357	0.212209	-0.20883	-0.106391	-0.102309	-0.0674441	-0.31005	-0.256051	13
CAMKK2	1.65725	1.59364	0.0552534	0.030366	-0.269555	-0.394906	0.0109364	-0.041916	-0.308002	-0.224457	11
CAMKMT	1.5916	1.39204	0.194514	0.0732218	-0.552704	-0.353789	0.00571294	-0.155901	-0.516476	-0.365585	5
CAMLG	-1.42813	-1.08834	-1.55063	-1.386	0.152539	0.072187	0.582355	0.579147	0.278641	0.343061	15
CAMSAP1	1.68345	1.58455	0.611211	0.54246	-0.353105	-0.436008	-0.0933242	-0.170222	-0.20192	-0.231453	77
CAMSAP2	1.67407	1.52614	0.246067	0.140978	-0.561078	-0.514928	-0.0263886	-0.0604951	-0.0495098	-0.145756	64
CAMSAP3	0.399067	0.317081	-0.0166506	0.0527274	-0.447934	-0.541508	0.224051	0.0295566	-0.248886	-0.306057	5
CAND1	0.904168	0.787008	0.417292	0.368601	-0.688378	-0.632223	-0.11411	0.00218941	-0.199945	-0.142781	217
CAND2	0.715734	0.433111	-0.122149	-0.208694	-0.570948	-0.124787	-0.00553359	0.118982	-0.154162	0.0494763	5
CANT1	-0.449193	-0.524065	-0.800683	-0.927094	0.057979	0.0201402	0.830132	0.901733	0.466275	0.525431	30
CANX	-0.960843	-0.932239	-1.37226	-1.28443	0.111894	0.0999219	0.567615	0.653492	0.154351	0.14182	543
CAP1	2.68992	2.57662	0.654296	0.654245	-0.446263	-0.385041	-0.139296	-0.0684666	-0.179666	-0.211361	191
CAP2	2.55295	2.46435	0.604704	0.533505	-0.366951	-0.260985	-0.0878014	-0.0354024	-0.321359	-0.361814	30
CAPG	1.71411	1.60226	0.484321	0.622006	-0.4668	-0.273403	-0.0718119	-0.0948045	-0.212954	-0.212192	65
CAPN1	2.28899	2.17779	0.594499	0.572474	-0.325149	-0.318253	-0.13192	-0.0600652	-0.225767	-0.379503	105
CAPN15	0.894965	0.850238	0.383489	0.416664	-0.543292	-0.301662	-0.0880433	-0.0805082	-0.145478	-0.0234867	11
CAPN2	2.4858	2.30364	0.397249	0.349597	-0.372455	-0.478658	-0.0857617	-0.0607967	-0.32123	-0.28536	109
CAPN7	2.67422	2.44157	0.657294	0.632178	-0.238915	-0.220736	-0.133758	-0.0624434	-0.395455	-0.26933	38
CAPNS1	2.11334	1.78412	0.356275	0.369501	-0.47471	-0.469126	-0.0866375	-0.0166623	-0.619739	-0.480513	56
CAPRIN1	-0.401067	-0.310337	0.792815	0.950458	0.0011607	-0.0378725	-0.284573	-0.150598	0.964876	0.988706	212
CAPRIN2	0.183172	0.250316	0.380022	0.493436	-0.303426	-0.455817	-0.325071	-0.221561	0.247672	0.211295	2
CAPS	3.078	2.97413	1.35722	1.18762	0.0281364	-0.582659	-0.0292271	-0.678893	-0.221521	-0.00375969	1
CAPZA1	1.00139	0.927321	0.101686	0.00821555	-0.203377	-0.237619	-0.0469978	-0.0393208	-0.142145	-0.09333	122
CAPZA2	1.18537	1.18394	0.221278	0.192361	-0.203783	-0.171133	-0.0781486	-0.0367858	-0.101452	-0.103867	61
CAPZB	0.958207	0.877373	0.0678905	0.0130548	-0.216017	-0.225959	-0.0596822	-0.0340463	-0.0269925	-0.098129	192
CARD10	1.21488	1.21195	0.0868998	-0.00928087	-0.289925	-0.378043	-0.0133246	-0.0319897	-0.0218836	-0.231152	6
CARD11	1.35162	1.31685	0.386884	0.643907	0.0489068	0.0918436	-0.114756	-0.0464183	-0.314207	-0.304368	1
CARD19	-0.6288	-0.31519	-0.998118	-1.06241	0.449357	0.384198	0.786281	0.83137	-0.433779	-2.58597e-05	6
CARD6	1.07234	1.07083	-0.10693	-0.233276	-0.315774	-0.400107	0.187584	0.018212	-0.121235	-0.237223	20
CARD8	2.38396	2.1702	0.616035	0.538315	-0.12736	-0.312248	-0.0678418	-0.091099	-0.283397	-0.357693	4
CARHSP1	2.33419	2.1563	1.00005	0.932611	-0.00395991	0.0596275	-0.246563	-0.296415	-0.617196	-0.520767	14
CARM1	0.328455	0.33949	0.335112	0.343741	-0.384822	-0.438097	0.0234336	0.0351491	-0.0196453	-0.00288399	40
CARMIL1	1.48819	1.48163	0.00989701	0.0389969	-0.62443	-0.592492	-0.0363218	-0.0742886	-0.0788409	-0.0544943	74
CARNMT1	0.965803	1.04996	2.17775	2.13378	0.0145934	0.0260348	-0.274267	-0.17343	-0.230492	-0.131551	19
CARS	2.43332	2.25974	1.16336	1.145	-0.174854	-0.295027	-0.173327	-0.176541	-0.142657	-0.170517	129
CARS2	-0.773402	-0.765108	-0.0231038	0.255171	0.171873	0.100415	0.170603	0.0679104	-1.01121	-0.861427	43
CASC3	0.509325	0.552925	-0.74365	-0.688388	-0.232541	-0.494925	0.00993381	-0.058262	1.67713	1.4524	17
CASC4	-1.12335	-1.16037	-1.24677	-1.2207	0.0946908	0.0482496	0.855547	0.901396	0.469121	0.523238	58
CASD1	-0.927834	-0.738981	-1.33988	-1.35433	0.018974	0.127611	0.598648	0.798892	0.520927	0.580393	3
CASK	-1.03584	-0.989078	-0.79227	-0.629404	0.109331	0.0171537	0.638049	0.747884	0.389901	0.493929	61
CASKIN2	0.941622	0.856594	-0.0140543	0.0750164	-0.442075	-0.472281	-0.0316608	0.0392704	-0.0543652	-0.0289562	18
CASP1	1.29799	1.16849	0.445801	0.412729	-0.169684	-0.366954	-0.0349253	-0.0574063	-0.341451	-0.481207	5
CASP10	1.90435	1.56701	-0.00377743	-0.126428	-0.28715	-0.526495	-0.207928	-0.198434	0.12238	-0.0178356	6
CASP14	-0.472788	-0.83499	-0.249888	-0.950691	0.0595618	0.0870227	0.06789	0.0544897	0.644692	0.263517	1
CASP2	0.502504	0.449058	0.691766	0.517985	-0.483969	-0.512111	0.0311511	0.00446876	-0.248141	-0.264855	28
CASP3	2.18449	2.0441	1.25003	1.17884	-0.0314145	-0.20071	-0.236693	-0.119783	-0.361157	-0.206968	28
CASP4	2.23049	2.07892	0.371865	0.575809	-0.126271	-0.221291	-0.0964699	-0.111637	-0.405008	-0.506277	11
CASP6	2.22764	2.03308	1.16366	1.04648	-0.109138	-0.383871	-0.251354	-0.298448	-0.201388	-0.224959	11
CASP7	2.40306	2.20818	1.61427	1.58884	-0.114787	-0.0942449	-0.148033	-0.142406	-0.555762	-0.338259	19
CASP8	1.97234	1.89554	0.771316	0.650365	-0.325526	-0.346964	-0.0631341	-0.0666225	-0.50169	-0.41654	39
CASP8AP2	-0.697468	-0.596742	-0.358797	-0.233461	0.912926	0.891027	0.0219751	-0.125534	0.266056	0.0866324	23
CASP9	1.24534	1.00868	0.689579	0.324019	-0.28029	-0.382204	-0.0340946	-0.0859793	-0.514197	-0.621357	12
CAST	2.69119	2.65513	1.66587	1.71372	-0.0385159	-0.0182999	-0.321977	-0.327463	-0.625434	-0.485618	414
CASTOR2	1.92858	1.72401	0.732946	0.53174	-0.110197	-0.422266	-0.0397842	-0.168655	-0.154212	0.0474683	5
CASZ1	-0.470435	-0.407166	-0.111154	-0.253099	0.930985	1.0947	0.422265	0.361552	-0.221995	-0.252015	3
CAT	-0.0193476	-0.4027	0.184125	-0.00592725	0.0840416	-0.0224537	-0.00873228	0.373246	-0.0738925	-0.00103858	171
CATSPERG	-0.141246	-0.00833531	-0.352584	-0.574674	0.181156	-0.0345712	0.43255	0.353828	0.921883	0.77982	1
CAV1	-1.12609	-0.893289	-1.54071	-1.39055	0.135634	0.0968355	0.488115	0.655128	0.0701819	0.267565	33
CAV2	-0.226738	-0.290164	-0.852368	-0.485976	0.100144	-0.068562	0.528549	0.57968	0.44429	0.36633	8
CAVIN1	-0.631813	-0.55531	-0.706048	-0.636416	0.0674635	0.0333966	0.365652	0.48753	0.334577	0.484632	152
CAVIN2	-0.594734	-0.643688	-0.538869	-0.343604	0.134395	0.00754804	0.303823	0.381999	0.481908	0.503878	17
CAVIN3	-1.8552	-1.92953	-1.33621	-1.27548	0.166873	0.0147862	0.416649	0.50586	0.532781	0.432882	11
CBARP	-0.753892	-0.599932	-1.35236	-1.03649	-0.0181661	0.0737663	0.911614	0.893902	0.699418	0.802377	8
CBFA2T2	-0.33108	-0.503924	1.56159	1.6438	0.283184	0.396682	0.114337	-0.0484212	-0.394233	-0.0932806	9
CBFB	2.39666	2.39591	0.975796	1.0007	-0.0198041	0.0558173	-0.20684	-0.0668576	-0.534216	-0.371381	29
CBL	1.89439	2.01494	0.369011	0.415017	-0.384034	-0.348529	-0.132825	-0.141907	-0.4831	-0.0714198	8
CBLB	2.13246	1.90872	0.597278	0.523881	-0.338813	-0.246997	-0.111246	-0.0158767	-0.183909	-0.382559	14
CBLL1	-0.487973	-0.518058	0.142932	0.198334	1.21058	1.11393	0.047855	-0.175481	-0.425448	-0.533348	11
CBR1	2.29356	2.15024	1.29673	1.1872	-0.138863	-0.0765118	-0.193665	-0.144972	-0.483633	-0.404343	82
CBR3	2.25319	2.23536	1.30746	1.08796	-0.118322	-0.219355	-0.0616047	-0.0883191	-0.696371	-0.442414	15
CBR4	-0.595216	-0.732338	-0.22967	0.0957391	0.377738	0.144428	0.270754	0.249011	-0.690064	-0.649408	9
CBWD2	1.74486	1.61026	-0.0270995	0.0148016	-0.325983	-0.591127	-0.606093	-0.303992	0.162095	-0.0635644	1
CBX1	-0.181506	-0.239246	0.652875	0.960852	1.18356	1.14511	0.00283585	-0.16041	-0.925408	-0.899641	42
CBX2	-1.89301	-1.09991	-0.290898	-0.485404	0.173913	0.418751	0.148311	-0.247144	0.152437	0.140297	1
CBX3	-0.505877	-0.353098	1.26337	1.43983	1.00177	0.927569	-0.0658749	-0.0722146	-0.633069	-0.748164	90
CBX4	-0.828567	-1.09908	-0.234151	-0.297005	0.273863	0.365026	-0.129719	-0.217745	1.22563	0.967206	15
CBX5	-0.640144	-0.591143	0.27981	0.387754	1.21478	1.19206	0.0522691	-0.149296	-1.1449	-1.10192	95
CBX6	-0.318506	-0.444469	-0.438211	-0.516192	0.278395	0.216664	-0.105768	-0.02228	1.19176	1.07504	5
CBX8	-1.22598	-1.27783	-0.853567	-0.754315	0.935818	1.0197	0.0103082	-0.12108	0.67482	0.43156	29
CBY1	0.00783265	0.163227	-0.974753	-0.731805	0.0782716	0.068313	0.676894	0.841271	-0.145916	0.298522	3
CC2D1A	1.73338	1.65347	0.610044	0.453969	-0.291087	-0.367726	0.0334952	-0.125827	-0.377101	-0.522745	48
CC2D1B	1.82345	1.74725	1.12231	1.12755	-0.185791	-0.28802	-0.101121	-0.104014	-0.24397	-0.144777	42
CC2D2A	0.378254	0.178599	-0.639434	-0.44496	-0.24198	-0.350494	0.294342	0.268568	0.372915	0.273594	22
CCAR1	-0.18356	-0.246841	1.0261	1.13392	0.815148	0.945025	-0.123553	-0.199243	-0.270244	-0.212389	109
CCAR2	-0.736947	-0.658307	0.392628	0.452319	0.0102195	0.0826683	-0.34109	-0.310178	0.319155	0.367829	173
CCDC102A	0.918551	0.638461	0.915519	1.06607	-0.273894	-0.177843	-0.054583	-0.0542444	-0.257718	-0.0141914	17
CCDC106	-0.755331	-0.689335	-0.345025	-0.334822	-0.0312359	0.174215	-0.110381	0.0054664	1.10117	1.04202	8
CCDC107	-0.154995	0.00970194	-0.408597	-0.138498	0.194113	0.139633	0.342954	0.165737	-0.0183074	-0.00339826	3
CCDC112	0.129625	-0.106612	-0.292953	-0.517965	0.123478	-0.112856	0.202489	0.413012	0.327565	0.267631	1
CCDC115	-0.265854	-0.150935	-0.668495	-0.489546	0.000685654	0.00549455	0.264256	0.314939	0.0924968	0.141264	10
CCDC117	0.702234	0.431576	1.54202	1.72135	0.0468648	0.0738017	-0.365239	-0.229994	-0.294079	-0.278445	15
CCDC12	-0.0653469	0.151747	1.31143	1.22273	0.794939	0.851003	-0.187989	-0.140799	-0.238748	-0.209568	35
CCDC120	0.0925375	-0.0764023	0.213245	-0.0609368	-0.389419	-0.477113	-0.0193006	0.000805268	0.102267	0.0370844	1
CCDC124	1.43853	1.40789	1.30316	1.33729	-0.416762	-0.338648	-0.598861	-0.572791	0.0447909	-0.0124148	54
CCDC126	-2.36632	-2.6171	-2.51415	-1.78521	0.0371172	0.109467	0.879044	1.13064	0.786427	0.746507	3
CCDC127	-0.882296	-0.817921	-1.18362	-0.944941	0.567534	0.683509	1.12879	1.16096	-0.0480418	0.0918415	29
CCDC130	-0.76461	-0.881041	-0.00655986	-0.294123	0.386293	0.605537	0.0306514	-0.0575248	-0.0619659	-0.0270289	8
CCDC134	-0.578782	-0.583464	-0.235704	-0.055457	0.120431	0.0385481	0.462139	0.521194	-0.0122062	-0.0332412	19
CCDC137	-1.27602	-1.36346	-0.972724	-1.11805	0.900569	0.980778	0.026504	-0.161957	0.802297	0.446526	19
CCDC138	-0.534939	-0.717255	-0.650545	-0.688692	-0.00150878	0.114126	0.461574	0.553856	0.965128	0.725249	10
CCDC14	-0.577388	-0.670208	-0.33609	-0.269763	0.0337143	0.00831116	0.302189	0.362352	0.841686	0.74456	22
CCDC15	0.444005	-0.0947537	-0.339227	-0.225681	0.37226	0.392134	0.424679	0.481003	-0.652692	-0.446607	1
CCDC152	-0.207357	-0.555347	1.27688	1.29079	0.0363638	0.00181426	-0.0837011	-0.0338752	-0.00401198	0.145867	5
CCDC167	-0.922391	-0.978567	-0.730469	-0.74015	0.0747083	0.00426658	0.627678	0.741823	0.228465	0.287456	6
CCDC174	0.0117872	0.112734	1.53084	1.76508	0.180345	0.320159	-0.0761688	-0.0667429	-0.401338	-0.394688	22
CCDC175	-0.549464	-0.299119	-0.958037	-0.711802	0.658035	0.544114	0.966762	1.00929	-0.125571	0.0132267	4
CCDC18	1.24234	0.991868	0.823226	0.803047	-0.153271	-0.154518	-0.173585	-0.128749	-0.172025	-0.207894	29
CCDC182	-1.00282	-1.05054	0.33549	0.0894063	-0.16327	-0.0758037	-0.354154	0.131147	0.502693	1.55613	3
CCDC186	1.33135	1.27518	1.27876	1.19135	-0.162942	-0.203833	-0.0574194	-0.0613351	-0.426334	-0.478405	34
CCDC22	1.14734	1.02291	0.425837	0.332506	-0.615799	-0.618049	-0.0911039	-0.0616904	-0.0592416	-0.0592908	45
CCDC25	2.18	1.98135	1.35152	1.2991	0.0114022	-0.179413	-0.12062	-0.153731	-0.514793	-0.508845	26
CCDC28A	0.656268	0.681421	-0.218751	-0.219733	-0.0683174	-0.0779084	0.244608	0.296659	-0.242413	-0.175177	5
CCDC28B	0.804037	0.900854	-0.33094	-0.354688	-0.352885	-0.118392	0.0327967	0.279136	-0.187815	0.00405798	6
CCDC32	2.36865	2.45607	0.756554	0.601616	-0.474434	-0.248213	-0.0969603	0.00462872	-0.326878	-0.269482	3
CCDC34	-1.04459	-0.824612	0.154213	0.309936	0.184632	-0.165271	0.328206	0.363852	-0.342877	-0.286472	2
CCDC43	3.05332	2.93223	1.09219	0.992516	-0.0443255	-0.0452433	-0.192732	-0.207582	-0.406665	-0.351233	35
CCDC47	-1.00753	-1.20875	-1.74268	-1.68041	0.0990566	0.0821987	0.558671	0.697782	0.146662	0.159634	87
CCDC50	2.49206	2.40908	0.806815	1.03505	-0.512083	-0.250624	-0.422455	-0.0666803	-0.465175	-0.116604	39
CCDC51	-0.288763	-0.396487	-0.799501	-0.635837	0.358104	0.253817	0.828575	0.84492	-0.191235	0.0562341	51
CCDC58	-0.527045	-0.359659	0.634658	0.567342	0.154242	0.285391	-0.100355	0.0510494	-1.01608	-0.764878	25
CCDC59	-1.11917	-1.13994	-1.33117	-1.1386	0.917247	0.961497	0.0244103	-0.153411	0.745886	0.548616	11
CCDC6	2.14033	1.96664	1.17202	1.25369	-0.0266591	0.000299882	-0.167148	-0.190334	-0.656157	-0.399301	64
CCDC61	-0.232084	-0.252648	-0.886372	-0.681993	-0.0449137	-0.0324558	0.488785	0.611456	1.03331	0.931008	7
CCDC66	0.966811	0.803428	0.604596	0.523226	-0.428047	-0.263906	-0.0817441	-0.0105876	-0.151314	-0.286554	3
CCDC71	0.202502	0.155568	-0.0877398	-0.197489	1.31622	1.19348	0.461528	0.152649	-0.153578	-0.228544	2
CCDC71L	-0.107487	0.171381	-0.27964	-0.106663	1.03309	1.14024	-0.00170901	0.0663782	-0.140559	0.151894	2
CCDC77	-0.754785	-0.643217	-0.779087	-0.719715	0.01108	0.0851723	0.190966	0.284677	1.00155	0.940164	24
CCDC80	-0.62713	-0.504599	-0.781613	-0.778966	0.233166	-0.163299	0.930675	0.52382	0.583546	0.351671	24
CCDC82	-0.368541	-0.515437	1.71383	1.82887	0.129759	0.0993549	-0.0717088	0.101651	-0.431871	-0.199117	15
CCDC84	-0.507311	-0.999755	-0.256017	-0.201292	-0.0514817	0.166157	-0.00500867	0.0441254	1.2192	1.42135	5
CCDC85B	0.0727341	-0.0114531	-0.202364	-0.128478	-0.000516063	0.247148	0.260132	0.193699	-0.285948	-0.128923	3
CCDC85C	1.93715	2.15888	0.581039	0.64503	-0.58392	-0.319681	-0.0934584	-0.11126	-0.496031	-0.423171	9
CCDC86	-0.955988	-0.953721	-0.591522	-0.528534	1.17556	1.13017	0.0115828	-0.203878	0.618485	0.310689	30
CCDC88A	1.58795	1.48576	0.0963837	0.0598479	-0.404048	-0.470599	0.0168394	-0.0199206	-0.183992	-0.248357	79
CCDC88C	0.742196	0.741349	-0.122334	-0.0965246	-0.320783	-0.277749	0.0547259	0.11271	-0.304821	-0.367358	51
CCDC9	1.1337	0.93183	-0.332009	-0.177112	-0.121461	-0.129466	-0.11529	-0.12348	0.720194	0.756202	25
CCDC90B	-1.04949	-1.23334	-0.996079	-1.22991	0.586816	0.582068	0.974774	1.0924	0.0207324	0.0512166	25
CCDC91	2.55107	2.54889	1.3423	1.24964	-0.0106417	0.0133336	-0.147464	-0.19803	-0.549278	-0.561098	23
CCDC92	0.567124	0.34441	0.548911	0.629756	-0.0345907	-0.10232	-0.18195	-0.102087	0.0582149	0.0291302	3
CCDC93	0.913878	0.890105	0.4056	0.303342	-0.549156	-0.54232	-0.112478	-0.0844847	-0.0784154	-0.102221	75
CCDC94	-0.216352	-0.202485	1.32367	1.45445	0.14158	0.225748	-0.040496	-0.0213043	-0.370276	-0.397086	33
CCDC97	-0.208552	0.0736059	0.626584	0.840877	-0.0297786	-0.112907	-0.620825	-0.40648	0.66164	0.740335	23
CCDC9B	0.133916	0.127824	-0.433352	-0.331432	0.217941	0.122187	-0.11321	-0.0570841	0.711072	0.663677	20
CCHCR1	0.381304	0.161297	-0.0937134	0.0465788	-0.0929707	-0.0370016	0.0751852	0.184361	-0.105054	-0.100949	7
CCL2	0.573184	0.556733	0.334248	0.555801	-0.60469	-0.574225	-0.125361	0.0330297	-0.153631	-0.157733	1
CCM2	0.273031	0.0691895	-0.228904	-0.269678	-0.278604	-0.391942	0.140954	0.29062	0.742555	0.749855	18
CCNA2	0.511364	0.473337	1.27615	1.47953	0.0540463	0.110219	-0.168043	-0.159869	-0.350363	-0.340674	18
CCNB1	1.32813	1.11302	0.428634	0.493347	-0.460515	-0.410751	-0.0470192	-0.0453124	-0.381302	-0.423212	11
CCNB2	0.847	0.664068	0.369221	0.457076	-0.397457	-0.334314	-0.0366672	-0.0233957	-0.307974	-0.235097	14
CCNC	-0.484445	-0.743503	-0.146644	0.0657572	0.0925628	-0.0535125	-0.0217915	-0.138769	0.696222	0.638656	7
CCND1	1.30591	1.20873	0.835985	0.904635	-0.169786	-0.240352	-0.055431	-0.0317433	-0.0857459	-0.132718	4
CCND3	0.883471	0.30479	0.411038	0.547459	-1.15515	-1.10179	0.236825	-0.430895	-0.207165	-0.591713	2
CCNDBP1	1.92956	1.7509	0.277011	-0.0617992	-0.579395	-0.458079	-0.123427	-0.0825089	-0.00358893	-0.0235539	6
CCNE1	-0.0784763	-0.158438	1.79253	1.82255	-0.0498384	0.126461	-0.0404095	0.0944744	-0.140941	0.0178554	9
CCNE2	-0.333785	-0.355041	1.0505	1.02612	0.080806	0.190855	-0.0201989	0.00588794	-0.263163	-0.103602	9
CCNF	-0.0295613	-0.476814	0.394449	0.547819	-0.24438	-0.241926	0.0303829	-0.00783831	0.0230135	0.0620215	5
CCNH	-0.362686	-0.287473	1.43681	1.41243	0.0469907	0.00684494	0.0317714	0.00535904	-0.0159088	0.0118851	29
CCNI	0.0771824	0.114811	0.569888	0.321944	-0.19574	-0.305912	0.403866	0.430167	-0.0114872	0.0988322	1
CCNK	-0.544926	-0.477468	0.747596	0.762506	0.241015	0.282595	-0.425401	-0.398911	0.0992095	-0.0387081	26
CCNL1	-0.499014	0.214777	1.0036	1.50078	1.13325	1.13168	-0.135062	-0.124282	-0.354963	-0.307697	7
CCNL2	-1.11982	-0.782056	1.28217	1.35282	0.769245	0.565779	-0.0393572	-0.0707703	-0.492815	-0.440364	7
CCNQ	0.163323	0.249871	0.438379	0.655532	1.17815	1.14933	-0.255945	-0.00754778	-0.645626	-0.498967	1
CCNT1	-0.922352	-0.936276	0.986389	1.02229	-0.00761673	0.0855149	-0.170062	-0.193513	0.216308	0.256875	25
CCNT2	-0.468154	-0.338604	0.982037	1.09429	0.0746621	0.0929817	-0.329931	-0.350508	0.0907346	0.0581739	10
CCNY	-0.609704	-0.33746	-0.738378	-0.649181	0.00379897	-0.000853733	0.71797	0.799106	0.750885	0.789345	16
CCNYL1	-0.933219	-0.404088	-0.774754	-0.919516	0.0730004	0.0418883	0.809838	0.884961	0.938137	0.958832	20
CCP110	0.354258	0.264931	-0.251129	-0.11238	-0.173634	-0.202628	-0.00897259	0.123062	0.117692	0.0449908	31
CCPG1	-1.04013	-0.937114	-1.70892	-1.58858	0.0759705	0.0706141	0.687457	0.765529	0.235692	0.273468	52
CCS	2.2481	2.15569	1.21585	1.18359	-0.0133123	-0.0122094	-0.168542	-0.0769517	-0.433504	-0.50319	17
CCSAP	-1.24485	-0.982736	-0.416511	-0.3122	1.75513	1.70492	2.09158	2.20601	-0.0985975	0.153811	2
CCSER1	-0.308954	-0.127072	-0.476753	-0.432695	0.0147736	-0.599571	0.562902	0.746127	0.412774	0.366738	2
CCSER2	0.31456	0.48478	0.547259	0.414532	-0.244882	-0.395046	-0.0186178	0.037058	-0.208899	-0.0664474	2
CCT2	0.542372	0.399448	0.0161334	-0.0648717	-0.999623	-0.984975	-0.775294	-0.662821	0.307789	0.252283	396
CCT3	0.534912	0.400696	0.0357029	-0.0278347	-0.892069	-0.896029	-0.597028	-0.561215	0.339419	0.276359	284
CCT4	0.564877	0.440177	0.0630234	-0.0177523	-0.814084	-0.859562	-0.600064	-0.534834	0.291264	0.200745	345
CCT5	0.635725	0.546739	0.0419296	-0.0292681	-0.965358	-0.984627	-0.840967	-0.770469	0.21392	0.127335	415
CCT6A	0.560054	0.412735	0.0109706	-0.0511359	-1.05374	-1.12806	-0.889773	-0.802043	0.271472	0.200534	272
CCT6B	0.665598	0.3875	-0.235164	-0.0956788	-1.24269	-1.45043	-1.25438	-1.32665	0.121123	0.192684	1
CCT7	0.507695	0.352092	0.0512999	-0.0775885	-0.867862	-0.898361	-0.699711	-0.582995	0.369561	0.301859	306
CCT8	0.571478	0.469203	0.0495342	-0.0342281	-1.01918	-1.06458	-0.843514	-0.788602	0.232593	0.167683	443
CD101	0.12798	-0.0252786	-0.921332	-0.601237	0.221196	-0.0746113	0.217218	0.347508	0.284174	0.525429	1
CD109	-0.514145	-0.404029	-0.595554	-0.525777	0.0439144	0.00490152	0.686016	0.817136	0.763823	0.83319	147
CD14	0.0708307	0.442288	-0.227871	-0.110235	-0.423143	0.567995	-0.00783513	-0.0486432	2.4166	-0.0488567	3
CD151	-0.849384	-0.438021	-1.06432	-1.33618	0.16315	-0.0165653	0.916786	0.959479	1.26177	1.13761	9
CD276	0.00629142	0.108413	-0.77033	-0.557458	0.00608922	0.0288103	0.806531	0.946055	0.640308	0.816689	24
CD2AP	2.00851	1.85908	1.18762	1.20361	-0.261261	-0.319913	-0.096384	-0.0417425	-0.396416	-0.423933	71
CD2BP2	-0.384036	-0.299816	0.190823	0.199715	-0.00330324	0.096153	-0.566967	-0.567113	0.656252	0.623831	52
CD320	-1.1617	-1.28712	-1.20741	-1.1833	-0.0032707	0.00168009	0.54613	0.444643	0.732919	0.612749	10
CD33	-0.565494	-0.699344	-1.03768	-1.25813	-0.0435325	0.190117	0.417304	0.792446	0.456396	0.543653	2
CD3EAP	-0.160316	-0.240651	-0.468829	-0.425198	0.639174	0.591831	-0.147557	-0.111037	0.511289	0.382093	31
CD40LG	0.703059	0.886159	-0.365943	-0.519031	0.341691	-0.152521	0.311268	0.083911	-0.106681	-0.0692151	1
CD44	-0.764089	-0.767186	-1.09742	-0.977256	0.0654121	0.0482038	0.768317	0.899005	0.616893	0.703636	128
CD46	-1.38928	-1.74165	-1.81671	-1.63626	0.0675035	0.0270768	1.04177	1.23525	1.09864	1.08641	29
CD47	-1.09286	-1.21383	-1.29283	-1.38938	0.0766332	0.0699514	0.922887	0.944385	0.797308	0.799159	16
CD55	-0.313173	-0.373581	-0.740337	-0.724003	0.0400142	0.00602976	0.682962	0.873462	0.933718	0.878614	99
CD58	-0.806741	-0.6938	-1.31435	-1.40203	0.0481357	0.0984489	1.02133	0.99431	0.859669	0.80142	17
CD63	-1.6162	-1.54243	-1.52685	-1.85709	0.083794	0.0463754	1.06686	1.26615	1.75338	1.69951	21
CD70	-0.679022	-0.445541	-0.943899	-0.951632	0.049155	0.0734677	0.733848	0.772553	0.274642	0.439675	3
CD74	-0.312255	-0.390825	-0.750219	-0.562374	0.0340203	0.13725	0.477009	0.502467	-0.00201483	0.199825	15
CD81	-0.924721	-0.957931	-1.79179	-1.57832	0.0118156	0.0621899	0.568951	0.720336	1.12005	1.03806	36
CD82	-0.265987	-0.325612	-1.18249	-1.13081	0.00169588	-0.0232426	0.756597	0.803397	1.18458	1.1843	12
CD83	-1.13157	-0.749574	-0.951513	-1.01845	-0.0151354	-0.0117892	0.835671	0.627734	0.607445	0.43531	13
CD9	-0.584338	-0.554805	-1.37995	-1.28732	0.0848607	0.0127312	0.797749	0.955045	1.24305	1.163	58
CD99	-0.792786	-0.587008	-1.09749	-1.07001	0.0460515	0.0432346	0.795162	0.897471	0.786803	0.751598	59
CD99L2	-1.10532	-1.17021	-1.20726	-1.29235	0.0941205	0.0389748	1.01747	1.09731	1.14723	1.14351	14
CDA	1.57812	1.68232	1.63956	1.53287	0.0354643	0.0640168	-0.176395	-0.258405	-0.399758	-0.380418	12
CDAN1	1.86524	1.85755	0.193563	0.14286	-0.226018	-0.079229	-0.0578577	-0.0591332	-0.249368	-0.342595	12
CDC123	2.30587	2.12223	0.824213	0.741605	-0.175138	-0.208478	-0.155125	-0.00108499	-0.24486	-0.288572	21
CDC14B	3.26428	3.08363	1.69643	1.86603	-0.076859	0.0724237	-0.0499689	-0.0423627	-0.123104	-0.324729	1
CDC16	0.275406	0.216787	-0.00586056	-0.118109	-0.0801665	-0.00668598	-0.230344	-0.283691	0.603842	0.517744	45
CDC20	0.316792	0.302733	0.659627	0.60341	-0.209735	-0.119867	-0.0013165	0.0140743	-0.195918	-0.219581	7
CDC23	0.134862	0.138635	0.0847961	-0.0606121	0.0332163	0.0737328	-0.255068	-0.296268	0.680105	0.48138	55
CDC25A	-0.151315	0.422298	1.22502	1.44343	0.0916935	0.190064	-0.10924	-0.0820863	-0.428907	-0.284242	2
CDC25B	0.776988	0.872197	0.637984	0.703724	-0.354038	-0.31282	-0.0416144	0.00622684	-0.422138	-0.457656	6
CDC25C	2.61992	2.35835	0.521391	0.375521	-0.20197	-0.261932	-0.303025	-0.0707252	-0.218417	-0.205431	12
CDC26	0.393868	0.384498	-0.131556	-0.105251	-0.108319	0.0755063	-0.391109	-0.710079	0.635572	0.649606	13
CDC27	-0.00850516	-0.0887215	-0.0958497	-0.166446	0.0726269	0.129957	-0.0858162	-0.183458	0.789945	0.546821	62
CDC34	1.22565	1.10309	0.699122	0.378079	-0.373618	-0.434226	0.0267703	-0.0755474	-0.0943215	-0.232139	8
CDC37	2.05321	1.95317	1.36566	1.44483	-0.118717	-0.070816	-0.183499	-0.0306263	-0.361783	-0.218204	125
CDC37L1	2.56925	2.26636	0.760243	0.652765	-0.24362	-0.309252	-0.0416248	-0.211893	-0.406228	-0.502789	13
CDC40	-0.634166	-0.688073	-0.62933	-0.637981	0.808277	0.794654	-0.0208534	-0.114716	0.555289	0.36539	68
CDC42	0.872941	0.909571	-0.301057	-0.323675	-0.465305	-0.511925	0.0114333	0.106144	0.118797	0.127196	117
CDC42BPA	-0.332725	-0.300263	-0.178105	-0.193341	-0.180194	-0.168781	0.2808	0.388562	0.344036	0.293536	113
CDC42BPB	0.370957	0.319691	0.0842456	-0.0334417	-0.47289	-0.490752	-0.00465417	0.0783824	0.00635491	0.00831431	134
CDC42BPG	0.960868	0.940442	0.128365	-0.0250362	-0.205325	-0.457281	-0.0428406	-0.0258351	-0.0386808	-0.12357	8
CDC42EP1	-0.189737	-0.212959	-0.197001	-0.181582	-0.126281	-0.0361074	0.274256	0.33701	0.477998	0.436452	21
CDC42EP2	1.08782	0.685557	-0.0756237	0.298082	-0.233415	-0.0118536	-0.0983451	0.0671972	-0.129526	0.0439692	5
CDC42EP3	0.761859	0.333476	0.0923814	0.354643	-0.432769	-0.533117	0.0247173	0.0552572	-0.140636	-0.264465	7
CDC42EP4	2.24934	2.0679	0.891528	0.912941	-0.31727	-0.334397	-0.0699625	-0.0439514	-0.513817	-0.474264	23
CDC42SE1	-1.08097	-0.976997	-1.32782	-1.21772	-0.0214552	0.16804	1.23967	1.28816	1.54512	1.59843	1
CDC42SE2	-3.91577	-4.06401	-4.61279	-3.86682	0.0492938	0.0972908	1.04588	1.06789	1.21765	1.19838	3
CDC45	0.218844	0.273271	1.00129	0.917767	-0.128244	-0.130518	0.105147	0.0281262	-0.068417	-0.0905324	44
CDC5L	-0.730827	-0.707759	-0.612678	-0.702694	0.85441	0.873331	-0.0271508	-0.161014	0.827277	0.601264	164
CDC6	-0.301834	-0.315167	-0.818455	-0.638913	0.0266231	0.0772053	0.40162	0.29195	0.689485	0.429593	6
CDC7	-0.685631	-0.56304	0.212756	0.208499	-0.383005	-0.418771	0.0285099	0.0636184	0.0750519	0.118117	13
CDC73	-0.467058	-0.461565	1.5212	1.60881	0.745356	0.833522	-0.156383	-0.139354	-0.11777	-0.0453479	88
CDCA2	-0.653248	-0.682297	-0.683467	-0.687213	0.962555	1.04059	0.104502	0.0481414	0.0180779	0.0526219	51
CDCA3	-0.695213	-0.630506	-0.240812	-0.284906	0.110941	0.0354338	0.557328	0.567081	0.490771	0.654917	9
CDCA4	0.898069	0.81129	1.49967	1.69238	-0.241727	-0.204251	-0.183883	0.0915513	-0.32031	-0.104778	1
CDCA5	0.497661	0.236079	-0.191883	-0.13896	0.920795	1.23919	-0.0695835	-0.12367	-0.801935	-0.76759	7
CDCA7	0.0964093	0.201461	-0.494366	-0.307012	1.49322	1.39219	0.198361	0.0614707	-0.48479	-0.317002	4
CDCA7L	-0.0453097	0.0474144	-0.372681	-0.497512	1.74274	1.66425	0.847476	0.544699	-0.14543	-0.10142	19
CDCA8	-0.958793	-0.961627	-0.997017	-0.882143	0.669876	0.683811	0.201241	0.13518	-0.0200876	0.0575209	27
CDCP1	-0.315615	-0.447468	-1.17521	-1.29038	0.0631261	-0.057846	0.870493	1.00469	1.08997	1.11172	42
CDH11	-0.373003	-0.0894897	-1.19505	-0.856227	0.0146729	0.0689073	0.839671	0.865104	0.568696	0.651729	10
CDH12	-0.411426	-0.459628	-1.30558	-1.23546	0.105402	0.00490057	0.958258	1.05402	0.694162	0.770993	5
CDH13	-0.514332	-0.629305	-0.731888	-0.69062	0.0489656	-0.00981692	0.721859	0.907639	0.784991	0.783191	67
CDH2	-0.555561	-0.726676	-1.05453	-1.03534	0.0669575	0.0235025	0.639548	0.757625	0.335239	0.350749	116
CDH6	-0.879292	-0.870989	-1.52156	-1.23604	0.0743157	0.0181062	0.641	0.876925	0.338147	0.403681	8
CDIPT	-1.12604	-1.14687	-1.32286	-1.3755	0.106318	0.183924	0.450021	0.499374	0.0873084	0.14225	14
CDK1	1.76748	1.55105	0.919223	0.78332	-0.302105	-0.316797	-0.0952495	-0.0636288	-0.379298	-0.451163	70
CDK10	-0.161165	-0.279892	0.205369	0.228435	0.965919	0.89196	-0.0460538	-0.0994924	-0.534367	-0.393826	4
CDK11A	-0.740333	-0.6233	0.76264	0.643992	0.0233846	0.0828206	0.0319552	-0.00762256	0.109586	-0.0259867	4
CDK11B	-1.43934	-1.15519	0.899081	1.09211	0.557594	0.421025	-0.263374	-0.00249027	-0.119704	-0.24352	5
CDK12	-0.605679	-0.738779	1.16158	1.25719	0.670818	0.762835	-0.201757	-0.144982	0.0499185	-0.110252	54
CDK13	-0.691372	-0.751577	0.531234	0.696588	0.0111325	0.0900504	-0.525242	-0.548668	0.611931	0.343001	57
CDK14	2.16512	2.00288	0.0216055	0.0239004	-0.374866	-0.342023	0.0673204	0.0799619	-0.429918	-0.236888	4
CDK16	1.52619	1.18308	0.361852	0.328882	-0.451265	-0.376028	-0.0846461	-0.00952482	-0.147593	-0.095455	15
CDK17	0.671768	0.563603	-0.290225	-0.445996	-0.515038	-0.473129	0.117231	0.321956	0.0101504	0.262172	8
CDK18	1.38064	1.09699	-0.422623	-0.82429	0.015663	0.130922	0.375128	0.421601	-0.293826	-0.18105	1
CDK19	-0.368937	-0.589188	0.400716	0.342327	0.0343539	-0.0248095	-0.084416	-0.137075	0.796833	0.563196	6
CDK2	1.38089	1.214	0.773806	0.808583	-0.289671	-0.363013	-0.024891	-0.0653207	-0.234328	-0.305726	49
CDK2AP1	-0.0980013	-0.203701	-0.269131	-0.0357199	0.96326	0.831838	-0.173846	-0.323484	0.322988	0.477451	3
CDK4	1.65882	1.57888	0.571254	0.450509	-0.285883	-0.462806	-0.0307276	-0.132134	-0.203235	-0.374706	29
CDK5	1.14649	1.22829	0.689326	0.568513	-0.388074	-0.341922	-0.098667	0.00859205	-0.487952	-0.315762	28
CDK5RAP1	-0.961842	-1.04833	-0.187308	-0.010431	0.173287	0.231886	0.341155	0.342107	-0.651487	-0.585248	30
CDK5RAP2	0.127412	0.112451	-0.158197	-0.24228	-0.241002	-0.23672	0.105886	0.195727	0.377258	0.300357	138
CDK5RAP3	-0.955729	-0.89202	-0.864722	-0.776357	0.0753729	0.101278	0.529046	0.630984	0.10443	0.156532	53
CDK6	1.53274	1.28062	0.698658	0.825336	-0.311552	-0.302034	-0.0856277	-0.0689894	-0.305256	-0.25282	29
CDK7	-0.334159	-0.38368	1.69006	1.73972	0.0120026	0.105396	-0.0776937	0.00807115	-0.080744	-0.0236481	18
CDK8	-0.732337	-0.805594	0.0846436	0.160242	-0.0301613	0.121681	-0.433009	-0.220713	0.436673	0.334219	8
CDK9	-0.763735	-0.780688	0.932917	0.902109	0.0442508	0.0937022	-0.287676	-0.211898	0.10289	0.217018	24
CDKAL1	-0.879852	-0.821887	-1.00892	-0.988018	0.11262	0.104355	0.538059	0.663146	0.139214	0.207259	36
CDKL5	-0.307011	-0.0873327	-0.387541	-0.406153	-0.0452434	0.0476491	0.214812	0.181552	0.579825	0.304781	20
CDKN1A	-0.0301741	-0.175413	1.52525	1.46639	0.207593	0.110014	-0.0388749	-0.0224946	-0.274416	-0.251797	6
CDKN1B	0.0830887	0.0483349	2.02722	1.95563	0.011907	0.0721617	-0.0445776	-0.0580042	-0.473151	-0.174995	10
CDKN1C	0.16948	0.026266	1.38403	1.61595	0.186126	0.111729	-0.132643	-5.68174e-05	-0.200259	-0.520045	5
CDKN2A	2.74969	2.44987	0.616985	0.640024	-0.0188528	-0.350469	-0.301882	-0.0598387	-0.204564	-0.490667	7
CDKN2AIP	-1.4936	-1.52009	0.915182	0.87331	0.0276093	0.144547	-0.0923835	-0.0513493	0.0584798	0.0389309	50
CDKN2AIPNL	0.28677	0.339802	0.780761	0.906904	0.153653	0.0942724	-0.444129	-0.703504	-0.0113792	0.0384653	9
CDKN2B	2.51241	2.23046	0.713614	0.401668	-0.0446051	-0.076583	-0.202243	-0.301175	-0.598002	-0.693494	2
CDKN2C	2.58486	2.41742	0.840663	0.712051	-0.0684541	-0.0815491	-0.114777	-0.270397	-0.380336	-0.321033	15
CDKN2D	1.8377	1.62371	0.617923	0.281507	0.119431	-0.602857	-0.151446	-0.273466	-0.0509608	-0.404581	1
CDNF	-0.614656	-0.666131	0.960025	1.17557	0.0868003	0.0597843	0.407087	0.224686	-0.515764	-0.486099	1
CDO1	0.92629	0.939487	0.157934	0.0838218	-1.26523	-1.00297	-1.05284	-1.04095	0.0937813	0.0942848	3
CDON	-0.226706	-0.40526	-0.464379	-0.371458	0.0470638	0.0544768	0.67877	0.712136	0.819319	0.791529	5
CDPF1	-0.255697	-0.136515	1.46818	1.50054	0.0451227	0.156836	-0.146516	-0.195287	0.0739816	-0.0249805	5
CDR2	1.38503	1.24177	0.493685	0.547359	-0.216393	-0.227283	-0.000921324	-0.0974236	-0.464575	-0.337456	9
CDR2L	2.26619	2.12526	0.748567	0.862786	-0.318343	-0.183588	-0.08278	-0.152157	-0.529778	-0.52455	20
CDS1	-0.551843	-0.303832	-0.944999	-0.931985	-0.011169	0.0501934	0.378942	0.545946	0.0756197	0.204401	4
CDS2	0.284712	0.345595	-0.54566	-0.627734	-0.0697013	0.0903441	0.375245	0.401897	-0.0540233	0.0862794	10
CDT1	0.0902953	0.0379871	0.889378	0.893379	-0.0781139	0.155756	-0.0647266	0.0598415	-0.331134	-0.0979924	12
CDV3	3.09126	3.06292	1.66824	1.70073	-0.00236994	-0.0850053	-0.287758	-0.402668	-0.46925	-0.540972	38
CDX2	-0.212149	-0.123371	-0.641196	-0.734565	0.0198141	0.128759	0.0633568	-0.0173255	0.671785	0.61039	1
CDYL	-1.26349	-1.43745	0.295626	0.363615	0.602021	0.706217	-0.135558	-0.29275	0.0873523	-0.0214096	28
CDYL2	-0.317947	-0.306739	-0.254434	-0.519052	1.4299	1.46475	0.0557325	-0.0775144	0.0528709	-0.207855	7
CEBPB	-0.618572	-0.637634	-0.272533	-0.242948	1.64664	1.61809	0.50513	0.214328	-0.0874771	-0.161246	18
CEBPD	-1.01796	-1.09653	-0.170249	-0.160594	1.90787	1.76515	0.576763	0.406061	-0.640419	-0.616435	1
CEBPG	-0.605388	-0.0956047	-0.0917028	-0.0204509	0.782228	0.616306	0.147175	0.0193651	-0.366507	-0.222605	5
CEBPZ	-0.581107	-0.505034	-0.866811	-0.850679	1.88804	1.864	0.632721	0.386415	0.0385616	-0.0373047	109
CEBPZOS	-1.54712	-1.75473	-0.840522	-0.665638	0.392605	0.522739	0.658167	0.612623	0.0883598	-0.00101471	3
CELF1	-0.894469	-0.876276	-0.282525	-0.343898	0.669368	0.746879	-0.0233933	-0.0854407	0.224863	0.069098	56
CELF2	-0.359804	-0.520524	-0.224639	-0.28139	0.610547	0.718918	0.0214527	-0.0188943	0.00387879	0.0414136	18
CELSR1	-0.458938	-0.420227	-0.923111	-0.858621	0.0471067	0.044284	0.717102	0.865657	0.441049	0.621839	38
CELSR2	-0.23053	-0.184355	-0.492843	-0.391339	-0.0244264	-0.0151714	0.402939	0.509945	0.264758	0.351832	54
CELSR3	-0.556104	-0.412437	-0.881325	-0.877438	0.112296	0.0325719	0.590974	0.619182	0.256248	0.377486	27
CENPB	-0.224896	-0.15824	-0.334936	-0.239495	1.58423	1.7949	0.670365	0.476397	-0.113629	-0.08128	16
CENPC	-0.130929	-0.143376	-0.392567	-0.312544	1.90487	1.84326	0.884211	0.452719	-0.161692	-0.291245	46
CENPE	0.0951369	0.16216	0.335847	0.276624	-0.257667	-0.17659	0.302505	0.284986	-0.0487965	-0.0314861	78
CENPF	-0.662304	-0.6867	0.122421	0.107924	0.576517	0.532841	-0.0183586	-0.0554994	-0.748084	-0.655103	265
CENPH	0.219413	0.157945	0.385278	0.411307	0.464099	0.501041	-0.129198	-0.164561	-0.826277	-0.743678	25
CENPI	-0.269938	-0.48902	-0.168397	-0.157247	1.0653	0.861032	0.292356	0.0669442	-0.317034	-0.203064	17
CENPJ	0.554768	0.607126	0.270834	0.0806035	-0.27243	-0.217043	-0.0181394	-0.0261757	0.052061	-0.111545	5
CENPK	0.334305	0.268678	0.457283	0.515321	0.554111	0.462622	-0.206165	-0.248391	-0.927299	-0.864122	15
CENPL	0.224648	0.396717	-0.367718	-0.241504	1.39458	1.39838	0.411101	0.231153	-0.576356	-0.516566	8
CENPM	1.30812	1.24708	-0.835829	-0.558193	0.280631	0.415185	0.0224311	-0.118878	-0.510169	-0.645723	7
CENPN	-0.593976	-0.75922	-0.536191	-0.292692	1.52512	1.50211	0.583792	0.384133	-0.0911053	-0.139852	15
CENPO	-1.04972	-0.834955	0.15271	0.398135	0.372415	0.418416	-0.11829	0.0259582	-0.718132	-0.515297	1
CENPP	-0.441871	-0.184374	-0.517362	-0.517601	2.2191	2.11568	1.08195	0.721537	-0.25249	0.108626	6
CENPQ	-0.748461	-0.637616	-0.987173	-1.00038	1.07439	1.09324	0.318921	0.102132	0.0258122	0.0419073	9
CENPT	-0.635886	-0.168885	-0.39303	-0.529322	1.34157	1.27296	0.556893	0.296588	-0.0298735	0.00542782	18
CENPU	-0.0353344	-0.211938	-0.66541	-0.608997	0.939295	0.971588	0.0788304	-0.0720897	0.100515	0.0091013	13
CENPV	-0.758334	-0.757038	-0.612854	-0.579776	0.873543	0.775027	0.0936803	-0.165765	0.164024	0.0755253	12
CENPW	0.119359	0.500166	-0.793475	-0.538475	1.58501	1.56791	0.704781	0.424622	-0.417958	-0.388477	1
CENPX	0.23594	0.307906	-0.285429	-0.286068	0.786142	0.795918	0.00773435	-0.259087	0.0666671	-0.189432	4
CEP104	1.17327	1.11635	0.282046	0.292104	-0.0617052	-0.301922	-0.106507	0.032371	-0.371222	-0.275018	7
CEP112	1.30693	1.34526	0.0330075	0.514764	-0.361566	-0.437922	0.0533492	-0.0506127	-0.379273	-0.561955	5
CEP120	-0.310887	-0.272536	-0.385557	-0.370292	0.180929	0.103021	0.483366	0.51571	-0.0578149	0.045379	20
CEP128	-0.265246	-0.283385	-0.215735	-0.174949	0.573513	0.359405	0.588157	0.656972	-0.444744	-0.120326	30
CEP131	-0.6648	-0.600038	-0.208684	-0.14712	-0.182298	-0.087381	0.217023	0.273436	0.939721	0.921059	94
CEP135	0.184933	0.16726	-0.0103265	-0.0373305	0.0425665	0.0490587	0.0943036	0.0809465	-0.714059	-0.644899	34
CEP152	0.380931	0.280288	-0.193173	-0.251067	0.192108	0.154213	0.293546	0.33353	-0.75649	-0.696725	39
CEP162	0.309288	0.287105	0.866902	1.00127	0.046116	0.0577429	-0.0472067	0.0214689	-0.22761	-0.127594	17
CEP164	-0.658831	-0.365793	-0.639969	-0.592613	0.0685194	0.181966	0.529257	0.752375	0.106872	0.375807	13
CEP170	1.09187	0.983089	0.932809	0.911783	-0.154796	-0.181282	-0.191136	-0.177917	0.0547322	-0.0987171	95
CEP170B	0.966973	0.894272	0.807865	0.773341	-0.3107	-0.329874	-0.166917	-0.189125	0.0416763	-0.154881	25
CEP19	-0.189747	-0.861825	-0.143461	-0.187382	0.380667	0.352394	0.804682	0.554951	-0.695477	-0.314026	1
CEP192	0.707765	0.568701	-0.1403	-0.199619	-0.0698604	0.0114649	0.0578955	0.119184	-0.666554	-0.613005	39
CEP250	0.440425	0.427085	0.0416123	-0.0689902	-0.0215675	-0.0870705	0.0478333	0.0783201	-0.473579	-0.451873	77
CEP290	-0.111524	-0.161269	-0.0732272	-0.0777257	-0.332469	-0.299485	-0.0329225	0.03819	0.291627	0.291729	80
CEP295	0.29665	0.128244	-0.240033	-0.231136	-0.166203	-0.136285	0.147804	0.19411	0.300291	0.167608	33
CEP350	0.216541	0.101322	-0.101136	-0.0809627	-0.220452	-0.186104	0.0257182	0.139161	0.217553	0.203607	77
CEP41	1.97217	1.69535	0.0517818	0.346973	-0.208781	-0.016152	-0.113685	-0.0818285	-0.291547	-0.338483	10
CEP44	1.78057	1.58738	0.026206	-0.010371	-0.492373	-0.488807	-0.00732966	-0.033658	-0.46046	-0.506333	24
CEP55	0.444461	0.319728	-0.255692	-0.262264	0.0365014	0.141625	0.377604	0.261255	-1.05591	-0.879298	26
CEP57	-0.22047	-0.301961	-0.926092	-0.929163	0.229086	0.163925	0.56929	0.581436	-0.0207867	0.100852	16
CEP63	-0.205231	-0.327541	-0.347422	-0.243405	0.463797	0.484894	0.623001	0.699165	-0.276002	0.0250666	13
CEP68	-0.276221	-0.147503	-0.717515	-0.809122	0.215137	0.0125941	0.328582	0.550182	0.231384	-0.0620968	2
CEP72	-0.410214	-0.42322	-0.159259	-0.18105	-0.190173	-0.136137	0.0767849	0.109751	0.40565	0.424527	38
CEP76	1.40868	1.35754	0.961759	0.920769	0.0393888	-0.00675733	-0.130027	-0.0369002	-0.416641	-0.245138	13
CEP78	0.615848	0.662965	-0.523226	-0.547353	-0.359228	-0.442162	-0.0250954	-0.0343696	0.261099	0.234556	18
CEP83	0.733333	0.510953	0.675013	0.669239	-0.113063	-0.0894923	-0.0699531	-0.031487	-0.424679	-0.428237	19
CEP85	2.14103	1.94837	0.996703	0.636805	-0.0780306	-0.198476	-0.0558865	-0.0609359	-0.382009	-0.379886	19
CEP89	-0.219257	-0.219702	-0.940093	-0.725471	0.0704714	0.0837969	0.450299	0.491182	0.0128387	0.131375	8
CEP95	0.652537	0.456799	-0.165744	-0.250429	-0.170594	-0.137724	0.203512	0.0917509	-0.0439469	0.164155	7
CEP97	1.55062	1.38137	0.00491356	-0.0631176	-0.4412	-0.537741	-0.0243995	-0.0156431	-0.156844	-0.202463	39
CEPT1	0.5084	0.763082	-1.11754	-1.7009	0.0346632	0.11914	0.1824	0.387381	0.0175395	-0.00296375	2
CERCAM	-0.321556	-0.435369	0.718039	0.836532	0.0849961	-0.0116211	0.153227	0.326468	-0.197163	-0.339216	11
CERK	-0.370991	-0.576891	-0.942377	-0.945055	-0.000212103	-0.0562708	0.682011	0.690999	0.737932	0.619888	15
CERS1	-0.653357	-0.244077	-0.855583	-0.804374	-0.189403	-0.0357081	0.446186	0.454414	0.0139798	0.234815	2
CERS2	-0.935881	-1.13907	-1.21373	-1.46726	0.202281	0.111195	0.318884	0.458584	0.0695837	0.107095	20
CERS5	-0.473406	-0.903372	-0.83312	-1.27219	0.185598	0.0709541	0.420122	0.408182	0.0406563	0.092007	4
CERS6	-0.706972	-0.728787	-0.726942	-0.832491	0.059142	0.0874425	0.405435	0.454128	0.151885	0.15283	9
CES1	-0.706553	-0.576857	0.993616	1.31747	0.112944	0.00646861	0.401891	0.205643	-0.185667	-0.366054	14
CES2	-0.622145	-0.491796	0.566102	0.954933	-0.949723	-0.578749	0.041747	0.317188	-0.0680967	0.329324	1
CES3	-0.400674	-0.258316	1.09229	1.25014	0.134686	-0.0462016	0.284803	0.452639	-0.424563	-0.449787	2
CETN2	0.292849	0.24276	-0.0898353	0.036923	0.407841	0.465214	-0.0834647	-0.111122	-0.226901	-0.290285	26
CETN3	-0.000642429	0.0537537	-0.0266039	-0.0285659	-0.165401	-0.0773771	0.12342	0.0835993	0.0598716	0.022206	31
CFAP20	0.416976	0.407783	0.355177	0.49717	0.0712726	0.149959	-0.295347	-0.401281	-0.295133	-0.361608	23
CFAP36	2.52921	2.47641	1.06206	1.12829	0.00436988	-0.166703	-0.192321	-0.161938	-0.362308	-0.557662	19
CFAP46	-0.380308	-1.01682	0.793015	0.598066	0.601991	0.551179	0.0181054	-0.110437	-0.281057	-0.368846	1
CFAP97	0.951749	0.856701	-0.00319457	-0.0556581	-0.391266	-0.537094	-0.230496	-0.167962	0.176749	0.0790929	4
CFD	0.0449536	0.0482888	0.131354	0.302626	0.124878	-0.0877569	0.266487	0.00399738	-0.0605449	0.0173657	3
CFDP1	0.308588	0.42744	2.38722	2.34984	0.181172	0.16803	-0.615948	-0.454025	-0.998814	-1.26999	25
CFH	-0.653636	-0.603728	-0.0352635	0.0625062	-0.00270851	-0.0628352	0.474209	0.364679	0.117282	0.124958	44
CFL1	2.57475	2.48763	1.44425	1.44415	-0.0875311	-0.082851	-0.18055	-0.11638	-0.370288	-0.367969	244
CFL2	1.7328	1.66072	0.774136	0.821146	-0.179605	-0.246059	-0.111594	-0.0704902	-0.259253	-0.118098	43
CFLAR	1.89362	1.72936	0.51673	0.503957	-0.566633	-0.839747	-0.0382953	-0.042123	-0.39135	-0.377406	6
CGA	0.173629	0.771211	0.446578	1.00652	-0.25192	-0.198364	0.0593931	0.453439	-0.579957	-0.0416093	1
CGAS	-0.906498	-1.06213	-1.44576	-1.41827	0.435406	0.32707	0.0497169	-0.0821547	0.349913	0.239428	35
CGGBP1	-0.0715585	-0.20246	1.27387	1.44454	0.00449232	0.0474052	-0.227114	-0.130956	0.229486	0.166547	24
CGN	0.445966	0.371965	0.0661042	0.105476	-0.197424	-0.00463447	-0.0640119	0.19155	-0.516421	-0.397046	13
CGNL1	-0.0345228	-0.348676	-0.424579	0.36574	0.919185	0.504646	0.460922	0.0595954	-0.0823658	-0.395222	1
CGREF1	-0.00530832	-0.276553	0.0617887	0.233926	-0.340863	-0.523867	0.0249935	-0.0319364	0.141576	0.0910485	29
CGRRF1	-0.15731	-0.419407	-0.576445	-0.434975	0.157759	0.0743669	0.401284	0.409531	0.0550859	0.0786775	7
CHAC2	2.44971	2.64966	1.63679	1.55695	-0.0515409	-0.277737	-0.0477877	-0.168743	-0.619121	-0.511119	9
CHAF1A	-0.978097	-1.05774	-0.265849	-0.249674	0.893199	0.936862	0.0999966	0.00957324	-0.0177512	-0.0457576	45
CHAF1B	-0.585606	-0.58787	0.308927	0.354101	0.713646	0.679797	-0.0531067	-0.147608	-0.112358	-0.200679	31
CHAMP1	-0.849103	-0.909433	0.4796	0.673884	1.09024	1.19165	0.00265199	-0.130893	-0.846699	-0.780478	68
CHCHD1	-1.11784	-1.24001	-0.284546	-0.113227	0.548575	0.727694	0.659795	0.951033	-0.549291	-0.38593	5
CHCHD10	-0.802905	-0.762455	-0.218129	0.474194	0.0486532	0.284279	0.125971	0.143269	-1.11687	-0.900681	1
CHCHD2	-1.61469	-1.63709	-0.206266	-0.0930697	0.0758562	0.235549	0.0776639	0.293113	-1.10297	-1.09739	7
CHCHD3	-0.702977	-0.707445	-0.971061	-0.836245	0.863944	0.807506	1.20702	1.23757	-0.0637445	0.0790586	117
CHCHD4	-0.815216	-0.618391	-0.235635	-0.119583	0.678064	0.671015	0.871365	0.904459	-0.397906	-0.37905	30
CHCHD5	-2.47869	-2.27187	0.0858063	0.441703	0.159474	0.371716	0.00184006	-0.0109327	-1.81671	-1.90694	3
CHCHD6	-1.03701	-1.08227	-1.20101	-1.30588	0.572466	0.59127	1.06938	1.07678	0.0459979	0.0298827	8
CHCHD7	-0.46544	-0.421361	-0.218572	-0.0719307	0.394914	0.443029	0.155587	0.305806	-0.509951	-0.455606	8
CHD1	-0.558132	-0.463341	-0.342709	-0.285991	0.898003	0.912121	0.638478	0.560147	-0.106351	-0.00435497	84
CHD1L	-0.524645	-0.44541	0.376534	0.419997	-0.393595	-0.418465	0.166375	0.168679	0.0501322	0.0314962	46
CHD2	-0.283745	-0.306238	-0.50401	-0.459893	1.40841	1.44604	0.354319	0.383408	-0.237363	-0.0760406	61
CHD3	-0.754699	-0.652422	-0.42557	-0.476929	0.405326	0.50424	-0.0733111	-0.087262	1.12873	0.89507	130
CHD4	-0.789745	-0.751929	0.400862	0.380675	0.685093	0.688219	-0.127918	-0.147557	-0.114184	-0.103618	207
CHD6	-0.598202	-0.516851	-0.619668	-0.669974	0.158553	0.167896	-0.0337409	-0.0544546	1.30502	1.19502	52
CHD7	-1.07984	-1.00501	-1.02732	-0.99067	0.558174	0.608109	-0.0272679	-0.0650637	0.1963	0.216087	62
CHD8	-0.465385	-0.475403	1.16444	1.22831	0.0232511	0.0305856	-0.0552118	0.00306167	-0.00325566	0.0174178	97
CHD9	-0.758043	-0.719177	0.567315	0.637755	0.0914505	0.0891694	-0.054348	-0.0230092	-0.0525648	-0.0396226	58
CHDH	-0.246994	-0.4889	-0.380882	-0.115564	0.681861	0.641545	1.01026	1.11764	-0.225602	-0.0317042	17
CHEK1	0.620156	0.706453	0.104012	0.0888758	-0.521667	-0.487676	-0.00430518	-0.0422612	-0.212565	-0.41401	21
CHEK2	-0.479581	-0.623293	0.463338	0.424257	-0.44784	-0.475051	0.191061	0.242893	0.075699	-0.0195157	31
CHERP	-0.735954	-0.611283	-0.188611	-0.0883595	0.83029	0.779453	-0.113028	-0.187571	0.0995621	0.0636387	50
CHFR	0.0914712	-0.12014	1.64957	1.55527	-0.0392519	0.0128098	-0.157666	-0.0672547	0.269521	0.0614129	7
CHIC1	1.08977	1.50268	0.461545	0.864489	-0.400344	-0.296971	-0.592281	-0.168299	-0.0528104	0.140155	1
CHID1	-0.827639	-0.942713	0.357174	0.704985	0.0960066	0.0597173	0.101097	0.164412	-0.144919	-0.215278	20
CHKA	1.56828	1.55847	0.703855	0.730181	-0.27787	-0.37884	-0.0672414	-0.0397465	-0.379199	-0.357425	14
CHKB	0.615737	0.658218	0.278547	0.338595	-0.0727427	-0.147759	-0.000204646	-0.092127	-0.14629	-0.0550905	7
CHL1	-0.635602	-0.466541	-1.03102	-0.772479	0.0620635	0.0818524	0.756106	0.868156	0.735094	0.830437	27
CHM	2.38474	2.23798	1.03416	1.06182	-0.334177	-0.299005	-0.0941976	-0.0550313	-0.435397	-0.208569	13
CHML	2.24383	2.0257	0.951818	0.804455	-0.227462	-0.302446	-0.0928188	0.000487205	-0.405952	-0.349525	27
CHMP1A	1.95331	1.62708	1.01899	0.856127	-0.272633	-0.375773	0.0343263	-0.0898389	-0.42982	-0.246382	9
CHMP1B	2.01019	1.68406	1.14794	1.27019	-0.1899	-0.15201	-0.159585	-0.0139354	-0.5653	-0.581451	10
CHMP2A	1.33883	1.24663	0.950516	0.888817	-0.188709	-0.20684	-0.0828801	-0.0355642	-0.329948	-0.39405	45
CHMP2B	2.84219	2.78064	0.825791	1.01954	-0.383149	-0.493791	-0.115272	0.0280363	-0.416436	-0.480345	16
CHMP3	1.91085	1.69083	0.883847	0.863133	-0.510198	-0.525186	-0.185312	0.066738	-0.335895	-0.149373	3
CHMP4A	1.41156	1.48359	0.739385	0.696511	-0.45076	-0.198795	-0.244019	-0.12546	-0.779058	-0.342441	10
CHMP4B	2.56437	2.45343	1.56882	1.50492	-0.227077	-0.257542	-0.0968267	-0.122333	-0.428047	-0.510385	58
CHMP4C	2.18674	1.99382	1.11125	1.05946	-0.266075	-0.219888	0.031209	-0.139488	-0.40096	-0.238801	8
CHMP5	2.64542	2.50913	1.44096	1.48085	-0.0509285	-0.0333545	-0.24941	-0.060489	-0.434926	-0.332596	31
CHMP6	-0.137349	-0.202033	-0.611587	-0.298631	-0.037151	-0.157776	0.688744	0.676779	0.57292	0.590364	11
CHMP7	2.64098	2.45548	0.140082	0.178033	-0.170972	-0.181906	-0.0739435	-0.0344472	-0.615237	-0.430587	27
CHN1	1.69473	1.44176	0.768725	0.675273	-0.180528	-0.321936	-0.120842	-0.0876298	-0.463176	-0.321325	20
CHORDC1	2.2569	2.17669	0.966143	0.911611	-0.378427	-0.376964	-0.0908203	-0.0312419	-0.395682	-0.33465	69
CHP1	-0.51729	-0.626306	-0.968596	-0.842412	0.0777117	0.102134	0.500092	0.558815	0.144842	0.243506	39
CHPF	-0.787177	-0.577082	-1.08509	-1.26441	0.132296	0.0142882	0.745546	0.758919	0.272048	0.416975	20
CHPF2	-1.02182	-0.963277	-0.982557	-0.914914	0.0930225	0.0225637	0.853907	0.905942	0.354304	0.441126	30
CHPT1	-0.824447	-0.783684	-0.608632	-0.488129	-0.0219905	0.168575	0.533195	0.698078	0.472747	0.419126	1
CHRAC1	0.650509	0.640516	0.673871	0.486048	0.00427534	0.00481509	-0.125312	-0.0624692	-0.282214	-0.340943	10
CHRNA5	-1.14359	-1.25108	-0.178246	-0.0132899	0.0998396	0.0616258	0.571268	0.62253	-0.130923	0.0689608	5
CHST10	0.399637	0.18394	-0.750116	-0.789782	-0.0199457	-0.0656493	0.534534	0.683338	0.309141	0.190661	1
CHST11	-0.0653061	-0.161819	-0.593556	-0.649638	0.353753	-0.00610555	0.602783	0.618687	-0.0956089	0.137445	2
CHST12	-0.418041	-0.340323	-1.12545	-1.02648	0.0917983	0.027728	0.746361	0.676623	0.375172	0.322579	16
CHST13	-0.218635	-0.36176	-1.12446	-0.888641	-0.00365675	0.19844	1.16075	1.28142	0.853913	0.428894	3
CHST14	-0.861532	-0.646827	-1.0989	-0.943329	0.0437102	0.0591825	0.819884	0.839074	0.406431	0.385907	33
CHST15	-0.575936	-1.04399	-2.68296	-1.97571	0.0766946	0.0698899	0.887149	1.06368	0.7697	0.750126	1
CHST3	-0.39208	-0.443514	-0.974167	-0.889451	0.0620406	0.0549796	0.761714	0.940421	0.543076	0.701523	12
CHSY1	-0.108529	-0.0635246	-0.758001	-0.794473	0.0378753	-0.0121463	0.626305	0.617188	0.198083	0.240666	21
CHSY3	-0.207886	-0.347342	-0.676648	-0.6758	0.0667602	0.0210858	0.832038	0.819083	0.287812	0.313011	33
CHTF18	-0.466598	-0.689926	0.290763	0.40282	-0.140146	-0.123593	0.040967	0.110274	-0.0472335	0.0695823	41
CHTF8	-0.412396	-1.0057	1.10329	1.25566	0.0314156	0.0134615	-0.133675	0.0527459	-0.12622	0.0270861	9
CHTOP	-0.921723	-0.636309	-1.0201	-0.921947	0.933649	1.10105	0.05752	0.00653023	0.16981	0.147508	25
CHUK	2.15272	2.09251	0.324535	0.1974	-0.433377	-0.427982	-0.0120228	-0.0425358	-0.285182	-0.429962	30
CIAO1	1.49781	1.36436	0.438716	0.554412	-0.418461	-0.479702	-0.128113	-0.0168119	-0.271232	-0.172389	19
CIAPIN1	2.16997	2.1578	1.09453	1.16168	-0.192392	-0.249887	-0.0890626	-0.0876805	-0.375004	-0.402292	42
CIB1	-0.283823	-0.311223	-0.920047	-0.643919	0.0218505	0.0116188	0.549386	0.603046	0.331141	0.478558	16
CIC	-0.206152	-0.419796	1.26876	1.43231	0.393741	0.374649	-0.113522	-0.123022	-0.163386	-0.145749	40
CINP	1.96526	1.80006	-0.000646037	-0.124772	-0.657045	-0.759119	-0.421441	-0.547919	0.386973	0.116744	12
CIP2A	2.26937	2.07577	-0.0278543	0.0089739	-0.311956	-0.396301	0.037132	-0.0869854	-0.239166	-0.29214	38
CIR1	-0.709682	-0.890277	0.552279	0.471662	0.16862	0.213856	-0.0215902	-0.0707414	-0.127454	-0.139601	12
CIRBP	-0.541897	-0.555294	-0.192228	-0.0451667	0.0897213	0.252242	-0.439553	-0.22192	0.664069	0.567457	49
CISD1	-0.353129	-0.21622	-0.894323	-0.85991	0.487328	0.522693	0.873651	0.909118	-0.0963228	0.0248506	58
CISD2	-0.505335	-0.417508	-0.907028	-0.838553	0.103806	0.100123	0.360621	0.433811	0.0426073	0.0904045	28
CISD3	-0.718336	-0.645358	-0.659858	-0.704547	0.722283	0.727342	0.800561	0.705664	0.00450582	0.0632423	6
CIT	-0.22382	-0.189914	-0.137815	-0.128431	0.181243	0.314145	0.598571	0.490015	-0.715798	-0.692224	150
CIZ1	-0.313745	-0.170783	0.623318	0.495522	0.770625	0.800415	-0.0675493	-0.194182	-0.47832	-0.404989	21
CKAP2	-0.626065	-0.64312	-0.34619	-0.3512	0.0600851	0.0112514	0.239837	0.184946	0.301588	0.198241	31
CKAP2L	-0.48793	-0.369635	-0.328993	-0.272469	0.28572	0.302729	-0.139027	-0.16178	0.775874	0.581823	13
CKAP4	-1.22295	-1.15165	-1.45914	-1.45547	0.149046	0.0977143	0.617133	0.758016	0.0780995	0.182211	234
CKAP5	0.253838	0.23631	0.120509	-0.0105717	-0.601897	-0.616583	0.143311	0.130675	0.0513092	-0.0181441	217
CKB	2.54954	2.43223	1.2095	1.26335	-0.110108	-0.135525	-0.225884	-0.186598	-0.487712	-0.38005	242
CKLF	-0.992635	-1.28948	-1.31841	-1.15844	0.163296	-0.0167113	0.717245	0.659385	0.635301	0.452477	2
CKM	3.84799	3.76731	1.20544	1.32059	-0.0400013	-0.0264289	-0.37513	-0.244894	-0.506163	-0.568692	4
CKS1B	2.6759	2.68814	1.32519	1.41734	0.0116614	-0.0573013	-0.369726	-0.375479	-0.423203	-0.275225	15
CKS2	1.70985	1.6732	0.685382	0.751547	0.0492848	-0.272879	-0.0156933	-0.205785	-0.56349	-0.502065	10
CLASP1	1.52125	1.47992	-0.028636	-0.206771	-0.390525	-0.591415	0.242177	-0.0690036	0.00538382	-0.273409	98
CLASP2	1.63466	1.55703	-0.109454	-0.167391	-0.500224	-0.550933	0.118146	-0.0275971	-0.000382035	-0.250546	71
CLASRP	-0.618577	-0.421417	0.994581	1.1518	0.564283	0.764749	-0.128726	-0.0994486	-0.413872	-0.473578	12
CLC	0.312162	3.72188	-0.195676	0.00506743	-1.74691	0.22022	-2.83567	-1.74966	-1.72134	0.277519	1
CLCC1	-1.21998	-1.13719	-1.73171	-1.57955	0.0781278	0.090798	0.590206	0.686679	0.278519	0.2253	43
CLCN2	-0.644705	-0.642241	-1.31573	-1.41222	0.0433744	0.0486485	0.721485	0.829361	0.696022	0.739457	9
CLCN3	-0.139089	-0.196345	-0.515548	-0.594032	-0.202337	-0.20385	0.534929	0.70356	1.05895	1.0179	20
CLCN4	0.90237	0.747469	-0.178688	-0.12687	-0.518546	-0.254809	-0.22628	-0.0210939	0.162857	0.0660344	2
CLCN5	-0.697949	-0.399803	-0.932145	-0.193944	-0.0803172	-0.0727748	0.2023	0.467593	0.635262	0.464524	9
CLCN6	0.120062	-0.0106208	-0.637699	-0.733135	-0.0565219	-0.180868	0.367961	0.546259	0.74566	0.808746	16
CLCN7	-0.163305	-0.101717	-0.428966	-0.510616	-0.010564	-0.0687917	0.543376	0.629221	0.639734	0.694468	44
CLDN1	-0.345961	-0.115227	-0.598601	-0.674122	-0.295114	-0.333727	0.148718	0.275551	0.498202	0.444822	7
CLDN12	0.893448	0.874556	0.203947	0.320068	-0.336119	-0.238425	-0.331198	-0.0782761	0.00321688	0.0841282	1
CLDN3	-0.288391	-0.348587	-0.836569	-0.827695	0.120558	0.0260264	0.840125	0.885965	1.16148	1.12762	3
CLDND1	-0.293542	-0.142797	-1.05466	-0.660023	-0.00984082	0.0283076	0.924525	1.04955	0.88081	1.03645	13
CLEC11A	1.20137	1.29324	-0.776802	-0.766427	0.123615	0.0957406	0.146887	0.687973	-0.578526	-0.541811	2
CLEC16A	1.1004	1.01256	-0.0631639	-0.246569	-0.570253	-0.497085	-0.00724055	-0.0400632	0.0840224	0.0488046	33
CLEC3B	1.26222	0.975604	1.62033	1.68685	-0.18534	-0.219543	0.184249	-0.319645	-0.446622	-0.665647	5
CLGN	-1.36209	-1.50682	-1.94504	-1.85043	0.0943952	0.0914684	0.591421	0.682916	0.203864	0.20408	77
CLIC1	1.91708	1.74088	1.25314	1.12892	-0.255741	-0.160979	-0.110795	-0.0366423	-0.361082	-0.312943	90
CLIC2	0.603665	0.680514	0.983623	0.812034	-0.116455	-0.118275	-0.196537	-0.134432	-0.337654	-0.243593	11
CLIC3	1.66893	1.50305	0.310407	0.23651	-0.435653	-0.226835	-0.00688128	0.0252866	-0.00669135	-0.156458	10
CLIC4	1.64024	1.67824	1.12462	1.11869	-0.514228	-0.559606	-0.139421	-0.00945424	-0.1501	-0.216862	86
CLINT1	0.259551	0.259939	-0.0883324	-0.111515	-0.67176	-0.737562	-0.0803387	0.0463813	0.621083	0.411863	67
CLIP1	2.73385	2.575	1.21257	1.14859	-0.0803552	-0.13135	-0.106158	-0.116601	-0.500726	-0.464217	133
CLIP2	2.14502	2.07948	0.649479	0.618806	0.0200483	0.0270296	-0.43875	-0.332872	-0.320592	-0.451769	12
CLIP4	-0.246455	-0.422428	-0.032696	-0.29318	0.0897481	0.0375208	0.312163	0.481326	-0.247016	0.0228559	3
CLK1	0.2309	-0.184021	0.254577	0.30129	0.422208	0.467794	-0.191757	-0.120457	-0.0618519	-0.140362	12
CLK2	-0.678714	-0.763898	0.167448	0.372454	1.01192	0.672388	0.00378742	-0.203139	-0.492249	-0.213838	5
CLK3	-0.0499891	-0.14221	0.972883	1.21731	0.410475	0.434564	-0.196004	-0.10852	-0.235732	-0.50316	14
CLK4	-0.723894	-0.675002	-0.359039	-0.152145	0.986142	1.02624	0.115697	0.0605844	0.00725882	0.0239774	12
CLMN	-1.26248	-1.06957	-0.407536	-0.440724	0.251815	0.151067	0.089834	0.317534	0.369302	0.279831	4
CLMP	-0.978533	-0.534574	-1.48569	-0.982216	0.0152669	0.0267485	0.987163	1.2545	0.903904	0.951112	13
CLN5	-0.885938	-0.68836	0.740488	0.829581	-0.655808	-0.562498	0.159772	0.217994	0.121143	0.0863284	9
CLNS1A	2.30606	2.44046	1.49378	1.39164	-0.124959	-0.345274	-0.139632	-0.0866486	-0.267452	-0.33559	23
CLOCK	-0.142443	-0.290515	0.738049	0.743623	0.0335521	0.194835	-0.0346428	0.0458556	-0.190711	-0.117807	9
CLP1	-0.339087	-0.338217	1.44802	1.49383	0.00932211	0.0872045	-0.0993855	-0.0170605	0.020836	0.054196	18
CLPB	-1.05373	-0.814977	-0.216057	-0.156481	0.318537	0.345028	0.450933	0.579507	-0.135659	-0.0524771	78
CLPP	-1.42995	-1.28454	-0.0117724	0.296363	0.136063	0.0920743	0.161203	0.10838	-1.08027	-0.942957	53
CLPTM1	-1.26829	-1.29505	-1.52511	-1.32833	0.107455	0.119321	0.540133	0.60385	0.135996	0.206287	38
CLPTM1L	-0.905706	-0.925306	-1.42038	-1.30873	0.136228	0.12101	0.466246	0.525786	0.0501282	0.0950726	83
CLPX	-1.24989	-1.32089	-0.0928541	0.143961	0.105393	0.0907891	0.24953	0.212467	-1.17171	-1.10968	68
CLSPN	0.0137348	0.103801	1.10536	1.25943	0.467024	0.516571	-0.0535685	-0.134956	-0.767621	-0.765557	45
CLSTN1	-0.166518	-0.0756701	-0.892444	-0.85125	0.0347607	0.0507729	0.425718	0.51524	0.238744	0.347444	23
CLSTN3	-0.425893	-0.471953	-0.51733	-0.479302	0.0856163	-0.0846509	0.634486	0.810943	0.394342	0.564249	6
CLTA	0.777633	0.811938	0.345287	0.243447	-0.513279	-0.41765	-0.188341	-0.0643969	0.0524434	0.00791917	74
CLTB	0.77083	0.649384	0.316431	0.192473	-0.511884	-0.531424	-0.199642	-0.0816399	0.0408161	0.0369305	23
CLTC	0.567892	0.546284	0.4176	0.34722	-0.475995	-0.464453	-0.141697	-0.0695331	0.0634753	-0.0190222	733
CLTCL1	0.477651	0.297389	0.471346	0.389291	-0.359862	-0.439027	-0.119853	-0.0834197	0.0109158	-0.0764125	21
CLU	-0.494524	-0.459496	-0.206433	-0.0857725	-0.00671521	0.0191579	0.384226	0.372177	0.0366696	0.0803161	173
CLUAP1	0.98336	1.01066	0.367916	0.484175	-0.447489	-0.257984	-0.137417	-0.0880996	0.0251723	-0.118563	6
CLUH	1.54231	1.53225	1.19489	1.08195	-0.265483	-0.329402	-0.151104	-0.113482	-0.130756	-0.137026	147
CLYBL	-1.17664	-1.10383	0.128378	0.440536	0.0915682	0.0726974	0.155336	0.137164	-0.916668	-0.984293	24
CMAS	-0.0699567	-0.30423	0.415752	0.539645	0.00618885	0.0377634	-0.356023	-0.209966	0.748521	0.615132	44
CMBL	3.12605	3.2047	1.73776	1.64903	0.0337164	-0.147438	-0.247064	-0.305824	-0.488316	-0.385699	38
CMC1	-1.75847	-1.8121	-0.224784	0.0647351	0.105142	0.167465	0.569429	0.768281	-1.28748	-0.934308	9
CMC2	-0.251837	-0.32256	-0.252721	-0.210071	0.501297	0.562887	0.826354	0.829969	-0.119949	-0.00702421	7
CMC4	-1.0606	-1.43446	0.467406	0.470496	0.694955	0.696779	0.247296	0.314141	-1.42636	-0.890083	6
CMIP	1.54017	1.44635	-0.134682	-0.180155	-0.466752	-0.600523	0.0820235	0.116678	0.0299614	-0.0757708	13
CMPK1	2.98961	2.92762	1.77036	1.63673	0.0152198	-0.00241662	-0.224823	-0.319123	-0.648456	-0.586674	86
CMSS1	-0.850479	-1.48527	-0.605233	-0.679481	0.0421304	0.104454	0.0593016	0.0646543	1.12917	0.909616	23
CMTM4	-0.703717	-0.554805	-0.145283	-0.0703503	-0.0113497	0.0287074	0.444573	0.658558	0.0870308	0.172623	6
CMTR1	-0.359757	-0.149795	1.28127	1.37035	0.0163123	0.0984046	-0.0698089	-0.0364047	-0.0148695	-0.0255258	76
CMTR2	0.515365	0.611605	0.739299	0.950054	0.00328007	-0.0412404	-0.101401	-0.16329	-0.214117	-0.169688	10
CNBP	1.0574	1.01452	0.538945	0.515413	-0.880651	-1.00308	-0.86677	-0.929251	0.0717801	0.0887188	76
CNDP2	2.40228	2.23826	1.16025	1.11253	-0.123113	-0.0345726	-0.317067	-0.296144	-0.223605	-0.239631	75
CNEP1R1	-1.04708	-1.18782	-1.09829	-1.15913	0.455328	0.349132	0.0698696	0.199471	0.0436111	0.0437339	3
CNIH1	-0.153665	0.142103	-0.33068	-0.246396	0.104702	-0.172912	0.516249	0.610373	0.35675	0.390684	3
CNIH4	0.108035	0.186374	-0.242449	-0.186981	0.082642	-0.0495754	0.0972639	0.132595	0.0974358	0.106946	6
CNKSR1	2.25738	2.08639	0.491689	0.52555	-0.205084	-0.281944	-0.067131	-0.0252007	-0.351853	-0.499466	5
CNKSR2	-1.00543	-1.06558	0.707786	1.65084	0.867204	-0.354303	0.776217	0.23637	-0.25914	-0.637189	1
CNN2	2.21886	1.99256	0.628286	0.602898	-0.59246	-0.522431	-0.0747266	-0.0841492	-0.46451	-0.532612	45
CNN3	1.8398	1.73679	1.18789	1.15534	-0.165282	-0.362764	-0.0209875	-0.156556	-0.600925	-0.632204	43
CNNM1	-0.840615	-0.904051	-1.24914	-1.85157	0.121837	0.11346	0.817587	0.840296	0.371302	0.413835	6
CNNM2	-0.968844	-0.886735	-1.05417	-1.02931	0.105194	0.0166912	0.653628	0.693986	0.293277	0.358655	17
CNNM3	-1.15239	-1.12638	-1.69584	-1.79426	0.0984948	0.0577423	0.893146	1.00569	0.447202	0.562221	40
CNNM4	-0.917478	-0.9638	-1.34836	-1.26534	0.122177	0.0474292	0.772208	0.858284	0.275117	0.370651	26
CNOT1	-0.549195	-0.569773	-0.0823123	-0.133789	-0.558221	-0.497279	0.163157	0.221375	0.268406	0.229713	220
CNOT10	-1.04441	-0.945219	0.033336	-0.145303	-0.597928	-0.563524	0.0840114	0.143589	0.349917	0.302574	48
CNOT11	-0.929433	-0.779459	-0.0541268	-0.167019	-0.752156	-0.737617	0.0493104	0.219088	0.263517	0.19666	12
CNOT2	-0.511541	-0.514814	0.556842	0.634961	-0.440947	-0.487639	-0.074062	-0.0650548	0.315018	0.207725	30
CNOT3	-0.045557	-0.132545	0.67496	0.52652	-0.379029	-0.294965	-0.0752045	-0.0444998	0.100822	0.136537	32
CNOT4	1.63645	1.53377	1.23778	1.15626	-0.0627518	-0.235029	-0.0423682	-0.0833709	-0.486779	-0.611885	24
CNOT6	-0.694552	-0.501499	0.0867774	0.00434808	-0.344882	-0.221669	0.0676714	0.0556875	0.418016	0.22389	16
CNOT6L	0.0971849	0.0464693	0.308252	0.225119	-0.485847	-0.484556	-0.0455296	0.0317772	0.299379	0.144242	21
CNOT7	-0.479001	-0.39287	0.168547	0.239817	-0.490456	-0.500212	-0.00806269	0.00562759	0.221488	0.244886	40
CNOT8	-0.544229	-0.564445	0.109937	0.0240973	-0.648918	-0.757168	0.074006	0.0678721	0.0972624	0.0899489	16
CNOT9	-0.402963	-0.522819	-0.0906152	-0.0996138	-0.424457	-0.413054	0.128002	0.176133	0.295671	0.158604	18
CNP	-0.486417	-0.390975	-0.211541	-0.155889	-0.214505	-0.239618	0.376871	0.46144	0.511049	0.641896	114
CNPY2	-0.448298	-0.133329	0.0222015	-0.00797421	-0.413884	-0.519465	0.0637232	0.132088	0.130663	-0.391997	4
CNPY3	-0.0930689	-0.296549	0.731348	0.860623	0.0541644	0.0372615	0.172782	0.177396	-0.492428	-0.258991	25
CNPY4	-0.716194	-0.728348	0.937253	1.14391	0.0846484	0.0396242	0.442681	0.320085	-0.62273	-0.585956	24
CNR1	0.180053	0.245956	-1.23153	-1.03909	-0.079218	0.140463	0.970312	1.59622	1.8466	1.89849	1
CNRIP1	0.407994	0.70507	0.891659	0.558024	-0.484196	0.15838	-0.251956	-0.0905002	0.0677298	-0.241026	3
CNST	-0.411407	-0.378029	-1.05327	-0.8546	0.0641128	0.0649984	0.515388	0.587652	0.227077	0.237068	28
CNTLN	0.76772	0.783855	-0.305565	-0.389558	-0.572699	-0.587545	-0.0796412	-0.0781797	0.571902	0.365897	55
CNTNAP1	-0.937198	-0.909458	-0.990778	-1.06622	0.0948966	0.0772606	0.584604	0.67344	0.143076	0.261726	78
CNTNAP3	-0.0198521	0.0264697	-0.0904826	0.368373	-0.322635	-0.0256501	0.0507438	-0.0754017	0.143528	0.0967648	1
CNTNAP3B	-0.304497	-0.459023	-1.26441	-0.595702	-0.00429993	0.150884	0.338672	0.437077	0.139834	0.251916	1
CNTNAP4	-0.666747	-0.535967	-0.581305	-0.260135	0.219953	0.599106	-0.22563	-0.156699	0.85649	1.07112	8
CNTRL	0.841527	0.845588	-0.0939397	-0.15135	-0.0778005	-0.174995	0.0612022	0.122971	-1.04323	-1.00328	12
CNTROB	0.183899	0.213389	-0.18447	-0.0840157	0.102749	0.266359	0.324927	0.388448	-0.676551	-0.717396	18
COA1	-1.43698	-1.38058	-1.396	-1.44685	0.528715	0.470611	0.955658	1.08402	-0.0491384	0.13141	14
COA3	-1.51317	-0.994893	-1.71097	-1.56559	0.679632	0.607586	1.23862	1.33926	-0.071995	0.134001	13
COA4	-0.0974125	-0.216771	0.380331	0.211801	0.532981	0.635895	0.0390036	-0.277104	-1.38016	-0.830895	10
COA5	-0.492361	-0.673551	0.658057	0.879248	0.0188675	0.103234	0.00649695	-0.0478909	-0.264163	-0.421984	3
COA6	-2.1029	-2.14547	0.311036	0.349339	0.342718	0.316185	0.0474772	0.0959752	-0.998337	-0.845415	10
COA7	-1.48099	-1.57786	0.0947966	0.0518496	0.201155	0.381411	-0.00842454	0.128736	-0.930668	-0.864203	39
COASY	0.65015	0.662053	0.429911	0.41674	-0.159015	-0.187264	-0.0106016	0.0343246	-0.615425	-0.477685	35
COBL	-0.605674	-0.587257	0.129797	0.101673	-0.203026	-0.235798	0.106964	0.193836	0.0486716	0.0982072	69
COBLL1	0.672264	0.65911	0.838125	0.77521	-0.530201	-0.580648	-0.206811	-0.100587	-0.0103561	0.0106882	78
COCH	-0.406718	-0.202675	0.361618	0.565179	-0.171445	-0.237394	0.215582	0.152987	-0.0372899	0.0272338	4
COG1	0.91824	0.877271	-0.0701621	-0.245032	-0.720672	-0.734881	0.0309481	0.0408291	-0.00655635	-0.116176	48
COG2	0.819946	0.622782	-0.0420112	-0.259562	-0.728258	-0.870669	0.0294183	0.00380836	0.078805	-0.0169944	48
COG3	0.801235	0.838354	-0.000482187	-0.203236	-0.65242	-0.750512	-0.0236985	-0.0436813	0.0409484	-0.0817209	55
COG4	0.908795	0.810946	-0.0501165	-0.168716	-0.573156	-0.60842	0.026308	0.0176865	-0.00531322	-0.11887	77
COG5	1.04569	1.00991	-0.110596	-0.193704	-0.557313	-0.515297	-0.0432513	-0.0211922	-0.0225689	-0.0880797	44
COG6	1.06412	1.06365	0.187391	-0.0258812	-0.714516	-0.725782	-0.0600793	-0.0553962	-0.0120556	-0.141524	38
COG7	1.27578	1.10996	-0.0190789	-0.12193	-0.545129	-0.561737	-0.0103917	-0.00588495	0.00772334	-0.18428	57
COIL	-0.577996	-0.623808	-0.202735	-0.11393	1.08716	1.14871	0.129281	0.0045398	-0.0773379	-0.138726	36
COL12A1	-0.661579	-0.583286	0.215047	0.415718	-0.0432226	-0.11271	0.197657	0.230952	-0.0304158	0.0752027	198
COL14A1	-0.80284	-0.72789	-0.122962	0.00606761	-0.30041	-0.382102	0.223018	0.152116	0.0794282	0.141921	77
COL15A1	-0.633593	-0.54596	-0.204105	-0.12482	-0.138383	-0.148653	0.381979	0.421527	0.133101	0.176792	34
COL18A1	-0.181162	0.18781	-0.351366	-0.208999	-0.296047	0.029274	0.114965	0.431804	0.195401	0.306627	5
COL1A1	0.408313	0.450724	0.177246	0.426019	-0.229744	-0.292835	-0.0132474	-0.0245082	-0.18441	-0.283422	13
COL1A2	0.989007	1.03701	-0.176743	-0.1541	-0.660428	-0.680245	0.0554783	0.217164	0.00927734	0.00979198	3
COL25A1	-0.199985	-0.649886	-0.892231	-0.659821	-0.0106004	-0.134232	0.23071	0.589013	0.317253	0.234722	5
COL2A1	-0.192845	0.150268	-0.241061	0.197321	-0.403118	-0.381198	0.0715384	0.375603	0.0463267	0.11664	3
COL3A1	-0.916898	-0.825955	0.702954	1.08883	0.103128	0.0434207	0.3006	0.235733	-0.273535	-0.336409	79
COL4A1	-0.943664	-0.802213	-0.316387	-0.4631	0.120049	0.0493203	0.304776	0.200737	0.20181	0.188521	10
COL4A2	-1.14122	-0.924821	-0.214241	-0.134729	0.0198872	0.00230536	0.308338	0.303826	0.103407	0.15564	39
COL4A3	-0.170354	-0.28996	-0.247804	0.0463189	0.0856105	0.0679292	0.279996	0.340608	-0.0337883	-0.0894437	3
COL4A3BP	1.98493	1.77269	0.0321524	0.0793672	-0.544639	-0.394805	-0.0921457	0.057507	-0.390446	-0.154676	37
COL4A4	-0.67267	-1.01977	0.154453	0.402849	0.0589309	0.059651	0.377127	0.282013	-0.252128	-0.115527	10
COL4A5	0.399411	0.469173	0.617843	0.825662	-0.0197205	-0.249715	0.342149	-0.152114	-0.178484	-0.217304	1
COL4A6	-0.524566	-0.508939	-0.083433	-0.0379659	-0.166567	-0.21864	0.341739	0.267238	0.108267	0.0361994	3
COL5A1	-0.585395	-0.517063	-0.152931	-0.0211358	-0.0272561	-0.186749	0.0385442	0.0491994	0.188703	0.247784	88
COL6A1	0.148226	0.0740575	0.563318	0.645966	0.0247406	0.0859717	0.181287	0.154754	-0.417194	-0.329226	6
COL6A2	0.41734	0.280945	-0.210586	-0.875741	-0.135337	-0.311013	0.566825	0.707655	-0.0117505	0.672968	1
COL6A3	0.768848	0.756526	-0.471436	-0.134803	-0.133404	-0.185515	0.251224	0.137635	-0.529475	-0.125382	2
COL7A1	-0.497577	-0.377894	-0.202214	-0.0530094	-0.0427962	-0.110481	0.143341	0.179113	0.0604736	0.15703	96
COL8A1	-0.565573	-0.588296	-0.456473	-0.577758	0.115384	0.0152839	0.409122	0.504436	0.213597	0.237554	12
COLGALT1	-0.925353	-0.89309	-0.173395	0.0387843	0.0271968	-0.0703817	0.239079	0.23376	0.0190277	0.109935	116
COLGALT2	-1.13894	-1.13652	-0.414366	-0.269889	0.0380466	-0.109896	0.42073	0.345216	0.043314	0.121736	4
COMMD1	1.2999	1.18827	0.490323	0.476168	-0.546836	-0.498789	-0.145	-0.160183	0.0254572	-0.0900223	18
COMMD10	1.49061	1.47744	0.648035	0.556232	-0.519289	-0.377377	-0.113325	-0.116379	0.0150057	-0.16058	19
COMMD2	1.16624	1.19332	0.454139	0.291134	-0.185307	-0.389663	-0.135283	-0.0384333	-0.166453	-0.329404	11
COMMD3	1.36076	1.309	0.4473	0.388828	-0.661074	-0.765286	0.012529	-0.104861	-0.289111	-0.315833	1
COMMD4	1.37517	1.33493	0.369173	0.369634	-0.613001	-0.542891	-0.0826641	-0.0709725	-0.0719384	-0.0666467	17
COMMD5	1.59904	1.53767	0.583014	0.494943	-0.447093	-0.486598	-0.077506	-0.124576	0.0221522	-0.0843754	16
COMMD6	1.50144	1.45871	0.66057	0.629679	-0.305467	-0.551061	-0.0902348	-0.219265	0.0575152	-0.0390813	6
COMMD8	1.47905	1.36989	0.41505	0.495115	-0.357617	-0.427983	-0.0844148	-0.0943817	-0.171401	-0.315942	17
COMMD9	2.03094	2.02228	0.469808	0.374259	-0.415016	-0.398508	-0.0557284	-0.0905986	-0.035389	-0.239961	26
COMT	-0.416291	-0.418585	-0.882888	-0.888953	0.0700612	0.0755701	0.329006	0.433907	0.0859176	0.0692163	79
COMTD1	-0.286434	-0.639271	-0.896347	-0.703609	0.257023	0.38129	0.920307	0.934548	-0.0380245	0.0542831	25
COP1	-1.06963	-1.17374	0.511121	0.403085	0.0525423	0.0940423	-0.49209	-0.500963	0.303872	0.344567	13
COPA	0.354419	0.261707	-0.238612	-0.284531	-0.470387	-0.441527	0.039902	0.163765	0.264999	0.389342	264
COPB1	0.541195	0.444918	-0.0815607	-0.120471	-0.657166	-0.675079	-0.0373128	0.00734031	0.0323962	0.111332	272
COPB2	0.492584	0.376376	0.236404	0.295133	-0.558621	-0.555976	-0.174506	-0.0887962	0.0197283	0.0915883	224
COPE	0.382502	0.318123	-0.254148	-0.235909	-0.568284	-0.56962	-0.0303808	0.132627	0.303938	0.382395	106
COPG1	0.428165	0.341165	-0.0566098	-0.114284	-0.630526	-0.660219	-0.0258944	0.0505306	-0.012634	0.113098	168
COPG2	0.215086	0.15261	-0.0259635	-0.149166	-0.585444	-0.582195	0.0964373	0.194461	0.144034	0.336577	81
COPRS	0.691194	0.718105	1.73677	1.79626	-0.259474	0.0129105	-0.347139	-0.513085	0.0800644	-0.107222	5
COPS2	0.714259	0.601641	0.977373	1.06792	-0.365758	-0.318286	-0.411644	-0.323498	0.0265397	0.0631244	115
COPS3	0.665084	0.541799	0.701469	0.739114	-0.498268	-0.522268	-0.397713	-0.284729	0.0642538	0.0422708	77
COPS4	0.793131	0.705744	0.929838	0.944259	-0.277313	-0.3091	-0.378213	-0.343501	0.0434685	0.0563115	90
COPS5	0.832157	0.618263	0.806377	0.916805	-0.615128	-0.619948	-0.702233	-0.614981	0.0222907	0.0611763	57
COPS6	0.505462	0.373856	0.548304	0.537167	-0.35838	-0.37428	-0.211752	-0.130941	0.056414	0.102492	46
COPS7A	0.427713	0.351793	0.703402	0.79755	-0.448747	-0.491928	-0.411401	-0.211161	0.0368073	0.100607	33
COPS7B	0.910944	0.719413	0.869997	0.757089	-0.620655	-0.667684	-0.516028	-0.47473	0.117983	0.0421903	19
COPS8	0.680928	0.41143	0.690432	0.60142	-0.301097	-0.424212	-0.454769	-0.289471	0.0391169	0.0318299	22
COPS9	0.337091	0.354679	-0.177959	-0.232634	0.0221079	0.00929556	0.187094	-0.271122	1.1598	0.953727	5
COPZ1	0.807541	0.78291	0.395443	0.406309	-0.528479	-0.550743	-0.0953573	-0.00627528	-0.0961494	0.0134653	66
COPZ2	1.85757	1.82331	0.465564	0.413933	-0.289784	-0.354889	-0.067129	-0.0708464	-0.123415	-0.203347	9
COQ10A	-0.549317	-0.225986	0.826987	0.376549	0.816975	-0.391331	0.933752	1.02976	-0.501819	-0.918134	1
COQ10B	-0.684941	-0.839425	-0.302958	-0.198375	0.269598	0.242081	0.419134	0.431552	-0.0140718	-0.0471798	3
COQ2	-2.74614	-1.85526	-2.37388	-2.45396	0.773906	0.719229	1.46093	1.53084	-0.0167903	0.104135	5
COQ3	-1.56731	-1.43388	-0.543398	-0.69168	0.127984	0.119436	0.258205	0.261318	0.00188949	0.166031	15
COQ4	-0.324779	-0.298912	-0.679223	-0.726348	0.110056	0.0365289	0.35768	0.441719	-0.0232192	0.110564	3
COQ5	-0.741974	-1.00955	-0.601901	-0.610881	0.232142	0.120032	0.399157	0.355034	0.0352084	0.154423	22
COQ6	-1.03569	-0.878178	-0.953178	-0.622933	0.252548	0.137968	0.49308	0.324879	0.0384637	0.0728946	11
COQ7	-1.39032	-1.2441	-1.13332	-0.919798	0.101318	0.0775022	0.440414	0.496809	0.11541	0.299407	14
COQ8A	-0.715089	-0.557495	-0.369353	-0.296397	0.349937	0.507245	0.802859	0.813866	-0.146523	0.0395429	20
COQ8B	-0.37938	-0.110445	-0.604036	-0.747308	0.326438	0.402445	0.85509	0.814279	-0.0571645	0.0621088	39
COQ9	-0.895582	-0.67817	-0.179281	-0.0680866	0.354819	0.229647	0.455588	0.441995	-0.555219	-0.292954	24
CORO1A	0.551555	0.302	-0.177528	0.247333	-0.612622	0.330215	-0.111768	-0.0467283	0.312046	-0.711278	19
CORO1B	0.908087	0.887941	1.30626	1.32654	-0.172108	-0.0892571	-0.0433676	-0.041041	-0.4508	-0.351756	51
CORO1C	-0.752349	-0.663441	0.0484302	0.1617	0.0728182	0.0236652	-0.0450338	0.0835104	0.0437116	0.160367	82
CORO2A	-0.870168	-0.839151	-0.424634	-0.349318	0.0561683	0.0141265	0.241268	0.27517	0.234598	0.282413	25
CORO2B	0.290229	0.279943	-0.36675	-0.0425038	-0.15665	-0.190543	-0.0458297	-0.0056768	0.0283625	0.26187	3
COTL1	3.2483	3.22093	1.39352	1.20586	-0.295141	-0.158324	-0.140387	-0.167875	-0.405572	-0.262836	36
COX10	-0.986079	-0.91801	-0.842928	-1.01746	0.679174	0.619792	1.01034	1.08268	0.0256329	0.0617122	7
COX11	-0.780968	-0.719951	-0.400309	-0.426687	0.919616	0.789257	1.25076	1.38026	-0.0790278	0.0736093	10
COX15	-0.691503	-0.909877	-1.19096	-1.30854	0.570207	0.56709	1.11761	1.08094	-0.0186093	0.105954	13
COX17	-0.71308	-0.762031	-0.11281	-0.412465	0.871061	0.980905	0.527139	0.627081	-0.837632	-0.176519	8
COX18	-1.58663	-0.979669	-1.44211	-1.43512	0.339493	0.465323	0.883827	1.01174	-0.0118622	0.0992073	7
COX19	-0.777823	-0.62116	-0.235877	-0.0652614	0.231964	0.316983	0.285507	0.364591	-0.789967	-0.871354	11
COX20	-0.363898	-0.725431	-0.957517	-0.791614	0.473034	0.503319	0.998312	1.06478	0.0125668	0.0397658	17
COX4I1	-0.454239	-0.463589	-0.627623	-0.64043	0.395927	0.412331	0.720115	0.758988	-0.0300389	-0.0215288	102
COX5A	-0.664454	-0.630849	-1.10259	-1.05446	0.644275	0.624201	1.01858	0.841363	0.015142	0.0444384	69
COX5B	-0.347413	-0.444681	-0.717501	-0.778639	0.542727	0.546804	1.02337	0.932995	-0.0660689	0.0571253	37
COX6A1	0.0333866	0.228211	-0.706573	-0.780361	0.361747	0.32292	0.811122	0.213444	-0.0512737	-0.130054	3
COX6B1	-0.849048	-0.75565	-0.354112	-0.292657	0.329469	0.539451	0.774291	0.400456	0.0184979	-0.116081	12
COX6C	-1.3971	-1.31081	-1.12612	-1.22025	0.671218	0.671336	1.01968	1.02091	0.0271482	0.047	31
COX7A2	-1.21333	-1.36053	-1.65586	-1.43358	0.516398	0.490188	1.04835	0.950599	-0.0227691	0.033676	23
COX7A2L	-0.778383	-0.852176	-1.58055	-1.18627	0.36704	0.362566	0.925219	0.457441	0.162438	-0.120955	16
COX7B	-1.49515	-1.12592	-1.325	-1.39769	0.745528	0.775792	1.31802	1.3566	0.036382	0.0509631	6
COX7C	-2.42207	-2.5353	-3.17718	-3.04382	0.330896	0.12483	0.970203	0.749899	0.201408	0.0406288	3
CP	1.57187	1.32306	0.231538	0.223837	-0.0827346	-0.680919	-0.510829	-0.433155	0.151205	-0.178347	1
CPA4	-0.447967	-0.344295	0.713677	0.900984	-0.0295548	-0.0176954	0.136611	0.139323	-0.116762	-0.289293	8
CPD	-0.778851	-0.756228	-1.01227	-0.9809	0.0330961	0.0606927	0.675434	0.79094	0.69214	0.716379	96
CPE	-0.123274	-0.170649	0.250476	0.369799	0.0437263	-0.0145729	0.0598535	0.0260147	-0.000902159	-0.109807	6
CPEB2	0.3894	0.693097	0.779856	1.0818	-0.168337	-0.303456	-0.0991262	-0.272307	-0.0667433	-0.0406818	6
CPEB4	-0.0528968	0.00739628	0.620791	0.498778	-0.294541	-0.29915	-0.159192	-0.0303904	0.369053	0.154713	9
CPM	-0.209576	0.0615249	-1.03019	-0.966536	-0.0280909	0.0129367	0.743813	0.881658	0.864269	0.942124	38
CPNE1	2.07209	2.14028	1.08709	0.992056	-0.2219	-0.219887	-0.203558	-0.0568889	-0.349077	-0.296853	52
CPNE2	0.452324	0.47377	0.66791	0.388219	-0.71314	-0.666699	-0.250286	-0.104167	0.108529	0.0973048	13
CPNE3	1.89286	1.68058	0.65258	0.31506	-0.344581	-0.301471	-0.0775954	-0.0651748	-0.055721	-0.102597	35
CPNE7	1.545	1.5842	0.950417	0.838697	-0.362754	-0.646112	-0.00431565	-0.0998833	0.109092	0.115745	2
CPNE8	0.830312	0.874517	0.445433	0.442416	-0.651877	-0.675224	-0.245996	-0.12487	0.0767972	0.0543351	34
CPOX	-0.977149	-1.03294	0.80823	0.840024	0.297749	0.327515	-0.0590659	-0.00407204	-1.1033	-1.02953	46
CPPED1	2.81275	2.7607	1.53235	1.42296	-0.131786	-0.171815	-0.136164	-0.10064	-0.181329	-0.188669	22
CPQ	-0.129523	-0.22256	0.515893	0.800416	-0.194654	-0.167919	0.263251	0.467344	-0.00121284	0.131255	7
CPS1	-1.04847	-1.02785	0.196419	0.403739	0.107834	0.083546	0.145607	0.0881659	-1.19776	-1.04477	1289
CPSF1	-0.382574	-0.388828	-0.150705	-0.157346	1.09929	1.16469	0.0521216	-0.0779304	-0.108503	-0.187402	99
CPSF2	-0.453197	-0.433227	-0.0011198	0.0133947	0.907323	0.948725	0.0244124	-0.112686	-0.201211	-0.224203	103
CPSF3	-0.124928	0.00501962	0.190348	0.128483	0.566861	0.626952	-0.0311357	-0.153075	-0.276417	-0.301207	71
CPSF4	-0.527552	-0.446641	-0.239409	-0.219724	1.02541	1.08254	0.0311399	-0.0645609	-0.0385605	-0.00897016	16
CPSF6	0.232264	0.19578	1.72932	1.81509	0.214768	0.32593	-0.189071	-0.194773	-0.456481	-0.36639	57
CPSF7	-0.49532	-0.440529	1.75947	1.83192	0.489535	0.524866	-0.183314	-0.151898	-0.380239	-0.377238	51
CPT1A	-0.612318	-0.678201	-1.03831	-1.04815	0.352595	0.401193	0.863079	0.986991	-0.0462801	0.0750017	129
CPT2	-0.969804	-0.881761	-0.244267	-0.210966	0.478392	0.370042	0.556623	0.589859	-0.167876	-0.000655598	90
CPTP	1.21607	0.959797	0.677318	0.621394	-0.509622	-0.901883	-0.100073	-0.373512	0.0737232	-0.330153	1
CPVL	-0.677727	-0.436746	0.109971	0.289872	-0.37846	-0.386973	0.318438	0.494674	0.114444	-0.0248645	9
CRABP2	2.79503	2.3829	0.44205	0.342485	-0.402353	-0.328322	-0.107579	-0.131092	-0.411585	-0.447623	11
CRACR2B	-0.123687	-0.175383	-0.450945	-0.242069	0.643006	0.713708	0.334283	0.481332	-0.371397	-0.0202893	2
CRADD	2.28369	2.06643	0.835938	0.899078	-0.0489127	-0.0575384	-0.0885648	-0.276096	-0.779256	-0.486455	6
CRAMP1	-0.525172	-0.584835	-0.212054	-0.066892	0.309856	0.496349	-0.491065	-0.394813	0.954914	0.624522	8
CRAT	-1.62254	-1.62738	0.0671689	0.257564	0.113253	0.095725	0.10745	0.0148429	-1.30888	-1.16164	37
CRB1	-0.988394	-0.804405	0.5996	0.675372	-0.320292	-0.0279442	0.262682	-0.197568	0.14927	0.213919	1
CRBN	1.65851	1.63048	0.943673	1.12423	-0.318433	-0.327101	-0.11252	-0.102722	-0.225349	-0.232636	20
CRCP	0.395868	0.223657	-0.13923	0.12136	-0.825114	-0.962406	-1.60467	-0.829742	0.306406	0.302846	1
CREB1	0.122886	0.133243	0.229799	0.267662	0.464934	0.464032	-0.0543064	-0.100211	-0.479283	-0.261378	10
CREB3	-0.465139	-0.605305	-0.661984	-0.804271	0.103548	0.163422	0.379468	0.577245	0.0769774	0.0953272	4
CREB3L2	-0.707296	-0.649533	-0.48994	-0.680937	0.05893	0.165614	0.365064	0.316287	-0.132603	0.0427024	7
CREB3L4	-0.421339	0.007438	-0.254886	0.240978	0.0854103	0.00591685	0.37533	0.392665	0.13631	-0.115237	1
CREB5	-1.34031	-1.41873	-0.367055	-0.288826	0.992256	1.16514	0.0834712	0.0136002	0.0252251	0.0116866	4
CREBBP	-0.170415	0.0665666	1.98985	2.11805	0.288272	0.379592	-0.152689	-0.103835	-0.492795	-0.447552	45
CREBZF	-0.42023	-0.127819	0.359246	0.428906	0.0922288	0.12153	-0.0655866	-0.038675	0.13053	0.137108	6
CREG1	-2.01213	-1.49508	0.469356	0.901301	0.0419431	0.0140403	0.358764	0.381492	0.0265275	-0.118852	1
CRELD1	-1.37904	-1.47617	-1.90985	-1.52966	0.0405525	0.122611	0.664845	0.710852	0.214924	0.188272	13
CRELD2	-0.871751	-0.779734	1.08103	1.3727	0.0960919	0.0366133	0.339251	0.31909	-0.632691	-0.64438	24
CREM	-0.143957	-0.216216	-0.0909137	-0.0122698	0.477266	0.471597	-0.121189	-0.141888	-0.098029	-0.0361066	7
CRIM1	-1.449	-1.14763	-0.840013	-0.873178	0.0530502	0.0436535	0.949843	1.07461	0.724516	0.892981	35
CRIP2	1.71003	1.52366	1.62303	1.48423	-0.186489	-0.259937	-0.207171	-0.0681822	-0.422602	-0.508678	46
CRIPT	1.73339	0.959667	2.18923	1.77603	0.173511	-0.207763	-0.839426	-0.374526	-0.105041	-0.613343	3
CRISPLD1	-0.313945	-0.677124	-0.527077	-0.186925	0.116684	0.0278865	0.540843	0.542051	0.965877	0.78899	3
CRISPLD2	0.308308	-0.0350028	-0.192588	-0.2813	-0.304928	-0.215971	0.749668	0.608176	0.974052	1.07456	2
CRK	2.7455	2.50755	1.92412	1.81613	0.0138019	-0.106199	-0.15781	-0.226918	-0.377816	-0.28104	34
CRKL	2.22875	2.01582	1.43662	1.21199	-0.128406	-0.139491	-0.174558	-0.158355	-0.364799	-0.297318	30
CRLF1	-0.390833	-0.349096	-0.208579	-0.121688	-0.0320858	-0.0110433	0.39488	0.43526	0.19619	0.252487	29
CRLF3	2.28452	2.07932	1.13063	1.12494	-0.0643782	-0.192041	-0.0758257	-0.0522688	-0.653575	-0.40555	26
CRLS1	-1.17896	-0.981912	-0.76755	-0.877935	0.151074	0.0579171	0.724465	0.501382	0.15625	0.129858	2
CRMP1	2.63259	2.53047	0.939868	0.897184	-0.0973454	-0.274755	-0.097097	-0.173121	-0.411802	-0.32252	28
CRNKL1	-0.956841	-0.893479	-0.100997	-0.336109	1.00768	1.18116	0.0279128	-0.0474029	0.0126499	-0.0027708	62
CROCC	0.436638	0.407852	-0.0673967	-0.135093	0.0394266	0.0210994	0.0612582	0.125038	-0.606482	-0.452218	56
CROT	0.0521578	0.038256	0.0440736	0.358293	-0.0768114	-0.115172	0.0937577	0.262156	-0.019459	-0.0989031	22
CRTAP	-0.930354	-0.917052	-0.164676	0.0325351	0.123851	0.0825819	0.387701	0.36014	-0.0787385	-0.0507797	80
CRTC1	2.26075	1.77049	0.997637	1.01037	-0.433654	-0.388748	-0.125111	-0.019446	-0.390489	-0.312076	7
CRTC2	0.215116	0.140872	1.48529	1.56601	0.177791	0.0852145	-0.104609	-0.0310444	-0.474147	-0.499263	9
CRTC3	0.361088	0.333479	1.36306	1.23971	-0.0215334	-0.183691	-0.0501196	0.0825588	-0.443151	-0.733267	16
CRY1	-0.24117	-0.310673	0.969049	1.0375	-0.167497	0.0223391	-0.0388578	0.163293	-0.0280404	-0.0515803	14
CRY2	-0.277724	-0.239526	1.23503	1.16941	-0.0205471	0.0583877	-0.107356	-0.049074	0.264291	0.355002	5
CRYAB	1.95222	1.79188	0.503234	0.567795	-0.233705	-0.22689	-0.115422	-0.0719805	-0.229955	-0.186489	24
CRYBG1	1.67271	1.74796	1.82834	1.76351	0.013031	-0.0377663	-0.323117	-0.0969393	-0.339125	0.099573	1
CRYBG3	1.34282	1.26814	0.257683	0.150894	-0.400618	-0.494883	-0.0367721	-0.0743847	-0.23502	-0.316385	48
CRYL1	1.96941	1.88142	0.931401	0.877996	0.0105599	0.136025	-0.537835	-0.469684	-0.930425	-0.728682	1
CRYZ	0.61103	0.289004	0.328019	0.393496	0.0319298	-0.0209105	-0.0243687	-0.049743	-1.07559	-0.840277	44
CRYZL1	2.5062	2.56245	1.75629	1.67443	-0.110444	-0.0266261	-0.121726	-0.221885	-0.223348	-0.27493	16
CS	-0.448393	-0.480594	0.165107	0.410108	0.122747	0.10363	0.0662425	0.0452495	-0.959071	-0.908618	112
CSDC2	1.68698	1.63556	0.521015	0.486008	0.0833949	-0.0663067	-0.336289	-0.0950268	-0.0149244	-1.57979	1
CSDE1	1.43078	1.39886	0.919063	0.91285	-0.423354	-0.429307	-0.532325	-0.523936	0.0945493	-0.0642773	219
CSE1L	1.46965	1.40489	0.138583	-0.0598532	-0.500426	-0.54962	-0.0373977	-0.0227222	-0.105997	-0.148763	315
CSF1	-0.365138	-0.281383	-0.243687	-0.165989	-0.0845826	-0.0340499	0.78712	0.699168	0.357136	0.54362	13
CSF2RA	-1.3138	-1.08902	-1.63678	-1.80167	0.0661232	0.0804613	0.59717	0.881733	0.870484	0.901188	5
CSGALNACT1	-1.44932	-1.47351	-2.08519	-2.23036	0.0734093	0.104519	0.876375	0.997306	0.44851	0.450587	6
CSGALNACT2	-0.507372	-0.286515	-0.906512	-0.706064	0.0434962	-0.028053	0.876533	0.902783	0.29908	0.419309	16
CSK	1.9759	1.81536	0.38672	0.418326	-0.0842076	-0.244015	-0.103433	-0.0195861	-0.152336	-0.133563	28
CSNK1A1	0.519643	0.252523	0.24045	0.395534	-0.146446	-0.2098	-0.0958034	-0.11057	0.0788115	0.0211631	16
CSNK1D	0.311978	0.26468	0.347424	0.363821	-0.241494	-0.334019	-0.220325	-0.154598	0.0920309	0.151028	6
CSNK1G1	-1.214	-1.22028	-1.24426	-1.15147	0.0461238	0.0252203	0.984495	1.02316	1.21015	1.1184	10
CSNK1G2	0.187113	0.305047	-0.269212	-0.390949	-0.0210607	-0.156614	0.47684	0.66069	0.904797	0.847771	3
CSNK1G3	-0.323557	-0.618976	-0.856344	-0.932619	0.0411706	0.0536492	0.845365	1.1188	1.14768	1.28708	12
CSNK2A1	0.628831	0.407221	1.30362	1.27526	0.0810504	0.148824	-0.606678	-0.377192	-0.667698	-0.603932	11
CSNK2A2	0.743942	0.623175	1.33639	1.45911	0.0472495	0.0687136	-0.371786	-0.371931	-0.499526	-0.449137	50
CSPG4	-0.249123	-0.207776	-0.621009	-0.590341	0.00926283	-0.0351305	0.368374	0.524312	0.492656	0.564076	75
CSPG5	-0.20979	-0.324723	-0.257943	-0.477328	0.0758307	-0.174298	0.659512	0.785455	1.10296	1.16766	3
CSPP1	-0.204654	-0.399824	0.645473	0.635431	-0.193679	-0.16392	-0.0561781	0.0852118	0.126555	0.137353	11
CSRP1	2.97107	2.91337	1.54296	1.46456	-0.146555	-0.225713	-0.155409	-0.164148	-0.362386	-0.355456	126
CSRP2	0.368332	0.445233	1.99257	2.08962	0.0624847	0.118512	-0.234528	-0.0562543	-0.45071	-0.379762	30
CSRP3	3.3638	3.4437	1.89784	2.09007	-0.100517	-0.011605	-0.189917	-0.178082	-0.515081	-0.360092	10
CST3	-0.686902	-0.534968	0.554566	0.680173	0.00306557	-0.051817	0.0703241	0.169452	0.0444031	-0.0517852	7
CSTA	0.283903	-0.453457	0.338434	-1.39115	0.846617	0.00144289	-0.631696	0.145403	0.830165	0.114678	10
CSTB	2.57555	2.68403	0.168879	0.336627	-0.0770119	-0.0700796	-0.172449	-0.338445	-0.355427	-0.359284	26
CSTF1	0.259975	0.251467	0.201844	0.196597	0.565424	0.744366	-0.11959	-0.133919	-0.619317	-0.521773	48
CSTF2	-0.285542	-0.0772452	0.422193	0.398532	1.03089	1.03485	-0.0384937	-0.196399	-0.455598	-0.456527	28
CSTF2T	0.273139	0.250613	0.326053	0.408401	0.752288	0.844199	-0.132373	-0.291716	-0.660787	-0.782264	16
CSTF3	-0.716423	-0.742224	0.467288	0.373257	1.06535	1.15401	-0.0101474	-0.0950392	-0.395303	-0.456035	86
CT83	-1.63441	-1.39602	-2.54891	-1.75757	0.227215	0.110056	0.471338	0.472265	0.0424696	0.0554029	3
CTAGE5	-1.31259	-1.46678	-1.3519	-1.08358	0.0656477	0.118871	0.617076	0.722499	0.174853	0.288369	34
CTBP1	0.303397	0.358715	1.24732	1.19264	0.0255651	0.0332051	-0.0888461	-0.0676015	-0.371587	-0.294383	21
CTBP2	0.0140985	0.185622	1.51137	1.68026	0.200569	0.150214	-0.105943	-0.0638965	-0.389097	-0.412644	33
CTBS	-1.42453	-1.1718	0.580245	0.773349	-0.289358	-0.180716	0.443021	0.459085	0.0727863	0.000353963	9
CTC1	0.0205827	-0.259646	0.708132	0.746287	0.0150548	-0.0589481	-0.0961625	0.0615052	0.210913	0.323691	6
CTCF	-0.587197	-0.625323	-0.749169	-0.852411	0.976588	0.952298	-0.00348558	-0.159432	0.964827	0.679389	35
CTDNEP1	0.263031	0.444452	-0.0254864	0.140407	0.00192561	0.15963	0.0659161	-0.0738238	0.0122667	-0.339965	6
CTDP1	0.0675824	0.0573974	1.85402	1.73625	-0.00553605	0.0709574	0.037086	0.127028	-0.233152	-0.129543	53
CTDSP1	-0.676479	-0.718293	-0.977541	-0.927919	0.0610736	0.0592773	1.03913	1.05246	1.03693	1.10883	12
CTDSP2	-0.199925	-0.248784	-0.65231	-0.784615	0.0601339	0.0864506	0.782115	0.744523	0.77777	0.98483	2
CTDSPL	-0.3615	-0.45604	-0.80818	-0.930664	0.0437944	0.0569781	0.775885	0.848654	0.364898	0.505558	6
CTDSPL2	-0.720552	-0.516072	-0.251254	-0.236595	2.0159	1.88931	0.80166	0.727798	-0.452425	-0.438245	45
CTGF	-0.814467	-0.583742	-0.134338	0.022571	-0.287489	-0.31444	0.211692	0.13686	0.0726726	0.252339	15
CTH	2.29981	2.22574	1.12628	1.13397	-0.273755	-0.217916	-0.272303	-0.312645	-0.0685526	-0.163323	16
CTHRC1	0.669917	0.875219	0.652469	0.182152	-0.58548	-0.393527	0.143972	0.348393	0.119576	-0.73622	2
CTIF	2.70739	2.6206	0.917084	0.804062	-0.334548	-0.227891	-0.101115	-0.0616235	-0.245904	-0.0795352	17
CTNNA1	0.299231	0.206077	-0.796379	-0.739843	-0.0225009	-0.0847643	0.536184	0.668615	0.115662	0.214713	206
CTNNA2	0.837858	1.0595	0.00571825	0.058579	-0.0820401	-0.253181	-0.127207	-0.047258	-0.106819	-0.278387	5
CTNNAL1	0.119643	-0.0862978	0.0785944	0.068574	-0.103462	-0.127453	0.249548	0.450558	-0.0156724	0.031857	26
CTNNB1	-0.563166	-0.413896	-0.768797	-0.717988	0.0932765	0.0187903	0.662334	0.743879	0.359893	0.443945	72
CTNNBIP1	2.0349	2.05389	0.37518	0.492126	0.0646695	-0.158719	-0.0657602	-0.13047	-0.549458	-0.330593	1
CTNNBL1	-1.05315	-0.964082	0.520447	0.503002	0.140565	0.198962	-0.0481409	0.0116967	-0.379633	-0.198985	96
CTNND1	-0.641899	-0.595769	-0.624174	-0.574809	0.0986437	0.0479408	0.630739	0.73903	0.179515	0.271005	166
CTPS1	2.60776	2.42186	0.310184	0.33564	-0.371513	-0.483453	-0.0491622	-0.0670186	-0.52624	-0.462556	68
CTPS2	2.15136	2.04259	0.525819	0.481161	-0.137774	-0.151278	-0.0733908	-0.0630809	-0.798566	-0.757474	38
CTR9	-0.374238	-0.372894	0.918288	1.04126	0.474581	0.518526	-0.119011	-0.107878	-0.252305	-0.077371	86
CTSA	-0.589019	-0.56933	-0.115937	-0.0895843	-0.278426	-0.347277	0.407548	0.553471	0.221406	0.128278	45
CTSB	-1.18252	-1.19844	0.611495	0.648748	-0.463522	-0.551714	0.41967	0.526976	0.154388	-0.0826441	22
CTSC	-0.331303	-0.422016	0.0451501	0.0633729	-0.156627	-0.175049	0.361376	0.348083	0.191817	0.0638615	38
CTSD	-2.52245	-1.97294	0.293507	0.515282	-0.139841	-0.763969	0.53475	0.496419	-0.123566	0.210911	1
CTSF	-0.950139	-0.862696	0.0509077	0.229223	-0.356443	-0.285679	0.261165	0.264177	0.0204467	0.0668984	6
CTSG	-0.0977085	0.449	0.654042	0.174334	0.984467	-0.384322	-0.327627	-0.308125	0.0377508	0.395156	6
CTSH	-1.66699	-1.4652	0.50726	0.655667	-0.477198	-0.487709	0.362583	0.487737	0.145446	0.0817868	7
CTSL	-0.0459318	-0.0400039	0.409335	0.603721	-0.0904244	-0.0417335	0.342897	0.269828	0.145	0.198536	14
CTSO	0.336616	0.455126	0.642538	0.770116	-0.397464	-0.425637	-0.0517449	0.201375	-0.11686	-0.45744	1
CTSS	0.2731	-0.144365	0.187745	0.0248742	-0.235668	0.586586	0.00268622	-0.0950179	1.88051	-0.288273	3
CTSV	-0.930648	-0.876211	0.236679	0.775614	-0.38359	-0.0913888	0.308268	0.311523	0.080071	0.0137368	3
CTSZ	-0.898699	-1.04445	-0.19048	-0.140363	-0.220134	-0.242832	0.470873	0.648518	0.262019	0.212625	33
CTTN	1.40241	1.24417	0.311008	0.43222	-0.376132	-0.380463	-0.0171821	-0.0599713	-0.223513	-0.225058	151
CTTNBP2NL	1.13041	1.08432	1.33095	1.2877	-0.146874	-0.147127	-0.129871	-0.0468941	-0.0814488	-0.159143	58
CTU1	2.47983	2.3144	0.0265137	0.0334432	-0.596804	-0.518795	0.0416067	-0.000397523	-0.351155	-0.316356	2
CTU2	1.66136	1.63571	0.467692	0.491179	-0.256654	-0.393442	-0.0299099	-0.0624217	-0.307916	-0.14721	7
CUEDC1	1.00898	0.990118	0.516644	0.597818	-0.444112	-0.25246	-0.0616663	-0.0443296	-0.441012	-0.341297	8
CUEDC2	2.2537	2.14177	1.56679	1.56429	-0.0164458	-0.205193	-0.0802804	-0.126108	-0.535928	-0.555529	21
CUL1	0.603181	0.507833	1.02651	1.029	-0.150376	-0.179768	-0.104229	-0.0272378	-0.0784334	-0.0229848	106
CUL2	0.593861	0.49538	0.847239	0.864255	-0.306524	-0.252747	-0.117432	-0.00531998	-0.0956597	-0.116615	111
CUL3	0.579545	0.480179	0.794665	0.798211	-0.422123	-0.400158	-0.0830513	-0.0380977	-0.0734271	-0.0306762	104
CUL4A	0.472319	0.376008	0.697934	0.716119	0.0481547	0.0773118	-0.412869	-0.325919	-0.0488342	-0.00466978	107
CUL4B	0.162377	0.0744637	0.6276	0.662784	-0.0838511	-0.064035	-0.0428995	-0.00896145	-0.0301717	0.0650969	119
CUL5	0.735926	0.679937	0.899658	0.942355	-0.388128	-0.386105	-0.126287	-0.0160215	-0.0956753	-0.129687	66
CUL7	1.36505	1.24977	0.00886534	0.0544592	-0.489026	-0.509062	-0.0589431	-0.0333885	-0.0458642	-0.0144039	17
CUL9	1.07077	0.899459	-0.169606	-0.0757673	-0.237327	-0.365799	-0.203491	-0.245181	0.119739	0.0428361	6
CUTA	2.38661	2.43116	1.32028	1.26218	0.0351247	-0.0106849	-0.141654	-0.322813	-0.599002	-0.75782	30
CUTC	0.154115	0.290557	1.61887	1.68262	-0.0150867	-0.112342	-0.246598	-0.105229	0.0354917	0.0192952	31
CUX1	-0.792241	-0.788535	-0.345392	-0.352678	0.351673	0.369031	0.368495	0.369706	-0.0657404	0.0148787	128
CWC15	-1.35971	-1.35083	1.31189	1.36695	1.09455	0.984997	0.0259473	-0.214614	-0.383479	-0.49527	13
CWC22	-1.07373	-0.960041	-0.175736	-0.384995	0.726572	0.899218	0.185423	0.0266517	-0.0273101	-0.0921434	63
CWC25	-0.98304	-1.05343	0.278334	0.302369	0.3764	0.54036	-0.0749069	-0.0648451	-0.0761656	-0.152606	15
CWC27	0.0229105	0.0736197	1.24522	1.30395	0.186066	0.301314	-0.109296	-0.113856	-0.303021	-0.228225	58
CWF19L1	0.0310255	0.200828	2.00955	2.07166	0.080485	0.107793	-0.0961049	-0.0470876	-0.207355	-0.231432	66
CWF19L2	-1.18799	-1.05527	0.720416	0.776847	0.0264899	0.173947	-0.177215	-0.140486	0.0621118	0.0722993	32
CXADR	-0.55934	-0.413278	-0.736636	-0.716191	0.060078	-0.0144058	0.672566	0.754628	0.664616	0.790929	24
CXCL16	0.129228	-0.310854	-0.203428	-0.52138	-0.105214	0.0868074	1.04381	0.543862	0.811478	0.703761	1
CXCR4	-0.995651	-1.42463	-1.39377	-1.6092	0.000809014	0.0878474	0.904582	1.0934	1.04331	1.377	11
CXXC1	-1.03133	-0.722278	0.881367	0.903584	0.466497	0.630124	-0.257613	-0.35203	0.00109205	-0.0561137	20
CXXC5	-0.824886	-0.932385	-0.489057	-0.227473	1.12257	0.931406	0.932175	0.883416	0.0970298	-0.458026	3
CXorf38	1.54132	1.65859	0.577626	0.396831	-0.281198	-0.321759	-0.0152746	-0.0304173	-0.176034	-0.239352	18
CXorf56	0.087599	0.290921	1.5149	1.48164	0.415288	0.306942	-0.182005	-0.330028	-0.456824	-0.397526	35
CYB561	-0.522931	-0.204816	-1.37903	-0.944932	0.0156339	0.130951	0.803903	1.07283	1.61257	1.47841	3
CYB561A3	0.455842	0.130595	-0.387897	-0.436535	-0.0761507	-0.0670091	0.27579	0.264063	0.396227	0.757496	1
CYB5A	-1.00842	-0.877334	-1.17477	-0.777476	0.0559739	0.113396	0.418696	0.408213	0.130842	0.270902	17
CYB5B	-0.56062	-0.646497	-1.35277	-1.06203	0.181091	0.145844	0.519068	0.621581	0.0299146	0.10171	39
CYB5D2	-1.13481	-1.07982	-0.91917	-1.08961	0.0910054	0.075018	0.424961	0.45377	-0.011769	0.138437	6
CYB5R1	-0.729221	-0.719797	-1.05239	-1.00534	0.452852	0.431121	0.934687	0.937716	-0.0442625	0.118316	61
CYB5R2	2.1591	2.00849	1.17609	1.01778	-0.196899	-0.300084	-0.28424	-0.252459	-0.447117	-0.151528	9
CYB5R3	-0.844541	-0.801019	-1.12432	-1.11043	0.154463	0.160032	0.577675	0.664721	0.0729583	0.0866245	165
CYB5R4	2.41657	2.18112	0.916734	0.857248	-0.00977007	-0.126935	-0.0331437	-0.0693442	-0.402704	-0.379856	13
[truncated: 8,017 more rows]

## Sheet: HiRIEF 3-10
Protein	FS1.A.set01_tmt10plex_126	FS1.B.set01_tmt10plex_127N	FS2.A.set01_tmt10plex_127C	FS2.B.set01_tmt10plex_128N	FP1.A.set01_tmt10plex_128C	FP1.B.set01_tmt10plex_129N	FP2.A.set01_tmt10plex_129C	FP2.B.set01_tmt10plex_130N	FP3.A.set01_tmt10plex_130C	FP3.B.set01_tmt10plex_131	Min PSMs for quant
A2M	0.0409866	0.0998196	0.335649	0.407392	-0.193059	-0.251938	0.112439	0.142942	-0.00483641	-0.0407234	61
A4GALT	-0.525645	-0.365817	-1.06794	-0.813695	0.416788	0.210055	0.79418	0.847598	0.592868	0.733982	3
AAAS	-0.471116	-0.695175	-0.968816	-0.690807	0.855006	0.770003	0.663377	0.631785	0.240339	0.493877	21
AACS	2.39388	2.1523	0.422152	0.326125	-0.593036	-0.56519	-0.69796	-0.746266	-0.779412	-1.00636	22
AADAT	0.100394	0.0173284	0.0296996	0.229568	-0.0346002	-0.000439767	0.0838776	-0.0273923	-0.657442	-0.488307	3
AAED1	0.367268	0.446557	-0.207174	-0.116882	-0.0767566	-0.247488	0.358446	0.525452	-0.182213	-0.16287	1
AAGAB	1.83087	1.66858	0.0100295	0.222942	-0.732289	-0.481895	-0.427646	-0.219411	-0.583047	-0.524915	3
AAK1	1.40356	1.42821	0.0856351	0.135062	-0.513377	-0.491607	-0.239352	-0.29829	-0.466187	-0.391986	22
AAMDC	2.33077	2.16992	-0.165108	0.225087	-0.508137	-0.670729	-0.546017	-0.499451	-0.713082	-0.764377	4
AAMP	1.59858	1.47819	0.61011	0.57938	-0.289221	-0.323022	-0.568207	-0.454287	-0.643686	-0.706565	13
AAR2	0.363912	0.273117	0.413452	0.350798	-0.364902	-0.267364	-0.533077	-0.252663	0.427878	0.432008	25
AARS	2.65743	2.48422	0.350321	0.310657	-0.657892	-0.750147	-0.70311	-0.623726	-1.00554	-0.87922	119
AARS2	-0.481994	-0.45701	-0.12343	0.0363636	0.517351	0.474431	0.55384	0.510493	-0.361423	-0.25817	34
AASDH	0.347624	0.230352	1.00746	0.908584	-0.373642	-0.505508	-0.160206	-0.124722	-0.068622	-0.556983	2
AASDHPPT	1.32742	1.09799	0.659023	0.485866	-0.605375	-0.531229	-0.329878	-0.317029	-0.607318	-0.494793	14
AASS	-0.7146	-0.533257	0.458956	0.662481	0.53667	0.50401	0.537986	0.399559	-0.544536	-0.442813	42
AATF	-0.421875	-0.339739	-0.593294	-0.727868	1.2122	1.13148	0.155392	0.0290795	0.118919	0.00972409	21
ABCA1	0.320187	0.0792897	-0.925794	-0.826277	0.268416	-0.0547318	0.618712	0.816275	0.194468	0.385227	3
ABCA2	-0.273597	-0.330617	-0.694814	-0.66207	0.0381992	0.119208	0.565308	0.730873	0.685941	0.697924	36
ABCA3	-1.32187	-0.410616	-0.951022	-1.13382	-0.0377506	0.11353	1.2774	1.43089	1.39491	1.6015	5
ABCA5	0.0202532	-0.520556	-0.331257	-0.507235	-0.0381653	-0.00202862	0.274614	0.265154	0.990154	0.553407	2
ABCA7	-0.188048	-0.049516	-0.901286	-0.674676	0.251669	0.16914	0.601328	0.66509	0.419507	0.660942	8
ABCB1	-0.58839	-0.507525	-0.898589	-0.679597	0.266596	0.23754	0.871966	0.950633	0.60428	0.69167	46
ABCB10	-0.658644	-0.639327	-1.1861	-1.09476	0.90533	0.721405	1.39825	1.13589	0.171136	0.292002	23
ABCB6	-0.290391	-0.272138	-0.772442	-0.761866	-0.122997	-0.074348	0.724514	0.826548	0.968778	0.880001	46
ABCB7	-0.428019	-0.563353	-0.835573	-0.824878	0.675293	0.634095	0.945816	1.02422	-0.0152656	0.203713	28
ABCB8	-0.443902	-0.342162	-0.594925	-0.630605	0.529942	0.503671	0.786981	0.864137	-0.0503548	0.018039	14
ABCC1	-0.567089	-0.519005	-1.05344	-1.07398	0.414003	0.374153	0.932334	0.973653	0.619851	0.700879	101
ABCC10	-0.175299	-0.0788169	-0.464028	-0.662549	-0.155686	-0.220325	0.551232	0.542621	0.432699	0.544196	4
ABCC3	-0.347373	-0.239879	-1.02888	-0.977985	0.282644	0.220959	0.889056	0.970458	0.642617	0.669721	35
ABCC4	-0.667107	-0.645014	-0.9203	-0.906498	0.36889	0.319288	0.932871	1.02467	0.516215	0.568798	46
ABCC5	-0.958691	-1.1323	-0.807799	-0.741215	0.559513	0.277806	0.890017	0.922757	0.532437	0.762496	11
ABCD1	-0.408944	-0.335003	-0.956832	-0.686851	0.290153	0.39509	0.724213	0.856993	0.548506	0.672328	37
ABCD3	-0.44604	-0.553679	-0.796129	-0.821177	0.377615	0.360312	0.742343	0.856102	0.59077	0.583163	56
ABCE1	1.49097	1.39795	0.172476	0.102862	-0.447041	-0.567605	-0.30221	-0.270171	-0.425667	-0.425444	77
ABCF1	1.07632	0.99049	0.264285	0.102985	-0.585359	-0.598638	-0.244379	-0.334845	0.141741	-0.0677096	70
ABCF2	0.375564	0.487412	0.605813	0.5174	-0.348466	-0.438494	-0.0537023	-0.196874	-0.0686675	-0.262808	60
ABCF3	2.0684	1.80246	0.0423776	-0.120931	-0.497366	-0.535322	-0.28296	-0.368865	-0.625805	-0.614186	29
ABCG1	-0.674617	-0.413818	-1.14922	-1.21463	0.378457	0.401659	0.829551	0.952071	0.651192	0.875189	10
ABHD10	-0.938875	-0.785771	0.358564	0.531806	0.79915	0.688102	0.690178	0.686475	-0.469995	-0.267973	23
ABHD11	-0.375643	-0.491607	-0.0411561	0.238554	0.534303	0.447282	0.483474	0.48321	-0.531047	-0.169437	11
ABHD12	-0.866078	-0.713288	-1.05379	-0.983232	0.774746	0.603908	0.809274	0.775578	0.621956	0.529394	13
ABHD13	-0.612507	-0.690563	-1.23382	-0.930413	0.170359	0.242815	0.91065	1.15539	0.641957	0.628425	5
ABHD14B	2.25949	2.06179	0.382141	0.283762	-0.650262	-0.670179	-0.711118	-0.833431	-0.627394	-0.733509	12
ABHD15	-0.188208	-0.083042	-0.737627	-0.734458	0.275164	0.17869	0.505283	0.548692	0.423222	0.473252	7
ABHD16A	-0.155736	0.0587802	-0.645584	-0.710803	0.35873	0.365372	0.528164	0.544815	0.157872	0.409985	26
ABHD17A	0.865406	0.630316	-0.0300949	0.0303635	-0.346467	-0.32214	-0.165667	-0.139025	0.171788	0.00986227	2
ABHD17B	-0.50466	-0.0975273	-1.02361	-0.953969	-0.0752003	-0.104213	0.682988	0.60329	0.924709	0.965657	7
ABHD17C	0.351463	0.103027	-0.389928	-0.182256	-0.320219	-0.368346	0.289059	0.560444	0.171547	0.489548	1
ABHD18	0.451039	0.608733	-0.119144	-0.138848	-0.00820478	0.147226	0.180049	0.480291	-0.489367	-0.358006	4
ABHD3	-0.380572	-1.30396	-1.86529	-1.58012	0.777797	0.890724	1.306	1.3657	0.625281	0.868774	1
ABHD4	0.901554	0.731465	0.0511851	0.135797	-0.219724	-0.0593403	-0.0629006	-0.136203	-0.387068	-0.250426	1
ABHD5	0.25555	0.493837	-0.0735065	-0.385828	0.0604483	-0.313754	0.194694	0.202328	-0.0244439	0.0570339	5
ABHD6	-0.409109	-0.639787	-0.913719	-0.416756	0.390115	0.452842	0.788795	0.843856	0.505671	0.504529	12
ABI1	0.832872	0.737077	-0.394583	-0.379355	-0.705378	-0.555622	-0.0999269	-0.00689957	0.780837	0.707699	14
ABI2	0.768483	0.490676	-0.368345	-0.22959	-0.530569	-0.598004	0.0954846	0.142914	0.459408	0.482135	6
ABL1	1.30429	0.993143	0.134144	0.130598	-0.483581	-0.502999	-0.0914569	-0.036235	-0.219909	-0.316099	21
ABL2	1.21505	1.19492	-0.1877	-0.192677	-0.136624	-0.38006	-0.149927	-0.128261	-0.530433	-0.537709	5
ABLIM1	-0.421842	-0.403125	-0.0587722	-0.0676243	0.88985	0.867841	0.478719	0.446804	-0.424063	-0.522106	45
ABLIM2	0.530877	0.500164	0.876685	0.929405	-0.0473364	-0.00672499	-0.1993	-0.0667014	-0.597478	-0.490334	4
ABR	1.62451	1.44686	0.150574	0.0367094	-0.524185	-0.585293	-0.175508	-0.246153	-0.285691	-0.404522	29
ABRACL	3.2318	3.31307	0.454579	0.467235	-0.903652	-0.99837	-0.879874	-1.44763	-1.01336	-1.51947	2
ABRAXAS1	-0.490169	-0.510199	0.060845	0.0023452	0.333814	0.308451	-0.367399	-0.271075	0.977801	0.880686	5
ABRAXAS2	2.02807	1.77373	0.527443	0.557168	-0.821123	-0.958231	-0.548667	-0.602898	-0.410955	-0.538003	21
ABT1	-0.173846	-0.214039	-0.383002	-0.261577	0.899514	1.00095	0.00231381	-0.206609	-0.000132075	-0.123389	9
ABTB1	1.36628	1.1	0.24585	-0.0878634	-0.594594	-0.566325	-0.0378509	-0.203062	-0.259685	-0.44034	5
ABTB2	1.35859	1.28997	-0.042859	-0.00781843	-0.435875	-0.487231	-0.309365	-0.376471	-0.277396	-0.351716	9
ACAA1	-0.466466	-0.695146	0.124842	0.390053	0.332231	0.31367	0.506426	0.455945	0.280331	0.301194	31
ACAA2	-0.373902	-0.584418	0.468049	0.58714	0.575303	0.550925	0.40628	0.380471	-0.734551	-0.655485	56
ACACA	1.6755	1.48141	-0.128624	-0.210925	-0.46646	-0.52827	-0.196332	-0.201293	-0.311566	-0.355961	155
ACAD10	-0.197552	-0.243191	-0.00223892	0.117563	0.377985	0.35098	0.51663	0.512668	-0.355286	-0.153294	22
ACAD11	-0.333809	-0.425365	-0.313435	-0.236635	0.31722	0.241227	0.465562	0.504429	0.461054	0.396879	14
ACAD8	-0.682635	-0.627421	0.412184	0.666126	0.67109	0.660567	0.541257	0.512867	-0.711036	-0.649028	17
ACAD9	-0.559513	-0.650211	-0.122041	0.0469547	0.628395	0.530537	0.72471	0.737774	-0.307977	-0.27672	62
ACADL	-0.490928	-0.324414	0.311296	0.562761	0.664466	0.799749	0.430465	0.371804	-0.745452	-0.532836	5
ACADM	-0.755385	-0.697603	0.644122	0.871911	0.655766	0.561624	0.607786	0.491369	-0.810198	-0.666034	43
ACADS	-0.16094	-0.423267	0.318365	0.587304	0.447707	0.316626	0.298667	0.3282	-0.670167	-0.508566	15
ACADSB	-0.742931	-0.541766	0.576688	0.69205	0.65229	0.610659	0.583314	0.544386	-0.565247	-0.490519	22
ACADVL	-0.551733	-0.582278	0.0180508	0.170532	0.721254	0.668238	0.712928	0.667276	-0.500173	-0.266579	136
ACAP2	2.04884	2.02708	-0.0059578	-0.183502	-0.760917	-0.587916	-0.277204	-0.364979	-0.517164	-0.427663	21
ACAP3	1.38495	1.33114	-0.252128	-0.352795	-0.375918	-0.615773	0.141229	0.0429295	-0.322313	-0.275075	4
ACAT1	-0.639862	-0.64283	0.398788	0.67748	0.685016	0.599133	0.537942	0.502553	-0.729482	-0.594273	66
ACAT2	1.71738	1.69186	0.814841	0.778915	-0.462574	-0.557873	-0.70949	-0.687602	-0.829055	-0.728463	31
ACBD3	0.220949	0.250252	0.559872	0.435504	-0.29355	-0.321715	0.147362	0.171497	-0.138406	-0.0639457	32
ACBD4	-1.3526	-1.31498	0.417726	0.393017	1.00219	1.10739	0.118823	-0.0152639	0.250527	0.0974976	2
ACBD5	-0.42443	-0.453145	-0.721227	-0.704459	0.284835	0.268537	0.716397	0.861256	0.431547	0.457545	22
ACBD6	1.30458	1.27939	0.317694	0.4669	-0.364565	-0.402996	-0.443122	-0.495346	-0.743876	-0.491093	8
ACD	0.118921	-0.0970664	0.599545	0.162689	0.830787	0.53909	0.0257167	-0.086696	-0.0714881	-0.676188	3
ACIN1	-0.703413	-0.567256	-0.208399	-0.101259	1.49585	1.48571	0.373399	0.322706	-0.459262	-0.323145	88
ACKR3	-1.572	-1.68837	-0.983201	-1.18188	0.527617	0.294591	0.816218	0.759073	0.8931	0.937993	3
ACLY	1.70475	1.56951	0.475912	0.512853	-0.609771	-0.603504	-0.637306	-0.584739	-0.465411	-0.427942	316
ACO1	1.76159	1.48732	0.775568	0.767598	-0.501311	-0.57703	-0.663091	-0.662008	-0.687266	-0.776772	62
ACO2	-0.400125	-0.410384	0.493919	0.677042	0.602185	0.543336	0.455676	0.405181	-0.831131	-0.73277	171
ACOT11	1.98136	2.02829	0.51182	0.44741	-0.802367	-0.696519	-0.462218	-0.552631	-0.971245	-0.77956	1
ACOT13	-1.49261	-1.53382	0.709102	1.0563	1.04644	0.953263	0.793444	0.783935	-1.14347	-1.01305	11
ACOT2	0.124726	0.0714797	0.384714	0.608865	0.45184	0.340494	0.298033	0.186012	-0.559988	-0.881155	3
ACOT4	0.0513451	-0.00938604	0.138355	0.133656	0.0499949	-0.0794531	0.361406	0.103045	0.0555885	0.0437456	3
ACOT7	1.53311	1.5048	1.0956	0.924756	-0.474979	-0.668986	-0.668237	-0.49354	-0.89241	-0.814076	28
ACOT8	0.0240596	-0.245082	-0.0709861	0.00363136	0.130499	0.004711	0.317115	0.270041	0.116879	0.190576	11
ACOT9	-0.622047	-0.677437	-0.0184986	0.180091	0.604404	0.629814	0.625528	0.629181	-0.375406	-0.205345	46
ACOX1	-0.312314	-0.234711	0.0651373	0.261015	0.18545	0.167068	0.354649	0.31386	0.26241	0.187308	41
ACOX3	-0.677791	-0.483389	-0.144097	0.0827311	0.245707	0.176378	0.447916	0.385425	0.571758	0.520798	28
ACP1	1.58073	1.48686	0.285287	0.316424	-0.222079	-0.144645	-0.479635	-0.343042	-0.797918	-0.518383	17
ACP2	-0.67703	-0.729275	-0.260248	-0.142706	-0.107132	-0.0971719	0.690786	0.70496	0.857696	0.820566	15
ACP6	-0.72321	-0.617079	1.13652	1.11895	0.590162	0.676346	0.177615	0.261759	-1.36181	-0.929252	6
ACSF2	-0.278682	-0.379134	0.277924	0.390049	0.464149	0.200983	0.372599	0.256997	-0.58915	-0.519667	7
ACSF3	-0.986899	-0.827971	0.206458	0.332607	0.755926	0.626693	0.687145	0.698443	-0.422254	-0.287571	12
ACSL1	-0.549368	-0.570235	-0.306442	-0.407497	0.1395	0.231953	0.667908	0.704402	0.393874	0.420406	31
ACSL3	-0.980247	-0.888674	-1.18739	-1.07006	0.617256	0.635815	0.948471	1.04218	0.674583	0.756865	78
ACSL4	-0.878538	-0.622843	-0.438223	-0.442795	0.26226	0.190034	0.736281	0.720007	0.50656	0.504313	62
ACSS1	1.25337	-0.427751	0.175644	0.574326	0.236077	0.028886	-0.574332	0.551154	-0.906798	-0.206237	2
ACSS2	1.71962	1.46983	1.20014	0.922739	-0.508251	-0.543133	-0.757003	-0.944227	-0.740989	-0.794412	9
ACTB	-0.381581	-0.189888	0.639199	1.21625	-0.264463	-0.0812457	-0.34149	0.566699	0.246961	0.83368	3
ACTBL2	0.31382	0.355745	0.114941	0.294042	-0.428784	-0.188732	-0.123682	-0.164345	-0.112449	-0.250651	5
ACTG1	-0.0658062	0.0533102	0.102289	0.535082	-0.0797456	-0.00523555	-0.101275	0.127361	-0.124243	0.168355	3
ACTL6A	-0.0211822	-0.180498	0.195516	0.18487	0.889701	0.802214	-0.294051	-0.516689	-0.0843106	-0.112367	40
ACTN1	0.308028	0.441275	0.605543	0.703018	-0.0148668	-0.00698247	-0.256316	-0.119732	-0.434996	-0.465232	200
ACTN2	0.0509143	-0.626836	-0.221213	-0.705484	0.940804	0.0366954	0.78666	0.258185	0.369056	-0.184441	1
ACTN4	0.168551	0.165142	0.768707	0.846152	0.125476	0.0864261	-0.202414	-0.127376	-0.609057	-0.544752	583
ACTR10	1.62733	1.42906	0.0401247	0.00587819	-0.690116	-0.681725	-0.527897	-0.410922	0.0195271	-0.0162013	11
ACTR1A	1.10144	1.09716	0.0390767	-0.0832017	-0.351926	-0.329999	-0.326694	-0.337208	0.0835345	-0.110437	22
ACTR1B	1.26194	1.24695	-0.031263	-0.0168507	-0.550386	-0.368028	-0.34205	-0.299061	0.0175855	-0.186283	11
ACTR2	1.3598	1.20681	0.0193262	0.120177	-0.472432	-0.327257	-0.283094	-0.187915	-0.281684	-0.222827	62
ACTR3	0.674264	0.632046	0.0910444	0.118504	-0.324974	-0.067667	-0.193125	-0.127532	-0.00227047	-0.221042	81
ACTR3B	0.19148	0.305308	0.0140773	0.0997221	-0.115467	0.0422376	-0.0674036	0.18364	0.0235402	0.0272055	2
ACTR5	-0.358719	-0.0471915	0.380798	0.59878	0.43045	0.487173	-0.312987	-0.386807	0.106151	-0.103188	15
ACTR6	0.0382356	0.310502	0.154486	0.075942	0.689371	0.531588	-0.186271	-0.155712	-0.377845	-0.340963	6
ACTR8	-0.512543	-0.283715	0.448943	0.54836	0.476642	0.355946	-0.188998	-0.211205	0.0923121	0.0563617	19
ACVR1	0.288518	0.290708	-0.810188	-0.574331	-0.0606745	-0.110398	0.421548	0.551822	0.437257	0.32905	5
ACYP1	2.11972	1.80975	0.393224	-0.0104548	-0.651033	-0.988198	-0.775037	-0.509283	-0.746682	-0.603053	6
ACYP2	2.33414	2.20848	0.113166	0.203479	-0.456187	-0.356833	-0.495664	-0.544648	-0.746408	-0.786359	6
ADA	1.85837	1.5758	1.37487	0.697732	-0.422219	-0.534258	-0.849253	-0.881136	-0.780183	-1.24756	20
ADAL	1.73812	2.07006	0.874523	0.8218	-0.667891	-0.540297	-0.750222	-0.680884	-0.917675	-0.839218	9
ADAM10	-0.625704	-0.421039	-0.862294	-0.75847	0.358261	0.241468	0.762614	0.701967	0.679886	0.658008	42
ADAM12	-0.956006	-0.385824	-0.931455	-0.644779	0.649226	0.682436	0.766454	0.89525	0.354344	0.403266	4
ADAM15	-0.293715	-0.344749	-0.549733	-0.743709	0.25643	0.209724	0.611967	0.558583	0.595087	0.498585	12
ADAM17	-0.644947	-0.50833	-0.89342	-0.866307	0.376425	0.302315	0.710472	0.829541	0.636356	0.695367	24
ADAM22	-0.021146	-0.0766653	-0.839366	-0.546131	0.0797863	0.14256	0.650387	0.780284	0.861436	0.771508	8
ADAM9	-1.04165	-1.20359	-1.26324	-1.11592	0.382941	0.440588	1.03694	1.17309	1.03884	1.12105	23
ADAMTS1	-0.548964	-0.714631	-0.479637	-0.42497	0.134069	-0.0619393	0.792888	0.525226	0.779631	0.669753	30
ADAR	-0.325783	-0.447234	-0.82415	-0.807358	1.13094	1.1681	0.315626	0.0870888	0.32288	0.256389	107
ADARB1	-0.446435	-0.456194	-0.780001	-0.749425	0.746245	0.863578	0.0699474	-0.0423763	0.703713	0.518923	16
ADAT1	0.235829	0.25814	1.12727	0.882153	-0.138152	-0.0592212	-0.223201	-0.220034	-0.420401	-0.362382	5
ADAT2	0.433606	0.442767	1.50455	1.36209	-0.207022	-0.168837	-0.615859	-0.689851	-0.566199	-0.790897	1
ADAT3	0.715677	1.17652	0.607216	0.772243	-0.40211	-0.323248	-0.149975	-0.0749491	-0.830356	-0.712063	3
ADCK1	0.00970391	-0.0581716	-0.676925	-0.541837	0.4576	0.332932	0.479739	0.612647	-0.146968	0.0130435	8
ADCK5	-0.688642	-0.786358	-1.32299	-1.31679	0.785725	0.833262	1.50061	1.35933	-0.0533552	0.393542	2
ADCY3	-0.279821	-0.59057	-1.47432	-1.21183	0.384356	0.399467	1.04473	1.04443	0.714958	0.641781	14
ADCY4	0.383699	0.41546	0.133408	0.184451	-0.663998	-0.804435	-0.392044	-0.34673	0.981663	0.812867	1
ADCY5	1.7883	1.722	1.51225	1.48399	0.355104	-0.145932	-1.10756	-1.61318	-1.60131	-1.68933	2
ADCY6	0.0270713	-0.111477	-0.510555	-0.424983	0.0136298	0.0967101	0.146035	0.279727	0.305693	0.402809	13
ADCY7	-0.318615	-0.377376	-0.637633	-0.605256	0.237929	0.153957	0.72515	0.926099	0.548684	0.528664	9
ADCY9	-0.452757	-0.51237	-1.26069	-1.29477	0.40273	0.292407	0.933135	1.04095	0.733523	0.845632	27
ADD1	0.193785	0.137889	0.428618	0.521173	0.100707	0.155297	-0.179723	-0.106401	-0.31611	-0.307436	41
ADD3	0.00338277	-0.074193	0.40436	0.376818	0.215095	0.293961	-0.0849735	-0.0382369	-0.0895453	-0.199802	51
ADGRA3	-0.503253	-0.335797	-0.540357	-0.612704	0.220298	0.17804	0.410803	0.700623	0.283357	0.502018	8
ADGRB1	0.0425293	-0.0107518	0.0897479	0.173516	-0.0486212	-0.00111609	0.0483859	0.0627489	0.128727	0.219174	1
ADGRD1	0.0158637	-0.019232	-0.0962066	0.258401	0.254658	0.369538	0.203574	0.0658896	-0.0402467	-0.307899	1
ADGRE2	-0.977449	-0.574424	-0.803985	-0.776481	0.288119	0.530205	0.848178	0.832118	0.520266	0.47889	4
ADGRE5	-0.368964	-0.292861	-0.696582	-0.55605	0.0361209	0.154168	0.602176	0.7354	0.625783	0.681534	58
ADGRF1	1.18942	1.28607	0.0120753	0.191274	-0.914854	-0.78726	-0.44593	-0.384252	0.264549	0.293243	1
ADGRG1	-0.445116	-0.289625	-0.496074	-0.340809	0.0867305	-0.0140395	0.401711	0.588046	0.459995	0.485753	14
ADGRG2	-0.361616	-0.195805	-0.417818	-0.27996	0.120385	-0.0243697	0.649667	0.613653	0.549768	0.367968	7
ADGRG6	-0.124506	-0.472701	-0.799861	-0.848408	0.0587079	-0.0463459	0.769646	0.809538	0.606485	0.623997	5
ADGRL2	0.144317	0.123267	-0.973327	-0.714776	-0.0193221	-0.0673961	0.5517	0.643229	0.541606	0.446666	22
ADH5	1.72596	1.41516	0.773856	0.670729	-0.524024	-0.458003	-0.567122	-0.615988	-0.833131	-0.727981	60
ADI1	2.05732	1.83374	0.626993	0.5351	-0.334224	-0.707137	-0.573969	-0.767983	-0.919406	-0.960651	4
ADIPOR1	-0.0523665	-0.254513	-1.12509	-1.08226	-0.00394749	-0.0246606	0.828001	0.809597	0.591654	0.68559	4
ADIPOR2	-0.462127	-0.34563	-1.42728	-1.57302	0.708665	0.667696	1.14753	1.07875	0.543936	0.554333	3
ADIRF	1.4218	1.69261	-1.11023	-1.28077	-0.933449	-0.367685	0.240787	0.648298	0.125303	0.267671	1
ADK	1.52128	1.55028	1.44161	1.20041	-0.576134	-0.618564	-0.896707	-0.793979	-1.01268	-0.978538	47
ADNP	-0.875534	-0.757718	0.502687	0.484457	1.00015	1.11122	-0.094518	-0.143787	-0.212888	-0.19528	65
ADNP2	-0.460954	-0.479124	-0.0853164	0.0661724	1.21289	1.06539	0.0820993	-0.064885	-0.281555	-0.214206	7
ADO	1.06668	0.769365	0.763685	0.82106	-0.141211	-0.188134	-0.277292	-0.368347	-0.737308	-0.819999	9
ADPGK	-0.24583	-0.232291	-0.7459	-0.898463	0.444044	0.407976	0.558632	0.722579	0.262531	0.357419	18
ADPRHL2	0.839427	0.614688	0.579369	0.641841	-0.108838	-0.1347	-0.222126	-0.110608	-0.849054	-0.668763	23
ADRA2A	-0.00208875	-0.250008	-0.241416	-0.00725669	0.327627	-0.0322886	0.190663	0.488262	0.132838	0.525008	6
ADRM1	0.868276	0.928225	0.128905	-0.0727047	-0.525702	-0.458006	-0.645474	-0.666386	0.811767	0.804849	20
ADSL	1.97696	1.77387	0.647525	0.681057	-0.639593	-0.773199	-0.72522	-0.683997	-0.800874	-0.772219	38
ADSS	1.76787	1.68703	0.780564	0.80874	-0.668479	-0.632274	-0.730264	-0.647834	-0.945795	-0.75972	43
ADSSL1	0.791877	0.641024	1.51986	1.10553	-0.292001	-0.427265	-0.651206	-0.607928	-0.821497	-0.747687	16
AEBP2	-0.409083	-0.298085	0.896278	0.717567	-0.00411132	0.111881	-0.115573	0.024123	0.22262	0.0957361	7
AES	0.256851	0.313492	0.387715	0.49636	-0.221309	-0.155958	-0.0482929	-0.0505252	-0.150218	0.0251812	6
AFAP1	-1.35176	-1.1825	0.417265	0.39732	0.312819	0.374119	0.496724	0.596243	0.26107	0.269243	15
AFDN	0.0585461	0.0839899	-0.030071	-0.101373	-0.123485	-0.213685	0.188904	0.20968	0.273774	0.218339	36
AFF1	-0.678583	-0.744585	0.573442	0.56526	0.30658	0.363243	-0.0498351	0.0420972	0.145554	0.171405	23
AFF4	-0.995984	-0.940867	0.784351	0.819545	0.445876	0.507688	-0.13613	-0.112181	0.150368	0.127077	27
AFG1L	-0.6829	-0.718506	-0.327172	-0.189103	0.878262	0.756849	0.788824	0.752632	-0.225664	-0.110414	12
AFG3L2	-0.97476	-0.859027	-1.26612	-1.10928	0.878485	0.7649	1.27839	1.36561	0.209728	0.389302	68
AFP	3.14271	3.1037	0.0728841	0.197432	-0.605181	-0.361293	-1.09798	-0.919687	-1.34197	-0.780346	6
AFTPH	0.829732	0.682066	0.602601	0.394377	-0.41749	-0.641093	-0.264295	-0.405269	-0.00983797	-0.13898	11
AGA	-0.782425	-0.987764	0.563304	0.566938	0.11102	-0.0583427	0.454655	0.440823	0.114215	0.179981	9
AGAP1	0.558816	0.558816	0.676594	0.761315	-0.705752	-0.527931	-0.361191	-0.263936	-0.175256	0.182864	2
AGAP3	0.31496	0.411711	0.555015	0.739801	-0.182186	-0.205283	-0.164564	-0.00741473	-0.0483356	-0.13589	11
AGER	-0.0298467	0.0348354	0.286457	0.340031	0.416059	0.341589	-0.0562287	0.0511158	-0.197399	-0.482273	1
AGFG1	0.77925	0.812489	0.511905	0.356715	-0.287524	-0.34627	-0.000321547	-0.0306234	-0.59699	-0.526661	15
AGFG2	1.63676	1.30009	0.118876	0.292737	-0.427448	-0.623095	-0.271808	-0.24593	-0.587589	-0.951915	3
AGGF1	0.35618	0.466815	1.26434	1.11798	-0.553604	-0.56815	-0.404914	-0.226904	-0.0844789	-0.662924	1
AGK	-0.807693	-0.616936	-1.15654	-1.06525	0.82499	0.756164	1.34015	1.14433	0.108173	0.226223	32
AGL	1.06888	0.970271	-0.209135	-0.178034	-0.940068	-0.916252	-0.577536	-0.55335	1.33411	0.885335	99
AGMAT	-0.667821	-0.740248	-0.210393	0.06951	0.597827	0.659183	0.652583	0.736488	-0.00908881	-0.0580338	9
AGO1	-0.0226458	-0.0549473	0.196333	0.342672	-0.21742	-0.279964	-0.249555	-0.0908734	0.405152	0.389559	20
AGO2	-0.313276	-0.279099	0.263783	0.243241	-0.21991	-0.20315	-0.160681	-0.0647658	0.753876	0.668791	38
AGO3	-0.235937	-0.281202	0.025464	-0.0612714	-0.0120557	-0.125255	-0.110087	-0.0059167	0.789607	0.695651	22
AGPAT1	-0.811208	-0.822254	-0.711288	-0.783514	0.606413	0.600367	0.688853	0.850885	0.468048	0.698469	7
AGPAT2	-1.10783	-0.47108	-1.23146	-0.524886	0.587983	0.671433	0.705102	0.891643	0.701598	0.642986	7
AGPAT3	-0.676441	-0.755337	-0.951271	-0.937743	0.739616	0.605715	0.68372	0.836148	0.683776	0.638458	11
AGPAT4	-0.811175	-0.35101	-1.09379	-1.02658	0.800838	0.449268	0.942593	0.898868	0.649524	0.577757	9
AGPAT5	-0.0521121	-0.206331	-0.741339	-0.863265	0.445078	0.420626	0.80534	0.773012	-0.125955	0.00145893	9
AGPS	-0.247895	-0.235132	-0.550779	-0.469011	0.209428	0.220412	0.525824	0.692613	0.381851	0.432339	85
AGRN	-0.836506	-0.599423	-0.212826	-0.00224984	-0.0391953	-0.0604527	0.495542	0.518102	0.666523	0.728824	76
AGTPBP1	1.21601	1.21182	0.236559	0.00411298	-0.51748	-0.148689	-0.315676	-0.505913	-0.322904	-0.159078	6
AGTRAP	-0.0823047	-0.295869	-0.42202	-0.768888	-0.387973	-0.188227	0.440502	0.638841	1.29618	0.926172	8
AHCTF1	-0.658485	-0.647575	-0.954025	-0.821853	1.53097	1.51117	0.590926	0.317932	-0.0141685	-0.0415293	91
AHCY	1.85719	1.75985	0.728088	0.752831	-0.491339	-0.562281	-0.744386	-0.792738	-0.814271	-0.748909	137
AHCYL1	1.8999	1.76518	0.181132	-0.052421	-0.475302	-0.498677	-0.333649	-0.395654	-0.605488	-0.64655	21
AHCYL2	0.353633	0.364038	0.148618	0.0304712	-0.197856	-0.0545076	-0.184005	-0.181599	-0.429674	-0.26839	5
AHDC1	-1.0326	-0.380509	-0.886677	-0.695014	1.07032	0.992956	0.108778	0.161646	0.745413	0.604665	13
AHI1	0.758944	0.847234	0.316562	0.235169	-0.283594	-0.264406	-0.252722	-0.170235	-0.334612	-0.321591	7
AHNAK	-0.247188	-0.0736585	1.11886	1.22741	-0.102373	-0.0501916	-0.199586	-0.19407	-0.453256	-0.389852	1504
AHNAK2	0.0133435	0.0620375	1.0725	1.09681	-0.235161	-0.267425	-0.191463	-0.0994843	-0.437332	-0.3838	289
AHSA1	1.60127	1.39931	0.119376	0.0961555	-0.464121	-0.698465	-0.255054	-0.233727	-0.423512	-0.564465	42
AHSG	2.92878	2.95451	0.14312	0.238214	-0.678916	-0.776378	-0.635819	-0.52732	-1.23045	-0.98535	28
AIDA	0.0829765	0.152338	0.268499	0.277717	-0.484986	-0.457756	-0.0125531	0.180466	0.409867	0.479983	24
AIF1	0.551367	0.61989	-0.0415961	-0.345434	-0.548761	0.528132	0.196465	-0.714938	1.19874	-0.577774	8
AIF1L	1.17806	1.22903	-0.0198321	0.142504	0.0757925	-0.249574	-0.161364	-0.174668	-0.76066	-0.554954	1
AIFM1	-0.579572	-0.571281	-0.373575	-0.253698	0.763695	0.676223	0.853247	0.866913	-0.303176	-0.175174	100
AIFM2	0.277778	0.196558	-0.33223	-0.509986	-0.237919	-0.281101	0.369767	0.478901	0.301897	0.250188	20
AIG1	-0.638067	-0.756125	-0.928342	-1.55157	0.674969	0.550306	0.797374	0.937512	0.812529	0.805754	2
AIMP1	0.583557	0.52415	0.0832329	-0.0283896	-0.590189	-0.611008	-0.290322	-0.187744	0.781899	0.66997	58
AIMP2	0.286003	0.226178	-0.27742	-0.26569	-0.464904	-0.408438	-0.0473702	-0.0487274	1.05205	0.848153	32
AIP	1.46982	1.48824	0.338877	0.330585	-0.547828	-0.51909	-0.254696	-0.269242	-0.597712	-0.732764	28
AJUBA	1.06869	1.05599	0.59005	0.727192	-0.284085	-0.409388	-0.326386	-0.244617	-0.578565	-0.607662	13
AK1	1.95999	1.88105	0.712757	0.737289	-0.579757	-0.475003	-0.823362	-0.662083	-0.968617	-0.96936	49
AK2	-0.333048	-0.302564	0.580585	0.635669	0.531665	0.527211	0.208402	0.369306	-0.839245	-0.717313	112
AK3	-0.904441	-1.01774	0.273328	0.416471	0.748152	0.656366	0.76675	0.764207	-0.434304	-0.409498	61
AK4	-0.226646	0.100374	-0.136937	0.00290887	0.45098	0.354555	0.410853	0.316413	-0.448367	-0.254876	16
AK6	1.48384	1.64638	0.617023	0.459969	-0.418602	-0.596072	-0.373531	-0.542389	-0.730152	-0.625475	8
AKAP1	-0.732931	-0.65118	-0.718712	-0.731928	0.721494	0.594306	0.892833	1.04545	0.254275	0.316799	37
AKAP10	1.53497	1.58871	0.331551	0.0506398	-0.62337	-0.573351	-0.214694	-0.227596	-0.456899	-0.624635	16
AKAP11	0.803947	0.67364	-0.337947	-0.423726	-0.130848	-0.340595	-0.0495625	0.092849	0.260962	0.182466	7
AKAP12	0.776657	0.781993	0.490095	0.387899	-0.584187	-0.592952	-0.140192	-0.080574	-0.0443069	-0.126273	111
AKAP13	0.947699	0.890724	0.015067	-0.0673662	-0.505876	-0.597536	0.0607356	-0.0268543	0.132975	0.00585484	98
AKAP17A	-0.539865	-0.504614	-0.337385	-0.244379	0.965604	0.993479	0.140146	0.0520598	0.0827979	0.0182525	25
AKAP5	-0.35391	-0.118008	-0.613155	-0.596676	0.219101	-0.134714	0.63199	0.757619	0.308179	0.521194	5
AKAP7	-0.630048	-0.559951	-0.212886	-0.227058	0.209174	0.22812	0.544354	0.481829	0.337193	0.42814	5
AKAP8	-0.496692	-0.242006	-0.112212	0.0142588	0.821424	0.879721	0.0271856	-0.109151	-0.0576859	-0.0263539	18
AKAP8L	-0.368264	-0.293615	0.258257	0.466765	0.151421	0.264533	0.0239495	0.0528777	0.329026	0.345404	28
AKAP9	0.341017	0.427019	-0.126972	-0.236026	-0.351028	-0.393421	0.0561614	0.0872693	0.473531	0.384453	183
AKIP1	-0.576894	-0.640595	-0.173651	-0.0343856	0.635943	0.651192	0.694392	0.588718	-0.271296	-0.169084	2
AKIRIN1	-0.106006	-0.0396833	0.560687	0.531507	-0.0972888	-0.182845	-0.277158	-0.149798	0.27021	0.194714	2
AKIRIN2	0.286435	0.219567	0.375089	0.336045	-0.411416	-0.325174	-0.281855	-0.00924483	0.335113	0.179781	2
AKR1A1	1.57471	1.38567	0.551473	0.500169	-0.447884	-0.323966	-0.56798	-0.476662	-0.762022	-0.689333	51
AKR1B1	1.52122	1.39974	0.772676	0.52387	-0.282846	-0.261942	-0.684923	-0.589061	-0.733703	-0.628568	29
AKR1C1	1.44445	1.37228	0.219248	0.470984	-0.360394	-0.259274	-0.404898	-0.542966	-0.67509	-0.56	2
AKR1C2	1.70914	1.83321	0.947246	0.736507	-0.483145	-0.617078	-0.699196	-0.618754	-1.02835	-0.753738	8
AKR1C3	1.8504	1.68698	0.732201	0.638379	-0.55928	-0.470624	-0.733684	-0.655559	-0.998776	-0.750674	84
AKR7A2	0.999359	0.81195	0.357627	0.355305	-0.142793	-0.188648	-0.322156	-0.231787	-0.569979	-0.467473	14
AKT1	1.31968	1.407	-0.00334263	-0.155546	-0.386853	-0.513806	-0.228668	-0.271322	-0.467047	-0.419243	11
AKT1S1	1.98113	2.0998	-0.0538411	-0.011884	-0.730927	-0.269504	-0.466042	-0.630936	-0.336342	-0.283433	5
AKT2	1.45705	1.45565	-0.0080194	-0.0464791	-0.451243	-0.394576	-0.19685	-0.182763	-0.305079	-0.502523	13
AKTIP	1.29017	1.13754	0.328695	0.0911156	-0.105119	-0.0629297	-0.292797	-0.430266	-0.364612	-0.233858	3
ALAD	1.50506	1.40435	0.720159	0.764206	-0.595573	-0.912743	-0.56449	-0.922958	-0.419708	-0.872707	8
ALAS1	-0.320113	-0.01523	0.257099	0.522341	0.355134	0.0830938	0.591258	0.310794	-0.507344	-0.551263	3
ALB	2.35767	2.54162	0.0519803	-0.0314617	-0.561907	-0.529415	-0.97965	-0.884688	-0.677472	-0.571823	72
ALCAM	-0.613477	-0.7199	-0.916679	-0.979515	0.323559	0.282856	0.871384	0.977618	0.605175	0.653574	50
ALDH16A1	0.955745	1.03487	-0.0749156	-0.0837075	-0.646598	-0.582685	-0.314585	-0.215437	0.617435	0.580732	12
ALDH18A1	-0.719018	-0.785083	0.0342562	0.138065	0.630307	0.665991	0.71335	0.796879	-0.343908	-0.159094	116
ALDH1A2	0.753273	0.744841	0.44245	0.447552	-0.162712	0.0105144	-0.226086	-0.239182	-0.647783	-0.418526	2
ALDH1A3	1.99222	1.78856	0.0668207	0.131288	-0.451577	-0.460295	-0.439643	-0.390119	-0.474756	-0.651547	8
ALDH1B1	-0.682657	-0.564495	0.289917	0.535134	0.761085	0.683654	0.536136	0.460117	-0.63041	-0.524458	81
ALDH1L2	0.0340023	0.0563278	0.160178	0.245167	0.425043	0.427431	0.336373	0.297155	-0.702651	-0.534689	18
ALDH2	-0.625502	-0.615343	0.504357	0.735719	0.669775	0.625034	0.501402	0.517307	-0.742	-0.555224	40
ALDH3A1	1.65466	1.35208	0.538632	0.449554	-0.391074	-0.456422	-0.530918	-0.624883	-0.5418	-0.593952	32
ALDH3A2	-0.475819	-0.509761	-0.931063	-0.994192	0.513467	0.464938	0.939651	1.01768	0.5418	0.600593	57
ALDH3B1	-0.312549	-0.436998	-0.635365	-0.746084	0.198462	0.017241	0.744426	0.644937	0.710745	0.636557	17
ALDH4A1	-0.650547	-0.659335	0.319719	0.676541	0.639058	0.705764	0.560061	0.511841	-0.638365	-0.574883	17
ALDH5A1	-0.908602	-1.07047	0.493488	0.766493	0.838309	0.697711	0.812313	0.618027	-0.695758	-0.443061	18
ALDH6A1	-0.631278	-0.701034	0.487802	0.60512	0.610386	0.428005	0.468425	0.395914	-0.708856	-0.553968	26
ALDH7A1	0.694612	0.538578	0.381467	0.503902	0.26853	0.212475	0.146067	0.0564012	-1.08763	-0.993431	56
ALDH9A1	0.942511	0.820769	0.276426	0.414899	0.0446771	0.136419	-0.137997	-0.0570238	-0.816695	-0.703619	58
ALDOC	2.02722	1.90474	0.406882	0.387386	-0.558293	-0.513276	-0.730506	-0.543642	-0.70805	-0.765131	30
ALG1	-0.160356	0.0489317	-0.438883	-0.429795	0.232871	0.367554	0.316983	0.321603	0.239952	0.269982	12
ALG11	-0.358697	-0.583744	-1.08961	-0.842899	0.53728	0.595435	0.52427	0.699602	0.571611	0.651093	4
ALG12	-1.21842	-0.777521	-0.739434	-0.991359	0.658909	0.710796	0.98009	1.07434	0.610648	0.830582	4
ALG13	0.729818	0.601356	-0.697326	-0.814683	0.307671	0.321338	0.107749	0.192293	-0.180782	-0.203199	9
ALG14	-0.430706	-0.528788	-0.906501	-0.830139	0.868548	0.755774	0.632037	0.569586	0.127965	0.269814	8
ALG2	0.0578347	-0.0186042	-0.695138	-0.546606	0.286271	0.225351	0.472334	0.555958	0.239579	0.302363	23
ALG3	-1.34554	-0.912482	-0.890597	-1.01215	0.715902	0.872611	0.886253	1.17917	0.287135	0.717882	5
ALG5	-0.458026	-0.377319	-0.829184	-0.781747	0.505805	0.463175	0.661458	0.713063	0.442575	0.508846	24
ALG6	-0.137942	-0.117151	-0.631371	-0.636996	0.153263	0.16444	0.474989	0.529572	-0.0868947	0.397746	5
ALG8	-0.304853	-0.215481	-0.800459	-0.891517	0.403732	0.34851	0.559304	0.728772	0.492279	0.630004	8
ALKBH1	-0.781565	-0.450387	0.545713	0.537778	0.688014	0.590202	0.592315	0.415809	-0.502874	-0.671087	4
ALKBH2	-0.802703	-0.57888	0.636803	0.48428	-0.134257	-0.209241	-0.224555	-0.332333	1.26344	1.19647	8
ALKBH4	1.31024	1.15363	0.52056	0.495817	-0.376147	-0.714317	-0.307057	-0.434084	-0.449977	-0.368108	4
ALKBH5	-0.226435	-0.432486	1.02352	1.104	0.316862	0.360879	-0.553911	-0.604278	0.00826377	-0.00895729	15
ALKBH6	1.41767	1.40558	0.473902	0.184136	-0.402517	-0.331718	-0.271971	-0.429489	-0.827772	-0.51348	2
ALKBH7	-0.66093	-0.668384	-0.337312	0.0669878	0.664648	0.778182	0.779563	0.801032	-0.354167	-0.36528	1
ALKBH8	2.00551	1.83337	0.812581	0.882295	-0.863307	-0.323644	-0.977546	-1.11437	-0.856417	-0.694136	1
ALMS1	0.422976	0.388612	0.130566	-0.125574	0.0920414	-0.11228	0.000237184	0.108261	-0.290486	-0.200141	6
ALPI	-0.484843	-0.207355	-0.758006	-0.78966	-0.0312904	0.0708438	0.751266	0.963445	0.721513	0.468425	2
ALPL	-0.706738	-0.856931	-1.15248	-1.02013	0.171857	0.129669	0.860396	1.06232	1.11467	1.10274	66
ALS2	1.55455	1.50326	-0.0396912	0.0560933	-0.408638	-0.608791	-0.0783673	-0.268195	-0.47551	-0.561956	8
ALX1	0.0808891	0.366748	0.240861	-0.0524774	-0.120282	0.180681	-0.188919	-0.0357662	0.159994	0.0726125	1
ALYREF	-0.465131	-0.452764	-0.796211	-0.778029	0.931778	0.893203	0.200869	0.197007	0.658605	0.510976	75
AMACR	-0.383282	-0.438955	0.0220023	0.10284	0.271982	0.0372126	0.440547	0.416798	0.144746	0.172022	20
AMBN	2.67698	2.88304	1.48564	1.18022	-0.651002	-1.68918	-1.39828	-1.55181	-1.7601	-0.47117	2
AMBRA1	-0.311193	-0.222721	0.922446	1.00629	-0.201074	-0.174211	-0.331382	-0.163614	0.259727	0.0889284	10
AMDHD2	2.41224	2.36505	0.56154	0.532454	-0.913761	-0.843133	-0.691955	-0.90381	-0.856561	-0.805045	3
AMER1	-0.0753214	-0.565291	-0.0405277	-0.118869	0.191953	-0.375294	0.224893	0.400246	0.628038	0.434513	1
AMFR	-0.466257	-0.360508	-0.974692	-0.971636	0.433353	0.378423	0.696467	0.707549	0.602159	0.554113	10
AMIGO2	-0.304839	-0.370813	-1.03161	-0.713791	0.0439214	0.0112883	0.763367	0.852815	0.951119	0.879191	4
AMMECR1	1.25271	1.06375	0.673831	0.626598	-0.319267	-0.11018	-0.490263	-0.319632	-0.774306	-0.588712	3
AMMECR1L	-0.0670274	0.330962	1.22566	1.02695	-0.327045	-0.0858568	-0.189234	-0.34407	-0.310604	-0.321584	5
AMOTL1	-0.644498	-0.595726	-0.196163	-0.0653218	0.367892	0.313321	0.744076	0.561732	0.0914354	0.155861	7
AMOTL2	0.576705	0.535819	0.376908	0.698406	0.0892537	-0.0862658	0.221646	-0.073363	-0.620236	-0.587085	4
AMPD1	0.2605	-0.117787	-0.515326	-0.681702	1.09583	1.05258	0.205219	0.000993142	-0.244168	-0.351795	1
AMPD2	2.00651	1.9291	0.319897	0.39754	-0.612502	-0.618284	-0.630553	-0.582011	-0.664431	-0.622818	36
AMZ2	1.12779	0.983275	0.0897545	0.176171	-0.21387	-0.184119	-0.289073	-0.363191	-0.47519	-0.147205	2
ANAPC1	0.248441	0.18129	-0.14141	-0.224055	0.0336937	0.0684436	-0.285199	-0.380532	0.603726	0.556086	63
ANAPC10	-0.00538572	-0.179233	-0.113083	0.0798761	0.217502	0.198213	-0.202201	-0.467172	0.727521	0.507476	9
ANAPC11	0.348241	0.530861	-0.279272	-0.651831	-0.272596	-0.109699	-0.26612	-0.434382	1.05419	0.784948	2
ANAPC13	0.265621	0.147273	-0.388681	-0.49372	0.0463503	0.193312	-0.123817	-0.366974	0.835378	0.65463	3
ANAPC15	-0.215718	-0.225303	-0.209706	-0.64059	0.580772	0.0877866	0.0888684	0.296266	0.479553	0.462411	1
ANAPC16	0.37533	0.37456	-0.126481	-0.0897207	0.103432	0.187405	-0.572031	-1.06268	0.864843	0.7107	4
ANAPC2	0.245241	0.000607559	-0.103279	-0.187635	0.0510905	0.140148	-0.218273	-0.294872	0.676662	0.519847	33
ANAPC4	0.10696	0.041195	-0.020547	-0.117558	0.0288425	0.0587032	-0.467474	-0.506367	0.660947	0.447319	28
ANAPC5	0.463941	0.35044	-0.072684	-0.242099	0.0074742	-0.00880841	-0.380768	-0.420863	0.528216	0.454953	30
ANAPC7	-0.0245757	-0.128424	0.00415126	-0.098558	0.0423777	0.0324383	-0.169142	-0.185906	0.593653	0.430707	42
ANGEL1	0.0361925	-0.367972	-0.552375	-0.510268	0.142167	-0.0452541	0.377411	0.447925	0.398018	0.517498	8
ANGEL2	0.422612	0.264367	0.670592	0.454699	0.13797	0.0973832	-0.254669	-0.201166	-0.050006	0.0761913	6
ANK3	-0.201237	-0.195338	0.357223	0.339743	0.310394	0.24263	0.238545	0.163258	-0.154698	-0.148953	12
ANKFY1	1.07173	1.09025	0.821781	0.670592	-0.483006	-0.541754	-0.267295	-0.273948	-0.523433	-0.633684	57
ANKH	-0.2731	-0.425617	-0.637553	-0.37726	0.168702	0.139275	0.40207	0.672235	0.675288	0.541023	8
ANKHD1	0.882962	0.902408	0.554569	0.491172	-0.276384	-0.652529	-0.429198	-0.32924	0.0376815	-0.334833	3
ANKIB1	0.389808	0.230057	-0.369952	-0.350983	-0.203559	-0.231551	0.310836	0.387717	0.250589	0.161373	12
ANKLE2	0.00435872	-0.0186024	-0.74247	-0.672837	0.259562	0.261385	0.550461	0.67349	0.281227	0.420602	47
ANKMY2	1.97076	1.76659	0.0993096	-0.0387338	-0.63275	-0.634957	-0.303434	-0.238059	-0.543771	-0.619566	15
ANKRD1	2.12442	2.52344	-0.234951	-0.135564	-0.876784	-0.752933	-1.13859	-1.08851	-0.944541	0.420409	3
ANKRD10	0.498686	0.568547	0.725609	0.773427	-0.0756139	-0.339796	0.00729851	-0.159335	-0.410726	-0.685867	7
ANKRD11	-0.813344	-0.885251	0.169607	0.167851	1.04158	1.05834	-0.100135	-0.254481	0.175917	0.0149464	25
ANKRD13A	1.01316	0.760613	-0.138813	-0.169962	-0.410397	-0.51377	-0.0536779	0.0197844	-0.148271	-0.116578	11
ANKRD17	0.314105	0.266949	0.359883	0.361379	-0.582646	-0.662551	-0.411926	-0.383964	0.800637	0.641379	44
ANKRD26	0.398441	0.425353	0.244748	0.15468	-0.0758257	0.0117476	-0.0407206	-0.00882578	-0.336016	-0.203079	10
ANKRD27	-0.14361	0.106613	-0.309456	-0.369726	-0.235262	-0.151028	0.257242	0.285701	0.460694	0.573933	16
ANKRD28	0.750295	0.797472	-0.139338	-0.185258	-0.266893	-0.454303	0.22687	0.042579	0.130851	0.0409983	18
ANKRD30B	-0.440143	0.0147015	-0.119853	0.871989	-0.384465	-0.346751	-0.880143	-0.857559	1.31997	1.5266	1
ANKRD39	2.06741	2.11199	0.468061	0.396746	-0.501086	-0.685471	-0.460563	-0.869948	-1.06302	-0.759773	2
ANKRD40	0.980993	1.31752	0.725448	1.05185	-0.599896	-0.702622	-0.872562	-0.558317	-0.310831	-0.327241	2
ANKRD44	1.63167	1.60003	-0.12452	-0.185196	-0.55533	-0.572333	-0.175694	-0.244722	-0.0233582	-0.211391	15
ANKRD46	-1.27515	-0.701052	-1.3394	-1.30001	0.778042	0.743578	1.04314	1.07758	0.848192	0.829424	1
ANKRD49	2.04457	1.80052	0.107674	0.705395	-0.710734	-0.389702	-0.571623	-0.645139	-0.887462	-0.749158	2
ANKRD50	0.621508	0.589989	0.331138	0.517874	-0.448801	-0.530072	-0.15135	-0.0903246	-0.0841332	-0.0175999	16
ANKRD52	1.5475	1.47971	-0.0185196	-0.0488192	-0.490192	-0.376633	-0.253785	-0.240344	-0.373608	-0.278716	10
ANKRD54	0.279374	0.573624	0.70979	0.904748	-0.0861949	-0.169124	-0.30727	-0.205326	-0.603118	-0.465987	3
ANKS1A	1.96389	1.69611	0.0512059	-0.0840258	-0.52396	-0.495011	-0.324332	-0.226062	-0.54822	-0.671652	12
ANKS1B	1.95985	1.52402	0.597426	0.539743	-0.651327	-0.937045	-0.437409	-0.660729	-0.99367	-0.899521	3
ANKS3	1.39407	1.26438	0.196484	0.0118252	-0.00358904	-0.0316609	-0.0200318	-0.405334	-0.906733	-0.795066	1
ANKS6	1.46579	1.27404	-0.0137777	-0.0703413	-0.183842	-0.373193	-0.170346	-0.314452	-0.448158	-0.46138	1
ANKZF1	0.49551	0.441284	0.274771	0.299005	-0.407044	-0.545248	-0.325787	-0.289705	0.477944	0.310878	27
ANLN	0.0058299	0.0218928	1.19759	1.21811	-0.294796	-0.308268	-0.161869	-0.0762367	-0.547464	-0.492084	47
ANO10	-0.642436	-0.474873	-1.11004	-1.11606	0.604468	0.608675	0.787686	0.928903	0.534051	0.621732	21
ANO6	-0.237522	-0.256359	-0.754003	-0.662492	-0.0215402	-0.00303881	0.539575	0.622111	0.524429	0.634856	29
ANO8	-0.481047	-0.245231	-0.75599	-0.508604	0.287245	0.381993	0.619262	0.655646	0.430829	0.320238	1
ANOS1	0.0223218	0.106789	-0.733321	-0.774809	-0.381408	-0.453012	-0.0995027	0.046825	1.49838	1.33672	11
ANP32A	0.462434	0.416687	1.63711	1.59201	-0.128323	-0.165443	-0.526488	-0.608702	-0.885257	-0.98159	72
ANP32B	0.377018	0.553288	1.71958	1.83147	-0.109335	-0.0999715	-0.656892	-0.628507	-1.01682	-0.932876	45
ANP32E	0.393897	0.431721	1.38021	1.28115	-0.210162	-0.220538	-0.499009	-0.548048	-0.794599	-0.796041	32
ANPEP	-0.0862296	0.178518	-0.789594	-0.625464	0.0724516	0.0636698	0.50536	0.553141	0.483492	0.467794	23
ANTXR1	-0.838608	-0.759103	-0.870089	-0.618751	0.388389	0.218667	0.898809	1.01571	0.81069	0.999746	17
ANXA1	1.71871	1.68046	0.707714	0.653634	-0.542212	-0.459992	-0.57292	-0.621862	-0.816328	-1.01092	214
ANXA10	2.26834	2.10066	0.482469	0.370563	-0.385678	-0.536143	-0.609583	-0.59855	-0.870746	-0.641705	13
ANXA11	1.26415	0.988772	0.423938	0.273262	-0.374114	-0.275348	-0.249808	-0.304461	-0.357954	-0.450838	63
ANXA2	1.23957	1.19472	0.685639	0.82282	-0.499523	-0.453209	-0.558709	-0.558806	-0.491301	-0.518557	595
ANXA3	1.7917	1.73141	0.735082	0.635247	-0.628465	-0.534642	-0.791106	-0.841913	-0.831828	-0.716515	153
ANXA4	1.61322	1.52863	0.757549	0.718613	-0.490096	-0.450111	-0.741305	-0.675273	-0.581409	-0.799213	81
ANXA5	2.13203	2.02255	0.859523	0.762267	-0.639258	-0.666567	-0.885081	-0.968321	-0.860443	-0.853495	186
ANXA6	1.90929	1.8019	0.455887	0.308437	-0.643511	-0.405173	-0.677913	-0.762203	-0.528125	-0.623935	184
ANXA7	1.22922	1.22871	-0.0369842	-0.262766	-0.415172	-0.422952	-0.143134	-0.180093	-0.280994	-0.338651	33
ANXA8	2.33044	2.127	1.08924	0.934613	-0.751593	-1.01801	-1.07858	-0.64553	-0.928731	-1.35451	2
ANXA8L1	2.56635	2.49145	1.37559	1.27479	-0.582866	-0.908121	-1.411	-1.34522	-1.40535	-1.35128	1
ANXA9	-0.270916	-0.17059	0.652952	0.357805	0.0603169	0.0219426	-0.575909	-0.591119	0.654321	0.565537	1
AP1AR	-0.364255	-0.368371	-0.578656	-0.435597	-0.323483	-0.203461	0.402525	0.741856	1.44499	1.29511	5
AP1B1	0.609657	0.569905	-0.231392	-0.254759	-0.380474	-0.439775	0.0416552	0.0439186	0.500255	0.321432	79
AP1G1	0.41663	0.512434	-0.216448	-0.357069	-0.423222	-0.476945	0.110713	0.0740644	0.684748	0.519784	58
AP1G2	0.71608	0.522659	-0.266693	-0.222555	-0.204573	-0.39769	-0.121348	-0.0411558	0.145419	0.218846	10
AP1M1	0.482601	0.368182	-0.252413	-0.353865	-0.350717	-0.378676	0.0826753	-0.0630885	0.539899	0.313149	34
AP1S1	0.787336	0.851682	-0.374897	-0.256668	-0.317807	-0.364916	-0.0464263	0.0191865	0.438523	0.296682	6
AP1S2	0.78117	0.859164	-0.235304	-0.226115	-0.715039	-0.458918	-0.19222	-0.0420405	0.46957	0.369311	4
AP1S3	0.557353	0.423333	-0.240293	-0.217599	-0.67877	-0.537204	-0.0178224	0.0738441	0.783907	0.586872	5
AP2A1	-0.488663	-0.504812	-0.598985	-0.594284	0.268118	0.257087	0.785622	0.927708	0.375095	0.594946	94
AP2A2	-0.591772	-0.566165	-0.393113	-0.487033	0.287978	0.217825	0.625822	0.837781	0.354383	0.485225	43
AP2B1	-0.278509	-0.379377	-0.484907	-0.580294	0.0845383	0.107917	0.609573	0.756224	0.425886	0.492891	92
AP2M1	-0.768463	-0.804114	-0.442004	-0.404978	0.365192	0.259231	0.831601	0.888799	0.428223	0.576814	59
AP2S1	-0.0638699	-0.0387008	-0.547468	-0.548557	0.134215	0.189627	0.547404	0.523902	0.158434	0.3381	16
AP3B1	1.05269	1.00509	0.148031	-0.0279074	-0.577445	-0.613205	-0.199816	-0.130515	-0.0331087	-0.105401	42
AP3D1	0.970412	0.899201	0.09615	0.100305	-0.447374	-0.497046	-0.0777595	-0.162361	0.0412136	-0.0581784	58
AP3M1	1.00523	0.871819	0.103173	0.0211294	-0.513929	-0.568471	-0.0479673	-0.0517058	-0.00186769	-0.0725994	28
AP3M2	0.926595	0.677706	0.0263488	-0.264558	-0.435671	-0.27199	-0.0225088	-0.0428786	0.167258	-0.0559625	2
AP3S1	0.737167	0.613103	-0.14041	-0.0802704	-0.316159	-0.340488	-0.140951	0.0302337	0.0576911	0.090678	8
AP3S2	1.10216	0.737696	0.0346679	0.173093	-0.466814	-0.401704	-0.171157	0.00257292	-0.130648	-0.175527	1
AP4B1	0.96113	0.846268	-0.261466	-0.397342	-0.371208	-0.438836	0.0759469	0.0469703	0.0676034	0.239471	6
AP4E1	1.1489	1.0792	-0.306475	-0.437969	-0.489295	-0.428591	-0.0285815	-0.0523268	0.212095	0.0778234	17
AP4M1	1.23777	1.00471	-0.291654	-0.231245	-0.465846	-0.410601	-0.117283	-0.0480843	-0.00168648	0.0197207	10
AP4S1	1.04938	1.00425	-0.275411	-0.322033	-0.638378	-0.658214	-0.238703	-0.117736	0.504233	0.255779	4
AP5B1	0.530154	0.551017	-0.0711301	-0.04203	-0.42721	-0.669158	0.0727588	0.169896	0.421964	0.382186	9
AP5M1	0.348805	0.367847	0.09217	-0.0354512	-0.517181	-0.636101	0.0163254	0.0906807	0.361741	0.492386	9
AP5S1	0.0720189	0.135745	-0.312741	-0.344517	-0.424145	0.00360726	0.114053	0.0661292	0.275214	0.669547	4
AP5Z1	0.51291	0.43509	-0.0764159	-0.04628	-0.444334	-0.436315	0.181444	0.176625	0.0895135	0.0802339	10
APAF1	1.55862	1.54365	0.246801	0.217137	-0.595429	-0.32707	-0.305122	-0.53211	-0.41256	-0.472909	9
APBB1	0.522778	0.393754	0.242348	0.306793	-0.14103	-0.44973	0.0797945	0.162718	-0.173838	-0.214682	8
APBB1IP	0.900991	0.341265	0.133081	-0.0179853	-0.788875	0.511477	-0.681187	0.164931	0.109466	0.0311766	1
APBB2	-0.792079	-0.844118	0.252071	0.182914	0.0663917	0.13345	0.516617	0.417996	-0.012088	0.0272581	13
APC	0.100113	0.104636	0.334822	0.266033	-0.22723	-0.313063	-0.0521326	0.0688872	0.0620646	0.171984	24
APEH	2.17934	2.01929	0.261632	0.239974	-0.8456	-0.788717	-0.696051	-0.662761	-0.406847	-0.440257	58
APEX1	0.0369251	0.044126	1.17816	1.25542	-0.214142	-0.0587299	-0.450833	-0.327017	-0.418882	-0.461888	101
APEX2	-0.470512	-0.546451	0.500527	0.542707	-0.184614	-0.180537	-0.0405979	-0.0418917	0.116698	0.244601	7
APH1A	-0.00775083	-0.0962872	-0.593263	-0.504305	-0.268695	0.126924	0.822887	0.975004	0.518973	0.594873	6
API5	-0.107277	-0.0278006	0.566822	0.491306	0.170715	0.220047	0.0571834	0.156477	-0.300631	-0.247394	92
APIP	1.12489	1.17875	1.29897	1.2591	-0.604718	-0.67589	-0.646594	-0.872819	-0.86021	-0.778112	18
APLP1	-0.0516405	0.464823	-0.0335944	-0.0481043	0.151437	-0.132106	0.105009	0.303602	0.297798	0.349296	4
APLP2	-0.512084	-0.638574	-0.698038	-0.36077	0.383825	0.315157	0.644418	0.623297	0.455861	0.5371	20
APMAP	-0.177922	-0.211653	-0.781552	-0.77815	0.44064	0.478381	0.583048	0.701731	0.305834	0.269781	66
APOA1	2.24949	2.10925	0.251111	0.0807001	-0.711553	-0.828677	-0.597454	-0.458811	-0.743084	-0.717011	3
APOB	-0.480725	-0.463195	-0.97291	-0.753711	-0.0649628	0.0740038	0.922286	1.04906	0.403344	0.559517	23
APOBEC3B	0.0565021	0.0175666	-0.558292	-0.399187	0.765899	0.937014	-0.0516673	-0.0246543	0.131836	0.157607	8
APOBEC3C	-0.0332063	-0.215797	0.401839	0.277392	0.164928	0.104061	-0.517538	-0.605283	0.552428	0.575516	1
APOBR	0.52489	0.597649	0.0766325	0.0240096	-0.771367	0.0744165	-0.29935	-0.438426	0.819198	0.00682349	8
APOE	0.279297	0.17273	-0.772724	-0.776495	0.16013	0.105059	0.67654	0.495015	-0.0671192	0.17059	4
APOH	0.904363	0.932907	-0.0505098	0.236071	-0.431409	-0.362355	-0.240691	-0.0753485	-0.173724	-0.0349637	2
APOL2	-0.225316	-0.167762	-0.756247	-0.646991	0.354423	0.311591	0.634854	0.713503	0.293752	0.403129	21
APOM	0.620044	0.450754	-0.463671	-0.46551	-0.0659741	-0.0163888	0.367414	0.417068	-0.0212755	-0.0477732	3
APOO	-0.127175	-0.275171	-0.832863	-0.842739	0.680596	0.724574	0.809924	0.895781	-0.113962	-0.208383	6
APOOL	-0.117918	-0.179943	-0.683607	-0.753332	0.745616	0.592481	0.808035	0.783942	-0.0502021	-0.121493	21
APP	-0.898077	-0.725359	-0.706717	-0.564621	0.3139	0.278918	0.764758	0.804878	0.522477	0.635093	40
APPBP2	0.777571	0.527406	0.350125	0.326306	-0.608429	0.12795	-0.36993	-0.268765	-0.326725	-0.384448	4
APPL1	1.62021	1.50147	-0.153414	-0.0653347	-0.452979	-0.501064	-0.113522	-0.165701	-0.383436	-0.35034	33
APPL2	1.01428	1.00113	-0.142432	-0.139773	-0.350665	-0.258149	-0.043209	-0.0375605	-0.307523	-0.265933	10
APRT	0.963269	0.771736	0.647343	0.529263	-0.388175	-0.267017	-0.459243	0.000253064	-0.603916	-0.517855	30
APTX	-1.09024	-0.965832	0.524066	0.575115	-0.0238174	-0.06055	-0.0678657	0.124651	0.981586	0.936501	18
AQP3	0.530117	0.506353	-0.363344	-0.142149	-0.364349	-0.575991	0.570575	-0.0721738	0.388877	0.226426	1
AQR	-0.526269	-0.462011	0.617192	0.590593	0.543812	0.614722	-0.233841	-0.246007	0	0.0142116	74
ARAF	1.84729	1.46046	-0.550952	-0.565289	-0.133639	-0.529655	0.00417858	-0.0809765	-0.208337	-0.26348	10
ARAP1	1.42425	1.39888	0.0608801	-0.0701934	-0.420146	-0.392009	-0.148428	-0.133566	-0.460964	-0.38314	27
ARAP2	0.926804	0.942092	0.290104	0.000626062	-0.365243	0.0531167	-0.422304	-0.370534	-0.051889	-0.298432	1
ARAP3	1.29136	1.21288	0.122922	-0.21456	-0.623597	-0.36007	0.0879962	0.111691	-0.490684	-0.196047	3
ARC	-0.901362	-0.867833	-1.29023	-1.69626	1.11417	0.983067	1.35191	0.693001	0.785249	0.53262	1
ARCN1	0.648629	0.515747	0.219439	0.267294	-0.441864	-0.448566	-0.0600952	0.0511587	-0.00131479	0.136494	83
AREG	-0.521937	-0.355543	-1.05467	-0.822077	0.185451	0.0466741	0.641283	0.615072	1.04563	0.924462	2
AREL1	-0.226565	-0.134335	-0.917978	-1.17427	0.239636	0.184555	0.606939	0.71546	0.687798	0.723096	2
ARF4	1.00685	0.927972	-0.0808795	-0.161764	-0.325786	-0.395212	-0.00843553	0.0225743	-0.180054	-0.0612753	39
ARF5	0.709364	0.649814	-0.138098	-0.180511	-0.314063	-0.458785	-0.089659	-0.0369887	-0.108931	0.00453105	19
ARF6	-0.413262	-0.36143	0.0203113	-0.0470355	-0.00454736	0.00157085	0.405474	0.597265	0.394287	0.313394	24
ARFGAP1	0.939265	0.914625	-0.489929	-0.597869	-0.261862	-0.360641	0.362774	0.169619	0.186848	0.223893	21
ARFGAP2	2.04698	1.82748	0.0210381	0.0222431	-0.362197	-0.474768	-0.34154	-0.339674	-0.673909	-0.711081	28
ARFGAP3	2.04885	1.90616	0.242365	0.0452281	-0.547164	-0.64002	-0.31944	-0.373863	-0.644196	-0.869163	25
ARFGEF1	1.61697	1.57653	7.19354e-05	-0.0717672	-0.604716	-0.597863	-0.276702	-0.280253	-0.297557	-0.371678	43
ARFGEF2	1.24608	1.18198	0.126538	-0.00443832	-0.469841	-0.47727	-0.0849016	-0.196736	-0.284096	-0.245834	46
ARFGEF3	0.848193	0.608068	0.20927	-0.252442	-0.0739328	-0.0554153	-0.0642783	0.122597	-0.224092	0.0619449	3
ARFIP1	1.83453	1.6329	0.107262	0.0501653	-0.462498	-0.581893	-0.429171	-0.413241	-0.622939	-0.586888	23
ARFIP2	1.19674	1.19408	0.189637	-0.0114039	-0.350884	-0.484023	-0.130608	-0.116905	-0.306754	-0.41013	14
ARFRP1	-0.357259	-0.290662	-0.76987	-0.710505	0.194167	0.189446	0.90053	0.801991	0.558527	0.603315	10
ARGLU1	-0.515704	-0.382381	1.0914	1.17015	0.502607	0.331216	-0.136367	-0.296777	-0.586693	-0.557335	21
ARHGAP1	1.67254	1.55009	0.0152772	-0.2996	-0.250296	-0.779561	-0.0483402	-0.267156	-0.282341	-0.475049	35
ARHGAP10	0.23961	0.241627	0.378292	0.345719	-0.317832	-0.437118	0.13959	0.081093	0.0523564	-0.0581414	16
ARHGAP11A	-0.123481	-0.223861	-0.825434	-0.65361	0.774769	0.679362	0.388444	0.323328	0.107046	0.163716	8
ARHGAP12	1.20551	1.12812	0.182877	0.0811859	-0.334299	-0.680348	-0.237427	-0.267891	-0.213878	-0.230943	16
ARHGAP17	1.54601	1.41637	0.116211	0.163707	-0.583717	-0.514689	-0.2331	-0.235218	-0.372788	-0.356099	32
ARHGAP18	1.54215	1.40706	-0.0208161	-0.13577	-0.621304	-0.450346	-0.126922	-0.236839	-0.267359	-0.414895	26
ARHGAP21	-0.187301	-0.332884	0.0437436	0.0830441	0.112177	0.0319124	0.389329	0.517106	0.10865	0.123377	50
ARHGAP23	0.44798	0.107266	-0.328727	-0.293114	-0.0646866	-0.0262551	0.219328	0.232606	0.266448	0.0449207	10
ARHGAP25	0.818605	0.053987	-0.143871	0.181001	-0.48376	0.225798	0.274444	0.431051	-0.103383	-0.549533	1
ARHGAP26	-0.0975827	-0.112013	0.195431	0.217152	-0.205674	-0.149712	0.0145371	-0.113182	-0.0522622	0.048472	3
ARHGAP27	1.49725	1.13109	0.160426	0.0713458	-0.750636	-0.682266	-0.127447	-0.322014	-0.472467	0.0442574	3
ARHGAP29	1.02464	0.843168	0.172727	-0.0121793	-0.361267	-0.475503	-0.0491815	-0.0293159	-0.255269	-0.273682	11
ARHGAP35	1.61919	1.52161	0.15271	0.101316	-0.493274	-0.617341	-0.238227	-0.27673	-0.526033	-0.469627	42
ARHGAP39	-0.203942	-0.406383	-0.141461	-0.234644	0.0480276	0.0273251	0.327783	0.432439	0.288007	0.435626	10
ARHGAP42	0.397884	0.817515	0.233491	0.050722	-0.30288	-0.336434	-0.0401762	-0.146049	-0.223397	0.0680011	5
ARHGAP45	1.12022	1.01466	0.189523	0.206754	-0.448707	-0.321882	-0.126109	-0.0875431	-0.32516	-0.256933	14
ARHGAP5	1.30299	1.22291	0.103867	0.0981502	-0.422985	-0.446647	-0.257741	-0.203654	-0.332715	-0.405798	35
ARHGDIA	2.45065	2.17881	0.279845	0.267065	-0.638929	-0.620662	-0.786304	-0.652699	-0.768566	-0.813053	64
ARHGDIB	0.959552	0.643395	0.00509477	0.252949	-0.615067	0.280321	-0.596707	0.103213	0.229161	-0.321346	62
ARHGEF1	1.75347	1.59963	-0.141618	-0.110016	-0.45722	-0.489222	-0.159859	-0.215557	-0.558599	-0.474456	48
ARHGEF10	1.64304	1.53898	-0.100014	-0.271689	-0.437625	-0.696322	-0.182634	-0.408378	-0.414129	-0.342792	25
ARHGEF10L	1.7385	1.42213	-0.865439	-1.03467	-0.403485	-1.02579	0.41981	0.185564	0.338227	-0.0705115	1
ARHGEF11	0.52036	0.476451	-0.0156164	-0.0351986	-0.161694	-0.166997	0.252855	0.241071	-0.0631927	-0.0399976	20
ARHGEF12	1.17627	1.00193	-0.146386	-0.20966	-0.24663	-0.345978	-0.00224726	-0.0672684	-0.16899	-0.251541	25
ARHGEF16	1.6278	1.61906	0.0840698	0.00316174	-0.365891	-0.320219	-0.311046	-0.252587	-0.468977	-0.496535	19
ARHGEF17	0.0999188	-0.251864	-0.272729	-0.412438	0.364513	0.0649579	0.535395	0.508109	0.180764	0.161072	12
ARHGEF2	0.668597	0.579758	-0.756122	-0.667004	-0.27445	-0.276932	0.292582	0.371096	0.317556	0.359051	51
ARHGEF28	0.393984	0.418657	-0.0343611	0.0359187	0.185157	0.147886	0.233566	0.0993689	-0.308818	-0.467019	1
ARHGEF3	0.0139955	-0.127293	-0.083886	-0.174339	-0.0247184	-0.0965414	0.461273	0.404157	0.209574	0.270001	5
ARHGEF39	-0.226275	-0.000591348	-0.571185	-0.92567	0.331724	0.207102	0.478518	0.237957	0.77925	0.880802	6
ARHGEF4	-0.262001	-0.0524524	0.423282	0.809017	-0.175939	-0.0765396	-0.0563483	-0.0958962	0.288112	-0.0968948	1
ARHGEF40	-0.250094	-0.130883	-0.418786	-0.409512	-0.10474	-0.0892201	0.550343	0.418586	0.670293	0.50417	37
ARHGEF7	1.38964	1.26525	0.269559	0.229879	-0.641258	-0.673643	-0.25421	-0.28148	-0.109476	-0.184604	22
ARID1A	-0.575984	-0.740548	0.155226	0.201121	0.882042	0.94968	-0.172466	-0.233651	0.0853099	0.133828	40
ARID1B	-0.584042	-0.576529	0.248266	0.211596	0.887252	0.921359	-0.159121	-0.267881	0.037094	0.0520564	38
ARID2	-0.461783	-0.583386	-0.652114	-0.681683	1.24576	1.168	0.184069	0.011165	0.450511	0.39437	38
ARID3A	0.548404	0.604793	0.44739	0.353147	-0.213024	-0.122562	-0.193146	0.0153282	-0.562732	-0.173258	1
ARID4A	-0.553348	-0.314552	-0.125027	-0.0657714	0.933627	0.946208	-0.110715	-0.196115	-0.103151	0.0165515	19
ARID4B	-0.894757	-0.806275	0.260201	0.355605	0.829924	0.793156	-0.181601	-0.223767	0.322065	0.26131	37
ARID5B	-0.778112	-0.540271	0.235885	0.129057	0.357111	0.440217	0.363526	0.310516	0.19674	0.21028	15
ARIH1	0.887416	0.944541	0.772751	0.855189	-0.371111	-0.356942	-0.325055	-0.179873	-0.684269	-0.670993	25
ARIH2	1.3455	1.15441	0.691559	0.566501	-0.553508	-0.537815	-0.383712	-0.301611	-0.628494	-0.633342	31
ARL1	-0.159337	-0.0575997	-0.443617	-0.65549	0.219866	0.0440841	0.595564	0.606514	0.241303	0.182425	20
ARL10	-0.423105	-0.607277	-0.57541	-0.740472	0.472071	0.541938	0.814491	0.992747	-0.209756	-0.0162377	4
ARL13B	-0.87287	-0.712543	-1.17759	-1.23926	0.321321	0.356333	0.825106	0.94838	0.835781	0.900169	10
ARL14EP	0.395619	0.434319	0.555327	0.544861	0.20433	0.235008	-0.266806	-0.292012	-0.695789	-0.407028	7
ARL15	-0.833395	-0.648071	-1.39355	-1.11015	0.239605	0.079093	1.02614	1.32401	0.901054	1.27377	8
ARL2	1.43125	1.42249	-0.283954	-0.244071	-0.0937755	-0.420033	0.0516481	0.0181787	-0.497936	-0.608043	5
ARL2BP	1.55634	1.44654	0.787356	0.663844	-0.618634	-0.700981	-0.68216	-0.661916	-0.563452	-0.478242	5
ARL3	2.1029	1.98238	0.265532	0.147449	-0.496457	-0.669683	-0.562006	-0.544871	-0.766538	-0.567309	24
ARL4A	0.843229	0.717016	-0.465074	-0.41887	-0.338434	-0.518954	0.218494	0.27403	0.19117	0.201733	1
ARL5A	-0.195153	0.0930305	-0.0270075	-0.0268083	0.0393955	0.106577	0.418922	0.53331	-0.070141	-0.167785	1
ARL5B	0.939683	0.666253	-0.108031	0.186971	-0.160714	-0.296903	-0.0529357	0.00223396	-0.116808	-0.384942	3
ARL6	1.7628	1.77601	0.0718229	0.0690219	-0.688112	-0.628908	-0.0275174	-0.184213	-0.847959	-0.598602	2
ARL6IP4	-0.260372	-0.0187154	1.53073	1.63898	-0.162786	-0.116796	-0.365749	-0.585584	-0.486743	-0.463373	5
ARL6IP5	-0.338826	-0.296554	-0.899848	-0.709942	0.452642	0.473432	0.52909	0.628684	0.472881	0.541342	26
ARL6IP6	-0.851566	-0.766173	-0.784752	-0.666026	1.66705	1.62823	0.647163	0.567472	-0.358942	-0.383661	4
ARL8A	-0.334252	-0.215481	-0.429839	-0.365989	-0.367169	-0.122104	0.629375	0.749362	0.525103	0.534686	11
ARL8B	-0.238787	-0.227467	-0.873266	-0.699349	-0.233741	-0.119504	0.643865	0.779837	0.859537	0.884015	23
ARMC1	-0.335258	-0.2977	-0.878549	-0.858987	0.657505	0.668245	0.976543	1.08835	-0.258934	-0.0229446	17
ARMC10	-0.988835	-0.682311	-1.21839	-1.21243	0.767283	0.874165	1.25401	1.32851	0.13125	0.346032	18
ARMC5	0.121258	0.282208	0.278049	0.285786	-0.240238	-0.267016	0.134819	0.177491	0.0623413	0.108483	8
ARMC6	1.37115	1.17878	0.0400771	-0.163823	-0.277416	-0.2756	-0.156866	-0.0810808	-0.145472	-0.285447	21
ARMC7	0.854086	0.73285	0.387806	0.43104	-0.157253	-0.353257	-0.021578	-0.54965	-0.516321	-0.103384	2
ARMC8	0.414832	0.457816	0.0747853	0.00892372	-0.220613	-0.218653	-0.380484	-0.355241	0.44109	0.396204	17
ARMC9	1.70238	1.63245	0.0955917	0.111318	-0.462093	-0.708506	-0.564776	-0.606959	-0.759237	-0.473591	5
ARMCX1	-1.2174	-0.663404	-1.01531	-0.701605	0.819135	0.624345	0.878037	1.10912	0.106785	0.202862	10
ARMCX2	-0.260864	-0.448434	-0.891154	-0.956432	0.649116	0.491372	1.07382	1.03928	0.0691223	0.206275	24
ARMCX3	-0.685622	-0.675734	-0.346304	-0.32766	0.536491	0.532958	0.899871	1.04318	0.0734107	0.228709	34
ARMCX4	0.336107	-0.658282	-0.975417	-0.0405925	0.230355	0.560673	0.430454	0.31189	0.0917796	0.417373	1
ARMCX5	0.507672	0.546593	-0.0833768	-0.284341	-0.590264	-0.527879	-0.129241	-0.0490489	0.67295	0.588176	7
ARMCX6	-0.237905	-0.336629	-0.874107	-1.025	0.506288	0.337264	1.07014	0.951707	0.123863	0.206355	4
ARMT1	1.73948	1.85533	0.820621	0.981169	-0.774974	-0.583439	-1.00306	-0.797361	-1.00074	-0.554048	8
ARNT	-0.644362	-0.525991	1.17199	1.24881	0.164446	0.0313849	-0.0242387	0.00947846	-0.289198	-0.306218	20
ARNTL	-0.612339	-0.546297	0.669652	0.859365	0.240892	0.53423	0.154186	0.144602	-0.0331949	-0.36637	4
ARPC1A	0.613438	0.59961	0.11169	0.327646	-0.187525	-0.408121	-0.0613025	-0.0923524	-0.0217376	-0.196308	9
ARPC1B	-0.373432	0.0622613	-0.734107	-0.522855	0.00450537	0.0709849	0.527583	0.64207	0.679031	0.561009	5
ARPC2	1.2355	1.11491	0.000552061	0.160944	-0.389299	-0.349224	-0.270046	-0.203723	-0.280537	-0.25222	96
ARPC3	1.15704	1.00889	-0.0187596	0.083738	-0.442358	-0.383907	-0.288988	-0.285873	-0.161118	-0.339836	38
ARPC5	1.45081	1.42179	0.0776646	0.147773	-0.556448	-0.36523	-0.258987	-0.229721	-0.296523	-0.604142	33
ARPC5L	0.721208	0.617764	0.0321396	-0.0476289	-0.0846818	-0.166309	-0.0470277	-0.0411845	-0.293654	-0.116984	18
ARPP19	1.95033	1.77234	0.998972	0.865756	-0.160744	-0.685401	-1.12877	-1.29953	-1.15578	-1.05711	5
ARRB1	1.1417	1.16353	0.721582	0.672726	-0.351918	-1.11466	-0.369093	0.0129107	-0.762408	-1.00515	3
ARRB2	1.34741	1.13744	0.466449	0.494864	-0.483634	-0.446949	-0.353739	-0.237192	-0.576286	-0.435345	18
ARRDC1	0.24983	0.174786	0.136186	0.120917	-0.454895	-0.637957	0.0453728	0.13449	0.427401	0.374978	5
ARSA	-0.211322	-0.302385	0.54279	0.547571	-0.370611	-0.343494	0.441635	0.420444	0.146819	0.0889678	9
ARSB	-0.859062	-0.854556	0.411729	0.271862	-0.062169	0.022195	0.420586	0.493192	0.310688	0.176698	16
ARSK	-0.52269	-0.548716	0.459959	0.523791	-0.129967	-0.241477	0.398142	0.467957	0.161884	-0.0809758	7
ARV1	-2.28619	-2.47716	-2.65217	-1.77399	1.56777	1.41085	1.95507	1.98293	1.59174	1.65691	3
ARVCF	0.141512	0.0931689	-0.767353	-0.615435	0.120278	-0.0490153	0.634723	0.697603	0.374366	0.294281	6
AS3MT	1.4094	1.25414	0.156508	0.0295099	-0.537121	-0.500978	-0.337673	-0.36532	-0.385663	-0.367276	9
ASAH1	-0.605093	-0.737491	0.182053	0.286145	-0.138	-0.212953	0.609133	0.511577	0.603682	0.44833	28
ASAP1	1.23108	1.07274	-0.0249043	-0.0975355	-0.375724	-0.47456	-0.171498	-0.0805932	-0.195667	-0.154387	13
ASAP2	1.08958	1.12133	0.223222	-0.0361106	-0.442819	-0.278135	-0.291806	-0.116618	-0.29464	-0.314355	11
ASAP3	1.5245	1.49245	-0.26092	-0.385296	-0.208662	-0.428497	-0.0895271	-0.0838488	-0.22698	-0.362161	6
ASB1	1.04912	0.67795	0.0627068	0.144178	0.127026	-0.104749	-0.147976	-0.338819	-0.186922	-0.39311	3
ASB6	1.0707	0.951333	0.412153	0.753428	-0.310693	-0.397956	-0.353233	-0.215584	-0.598879	-0.541557	7
ASB7	0.384524	0.245555	0.926103	0.947129	-0.19445	-0.128195	-0.372112	-0.51397	-0.311146	-0.279098	2
ASB9	1.90923	1.83009	0.341396	0.440906	-0.741869	-0.625729	-1.02164	-0.479558	-0.443839	-0.504649	1
ASCC1	0.530176	0.341808	0.210273	0.0919455	-0.639914	-0.481375	-0.087903	-0.111792	0.557995	0.411344	14
ASCC2	0.0735049	0.0892224	0.140101	0.0766686	-0.506443	-0.452167	0.0817352	0.130148	0.666929	0.458657	27
ASCC3	0.27544	0.244865	0.0955169	0.0843217	-0.452009	-0.512522	-0.0364941	-0.0415172	0.550303	0.378196	142
ASF1A	-0.528013	-0.714563	0.568104	0.501509	-0.244081	-0.234075	-0.248537	-0.040088	0.766577	0.614684	13
ASF1B	-0.306273	-0.631228	0.631064	0.605776	-0.216698	-0.284954	-0.000491457	-0.0150535	0.750785	0.529699	8
ASH1L	-0.115905	-0.290118	-0.690004	-0.678763	0.998783	0.973584	0.0486441	-0.12789	0.225512	0.0371574	23
ASH2L	-0.61231	-0.590192	0.91816	0.900937	0.488029	0.519529	-0.334043	-0.434157	0.015422	-0.0616178	33
ASIC1	0.139801	0.130367	-0.737523	-0.658178	0.100283	-0.00430925	0.376295	0.410664	0.430492	0.516448	1
ASL	1.60734	1.40154	0.566062	0.731977	-0.327521	-0.758033	-0.576977	-0.589084	-0.838366	-0.938239	7
ASMTL	1.67955	1.57356	0.18728	0.0102748	-0.404599	-0.404142	-0.229387	-0.249629	-0.564879	-0.684396	15
ASNA1	0.823843	0.668512	0.0235314	-0.0294921	-0.349061	-0.384801	-0.0683966	0.0665015	-0.0168334	-0.0393978	46
ASNS	1.78492	1.68203	0.35181	0.277687	-0.422705	-0.552303	-0.487067	-0.464414	-0.757861	-0.724732	64
ASNSD1	1.23434	0.53009	0.693984	0.701417	-0.26981	-0.345632	-0.730086	-0.63408	-0.1886	-0.291259	11
ASPH	-0.55927	-0.655017	-0.910208	-0.868142	0.541784	0.53346	0.787838	0.90773	0.389155	0.438173	123
ASPHD1	0.139278	-0.202605	-0.326454	-0.464935	-0.0286288	0.222712	0.967042	0.16472	0.366592	-0.133381	1
ASPM	-0.257106	-0.149599	-0.77386	-0.694399	0.439807	0.378151	0.280758	0.299413	0.808141	0.645694	27
ASPSCR1	0.925901	0.82299	0.181161	0.153555	-0.244885	-0.385332	-0.257645	-0.042369	-0.194105	-0.00217354	4
ASRGL1	1.5412	1.46822	0.615078	0.70361	-0.431227	-0.250379	-0.724571	-0.733911	-0.961626	-0.585683	5
ASS1	2.03904	1.81881	0.590018	0.512119	-0.502752	-0.647073	-0.822435	-0.912344	-0.723303	-0.82518	44
ASTE1	-0.436624	-0.0273343	-0.32516	-0.272506	-0.294216	-0.602396	0.124434	0.00735024	1.28715	1.24364	1
ASXL1	0.411976	0.53563	0.906335	1.00117	-0.101708	-0.462506	-0.369652	-0.336472	-0.37167	-0.508767	1
ASXL2	-0.414154	-0.20688	0.44801	0.418631	0.144795	0.210694	-0.432918	-0.366583	0.641873	0.523738	10
ATAD1	-0.446297	-0.68417	-0.945607	-0.835881	0.669624	0.707388	0.98235	0.971796	0.055408	0.118482	37
ATAD2	-0.647542	-0.691422	-0.854568	-0.966081	1.95367	1.85024	0.74752	0.471231	-0.627818	-0.471346	65
ATAD2B	-0.40744	-0.34131	-0.833525	-0.629872	1.6563	1.70925	0.551088	0.238761	-0.453482	-0.442505	19
ATAD3A	-0.52111	-0.41787	-0.848481	-0.873202	0.753121	0.70648	0.986382	1.07824	-0.072502	0.133442	36
ATAD3B	-0.12136	-0.204725	-0.747615	-0.757217	0.59677	0.394842	0.868034	0.967614	-0.128405	0.102903	25
ATAD5	-0.391532	-0.217498	-0.675171	-0.477806	1.07288	1.10891	0.0784476	-0.0966704	0.243973	0.161564	16
ATE1	1.68781	1.33381	1.10715	1.09304	-0.514293	-0.424331	-0.746787	-0.794497	-0.795539	-0.804895	19
ATF1	-0.672347	-0.722809	1.54328	1.8088	0.54443	0.533572	-0.424275	-0.320484	-0.605618	-0.628457	4
ATF2	0.247928	0.144013	-0.0762601	-0.181791	0.692099	0.722787	-0.0600307	-0.177475	-0.121024	-0.32121	10
ATF3	-1.23696	-0.44447	-0.825062	-0.468102	0.93909	0.971199	0.153866	0.371612	0.382976	0.860191	1
ATF6	-1.21254	-1.14516	-0.847737	-0.922836	0.7078	0.649327	0.957137	0.98332	0.630321	0.712622	9
ATF6B	-0.4065	-0.514519	-0.903249	-0.939461	0.419466	0.302231	0.854848	0.762008	0.575715	0.511383	10
ATF7	-1.25908	-0.8613	-0.244539	-0.191728	0.930882	0.836846	0.428583	0.207478	0.434443	0.256871	6
ATF7IP	-0.329397	-0.615414	1.10551	1.3184	0.433832	0.414252	-0.312671	-0.299527	-0.51701	-0.420274	24
ATG101	1.37855	1.24776	0.500597	0.455119	-0.417236	-0.637089	-0.293164	-0.628192	-0.721748	-0.872175	7
ATG12	1.9524	2.06617	-0.0694028	-0.39644	-0.369746	-0.764524	-0.63381	-0.461702	-0.643279	0.024677	1
ATG13	1.23238	1.13521	0.802473	0.797	-0.210218	-0.460982	-0.464275	-0.362335	-0.824449	-0.618764	10
ATG14	0.488034	0.567641	0.196029	0.00778649	-0.622325	-0.706946	0.198127	0.232298	0.211119	0.132576	1
ATG16L1	1.7415	1.58864	0.314407	0.223081	-0.393382	-0.65573	-0.333771	-0.417775	-0.570754	-0.564687	18
ATG2A	1.51104	1.42857	0.055962	0.0966678	-0.416954	-0.680824	-0.283661	-0.260002	-0.420799	-0.453766	7
ATG2B	1.48552	1.39057	-0.163603	-0.32204	-0.143983	-0.140222	0.188719	-0.138396	-0.460264	-0.556058	8
ATG3	2.30922	2.1311	-0.196506	-0.232346	-0.52708	-0.550801	-0.472843	-0.216247	-0.618795	-0.671792	12
ATG4A	2.31632	2.11899	0.373488	0.07873	-0.965296	-0.563308	-0.383766	-0.589277	-1.20195	-0.479591	1
ATG4B	1.60808	1.60856	0.331902	0.124859	-0.579612	-0.588016	-0.227857	-0.0919996	-0.446906	-0.59545	7
ATG4C	1.36226	0.957208	0.550356	0.638345	-0.470237	-0.458499	-0.466727	-0.11686	-0.43172	-0.560599	3
ATG5	1.43114	1.40492	0.217614	0.280797	-0.455667	-0.608505	-0.378939	-0.234721	-0.321491	-0.687453	4
ATG7	1.87343	1.74629	0.227135	0.194535	-0.554764	-0.57715	-0.424794	-0.402263	-0.590499	-0.627243	22
ATG9A	-0.340265	-0.19933	-1.16477	-1.0032	-0.0225251	-0.00367688	0.606595	0.636819	1.24517	1.13125	18
ATIC	2.01397	1.81423	0.588684	0.550655	-0.642955	-0.675885	-0.724138	-0.625781	-0.732884	-0.758536	150
ATL1	-0.444345	-0.597784	-0.687496	-0.234182	0.37656	0.562324	0.370439	0.66787	0.165793	0.525161	2
ATL2	-0.471121	-0.505987	-0.816715	-0.869244	0.263075	0.218804	0.438449	0.602153	1.07732	1.0061	30
ATL3	-0.587803	-0.648833	-0.857725	-0.789508	0.457908	0.473489	0.531405	0.63911	0.759062	0.782215	98
ATM	-0.322311	-0.335985	0.687036	0.785156	-0.383392	-0.362859	-0.354316	-0.319116	0.655244	0.727816	101
ATN1	0.377654	0.090417	1.20201	1.36506	0.00757074	-0.0927408	-0.483837	-0.562726	-0.390934	-0.444206	7
ATOX1	2.2289	2.15691	0.20192	0.216592	-0.519108	-0.481483	-0.540535	-0.520159	-0.71279	-0.761239	13
ATP11A	-0.244826	-0.117085	-1.16106	-1.25402	0.265183	0.133747	0.640753	0.753847	0.939103	0.831841	15
ATP11B	-0.424615	-0.562298	-0.868429	-1.05059	0.0870491	0.131426	0.700461	0.748242	1.16056	1.01234	25
ATP11C	-0.362552	-0.501071	-1.13963	-1.08122	0.250549	0.271486	0.887598	0.983162	0.956439	1.03218	33
ATP12A	-1.03879	-0.959335	-1.55782	-1.50975	0.63686	0.495267	1.31241	1.36045	0.972769	0.992276	2
ATP13A1	-0.339745	-0.2291	-0.567857	-0.58996	0.44178	0.42866	0.637603	0.67658	0.282067	0.429479	65
ATP13A2	-0.0376529	-0.143752	-0.975782	-0.93869	-0.247153	-0.362973	0.596295	0.763944	0.990091	0.831595	8
ATP13A3	-0.121996	-0.412565	-0.880289	-0.79418	-0.0417967	0.0959426	0.640806	0.657202	0.994472	0.971531	17
ATP1A1	-0.492534	-0.471983	-0.960279	-0.900241	0.278761	0.258442	0.856651	1.02819	0.564873	0.598641	153
ATP1B1	-1.06178	-0.8995	-1.35361	-1.29385	0.561214	0.504349	1.15597	1.29352	0.967031	1.14796	38
ATP1B2	2.83545	2.4158	0.92557	1.06898	-0.749361	-0.727249	-0.973865	-1.22773	-1.18344	-0.840727	4
ATP1B3	-0.515353	-0.61509	-1.1031	-0.802741	0.34934	0.42254	0.971382	1.01549	0.755677	0.720651	35
ATP2A2	-0.19732	-0.18416	-0.757454	-0.687916	0.305241	0.351263	0.607825	0.625124	0.315063	0.363221	97
ATP2A3	-0.781692	-0.661028	-0.884063	-0.715292	0.489014	0.663991	0.705863	0.861354	0.580174	0.589948	31
ATP2B1	-0.565709	-0.708193	-1.16103	-0.995153	0.360744	0.351726	0.896778	1.05568	0.605777	0.878707	36
ATP2B2	-0.602989	-0.449036	-0.846192	-0.743299	0.179231	0.384841	0.744594	0.911309	0.346287	0.779594	2
ATP2B4	-0.47087	-0.346614	-0.961729	-0.986168	0.302083	0.235436	0.795617	0.915045	0.582824	0.719235	39
ATP2C1	-0.600135	-0.652762	-1.27304	-1.18888	0.412697	0.282775	1.01741	1.01448	0.799375	0.886092	43
ATP5F1A	-0.352	-0.463754	-0.712184	-0.689916	0.637999	0.617153	0.850322	0.884222	-0.0302394	0.0910073	423
ATP5F1B	-0.184316	-0.153323	-0.544592	-0.442433	0.501329	0.468794	0.663552	0.687595	-0.110869	-0.0112391	433
ATP5F1C	-0.681534	-0.595245	-0.950566	-0.838572	0.83258	0.75478	1.03332	1.05939	0.183021	0.238859	51
ATP5F1D	-0.131899	-0.0295253	-0.292799	-0.20712	0.338089	0.396267	0.448874	0.472456	-0.166393	-0.0893403	50
ATP5F1E	-1.27582	-1.43924	-0.913434	-0.809832	0.699952	0.840071	0.991528	1.40671	0.509552	0.647016	9
ATP5IF1	-0.726833	-0.720184	0.504845	0.855729	0.748403	0.589066	0.546145	0.504288	-0.657451	-0.664558	32
ATP5MD	-1.5823	-1.75731	-1.85462	-1.67907	1.49155	1.38025	1.82453	1.7068	0.735579	0.766449	13
ATP5ME	-0.143611	-0.196581	-0.736837	-0.773486	0.625934	0.499334	0.873402	0.728324	-0.0446304	-0.0397786	22
ATP5MG	-0.565499	-0.520748	-1.25652	-1.07775	0.588631	0.726793	1.06956	1.07074	0.124752	0.292111	15
ATP5MPL	-1.64578	-1.69155	-1.12916	-1.49181	1.39273	1.0205	1.70267	1.21337	0.768258	0.565106	2
ATP5PB	-0.532355	-0.637865	-0.874944	-0.795276	0.71421	0.676307	0.935864	1.0466	0.126246	0.177526	59
ATP5PD	-0.306784	-0.353762	-0.803302	-0.767385	0.564957	0.628611	0.804962	0.913488	-0.057125	0.101629	87
ATP5PF	-1.21944	-1.09849	-1.39357	-1.30423	1.1473	1.12921	1.38646	0.731424	0.774942	0.605509	26
ATP5PO	-0.585365	-0.571355	-0.923528	-0.791266	0.868719	0.637131	1.02089	1.01729	0.176127	0.286677	27
ATP5S	-0.0863042	-0.139964	-0.335308	-0.238981	0.444656	0.366845	0.657472	0.567908	-0.272733	-0.294964	10
ATP6AP1	-0.161065	-0.25498	-0.923796	-0.989937	0.459648	0.454378	0.666169	0.737161	0.494608	0.589577	10
ATP6AP2	-0.333507	-0.180852	-1.0371	-0.989508	0.514061	0.432714	0.802719	0.780514	0.467134	0.600762	20
ATP6V0A1	-0.221911	-0.124124	-0.992729	-0.884194	-0.0694145	-0.109554	0.504159	0.54159	0.960777	0.87875	33
ATP6V0A2	-0.564519	-0.541594	-0.953958	-0.977882	0.147125	0.100037	0.739428	0.829304	0.979549	1.00617	26
ATP6V0A4	0.0328952	0.133479	-0.849646	0.654502	0.702653	-0.399815	-0.354688	-0.309777	1.11795	-0.0232099	1
ATP6V0C	-1.48635	-1.35934	-1.2546	-1.3207	0.665853	0.239018	1.46596	0.95066	1.76885	1.37008	10
ATP6V0D1	-0.245959	-0.104963	-0.630842	-0.670065	-0.0958325	-0.153679	0.644812	0.720051	0.89706	0.902715	33
ATP6V0D2	0.726426	0.256117	-2.03306	-1.86699	-0.35613	-0.141254	0.795345	0.945625	1.19601	1.18226	1
ATP6V1A	0.982546	0.780616	-0.14223	-0.189209	-0.559246	-0.511896	0.00906413	0.190854	0.117713	0.111369	118
ATP6V1B2	0.364947	0.207583	-0.381205	-0.529668	-0.439166	-0.347599	0.361256	0.533009	0.518477	0.581999	43
ATP6V1C1	0.797404	0.650804	-0.207435	-0.323705	-0.636469	-0.582685	0.135604	0.29437	0.209939	0.305889	42
ATP6V1D	0.790853	0.588895	-0.447335	-0.490011	-0.436875	-0.462446	0.10374	0.171873	0.334192	0.223358	15
ATP6V1E1	0.642427	0.347327	-0.272521	-0.332323	-0.400145	-0.307764	0.0991136	0.363354	0.200638	0.306473	20
ATP6V1F	0.666133	0.487965	-0.707526	-0.703918	-0.202365	-0.183647	0.325561	0.28081	0.493953	0.531833	10
ATP6V1G1	0.56294	0.493848	-0.296806	-0.284006	-0.545972	-0.437037	0.122688	0.416474	0.193681	0.404339	7
ATP6V1H	0.634415	0.486645	-0.319402	-0.415865	-0.256344	-0.258537	0.238361	0.310474	0.321119	0.373142	38
ATP7A	-0.537366	-0.366128	-0.953587	-1.06789	0.24092	0.217044	0.568981	0.72262	0.891634	0.883298	38
ATP8B1	0.592398	0.332089	-0.60867	-0.67273	-0.288397	0.14351	0.779191	0.787573	0.342173	0.494189	3
ATP8B2	-0.386367	-0.237875	-0.834134	-0.69297	0.22694	0.0781784	0.853786	0.89148	0.342551	0.509086	4
ATP9A	-0.159661	-0.282442	-0.743717	-0.800575	-0.153711	-0.149233	0.487806	0.752854	1.20244	1.04195	25
ATP9B	-0.238475	-0.23315	-0.831827	-0.78738	-0.14269	-0.0162823	0.382138	0.555585	0.934417	0.978153	10
ATPAF1	-0.325574	-0.402639	0.157248	0.301481	0.585452	0.548569	0.671307	0.702133	-0.752122	-0.587066	13
ATPAF2	-0.0651446	-0.11358	0.146382	0.328401	0.432376	0.41576	0.455576	0.311245	-0.836726	-0.596497	17
ATR	-0.260737	-0.224022	0.445692	0.484365	-0.245749	-0.218384	-0.174828	-0.115645	0.458798	0.531201	87
ATRAID	-0.482539	0.288042	-0.0769013	0.0943812	0.063354	-0.0503311	-0.0955455	-0.0167901	0.641864	0.338807	1
ATRIP	-0.280375	-0.278747	0.460315	0.524857	-0.350761	-0.236068	-0.190455	-0.149516	0.581115	0.598699	23
ATRN	-0.74426	-0.768781	-0.381083	-0.341037	0.202881	0.117298	0.754082	0.896186	0.766527	0.603876	10
ATRX	-0.810438	-0.787594	0.115739	0.173727	1.04051	1.07957	0.314158	0.209392	-0.310884	-0.191752	101
ATXN1	0.159109	-0.0919157	0.671776	0.740615	0.278338	0.0992754	-0.29765	-0.387377	-0.254395	-0.439419	5
ATXN10	1.56937	1.44785	-0.2168	-0.319046	-0.637296	-0.610257	-0.0484039	-0.0200964	-0.113775	-0.180913	76
ATXN1L	-0.461363	-0.203782	1.03272	1.14581	0.337699	0.402104	-0.323414	-0.46306	-0.45048	-0.26653	4
ATXN2	0.688752	0.589226	0.666393	0.68306	-0.32141	-0.448735	-0.441756	-0.345852	-0.15848	-0.0891051	30
ATXN2L	0.576481	0.532577	0.645439	0.720459	-0.336145	-0.424469	-0.439279	-0.481451	0.0116371	-0.0890688	56
ATXN3	1.392	1.30143	0.473792	0.435001	-0.575645	-0.522799	-0.167466	-0.322865	-0.592105	-0.75373	7
ATXN7	-0.339671	-0.254892	-0.554365	-0.689637	0.378897	0.563867	0.13862	0.128263	0.809856	0.523402	2
ATXN7L2	0.131285	-0.103716	0.276051	-0.0671008	-0.110016	0.283001	-0.0827775	-0.0556125	0.24063	0.192595	2
ATXN7L3	-0.252103	-0.38062	-0.0913387	-0.262913	0.153796	0.311979	-0.233127	-0.0988348	0.796491	0.76101	2
ATXN7L3B	1.64413	1.68641	0.420756	0.580941	-0.506624	-0.174963	-0.284168	-0.783818	-0.685865	-1.19246	1
AUH	-0.934966	-0.437384	0.282082	0.740213	0.788464	0.799269	0.619777	0.780857	-0.322316	-0.264637	9
AUP1	-0.341766	-0.488519	-0.897767	-0.769419	0.498205	0.47569	0.802517	0.789158	0.458894	0.559277	22
AURKA	0.466022	0.391563	0.218753	0.288543	-0.259699	-0.0278635	-0.126087	-0.158496	-0.0342361	-0.0965202	8
AURKAIP1	-1.53493	-1.35383	-1.42568	-1.36004	1.08703	0.851542	0.999872	1.04353	1.08291	1.30041	3
AURKB	-0.463658	-0.671175	-0.323348	-0.253232	0.829722	0.885828	0.366751	0.362907	-0.0776939	-0.0158672	8
AUTS2	-0.161704	0.0592527	1.82478	1.9622	-0.0182944	0.0479073	0.0744808	-0.177126	-0.825168	-0.477164	3
AVEN	1.58079	1.54791	0.311023	0.286104	-0.678368	-0.735046	-0.464985	-0.592249	-0.175654	-0.31571	14
AVL9	0.880859	0.723568	-0.179403	-0.175545	-0.404724	-0.479755	0.0106557	-0.0792796	0.18522	0.176228	13
AXIN1	0.973143	0.879043	0.404677	0.544895	-0.236298	-0.468542	-0.282211	-0.414175	-0.46093	-0.413467	3
AXL	-0.770989	-0.704347	-0.899087	-0.937074	0.219165	0.25002	0.884501	1.00389	0.81509	0.90416	56
AZGP1	0.875264	0.675929	0.0784068	0.0700928	-0.178645	-0.142329	-0.0411544	0.363043	-0.535207	-0.46106	1
AZI2	1.22134	1.07872	0.213666	0.301513	-0.480275	-0.471267	-0.302586	-0.451467	-0.407197	-0.390258	6
B2M	-0.323797	-0.54269	-0.705935	-0.531996	0.162281	0.0658864	0.697115	0.800605	0.808948	0.754909	42
B3GALNT2	-0.660459	-1.29668	-0.739742	-0.641944	0.759998	0.7611	0.807035	0.887687	0.353907	0.473439	2
B3GALT6	-0.545342	-0.529686	-0.989371	-0.992102	0.245647	0.429597	0.929586	1.0409	0.504048	0.551159	10
B3GAT3	-0.837063	-0.335427	-0.713026	-0.754151	0.260422	0.210434	1.03797	0.962062	0.301443	0.526927	12
B3GLCT	-0.780215	-0.196069	0.738888	0.9995	0.136712	0.0287986	0.237608	0.124907	-0.111646	-0.259717	15
B3GNT2	-0.54016	-0.679882	-1.50438	-1.75778	0.502645	0.286855	1.28203	1.30222	0.870933	0.941859	2
B3GNT9	-2.82161	-3.15704	-1.86727	-2.83628	1.5259	1.20862	2.35324	2.37039	1.95293	1.97545	1
B3GNTL1	1.04562	0.974709	0.57789	0.0757769	-0.094662	-0.143595	-0.396752	-0.12389	-0.325028	-0.254502	3
B4GALNT1	-0.535361	-0.198974	-0.759604	-0.751967	0.157762	0.30455	0.504254	0.775551	0.295791	0.543211	5
B4GALT1	-0.0235537	0.0501729	-0.462186	-0.443799	0.0903075	0.008124	0.417264	0.467334	0.285564	0.346696	37
B4GALT2	-0.178344	-0.602173	-0.26418	-0.27678	0.478225	-0.0333569	0.0985945	0.0677984	-0.100686	-0.0374461	3
B4GALT3	0.444441	0.231543	0.793444	0.752476	-0.0307408	-0.135133	-0.0961669	0.0139238	-0.752174	-0.517273	2
B4GALT4	-0.673656	-0.735565	-1.06939	-0.956999	0.348341	0.12738	0.976392	1.03523	0.862805	0.789806	2
B4GALT7	-1.17181	-1.30759	-0.542291	-0.521009	0.219728	0.0923229	0.994236	0.877941	0.429305	0.457592	6
B4GAT1	0.00622265	-0.0925512	-0.315025	-0.257422	0.0528423	0.196348	0.319084	0.301593	-0.168199	0.196665	7
B9D1	0.668366	0.322203	0.0851546	0.0311562	-0.124985	0.206001	0.11748	-0.399065	-0.198219	-0.00375189	1
B9D2	0.280299	0.459378	-0.194694	-0.474443	-0.193352	-0.360274	-0.32864	0.0304782	0.875191	0.610395	1
BABAM1	1.12437	0.884372	0.125969	0.0578141	-0.229338	-0.301333	-0.405567	-0.386626	-0.0434666	-0.0598696	11
BABAM2	1.18209	1.06363	0.0269394	0.0869131	-0.393166	-0.271	-0.471298	-0.418061	0.104427	-0.00848631	12
BACE2	-0.704674	-0.830575	-0.918975	-1.01589	0.126199	-0.0160579	0.68012	0.677793	0.943257	0.718982	5
BACH1	0.754579	0.79332	-0.0602863	-0.0845372	0.119911	0.534113	-0.0577407	-0.274265	-0.498187	-0.498456	3
BAD	-0.278966	-0.31876	-0.71633	-0.977876	0.585645	0.351329	0.700629	0.66091	0.415142	0.303059	5
BAG1	0.614365	0.596431	0.343737	0.460836	-0.288679	-0.189684	-0.421985	-0.492254	0.0785572	-0.00668538	27
BAG2	-0.0725666	0.0916438	-0.539679	-0.410387	0.0802072	-0.0129713	0.25878	0.303527	0.515544	0.403503	74
BAG3	1.53149	1.43405	0.487218	0.551988	-0.522927	-0.510748	-0.513903	-0.607299	-0.846545	-0.740879	36
BAG4	0.628211	0.585563	0.653594	0.491678	0.117359	0.0853269	-0.277528	-0.275997	-0.54707	-0.655288	8
BAG5	0.566918	0.532022	0.431719	0.469262	-0.317841	-0.315539	-0.00532801	-0.057052	-0.239905	-0.310664	20
BAG6	0.477987	0.533486	0.206327	0.124169	-0.316632	-0.291667	-0.0620908	0.03511	-0.100039	0.190251	38
BAHCC1	1.55125	1.86655	0.244477	0.503769	-0.476028	-0.570545	-0.838387	-0.97034	-0.259288	-0.347122	1
BAHD1	-0.423626	-0.434757	-0.269249	-0.274876	0.405102	0.514183	0.0289301	-0.0486228	0.234231	0.314179	3
BAIAP2	-0.306794	-0.244831	-0.602796	-0.547722	-0.294835	-0.296977	0.375727	0.457231	1.06521	1.04516	38
BAIAP2L1	-0.309399	-0.31844	0.0258459	0.154002	-0.365444	-0.389267	0.0468752	0.195198	0.743018	0.801641	37
BAK1	0.275457	0.185999	-0.256159	0.0716175	0.114406	0.282005	0.389089	0.210778	-0.264257	-0.418578	5
BANF1	0.123351	0.0485508	-0.0945709	-0.2183	0.409502	0.363404	0.127981	-0.253676	0.0737463	-0.146535	44
BANP	-0.353123	-0.800863	0.327385	0.314253	0.749372	0.742512	-0.039534	-0.262063	0.0112562	-0.194443	3
BAP1	-0.548319	-0.314962	0.197494	0.133024	0.108262	0.375442	-0.340561	-0.353485	0.887822	0.891533	8
BARD1	-0.310339	-0.467339	-0.417522	-0.39539	0.451774	0.509934	-0.00755418	-0.0629278	1.03178	0.786163	19
BASP1	-0.624626	-0.546542	-1.03782	-1.04456	-0.0819298	-0.209805	0.825628	0.937612	1.30832	1.27274	240
BAX	1.13816	0.919082	-0.292602	-0.119485	-0.219023	-0.110652	0.0665289	0.34893	-0.410069	-0.383362	20
BAZ1A	-0.527104	-0.700859	-0.931501	-0.898027	1.23682	1.19494	0.214166	0.182573	0.580692	0.447333	43
BAZ1B	-0.59067	-0.540967	-0.757215	-0.687767	1.67333	1.58057	0.450832	0.265272	-0.275941	-0.294987	112
BAZ2A	-0.205427	-0.361815	-0.746634	-0.464916	1.16944	1.22579	0.295818	0.00601011	-0.184042	-0.383458	19
BAZ2B	-0.626935	-0.404298	-0.217549	-0.435085	1.068	1.11056	0.343234	0.324967	-0.400441	-0.346851	14
BBC3	1.20109	1.19478	0.228975	0.130341	0.0626256	-0.866904	-0.228501	-0.230296	-0.505213	-0.282558	2
BBS2	0.986731	1.22263	-0.0652816	-0.0360874	-0.175926	-0.371907	0.0442947	-0.284917	0.0510332	-0.0707079	4
BBS4	0.341888	0.124479	-0.724528	-0.75372	-0.0275862	-0.0588573	0.122123	0.289797	0.763769	0.677861	12
BBS7	1.43812	1.28545	-0.00885102	-0.0822717	-0.65238	-0.77657	-0.257978	-0.378319	0.102694	-0.0482868	4
BBS9	0.902794	0.910284	0.0187823	-0.0746272	-0.209552	-0.0350373	-0.205645	-0.350235	-0.300421	-0.178906	3
BBX	-0.566464	-0.517207	-0.446459	-0.522252	0.095511	0.225828	-0.145263	-0.110356	1.35076	1.2513	27
BCAM	-0.468814	-0.357092	-0.843302	-0.755577	0.0616425	0.0435847	0.756036	0.782188	0.795362	0.888615	37
BCAP29	-1.19589	-0.743621	-1.64543	-1.52782	0.941308	0.76705	0.859617	0.987579	0.632916	0.804168	8
BCAP31	-0.696561	-0.735287	-1.20123	-1.03839	0.694329	0.564371	0.877299	0.958491	0.595624	0.592048	77
BCAR1	2.08162	2.02037	0.000273975	0.0337223	-0.483805	-0.512598	-0.38434	-0.373498	-0.729797	-0.813805	12
BCAR3	1.15778	1.0859	-0.203513	-0.134091	-0.243596	-0.272451	-0.151712	-0.0909971	-0.184056	-0.13788	4
BCAS2	-0.253076	-0.266494	-0.604805	-0.515026	0.737049	0.768139	-0.189883	-0.272286	0.658752	0.542583	32
BCAS3	1.78883	1.59507	0.119943	-0.181094	-0.461931	-0.430429	-0.394574	-0.408671	-0.53767	-0.469556	4
BCAS4	0.429353	0.506795	0.72894	0.582443	-0.453441	-0.740107	-0.209426	-0.0228953	0.00954252	-0.219262	3
BCAT1	2.44949	2.29262	0.80466	0.664684	-0.714622	-0.987569	-0.994422	-0.801485	-0.758025	-0.987683	4
BCAT2	-0.792416	-0.504708	0.443824	0.56566	0.566025	0.550807	0.494429	0.511035	-0.67161	-0.641459	37
BCCIP	-0.294989	-0.235196	1.05804	0.974239	-0.171113	-0.132624	-0.349009	-0.359196	0.226872	0.146609	40
BCDIN3D	1.34849	1.43914	0.154421	0.203669	-0.242281	-0.342799	-0.655071	-0.488394	-0.216361	-0.496474	1
BCKDHB	-0.886885	-0.791408	0.114117	0.417944	0.509828	0.484877	0.528754	0.525742	-0.196008	0.112307	24
BCKDK	-1.13583	-0.813364	-0.0947276	0.19937	0.908539	0.897583	0.727696	0.931422	-0.127612	-0.346946	12
BCL10	2.21107	2.1345	0.805443	0.925368	-0.643394	-0.615174	-0.850038	-0.874486	-1.38397	-1.16628	10
BCL2	0.0281662	0.0988956	-0.0993303	-0.0758218	-0.401941	0.256983	0.00572297	0.376995	0.0817725	0.432898	2
BCL2L1	-0.125095	-0.276722	-0.916391	-0.853004	0.502491	0.486104	0.744806	0.7102	-0.0313376	0.159964	4
BCL2L11	0.278906	0.512056	-0.180546	0.0839054	0.18513	-0.105815	-0.089133	-0.0848438	0.0202607	0.08442	1
BCL2L12	-0.232227	-0.189491	-0.531196	-0.713728	-0.0785066	-0.0391288	0.623111	0.814265	0.438192	0.657888	6
BCL2L13	-0.0976044	-0.0150457	-0.817828	-0.75106	0.450983	0.374606	0.741931	0.817449	-0.058504	-0.00212259	26
BCL3	0.53997	0.805099	0.394312	0.292522	0.178272	0.291992	-0.166625	-0.408615	-0.832144	-0.390443	1
BCL6	-0.374495	-0.161648	0.209876	0.11072	0.20241	0.319932	-0.137904	0.138114	0.354408	0.0429278	1
BCL7B	-0.0198192	0.1933	0.285389	0.294651	0.324037	0.651011	-0.314017	-0.547208	-0.50239	-0.393356	3
BCL7C	-0.498128	-0.602599	0.155787	0.180141	0.807509	0.723433	-0.185355	-0.0847155	0.0235036	0.0561544	9
BCL9	-0.137086	-0.136177	1.057	1.26972	0.0503077	0.106357	-0.122821	-0.1269	-0.739306	-0.516754	2
BCL9L	-0.138364	-0.283764	1.72061	1.93533	0.206199	-0.00813963	-0.469446	-0.220784	-0.807558	-0.724388	11
BCLAF1	-0.703145	-0.696383	-0.125575	-0.0320375	1.12462	0.984576	0.0444677	-0.00601956	0.272279	0.20811	64
BCLAF3	-0.93146	-1.01494	-0.414956	-0.472961	1.20658	1.40357	0.474204	0.280307	0.25916	0.21742	4
BCOR	-0.526004	-0.383716	0.0217933	0.0424971	1.01167	1.02477	0.105429	0.0207968	0.0224125	-0.0363356	28
BCORL1	-0.072285	0.27397	-0.106798	-0.121203	0.472662	0.697991	0.0296958	-0.281823	0.295684	-0.0417054	5
BCR	1.19742	1.00052	-0.176929	-0.11273	-0.447528	-0.442718	0.0390611	-0.00110875	-0.0922412	-0.0390024	29
BCS1L	0.112589	-0.0060221	-0.695953	-0.635629	0.166022	0.304378	0.381911	0.483556	-0.0706926	-0.0632783	22
BDH1	-0.902427	-0.733811	-0.741737	-0.651381	0.659702	0.664433	1.03938	1.04923	0.105945	0.28265	15
BDH2	2.16298	2.08167	1.00636	0.853433	-0.685444	-0.513273	-0.565999	-0.819854	-1.02743	-1.0286	4
BDP1	0.0124407	-0.451326	-0.210571	-0.0420892	0.419472	0.405767	-0.449924	-0.699415	0.897112	0.591514	4
BECN1	1.06824	0.806831	0.173538	0.0716212	-0.542837	-0.544071	0.0490606	0.0607543	-0.115095	-0.0623109	18
BEGAIN	0.586645	0.296717	-0.147537	0.0225709	-0.273838	-0.146893	0.0455366	0.101615	-0.15217	-0.0156589	20
BEND3	-0.314263	-0.384653	-0.367603	-0.371167	1.07386	1.02293	0.332599	0.184172	-0.14511	-0.0435046	21
BET1	-0.0635085	-0.0849543	-0.723091	-0.757314	0.188873	-0.0137184	0.369947	0.494865	0.455429	0.557464	10
BET1L	-0.738335	-0.501254	-1.88576	-1.19437	0.450345	0.627104	1.20046	1.34851	0.973478	0.98853	3
BFAR	-0.0366028	0.0136973	-0.971837	-0.829678	0.394958	0.306172	0.652686	0.649006	0.390901	0.372235	3
BHLHE40	-1.75941	-1.99413	0.144873	0.314812	0.670469	0.664644	0.659761	0.767373	0.556972	0.678972	1
BICC1	0.792958	0.676208	-0.415546	-0.287817	-0.233299	-0.595223	-0.0845276	-0.0116589	-0.0354224	0.0241034	3
BICD1	0.631355	0.605288	0.451377	0.533669	-0.397987	-0.363704	-0.1297	-0.148196	-0.402312	-0.194857	18
BICD2	1.3818	1.2991	0.605564	0.680997	-0.429297	-0.489839	-0.376856	-0.35258	-0.700076	-0.494563	31
BID	1.47989	1.38674	0.185245	0.0637435	-0.480803	-0.505707	-0.237823	-0.0742114	-0.225479	-0.296466	10
BIN1	2.25855	2.03154	0.45421	0.491179	-0.583574	-0.788382	-0.702694	-0.539522	-0.615204	-0.644267	25
BIN3	1.45736	1.44048	0.0797094	-0.0426971	-0.371277	-0.446929	-0.172322	-0.296153	-0.336244	-0.294062	11
BIRC2	1.71717	1.43683	0.0182296	0.211171	-0.588889	-0.387768	-0.22338	-0.251185	-0.66544	-0.38725	7
BIRC5	0.214181	0.131264	-0.335418	-0.12885	0.691365	0.695714	0.124954	0.0207195	-0.168194	-0.398757	8
BIRC6	1.49665	1.37356	-0.192395	-0.27209	-0.592352	-0.675534	-0.224398	-0.280905	0.0619205	-0.0879611	73
BLM	-0.224243	-0.321813	-0.662758	-0.674385	0.44697	0.592187	-0.189809	-0.123015	0.842185	0.587266	29
BLMH	1.7608	1.62903	0.313921	0.25938	-0.663359	-0.660096	-0.505667	-0.441921	-0.361021	-0.543591	35
BLOC1S1	0.162801	0.0976382	-0.3013	-0.277152	-0.572379	-0.621469	0.153032	0.311146	0.7424	0.666642	5
BLOC1S2	0.59808	0.330458	-0.18433	0.112434	-0.515772	-0.643413	0.0795214	0.149113	0.508209	0.404634	3
BLOC1S3	0.721037	0.514934	0.410446	0.41032	0.00743789	0.00268419	-0.337574	-0.354602	-0.343656	-0.326686	2
BLOC1S4	1.80161	1.61652	1.07096	1.08065	-0.457498	-1.19573	-0.813866	-1.03385	-0.885045	-0.479395	2
BLOC1S5	1.42623	1.30955	0.989992	0.959993	-0.644363	-0.768476	-0.349812	-0.456959	-0.68165	-0.768478	3
BLOC1S6	0.964555	0.848717	0.215048	0.373746	-0.365743	-0.407521	-0.259089	-0.0445336	-0.559601	-0.153768	5
BLVRA	1.99671	1.90434	1.01286	0.751931	-0.600474	-0.798664	-0.57683	-0.888515	-1.07358	-0.78325	20
BLVRB	1.84364	1.56388	0.375251	0.203025	-0.400451	-0.312132	-0.473554	-0.411575	-0.586146	-0.502447	23
BLZF1	-0.169427	-0.0254918	-0.335877	-0.227331	0.0565031	0.0455345	0.612341	0.604315	0.108254	0.0711254	8
BMP1	-0.521697	-0.587659	0.169853	0.204316	0.127223	0.147943	0.364784	0.355471	0.164432	0.223798	17
BMP10	1.86628	2.06745	0.326733	0.149897	-0.350185	-0.497675	-0.618398	-0.737704	-0.727919	-0.774141	1
BMP2K	-0.235731	-0.232872	-0.490002	-0.501304	0.279684	0.276915	0.601774	0.574664	0.387008	0.474081	7
BMP6	-0.640888	-0.746623	0.366324	0.624532	0.0185767	-0.0611295	0.515866	0.413323	0.153165	0.0880805	5
BMPR1A	-0.0390785	-0.157364	-0.526393	-0.516039	0.117682	0.191746	0.218769	0.454397	0.307904	0.520323	4
BMPR2	0.105514	-0.0195719	-0.866875	-0.782716	0.0736612	-0.0133567	0.564913	0.48004	0.446324	0.516755	9
BMS1	-0.659451	-0.624828	-0.898523	-0.949651	1.26982	1.31895	0.204609	0.0332458	0.597397	0.435348	63
BNC2	-0.922314	-0.975589	-0.278543	-0.200855	1.7175	1.74254	0.392052	0.238218	-0.318074	-0.690597	2
BNIP1	-0.134323	-0.142557	-1.00682	-1.03095	0.427478	0.448564	0.548306	0.627448	0.22818	0.389105	8
BNIP2	1.52116	1.47496	-0.0718953	-0.20365	-0.585949	-0.764326	-0.0387922	-0.29521	-0.000910986	-0.308478	6
BNIP3	-1.0424	-0.575918	-0.673061	-1.01061	0.577486	0.581239	1.3522	1.34191	-0.171729	0.325217	5
BNIP3L	-0.51325	0.288602	-0.857705	-0.810668	0.477047	0.444042	0.6198	0.827992	-0.021208	0.22235	4
BOD1	1.22234	1.0827	0.466063	0.268516	0.0396	-0.0126002	-0.383433	-0.770364	-0.406874	-0.742592	5
BOD1L1	-0.590229	-0.435003	1.30444	1.37064	0.513028	0.543847	-0.48054	-0.535514	-0.379141	-0.341386	112
BOK	-0.123183	-0.106066	-0.69481	-0.530202	0.503235	0.418924	0.723234	0.649701	-0.0850544	-0.083988	3
BOLA1	1.16736	1.09186	0.301524	0.395611	0.0778819	0.157059	0.0661447	-0.261466	-1.0679	-1.13956	3
BOLA3	-1.59169	-1.25184	0.0637005	0.39149	1.02515	0.874735	0.839844	0.926794	-0.408939	-0.23063	6
BOP1	-0.750817	-0.686522	-0.0456276	0.00582602	1.03732	1.00218	0.0706776	-0.0617491	0.213508	0.168467	54
BORCS5	-0.163091	-0.279584	-0.612916	-0.701702	-0.313755	-0.257654	0.495316	0.528207	0.939037	1.05118	13
BORCS6	-0.246342	-0.30192	-0.427703	-0.335858	-0.257194	-0.335699	0.508585	0.586634	0.840216	0.917854	16
BPGM	1.74451	1.43611	0.30027	0.333998	-0.645329	-0.405846	-0.508005	-0.541828	-0.752528	-0.698528	8
BPHL	-0.288698	-0.021616	0.505642	0.808763	0.497898	0.687883	0.738682	0.631594	-0.924894	-0.658945	9
BPNT1	1.70462	1.54565	0.243408	0.0978325	-0.402696	-0.394373	-0.283223	-0.332302	-0.407399	-0.54815	31
BPTF	-0.515192	-0.600439	0.189334	0.253443	0.936456	0.984422	-0.0377946	-0.112137	-0.120111	-0.196562	76
BRAF	1.85369	1.64717	-0.0936528	-0.0646754	-0.535482	-0.512596	-0.529677	-0.306744	-0.302153	-0.45154	2
BRAP	1.33095	1.19827	0.407091	0.396733	-0.372477	-0.41243	-0.423749	-0.312712	-0.58958	-0.534182	26
BRAT1	0.63064	0.594014	0.050068	-0.102924	-0.389398	-0.414258	0.162519	0.123206	0.108346	0.0792486	42
BRCA1	-0.537848	-0.628307	0.085405	0.223789	0.312053	0.504569	-0.19654	-0.141711	0.687622	0.491417	40
BRCA2	1.86647	1.79221	0.80998	0.631894	-0.280208	-0.209477	-0.884983	-0.894065	-0.747095	-0.662208	9
BRCC3	1.00292	0.899557	0.136493	0.123056	-0.118969	-0.311922	-0.383055	-0.539092	-0.0267662	-0.199563	19
BRD1	-0.13171	-0.0872547	-1.00934	-0.926723	1.48297	1.43652	0.373965	0.201296	-0.129195	-0.0160971	15
BRD2	-0.524565	-0.633664	0.788664	0.812667	1.03526	1.02782	-0.149137	-0.234027	-0.751271	-0.765915	26
BRD3	-0.402474	-0.493399	0.846169	0.906104	0.94493	1.04689	-0.205549	-0.30883	-0.714904	-0.648071	21
BRD4	-0.492854	-0.540081	0.665773	0.784037	1.09385	1.13782	-0.227616	-0.29278	-0.779498	-0.763175	34
BRD7	-0.0786557	-0.0682122	-0.481809	-0.452278	1.10778	1.05362	-0.070544	-0.1068	0.287112	0.0769719	26
BRD8	-0.618061	-0.541714	0.67092	0.773512	0.696148	0.695195	-0.26414	-0.383282	0.0636596	-0.0612601	23
BRD9	-0.961562	-1.11155	-0.148754	-0.135922	0.669192	0.5936	0.207145	0.322992	0.573285	0.521798	8
BRF1	-0.0624741	-0.0178706	0.105997	0.169137	-0.0469406	-0.318939	0.125897	0.263903	0.165588	0.236408	12
BRI3BP	-0.370481	-0.377369	-0.738373	-1.07402	0.773444	0.670327	0.716401	0.608061	0.129174	0.36718	3
BRIP1	-0.338047	-0.30828	0.58367	0.589995	-0.123067	0.0666555	-0.0352324	0.0875746	0.0997374	0.0505878	24
BRIX1	-0.524278	-0.482217	-0.981833	-1.0123	1.60834	1.49927	0.271415	0.0477744	0.445526	0.233823	48
BRK1	1.07822	1.0753	-0.348604	-0.207864	-0.636196	-0.605566	-0.292456	-0.130499	0.4605	0.405956	12
BRMS1	0.13772	0.0510227	-0.2574	-0.0817289	0.388988	0.427405	-0.264779	-0.167031	0.214643	0.181081	7
BRMS1L	-0.400159	-0.518347	-0.0113626	0.0574546	0.640302	0.598893	-0.294392	-0.324815	0.449077	0.30971	5
BROX	1.85177	1.7532	0.66415	0.526399	-0.645194	-0.651284	-0.537671	-0.493659	-0.755841	-0.790533	17
BRPF1	-0.3317	-0.351707	-0.495909	-0.619244	1.27014	1.21008	0.312077	0.116701	0.0152844	-0.0699884	18
BRPF3	0.434626	0.22938	-0.555465	0.0316501	0.915713	0.839263	0.0523375	0.0439571	-0.417086	-0.120348	5
BRWD1	-0.821744	-0.115145	-1.16673	-1.46215	1.85272	1.87647	0.7921	0.591772	-0.735545	-0.270204	4
BRWD3	0.195889	0.157964	-0.536196	-0.372959	0.908303	0.911997	-0.207316	-0.11122	-0.0450192	-0.197103	2
BSCL2	0.136986	0.193063	-0.392856	-0.428384	0.253661	0.138514	0.194896	0.331873	-0.0961624	0.11639	5
BSDC1	1.12762	1.22754	0.171061	0.091085	-0.566785	-0.584986	-0.242742	-0.222336	0.0136775	-0.0797149	12
BSG	-0.285399	-0.222109	-0.68388	-0.688862	0.263742	0.187495	0.55809	0.706258	0.417953	0.505739	108
BST2	-0.355848	-0.281413	-0.565724	-0.449379	0.00218937	0.0901543	0.453667	0.612655	0.56788	0.538977	23
BTAF1	-0.487643	-0.35978	0.348108	0.269512	0.350786	0.381299	0.192199	0.172615	-0.0415384	0.00818617	61
BTBD1	0.31869	0.14598	-0.206049	-0.12317	-0.357814	-0.203976	-0.236149	0.0453516	0.798332	0.741989	9
BTBD2	0.100892	-0.0491938	-0.286384	-0.329783	-0.146768	-0.118167	-0.0316913	-0.0969525	0.814392	0.623408	3
BTBD3	-0.0594181	-0.0982317	-0.308101	-0.232132	-0.12171	-0.0494229	0.150249	0.368618	0.467479	0.706278	9
BTBD7	0.623458	1.47005	0.343482	0.168382	-0.510254	0.344035	-0.106435	-1.03232	0.0811354	-0.677189	1
BTBD9	0.0639324	0.184042	-0.0784992	-0.0290673	0.123374	0.137803	-0.0269509	-0.131276	0.20466	0.256322	2
BTD	-0.314682	-0.446264	0.774447	1.09179	0.0755906	-0.11534	0.0993048	0.0841019	-0.0742125	-0.375443	9
BTF3	1.1844	1.17414	1.11761	1.11014	-0.434336	-0.563836	-0.590179	-0.525566	-0.758358	-0.875971	33
BTF3L4	1.19313	1.32686	0.973566	0.952148	-0.346441	-0.364586	-0.53615	-0.505416	-0.925677	-0.784694	31
BTG3	-1.0398	-0.755943	0.565735	0.295966	-0.231008	0.0197765	0.10918	0.0978141	0.455852	0.461894	3
BTN2A1	0.341919	0.335123	-0.715637	-0.552699	0.0806853	0.0713078	0.420061	0.53151	0.17236	0.439807	11
BTN3A2	0.337071	0.0700089	-0.815503	-0.700616	0.115048	-0.111486	0.688519	0.594094	0.276336	0.44144	3
BTN3A3	-0.533556	-1.08365	-1.02937	-0.829352	0.638898	0.194819	0.804823	0.956903	0.741404	0.843417	1
BTRC	0.0399842	-0.11159	-0.59947	-0.147154	0.126615	0.266671	0.183407	0.0862861	0.841134	0.0184562	1
BUB1	0.66941	0.372316	0.192212	0.145711	-0.0836174	-0.0446936	-0.0533854	-0.0204633	-0.375674	-0.338255	11
BUB1B	1.92926	1.87459	-0.0706368	-0.114344	-0.460602	-0.568589	-0.238589	-0.263775	-0.638587	-0.564868	28
BUB3	0.0479115	-0.0110097	1.24754	1.29433	-0.12079	-0.0333676	-0.52988	-0.395789	-0.294342	-0.283675	57
BUD13	-0.561236	-0.575929	-0.509359	-0.424649	1.02707	1.05279	0.0265477	-0.0217987	0.551332	0.304065	18
BUD23	-0.390693	-0.325659	0.558904	0.609211	-0.20908	-0.0550309	-0.305386	-0.241036	0.573831	0.492811	25
BUD31	0.0536336	-0.218425	0.544714	0.663826	0.902688	0.747998	-0.326388	-0.578574	-0.371613	-0.354575	14
BYSL	-0.359539	-0.276367	-0.738836	-0.675614	0.781481	0.887201	0.141898	0.12004	0.544574	0.443591	45
BZW1	1.70237	1.62425	0.424043	0.278297	-0.517025	-0.572235	-0.464972	-0.46383	-0.616341	-0.644357	84
BZW2	1.89496	1.82595	0.180375	0.140433	-0.526623	-0.530666	-0.384152	-0.408014	-0.670765	-0.702986	54
C10orf76	0.834109	0.931646	0.165303	0.0673011	-0.202873	-0.35114	0.0473059	-0.0492312	-0.288558	-0.415973	17
C10orf88	1.56206	1.35703	-0.0452034	-0.0802125	-0.459775	-0.585591	0.0256718	0.0954973	-0.204337	-0.442004	3
C11orf49	1.14663	1.04204	-0.411173	-0.5716	-0.155793	-0.0767596	0.134416	0.18167	-0.0910695	-0.250032	4
C11orf54	1.44662	1.27535	1.15612	0.876063	-0.457876	-0.52336	-0.6227	-0.431623	-0.469032	-0.489155	6
C11orf58	0.368353	0.642325	1.91958	1.92854	0.0660078	-0.266966	-0.617181	-0.684984	-1.32596	-0.930707	23
C11orf68	1.54099	1.46428	0.560946	0.51245	-0.809506	-0.737357	-0.451242	-0.274904	-0.558717	-0.519059	5
C11orf98	-0.827122	-0.736234	-0.476053	-0.463227	0.0957094	0.0372942	-0.16854	-0.097107	1.53798	1.41204	7
C12orf10	1.59398	1.30246	0.944169	0.91645	-0.335174	-0.437098	-0.691183	-0.798645	-0.839864	-0.740781	29
C12orf29	1.44473	1.41701	0.68994	0.595038	-0.394977	-0.42899	-0.401904	-0.52537	-0.704888	-0.516526	10
C12orf4	0.705722	0.827542	0.387158	0.175509	-0.356124	-0.478673	-0.0854903	-0.166825	-0.334111	-0.268003	3
C12orf43	-0.966353	-0.755377	1.0551	1.00978	0.617574	0.677465	-0.0819843	-0.105936	-0.258306	-0.319517	12
C12orf45	0.490455	0.412501	0.794252	0.812945	-0.316936	-0.300425	-0.386146	-0.421592	-0.359538	-0.522782	4
C12orf49	0.660615	0.507677	-0.397188	0.0640456	0.0184071	0.0900225	-0.150192	0.210228	-0.139708	-0.159568	1
C12orf57	2.40463	2.4914	0.232337	0.134735	-0.659959	-0.753032	-0.736835	-0.944787	-0.312526	-0.943244	5
C12orf65	-0.313086	-0.275155	-0.623775	-0.234748	0.424943	0.445417	0.103687	0.220158	0.177651	0.302524	5
C12orf66	0.78024	0.848723	0.298072	0.371014	-0.334517	-0.881509	-0.39773	-0.145535	0.0628203	0.102762	1
C12orf73	-1.37253	-1.14401	-0.888808	-0.760685	1.09796	1.08026	1.32162	0.956907	0.396877	0.204548	4
C12orf75	-0.56123	1.01301	-1.71834	-0.981756	-0.393777	-0.185514	0.823057	0.555974	1.01618	1.13674	1
C15orf39	0.160558	0.0531466	0.400599	0.376065	0.0482498	-0.107698	0.112837	0.191367	-0.513503	0.0249767	8
C15orf40	1.69679	1.57057	0.609655	0.830967	-0.417777	-0.555465	-0.301111	-0.51258	-1.00764	-1.16112	5
C15orf41	1.5215	1.3586	-0.127768	-0.107058	-0.0823004	-0.397503	-0.10169	-0.224778	-0.460697	-0.544017	3
C15orf61	0.0950302	0.141436	-0.928936	-0.676736	0.113454	0.385041	0.305911	0.717397	0.148109	0.403633	2
C16orf58	-0.571293	-0.610189	-0.976982	-0.701283	0.473668	0.43255	0.746365	0.794747	0.542621	0.466249	23
C16orf70	1.51244	1.51471	-0.0355431	0.00392489	-0.496175	-0.437276	-0.309802	-0.276463	-0.415185	-0.42041	7
C16orf72	-0.234473	-0.408631	0.175435	0.336006	-0.0741862	0.0570645	0.0901727	0.156399	0.297683	0.551229	4
C16orf87	-0.895488	-0.896173	1.52687	1.49586	-0.411441	-0.702795	-0.339517	0.000530246	0.549546	0.376951	1
C16orf91	0.0123876	-0.191123	-1.0356	-0.786206	0.551593	0.552102	0.935621	0.886299	-0.0800631	0.135033	7
C17orf49	-0.926659	-0.388321	0.141255	-0.182629	1.09207	1.05854	0.124939	0.0559314	0.168133	-0.0215349	5
C17orf62	0.158918	-0.0504447	-0.692661	-0.645358	0.377472	0.264304	0.38472	0.439825	0.301645	0.0484231	6
C17orf75	-0.13419	0.0349908	0.170875	0.137859	-0.475359	-0.390543	0.066746	0.175841	0.503062	0.542866	19
C17orf80	-0.172416	-0.276481	-0.625984	-0.577182	0.460216	0.544494	0.770639	0.936111	-0.0697	-0.0759895	11
C17orf97	0.778564	0.880816	-0.130961	-0.185257	-0.496198	-0.985058	-0.395083	-0.512465	0.987435	0.929131	3
C18orf21	-0.371923	-0.348459	-0.723721	-0.450261	0.589324	0.559192	0.0501089	0.0734578	0.767751	0.848349	5
C18orf25	0.0762673	0.00699421	1.6444	1.7102	-0.126471	-0.0801888	-0.470346	-0.473218	-0.947694	-0.965029	15
C18orf32	-0.89438	-0.812866	-1.02752	-1.26901	0.650954	0.600728	0.964929	0.756662	0.908557	0.841337	4
C19orf25	-0.999242	-0.504121	-0.314866	-0.471911	0.40777	0.436621	0.422934	0.423556	0.599546	0.56808	4
C19orf33	1.29104	1.26277	1.38417	1.28875	-0.387228	-0.66041	-0.858278	-0.739544	-0.632405	-0.945846	3
C19orf47	-0.936119	-0.742695	-0.382582	-0.485665	1.28914	1.22644	0.341888	0.360624	0.140188	0.00948922	6
C19orf53	-0.811018	-1.07064	-0.492262	-0.416878	-0.0611423	0.0831349	-0.0713111	0.14981	1.65776	1.66826	14
C19orf66	0.286035	0.490203	-0.134156	-0.12255	-0.561415	-0.341113	-0.194734	0.055767	0.640055	0.589545	3
C19orf70	-0.498748	-0.597627	-0.894017	-1.16965	1.06631	0.566341	1.2619	0.718903	0.000999431	-0.13115	9
C1D	-0.0628188	-0.0543038	-0.571368	-0.642334	0.4297	0.423515	-0.193125	-0.123628	1.17051	0.82703	4
C1GALT1	-0.451013	-0.485207	-0.937106	-0.972543	0.199248	0.165945	0.803558	0.838527	0.715165	0.802021	13
C1GALT1C1	-0.566721	-0.708654	-1.07326	-1.03345	0.343014	0.130747	0.899573	0.885152	0.805959	0.706166	9
C1QBP	-0.520603	-0.672977	0.346016	0.598137	0.5857	0.614989	0.585522	0.640829	-0.688634	-0.56245	98
C1QTNF1	-1.35723	-1.28031	0.235666	0.375679	0.651415	0.398063	0.91144	0.47877	0.349099	-0.0582579	1
C1QTNF6	-0.276477	-0.186458	-0.0531705	0.0657526	0.18341	0.364502	0.621591	0.624581	-0.441027	-0.248036	5
C1R	0.136103	0.327228	0.515275	0.346164	-0.112544	-0.358606	-0.071785	0.0846615	-0.162157	0	1
C1orf109	0.73244	1.03395	-0.246876	-0.33749	-0.251565	-0.863875	-0.179638	-0.029204	0.451829	0.366695	4
C1orf112	0.390361	0.214601	0.225152	0.327777	-0.392757	-0.281969	0.0340124	0.0940144	-0.0285198	0.0358145	12
C1orf122	1.21665	0.932167	1.25777	1.01921	0.0170296	-0.596562	-0.516728	-0.639776	-0.838226	-1.12687	5
C1orf123	2.47009	2.26217	1.27201	1.03739	-0.816026	-0.716261	-1.07822	-1.07996	-1.29486	-1.28037	13
C1orf131	-0.650423	-0.902094	-0.831137	-0.553788	1.22332	1.43199	0.290386	0.25413	0.268153	0.393663	9
C1orf159	-1.0426	-0.981724	-0.655728	-0.968515	0.535904	0.368282	1.06868	1.15849	0.520487	0.701067	2
C1orf174	-1.14699	-1.21281	0.555859	0.652775	1.11062	1.08322	-0.117231	-0.227667	-0.0773106	0.0838731	2
C1orf198	1.6531	1.38762	-0.295394	-0.0642067	-0.413583	-0.516033	-0.164974	-0.23037	-0.614955	-0.458487	11
C1orf21	0.137286	-0.222486	-0.610217	-0.524456	0.197984	-0.00841279	0.3958	0.460787	0.268451	0.306479	5
C1orf226	-0.162479	-0.131893	-0.357302	-0.400678	-0.109039	-0.0466155	0.483595	0.49656	0.259273	0.282776	6
C1orf35	-1.01489	-1.17938	-0.115478	-0.252505	0.634526	0.830372	0.0449716	0.0547277	0.829954	0.45661	5
C1orf43	-0.707501	-0.367256	-0.863455	-0.881305	0.621381	0.566952	0.774822	0.653412	0.71394	0.757388	7
C1orf50	2.23009	2.12907	0.75754	0.856955	-0.610073	-0.782162	-1.06716	-0.828704	-0.773898	-1.01862	5
C1orf52	0.229579	0.487064	1.41843	1.57379	0.072518	0.0672831	-0.734824	-0.861707	-0.746444	-0.786625	7
C20orf24	-0.914996	-1.41803	-2.01867	-1.37462	1.02882	1.01671	1.30796	1.50393	1.07827	1.23224	5
C20orf27	1.91392	1.74906	0.12692	0.121895	-0.626773	-0.421628	-0.388735	-0.572416	-0.798244	-0.449587	8
C21orf2	0.698699	0.782317	-0.0156418	0.179446	-0.24996	-0.339571	-0.12103	-0.167765	-0.0633778	0.00122317	1
C21orf59	1.69698	1.54496	0.177419	0.139348	-0.24079	-0.297137	-0.783011	-0.984684	-0.276	-0.272743	2
C2CD2	-0.711374	-0.213556	-0.838096	-0.395309	0.372457	0.406254	0.70779	0.970882	0.248391	0.405307	8
C2CD2L	-0.764401	-1.27999	-0.739502	-0.747786	0.275176	0.45536	0.982021	0.760111	0.813577	0.949769	2
C2CD3	-0.0923757	-0.0666903	-0.325017	-0.36813	0.0994926	0.169497	0.30559	0.232106	0.551087	0.544454	10
C2CD5	-0.689923	-0.539499	0.213537	0.256161	-0.0340025	0.0491576	0.426715	0.561527	0.276742	0.386645	40
C2orf42	-1.73244	-1.19497	-0.529125	-0.386728	0.315777	0.646096	0.469312	0.574299	1.39161	1.15051	2
C2orf49	-0.23832	-0.437402	1.5332	1.61485	0.253347	0.0725829	-1.05347	-0.729774	0.165771	0.162046	9
C2orf69	1.25372	1.17606	0.322693	0.350277	-0.162964	-0.303585	-0.286464	-0.329951	-0.642601	-0.602051	8
C2orf76	2.79755	2.74834	0.165306	-0.0016268	-1.09045	-0.882482	-0.622317	-0.709123	-0.646657	-0.522309	4
C3	-0.261928	-0.156499	0.365505	0.550668	-0.138586	-0.164397	0.137754	0.210835	0.0230566	0.119015	39
C3orf33	-0.472479	-0.630199	-0.832554	-0.865473	0.594219	0.64056	0.99029	0.949007	0.145091	0.185878	2
C3orf38	1.00446	1.00101	0.002918	0.097609	-0.141355	0.194631	-0.330163	0.0999111	-0.258845	-0.509014	5
C3orf52	1.72547	1.60214	0.172282	0.0758645	-0.484681	0.0493015	0.121844	-0.720206	-0.821328	-1.01635	2
C3orf58	-0.452496	-0.470115	-0.852586	-0.885164	0.213402	0.164683	1.0196	1.00522	0.564388	0.640363	22
C4BPA	1.13251	0.901257	-0.361901	-0.334586	-0.0495763	-0.0119353	0.114176	-0.133009	-0.0604014	-0.492194	1
C4orf3	-1.10951	-0.789882	-1.40924	-1.31439	0.815299	0.840265	1.04886	1.05681	0.768626	0.840845	4
C4orf46	2.22128	2.21332	0.224163	0.633253	-0.128394	-0.44444	-0.165261	-0.899441	-1.35451	-1.59564	1
C5	1.33448	1.11839	-0.78346	-0.671545	0.272851	-0.157301	0.382555	-0.202643	-0.353638	-0.235351	1
C5orf15	-1.15047	-0.767723	-1.14683	-0.860736	0.406121	0.28785	0.842355	1.01586	0.915442	1.10199	5
C5orf22	0.414302	0.537526	1.72953	1.62234	-0.374744	-0.213026	-0.658773	-0.536633	-0.692935	-0.870869	11
C5orf24	-1.27957	-0.985542	-0.864404	-0.756332	1.7504	1.77571	0.77723	0.65737	-0.188901	-0.15923	9
C5orf30	0.454071	0.415661	0.193288	0.214248	-0.0037708	0.17583	-0.00648402	-0.0769311	0.192177	-0.0428872	4
C5orf34	1.45818	1.18367	-0.0566311	-0.0648678	-0.238443	-0.0310634	-0.149884	-0.202937	-0.21824	-0.221636	3
C5orf42	0.710657	0.560882	-0.553443	-0.867244	-0.366663	-0.31726	0.375817	0.171937	0.636791	0.476696	3
C5orf51	1.58264	1.55602	0.113415	-0.152548	-0.860521	-0.768924	-0.0884598	-0.159316	-0.0602866	-0.161401	13
C6orf106	1.27957	1.4347	0.28714	0.319436	-0.284361	-0.322835	-0.279254	-0.268308	-0.805074	-0.398293	8
C6orf120	0.728266	0.887539	-0.260566	-0.0352429	-0.269304	-0.0714178	0.225172	-0.0078996	-0.0484631	0.12104	4
C6orf203	-0.187269	-0.569246	0.482601	0.80029	0.644586	0.742802	0.708022	0.662394	-1.20446	-1.15013	3
C6orf47	-0.632542	-0.95754	-1.08386	-0.966	0.391022	0.537757	0.735434	0.603841	1.12776	0.948473	2
C6orf62	0.686305	0.89419	0.376638	0.206986	-0.198837	-0.205181	-0.00456065	-0.34433	-0.4865	-0.220371	1
C6orf89	-0.0382425	-0.0715865	-1.21788	-1.15002	0.426297	0.409041	0.593909	0.613636	0.695512	0.401873	3
C7orf25	1.32006	1.10648	-0.0115434	-0.00995987	-0.262951	-0.408201	-0.0998381	-0.306685	-0.136531	-0.244571	6
C7orf26	-0.41384	-0.430756	-0.077581	-0.0962316	0.81695	0.826117	-0.199322	-0.281411	0.160627	0.48981	5
C7orf43	0.00318808	0.142818	-0.675228	-0.656248	-0.0510964	0.288027	0.115224	0.0128285	0.819642	0.705184	1
C7orf50	0.0438745	0.111381	-0.492339	-0.508663	-0.216991	-0.0470979	-0.296318	-0.230267	1.1873	1.08818	20
C8orf33	0.411015	0.47173	-0.952726	-1.11606	-0.382257	-0.412373	-0.286425	-0.116958	1.62405	1.46511	16
C8orf59	-0.028938	-0.501845	0.713434	0.687639	-0.0763558	-0.282596	-0.526114	-0.478616	0.295293	0.252969	5
C8orf82	-0.404203	-1.08825	0.202029	0.521296	0.831361	0.885105	0.547322	0.510033	-0.760444	-0.327688	9
C9orf16	2.20268	2.32157	0.797534	0.668132	-0.661526	-0.517041	-0.829142	-0.992015	-1.37181	-0.914045	1
C9orf40	0.617019	0.327213	0.63424	0.318166	-0.485822	-0.559952	-0.594482	-0.182495	0.338536	0.477955	4
C9orf64	2.15966	1.94766	0.968464	0.707426	-0.497694	-0.707556	-0.994447	-0.94693	-1.19204	-0.978091	26
C9orf72	1.53254	1.53559	0.00255771	-0.208607	-0.45256	-0.679446	-0.211383	-0.23099	-0.209513	-0.404287	7
C9orf78	0.00120034	0.0676532	1.51212	1.58752	-0.087774	-0.0728845	-0.550514	-0.61997	-0.54146	-0.556646	34
C9orf85	-0.212057	-0.268978	1.55028	1.78758	0.0191396	-0.301871	-0.45289	-0.764336	-0.249816	-0.402717	1
CA1	1.86968	0.419433	-0.0677223	-0.629664	-0.883901	0.416912	-1.43244	-0.570736	-1.0068	3.00072	6
CA12	0.742506	0.59899	0.0557299	0.032865	-0.173749	-0.284436	0.0047924	0.126235	-0.225092	0.236888	5
CA13	1.86188	1.61495	0.665553	0.547144	-0.465574	-0.672686	-0.761812	-0.892288	-0.563108	-0.572268	6
CA2	1.25164	1.29013	0.490727	0.46734	-0.615353	-0.284566	-0.889381	-0.346823	-0.577449	-0.561671	36
CAAP1	-0.0997031	-0.303832	0.482815	0.523482	0.714764	0.690624	-0.26355	-0.463137	-0.35278	-0.341141	14
CAB39	1.65426	1.59101	0.341705	0.318393	-0.735297	-0.845543	-0.428157	-0.327449	-0.310548	-0.289813	39
CAB39L	2.16949	2.02194	0.734283	0.600347	-2.18444	-1.63208	-0.247421	-0.300606	-0.398885	-0.0582992	1
CABIN1	-0.281169	-0.290132	-0.306364	-0.300103	0.811781	0.881607	0.245294	0.135693	0.0250518	-0.0798203	18
CABLES1	-0.553712	-0.366578	-0.506525	-0.334816	-0.00317068	0.0917075	0.538813	0.658782	0.25645	0.376805	5
CABP7	-0.9862	-0.85031	0.509395	0.651472	0.181414	0.179361	0.606942	0.595056	-0.184524	-0.0877564	6
CACHD1	-0.323455	-0.423043	-0.441927	-0.255597	-0.0333597	-0.0843222	0.467754	0.39588	0.764954	0.677337	11
CACNA2D1	-0.911877	-0.94199	-1.22412	-0.944774	0.311677	0.222456	0.943345	1.06238	1.00759	1.06847	64
CACNA2D3	-0.0516695	-0.110036	-0.345752	-0.237219	-0.127388	0.011589	0.398885	0.463212	0.279751	0.391618	9
CACNB3	1.02069	0.776935	0.298392	0.266218	-0.307184	-0.159445	-0.523876	-0.347556	-0.455396	0.135561	1
CACTIN	-0.49942	-0.308925	0.865462	0.950674	0.479554	0.552463	-0.243271	-0.166981	-0.405901	-0.224657	18
CACUL1	-0.000158077	-0.255003	0.566907	0.602736	-0.106328	-0.0768325	0.0406719	0.186191	-0.263062	-0.283986	9
CACYBP	1.88567	1.73265	0.292304	0.25593	-0.620098	-0.661788	-0.439517	-0.402625	-0.697018	-0.638737	73
CAD	1.73378	1.62109	-0.144909	-0.240536	-0.590767	-0.59634	-0.422561	-0.43602	0.0688522	-0.118892	161
CADM1	0.338388	0.108793	-0.975372	-1.11481	-0.000990808	-0.0998167	0.650289	0.649772	0.256842	0.289986	10
CADM4	-0.217431	-0.566426	-0.75414	-0.659261	0.308546	0.474552	0.64739	0.894996	0.399711	0.80545	5
CALCOCO1	1.64433	1.68486	0.134506	0.0695973	-0.235372	-0.427066	-0.236243	-0.273119	-0.660847	-0.552236	8
CALCOCO2	1.07715	0.841206	0.436644	0.449976	-0.435572	-0.273475	-0.222125	-0.0606981	-0.393931	-0.385408	16
CALD1	0.990452	0.998193	1.42928	1.52849	-0.407268	-0.437838	-0.67778	-0.642846	-0.922914	-0.877003	101
CALML3	2.1797	1.96619	0.105808	0.151079	-0.433698	-0.729985	-0.606933	-0.726419	-0.675856	-0.525545	1
CALR	-0.576328	-0.571068	0.889239	1.10323	0.25261	0.166531	0.282887	0.282551	-0.452082	-0.480029	424
CALU	-0.315619	-0.294671	0.701105	0.951853	0.046968	0.0140793	0.216196	0.155304	-0.307274	-0.291442	226
CAMK1	1.94676	1.79387	0.0941912	0.178548	-0.488565	-0.535869	-0.22926	-0.193883	-0.771441	-1.19073	6
CAMK1D	2.2368	2.06893	0.0594168	0.057777	-0.480905	-0.501102	-0.516553	-0.432242	-0.923655	-0.778971	12
CAMK2D	1.53321	1.49056	-0.0242497	-0.17108	-0.680715	-0.812038	-0.291178	-0.312763	-0.078171	-0.191446	16
CAMK2G	1.30537	1.16454	0.0230676	-0.0313002	-0.535436	-0.596278	-0.242729	-0.29832	-0.0899292	-0.153578	14
CAMK4	1.39628	1.31416	0.0444699	0.066666	-0.452846	-0.694075	-0.184435	-0.0287638	-0.39563	-0.414845	3
CAMKK1	2.11616	2.1522	0.127835	-0.0414118	-0.774095	-0.632382	-0.434435	-0.604205	-0.616041	-0.337263	7
CAMKK2	1.62274	1.47584	-0.0144313	-0.117857	-0.264578	-0.403829	-0.0262535	-0.116119	-0.407644	-0.625361	5
CAMKMT	1.54019	1.33604	0.0481279	-0.0234934	-0.367655	-0.389203	-0.027074	-0.224686	-0.306563	-0.4443	3
CAMLG	-1.11678	-1.02787	-1.07618	-0.623511	0.734976	0.535747	0.880575	0.825869	0.436728	0.663299	9
CAMSAP1	1.39012	1.33677	0.35393	0.172873	-0.522177	-0.627903	-0.33104	-0.429386	-0.427391	-0.350795	41
CAMSAP2	1.5948	1.40171	0.102177	-0.0411922	-0.58027	-0.662784	-0.252784	-0.236906	-0.284436	-0.287615	35
CAND1	0.950657	0.844809	0.365057	0.273675	-0.645899	-0.573078	-0.110261	0.0186594	-0.198814	-0.140203	138
CAND2	0.921492	0.742668	-0.139432	-0.221818	0.626256	0.532655	-0.12219	-0.14605	-0.636896	-0.852345	1
CANT1	-0.372076	-0.466044	-0.844604	-0.924361	0.173171	0.111266	0.766213	0.820319	0.456244	0.45612	20
CANX	-0.615501	-0.551772	-0.985007	-0.908285	0.570067	0.536075	0.818521	0.883202	0.524876	0.438593	319
CAP1	1.91379	1.86519	0.166206	0.112991	-0.67969	-0.594031	-0.531103	-0.459678	-0.612022	-0.577383	108
CAP2	2.05213	1.87411	0.15775	0.181745	-0.614898	-0.727645	-0.518036	-0.527234	-0.704	-0.625231	17
CAPG	1.50207	1.13788	0.0503625	0.483808	-0.548358	-0.266741	-0.408886	-0.36155	-0.335798	-0.294567	50
CAPN1	1.89514	1.77406	0.219907	0.0914712	-0.526435	-0.506325	-0.457824	-0.44791	-0.476316	-0.626735	66
CAPN15	0.775771	0.650263	0.138466	0.277968	-0.334355	-0.209919	0.0249449	-0.187136	-0.167744	0.0709347	7
CAPN2	1.98309	1.90561	0.045779	-0.012088	-0.464285	-0.506749	-0.425519	-0.322825	-0.578959	-0.526676	57
CAPN7	2.10286	1.80786	0.190312	0.0969551	-0.553883	-0.6291	-0.65269	-0.563893	-0.686621	-0.631025	21
CAPNS1	1.85311	1.60279	0.0462949	-0.0493992	-0.486356	-0.415159	-0.0878369	-0.10649	-0.879861	-0.650939	25
CAPRIN1	-0.572885	-0.431418	0.568098	0.683109	-0.160749	-0.154891	-0.451145	-0.347212	0.776193	0.807777	119
CAPZA1	0.894415	0.800416	0.040932	-0.0692338	-0.165302	-0.222925	-0.0995499	-0.081587	-0.184917	-0.163846	68
CAPZA2	0.97184	1.07339	0.0495706	-0.0600543	-0.19082	-0.133542	-0.201018	-0.125075	-0.178986	-0.163295	39
CAPZB	0.898405	0.769532	0.0100278	-0.0345322	-0.244485	-0.137373	-0.17456	-0.117412	-0.108473	-0.203254	107
CARD10	1.2695	1.21987	0.555814	0.505996	-0.510918	-0.654029	-0.304247	-0.398357	-0.442626	-0.536657	2
CARD19	0.530703	0.351132	-0.952362	-0.81478	0.548317	0.542173	0.546275	0.811778	-0.684799	-0.364686	4
CARD6	1.44338	1.2342	-0.236843	-0.363539	-0.302001	-0.42799	0.185847	-0.0848292	-0.0305023	-0.106409	9
CARHSP1	1.77853	1.66878	0.595363	0.430554	-0.254153	-0.381216	-0.419986	-0.659538	-0.805577	-0.848369	8
CARM1	0.262504	0.209806	0.284204	0.323847	-0.171747	-0.369692	0.0810505	0.129626	0.0868818	0.00643834	25
CARMIL1	1.42845	1.33679	-0.0979844	-0.0661506	-0.575251	-0.586717	-0.112653	-0.131956	-0.130427	-0.139982	42
CARNMT1	0.316067	0.512389	1.69052	1.69663	-0.337423	-0.413614	-0.815876	-0.653908	-0.622746	-0.532119	5
CARS	1.90518	1.69865	0.585649	0.59609	-0.565138	-0.584771	-0.699123	-0.67017	-0.719459	-0.660101	63
CARS2	-0.364956	-0.340149	0.172424	0.395515	0.594862	0.49595	0.474341	0.368013	-0.62846	-0.459478	30
CASC3	0.511987	0.325372	-0.966076	-0.833615	-0.277105	-0.63764	-0.0296867	-0.171913	1.61079	1.37094	12
CASC4	-0.88209	-0.798226	-0.739217	-0.815948	0.367673	0.387298	0.975543	0.995929	0.646177	0.635358	36
CASD1	-0.264563	-0.142102	-0.896225	-0.801617	-0.0146033	0.261964	0.580941	0.773402	0.525826	0.681317	1
CASK	-0.850877	-0.777896	-0.689316	-0.51185	0.358233	0.235619	0.714927	0.940688	0.646749	0.683335	35
CASKIN2	0.991728	0.931658	-0.0315957	0.0424801	-0.446049	-0.526119	-0.13415	-0.0289572	-0.00525673	-0.000271017	10
CASP1	1.10532	0.97123	0.38195	0.349184	-0.088872	-0.373337	-0.233329	-0.267446	-0.431345	-0.709015	1
CASP10	1.89218	1.59193	-0.409034	-0.514362	-0.69232	-0.680393	0.189995	0.182117	-0.504617	-0.35116	2
CASP2	0.59135	0.464751	0.511915	0.356207	-0.356111	-0.34526	0.0278449	-0.106893	-0.317884	-0.271663	13
CASP3	1.713	1.44816	0.669657	0.722877	-0.418766	-0.54575	-0.746421	-0.318387	-1.03765	-0.646587	16
CASP4	1.88577	1.79751	0.139102	0.225916	-0.29639	-0.166514	-0.295784	-0.301728	-0.73286	-0.612997	7
CASP6	1.92851	1.6639	0.79078	0.686891	-0.293907	-0.647004	-0.594011	-0.841552	-0.988921	-0.886562	5
CASP7	1.78817	1.72584	0.974664	0.923732	-0.595549	-0.606291	-0.707457	-0.800367	-1.08781	-0.848517	13
CASP8	1.74806	1.63987	0.399539	0.248218	-0.49244	-0.523959	-0.316386	-0.35944	-0.632908	-0.679176	22
CASP8AP2	0.185266	0.286506	-0.343745	-0.222062	0.832192	0.739231	-0.00572453	-0.283129	0.0265141	-0.137258	5
CASP9	1.27818	0.944094	0.547473	0.245613	-0.344381	-0.453157	-0.194495	-0.183807	-0.662187	-0.495958	10
CAST	2.10573	2.0067	0.963214	0.939718	-0.57244	-0.563928	-0.919539	-0.919442	-1.1243	-1.08555	220
CASTOR2	1.60555	1.52769	0.336093	0.139046	-0.360638	-0.693166	-0.114709	-0.373238	-0.0388841	-0.457048	3
CAT	0.0485663	-0.319138	0.342455	0.0349356	0.342819	0.0640467	-0.0632177	0.607984	-0.229851	-0.0285124	129
CATSPERG	-0.226237	-0.0979196	-0.511401	-0.729332	0.168751	-0.0674355	0.341821	0.251462	0.85376	0.72087	1
CAV1	-0.838423	-0.521172	-1.13682	-1.03147	0.627118	0.5665	0.923939	0.914189	0.545746	0.732077	23
CAV2	-0.296288	-0.113557	-0.905372	-0.471623	0.155004	-0.0574286	0.521199	0.621359	0.501256	0.365071	3
CAVIN1	-0.546202	-0.312459	-0.526859	-0.487064	0.263235	0.219372	0.457703	0.597435	0.541677	0.635266	71
CAVIN2	-0.636949	-0.458076	-0.494207	-0.484011	0.314136	0.263467	0.460723	0.544641	0.518914	0.241443	9
CAVIN3	-1.34944	-1.26155	-0.900306	-0.788811	0.70426	0.627764	0.763563	0.612005	0.945244	1.00083	9
CBARP	-1.06464	-0.506339	-1.10246	-1.19018	0.248299	0.440276	0.897486	1.09778	0.980877	0.903245	2
CBFA2T2	-0.00326011	-0.144319	1.10079	1.12191	-0.049539	-0.124829	-0.142267	-0.257318	-0.452887	-0.343947	2
CBFB	1.7599	1.70357	0.336869	0.438055	-0.349892	-0.294804	-0.539741	-0.385937	-0.806966	-0.664108	18
CBL	1.64639	1.75961	0.250639	0.212377	-0.494316	-0.368335	-0.205555	-0.54062	-0.82423	-0.437732	4
CBLB	1.75573	1.66451	0.390174	0.125784	-0.511968	-0.565018	-0.327923	-0.276053	-0.699177	-0.781237	6
CBLL1	-0.368397	-0.430749	0.0587557	0.47357	1.06205	1.02299	0.038328	-0.0978892	-0.189076	-0.404141	6
CBR1	1.68688	1.55864	0.68671	0.672622	-0.63866	-0.519543	-0.5734	-0.565964	-0.821142	-0.759756	49
CBR3	1.9371	1.61495	0.986269	0.682233	-0.580548	-0.798825	-0.440651	-0.755012	-1.08262	-1.05791	7
CBR4	-0.457593	-0.630268	-0.00428001	0.314552	0.71682	0.588241	0.500337	0.538655	-0.294848	-0.28151	8
CBWD2	1.65424	1.51504	-0.191549	-0.145489	-0.344021	-0.629624	-0.702455	-0.41199	0.0883396	-0.128147	1
CBX1	-0.315421	-0.328922	0.635286	0.804583	1.09024	1.05792	-0.0210797	-0.0844455	-0.879765	-0.748466	20
CBX2	-1.52395	-0.735442	0.00433216	-0.186015	0.615556	0.839935	0.511629	0.104538	0.538361	0.535395	1
CBX3	-0.386889	-0.372164	0.786348	0.855482	0.577931	0.55354	-0.177098	-0.183481	-0.538064	-0.677472	51
CBX4	-0.521713	-0.863235	-0.343548	-0.389255	0.431003	0.500567	-0.136245	-0.362914	1.20661	0.987922	10
CBX5	-0.336516	-0.345287	0.341121	0.38454	1.30747	1.25227	0.108016	0.0195141	-0.909771	-0.939852	54
CBX6	-0.365493	-0.474988	-0.768452	-0.679833	0.257007	0.174816	-0.264612	0.0643761	1.11465	1.12686	3
CBX8	-0.85807	-0.623693	-0.720138	-0.6361	1.02496	1.09917	0.14717	0.0356617	0.781923	0.501108	19
CBY1	0.946134	0.844634	-0.332631	-0.343197	-0.204796	-0.156033	0.258056	0.176476	-0.400771	-0.0835324	2
CC2D1A	1.61283	1.556	0.297679	0.229273	-0.385954	-0.493563	-0.129631	-0.317356	-0.664858	-0.752207	29
CC2D1B	1.35174	1.27081	0.514127	0.612147	-0.472442	-0.437405	-0.52511	-0.48431	-0.616276	-0.535705	24
CC2D2A	0.51124	0.376398	-0.574978	-0.359308	-0.201407	-0.339982	0.250697	0.267717	0.592718	0.30324	8
CCAR1	-0.407673	-0.302751	0.791015	0.831559	0.726895	0.760932	-0.43841	-0.395397	-0.380825	-0.436891	56
CCAR2	-0.456783	-0.468172	0.442652	0.467536	0.141884	0.254877	-0.247782	-0.141784	0.454513	0.451597	95
CCDC102A	0.541973	0.456519	0.304663	0.391962	-0.0145442	-0.00253924	-0.186884	-0.142327	-0.385322	-0.0418054	8
CCDC106	-0.46401	-0.397694	-0.21843	-0.444105	0.0622487	0.222192	-0.0629938	0.0269253	0.908648	1.07156	2
CCDC107	-0.0208951	0.0697765	-0.282676	0.0788231	0.35236	0.141128	0.280787	0.143973	-0.113743	0.0548065	2
CCDC115	-0.321322	-0.465138	-0.657228	-0.234084	0.208503	0.121589	0.296972	0.427122	0.276425	0.349617	6
CCDC117	0.472491	0.511471	1.05179	1.18729	-0.192423	-0.213354	-0.7404	-0.700218	-0.636005	-0.510468	5
CCDC12	0.262127	0.164024	0.990911	0.895365	0.465364	0.534827	-0.522257	-0.526099	-0.629015	-0.564838	17
CCDC124	1.24165	1.14759	0.98172	0.975967	-0.556472	-0.609129	-0.934165	-0.935662	-0.250558	-0.219963	30
CCDC127	-0.563444	-0.570151	-1.03406	-0.794351	0.738953	0.782819	1.11311	1.10669	0.133885	0.206908	22
CCDC130	-0.532734	-0.545698	-0.0179066	-0.303316	0.558867	0.75069	0.106525	0.17533	-0.0286075	0.240547	5
CCDC134	-0.479114	-0.481302	-0.250032	0.0335378	0.347237	0.30304	0.488407	0.567706	0.0492703	0.0382672	14
CCDC137	-0.68882	-0.456288	-0.599654	-0.491042	0.911799	1.00109	0.201673	-0.0240192	0.713208	0.663269	12
CCDC138	-0.567728	-0.760838	-0.589305	-0.73214	0.103209	0.33465	0.477233	0.652972	1.08052	0.974834	6
CCDC14	-0.149733	-0.239207	-0.507267	-0.320008	-0.0598095	-0.0478667	0.278848	0.245092	0.712962	0.506382	9
CCDC152	-0.526121	-0.551875	0.859773	0.920642	0.210511	0.175203	0.00623277	-0.196743	-0.00883767	-0.184444	2
CCDC157	0.177668	-0.109831	-0.870945	-0.961327	0.768473	0.535977	-0.183555	-0.0397934	0.441925	0.601922	3
CCDC167	-0.93718	-0.733831	-1.64266	-1.68405	0.844651	0.566676	1.18016	1.27552	0.815348	1.01971	2
CCDC168	1.42533	1.63096	0.29544	0.570508	-1.05769	-0.722344	-0.476711	-0.0929455	-0.523671	-0.344532	2
CCDC170	-2.83894	-2.06457	-0.507977	-0.272734	1.07205	1.29718	1.48189	1.28056	0.586995	0.669868	1
CCDC174	-0.0238063	0.182639	1.19578	1.18002	0.0669064	0.159269	-0.263885	-0.287691	-0.717866	-0.623802	9
CCDC18	1.04739	0.877704	0.381576	0.370655	-0.0120522	-0.0961487	-0.398712	-0.421651	-0.372979	-0.410592	12
CCDC182	0.142205	-0.353453	0.63035	0.455227	-1.05275	-0.379526	-0.531897	-0.215138	0.488636	1.52069	1
CCDC186	1.0634	1.05616	0.67965	0.730821	-0.376136	-0.535744	-0.353682	-0.407	-0.609646	-0.702488	12
CCDC22	1.0576	0.828542	0.270703	0.154273	-0.547165	-0.684807	-0.231025	-0.196751	-0.138739	-0.1037	30
CCDC25	1.90506	1.6877	0.773393	0.600183	-0.369289	-0.612687	-0.528707	-0.890854	-0.964431	-0.978762	17
CCDC28A	0.72841	0.578681	-0.672509	-0.920697	0.0908081	0.151241	0.312801	0.463567	-0.0543958	0.248822	3
CCDC28B	0.340788	0.673922	-0.195082	-0.0181317	0.029113	0.197961	-0.0916112	0.042233	-0.216243	-0.0586103	2
CCDC32	0.860532	0.780972	0.279606	0.399856	-0.260613	-0.199656	-0.148693	-0.186375	-0.468037	-0.353253	1
CCDC43	1.88896	1.86065	0.334635	0.260315	-0.463825	-0.398453	-0.639466	-0.662528	-0.724142	-0.585906	23
CCDC47	-0.624936	-0.830857	-1.39338	-1.23388	0.703714	0.580836	0.91176	1.10217	0.70913	0.688639	52
CCDC50	1.93975	1.76342	0.219837	0.422759	-0.659409	-0.605311	-0.791534	-0.542809	-0.719843	-0.448831	25
CCDC51	-0.152632	-0.252982	-0.745214	-0.729503	0.58497	0.331297	0.75911	0.900449	-0.0891777	0.150439	35
CCDC58	-0.074053	-0.0528578	0.49461	0.484511	0.349943	0.47153	0.0470993	0.338761	-0.755789	-0.592427	19
CCDC59	-1.22972	-0.992198	-0.970001	-0.892213	1.24004	1.31917	0.225815	0.127703	0.949428	0.811053	9
CCDC6	1.68652	1.51101	0.662417	0.629974	-0.399093	-0.338636	-0.618	-0.491569	-0.870941	-0.698794	41
CCDC61	-0.200081	-0.185078	-0.913956	-0.891279	-0.0568494	0.00671329	0.361325	0.529602	1.06738	0.769675	5
CCDC71	0.0470302	-0.256488	-0.107762	-0.326951	1.31578	1.05722	0.12377	-0.270095	-0.367621	-0.510543	1
CCDC77	-0.282545	-0.393689	-0.52196	-0.493975	0.12412	0.204085	0.206594	0.210252	0.91514	0.788816	8
CCDC80	-0.502075	-0.330284	-0.655534	-0.630519	0.362044	-0.111316	1.01447	0.556296	0.621319	0.407913	10
CCDC82	0.0620564	-0.485158	1.20118	1.32978	-0.184857	-0.0941746	-0.417489	-0.0465016	-0.616818	-0.169443	6
CCDC84	-0.275187	-0.306472	-0.335997	-0.222005	-0.0106032	0.0612581	-0.120013	0.103828	1.05814	0.817769	3
CCDC85B	0.399753	0.165306	-0.287626	-0.0943191	0.0019379	0.191523	0.213684	0.143853	-0.0612635	0.0314925	2
CCDC85C	1.83374	1.9372	0.215143	0.377	-1.09736	-0.477229	-0.318209	-0.395411	-0.719466	-0.651071	2
CCDC86	-0.893253	-1.04588	-0.714419	-0.719671	1.2944	1.2035	0.192199	-0.172118	0.750037	0.480735	23
CCDC88A	1.35248	1.24507	-0.102962	-0.128765	-0.378247	-0.444686	-0.0315018	-0.0856281	-0.24912	-0.294563	39
CCDC88C	0.851154	0.692544	-0.115221	-0.0313558	-0.135084	-0.0179333	0.066033	0.139295	-0.207947	-0.358752	23
CCDC9	0.78045	0.794727	-0.654005	-0.411841	-0.284563	-0.185092	-0.259846	-0.267294	0.664355	0.55819	16
CCDC90B	-0.728151	-0.682079	-0.832205	-0.584468	0.579449	0.550483	0.908644	1.01176	0.278437	0.173245	12
CCDC91	1.89716	1.77746	0.621444	0.557353	-0.522133	-0.481607	-0.615013	-0.662931	-0.930608	-0.780937	13
CCDC92	0.520377	0.29307	0.428338	0.623002	0.255047	-0.0969404	-0.234436	-0.166209	-0.372164	-0.545745	1
CCDC93	0.894292	0.820524	0.327269	0.241371	-0.540289	-0.520407	-0.133671	-0.215022	-0.151367	-0.139475	37
CCDC94	-0.027925	0.1349	0.903295	1.09656	-0.0132923	0.0898564	-0.25124	-0.167922	-0.520047	-0.579927	14
CCDC97	-0.273749	0.0372872	0.431418	0.583377	-0.102461	-0.166502	-0.75973	-0.525944	0.268538	0.621868	10
CCDC9B	0.0348749	-0.108326	-0.35422	-0.186459	0.12973	0.195595	-0.294356	-0.0288652	0.595304	0.438699	7
CCL2	0.600241	0.579196	0.287477	0.51319	-0.505047	-0.495042	-0.104044	0.0427111	-0.109707	-0.104635	1
CCM2	0.0620051	-0.124255	-0.273084	-0.302326	-0.121755	-0.155164	0.370502	0.195807	0.711644	0.758273	8
CCNA2	0.550327	0.200343	0.839758	0.98256	-0.242161	-0.167467	-0.397299	-0.382893	-0.532441	-0.439443	13
CCNB1	1.2766	1.00105	0.315809	0.246446	-0.236999	-0.447608	-0.0551823	-0.072561	-0.453418	-0.528377	9
CCNB2	0.890575	0.654029	0.249436	0.347521	-0.328719	-0.249081	-0.0529484	-0.0444433	-0.309241	-0.371905	10
CCNC	-0.770408	-0.897401	0.0356813	0.0360665	0.352883	0.187958	0.116474	-0.120632	1.01433	0.840002	5
CCND3	1.06458	0.481302	0.518317	0.658896	-0.901461	-0.868555	0.412191	-0.267165	-0.0091929	-0.384567	2
CCNDBP1	1.69703	1.56828	-0.10279	0.149183	-0.796442	-1.03096	-0.446964	-0.229204	-0.0832076	-0.0205827	2
CCNE1	-0.0849393	-0.230216	0.813564	0.850472	-0.211659	-0.17809	-0.251108	-0.0231051	-0.333864	-0.272443	5
CCNE2	-0.34737	-0.251569	0.787979	0.752131	0.015609	0.165722	-0.148897	-0.0285358	-0.376777	-0.170917	5
CCNF	-0.346114	-0.583735	0.212381	-0.0378656	0.352568	0.0896629	0.347805	0.327318	0.131617	0.210702	2
CCNH	-0.396816	-0.203918	1.2174	1.20369	-0.129476	-0.0503423	-0.124443	-0.0348122	-0.0930071	-0.0954264	17
CCNK	-0.800368	-0.820899	0.88133	0.772317	0.507894	0.592503	-0.279867	-0.307872	0.15063	0.108507	14
CCNL1	-1.13886	-1.46618	0.985411	1.19607	1.13955	1.1475	-0.136326	-0.226456	-0.461216	-0.33846	5
CCNL2	-1.09609	-0.762826	1.31767	1.24238	0.746501	0.561457	-0.189023	-0.176198	-0.619805	-0.453009	6
CCNT1	-0.909266	-0.795935	0.879396	0.929074	0.0311523	0.176192	-0.216981	-0.134306	0.365551	0.404533	20
CCNT2	-0.0566683	-0.0635699	0.579826	0.884434	0.0731894	0.334172	-0.355795	-0.55781	0.0302378	-0.00330513	7
CCNY	-0.512149	-0.464182	-1.23133	-0.770642	-0.0506207	0.0510062	0.771367	0.798923	0.909939	1.06247	5
CCNYL1	-0.457371	-0.334788	-0.755896	-0.710454	-0.00850797	0.119967	0.524781	0.67484	0.732357	0.921468	11
CCP110	0.426226	0.42425	-0.060474	0.0187836	-0.194383	-0.265702	0.00670212	0.0614546	0.171974	0.0887636	12
CCPG1	-0.790436	-0.705877	-1.42663	-1.40726	0.642174	0.567851	1.12723	1.22733	0.684518	0.833798	29
CCS	1.78028	1.66844	0.528085	0.52177	-0.477836	-0.549618	-0.546865	-0.559162	-0.824293	-0.857604	10
CCT2	0.888466	0.771131	0.219306	0.176485	-0.641896	-0.697682	-0.542708	-0.432932	0.574778	0.535648	194
CCT3	0.774964	0.661422	0.169915	0.127161	-0.657752	-0.705787	-0.457154	-0.405095	0.533803	0.526753	179
CCT4	0.740301	0.589145	0.242279	0.168932	-0.532501	-0.590814	-0.460962	-0.367417	0.491786	0.434473	174
CCT5	0.954788	0.890145	0.297635	0.254568	-0.670418	-0.734177	-0.619194	-0.544182	0.504344	0.452556	232
CCT6A	0.912025	0.750667	0.276881	0.242595	-0.667435	-0.764418	-0.54574	-0.497133	0.640666	0.531146	132
CCT7	0.749178	0.619751	0.182107	0.114202	-0.59044	-0.629723	-0.477362	-0.364398	0.592482	0.566156	179
CCT8	0.956006	0.836306	0.309116	0.273391	-0.69713	-0.772905	-0.587846	-0.498396	0.601517	0.583853	263
CD109	-0.601541	-0.645341	-0.694806	-0.602252	0.167155	0.0215741	0.669711	0.798523	0.845843	0.799592	81
CD14	-0.0554537	0.268728	-0.300413	-0.364885	-0.572698	0.531489	-0.255607	-0.526261	2.4219	-0.442461	2
CD151	-0.805527	-0.428797	-1.27971	-1.36199	0.326923	0.107031	0.867929	1.07769	1.26962	1.24356	9
CD276	-0.132109	-0.0116556	-0.769924	-0.738791	-0.0670597	-0.0992125	0.721779	0.716279	0.557668	0.74506	17
CD2AP	1.56066	1.43176	0.690362	0.732293	-0.574185	-0.633669	-0.525118	-0.450576	-0.761463	-0.731785	41
CD2BP2	-0.363333	-0.160927	0.228886	0.17903	0.123482	0.306133	-0.402288	-0.444745	0.770513	0.823841	26
CD320	-1.00109	-1.05465	-0.85736	-0.64854	0.322016	0.364099	0.606557	0.712569	0.968249	0.926269	7
CD3EAP	-0.236546	-0.28683	-0.426407	-0.402199	0.680495	0.64159	-0.107109	-0.131569	0.652877	0.552379	20
CD40LG	0.662582	0.841087	-0.480247	-0.629176	0.3738	-0.140873	0.265051	0.0260583	-0.130292	-0.0836517	1
CD44	-0.588239	-0.634572	-1.14608	-0.894997	0.32176	0.241037	0.846463	1.00196	0.835404	0.883871	80
CD46	-0.972967	-1.19518	-1.44226	-1.20588	0.280873	0.273736	1.09002	1.33777	1.15236	1.25843	18
CD47	-0.701664	-0.801041	-1.16156	-1.29314	0.391783	0.332035	1.02965	1.10743	0.882339	1.00162	12
CD55	-0.423227	-0.49529	-0.838582	-0.81984	0.0527892	0.0150532	0.717228	0.745392	0.92171	0.883724	67
CD58	-1.03646	-1.12555	-1.36058	-1.79362	0.298201	0.387753	1.45654	1.73088	1.6562	1.55187	9
CD63	-1.4342	-1.64077	-1.47288	-1.87956	0.337437	0.078861	1.39082	1.33331	1.93871	1.8941	18
CD70	-0.552656	-0.323769	-0.891359	-0.894934	0.248107	0.275922	0.867869	0.881544	0.417875	0.675741	3
CD74	0.292645	-0.025757	-0.588133	0.249059	-0.37095	0.67609	0.266585	0.508952	-0.42814	0.164625	10
CD81	-0.267851	-0.443648	-1.62484	-1.06813	0.227622	0.162397	0.615686	0.796805	1.09043	1.30622	20
CD82	-0.214823	-0.405367	-1.2486	-1.27521	-0.0255507	0.0536625	0.88932	1.0623	1.18638	1.13743	8
CD83	-0.980138	-0.776835	-0.862718	-0.597801	0.251735	0.167332	1.11858	0.69565	1.10993	0.739293	8
CD9	-0.511516	-0.38219	-1.37991	-1.29599	0.102583	0.0540153	0.671222	0.787793	1.27414	1.14904	32
CD99	-0.520757	-0.47099	-0.930759	-0.793348	0.0431329	0.0255664	0.578445	0.840245	0.806265	0.872788	23
CD99L2	-0.51831	-0.658505	-1.18537	-1.36482	0.285525	0.244608	0.844985	1.05937	1.01395	1.0215	7
CDA	1.82808	1.82638	1.0327	1.03837	-0.251287	-0.674727	-0.833943	-0.726631	-0.770484	-0.827161	10
CDAN1	1.88031	2.05953	0.235785	0.305077	-0.543557	-0.582682	-0.512717	-0.370115	-0.671843	-0.615915	5
CDC123	1.82201	1.69391	0.341663	0.208358	-0.568717	-0.505965	-0.501497	-0.434145	-0.805025	-0.748763	12
CDC14B	2.3985	2.21325	0.756815	0.930578	-0.870058	-0.741235	-0.921493	-0.925523	-0.972022	-1.16447	1
CDC16	0.289703	0.198961	-0.0881939	-0.22184	0.0120698	0.0245282	-0.268892	-0.331075	0.62551	0.489365	32
CDC20	0.360665	0.342012	0.401804	0.516571	0.0989927	-0.159478	-0.084948	-0.18247	-0.281942	-0.331416	5
CDC23	0.0126053	0.0525861	-0.0236051	-0.113754	0.120752	0.100349	-0.310322	-0.36832	0.638183	0.475331	35
CDC25B	0.480002	0.510659	0.384657	0.432145	-0.243678	-0.316764	0.0481471	0.0618432	-0.338859	-0.313814	2
CDC25C	1.80695	1.67363	0.151717	-0.0294359	-0.440322	-0.344985	-0.523833	-0.452022	-0.541973	-0.683601	6
CDC26	0.522104	0.467264	-0.342236	-0.110565	-0.0978774	0.0630392	-0.417649	-0.706161	0.603056	0.465489	6
CDC27	-0.0474784	-0.139256	-0.15772	-0.316711	0.219372	0.140124	-0.0649702	-0.240839	0.71759	0.53202	42
CDC34	1.40624	1.22772	0.513369	0.164357	-0.464295	-0.517593	-0.0876661	-0.338746	-0.243001	-0.525886	4
CDC37	1.33982	1.2181	0.625392	0.686754	-0.515293	-0.224306	-0.618899	-0.307069	-0.561198	-0.547725	61
CDC37L1	1.91349	1.81847	0.180771	0.0865502	-0.535061	-0.76277	-0.547391	-0.719135	-0.781652	-0.868841	9
CDC40	-0.312661	-0.415602	-0.608089	-0.492526	0.859797	0.802874	0.0109136	-0.052746	0.519223	0.402504	40
CDC42	0.920111	0.978849	-0.341526	-0.37164	-0.471888	-0.216876	0.080745	0.153457	0.261634	0.164512	50
CDC42BPA	-0.203988	-0.182398	-0.202299	-0.207806	0.0234276	-0.0448186	0.325402	0.406118	0.409797	0.40153	59
CDC42BPB	0.363087	0.310289	0.0912578	0.0319225	-0.273239	-0.299596	0.0856797	0.239104	0.119104	0.138797	83
CDC42BPG	0.363662	0.457167	0.150678	-0.326336	0.00885898	0.129966	-0.0239338	-0.0308417	-0.0299825	0.00510278	1
CDC42EP1	-0.376521	-0.241812	-0.178379	-0.159361	-0.0173599	0.0879856	0.408915	0.421114	0.422133	0.532781	17
CDC42EP2	0.888588	0.919548	-0.109596	0.198601	-0.294624	-0.124019	-0.303317	-0.11447	-0.311891	-0.129223	3
CDC42EP3	0.456047	0.361992	-0.0756625	0.115068	0.105784	0.0353529	0.136071	0.0538103	-0.0585973	-0.160581	3
CDC42EP4	1.51076	1.43951	0.295925	0.459121	-0.420335	-0.620221	-0.625044	-0.426978	-0.804709	-0.67108	8
CDC42SE1	-1.13163	-1.03224	-1.4523	-1.33804	0.000477296	0.169513	1.18328	1.22013	1.51134	1.57381	1
CDC42SE2	-2.67372	-2.797	-3.41501	-2.66488	1.25964	1.42102	2.31175	2.32213	2.50612	2.46648	3
CDC45	0.0911619	0.157407	0.854754	0.748903	-0.374821	-0.382094	0.0320484	-0.0873418	-0.273144	-0.204638	22
CDC5L	-0.436014	-0.516714	-0.612238	-0.521336	0.891851	0.912205	-0.0185256	-0.090547	0.804921	0.602792	82
CDC6	-0.570695	-0.307608	-0.434597	-0.37578	0.0584434	0.417046	0.327786	0.301432	0.647488	0.451115	3
CDC7	-0.728121	-0.478577	0.352989	0.409757	-0.0959997	-0.0540605	0.170464	0.196226	0.378022	0.572173	7
CDC73	-0.716651	-0.717029	1.2254	1.28487	0.541863	0.539108	-0.364527	-0.347856	-0.286607	-0.238297	51
CDCA2	-0.450141	-0.518691	-0.622882	-0.582706	1.17922	1.04126	0.168083	0.16326	0.105325	0.0798444	24
CDCA3	-0.283927	-0.185831	-0.0766892	-0.172615	0.147138	0.0717849	0.482621	0.452126	0.394002	0.460896	4
CDCA5	1.00956	0.932853	-0.408498	-0.284754	0.801234	0.968424	-0.257282	-0.404938	-0.929372	-0.833554	4
CDCA7	-0.239664	-0.140692	0.0932799	0.24951	0.697639	0.636727	-0.263232	0.0942184	-0.199625	-0.223822	1
CDCA7L	-0.278174	-0.342498	-0.807236	-0.939869	1.68317	1.47588	0.62992	0.357564	-0.56204	-0.428785	13
CDCA8	-0.720776	-0.36377	-0.822409	-0.733141	0.900812	0.855537	0.366756	0.205857	0.233741	0.241392	16
CDCP1	-0.392846	-0.409328	-1.2603	-1.263	-0.0182831	-0.0410498	0.910699	0.920987	1.14361	1.1543	27
CDH11	-0.202995	0.0442352	-0.567469	-0.424793	0.0934396	0.163953	0.493834	0.609552	0.231578	0.263005	2
CDH13	-0.640959	-0.586771	-0.687437	-0.682734	0.187168	0.119186	0.760651	0.876538	0.805905	0.82722	29
CDH2	-0.263076	-0.449979	-0.648211	-0.652112	0.235151	0.155546	0.604082	0.819045	0.408363	0.467358	54
CDH6	-0.384289	-0.472078	-0.665735	-0.848404	0.346787	0.223215	0.889557	1.26287	0.891444	0.567924	3
CDHR3	1.86452	1.7336	-0.243929	-0.266266	-0.956371	-0.764591	-0.545913	-0.444675	0.279674	0.0482821	2
CDIPT	-1.33467	-1.4139	-0.787937	-1.32562	0.704038	0.766135	0.899331	1.28982	0.510045	0.676966	5
CDK1	1.29975	1.19308	0.606069	0.510869	-0.568638	-0.59113	-0.412708	-0.40953	-0.605464	-0.548297	40
CDK10	-0.109483	-0.261999	0.268641	0.172172	1.04317	0.826354	-0.0298014	-0.112695	-0.495979	-0.672901	3
CDK11A	-0.417628	-0.345627	0.680744	0.566256	0.118913	0.0484945	-0.00250005	-0.0330668	0.169873	-0.0811192	2
CDK11B	-0.97807	-1.086	0.95343	1.16459	0.611858	0.583692	-0.139136	0.0274219	0.0191078	-0.21345	4
CDK12	-0.604344	-0.826721	0.865383	0.931343	0.600188	0.571237	-0.332309	-0.268593	-0.0790171	-0.190112	30
CDK13	-0.319094	-0.466265	0.488229	0.636744	0.134537	0.17368	-0.330175	-0.413054	0.671221	0.423367	34
CDK14	1.82547	1.69406	-0.255874	-0.857919	-0.740345	-0.337823	-0.455103	0.084178	0.106281	-0.358588	1
CDK16	1.23274	1.00063	0.109718	0.21769	-0.365341	-0.465461	-0.222198	-0.0937199	-0.298926	-0.203573	9
CDK17	0.603821	0.302036	-0.53422	-0.596268	-0.357208	-0.45182	0.381247	0.53877	0.404327	0.583119	4
CDK19	-0.316643	-0.424192	0.268981	0.263017	0.0537014	-0.0421096	-0.0679776	-0.13285	0.940076	0.741721	5
CDK2	1.0838	0.897965	0.52477	0.439136	-0.394898	-0.487333	-0.233346	-0.222508	-0.394547	-0.457287	36
CDK2AP1	-0.134693	0.088759	-0.167269	0.32306	1.24413	0.751189	-0.48174	-0.473635	-0.0337308	-0.411731	1
CDK4	1.38871	1.26941	0.348897	0.254371	-0.476745	-0.562068	-0.28574	-0.39783	-0.395829	-0.353599	24
CDK5	1.44598	1.20399	0.542482	0.312957	-0.627667	-0.585141	-0.277008	-0.12957	-0.491056	-0.374163	17
CDK5RAP1	-0.989689	-1.01027	0.0475882	0.218587	0.687792	0.74688	0.763842	0.833931	-0.182793	-0.0933705	18
CDK5RAP2	0.162342	0.185155	-0.200506	-0.269266	-0.163211	-0.17385	0.183611	0.228257	0.416636	0.322055	78
CDK5RAP3	-0.74763	-0.702256	-0.660135	-0.586356	0.485192	0.472836	0.728636	0.807095	0.46602	0.473661	29
CDK6	1.17324	1.00862	0.372223	0.384539	-0.277003	-0.304263	-0.22026	-0.254376	-0.702372	-0.391411	20
CDK7	-0.359693	-0.564147	1.3758	1.30533	-0.147535	-0.0705153	-0.24667	-0.18775	-0.266183	-0.200416	12
CDK8	-0.65156	-0.462812	0.313034	0.20254	0.500917	0.217273	0.0554489	-0.111007	0.457799	0.500872	5
CDK9	-0.508636	-0.383066	0.824567	0.771685	-0.0434244	0.149833	-0.264477	-0.0128824	-0.0137099	0.179708	14
CDKAL1	-0.416889	-0.40016	-0.741371	-0.755467	0.504213	0.452689	0.748524	0.808783	0.401001	0.4782	25
CDKL5	-0.0999925	0.0661061	-0.329005	-0.308004	0.014472	0.0131787	0.160153	0.109744	0.564924	0.210591	12
CDKN1A	-0.174145	-0.410068	0.94882	0.898431	0.150715	-0.0512208	-0.105636	-0.283358	-0.144362	-0.0203227	3
CDKN1B	-1.08909	-0.741844	1.93144	1.84886	0.0830385	-0.00237754	-0.088323	-0.251094	-0.625604	-0.43439	7
CDKN1C	-0.00206822	-0.183576	1.13866	1.37474	0.0441233	0.0204637	-0.281774	-0.199196	-0.326783	-0.684356	5
CDKN2A	2.44657	2.33629	0.432987	0.229117	-0.624719	-0.673951	-0.379471	-0.418453	-1.37266	-1.2806	3
CDKN2AIP	-1.0762	-1.13351	0.886439	0.880054	0.172085	0.328684	0.00409041	0.0597563	0.265692	0.191656	34
CDKN2AIPNL	0.476638	0.533737	0.627647	0.764643	0.257982	0.0472922	-0.460856	-0.765319	-0.191421	-0.0837109	4
CDKN2C	2.12112	1.93232	0.167235	0.0849331	-0.425478	-0.413264	-0.591313	-0.820872	-0.670888	-0.688842	6
CDO1	1.33089	1.02572	0.401588	0.148252	-1.10182	-0.860019	-0.711348	-0.653723	0.515246	0.148024	3
CDON	-0.494779	-0.581881	-0.806279	-0.64553	-0.0476597	-0.0156624	0.674212	0.695942	1.20168	0.885214	3
CDPF1	0.368914	0.368884	0.979698	0.995549	-0.168239	-0.13236	-0.494448	-0.553761	-0.37501	-0.284887	1
CDR2	1.19592	0.904641	0.412386	0.379372	-0.292457	-0.0991009	-0.0986602	-0.288378	-0.658374	-0.518228	5
CDR2L	1.80797	1.7282	0.200984	0.295929	-0.475787	-0.364871	-0.44305	-0.434588	-0.523447	-0.813079	11
CDS2	0.581074	0.487407	-0.443932	-0.630441	-0.120573	0.222753	0.352574	0.326955	-0.0108416	0.075451	7
CDT1	0.129022	0.0623149	0.659634	0.658978	-0.0901903	0.0993054	0.00590766	-0.0195833	-0.488488	-0.00543886	8
CDV3	2.34986	2.11034	0.816293	0.754303	-0.386333	-0.577838	-0.90115	-1.01842	-0.990095	-1.16541	23
CDX2	-0.117907	-0.0337223	-0.62078	-0.70999	0.186642	0.275128	0.15186	0.0595415	0.782895	0.730673	1
CDYL	-1.04242	-1.20054	0.39777	0.473688	0.876666	0.961129	0.0824447	-0.163726	0.30224	0.155081	17
CDYL2	0.478925	0.278365	-0.0382556	-0.0755145	0.763859	0.623824	-0.25619	-0.417246	-0.437251	-0.460809	3
CEBPB	-0.702735	-0.89898	-0.519763	-0.426073	1.42828	1.50062	0.364428	0.219943	-0.181065	-0.174443	11
CEBPG	-0.0475108	0.0640769	-0.011599	0.323633	0.719634	0.625356	0.278661	-0.0319748	-0.366927	-0.163125	4
CEBPZ	-0.826168	-0.684798	-0.958962	-0.872292	1.68397	1.57029	0.50621	0.227926	-0.05232	-0.0674259	66
CEBPZOS	-1.17203	-1.46584	-0.620861	-0.441818	0.834349	0.870337	1.01183	0.970344	0.412996	0.400123	3
CELF1	-0.833274	-0.843601	-0.165115	-0.279343	0.925291	0.883639	0.23638	0.162249	0.404529	0.268989	36
CELF2	-0.317493	-0.455772	-0.434564	-0.332057	0.760257	0.802659	0.187186	0.199226	0.124821	0.200051	10
CELSR1	-0.526966	-0.519209	-0.93754	-0.776629	0.341395	0.306627	0.731135	0.914333	0.530459	0.766349	20
CELSR2	0.0140368	0.148196	-0.41337	-0.279578	0.0365044	-0.0704544	0.440435	0.48784	0.317565	0.344132	27
CELSR3	-0.132101	-0.0620229	-0.7738	-0.700473	0.209981	0.220758	0.601087	0.591277	0.287442	0.366574	10
CENPB	-0.781331	-0.254623	-0.676716	-0.505664	1.45907	1.52081	0.548929	0.505572	-0.457741	-0.439522	11
CENPC	-0.520827	-0.577592	-0.832471	-0.74956	1.74411	1.68289	0.501902	0.267507	-0.457302	-0.529919	22
CENPE	0.0165027	0.0883802	0.271435	0.174754	-0.114552	-0.0348335	0.299211	0.234193	-0.0738314	-0.0125632	36
CENPF	-0.398514	-0.439097	0.256789	0.267715	0.780161	0.75729	0.200238	0.149511	-0.444342	-0.378195	159
CENPH	0.363317	0.166915	0.389321	0.381684	0.591174	0.595089	-0.11919	-0.143133	-0.746973	-0.759956	17
CENPI	-0.221116	-0.198864	-0.205656	-0.123575	1.09183	0.913182	0.246119	-0.0417745	-0.350618	-0.360186	6
CENPK	0.243496	0.32103	0.583808	0.565167	0.734971	0.627695	-0.187644	-0.204322	-0.85806	-0.807949	7
CENPL	0.472411	0.517224	-0.494574	-0.289529	1.16247	1.17009	0.216983	0.00127024	-0.898881	-0.941675	4
CENPM	1.01118	0.991467	-0.716086	-0.426631	0.425073	0.48568	0.0719436	-0.137793	-0.482827	-0.585716	4
CENPN	-0.683945	-0.403759	-0.929581	-0.483243	1.36154	1.24696	0.439139	0.23539	-0.385253	-0.427363	11
CENPO	-0.792053	-0.58188	0.336551	0.586136	0.702669	0.728211	0.13364	0.266251	-0.443597	-0.231588	1
CENPP	-0.548367	-0.111172	-0.407089	-0.430134	1.30618	1.44701	-0.128802	0.0861779	-0.554906	0.0454446	2
CENPQ	-0.536065	-0.447838	-0.906071	-0.899757	1.31918	1.225	0.500041	0.189823	0.187722	0.142427	4
CENPT	-0.565949	-0.288327	-0.760379	-1.00386	1.37214	1.25675	0.516484	0.242794	-0.130706	-0.0199587	10
CENPU	0.188903	-0.056797	-0.65273	-0.742084	0.868362	0.945565	0.00967174	0.053644	0.222651	-0.115141	5
CENPV	-0.606714	-0.731391	-0.651326	-0.587099	1.24041	1.22306	0.2788	0.0492882	0.329105	0.272952	7
CENPW	-0.0861945	0.290019	-1.07286	-0.813696	1.45204	1.41448	0.493488	0.201693	-0.606645	-0.56799	1
CENPX	0.212659	0.216878	-0.0309757	0.224017	0.494481	0.507951	-0.0225018	-0.220238	-0.239604	-0.438326	1
CEP104	-0.641323	-0.373665	0.656987	0.482874	0.727001	0.669836	-0.0242311	-0.197465	-0.301403	-0.29427	2
CEP112	1.07536	1.139	-0.342495	-0.0086735	-0.355265	-0.248731	0.140697	0.0141783	-0.278309	-0.431426	2
CEP120	-0.212567	-0.240261	-0.355637	-0.0240902	0.345341	0.147663	0.545837	0.501021	-0.226954	-0.108796	7
CEP128	0.0587288	-0.163664	-0.382009	-0.305288	0.494539	0.343708	0.388776	0.503855	-0.477313	-0.255545	14
CEP131	-0.461829	-0.47156	-0.267346	-0.204209	-0.143159	-0.0976132	0.241719	0.315842	0.985417	0.925376	65
CEP135	0.35402	0.399432	0.184768	0.0352856	0.262771	0.112883	0.173733	0.180063	-0.567694	-0.573444	13
CEP152	0.400611	0.272099	-0.0765709	-0.126684	0.403726	0.296779	0.393879	0.473434	-0.758308	-0.560198	20
CEP162	0.375602	0.445032	0.395075	0.42941	-0.0729184	0.178154	-0.226968	-0.0374001	-0.398891	-0.125927	6
CEP164	-0.0353681	0.220605	-0.484259	-0.396141	0.244116	0.299187	0.446787	0.353258	0.137595	0.349889	3
CEP170	0.843662	0.706636	0.639005	0.64015	-0.262383	-0.338139	-0.451608	-0.457853	-0.11766	-0.261292	49
CEP170B	1.02224	0.792564	0.358269	0.435241	-0.263264	-0.24136	-0.40332	-0.612862	-0.242952	-0.411013	7
CEP192	0.691957	0.680558	-0.0526412	-0.0287722	0.0279094	0.092834	0.0746637	0.0779464	-0.491127	-0.444128	10
CEP250	0.490254	0.474356	0.0456702	-0.0387111	0.123806	0.0461271	0.102964	0.113696	-0.444966	-0.436261	30
CEP290	0.0607817	0.0769355	-0.0526895	-0.0425187	-0.0833821	-0.0102337	-0.0266367	0.127082	0.317516	0.327798	30
CEP295	0.418356	0.170363	-0.267511	-0.2156	-0.0843166	-0.00995704	0.198205	0.179166	0.266331	0.216489	14
CEP350	0.191804	0.138965	-0.0661459	-0.0983182	-0.0542416	-0.0303416	0.0914387	0.189244	0.207369	0.249408	33
CEP41	1.64364	1.29026	-0.605925	-0.979558	0.443312	0.444108	-0.294602	-0.379969	-0.619544	-0.325135	3
CEP44	1.58253	1.26278	-0.0102175	-0.0363662	-0.484287	-0.492519	-0.119452	-0.0262795	-0.562519	-0.50527	12
CEP55	0.609733	0.483755	-0.283254	-0.122664	0.375613	0.403888	0.624493	0.449291	-0.902579	-0.620292	14
CEP57	-0.0581615	-0.0942951	-0.784606	-0.74239	0.400249	0.267043	0.740732	0.649263	0.127567	0.192573	9
CEP63	-0.0968814	-0.205114	-0.133857	-0.133613	0.454185	0.422929	0.395851	0.584601	-0.265594	0.129483	6
CEP68	-0.127609	-0.25667	-0.136731	-0.209979	0.107195	-0.0640073	-0.0198099	0.248736	0.611925	0.551291	1
CEP72	-0.298569	-0.334317	-0.0438944	-0.00982004	0.00609575	-0.00864421	0.144672	0.200426	0.56249	0.461942	20
CEP76	0.876479	0.79738	0.630191	0.676527	-0.0840258	-0.331936	-0.248167	-0.189912	-0.538532	-0.608909	4
CEP78	0.83148	0.793724	-0.599513	-0.480219	-0.170195	-0.169927	-0.0472653	0.0518123	0.228262	0.338141	13
CEP83	0.676803	0.46557	0.453037	0.45811	-0.0994941	-0.113997	-0.164121	-0.129238	-0.426773	-0.481453	9
CEP85	1.81524	1.6443	0.504246	0.21586	-0.363235	-0.532956	-0.455009	-0.432947	-0.762129	-0.793883	11
CEP89	-0.323973	-0.233296	-0.130159	-0.21505	0.51557	0.422526	0.220567	0.336658	0.0953901	0.0161056	1
CEP95	0.600619	0.408646	-0.237903	-0.244816	-0.0849935	0.00648519	0.294513	0.262984	-0.381538	0.0803447	2
CEP97	1.43291	1.25895	-0.198891	-0.110283	-0.467354	-0.568778	-0.10384	-0.13031	-0.22326	-0.29745	19
CEPT1	0.660072	0.91016	-1.03969	-1.61889	0.258921	0.322938	0.328333	0.521677	0.186079	0.174749	2
CERCAM	-0.477391	-0.20836	0.606554	0.789091	-0.150659	0.0921378	0.107538	0.427422	-0.237836	-0.233091	3
CERK	-0.17975	-0.124015	-1.00898	-0.809878	0.0765423	-0.178612	0.516607	0.523189	0.667811	0.544282	8
CERS2	-0.7151	-0.819434	-1.07464	-1.21199	0.838359	0.771959	0.715439	0.698807	0.639923	0.65005	16
CERS6	-0.770837	-0.643195	-0.737681	-1.02833	0.54289	0.550731	0.82661	0.847486	0.579486	0.442532	5
CES1	-0.568931	0.0932229	-0.183925	-0.0679387	-0.458876	0.580192	-0.0352377	-0.000922586	0.888209	0.954425	4
CES2	-0.501231	-0.375476	0.613189	1.00618	-0.756223	-0.405709	0.156922	0.420727	0.0696843	0.476279	1
CES3	0.128401	0.209328	0.734223	0.980981	0.319113	-0.237417	-0.0543179	0.202324	-0.722687	-0.855608	1
CETN2	0.341443	0.16011	-0.0770351	-0.0263787	0.688451	0.595551	-0.212615	-0.320694	-0.144899	-0.351637	13
CETN3	0.163992	0.136578	-0.0169626	0.0620635	-0.0951592	-0.0234082	0.149817	0.130611	0.141986	0.146666	16
CFAP20	0.656067	0.731437	0.298715	0.451742	0.11714	0.213012	-0.443746	-0.455806	-0.406371	-0.389814	12
CFAP36	1.95254	2.00877	0.435138	0.466059	-0.43932	-0.636258	-0.64932	-0.729738	-0.997934	-0.81919	12
CFAP46	-0.350005	-0.99111	0.749492	0.558702	0.70488	0.633608	0.0426696	-0.097509	-0.233886	-0.312502	1
CFAP97	0.964748	0.740561	-0.159314	-0.210822	-0.194335	-0.568875	-0.11888	-0.128329	0.261163	0.118424	2
CFD	0.488931	0.415502	0.841896	0.644272	0.378987	0.0293141	-0.0572016	-0.785365	-0.710939	-0.541056	1
CFDP1	0.355878	0.48019	2.10357	2.10809	-0.0023731	0.0674585	-0.850745	-0.753926	-0.992675	-1.5383	17
CFH	-0.491703	-0.377203	0.0204069	0.101041	0.0921157	0.084711	0.435725	0.345216	0.267793	0.23278	27
CFL1	1.8821	1.90297	0.68852	0.734268	-0.71951	-0.596505	-0.735311	-0.672798	-0.914777	-0.935011	137
CFL2	1.3872	1.21592	0.382316	0.353451	-0.412021	-0.397145	-0.392318	-0.424034	-0.49687	-0.43096	26
CGA	0.0795972	0.509995	0.134172	0.732598	-0.357696	-0.249477	-0.0923848	0.21124	-0.270402	0.00669815	2
CGAS	-0.446594	-0.579008	-1.11471	-0.97632	0.895196	0.819339	0.477819	0.289554	0.783985	0.619648	23
CGGBP1	-0.722697	-0.620461	1.20446	1.36652	-0.023396	-0.248467	-0.366142	-0.368754	0.144419	0.182299	17
CGN	0.815259	1.04412	0.0606523	0.0363697	-0.269092	0.0443002	-0.105005	0.0599799	-0.65996	-0.322281	2
CGREF1	0.107194	-0.0208476	0.256723	0.335932	0.119965	-0.178229	0.266752	0.208684	0.34889	0.247616	12
CGRRF1	-0.605163	-0.589349	-0.498677	-0.353047	1.03028	0.979206	0.23409	0.249222	0.193825	0.256313	3
CHAC2	1.75892	1.95427	0.336807	0.345297	-0.57067	-0.517078	-0.25487	-0.646702	-0.921308	-0.983243	5
CHAF1A	-0.948758	-0.948883	-0.271088	-0.12462	1.05738	1.1809	0.330186	0.184245	0.172638	0.192381	27
CHAF1B	-0.413392	-0.593355	0.287617	0.292613	0.768374	0.687823	-0.0882232	-0.218561	-0.0906144	-0.166469	25
CHAMP1	-0.698154	-0.745476	0.467207	0.645384	1.22097	1.25903	0.0951244	-0.0318057	-0.728354	-0.565503	50
CHCHD1	-0.758801	-1.20849	-0.406446	-0.326946	1.05133	0.920317	0.49944	0.44791	-0.444536	-0.0535465	3
CHCHD2	-0.657364	-1.06765	0.57399	0.558491	0.731618	0.784391	0.677055	0.91502	-0.691969	-0.556884	3
CHCHD3	-0.729092	-0.760204	-0.995982	-0.831665	0.895351	0.818673	1.10104	1.14383	-0.0848007	0.136227	67
CHCHD4	-0.363141	-0.384637	-0.156388	-0.136906	0.833336	0.73833	0.863108	1.05897	-0.56592	-0.438147	14
CHCHD5	-1.63913	-1.54693	0.859658	1.25432	1.05808	1.25568	0.794487	0.816503	-1.06695	-1.08137	2
CHCHD6	-0.4819	-0.796665	-1.32727	-1.35148	0.977956	0.886257	1.20324	1.2683	0.441622	0.560073	3
CHCHD7	-0.370124	-0.205695	-0.0293703	0.0421082	0.458124	0.553384	0.127263	0.391268	-0.359378	-0.266541	4
CHD1	-0.488198	-0.531003	-0.531733	-0.546595	0.954851	0.950767	0.583465	0.589579	-0.211309	-0.0833473	56
CHD1L	-0.279261	-0.199259	0.275557	0.33438	-0.114914	-0.216324	0.221901	0.273933	0.154407	0.166574	31
CHD2	-0.484538	-0.405409	-0.709209	-0.587251	1.3069	1.24049	0.414847	0.205288	-0.36556	-0.280483	37
CHD3	-0.752157	-0.567195	-0.358903	-0.481502	0.57363	0.600833	-0.0489049	-0.0699915	1.08946	0.869084	70
CHD4	-0.656877	-0.603334	0.355893	0.36993	0.758079	0.73156	-0.0426771	-0.061803	-0.0531053	0.00341213	124
CHD6	-0.0648232	-0.0641934	-0.482474	-0.469961	0.186862	0.339873	-0.135384	-0.124384	1.12919	1.08786	19
CHD7	-0.166262	-0.00641099	-0.593765	-0.564158	0.677098	0.678907	0.180763	0.120128	0.343695	0.346793	30
CHD8	-0.394316	-0.384407	0.850999	0.937624	0.0484319	0.0134432	-0.121309	-0.0945322	-0.0959327	-0.0574252	52
CHD9	-0.345604	-0.269248	0.523422	0.590838	0.157493	0.133449	-0.128933	-0.0335827	-0.00955792	0.0107638	25
CHDH	0.013247	0.27179	-0.553443	-0.269778	0.188837	0.569334	0.420121	0.604709	-0.206293	-0.161237	7
CHEK1	0.758552	0.715157	0.247077	0.102345	-0.284902	-0.385427	0.153923	0.101963	-0.225872	-0.30214	15
CHEK2	-0.147747	-0.429986	0.501977	0.34239	-0.267661	-0.252118	0.306115	0.304635	0.164456	0.0181649	20
CHERP	-0.465251	-0.58237	-0.100329	-0.0564692	0.987232	0.925395	-0.00513128	-0.0956957	0.26848	0.202909	37
CHFR	-0.29051	-0.179401	0.932935	0.611999	-0.0760315	-0.0978021	-0.52034	-0.357157	0.0715688	-0.261708	3
CHIC1	0.905765	1.31409	0.203717	0.610821	-0.511759	-0.428846	-0.78202	-0.369675	-0.219944	-0.0178045	1
CHID1	-0.549012	-0.752058	0.408673	0.603035	0.275294	0.224747	0.198413	0.271329	-0.0700194	-0.0699674	18
CHKA	1.37997	1.32943	0.501881	0.44781	-0.385144	-0.570617	-0.252394	-0.250345	-0.607217	-0.525067	6
CHKB	0.401527	0.535326	0.00336621	0.498197	0.0603559	-0.0168838	-0.557484	-0.209302	0.189943	0.0171381	3
CHL1	-0.561567	-0.370067	-1.08172	-0.796754	0.11857	0.102159	0.75248	0.901474	0.77007	0.908562	11
CHM	1.7281	1.2904	0.414104	0.438532	-0.613724	-0.661394	-0.443655	-0.358393	-0.476369	-0.703272	6
CHML	1.76379	1.67965	0.367118	0.177271	-0.503325	-0.516114	-0.411648	-0.531964	-0.76566	-0.624261	13
CHMP1A	1.45773	1.23815	0.556589	0.387396	-0.323676	-0.451224	-0.0981529	-0.383413	-0.496735	-0.529547	7
CHMP1B	1.5002	1.33423	0.634904	0.792509	-0.528725	-0.581564	-0.589315	-0.407988	-0.761729	-0.933762	10
CHMP2A	1.13704	1.14361	0.664283	0.685774	-0.405689	-0.43823	-0.46108	-0.28138	-0.63828	-0.576822	29
CHMP2B	2.36262	2.34808	0.283622	0.4725	-0.879042	-0.918099	-0.655943	-0.451578	-0.906037	-0.945531	13
CHMP3	1.58984	1.36522	0.552358	0.601871	-0.62298	-0.848817	-0.512067	-0.271653	-0.694664	-0.444348	3
CHMP4A	0.572917	0.626074	0.27042	0.0275007	-0.48499	-0.334894	-0.343201	0.0807984	-0.445762	-0.296699	6
CHMP4B	2.03886	2.03378	0.82375	0.829155	-0.70388	-0.804307	-0.625483	-0.679493	-0.886995	-0.995589	22
CHMP4C	1.69035	1.56197	0.38859	0.477077	-0.502394	-0.571463	-0.497836	-0.531666	-0.570561	-0.426288	6
CHMP5	1.94603	1.71024	0.799087	0.672043	-0.444328	-0.506025	-0.661755	-0.511637	-1.04705	-0.793687	16
CHMP6	-0.562005	-0.322037	-0.276769	-0.175825	0.342488	0.0150686	0.118529	0.425464	0.504093	0.424678	6
CHMP7	2.10626	1.73274	-0.0794166	-0.173476	-0.295915	-0.521106	-0.331776	-0.269554	-0.77925	-0.768274	11
CHN1	1.50576	1.15289	0.4209	0.325753	-0.328625	-0.468973	-0.457279	-0.36883	-0.343547	-0.61803	5
CHORDC1	1.79208	1.6938	0.420659	0.356171	-0.663121	-0.513724	-0.537687	-0.488085	-0.751823	-0.563044	39
CHP1	-0.0607657	-0.368269	-0.889101	-0.649075	0.278876	0.366449	0.658633	0.623297	0.358612	0.357853	19
CHPF	-0.745075	-0.513107	-1.17918	-1.13221	0.462478	0.378989	1.01535	1.00333	0.618756	0.738229	14
CHPF2	-0.60975	-0.70945	-0.94326	-0.8255	0.506382	0.331538	0.960496	1.0226	0.511723	0.60967	20
CHPT1	-0.710139	-0.673969	-0.56815	-0.443488	0.164904	0.33501	0.641765	0.795011	0.603922	0.559475	1
CHRAC1	0.593759	0.456205	0.590934	0.319538	-0.00940117	0.0503061	-0.179281	-0.166929	-0.332539	-0.460026	7
CHRNA5	-0.975272	-0.756334	0.154624	0.191993	0.280572	0.103495	0.692878	0.575997	0.122344	0.314044	2
CHST11	-0.0644363	-0.54284	-0.88449	-0.751361	0.716629	0.53449	0.719662	0.614231	0.290538	0.0719162	1
CHST12	-0.372714	-0.277454	-0.771174	-0.681774	0.203239	0.225753	0.750972	0.618926	0.542153	0.456303	7
CHST14	-0.498004	-0.697537	-1.15143	-0.781393	0.315446	0.266766	0.973282	0.99407	0.522352	0.578521	17
CHST3	0.145967	0.176215	-0.733628	-0.778767	0.0675146	0.00869972	0.559593	0.685695	0.1975	0.37555	2
CHSY1	0.31277	0.177864	-0.482413	-0.66497	-0.0126086	-0.0185574	0.648767	0.533282	0.182139	0.288303	7
CHSY3	-0.324787	-0.347379	-0.644503	-0.782621	0.176493	0.113948	0.863147	0.895177	0.358573	0.419753	19
CHTF18	-0.0877431	-0.360388	0.385058	0.405686	-0.037452	0.0560539	0.180185	0.207064	0.0131157	0.211698	28
CHTF8	-0.849529	-0.973056	1.05311	1.03661	0.220929	0.00615417	-0.143237	0.0386246	0.0678389	0.00265615	6
CHTOP	-0.295342	-0.405733	-0.880198	-0.989808	1.11157	1.1964	0.11939	0.299731	0.41763	0.455575	14
CHUK	2.13163	1.96994	0.147919	0.0491697	-0.756681	-0.709397	-0.246541	-0.390488	-0.548994	-0.608216	14
CIAO1	1.26951	1.2756	0.330099	0.304692	-0.478221	-0.657315	-0.402738	-0.148636	-0.386649	-0.556738	13
CIAPIN1	1.92453	1.75018	0.650036	0.687169	-0.646364	-0.665798	-0.530272	-0.550286	-0.71937	-0.86614	24
CIB1	-0.0738057	-0.129713	-0.670832	-0.565604	0.264414	0.0932714	0.551468	0.577405	0.389096	0.660203	8
CIC	-0.191976	-0.452079	1.00367	1.14273	0.257352	0.232321	-0.366386	-0.338751	-0.42925	-0.195789	25
CINP	1.89619	1.73137	-0.238616	-0.381489	-0.702524	-0.91292	-0.411685	-0.511829	0.394612	0.0280688	7
CIP2A	1.88207	1.66209	-0.261057	-0.414837	-0.332942	-0.524603	-0.0207546	-0.134126	-0.426306	-0.530932	18
CIR1	-1.11111	-1.52794	0.710175	0.716005	0.541565	0.620485	0.293225	0.18027	-0.0600966	-0.0572066	5
CIRBP	-0.086579	-0.2348	-0.0468412	0.25539	0.0811392	0.334977	-0.250606	-0.0811546	0.685432	0.672288	27
CISD1	-0.287923	-0.366572	-0.881521	-0.855596	0.613825	0.668149	0.855631	0.835623	-0.0226378	0.15698	34
CISD2	-0.49851	-0.421366	-0.738923	-0.640851	0.404594	0.345566	0.574584	0.705397	0.350328	0.315536	19
CISD3	-0.624511	-0.568704	-0.749682	-0.790212	1.12155	1.19159	0.778825	0.672291	0.332453	0.451161	6
CIT	-0.124493	-0.169761	-0.0523319	-0.0468637	0.380809	0.495659	0.670013	0.552532	-0.539325	-0.548703	91
CIZ1	0.133092	-0.128098	0.687249	0.631177	0.84803	0.775065	-0.295512	-0.230921	-0.627457	-0.581394	11
CKAP2	-0.411107	-0.425048	-0.375923	-0.304129	0.244983	0.279777	0.424805	0.300608	0.4486	0.386769	20
CKAP2L	-0.247452	0.16399	-0.335554	-0.167222	0.498917	0.486538	-0.0948228	-0.171032	0.714447	0.558919	9
CKAP4	-0.720117	-0.714076	-1.10835	-1.0778	0.685612	0.629806	0.953984	1.10218	0.521649	0.61831	138
CKAP5	0.322372	0.295258	0.159819	0.0634327	-0.386835	-0.462283	0.265535	0.230469	0.139502	0.0576795	147
CKB	1.91634	1.81995	0.633715	0.634317	-0.552198	-0.568541	-0.67031	-0.63878	-0.867696	-0.912207	116
CKLF	-0.707046	-1.00848	-1.10664	-0.942517	0.52147	0.321003	0.997094	0.927598	0.937757	0.764106	2
CKM	2.82109	2.69664	0.460617	0.440883	-0.691114	-0.523862	-1.28809	-1.10548	-0.66446	-1.44189	1
CKS1B	2.0733	1.92002	0.787393	0.758393	-0.680988	-0.593797	-0.873437	-0.802974	-1.16174	-0.941936	8
CKS2	1.03751	0.926715	0.227941	0.359582	-0.0235174	-0.238771	-0.292707	-0.48816	-0.682388	-0.595551	8
CLASP1	1.26012	1.20379	-0.0982036	-0.232083	-0.354485	-0.5328	0.154086	-0.159931	-0.1105	-0.302223	52
CLASP2	1.49545	1.34449	-0.236534	-0.423137	-0.427536	-0.459973	0.084623	-0.0837656	-0.0609234	-0.312674	46
CLASRP	-0.435636	-0.530918	0.768473	0.952566	0.576478	0.705649	-0.138168	-0.219414	-0.546469	-0.450859	7
CLC	0.754195	4.15932	0.17253	0.377433	-1.23229	0.714379	-2.39938	-1.32501	-1.26244	0.745593	1
CLCC1	-0.678023	-0.713496	-1.36604	-1.13977	0.568164	0.642603	0.951795	1.1214	0.741878	0.741014	23
CLCN2	-0.616907	-0.364172	-0.873547	-0.925106	0.20561	0.184669	0.760622	0.797017	0.812088	0.809547	4
CLCN3	-0.27655	-0.382097	-0.452976	-0.377119	-0.264435	-0.160925	0.490624	0.687854	1.07728	1.09558	17
CLCN4	0.547486	0.576426	-0.0645149	-0.169208	-0.261826	0.00543937	-0.147319	-0.0226448	0.123467	0.117034	1
CLCN5	0.289292	0.564262	-0.211686	-0.105112	-0.0954041	-0.140214	0.12062	0.261944	0.600004	0.41706	4
CLCN6	0.450411	0.502249	-0.311367	-0.118787	-0.0979299	-0.208201	-0.030077	0.0317482	0.432627	0.297421	6
CLCN7	-0.0915424	-0.111443	-0.358088	-0.708731	0.0223486	-0.16844	0.531569	0.63048	0.541215	0.61998	25
CLDN1	-0.460118	-0.354111	-0.289603	-0.304326	-0.0813465	-0.0634944	0.318023	0.476796	0.6557	0.692376	4
CLDN12	0.824705	0.80122	0.0613779	0.181658	-0.332276	-0.255041	-0.405679	-0.164394	-0.0486582	0.0414266	1
CLDN3	-0.442692	-0.346766	-0.593319	-0.592638	0.0775677	-0.0374237	0.344143	0.637664	0.815948	0.841858	1
CLDND1	-0.759424	-0.414538	-1.34603	-0.843513	0.055976	0.0151204	0.817169	0.990127	0.861791	0.958799	8
CLEC11A	1.23663	1.69772	-0.990118	-0.884311	-0.150197	-0.317896	-0.095707	1.09861	-0.524333	-0.366059	1
CLEC16A	1.06014	0.967875	-0.0565201	-0.267836	-0.350041	-0.485466	0.0274717	-0.120813	0.221252	0.096223	21
CLEC3B	1.05361	0.854042	1.16263	1.26437	-0.314408	-0.55129	0.172151	-0.553614	-0.728475	-0.857628	3
CLGN	-0.658966	-0.527333	-1.30178	-1.0878	0.634088	0.559041	0.966265	1.02032	0.623862	0.637051	38
CLIC1	1.7442	1.58046	0.747756	0.654081	-0.646733	-0.470783	-0.610668	-0.417182	-0.798962	-0.766316	51
CLIC2	0.902451	0.829528	0.854607	0.80743	-0.312987	-0.339928	-0.341561	-0.558009	-0.51125	-0.771371	4
CLIC3	1.16279	1.05218	-0.00616146	-0.0316743	-0.332657	-0.277645	0.0108416	-0.0937217	-0.122114	-0.268353	8
CLIC4	1.4807	1.50222	0.81582	0.783597	-0.695476	-0.815028	-0.481183	-0.43063	-0.468721	-0.580534	46
CLINT1	0.273594	0.2909	-0.0789556	-0.125118	-0.473904	-0.566251	-0.0326709	0.123061	0.73895	0.608506	51
CLIP1	2.16368	2.04907	0.540546	0.484581	-0.543769	-0.64359	-0.645254	-0.658641	-1.0074	-0.910581	78
CLIP2	1.60931	1.51825	0.327788	0.301274	-0.348264	-0.58998	-0.813533	-0.608236	-0.281774	-0.410494	2
CLIP4	0.339741	-0.486608	0.419019	-0.150905	0.263331	-0.303448	0.250058	0.470764	-0.155812	0.0581992	2
CLK1	0.190663	-0.359054	0.179382	0.361244	0.686621	0.70641	-0.324722	-0.355769	-0.175128	-0.2177	9
CLK2	-0.466977	-0.581377	0.293528	0.492671	0.748313	0.646422	-0.0716156	-0.154498	-0.1116	-0.0905255	2
CLK3	-0.397166	-0.300098	0.789304	1.00457	0.569472	0.523966	-0.266864	-0.237103	-0.430674	-0.496976	10
CLK4	-0.725272	-0.666524	-0.321283	-0.207058	1.05764	1.10479	0.182144	0.0293356	-0.0112516	0.0209122	5
CLMP	-0.83996	-1.02846	-1.86752	-1.18213	0.260841	0.228468	1.03916	1.40909	1.10097	1.15607	6
CLN5	-0.191146	-0.349153	0.708404	0.949162	-0.325079	-0.329147	0.0323351	0.181256	0.327826	0.251244	7
CLNS1A	1.96061	1.96908	0.964445	0.809335	-0.624119	-0.631465	-0.766058	-0.77072	-0.653453	-0.9745	16
CLOCK	-0.149655	-0.357909	0.657009	0.666742	0.102561	0.30154	-0.299908	-0.0489378	-0.212071	-0.158352	5
CLP1	-0.393244	-0.543059	1.20698	1.11955	-0.17719	0.0303327	-0.332283	-0.226189	-0.085686	-0.144802	14
CLPB	-0.842151	-0.63009	-0.194229	-0.076397	0.610554	0.574328	0.653074	0.791453	-0.039161	0.0600843	44
CLPP	-1.11356	-0.961287	0.371839	0.685256	0.760195	0.64882	0.694325	0.601056	-0.623828	-0.448057	33
CLPTM1	-0.616512	-0.882616	-0.929933	-1.05143	0.65623	0.555416	0.735726	0.812559	0.6639	0.778184	21
CLPTM1L	-0.609791	-0.655881	-0.896573	-0.899581	0.650384	0.581284	0.771892	0.890365	0.479862	0.568694	46
CLPX	-0.637516	-0.882721	0.302431	0.505296	0.651107	0.589146	0.693991	0.616334	-0.817119	-0.580299	34
CLSPN	-0.117572	-0.00546726	0.847389	1.04529	0.4589	0.495364	-0.193877	-0.340154	-0.832614	-0.786581	21
CLSTN1	-0.161795	-0.087951	-0.681974	-0.622188	0.151142	0.0656269	0.474612	0.62119	0.300562	0.494564	14
CLSTN3	-0.898521	-0.580727	-0.67315	-0.841242	0.452715	0.270744	0.850486	0.906569	0.485694	0.731772	1
CLTA	0.769543	0.768516	0.246217	0.178267	-0.436625	-0.369597	-0.20931	-0.118314	0.0671632	0.00834663	56
CLTB	0.732345	0.66323	0.114316	0.0951648	-0.3957	-0.32791	-0.197535	-0.0771535	0.0293216	0.106851	17
CLTC	0.583858	0.544428	0.35258	0.292731	-0.368197	-0.357277	-0.172453	-0.0837845	0.0887687	0.000203011	412
CLTCL1	0.511551	0.48209	0.484249	0.401121	-0.280795	-0.452637	-0.165416	0.156548	-0.0174901	-0.169985	8
CLU	-0.273342	-0.219033	-0.131293	0.0194797	0.142604	0.14875	0.410288	0.367151	0.158667	0.156987	94
CLUAP1	0.824853	0.990144	0.634505	0.58564	-0.541545	-0.475888	-0.431494	-0.338025	-0.173623	-0.370225	2
CLUH	1.23593	1.17784	0.737416	0.715766	-0.517567	-0.53734	-0.50936	-0.447575	-0.495682	-0.433807	85
CLYBL	-0.565088	-0.267557	0.427133	0.745892	0.528776	0.46861	0.480578	0.465759	-0.604065	-0.575155	15
CMAS	-0.276441	-0.307666	0.353828	0.43883	-0.0387492	-0.0277473	-0.342595	-0.299135	0.669258	0.568402	32
CMBL	2.75184	2.52889	0.996028	0.918215	-0.773855	-0.910579	-0.969365	-0.983123	-1.14823	-1.23237	22
CMC1	-1.29075	-1.15299	0.218741	0.283081	0.713757	0.747201	1.09591	1.11975	-0.582718	-0.562227	6
CMC2	0.0473979	0.0624804	-0.579074	-0.488374	0.60263	0.538075	0.637649	0.590289	-0.156747	-0.23351	3
CMC4	-0.790576	-1.15233	-0.0374413	-0.0292727	1.23825	1.3103	0.750441	0.788581	-1.30119	-0.765584	4
CMIP	1.46306	1.3834	-0.306932	-0.662911	-0.424029	-0.347598	0.215089	0.173781	-0.160475	-0.287768	7
CMPK1	2.24929	2.23163	0.892694	0.799756	-0.488159	-0.658249	-0.928987	-0.963889	-1.20945	-1.10985	50
CMSS1	-0.959478	-0.825453	-0.416138	-0.533403	-0.00917348	0.335071	0.21289	0.211679	1.22537	0.866883	11
CMTM4	-0.159718	0.226221	-0.823217	-0.734778	0.0536952	-0.107622	0.603522	0.783242	0.400835	0.46216	2
CMTR1	-0.266085	-0.268552	1.09551	1.16867	-0.0607291	0.0169028	-0.279331	-0.26993	-0.110385	-0.156398	43
CMTR2	0.541133	0.36624	0.536549	0.741509	0.0905111	-0.23341	-0.260698	-0.412347	-0.410683	-0.432002	7
CNBP	1.29024	1.27225	0.692874	0.646238	-0.716879	-0.873896	-0.777424	-0.887744	0.243974	0.203472	54
CNDP2	1.88626	1.59429	0.624227	0.497875	-0.628492	-0.480107	-0.736423	-0.778088	-0.631757	-0.704187	40
CNEP1R1	-0.533421	-0.682197	-0.768962	-0.783227	0.792535	0.796853	0.405456	0.521538	0.434023	0.521741	2
CNIH4	-0.00534932	0.164066	-0.301052	-0.274092	0.155097	0.0386127	0.129044	0.188738	0.17648	0.149138	5
CNKSR1	2.28128	2.17994	0.430262	0.403452	-1.05209	-0.590557	-0.636701	-0.617869	-0.893229	-0.800148	2
CNN2	1.88553	1.64724	0.31166	0.282553	-0.84358	-0.631075	-0.323271	-0.337437	-0.653245	-0.657437	31
CNN3	1.59359	1.53198	0.841442	0.820598	-0.627944	-0.717893	-0.347656	-0.454411	-0.834943	-0.998918	28
CNNM2	-0.166276	-0.0756539	-0.731886	-0.628103	0.287071	0.131619	0.730776	0.662639	0.415874	0.360544	9
CNNM3	-0.627537	-0.815516	-1.25053	-1.26108	0.460067	0.412719	0.995866	1.10892	0.679775	0.73848	20
CNNM4	-0.844229	-0.988735	-1.18015	-1.18252	0.458822	0.426852	1.05281	1.14606	0.492758	0.712896	11
CNOT1	-0.3881	-0.325822	0.082692	0.0279274	-0.257516	-0.201585	0.384852	0.458943	0.523341	0.496272	154
CNOT10	-0.838864	-0.656162	0.182305	0.0674108	-0.205928	-0.198385	0.388482	0.509518	0.686822	0.679405	33
CNOT11	-0.698533	-0.413774	0.218611	0.128873	-0.245908	-0.285798	0.394917	0.52619	0.549958	0.598688	6
CNOT2	-0.483	-0.315303	0.476466	0.595936	-0.311394	-0.292074	-0.0199121	0.0154854	0.468577	0.362722	21
CNOT3	-0.0126629	-0.163089	0.738573	0.668388	-0.338235	-0.240649	-0.0792936	0.0697389	0.198447	0.286428	21
CNOT4	1.31352	1.20728	0.781587	0.696501	-0.338739	-0.435022	-0.304675	-0.414784	-0.81001	-0.749879	13
CNOT6	-0.53788	-0.218183	0.264368	0.139689	-0.200419	-0.139165	0.239169	0.0537171	0.527322	0.495513	11
CNOT6L	0.125732	0.0885329	0.262225	0.251088	-0.400099	-0.306774	0.0645308	0.206109	0.545309	0.454754	12
CNOT7	-0.329022	-0.249325	0.347346	0.434364	-0.247163	-0.318269	0.169376	0.182065	0.514532	0.38404	22
CNOT8	-0.236283	-0.184181	0.273599	0.251137	-0.332606	-0.420123	0.358853	0.374488	0.528791	0.491102	7
CNOT9	-0.163109	-0.33847	0.125156	0.0360037	-0.296417	-0.289352	0.309954	0.293022	0.565238	0.405362	15
CNP	-0.4994	-0.334266	-0.237194	-0.1789	-0.0864021	-0.148053	0.448191	0.551341	0.548669	0.705243	59
CNPY2	-0.858015	-0.72993	0.0927263	0.136605	0.0772445	-0.233468	0.624285	0.616295	0.71735	-0.176839	3
CNPY3	-0.301172	-0.277069	0.689705	0.849109	0.19091	0.0856184	0.152253	0.0906753	-0.398105	-0.317303	20
CNPY4	-0.660183	-0.802379	0.891362	1.19475	0.218198	0.0353735	0.530996	0.470074	-0.585536	-0.538196	10
CNST	-0.14223	-0.263439	-0.75295	-0.758516	0.268983	0.26676	0.546654	0.579482	0.266335	0.239652	15
CNTLN	0.788433	0.82422	-0.390611	-0.38565	-0.326344	-0.469808	-0.141738	-0.106834	0.543109	0.400042	21
CNTNAP1	-0.530048	-0.521651	-0.879449	-0.842584	0.411448	0.409343	0.731369	0.817177	0.44035	0.49285	48
CNTNAP3B	-0.10275	-0.26187	-1.13649	-0.463622	0.270034	0.404758	0.53468	0.621449	0.358449	0.479705	1
CNTNAP4	-0.642886	-0.5167	-0.730249	-0.406376	0.448065	0.778116	-0.12824	-0.163456	1.00182	1.17696	8
CNTRL	0.907856	1.1458	0.284666	-0.173009	0.258188	0.0992786	0.00262517	0.243333	-1.09875	-0.965645	1
CNTROB	0.391335	0.572675	-0.0960815	0.122971	0.199308	0.168806	0.129082	0.111384	-0.237245	-0.248121	13
COA1	-0.55601	-0.599873	-0.705059	-0.756563	0.773601	0.545374	1.07281	1.02589	0.195841	0.355578	6
COA3	-1.30836	-0.898361	-1.22032	-0.997321	0.982926	0.874897	1.36844	1.45806	0.343712	0.458115	6
COA4	0.310868	0.404552	0.558594	0.299385	0.661436	0.831529	0.193878	-0.367117	-1.50406	-1.19133	3
COA5	-1.4384	-1.40239	0.942123	0.882351	0.483587	0.513253	0.35865	0.292626	0.110597	-0.0380512	1
COA6	-1.81712	-1.47141	0.846508	0.900844	0.954021	0.957874	0.818221	0.646711	-0.52167	-0.234382	5
COA7	-0.74984	-0.943831	0.355894	0.279344	0.812265	0.888832	0.497921	0.593839	-0.409838	-0.454159	21
COASY	0.802894	0.631771	0.445319	0.258685	-0.178134	-0.199867	-0.0684042	-0.100984	-0.592651	-0.413099	22
COBL	-0.519892	-0.443413	0.175485	0.193441	0.0933934	-0.0318366	0.307852	0.354544	0.280639	0.267117	55
COBLL1	0.59232	0.570731	0.524303	0.578628	-0.407803	-0.432856	-0.271694	-0.257091	-0.0932039	-0.103871	35
COCH	0.0135215	0.18458	0.291715	0.494615	-0.144197	-0.167937	0.0710755	0.0511107	-0.0269401	-0.0632036	2
COG1	1.0221	0.985083	-0.0968561	-0.272911	-0.543787	-0.566044	0.116744	0.119598	0.0687962	-0.0495298	29
COG2	0.964547	0.851524	-0.037458	-0.267639	-0.466353	-0.661483	0.103414	0.0583582	0.145299	-0.01918	25
COG3	0.882321	0.917087	0.00824468	-0.190853	-0.478958	-0.560887	0.0588263	0.0388473	0.153625	0.0353678	31
COG4	0.986065	0.904953	-0.0673184	-0.198105	-0.43215	-0.467952	0.0626484	0.0521229	0.0963968	-0.0245668	42
COG5	1.04083	1.02507	-0.0910008	-0.201387	-0.417903	-0.459288	-0.0743774	-0.0516598	-0.024227	-0.0431899	31
COG6	1.07516	1.08731	0.0554603	-0.0452154	-0.638405	-0.626508	-0.0429782	-0.0492368	-0.040273	-0.204339	24
COG7	1.21111	1.06111	-0.0156833	-0.125399	-0.506428	-0.499389	-0.0832501	-0.0206493	-0.0376339	-0.195609	37
COIL	-0.522795	-0.258491	-0.175063	-0.120856	1.02457	1.06435	0.106064	0.0377717	-0.163387	-0.178531	18
COL12A1	-0.490879	-0.432559	0.235712	0.465476	0.105672	0.0267215	0.276914	0.293788	0.0873144	0.170771	125
COL14A1	-0.430119	-0.449838	0.104346	0.219117	-0.0381176	-0.0991437	0.497734	0.368361	0.350416	0.365121	50
COL15A1	-0.571579	-0.385487	-0.169713	-0.08562	0.117696	0.0928043	0.478228	0.646752	0.347224	0.374558	21
COL18A1	0.173944	0.376022	-0.306956	-0.337843	-0.218006	-0.172588	0.197176	0.419884	0.21155	0.338123	3
COL1A1	0.454144	0.345939	0.181714	0.298101	-0.153928	-0.198548	0.151058	0.0664089	-0.148841	-0.131278	7
COL25A1	-0.154033	-0.484673	-0.79625	-0.559682	0.231793	-0.0361537	0.394778	0.741445	0.580724	0.43057	5
COL2A1	-0.381104	0.221248	-0.265494	0.203227	-0.139904	-0.332558	0.365948	0.433801	0.380922	0.218254	1
COL3A1	-0.90969	-0.820134	0.76496	1.04368	0.350269	0.154924	0.392737	0.334667	-0.143717	-0.21954	44
COL4A1	-0.790234	-0.521107	-0.370124	-0.350639	0.347701	0.320527	0.575828	0.393124	0.526461	0.578378	8
COL4A2	-0.641233	-0.459422	-0.0590256	0.114348	0.271584	0.288461	0.440343	0.464908	0.231303	0.396556	25
COL4A3	-0.338509	-0.110964	-0.190897	-0.0720141	0.170226	0.285209	0.337416	0.333356	0.188835	0.101684	2
COL4A3BP	1.69961	1.51949	-0.0844367	-0.0495188	-0.480236	-0.48711	-0.180734	-0.14596	-0.512029	-0.326352	18
COL4A4	-0.460944	-0.561476	0.128567	0.408295	0.263718	0.116383	0.425205	0.479723	-0.0599696	-0.0904591	7
COL4A5	0.286514	0.351681	0.431118	0.643097	-0.0600324	-0.310487	0.223512	-0.282387	-0.274515	-0.304161	1
COL4A6	-0.418187	-0.335339	0.0209339	0.0705604	0.0123979	-0.00891323	0.514194	0.356242	0.246207	0.240434	3
COL5A1	-0.472554	-0.378258	0.0369509	0.200632	0.128237	0.0154813	0.226926	0.18395	0.454392	0.433395	55
COL6A1	0.981975	1.02127	-0.386146	0.0845333	-0.0160579	-0.139273	0.0772509	-0.167625	-0.373986	-0.377601	1
COL7A1	-0.314094	-0.19816	-0.102938	0.0863646	0.141931	0.0110342	0.2725	0.247515	0.242427	0.292887	58
COL8A1	-0.366669	-0.471419	-0.331807	-0.158616	0.169646	0.166411	0.39046	0.400988	0.288546	0.427219	9
COLGALT1	-0.661453	-0.743446	0.0362938	0.167536	0.357299	0.208667	0.430478	0.479168	0.270902	0.398835	66
COLGALT2	-0.695013	-0.84824	-0.120149	0.0284875	0.502882	0.247736	0.593542	0.609569	-0.115415	0.500941	2
COMMD1	0.987568	0.950125	0.394671	0.358892	-0.434659	-0.481564	-0.294058	-0.240118	-0.182275	-0.338041	10
COMMD10	1.41229	1.32317	0.421053	0.310886	-0.653217	-0.658483	-0.391575	-0.514513	-0.117802	-0.488331	11
COMMD2	1.06031	1.06054	0.265923	0.201825	-0.228812	-0.534898	-0.298698	-0.156101	-0.230782	-0.450143	8
COMMD3	1.29333	1.23697	0.30604	0.251727	-0.655921	-0.780593	-0.0606432	-0.189669	-0.339677	-0.357225	1
COMMD4	1.20136	0.870916	0.119619	0.153521	-0.540195	-0.556234	-0.165985	-0.16932	-0.101189	-0.163635	9
COMMD5	1.29542	1.23253	0.279066	0.2385	-0.590074	-0.594875	-0.31191	-0.300883	-0.202306	-0.22952	11
COMMD6	1.2678	1.08772	0.264594	0.18554	-0.447118	-0.618324	-0.356274	-0.440101	-0.264549	-0.301933	5
COMMD8	1.29975	1.14746	0.223581	0.229598	-0.44294	-0.596696	-0.299384	-0.26248	-0.294209	-0.487579	11
COMMD9	1.51111	1.50527	0.132723	0.0437094	-0.579052	-0.582545	-0.320118	-0.362907	-0.36061	-0.41054	16
COMT	-0.0287858	-0.139931	-0.765954	-0.800879	0.372153	0.395036	0.468269	0.68798	0.396396	0.323413	54
COMTD1	-0.208377	-0.307683	-0.955904	-0.791515	0.555686	0.489846	0.82156	0.914261	0.251273	0.381241	11
COP1	-0.229496	-0.138751	0.506251	0.549419	0.165352	0.16099	-0.446528	-0.380408	0.422795	0.274663	6
COPA	0.445039	0.366539	-0.264788	-0.302024	-0.326337	-0.326979	0.126434	0.228022	0.376831	0.479009	183
COPB1	0.64159	0.545558	-0.0426758	-0.0300523	-0.447869	-0.447334	0.0861659	0.14958	0.150656	0.286282	161
COPB2	0.642986	0.571227	0.264902	0.29671	-0.463265	-0.464503	-0.194462	-0.10187	0.0914442	0.156337	132
COPE	0.496801	0.32273	-0.263564	-0.272015	-0.470014	-0.409375	0.140573	0.244627	0.398867	0.487109	60
COPG1	0.650394	0.542765	-0.00512604	-0.0366967	-0.438655	-0.45323	0.0391384	0.125825	0.0991399	0.237357	93
COPG2	0.24022	0.203461	0.00113874	-0.0909427	-0.392816	-0.404024	0.121174	0.286862	0.249062	0.386124	40
COPRS	0.0164865	0.277994	1.38055	1.41284	-0.560195	-0.439308	-0.443521	-0.690996	-0.144993	-0.104514	2
COPS2	0.643983	0.607963	0.694649	0.869282	-0.428286	-0.413739	-0.60343	-0.492064	-0.0417449	0.0102106	70
COPS3	0.649629	0.535072	0.521281	0.62356	-0.439697	-0.455687	-0.398082	-0.301783	0.0492179	0.0677982	46
COPS4	0.704179	0.609888	0.684211	0.735793	-0.356829	-0.43801	-0.548983	-0.525211	-0.0326551	-0.039973	66
COPS5	0.84404	0.730339	0.669797	0.877541	-0.584334	-0.65834	-0.700324	-0.616596	0.0207266	0.062364	42
COPS6	0.508233	0.462856	0.448466	0.462154	-0.279909	-0.312534	-0.275886	-0.288646	0.0265333	0.054811	36
COPS7A	0.595482	0.456147	0.532457	0.690017	-0.41167	-0.355217	-0.435498	-0.325013	-0.0188481	0.0982333	18
COPS7B	0.756922	0.604459	0.628923	0.654265	-0.618318	-0.549242	-0.456958	-0.641364	0.2144	0.17686	14
COPS8	0.687342	0.406151	0.619666	0.596569	-0.376854	-0.484064	-0.512015	-0.473363	0.0272723	-0.0566715	14
COPS9	0.180937	0.147788	-0.450586	-0.504598	0.0230781	0.0709551	0.148154	-0.490794	1.12569	0.928788	3
COPZ1	0.77579	0.640607	0.34557	0.334321	-0.479899	-0.377906	-0.141285	-0.0722331	-0.0476755	0.0240374	30
COPZ2	1.48301	1.42946	0.161672	0.215104	-0.360234	-0.394275	-0.272165	-0.376726	-0.542573	-0.562936	4
COQ10A	-0.618268	-0.299531	0.684209	0.237931	0.82061	-0.408156	0.859061	0.943432	-0.553903	-0.961044	1
COQ10B	-0.590204	-0.584094	-0.418293	-0.123083	0.346982	0.473667	0.596821	0.617875	0.0975322	0.0725005	3
COQ2	-2.08647	-1.43693	-1.44338	-1.7852	1.41816	1.3268	1.83994	1.79217	0.623144	0.740428	3
COQ3	-1.10127	-1.11278	-0.386382	-0.485561	0.601497	0.552521	0.676887	0.613352	0.41205	0.486178	8
COQ4	-0.188816	-0.167544	-0.617088	-0.660053	0.269193	0.274028	0.487903	0.614118	0.211234	0.481364	1
COQ5	-0.543288	-0.794738	-0.366399	-0.408971	0.523446	0.427135	0.69035	0.625238	0.378793	0.490321	18
COQ6	-1.24545	-1.19986	-0.784457	-0.544065	0.849919	0.672339	0.751796	0.687637	0.337457	0.585891	9
COQ7	-0.805774	-0.787698	-0.859309	-0.455729	0.509881	0.351847	0.550134	0.787913	0.588504	0.751551	7
COQ8A	-0.696248	-0.442794	-0.440695	-0.418318	0.520994	0.706516	0.836559	0.857284	-0.217964	0.0689793	15
COQ8B	-0.607198	-0.449261	-0.438562	-0.747059	0.524456	0.571502	0.911478	0.783475	-0.0522937	0.135902	22
COQ9	-0.974123	-0.800806	0.0430255	0.132675	0.814528	0.646731	0.905586	0.695865	-0.235095	-0.0778726	18
CORO1A	0.67753	0.340929	-0.245722	0.429012	-0.467297	0.512294	-0.26102	0.141531	0.450335	-0.664355	12
CORO1B	0.690469	0.597816	0.761352	0.680489	-0.316204	-0.226252	-0.250714	-0.212373	-0.518832	-0.449862	32
CORO1C	-0.457342	-0.468442	0.199743	0.357548	0.221886	0.164894	0.105886	0.1522	0.162954	0.322394	55
CORO2A	-0.45973	-0.557072	-0.368656	-0.287058	0.311652	0.193869	0.462507	0.421273	0.449805	0.524269	21
CORO2B	0.407307	0.308196	-0.107793	0.0341332	-0.121027	-0.176749	-0.026417	0.0725697	0.00679438	0.307327	2
COTL1	2.31993	2.14986	0.397941	0.346548	-0.828479	-0.673275	-0.77997	-0.616071	-0.617834	-0.849664	24
COX10	-0.642848	-0.396437	-0.844692	-0.958605	0.691236	0.472264	0.92237	1.00801	0.0793401	0.0846754	5
COX11	-0.760387	-0.835184	-0.538264	-0.124248	0.82774	0.850864	0.960964	1.14996	-0.160217	0.00394096	5
COX15	-0.404	-0.437913	-1.10102	-0.979831	0.736627	0.656786	1.19621	1.15808	0.170057	0.275869	11
COX17	-0.505443	-0.584802	-0.195179	-0.638604	0.952794	0.946857	0.520062	0.687398	-0.791774	-0.266965	6
COX18	-0.800565	-0.677829	-1.58953	-1.26551	0.730918	0.835674	1.09142	1.29184	0.597269	0.708033	4
COX19	-0.396507	-0.215762	-0.0325904	0.17363	0.453513	0.559909	0.515826	0.546279	-0.495408	-0.425174	9
COX20	-0.335549	-0.635722	-0.864899	-0.832933	0.445323	0.569737	0.936536	1.04775	0.0577826	0.0960845	9
COX4I1	-0.480142	-0.435345	-0.779673	-0.667265	0.525776	0.56201	0.849661	0.854824	0.0508691	0.0195914	82
COX5A	-0.481197	-0.49928	-0.99238	-0.87138	0.790278	0.746126	1.03976	0.856649	0.241052	0.227997	42
COX5B	-0.316634	-0.423319	-0.696136	-0.874633	0.53956	0.515276	0.975924	0.705524	0.0152989	0.130387	26
COX6A1	0.0904935	0.216192	-0.723293	-0.857454	0.49144	0.432153	0.821945	0.253175	-0.0418321	-0.0469061	3
COX6B1	-0.744215	-0.706259	-0.336899	-0.244127	0.6185	0.668949	0.832189	0.415717	0.126299	0.0534543	11
COX6C	-1.07688	-0.922752	-0.906085	-0.926018	1.01647	0.818053	1.11812	1.04903	0.289169	0.268471	28
COX7A2	0.0408344	-0.37303	-0.594727	-0.645689	0.484907	0.492833	0.750259	0.814783	-0.355446	-0.0238214	13
COX7A2L	0.167866	-0.437614	-0.6048	-0.466694	0.413554	0.414057	0.70527	0.385972	0.258099	0.0888138	12
COX7B	-1.37518	-1.01054	-1.28241	-1.28506	1.04946	1.03728	1.43225	1.4787	0.154171	0.311604	6
COX7C	-1.45527	-1.57309	-2.13118	-2.14668	1.35939	1.14377	1.80025	1.70837	1.2449	1.03348	3
CP	1.48111	1.22771	0.066951	0.0634094	-0.100909	-0.719553	-0.607328	-0.54129	0.0773121	-0.243066	1
CPA4	-0.244973	-0.336712	0.663816	0.884433	-0.122539	-0.00655057	0.0559596	0.0361642	-0.0530386	-0.166304	5
CPD	-0.520255	-0.575352	-0.863113	-0.724715	0.193787	0.176636	0.663783	0.795636	0.709381	0.675013	62
CPE	-0.207948	0.0845375	0.029993	0.0694872	0.252774	-0.0800554	0.218018	-0.175041	0.368269	0.107544	3
CPEB2	0.224323	0.86752	0.399841	0.772468	-0.37972	-0.349384	-0.246975	-0.347602	-0.260533	-0.326655	3
CPEB4	0.285961	0.221402	0.40781	0.261084	-0.238661	-0.308613	-0.158784	-0.123287	0.253544	0.15118	6
CPM	-0.348439	-0.312492	-1.11839	-1.07791	0.15585	0.00410198	0.76337	0.869847	0.884041	0.896419	26
CPNE1	1.71725	1.67075	0.716115	0.588492	-0.553708	-0.55011	-0.614678	-0.53559	-0.794749	-0.764527	33
CPNE2	0.873847	0.906263	0.450776	0.327033	-0.745489	-0.900094	-0.416542	-0.344331	-0.110316	0.0397059	5
CPNE3	1.52433	1.3238	0.166337	-0.0349794	-0.477539	-0.511709	-0.271015	-0.255835	-0.268872	-0.22077	24
CPNE8	0.776784	0.760419	0.24962	0.28731	-0.46433	-0.659832	-0.288112	-0.175823	0.179201	0.0983906	22
CPOX	-0.498726	-0.550591	0.743454	0.72727	0.54112	0.515127	0.0625498	0.166771	-0.725279	-0.393458	29
CPPED1	2.23335	2.13122	0.790279	0.773412	-0.6417	-0.798945	-0.707774	-0.642329	-0.775774	-0.74681	16
CPQ	0.00957947	-0.323673	0.478651	0.770985	-0.0982628	-0.925776	-0.0570786	0.551273	0.117291	0.18135	2
CPS1	-0.624172	-0.637423	0.505524	0.723319	0.602749	0.56251	0.540535	0.467862	-0.746729	-0.577988	724
CPSF1	-0.310487	-0.326409	-0.130202	-0.178506	1.10033	1.11792	-0.0398658	-0.107933	-0.140851	-0.220322	59
CPSF2	-0.516398	-0.489052	-0.026396	0.020585	1.01743	0.99071	0.041551	-0.0601484	-0.0860032	-0.126265	55
CPSF3	-0.125362	-0.0943252	0.183567	0.0943945	0.670454	0.693274	-0.0397943	-0.115788	-0.243178	-0.328838	52
CPSF4	-0.435163	-0.395383	-0.267197	-0.216456	1.11025	1.19014	0.0294098	-0.11458	-0.00755632	-0.0588377	9
CPSF6	-0.0534918	-0.137297	1.45577	1.49019	0.112769	0.235344	-0.447395	-0.475215	-0.722363	-0.48625	39
CPSF7	-0.718227	-0.611608	1.63018	1.71328	0.361261	0.47096	-0.510907	-0.43851	-0.590654	-0.533457	40
CPT1A	-0.348963	-0.396304	-0.978793	-0.988834	0.592563	0.53848	0.916726	0.98757	0.115385	0.219782	87
CPT2	-0.559184	-0.464705	-0.191424	-0.19303	0.613442	0.538934	0.570197	0.680006	-0.00045321	0.0799331	48
CPTP	1.15355	0.89269	0.540978	0.489213	-0.49955	-0.91227	-0.168325	-0.453401	0.0280771	-0.366626	1
CPVL	-0.594271	-0.279951	0.15913	0.33781	-0.222418	-0.209452	0.54291	0.589614	0.21525	0.0659391	5
CRABP2	2.55753	2.36833	0.37599	0.177745	-0.914175	-0.709188	-0.667677	-0.623854	-0.748294	-1.03095	5
CRADD	1.78728	1.68495	0.321905	0.287533	-0.0743058	-0.204556	-0.411097	-0.300768	-1.29195	-0.698444	3
CRAMP1	-0.389086	-0.317002	0.390912	0.267844	0.27424	0.391446	-0.339806	-0.363946	0.410537	0.546242	4
CRAT	-1.02582	-1.15586	0.522454	0.797567	0.739697	0.776506	0.735527	0.794441	-0.509567	-0.661172	19
CRB1	-0.873825	-0.694431	0.640342	0.720273	-0.133138	0.13875	0.371511	-0.100375	0.280705	0.354528	1
CRBN	0.890111	0.835582	0.456191	0.587577	-0.337246	-0.316399	-0.358596	-0.403238	-0.328679	-0.369015	12
CREB1	-0.329097	-0.487696	0.173878	0.33317	0.701814	0.737071	-0.0517043	0.128801	-0.248618	-0.293855	4
CREB3	-0.0695003	-0.373379	-0.675618	-0.842595	0.551588	0.395206	0.470132	0.64913	0.398153	0.201224	1
CREB3L2	-0.851792	-0.655549	-0.117461	0.0807639	0.433968	0.46435	0.454472	0.510596	-0.120791	0.0639398	3
CREB5	-2.10616	-1.17824	-0.305701	-0.255275	1.44693	1.68225	0.446628	0.305983	0.238431	0.429499	1
CREBBP	-0.371525	-0.359545	1.53871	1.80177	0.0748119	0.200489	-0.443648	-0.339035	-0.71127	-0.657159	23
CREG1	-1.79807	-1.28562	0.609585	1.04569	0.328585	0.280222	0.56708	0.578172	0.25745	0.121245	1
CRELD1	-0.82809	-0.883036	-1.2848	-1.02263	0.749294	0.660178	1.08388	1.21076	0.783305	0.751948	10
CRELD2	-0.801978	-0.494227	0.939567	1.27451	0.199035	0.168782	0.370922	0.419958	-0.453556	-0.553694	15
CREM	-0.538445	-0.707533	-0.000551503	0.0127158	0.728831	0.702702	-0.0998006	0.0197151	0.429451	0.266519	5
CRIM1	-1.15017	-1.15794	-0.735304	-0.790021	0.207947	0.351967	1.02662	1.08555	0.787461	0.837486	20
CRIP2	1.26601	1.14207	1.06011	1.0028	-0.528726	-0.469049	-0.550905	-0.49535	-0.853773	-0.907388	37
CRIPT	1.52682	0.697836	1.74672	1.33768	-0.280412	-0.728133	-1.21384	-1.00205	-0.299022	-0.95598	3
CRK	1.61229	1.40586	0.837757	0.660969	-0.407685	-0.49949	-0.576543	-0.670214	-0.865095	-0.772547	20
CRKL	1.8149	1.7054	0.926722	0.681519	-0.573691	-0.447812	-0.667069	-0.713231	-0.956155	-0.761342	18
CRLF1	-0.24696	-0.346108	-0.294831	-0.133965	0.12028	0.0317418	0.622809	0.563032	0.456357	0.453802	17
CRLF3	1.79118	1.79886	0.513588	0.513046	-0.362743	-0.68597	-0.560456	-0.439281	-0.799027	-0.698972	15
CRLS1	-0.339511	-0.554369	-0.723309	-0.685504	0.411581	0.302453	0.888361	0.803062	0.25182	0.349758	1
CRMP1	1.94817	1.88252	0.196921	0.274059	-0.535783	-0.768065	-0.691236	-0.603774	-0.934023	-0.860094	13
CRNKL1	-0.630984	-0.575916	-0.0465804	-0.255498	1.01455	1.18216	0.0659133	0.0541454	0.0110483	0.069399	37
CROCC	0.608182	0.7129	0.0567601	-0.0451538	0.1618	0.0828703	-0.0867084	-0.00609092	-0.437389	-0.271279	23
CROT	0.0598874	0.156378	0.112351	0.351523	-0.0439592	-0.0671905	0.0602174	0.240173	-0.100459	-0.133467	8
CRTAP	-0.589174	-0.480961	-0.0251544	0.118071	0.406914	0.294724	0.541931	0.513843	0.134419	0.0633395	43
CRTC1	2.12609	1.63124	0.546322	0.532157	-0.75446	-1.06098	-0.307152	-0.808111	-0.760937	-0.385578	3
CRTC2	0.295119	0.300032	0.805446	0.905806	0.0472813	-0.182175	-0.316241	-0.111052	-0.535858	-0.517904	3
CRTC3	0.141506	0.0219951	1.07192	0.896053	-0.116695	-0.378741	-0.109225	-0.124309	-0.0601717	-0.729963	10
CRY1	-0.259019	-0.482769	0.671262	0.677438	-0.221965	-0.150015	-0.13928	-0.0102661	-0.124825	-0.150361	8
CRY2	0.681157	0.500292	0.659091	0.593017	-0.376	-0.0627805	-0.250286	-0.228492	-0.22143	-0.590228	1
CRYAB	1.90708	1.74135	0.206963	0.0950247	-0.553711	-0.479992	-0.413941	-0.371635	-0.5236	-0.482959	17
CRYBG1	1.11068	1.18134	1.19249	1.13182	-0.476409	-0.547666	-0.890882	-0.67634	-0.884283	-0.436412	1
CRYBG3	1.17891	1.03064	0.149048	0.0392883	-0.285937	-0.252411	-0.316253	-0.105263	-0.182763	-0.417364	13
CRYZ	0.758278	0.421786	0.369396	0.512326	0.256648	0.119662	0.0984964	0.0294381	-0.924199	-0.639368	37
CRYZL1	1.93392	1.89752	0.989224	0.992557	-0.626533	-0.663409	-0.844367	-0.991244	-0.961822	-0.833068	10
CS	-0.196454	-0.245724	0.396609	0.58052	0.493249	0.425399	0.372348	0.29715	-0.657223	-0.588033	84
CSDC2	1.52571	1.4697	0.285919	0.255072	-0.00528866	-0.17545	-0.503297	-0.273672	-0.159327	-1.71502	1
CSDE1	1.14972	1.13461	0.594987	0.572822	-0.600015	-0.560574	-0.70163	-0.674043	-0.0935257	-0.185233	117
CSE1L	1.35533	1.32114	0.0199884	-0.17969	-0.439232	-0.548993	-0.128808	-0.0767367	-0.198882	-0.239398	186
CSF1	-0.513752	-0.675744	-0.190442	-0.15556	0.0157165	-0.0350998	0.611827	0.598696	0.607401	0.712492	8
CSF2RA	-0.355507	-0.214837	-0.958307	-0.906651	0.288868	0.259539	0.706229	0.774306	0.781797	0.789815	4
CSGALNACT1	-0.254503	-0.384641	-1.2092	-1.26994	0.341053	0.259503	1.04638	1.05229	0.531212	0.592199	1
CSGALNACT2	0.317445	0.168679	-0.421252	-0.330293	0.0697359	-0.0452344	0.331664	0.424327	0.0787687	0.26876	6
CSK	1.52762	1.37594	0.137644	0.134868	-0.343414	-0.488747	-0.364896	-0.390918	-0.408143	-0.426615	17
CSNK1A1	0.564279	0.244924	0.00221853	0.176839	-0.0662427	-0.072421	-0.00808229	-0.0189998	0.0759461	0.00203534	10
CSNK1D	0.36714	0.311385	0.194371	0.321754	-0.141203	-0.241941	-0.229833	-0.213024	0.163306	0.293864	4
CSNK1G1	-1.01802	-1.11508	-1.16391	-1.05535	0.199951	0.175807	1.13629	1.31483	1.35479	1.38904	5
CSNK1G2	0.00655915	0.0919958	-0.551496	-0.481135	-0.151398	-0.312945	0.262644	0.434857	0.713208	0.665354	3
CSNK1G3	-0.675648	-1.16869	-1.02408	-1.24146	0.135226	0.210823	0.95965	1.06716	1.07592	1.1464	5
CSNK2A1	0.645601	0.427655	0.38277	0.322847	-0.0469088	0.136725	-0.566013	0.00598552	-0.405279	-0.396951	6
CSNK2A2	0.51751	0.445591	1.00801	1.05636	-0.0501404	-0.00739847	-0.471532	-0.560194	-0.731162	-0.547522	32
CSPG4	-0.371263	-0.294963	-0.685651	-0.51768	0.10676	-0.00986457	0.35865	0.576984	0.629464	0.583028	47
CSPP1	-0.241117	-0.675166	0.92955	0.769391	-0.163452	-0.276848	-0.168042	-0.174801	0.326685	0.37814	2
CSRP1	2.27544	2.22671	0.80529	0.696295	-0.851654	-0.858039	-0.819974	-0.731192	-0.972793	-0.909704	87
CSRP2	0.0617557	0.0717414	1.59887	1.67125	-0.285395	-0.255262	-0.605404	-0.467759	-0.792121	-0.759218	18
CSRP3	2.25343	2.37795	0.818378	1.13799	-0.801099	-0.637484	-0.771931	-1.00257	-1.16388	-1.22287	7
CST3	-0.679752	-0.633678	0.317685	0.537306	0.204414	0.194559	0.184934	0.209636	0.0141481	0.00934204	4
CSTA	0.469156	-0.814541	0.348364	-1.48766	1.10477	0.0923538	-0.676615	0.356919	1.03781	0.328958	7
CSTB	1.88411	1.94578	-0.189505	-0.153541	-0.309626	-0.184368	-0.481956	-0.647544	-0.520277	-0.460196	22
CSTF1	0.157032	0.0244863	0.0506421	0.175171	0.725548	0.809934	-0.124614	-0.0958914	-0.573178	-0.445045	31
CSTF2	-0.321901	-0.232042	0.264108	0.289995	1.05341	1.05028	-0.0990562	-0.262905	-0.357678	-0.466544	20
CSTF2T	0.177257	0.12913	0.276429	0.358338	0.780888	0.905199	-0.146618	-0.309216	-0.723658	-0.695591	12
CSTF3	-0.458111	-0.496005	0.40746	0.304634	1.08325	1.09197	-0.0297995	-0.131794	-0.360121	-0.418884	54
CT83	-0.757757	-0.32442	-1.22231	-1.12869	0.70831	0.695294	0.870781	0.842884	0.481954	0.538294	2
CTAGE5	-0.848205	-0.629833	-0.822934	-0.816889	0.637938	0.714104	0.85463	1.02792	0.605366	0.51463	13
CTBP1	0.37222	0.38832	0.847709	0.867899	-0.175294	-0.134495	-0.250219	-0.369839	-0.357554	-0.472604	11
CTBP2	-0.0621695	-0.157323	1.17878	1.39329	0.068143	-0.00947177	-0.494543	-0.40607	-0.606551	-0.6282	20
CTBS	-0.940823	-1.01179	0.641977	0.616254	-0.0867666	0.124032	0.568502	0.633606	0.0899922	0.215477	7
CTC1	-0.0973324	-0.525133	0.542659	0.598162	-0.0358446	0.0243516	-0.126569	0.107585	0.294977	0.456656	6
CTCF	-0.604882	-0.766519	-0.791902	-0.827104	0.979657	0.92717	-0.0331203	-0.211394	0.927403	0.795022	22
CTDNEP1	-0.463545	-0.196338	-1.02196	-0.913631	0.584918	0.766742	0.621865	0.574774	0.611852	0.423345	3
CTDP1	-0.313805	-0.289861	1.30197	1.36688	-0.167875	-0.132728	-0.145491	-0.177014	-0.404785	-0.360875	32
CTDSP1	-1.12447	-1.0573	-0.628276	-0.684859	0.235299	0.160902	1.0426	1.12323	1.05168	1.06204	5
CTDSP2	-0.0410965	-0.123025	-0.618768	-0.674325	-0.147354	0.0029345	0.432004	0.414268	0.461651	0.998051	1
CTDSPL	-0.0427241	-0.199072	0.0980968	-0.234903	-0.260365	-0.266068	0.0229507	0.347476	0.194746	0.307299	3
CTDSPL2	-0.672708	-0.62423	-0.478357	-0.570221	1.91487	1.82349	0.732396	0.507587	-0.658519	-0.635487	25
CTGF	-0.490203	-0.433689	0.0215686	0.0547677	0.0167463	-0.066411	0.441442	0.383377	0.356126	0.43961	13
CTH	2.01201	1.96194	0.627499	1.02636	-0.877445	-0.914886	-0.742065	-0.823751	-0.612424	-0.889852	9
CTIF	1.66785	1.75517	-0.097142	0.102566	-0.572438	-0.377343	-0.589938	-0.534574	-0.359833	-0.405043	5
CTNNA1	0.251918	0.17322	-0.768361	-0.694922	0.0823746	0.00859586	0.578295	0.698651	0.161446	0.269051	99
CTNNA2	0.789187	0.539145	-0.0748567	-0.112491	-0.215579	-0.237636	0.068462	0.0589901	0.0914937	-0.189997	3
CTNNAL1	-0.016661	-0.195293	0.020126	-0.0447437	0.0219138	-0.0395909	0.267892	0.493274	0.0481507	0.0876778	16
CTNNB1	-0.490406	-0.449751	-0.740497	-0.800047	0.269137	0.252102	0.746929	0.863285	0.534523	0.672752	52
CTNNBL1	-0.72875	-0.857959	0.58793	0.56867	0.41272	0.46728	0.168494	0.257582	-0.18091	-0.00273684	56
CTNND1	-0.654252	-0.584218	-0.557362	-0.512258	0.380913	0.25018	0.808652	0.848324	0.389025	0.448471	99
CTPS1	2.17964	2.02034	0.107135	-0.0490517	-0.521372	-0.622346	-0.346898	-0.478458	-0.695604	-0.841679	42
CTPS2	1.7187	1.55836	0.157965	0.210163	-0.345204	-0.44115	-0.308452	-0.300644	-0.92161	-0.833626	24
CTR9	-0.23477	-0.352447	0.811673	0.890479	0.449306	0.483794	-0.244493	-0.201468	-0.359757	-0.221006	56
CTSA	-0.639113	-0.625419	0.121399	0.216368	0.0025698	-0.124176	0.663293	0.659912	0.41456	0.368527	33
CTSB	-0.96808	-0.866514	0.769141	0.77397	-0.213351	-0.272551	0.561179	0.633088	0.254469	0.0439266	11
CTSC	-0.506729	-0.429533	0.304605	0.341056	-0.0796844	-0.0599024	0.482144	0.45312	0.262811	0.178844	26
CTSD	-2.10447	-1.55955	0.637662	0.863597	0.350727	-0.293861	0.946993	0.897025	0.311283	0.654934	1
CTSF	-0.453674	-0.642837	0.410858	0.454996	-0.362682	-0.190146	0.412264	0.411212	0.151549	0.185239	3
CTSG	-0.352357	0.334282	0.557513	-0.0537973	1.44412	-0.384268	-0.15124	-0.350164	0.19145	0.47553	5
CTSH	-1.14422	-1.10966	0.517147	0.71271	-0.173062	-0.198015	0.652287	0.759592	0.400952	0.334054	4
CTSL	-0.0995605	-0.122736	0.415516	0.458657	-0.157136	0.0469313	0.314105	0.277422	0.255115	0.254387	11
CTSS	0.160206	-0.229197	0.0279033	-0.157688	-0.26859	0.525817	-0.115947	-0.225288	1.78448	-0.375127	3
CTSV	-0.241349	-0.727689	0.50234	0.889272	-0.0703149	0.189448	0.288128	0.279746	-0.430618	0.0253768	1
CTSZ	-0.765673	-0.678142	0.134121	0.250961	-0.0110058	-0.0746871	0.629454	0.958726	0.418924	0.454319	28
CTTN	1.15127	1.0077	0.137538	0.254166	-0.355046	-0.419111	-0.123674	-0.0955362	-0.344088	-0.323666	104
CTTNBP2NL	0.764219	0.734551	0.897834	0.814454	-0.340117	-0.290775	-0.420188	-0.389487	-0.340239	-0.370896	33
CTU1	1.84543	1.58302	-0.381312	-0.456715	-0.610552	-0.421894	-0.106205	-0.10585	-0.251034	-0.390541	1
CTU2	1.76313	1.78714	0.088311	-0.245473	-0.512718	-0.724323	-0.219309	-0.323135	-0.561929	-0.347359	2
CUEDC1	1.51582	1.11807	0.150098	0.415087	-0.357603	-0.425325	-0.227235	-0.334454	-0.551157	-0.598959	2
CUEDC2	1.67539	1.61422	0.940619	1.00772	-0.372693	-0.576658	-0.583115	-0.61005	-0.928834	-1.06118	13
CUL1	0.372709	0.294491	0.680488	0.720096	-0.262053	-0.251945	-0.247612	-0.179831	-0.25912	-0.241965	59
CUL2	0.572193	0.466514	0.689298	0.678723	-0.337755	-0.285524	-0.270647	-0.14102	-0.215759	-0.223204	61
CUL3	0.536878	0.335736	0.60464	0.62088	-0.30723	-0.311503	-0.181691	-0.116786	-0.185087	-0.147624	61
CUL4A	0.457302	0.343403	0.54303	0.559109	0.0457553	-0.0203715	-0.431164	-0.458678	-0.126076	-0.133556	64
CUL4B	-0.035485	-0.0115135	0.508794	0.51861	-0.0401499	-0.0962598	-0.099784	-0.102783	-0.122727	0.00364515	67
CUL5	0.57332	0.483733	0.690054	0.670867	-0.436467	-0.42671	-0.276066	-0.14799	-0.163065	-0.220802	37
CUL7	0.798453	0.673158	0.170068	0.151948	-0.520101	-0.496781	-0.0374615	-0.100172	-0.320621	-0.350742	7
CUTA	1.89288	1.87633	0.792302	0.694851	-0.260092	-0.424098	-0.634344	-0.86037	-1.07247	-1.16829	17
CUTC	0.0181393	-0.085285	0.925601	1.1197	-0.115098	-0.22551	-0.457166	-0.323504	-0.0495874	-0.0880778	10
CUX1	-0.532006	-0.565589	-0.313967	-0.278937	0.565743	0.584285	0.543688	0.492869	0.133584	0.227609	71
CWC15	-1.56585	-1.6433	1.29909	1.37346	1.19158	1.20289	-0.0679614	-0.400078	-0.558999	-0.675374	7
CWC22	-0.498699	-0.729246	-0.150223	-0.374234	0.822444	1.08251	0.316654	0.117626	0.0684107	0.00721352	39
CWC25	-0.788481	-0.891148	0.133761	0.0430992	0.71372	0.755499	0.2271	0.107196	0.215651	0.145861	4
CWC27	-0.054899	-0.0319361	1.00658	1.11615	0.160283	0.129204	-0.375476	-0.381706	-0.436637	-0.397834	33
CWF19L1	-0.270294	-0.290318	1.4701	1.50946	-0.181157	-0.214929	-0.453203	-0.407851	-0.50269	-0.476307	34
CWF19L2	-0.550818	-0.435108	0.611195	0.698789	0.186789	0.300579	-0.0286693	-0.0839097	0.0411218	0.0236634	16
CXADR	-0.612959	-0.484891	-0.791672	-0.804572	0.250518	0.111057	0.626806	0.789772	0.729076	0.811025	15
CXCR4	-0.267032	-0.641437	-1.41625	-1.59678	-0.059236	0.126059	0.950616	0.880234	1.13542	1.59414	7
CXXC1	-1.06493	-0.475441	0.614139	0.582541	0.531727	0.503902	-0.274896	-0.132102	0.0664212	0.0526955	9
CXXC5	-0.920674	-1.03277	-0.658671	-0.439745	1.28599	0.887745	0.873528	0.770254	0.0181097	-0.0794312	1
CXorf38	1.2455	1.37473	0.19383	0.0335688	-0.464402	-0.323651	-0.311376	-0.284533	-0.468484	-0.456301	13
CXorf56	-0.169244	-0.0514905	1.26697	1.20828	0.194423	0.215665	-0.467986	-0.502148	-0.708669	-0.501254	19
CYB561	-0.570136	-0.334953	-1.24847	-1.1597	-0.13354	0.0766958	0.664099	0.772186	1.38023	1.25793	2
CYB5A	-0.699027	-0.199528	-0.79142	-0.528425	0.452388	0.496088	0.723441	0.58228	0.455071	0.595288	8
CYB5B	-0.642276	-0.696638	-1.14037	-0.960649	0.695819	0.580082	0.91276	1.03876	0.484908	0.50043	23
CYB5D2	-0.671259	-0.571653	-0.0768992	-0.161904	0.316989	0.0996484	0.460468	0.589792	0.409114	0.453259	4
CYB5R1	-0.428313	-0.403149	-0.885764	-0.784964	0.665602	0.545715	0.926446	0.913394	0.0496925	0.236226	34
CYB5R2	1.53907	1.42427	0.68847	0.516104	-0.322774	-0.650677	-0.776633	-0.621246	-0.90741	-0.511393	4
CYB5R3	-0.474028	-0.463686	-0.89928	-0.894913	0.55227	0.464874	0.832939	0.88084	0.348804	0.397581	103
CYB5R4	1.59076	1.48026	0.497925	0.362672	-0.267458	-0.667497	-0.305607	-0.317831	-0.614561	-0.505719	6
CYBA	-0.616819	-0.934999	-0.501706	-1.12993	0.747317	0.531389	1.02748	0.828913	0.779239	0.632749	3
CYBRD1	0.121596	0.107462	-0.444219	-0.307372	0.0511599	0.245012	0.370953	0.6428	0.204693	0.221048	9
[truncated: 7,266 more rows]

## Sheet: HiRIEF 3.4-4.8
Protein	FS1.A.set01_tmt10plex_126	FS1.B.set01_tmt10plex_127N	FS2.A.set01_tmt10plex_127C	FS2.B.set01_tmt10plex_128N	FP1.A.set01_tmt10plex_128C	FP1.B.set01_tmt10plex_129N	FP2.A.set01_tmt10plex_129C	FP2.B.set01_tmt10plex_130N	FP3.A.set01_tmt10plex_130C	FP3.B.set01_tmt10plex_131	Min PSMs for quant
[truncated: 9,434 more rows]

[truncated: 3 more sheets: High-pH, Long-gradient, Legend]
