# Supplementary material for: SubCellBarCode: integrated workflow for robust spatial proteomics by mass spectrometry
Source: Springer Nature journal article supplement (doi:10.1038/s41596-022-00699-2), 2022-06-22
Supplement: MOESM5 [file 41596_2022_699_MOESM5_ESM22.xlsx]

## Sheet: HiRIEF 3-10-3.4-4.8 
Protein	Neighborhood Class	Compartment Class	Secretory	Nuclear	Cytosol	Mitochondria	S1	S2	S3	S4	N1	N2	N3	N4	C1	C2	C3	C4	C5	M1	M2
AACS	Cytosol	Unclassified	0.00804459	0.010132	0.978846	0.00297741	0.00266348	0.0018281	0.00153806	0.00201495	0.00239329	0.00205321	0.00249531	0.00319022	0.0205772	0.0162963	0.0599892	0.681275	0.200708	0.00119016	0.00178725
AADAT	Mitochondria	Unclassified	0.0747543	0.238573	0.0340688	0.652604	0.00879921	0.0139746	0.0330585	0.018922	0.0085477	0.0433831	0.032863	0.153779	0.00732549	0.00747615	0.00538522	0.00587019	0.00801177	0.607194	0.0454099
AAED1	Secretory	Unclassified	0.782975	0.0153925	0.0305694	0.171063	0.21241	0.0881613	0.362714	0.119689	0.00326142	0.00404574	0.00400934	0.00407602	0.00979972	0.00702497	0.00479894	0.00386134	0.0050844	0.0418639	0.129199
AAGAB	Cytosol	Unclassified	0.00284072	0.00317029	0.992718	0.00127076	0.000821117	0.000610636	0.000592751	0.000816219	0.000813255	0.00078718	0.000808332	0.000761519	0.143733	0.00942095	0.682217	0.121396	0.0359509	0.00055142	0.000719343
AAK1	Cytosol	Unclassified	0.0028589	0.00310057	0.992748	0.00129265	0.000795843	0.000633548	0.000613824	0.000815685	0.00078276	0.000776741	0.000822499	0.000718574	0.364724	0.0417463	0.515739	0.0433197	0.0272187	0.000561812	0.000730835
AAMDC	Cytosol	Unclassified	0.0095225	0.0120278	0.974717	0.0037322	0.00307901	0.00216085	0.00183688	0.00244576	0.00286558	0.00256547	0.0029559	0.0036409	0.0353001	0.0185676	0.108827	0.659948	0.152075	0.00153197	0.00220023
AAMP	Cytosol	Unclassified	0.00356942	0.00485015	0.990057	0.0015237	0.00105164	0.000813242	0.000750288	0.000954247	0.00102059	0.00102203	0.00106175	0.00174578	0.0176676	0.0258906	0.0763121	0.166069	0.704117	0.000692998	0.000830705
AAR2	Cytosol	Unclassified	0.0278992	0.0514492	0.912323	0.00832818	0.00843846	0.00555592	0.00473965	0.00916516	0.0144053	0.00781886	0.00753781	0.0216873	0.313774	0.424771	0.0341619	0.0132644	0.126352	0.00315104	0.00517714
AARS	Cytosol	C4	0.00934877	0.0116892	0.975591	0.00337107	0.00316974	0.00211655	0.00174517	0.00231731	0.00282735	0.00236068	0.0029512	0.00354994	0.0197706	0.0170988	0.0421731	0.783513	0.113035	0.00131683	0.00205424
AARS2	Mitochondria	M1	0.0405187	0.0204764	0.00786712	0.931138	0.00152586	0.00442042	0.0269657	0.00760668	0.00125485	0.00705279	0.0052365	0.00693221	0.00156556	0.00172155	0.00154314	0.00147875	0.00155812	0.886838	0.0442996
AASDH	Cytosol	Unclassified	0.018848	0.243361	0.730791	0.00700031	0.00564351	0.003904	0.00371805	0.00558249	0.00576329	0.00545955	0.00553041	0.226607	0.0510547	0.502449	0.0216066	0.0088516	0.146829	0.00259856	0.00440175
AASDHPPT	Cytosol	Unclassified	0.0059337	0.00811471	0.983412	0.00253965	0.00168879	0.00140867	0.00129125	0.001545	0.00159163	0.0015899	0.00171611	0.00321706	0.0494236	0.136152	0.174021	0.0396839	0.584132	0.00113986	0.0013998
AATF	Nuclear	N3	0.0029617	0.992692	0.00311211	0.00123409	0.00073628	0.000574501	0.000404128	0.00124679	0.0307896	0.13076	0.830151	0.000991695	0.000609809	0.000592439	0.000642968	0.00063266	0.000634238	0.000800568	0.000433521
ABCA2	Secretory	Unclassified	0.987046	0.00289113	0.00248924	0.00757354	0.541683	0.10805	0.147819	0.189494	0.000931111	0.000768828	0.000725395	0.000465796	0.000573796	0.000460755	0.000488957	0.000479396	0.000486338	0.00700842	0.000565122
ABCA3	Secretory	Unclassified	0.87176	0.0600985	0.0470486	0.0210934	0.552392	0.158942	0.0461031	0.114323	0.0180145	0.0121079	0.0162997	0.0136763	0.010054	0.00769711	0.00725763	0.00917805	0.0128619	0.00990689	0.0111865
ABCA5	Secretory	S1	0.933583	0.0513244	0.00799674	0.00709625	0.635027	0.0585097	0.162429	0.0776162	0.0424406	0.00299471	0.00418348	0.00170566	0.00262502	0.00126231	0.00128395	0.00133629	0.00148917	0.00519836	0.00189789
ABCB1	Secretory	Unclassified	0.982	0.0016114	0.00213331	0.0142553	0.519334	0.140026	0.0621994	0.26044	0.000324981	0.000498899	0.000404838	0.000382678	0.000375848	0.000438623	0.000465503	0.000426705	0.000426633	0.0125416	0.00171372
ABCB10	Mitochondria	M2	0.0119982	0.00198477	0.00275032	0.983267	0.00273477	0.00218144	0.000814523	0.00626743	0.000420409	0.000561761	0.000511714	0.000490885	0.000534867	0.000567138	0.00057721	0.000501508	0.0005696	0.00424991	0.979017
ABCB11	Secretory	Unclassified	0.791759	0.0431833	0.136854	0.028203	0.491376	0.0839898	0.135738	0.0806553	0.0146798	0.00856385	0.0108623	0.0090773	0.0723541	0.0241614	0.0164988	0.0108277	0.0130125	0.00993298	0.01827
ABCB6	Secretory	Unclassified	0.963425	0.0169148	0.0118471	0.00781274	0.543852	0.0770863	0.164907	0.17758	0.00875255	0.00284583	0.00293752	0.0023789	0.00380091	0.00195657	0.00183253	0.00194508	0.00231197	0.0052953	0.00251744
ABCB7	Mitochondria	M2	0.0305712	0.00175461	0.00191341	0.965761	0.00531112	0.0049749	0.00181317	0.018472	0.000401686	0.000526121	0.000526677	0.000300121	0.000345195	0.000378946	0.000419458	0.000382516	0.000387293	0.00859291	0.957168
ABCB8	Mitochondria	M2	0.0180365	0.00154226	0.00136709	0.979054	0.00307819	0.00198378	0.00157709	0.0113974	0.000313275	0.000525209	0.000514198	0.000189576	0.000220583	0.00025964	0.000309064	0.000295513	0.000282295	0.0163829	0.962671
ABCC1	Secretory	Unclassified	0.978239	0.0031486	0.00362836	0.0149844	0.411182	0.263253	0.0692629	0.23454	0.00077907	0.000872974	0.000757283	0.000739271	0.000710931	0.000743835	0.000734513	0.000693136	0.000745942	0.01064	0.00434439
ABCC10	Secretory	Unclassified	0.980241	0.00712185	0.00514566	0.00749199	0.520864	0.137645	0.0622012	0.25953	0.00218535	0.00178436	0.00192526	0.00122687	0.00117833	0.000993074	0.00094285	0.000948709	0.00108269	0.00654269	0.000949303
ABCC3	Secretory	Unclassified	0.985933	0.00205862	0.00253506	0.00947282	0.534961	0.135262	0.0513185	0.264392	0.000426942	0.000600246	0.000522894	0.00050854	0.000470953	0.000515754	0.000538437	0.000496443	0.000513475	0.00849589	0.00097693
ABCC5	Secretory	Unclassified	0.973912	0.00279255	0.00314586	0.0201495	0.459306	0.196746	0.0852557	0.232605	0.000654145	0.000816938	0.000704545	0.000616925	0.00058928	0.000638143	0.000653648	0.000622914	0.000641873	0.0160856	0.00406391
ABCD1	Secretory	Unclassified	0.983318	0.00197753	0.0024949	0.0122093	0.17798	0.544304	0.148911	0.112123	0.000471498	0.000554932	0.00050552	0.000445578	0.000452248	0.000488925	0.000520219	0.000522782	0.000510723	0.0101172	0.00209208
ABCD3	Secretory	Unclassified	0.977965	0.00247892	0.00294916	0.0166074	0.207894	0.466549	0.145935	0.157587	0.000595077	0.000697508	0.000622195	0.000564138	0.000554911	0.000593823	0.000607905	0.000590153	0.000602372	0.0139773	0.0026301
ABCD4	Secretory	Unclassified	0.929146	0.023101	0.0266397	0.0211137	0.388273	0.174894	0.222365	0.143613	0.00753833	0.00594263	0.00624961	0.00337047	0.0101244	0.0046873	0.00404325	0.00372639	0.00405835	0.00752679	0.0135869
ABCE1	Cytosol	Unclassified	0.00288918	0.00316427	0.992628	0.00131843	0.000800306	0.000642322	0.000619675	0.00082688	0.000785135	0.000796721	0.000833138	0.000749272	0.341556	0.038259	0.539075	0.041764	0.0319739	0.000577503	0.000740932
ABCF1	Cytosol	Unclassified	0.0053657	0.00646014	0.985679	0.00249499	0.00147455	0.00114439	0.0011174	0.00162936	0.00150149	0.00151482	0.00161657	0.00182727	0.578137	0.267937	0.0652528	0.0104002	0.0639519	0.00102739	0.00146759
ABCF2	Cytosol	C2	0.00779426	0.0203657	0.968589	0.00325091	0.00220969	0.00159318	0.00163902	0.00235238	0.00237953	0.00218963	0.00216977	0.0136268	0.0493787	0.748397	0.0220172	0.00584653	0.142949	0.00128536	0.00196555
ABCF3	Cytosol	Unclassified	0.00537666	0.00631698	0.986103	0.00220336	0.00166386	0.00119315	0.00107951	0.00144014	0.00157496	0.00143919	0.00158484	0.001718	0.0779067	0.011461	0.582432	0.286332	0.0279708	0.000923967	0.0012794
ABHD10	Mitochondria	Unclassified	0.103331	0.209107	0.032089	0.655472	0.00884642	0.0144144	0.0637316	0.016339	0.0105206	0.0343026	0.0384128	0.125871	0.00671783	0.00608835	0.00516841	0.00588645	0.00822796	0.623841	0.0316318
ABHD11	Mitochondria	M1	0.0526311	0.0950422	0.0128038	0.839523	0.00319957	0.00554244	0.0328451	0.011044	0.00319251	0.0336276	0.0225444	0.0356776	0.00261216	0.00275551	0.00240477	0.00237861	0.0026527	0.789431	0.0500915
ABHD12	Secretory	Unclassified	0.981783	0.00266913	0.00235365	0.0131946	0.0171045	0.690287	0.222948	0.0514429	0.000765653	0.000712453	0.000720464	0.000470564	0.000445002	0.000480046	0.000493353	0.000469162	0.000466082	0.00938137	0.00381326
ABHD13	Secretory	S1	0.98013	0.00417095	0.00514025	0.0105591	0.657413	0.0780338	0.0560014	0.188681	0.000799927	0.00116345	0.00112583	0.00108175	0.00105786	0.00097787	0.00101743	0.000989909	0.00109718	0.00581509	0.00474396
ABHD14B	Cytosol	Unclassified	0.0049299	0.00644735	0.986606	0.00201706	0.00157363	0.00107532	0.000969598	0.00131135	0.00146483	0.00136681	0.00147526	0.00214045	0.0246256	0.0248791	0.133349	0.502128	0.301624	0.000859902	0.00115715
ABHD15	Secretory	Unclassified	0.96949	0.00223066	0.00202051	0.0262589	0.181657	0.442615	0.244156	0.101062	0.000452116	0.000776982	0.000674512	0.000327053	0.000396511	0.000379188	0.000423093	0.000428882	0.000392838	0.0238869	0.00237194
ABHD16A	Secretory	Unclassified	0.933873	0.00502333	0.0046096	0.0564944	0.0779257	0.535651	0.228374	0.0919224	0.000923578	0.00185458	0.00141613	0.000829038	0.00100786	0.000878064	0.000901565	0.000926588	0.000895526	0.038133	0.0183614
ABHD17A	Secretory	Unclassified	0.905554	0.0640713	0.0198462	0.0105284	0.583509	0.0762369	0.104545	0.141263	0.0469539	0.00576045	0.00703839	0.00431856	0.0066294	0.00312157	0.00289072	0.00321892	0.00398556	0.00641738	0.00411104
ABHD17B	Secretory	Unclassified	0.959809	0.0199713	0.0125793	0.00764025	0.559364	0.0768605	0.158259	0.165326	0.0115469	0.00284534	0.00307219	0.00250692	0.00394851	0.00206857	0.00199619	0.00210419	0.00246186	0.00518965	0.0024506
ABHD17C	Secretory	Unclassified	0.945757	0.0252024	0.0186032	0.010437	0.534251	0.117343	0.102365	0.191798	0.00815543	0.00557715	0.00647312	0.00499668	0.00421626	0.0032009	0.00310867	0.0035653	0.00451208	0.00615953	0.00427747
ABHD18	Mitochondria	M2	0.0760422	0.0592705	0.0118947	0.852793	0.0110962	0.0108393	0.0161305	0.0379762	0.00299561	0.0146928	0.0395719	0.00201024	0.00246864	0.00266742	0.00212909	0.00234003	0.00228946	0.0710194	0.781773
ABHD3	Secretory	Unclassified	0.864371	0.0352569	0.0224736	0.0778982	0.0765773	0.5686	0.10032	0.118874	0.0114155	0.0108981	0.00670554	0.00623785	0.0048591	0.00431006	0.00374328	0.0042807	0.00528043	0.00891269	0.0689855
ABHD4	Cytosol	Unclassified	0.00341952	0.00361723	0.99113	0.0018336	0.000901316	0.000735839	0.000756261	0.00102611	0.000726322	0.000927485	0.0011147	0.000848716	0.377657	0.524865	0.0512534	0.0114223	0.0259314	0.00067073	0.00116287
ABHD6	Secretory	S2	0.986436	0.00293123	0.00332443	0.00730793	0.0205814	0.780988	0.13218	0.0526873	0.000896719	0.00076118	0.000567881	0.000705447	0.000659976	0.000705962	0.000647089	0.000628895	0.000682513	0.00412004	0.0031879
ABI1	Cytosol	C1	0.0526135	0.0575328	0.880106	0.00974773	0.0236509	0.00940235	0.0089839	0.0105764	0.0333183	0.00637055	0.00904299	0.00880102	0.757881	0.0512023	0.0247214	0.0147205	0.0315806	0.00353256	0.00621517
ABI2	Cytosol	C1	0.134398	0.0558887	0.795118	0.0145952	0.0624781	0.0201382	0.0284636	0.0233182	0.0284046	0.00717261	0.00906128	0.0112502	0.665802	0.0648665	0.0225513	0.0141979	0.0277009	0.00559513	0.00900003
ABL1	Cytosol	Unclassified	0.00277113	0.00304962	0.992836	0.00134347	0.00075372	0.000606992	0.000590047	0.000820368	0.00069899	0.000801865	0.000805756	0.000743009	0.553021	0.18017	0.218865	0.015439	0.0253404	0.000583368	0.000760102
ABL2	Cytosol	Unclassified	0.00259687	0.0028252	0.993342	0.00123571	0.000702846	0.000550999	0.000566841	0.000776181	0.000711252	0.000715507	0.000797588	0.000600859	0.587902	0.0651634	0.269755	0.0389039	0.0316171	0.000502297	0.000733409
ABLIM2	Nuclear	N4	0.0119373	0.841451	0.142524	0.00408794	0.0035946	0.00259038	0.00237429	0.00337807	0.00260036	0.00427277	0.00373803	0.83084	0.0252718	0.068582	0.00746609	0.00597844	0.0352257	0.00180859	0.00227935
ABRACL	Cytosol	Unclassified	0.00722089	0.00899046	0.980924	0.00286495	0.0023179	0.00161413	0.00141478	0.00187409	0.00214291	0.00194235	0.00219807	0.00270713	0.026864	0.0175051	0.10595	0.662083	0.168521	0.00118388	0.00168107
ABRAXAS1	Nuclear	N1	0.0067503	0.984395	0.00685121	0.00200368	0.00234585	0.00120426	0.00188702	0.00131317	0.964835	0.00916932	0.00572276	0.00466798	0.00116677	0.00125436	0.0014085	0.00141412	0.00160746	0.000902952	0.00110073
ABT1	Nuclear	Unclassified	0.00510696	0.989212	0.00337487	0.00230574	0.00118182	0.00104274	0.000933873	0.00194852	0.029705	0.242127	0.715945	0.00143577	0.000691098	0.000648706	0.000683199	0.000659874	0.000691992	0.00150104	0.0008047
ABTB2	Cytosol	Unclassified	0.00313347	0.00349437	0.991951	0.00142161	0.000866833	0.000689873	0.000667301	0.000909462	0.000897452	0.000857487	0.000915816	0.000823618	0.330553	0.0113082	0.573552	0.0590596	0.0174778	0.000596829	0.000824779
ACAA1	Secretory	Unclassified	0.76676	0.14887	0.0147552	0.069614	0.0219253	0.0308751	0.672687	0.0412731	0.0187346	0.0469952	0.0108155	0.072325	0.0033638	0.00303624	0.00257297	0.0025678	0.00321443	0.0595289	0.0100852
ACAA2	Mitochondria	M1	0.071756	0.203133	0.052639	0.672472	0.0155158	0.0155254	0.0189017	0.0218131	0.0163194	0.0264377	0.0334056	0.12697	0.0111526	0.0103148	0.00767695	0.00970332	0.0137914	0.649523	0.0229488
ACACA	Cytosol	Unclassified	0.00374174	0.00428082	0.990293	0.0016849	0.00104894	0.000821273	0.000786269	0.00108525	0.00110549	0.00104121	0.00113362	0.0010005	0.519299	0.0193612	0.399733	0.0431661	0.00873333	0.000686899	0.000998
ACAD10	Mitochondria	M1	0.139358	0.0392926	0.024295	0.797054	0.00819257	0.0191146	0.0690279	0.0430231	0.00328445	0.0138017	0.00999382	0.0122126	0.00571161	0.00601145	0.00401522	0.00384553	0.0047112	0.672215	0.124839
ACAD11	Secretory	Unclassified	0.957487	0.00561008	0.00283287	0.0340702	0.228487	0.136421	0.517473	0.0751061	0.00177472	0.00166108	0.00159479	0.000579492	0.000588431	0.000536523	0.000571409	0.000570808	0.000565705	0.0331836	0.000886578
ACAD8	Mitochondria	M1	0.0673735	0.166631	0.0398772	0.726119	0.0109761	0.0140504	0.0245974	0.0177495	0.0122179	0.0216901	0.029085	0.103638	0.00834152	0.00763957	0.00602744	0.00737906	0.0104896	0.701651	0.0244673
ACAD9	Mitochondria	M1	0.0142405	0.0120517	0.00623707	0.967471	0.00105171	0.00171249	0.00678045	0.00469584	0.0010079	0.00341219	0.00530451	0.00232711	0.00116807	0.00128695	0.00132692	0.00120174	0.00125339	0.825975	0.141496
ACADL	Mitochondria	M1	0.0776353	0.114249	0.0466976	0.761418	0.0129203	0.0197704	0.0230946	0.02185	0.013844	0.0198841	0.0332	0.0473207	0.00983288	0.00882107	0.0070865	0.00893819	0.012019	0.726108	0.03531
ACADM	Unclassified	Unclassified	0.0594167	0.416146	0.0416904	0.482747	0.0113631	0.0109332	0.0212453	0.0158752	0.0118937	0.0234931	0.0236709	0.357089	0.00854638	0.00840712	0.00599087	0.00730441	0.0114416	0.465578	0.0171686
ACADS	Unclassified	Unclassified	0.0912893	0.330262	0.0845987	0.49385	0.0161342	0.019339	0.0220231	0.033793	0.0160974	0.0506703	0.0393412	0.224153	0.0199038	0.0233023	0.0108541	0.0129669	0.0175717	0.451894	0.0419564
ACADSB	Mitochondria	M1	0.0531984	0.234533	0.0356499	0.676619	0.00942081	0.0102278	0.0187244	0.0148254	0.00981703	0.0228531	0.0252504	0.176612	0.0073632	0.00712286	0.00541565	0.00646972	0.00927846	0.65543	0.0211886
ACADVL	Mitochondria	M1	0.0328475	0.0509652	0.0102158	0.905972	0.00213124	0.00541145	0.0169235	0.00838124	0.0022233	0.0181649	0.0182546	0.0123223	0.00205611	0.0022201	0.00192474	0.0019356	0.00207923	0.864696	0.0412753
ACAP3	Cytosol	Unclassified	0.00484891	0.00561939	0.987396	0.00213571	0.0013945	0.00108809	0.00100094	0.00136538	0.00137939	0.00133662	0.00148419	0.00141919	0.608031	0.04157	0.29867	0.0316332	0.00749145	0.00085711	0.0012786
ACAT1	Mitochondria	M1	0.0582854	0.214611	0.0391442	0.68796	0.0105491	0.012105	0.0186773	0.016954	0.011513	0.0272745	0.0350554	0.140768	0.00822587	0.00781955	0.00593636	0.0071946	0.00996783	0.664828	0.0231319
ACAT2	Cytosol	Unclassified	0.00456388	0.00698047	0.986565	0.00189019	0.00138378	0.00104357	0.000936265	0.00120026	0.0013415	0.00127823	0.00138339	0.00297735	0.0125631	0.0257939	0.0354222	0.203258	0.709529	0.000839034	0.00105116
ACBD3	Cytosol	Unclassified	0.0227746	0.0612694	0.906372	0.00958363	0.00661243	0.0042171	0.00447327	0.0074718	0.00485207	0.00484674	0.00498597	0.0465846	0.12211	0.605067	0.0271923	0.00899103	0.143012	0.00325355	0.00633008
ACBD4	Secretory	Unclassified	0.873363	0.085329	0.0231633	0.0181444	0.0566487	0.29042	0.47157	0.0547241	0.0246368	0.0159269	0.0379979	0.00676745	0.004653	0.0040332	0.00408946	0.00462349	0.00576417	0.00980939	0.00833502
ACBD5	Secretory	Unclassified	0.973101	0.00249519	0.00296026	0.0214434	0.401803	0.239768	0.105314	0.226216	0.000545425	0.0007493	0.000636309	0.000564156	0.000550292	0.000592815	0.000621894	0.000590873	0.000604383	0.0189162	0.00252719
ACBD6	Cytosol	Unclassified	0.00493543	0.00608754	0.986804	0.00217279	0.0013806	0.00113414	0.0010694	0.00135129	0.00136986	0.00133162	0.00145486	0.0019312	0.0966946	0.0509082	0.154908	0.0735989	0.610694	0.000952989	0.0012198
ACBD7	Cytosol	Unclassified	0.0389613	0.0498962	0.89885	0.0122923	0.0135465	0.00949505	0.00693701	0.00898275	0.0121561	0.00905829	0.0134794	0.0152024	0.0271012	0.0258327	0.0338917	0.698294	0.11373	0.00440346	0.00788886
ACCS	Cytosol	Unclassified	0.036861	0.0441412	0.907815	0.0111832	0.0121673	0.00626129	0.0062145	0.0122179	0.00863797	0.00624922	0.0064748	0.0227792	0.249242	0.509931	0.0294196	0.0101789	0.109043	0.00362544	0.00755772
ACIN1	Nuclear	Unclassified	0.00934612	0.973145	0.00880763	0.00870114	0.00260377	0.00200432	0.00142076	0.00331727	0.00903057	0.781844	0.177229	0.00504115	0.00168483	0.00155817	0.0016538	0.00172425	0.00218658	0.00586725	0.00283388
ACLY	Cytosol	Unclassified	0.00509239	0.00725619	0.985525	0.0021264	0.00153586	0.0011426	0.00104324	0.00137069	0.00146885	0.00142166	0.00153777	0.00282791	0.0510314	0.0853027	0.113684	0.186668	0.548838	0.000914013	0.00121238
ACO1	Cytosol	Unclassified	0.00462466	0.00747555	0.98598	0.00191968	0.00140943	0.00104496	0.000945516	0.00122476	0.00136808	0.00129692	0.00139814	0.00341242	0.0116836	0.0326122	0.0321909	0.188786	0.720708	0.000845792	0.00107389
ACO2	Mitochondria	Unclassified	0.0744392	0.250279	0.0619285	0.613353	0.0159022	0.0159055	0.0181322	0.0244992	0.0166056	0.0364521	0.0364818	0.16074	0.0134644	0.013216	0.00895293	0.0109848	0.0153103	0.585544	0.0278093
ACOT1	Cytosol	Unclassified	0.110685	0.16803	0.687428	0.033856	0.0405447	0.0256963	0.0186986	0.0257457	0.0360344	0.0271087	0.0400416	0.0648457	0.21953	0.196679	0.0628543	0.106464	0.101902	0.0121907	0.0216653
ACOT11	Cytosol	Unclassified	0.00293636	0.00327452	0.992447	0.00134214	0.000822674	0.000651436	0.000633706	0.000828548	0.00080401	0.000826034	0.000831783	0.000812696	0.229024	0.0889344	0.484792	0.0439559	0.145741	0.000601917	0.000740224
ACOT13	Unclassified	Unclassified	0.254704	0.383038	0.255767	0.106491	0.097275	0.0578895	0.0383744	0.0611656	0.0913242	0.0581646	0.0891401	0.144409	0.0536757	0.0395245	0.0317963	0.0484247	0.082346	0.0588691	0.0476217
ACOT7	Cytosol	Unclassified	0.00447454	0.0103978	0.983257	0.00187038	0.00134549	0.00101668	0.000912477	0.00119989	0.00130044	0.00131333	0.0014032	0.00638087	0.0115821	0.0397669	0.0391972	0.151835	0.740876	0.000831191	0.00103919
ACOT8	Secretory	Unclassified	0.832608	0.0924464	0.0138754	0.0610707	0.0292358	0.0492205	0.700969	0.0531822	0.0151181	0.0254853	0.00613542	0.0457076	0.00344583	0.00284057	0.00237128	0.00232437	0.00289334	0.0532134	0.0078573
ACOT9	Mitochondria	M1	0.0383429	0.0491037	0.0100035	0.90255	0.0021266	0.00563393	0.0209445	0.00963786	0.00199735	0.0186186	0.0163845	0.0121032	0.00205124	0.00222236	0.00187216	0.00186629	0.00199146	0.863157	0.0393933
ACOX3	Secretory	S3	0.920974	0.0489877	0.00717536	0.0228634	0.0282571	0.0278096	0.839815	0.025092	0.0207357	0.0145403	0.00405933	0.00965236	0.00148958	0.00138596	0.00137628	0.00137625	0.00154729	0.0205441	0.00231932
ACP1	Cytosol	Unclassified	0.00504182	0.00606166	0.986723	0.00217333	0.00148409	0.00111284	0.00103658	0.00140832	0.00150761	0.00136672	0.0015284	0.00165893	0.0843283	0.0177022	0.374927	0.220163	0.289603	0.000918297	0.00125504
ACP2	Secretory	Unclassified	0.949262	0.0254247	0.0145308	0.0107828	0.509523	0.0796549	0.250708	0.109376	0.0141668	0.00388846	0.0033301	0.00403937	0.00446591	0.00247684	0.00228949	0.00243625	0.00286229	0.00795127	0.00283154
ACP6	Nuclear	N4	0.0561915	0.845631	0.0669823	0.031195	0.0197008	0.0122454	0.00948534	0.0147599	0.019767	0.0270069	0.0229765	0.775881	0.0142833	0.0144514	0.00803848	0.0111174	0.0190916	0.0208886	0.0103064
ACSF2	Mitochondria	M1	0.0660711	0.103176	0.0426858	0.788068	0.0116011	0.0155692	0.019233	0.0196678	0.0120026	0.0193709	0.0286551	0.0431468	0.00901284	0.00833936	0.00650215	0.00807825	0.0107532	0.758921	0.029147
ACSF3	Mitochondria	M1	0.0723613	0.222704	0.0254259	0.679508	0.00698109	0.00996059	0.0419615	0.0134582	0.00752737	0.0367584	0.0468317	0.131587	0.00524493	0.00507392	0.00425193	0.00464653	0.00620855	0.645502	0.0340064
ACSL1	Secretory	Unclassified	0.904075	0.00594919	0.00414096	0.0858349	0.110401	0.0919595	0.620572	0.0811421	0.00113556	0.00252481	0.00123109	0.00105772	0.000848595	0.000825919	0.000825397	0.000808921	0.000832125	0.0837544	0.00208053
ACSL3	Secretory	Unclassified	0.985831	0.00251126	0.0027504	0.00890717	0.0757141	0.655709	0.159816	0.0945922	0.00072435	0.000680922	0.00055832	0.000547672	0.000571039	0.000575563	0.000552852	0.000514326	0.000536619	0.00665722	0.00224995
ACSL4	Secretory	Unclassified	0.918956	0.00804364	0.00494464	0.0680553	0.120872	0.0942783	0.604098	0.0997083	0.00168674	0.00296836	0.00209241	0.00129612	0.000966947	0.000986857	0.000990438	0.000985585	0.00101481	0.0650634	0.0029919
ACSL5	Secretory	Unclassified	0.983312	0.00383376	0.00314004	0.00971414	0.166097	0.448628	0.28606	0.0825269	0.00140238	0.000929214	0.000846085	0.000656086	0.000607182	0.000643925	0.000638546	0.000607883	0.000642505	0.00905482	0.000659325
ACSS2	Cytosol	Unclassified	0.0116492	0.0189505	0.965145	0.00425571	0.00397755	0.00260582	0.00215207	0.00291377	0.0035907	0.00309226	0.00379549	0.00847207	0.0249834	0.0271173	0.0328975	0.20329	0.676857	0.00165101	0.0026047
ACTB	Nuclear	N4	0.0427369	0.912739	0.0365824	0.00794154	0.0119948	0.00694797	0.00745155	0.0163427	0.0233212	0.0300498	0.00657938	0.852789	0.0115847	0.00934653	0.00340749	0.0034052	0.00883846	0.00397514	0.00396641
ACTBL2	Cytosol	C2	0.0174294	0.0151812	0.961112	0.00627763	0.00474351	0.00292645	0.00354689	0.00621257	0.00355772	0.00345879	0.00323042	0.00493427	0.173563	0.657826	0.0222513	0.00772122	0.0997501	0.00191062	0.00436702
ACTG1	Nuclear	N4	0.107455	0.757192	0.116759	0.0185941	0.0182863	0.0118775	0.0181675	0.0591235	0.0196059	0.0299796	0.0125237	0.695083	0.0406154	0.0403479	0.008125	0.00503105	0.0226394	0.00784063	0.0107535
ACTL6A	Nuclear	Unclassified	0.0583313	0.851774	0.0721535	0.017741	0.0140228	0.0109848	0.0094769	0.0238468	0.0906848	0.548323	0.121096	0.0916695	0.0186049	0.0142198	0.00935123	0.0099938	0.0199838	0.00722539	0.0105157
ACTN1	Unclassified	N4	0.0134644	0.598081	0.383615	0.00483989	0.00380662	0.00283976	0.0025739	0.00424409	0.00299746	0.00512852	0.00443922	0.585516	0.0484771	0.251612	0.0139664	0.00809474	0.061464	0.00200052	0.00283938
ACTN4	Nuclear	N4	0.00995584	0.879452	0.107101	0.00349118	0.00277706	0.00203312	0.00185823	0.00328743	0.00203795	0.00437236	0.00329312	0.869749	0.0182732	0.0655716	0.00501569	0.00346769	0.0147722	0.00147374	0.00201744
ACTR10	Cytosol	C1	0.00429246	0.00526169	0.988492	0.00195362	0.00119144	0.000978186	0.000877334	0.0012455	0.00123402	0.00127585	0.00136328	0.00138854	0.815947	0.0633623	0.0745232	0.0119726	0.0226875	0.000824857	0.00112876
ACTR1A	Cytosol	C1	0.00237223	0.00291203	0.993545	0.00117108	0.000617441	0.000537966	0.000492528	0.000724298	0.000695611	0.000754828	0.000824581	0.000637012	0.824936	0.0875151	0.0543022	0.0130663	0.0137248	0.000508516	0.000662568
ACTR1B	Cytosol	C1	0.00231184	0.00278161	0.993745	0.00116122	0.000605589	0.000528548	0.000474797	0.000702907	0.000636607	0.0007567	0.000761822	0.000626476	0.802666	0.0981673	0.0715752	0.0116689	0.00966777	0.000524233	0.000636988
ACTR2	Cytosol	C1	0.00281504	0.0030111	0.992821	0.00135318	0.000764686	0.000624299	0.000604871	0.000821187	0.000700814	0.000795665	0.000871131	0.000643489	0.646891	0.162057	0.148589	0.0181739	0.0171091	0.000560389	0.000792795
ACTR5	Nuclear	Unclassified	0.071734	0.672651	0.237686	0.0179297	0.0146835	0.0106126	0.00976727	0.0366706	0.0317565	0.116165	0.0391444	0.485585	0.0681082	0.0808747	0.0143712	0.0126177	0.0617136	0.00667413	0.0112555
ACTR8	Nuclear	N4	0.0155937	0.964392	0.0148849	0.00512968	0.00325559	0.00235365	0.00341678	0.00656764	0.0202785	0.22221	0.00894292	0.712961	0.0034542	0.00341329	0.00197724	0.00185067	0.00418954	0.00255178	0.0025779
ACVR1	Secretory	Unclassified	0.980625	0.00427045	0.004314	0.0107906	0.471144	0.113283	0.0440776	0.352121	0.00106702	0.00111708	0.00109081	0.000995535	0.000863725	0.000855484	0.0008517	0.000824701	0.000918388	0.00975833	0.00103227
ACYP1	Cytosol	Unclassified	0.0220199	0.0279485	0.942807	0.00722506	0.00762695	0.00522968	0.00397662	0.0051867	0.0068012	0.00523843	0.00732252	0.00858634	0.0233754	0.0191237	0.0645154	0.706983	0.128809	0.00264293	0.00458213
ACYP2	Cytosol	Unclassified	0.00609354	0.00749175	0.983968	0.00244711	0.00194106	0.00135758	0.00119223	0.00160267	0.00183984	0.00167332	0.00184534	0.00213325	0.0295193	0.015843	0.148939	0.700672	0.0889942	0.0010254	0.0014217
ADA	Cytosol	Unclassified	0.00890562	0.0150474	0.97262	0.00342672	0.00285928	0.00207117	0.00173343	0.00224174	0.00267964	0.00242687	0.00285981	0.00708109	0.0228696	0.0319231	0.0400678	0.187175	0.690585	0.00141918	0.00200754
ADAL	Cytosol	Unclassified	0.0176404	0.0237863	0.952779	0.00579404	0.00613999	0.00418287	0.00317123	0.00414634	0.00541367	0.00429673	0.00585953	0.00821638	0.0206738	0.0221946	0.0447599	0.309846	0.555305	0.00209051	0.00370353
ADAM12	Secretory	Unclassified	0.979957	0.0035606	0.00247686	0.0140053	0.0225566	0.589874	0.320703	0.0468235	0.00110196	0.00094719	0.00104333	0.000468121	0.000454031	0.000504931	0.000517102	0.000502544	0.000498252	0.0109778	0.00302746
ADAM15	Secretory	Unclassified	0.976008	0.00221681	0.00205665	0.0197189	0.380698	0.242155	0.202061	0.151094	0.000508018	0.000762402	0.000592822	0.00035357	0.000415005	0.000391923	0.000429133	0.000417606	0.000402985	0.018483	0.00123587
ADAM17	Secretory	Unclassified	0.97877	0.00181233	0.00215022	0.0172673	0.136255	0.542684	0.214403	0.0854282	0.000412287	0.000547713	0.000462779	0.000389555	0.000388887	0.000415499	0.000454484	0.000456951	0.0004344	0.0157317	0.00153558
ADAM19	Secretory	Unclassified	0.964025	0.0198665	0.00553101	0.0105771	0.552049	0.0945163	0.143711	0.173749	0.00934452	0.00300532	0.00622055	0.00129608	0.00118448	0.00104717	0.00103033	0.00107354	0.00119551	0.00924198	0.00133511
ADAM22	Secretory	Unclassified	0.986389	0.00426287	0.00423677	0.00511155	0.515217	0.0895881	0.127169	0.254415	0.00129174	0.00112925	0.000979502	0.000862387	0.00102023	0.000805785	0.000770736	0.000779567	0.00086045	0.00426729	0.000844253
ADAM9	Secretory	S1	0.921588	0.0397541	0.0231865	0.0154711	0.631978	0.163384	0.0428198	0.0834064	0.0116064	0.0121438	0.00949947	0.00650439	0.00561868	0.00409811	0.00364862	0.00430685	0.00551422	0.00844774	0.00702335
ADAMTS8	Secretory	Unclassified	0.660018	0.266917	0.0197839	0.0532811	0.0235895	0.0188385	0.569403	0.0481872	0.0380655	0.0496856	0.011503	0.167663	0.00458669	0.00436741	0.00316745	0.00318403	0.00447833	0.0437884	0.00949276
ADAMTSL3	Cytosol	Unclassified	0.114054	0.0543771	0.811632	0.0199373	0.0392296	0.0186996	0.022217	0.0339077	0.0218745	0.00985577	0.0127654	0.00988145	0.624585	0.0909453	0.0447279	0.0141042	0.0372693	0.00528053	0.0146568
ADAR	Nuclear	N3	0.00841745	0.985252	0.00372284	0.00260774	0.00159274	0.00184508	0.000964363	0.00401527	0.0494322	0.0922469	0.842558	0.00101478	0.000748124	0.000717995	0.000755558	0.000743425	0.000757735	0.00153167	0.00107607
ADARB1	Nuclear	N1	0.0187551	0.974862	0.00376894	0.00261378	0.00937362	0.00276187	0.00415579	0.00246384	0.755497	0.0150822	0.203479	0.000803739	0.000782948	0.000747886	0.000792409	0.000715918	0.000729776	0.00178212	0.000831658
ADAT1	Nuclear	N4	0.0132181	0.727794	0.254272	0.00471516	0.00407692	0.00300297	0.00278933	0.0033489	0.00344779	0.00451755	0.00431929	0.71551	0.0106651	0.117728	0.00681259	0.00598247	0.113084	0.00193963	0.00277553
ADAT2	Cytosol	Unclassified	0.0420054	0.131503	0.812593	0.013899	0.0139846	0.0101111	0.00789612	0.0100135	0.0131216	0.010761	0.0139641	0.093656	0.017909	0.0233306	0.0153277	0.0457234	0.710302	0.00507883	0.0088202
ADAT3	Cytosol	Unclassified	0.0151498	0.0517363	0.927514	0.0055995	0.0048327	0.00350857	0.0029356	0.00387296	0.00461522	0.00417413	0.00490949	0.0380375	0.0346249	0.0231252	0.03565	0.131993	0.702121	0.00221886	0.00338064
ADCK1	Mitochondria	M2	0.0341508	0.00282963	0.00236621	0.960653	0.00604127	0.00357302	0.00126575	0.0232708	0.000639669	0.000800982	0.000976482	0.000412496	0.000428234	0.000462678	0.000510263	0.000473878	0.000491162	0.00708558	0.953568
ADCK5	Mitochondria	M2	0.190608	0.0377879	0.0342881	0.737316	0.0779021	0.0264939	0.0172286	0.0689837	0.00897973	0.00782184	0.0110625	0.00992382	0.0066768	0.00576246	0.00588924	0.00672173	0.00923787	0.0142673	0.723048
ADCY3	Secretory	Unclassified	0.984281	0.00236351	0.0032787	0.0100765	0.5393	0.14801	0.0391782	0.257793	0.00051099	0.000660839	0.000538019	0.000653663	0.000603381	0.00069145	0.000674074	0.000629717	0.000680077	0.00699882	0.00307771
ADCY4	Cytosol	Unclassified	0.0840237	0.157488	0.737781	0.0207075	0.0327347	0.0186875	0.0138783	0.0187232	0.0864759	0.0169287	0.0246101	0.0294732	0.561014	0.0505081	0.0269855	0.0245798	0.074694	0.00758622	0.0131213
ADCY5	Unclassified	Unclassified	0.114354	0.177753	0.677508	0.0303858	0.0429095	0.028445	0.0187746	0.0242247	0.0377158	0.0250298	0.0435933	0.0714136	0.048898	0.213473	0.02511	0.0471411	0.342886	0.0100664	0.0203194
ADCY7	Secretory	Unclassified	0.959438	0.00317239	0.00331993	0.0340701	0.403947	0.203526	0.147478	0.204486	0.000655416	0.00102085	0.000845149	0.000650979	0.000624344	0.000651201	0.000695733	0.000665413	0.000683242	0.0313108	0.00275936
ADCY9	Secretory	Unclassified	0.97678	0.00534248	0.00551033	0.0123677	0.550824	0.147159	0.0358542	0.242942	0.00144683	0.00137076	0.00123267	0.00129222	0.00114438	0.00109377	0.00104351	0.00103273	0.00119595	0.00829694	0.00407075
ADD1	Cytosol	Unclassified	0.0277201	0.123665	0.836203	0.012412	0.00623348	0.00471224	0.00476889	0.0120055	0.00583503	0.0127378	0.0113519	0.0937405	0.168677	0.531219	0.0248372	0.0125167	0.0989527	0.00424201	0.00817003
ADD3	Unclassified	Unclassified	0.0916888	0.543772	0.331583	0.0329555	0.0162094	0.0114173	0.0137865	0.0502757	0.0196509	0.0607649	0.038341	0.425015	0.0977239	0.141947	0.0170629	0.0105147	0.0643351	0.0119105	0.021045
ADGRA3	Secretory	Unclassified	0.967947	0.00585681	0.00518231	0.0210136	0.0964423	0.519776	0.243351	0.108377	0.00161045	0.00150616	0.0015331	0.00120709	0.0010232	0.000980893	0.00103283	0.00102533	0.00112006	0.0156426	0.00537101
ADGRB2	Secretory	Unclassified	0.980211	0.00622895	0.00493219	0.00862748	0.0633136	0.634662	0.192896	0.0893398	0.00201674	0.00164291	0.00148037	0.00108893	0.00102624	0.000962785	0.000950828	0.000952317	0.00104003	0.00601157	0.00261592
ADGRE2	Secretory	Unclassified	0.981351	0.00301487	0.00337377	0.01226	0.141922	0.572454	0.128675	0.1383	0.000768106	0.000796051	0.000753903	0.000696813	0.000675349	0.000684695	0.000675928	0.00065097	0.000686823	0.0077813	0.00447867
ADGRE5	Secretory	Unclassified	0.98385	0.00228341	0.00242989	0.0114368	0.499787	0.138452	0.186996	0.158615	0.000608344	0.00066034	0.000564614	0.000450114	0.000537336	0.000451391	0.000487864	0.00047927	0.000474033	0.0107958	0.000640988
ADGRF1	Cytosol	C1	0.0277007	0.0350569	0.928151	0.0090914	0.00949109	0.00665939	0.0047271	0.00682312	0.00816278	0.00697507	0.00936294	0.0105561	0.720823	0.102843	0.0518795	0.0197278	0.0328786	0.00336574	0.00572566
ADGRF5	Unclassified	Unclassified	0.0389705	0.578699	0.369585	0.0127452	0.0123143	0.00868464	0.00718609	0.0107855	0.0122538	0.0192068	0.0161244	0.531114	0.0641386	0.205031	0.0161265	0.0131837	0.0711055	0.00462131	0.00812386
ADGRG1	Secretory	Unclassified	0.980643	0.00264523	0.00309136	0.0136206	0.531581	0.1087	0.16674	0.173622	0.000595175	0.000818444	0.000683363	0.000548249	0.00069466	0.000577606	0.000622181	0.000598501	0.000598413	0.0119488	0.00167172
ADGRG2	Secretory	Unclassified	0.940562	0.0214186	0.0138905	0.0241291	0.272534	0.0772829	0.477084	0.113661	0.00674189	0.00751433	0.00463247	0.00252993	0.00595269	0.00237684	0.00180712	0.00153922	0.00221461	0.0200135	0.00411556
ADGRG6	Secretory	Unclassified	0.96913	0.00541636	0.00448146	0.0209719	0.491485	0.0915746	0.136662	0.249409	0.00143451	0.00152225	0.00149625	0.000963347	0.000873261	0.000868477	0.000907476	0.000892228	0.000940017	0.0195759	0.00139606
ADGRL1	Secretory	Unclassified	0.771224	0.0595114	0.14873	0.0205345	0.45315	0.0922093	0.154703	0.0711612	0.0257641	0.0109653	0.012247	0.0105351	0.0906092	0.0202982	0.0127609	0.0108365	0.0142254	0.00958584	0.0109487
ADGRL2	Secretory	Unclassified	0.990436	0.00118788	0.00164573	0.00673086	0.536718	0.132477	0.0991758	0.222066	0.000252517	0.000379858	0.00030452	0.000250983	0.000307496	0.000333512	0.000360785	0.000330257	0.000313682	0.0062838	0.000447062
ADH5	Cytosol	Unclassified	0.0048527	0.00775588	0.985396	0.0019958	0.00149082	0.00109951	0.000986	0.00127637	0.00144373	0.00135501	0.00147027	0.00348687	0.0132668	0.0277845	0.0312907	0.195227	0.717826	0.000873832	0.00112197
ADI1	Cytosol	Unclassified	0.00495711	0.0112646	0.981762	0.00201616	0.00152968	0.00112065	0.00100039	0.00130639	0.00149098	0.00144466	0.00155236	0.00677663	0.0112019	0.0325026	0.0257507	0.172575	0.739732	0.000874762	0.0011414
ADIPOR1	Secretory	Unclassified	0.984584	0.00295817	0.00333038	0.00912716	0.558096	0.095243	0.0489388	0.282306	0.000642022	0.000802758	0.000781225	0.000732161	0.00064692	0.000660464	0.0006755	0.000643572	0.000703924	0.00757567	0.00155148
ADIPOR2	Secretory	S2	0.974902	0.00514438	0.00516472	0.0147888	0.0262441	0.74708	0.139359	0.0622192	0.0014158	0.0013718	0.0011822	0.00117458	0.00102974	0.00100522	0.00100377	0.00100882	0.00111716	0.0057199	0.0090689
ADK	Cytosol	Unclassified	0.0275152	0.0440094	0.91943	0.00904567	0.00980062	0.00633563	0.00485001	0.00652891	0.00873236	0.00693801	0.00945823	0.0188808	0.0322839	0.0253743	0.0305364	0.187084	0.644151	0.00320003	0.00584564
ADNP	Nuclear	Unclassified	0.0199559	0.950215	0.0212651	0.0085641	0.00611004	0.00458469	0.00381012	0.00545107	0.0116743	0.61882	0.0164677	0.303252	0.00399092	0.00400334	0.00350311	0.00396583	0.00580188	0.00383768	0.00472642
ADNP2	Nuclear	Unclassified	0.00401239	0.989325	0.00392631	0.00273668	0.000734953	0.000756793	0.000831702	0.00168894	0.00593462	0.871249	0.10336	0.00878037	0.000809967	0.000794007	0.000793271	0.000711465	0.000817601	0.00159918	0.0011375
ADPRH	Cytosol	Unclassified	0.0053862	0.00863125	0.983685	0.00229751	0.00152	0.00127156	0.00117125	0.00142338	0.00147691	0.0014552	0.00156455	0.00413458	0.0227117	0.108586	0.073968	0.0588405	0.719579	0.00104149	0.00125601
ADRA2A	Secretory	Unclassified	0.943717	0.00479201	0.00304517	0.0484455	0.0524471	0.239905	0.60361	0.0477552	0.00124835	0.00164419	0.00108716	0.00081231	0.000564753	0.000598116	0.000645273	0.000632655	0.000604375	0.0472092	0.0012362
ADRM1	Cytosol	C1	0.0350166	0.0500899	0.90608	0.00881394	0.0127887	0.0078513	0.00610934	0.00826728	0.0239085	0.0065296	0.00975574	0.00989604	0.777522	0.0367333	0.0308723	0.0157979	0.0451543	0.00315862	0.00565531
ADSL	Cytosol	Unclassified	0.00604378	0.00901181	0.982578	0.00236645	0.00193355	0.00137291	0.00118279	0.00155453	0.00178898	0.00162929	0.00186677	0.00372677	0.016144	0.0281428	0.045603	0.268298	0.62439	0.000991983	0.00137447
ADSS	Cytosol	Unclassified	0.00749779	0.0116501	0.977979	0.00287354	0.00244955	0.00168572	0.00144706	0.00191546	0.00225475	0.00199707	0.00233616	0.00506215	0.0179099	0.0278103	0.032454	0.203398	0.696406	0.0011734	0.00170014
ADSSL1	Cytosol	Unclassified	0.0195004	0.0608864	0.912066	0.0075468	0.00604135	0.00440473	0.003888	0.00516631	0.00595782	0.00543105	0.00614	0.0433575	0.0285202	0.0406382	0.0262732	0.0802749	0.73636	0.00303814	0.00450866
AEBP1	Cytosol	Unclassified	0.00887252	0.0107661	0.976949	0.00341207	0.00287625	0.00201533	0.00172778	0.00225315	0.00265884	0.00232729	0.0027008	0.0030792	0.0315849	0.0203611	0.0615446	0.716279	0.14718	0.00139815	0.00201392
AEBP2	Nuclear	N4	0.00756925	0.961179	0.0289558	0.00229627	0.00199421	0.00136204	0.00126201	0.00295099	0.00700149	0.00680442	0.00234091	0.945032	0.00407668	0.0155229	0.00166551	0.00151228	0.00617848	0.00103465	0.00126162
AES	Cytosol	Unclassified	0.0716013	0.1563	0.745745	0.0263532	0.0185039	0.0105038	0.0131822	0.0294114	0.0161522	0.0152351	0.0150598	0.109853	0.260774	0.350333	0.0243257	0.0119933	0.098319	0.00744457	0.0189086
AFAP1	Secretory	Unclassified	0.725297	0.20723	0.0243943	0.0430788	0.0149731	0.0187847	0.668211	0.0233285	0.0323855	0.0749622	0.0185299	0.0813519	0.00513905	0.00461263	0.00411835	0.00455702	0.00596725	0.0310315	0.0120472
AFAP1L1	Cytosol	Unclassified	0.0455865	0.0200676	0.905386	0.0289598	0.013062	0.00634519	0.0149381	0.0112411	0.00519718	0.00399599	0.00699264	0.00388182	0.588387	0.191901	0.0713741	0.0250853	0.0286387	0.00325038	0.0257094
AFAP1L2	Cytosol	Unclassified	0.00633482	0.00730829	0.983688	0.00266877	0.00188993	0.00144173	0.00131178	0.00169137	0.00186189	0.00168635	0.00186009	0.00189996	0.0537991	0.0122634	0.607885	0.19031	0.11943	0.00113658	0.00153219
AFDN	Secretory	Unclassified	0.585628	0.104426	0.275369	0.0345767	0.240009	0.0698393	0.164003	0.111777	0.0423575	0.0190776	0.0124335	0.0305575	0.192242	0.0360223	0.0148754	0.0101023	0.0221272	0.0172474	0.0173293
AFF1	Nuclear	N4	0.00663221	0.985484	0.00568418	0.00219933	0.00117662	0.000981375	0.00245414	0.00202008	0.00557119	0.0546085	0.00256587	0.922739	0.000960627	0.00127164	0.000893735	0.000964096	0.00159408	0.00113331	0.00106602
AFF4	Nuclear	N4	0.00453517	0.987623	0.00612262	0.00171925	0.00125667	0.00096153	0.00116061	0.00115635	0.00292711	0.0104402	0.00185683	0.972399	0.000910111	0.00143971	0.000916349	0.00108023	0.00177622	0.000762222	0.00095703
AFG1L	Mitochondria	M1	0.0453632	0.0311873	0.0111107	0.912339	0.00262186	0.00577565	0.0287318	0.00823383	0.00238243	0.00828646	0.0119165	0.0086019	0.00219676	0.0022339	0.0021519	0.00211855	0.00240959	0.853604	0.0587344
AFG3L2	Mitochondria	M2	0.0210768	0.00367624	0.00433321	0.970914	0.00563479	0.00450949	0.0021601	0.00877241	0.000776517	0.00101493	0.000939857	0.000944942	0.000943761	0.000905245	0.000841754	0.000745725	0.000896728	0.00579248	0.965121
AFP	Cytosol	Unclassified	0.0451248	0.0577247	0.882949	0.0142015	0.0157466	0.0109499	0.00802553	0.0104027	0.0141648	0.0104778	0.0155576	0.0175246	0.031193	0.0274094	0.0415828	0.663837	0.118926	0.00506197	0.00913955
AFTPH	Cytosol	C2	0.00755926	0.0099161	0.979075	0.00344991	0.00206718	0.0016423	0.00163472	0.00221506	0.00216476	0.00221852	0.00226453	0.00326829	0.0803099	0.699312	0.036591	0.00888298	0.153979	0.00145765	0.00199227
AGAP1	Cytosol	C2	0.0171324	0.13767	0.839052	0.00614561	0.00516451	0.00369176	0.00342142	0.00485471	0.00771659	0.00473963	0.00490898	0.120305	0.0511756	0.671509	0.0166669	0.0077047	0.0919954	0.0024342	0.00371141
AGAP3	Cytosol	C2	0.0172219	0.0765969	0.899532	0.00664906	0.00492163	0.00340935	0.00341451	0.00547641	0.00550321	0.00464565	0.00465796	0.06179	0.0960457	0.632728	0.0212003	0.00821282	0.141345	0.00243916	0.0042099
AGER	Nuclear	Unclassified	0.114685	0.645743	0.192827	0.0467452	0.0147646	0.0136197	0.0157491	0.0705513	0.0179446	0.153717	0.0644062	0.409675	0.0576551	0.0657126	0.0147586	0.0120849	0.0426158	0.0212926	0.0254526
AGFG1	Cytosol	C2	0.00474929	0.00706768	0.985946	0.00223701	0.00129912	0.00107005	0.00103516	0.00134497	0.00106457	0.00140956	0.00126836	0.0033252	0.131606	0.739558	0.0508385	0.00690892	0.0570343	0.00100331	0.0012337
AGFG2	Cytosol	Unclassified	0.00569617	0.00648785	0.98547	0.00234621	0.00169022	0.0013334	0.00118357	0.00148898	0.00162186	0.00151973	0.00169046	0.00165581	0.238969	0.0276402	0.529534	0.0891075	0.100219	0.00101243	0.00133378
AGK	Mitochondria	M2	0.0134921	0.0027706	0.00351736	0.98022	0.00327034	0.00220102	0.000952084	0.00706861	0.000575618	0.000743185	0.000729091	0.000722701	0.000696814	0.00070708	0.000716002	0.000642474	0.000754993	0.00474493	0.975475
AGL	Unclassified	Unclassified	0.110324	0.254504	0.605471	0.0297012	0.043585	0.0241999	0.0169156	0.0256234	0.156129	0.0249067	0.0406549	0.0328133	0.415995	0.0416556	0.031198	0.0295678	0.0870551	0.00996346	0.0197377
AGMAT	Mitochondria	M1	0.0266049	0.0301832	0.00627998	0.936932	0.00156899	0.00321541	0.0137493	0.00807115	0.00117171	0.011377	0.01452	0.00311442	0.00125784	0.00134002	0.00125147	0.00120782	0.00122283	0.872817	0.0641151
AGO1	Cytosol	Unclassified	0.0834309	0.141322	0.758409	0.0168385	0.0267112	0.012456	0.0129786	0.0312851	0.0491882	0.0155842	0.0144874	0.0620619	0.425926	0.190248	0.0262704	0.0132596	0.102706	0.00561294	0.0112256
AGO2	Nuclear	N1	0.0379037	0.908932	0.0477234	0.00544094	0.0143407	0.00484463	0.00642876	0.0122896	0.849772	0.0117136	0.00940243	0.0380442	0.0250952	0.00696656	0.00361296	0.00311341	0.00893532	0.00229836	0.00314257
AGO3	Nuclear	N1	0.061191	0.91285	0.022249	0.00370992	0.0328241	0.00545397	0.0128685	0.0100445	0.897473	0.00513501	0.00566904	0.00457327	0.0135119	0.00241002	0.00190169	0.00181184	0.00261356	0.00180026	0.00190966
AGPAT2	Secretory	Unclassified	0.952761	0.0285947	0.00921075	0.0094333	0.029131	0.701002	0.151464	0.0711642	0.0107304	0.0115906	0.00366526	0.00260838	0.00221017	0.0018099	0.00158414	0.00166707	0.00193947	0.00539643	0.00403687
AGPAT3	Secretory	Unclassified	0.982104	0.00480066	0.00306535	0.0100299	0.0145679	0.575982	0.353798	0.0377562	0.00197747	0.00106097	0.00114889	0.000613326	0.000596959	0.000630657	0.000630994	0.000597179	0.000609564	0.00809267	0.00193726
AGPAT4	Secretory	Unclassified	0.981492	0.00611219	0.00390224	0.00849383	0.0165105	0.667081	0.252587	0.0453127	0.00227123	0.00154404	0.00141596	0.000880952	0.00085414	0.000779409	0.000749351	0.000725577	0.00079376	0.00600805	0.00248578
AGPAT5	Mitochondria	M2	0.142042	0.00538921	0.00598639	0.846582	0.0264535	0.0410852	0.0102242	0.0642795	0.00131079	0.00135122	0.00141201	0.00131519	0.00117815	0.00114522	0.00118578	0.00116423	0.00131302	0.00903029	0.837552
AGRN	Secretory	Unclassified	0.913807	0.0612455	0.0101645	0.0147834	0.131342	0.039193	0.7037	0.0395718	0.0382266	0.0092612	0.00320844	0.0105492	0.00248999	0.00188192	0.00179901	0.00186094	0.00213267	0.0124749	0.00230845
AGTPBP1	Cytosol	Unclassified	0.00412152	0.0046377	0.98941	0.00183075	0.00117591	0.000926133	0.000862685	0.00115679	0.0011646	0.00114358	0.00127346	0.00105606	0.620261	0.0348684	0.287559	0.034348	0.0123734	0.00075108	0.00107967
AGTRAP	Secretory	S1	0.872042	0.0908898	0.0296513	0.00741718	0.615194	0.0453449	0.0878162	0.123686	0.0802059	0.003479	0.00398369	0.00322123	0.0178342	0.00287228	0.00256346	0.00270578	0.00367557	0.0049177	0.00249949
AHCTF1	Nuclear	N3	0.010499	0.979332	0.00439678	0.00577248	0.0014956	0.000903533	0.000709324	0.00739052	0.0134771	0.0683463	0.896395	0.0011131	0.000890024	0.000841148	0.000818845	0.00086373	0.00098303	0.00448017	0.00129231
AHCY	Cytosol	Unclassified	0.00511504	0.00812501	0.984675	0.00208483	0.00159176	0.00115459	0.00102605	0.00134265	0.00153223	0.00141187	0.00155051	0.0036304	0.0145525	0.0289436	0.034005	0.219515	0.687659	0.000903056	0.00118177
AHCYL1	Cytosol	Unclassified	0.00327818	0.00373128	0.991551	0.00143962	0.00096314	0.000710269	0.000679686	0.000925088	0.000947565	0.000913166	0.000944162	0.000926384	0.0877059	0.00988638	0.697184	0.160743	0.0360313	0.000627312	0.000812305
AHDC1	Nuclear	Unclassified	0.013347	0.978192	0.00523855	0.00322295	0.00582221	0.00281721	0.00247873	0.00222882	0.332794	0.0451362	0.598616	0.00164556	0.00112379	0.00102965	0.00101841	0.000987465	0.00107924	0.00215987	0.00106308
AHI1	Cytosol	Unclassified	0.00250313	0.00287878	0.993273	0.00134474	0.000643724	0.000526333	0.000564672	0.000768407	0.000590106	0.000741506	0.000758297	0.000788875	0.353249	0.494551	0.056738	0.00929542	0.0794397	0.000538296	0.000806447
AHNAK	Nuclear	N4	0.00644201	0.976566	0.0145928	0.00239908	0.00197524	0.00146248	0.0013774	0.00162689	0.00155342	0.00267062	0.00210026	0.970242	0.00194457	0.00679076	0.00124579	0.00140148	0.00321021	0.00108974	0.00130933
AHNAK2	Nuclear	N4	0.0111395	0.937996	0.0469006	0.0039642	0.00348001	0.00255842	0.00240182	0.00269922	0.00280253	0.00416355	0.00368585	0.927344	0.00418747	0.0168744	0.00262786	0.00280666	0.0204043	0.00170298	0.00226121
AHSA1	Cytosol	Unclassified	0.0027262	0.00303288	0.992994	0.00124691	0.000759874	0.000598276	0.000580353	0.000787697	0.000763866	0.000764767	0.000784705	0.000719538	0.21954	0.0125471	0.665396	0.0727914	0.0227195	0.000544541	0.000702366
AHSG	Cytosol	Unclassified	0.0291269	0.0388589	0.922396	0.0096182	0.0102969	0.00676478	0.00509034	0.00697488	0.0091508	0.00700245	0.0100112	0.0126944	0.0236494	0.0272699	0.0402884	0.724849	0.106339	0.00345485	0.00616335
AIDA	Cytosol	Unclassified	0.110987	0.0962177	0.775417	0.0173779	0.0448469	0.016371	0.0173264	0.0324428	0.0376924	0.0123564	0.0109222	0.0352468	0.500417	0.165522	0.0287872	0.0140573	0.0666331	0.00644527	0.0109327
AIF1L	Cytosol	Unclassified	0.00563719	0.00637281	0.985511	0.00247927	0.00159676	0.00120627	0.00119663	0.00163754	0.00153449	0.00148911	0.00171674	0.00163247	0.544516	0.165943	0.178802	0.0489877	0.0472627	0.000980865	0.00149841
AIFM1	Mitochondria	M2	0.0167012	0.0194702	0.00668685	0.957142	0.00353565	0.00183786	0.00307657	0.0082511	0.00172704	0.00512763	0.0110117	0.00160378	0.00115305	0.00125794	0.00132358	0.0013414	0.00161088	0.132254	0.824887
AIFM2	Secretory	Unclassified	0.658623	0.0336396	0.283509	0.0242288	0.342679	0.0704055	0.161983	0.0835549	0.0140157	0.00644541	0.00710827	0.00607017	0.226573	0.0251777	0.0121548	0.00789326	0.0117099	0.0097021	0.0145267
AIMP1	Cytosol	C1	0.0464663	0.0553977	0.889385	0.0087515	0.0192335	0.00893521	0.00801455	0.0102831	0.0313927	0.00613765	0.00804082	0.00982652	0.764399	0.0479309	0.0252258	0.0136575	0.0381716	0.00331102	0.00544048
AIMP2	Nuclear	N1	0.0866019	0.760484	0.146163	0.00675097	0.0559785	0.00775358	0.0102661	0.0126037	0.741018	0.00570093	0.00899553	0.00476982	0.119865	0.00722359	0.00554123	0.00494393	0.00858923	0.00293034	0.00382063
AIP	Cytosol	Unclassified	0.00284048	0.00321724	0.99266	0.0012821	0.000805405	0.000622823	0.000602124	0.000810124	0.000809268	0.000795879	0.0008139	0.000798192	0.11282	0.017998	0.669391	0.0880689	0.104382	0.000573284	0.000708816
AJUBA	Cytosol	Unclassified	0.00483823	0.00653457	0.986487	0.00213995	0.0013342	0.00111267	0.00106307	0.00132829	0.00130327	0.00134578	0.0014366	0.00244892	0.169408	0.190705	0.100032	0.0343339	0.492008	0.000935349	0.0012046
AK1	Cytosol	Unclassified	0.00555942	0.00811564	0.984082	0.00224333	0.00175654	0.00124935	0.00110094	0.0014526	0.001664	0.00152598	0.00168934	0.00323633	0.0195906	0.0227384	0.0459779	0.333717	0.562057	0.000953088	0.00129024
AK2	Nuclear	N4	0.035367	0.868481	0.0412692	0.0548825	0.0101769	0.00784319	0.00736929	0.00997761	0.0102537	0.0300631	0.019171	0.808994	0.00856261	0.0101469	0.00537254	0.00667746	0.0105096	0.0449884	0.00989415
AK3	Mitochondria	M1	0.0980903	0.0875871	0.0278839	0.786439	0.00806336	0.0148509	0.0593581	0.0158179	0.00759478	0.0158949	0.0258717	0.0382257	0.00576295	0.00521147	0.00466583	0.00530337	0.00694027	0.735237	0.0512013
AK4	Mitochondria	Unclassified	0.190623	0.176156	0.0816282	0.551592	0.0204802	0.0454965	0.0526979	0.0719487	0.0112164	0.0535589	0.0600795	0.0513014	0.0196637	0.0236674	0.011148	0.0110359	0.0161133	0.42619	0.125402
AKAP1	Unclassified	M2	0.461263	0.0057077	0.00629068	0.526739	0.059471	0.205991	0.076285	0.119516	0.0012282	0.00164837	0.00155622	0.00127492	0.00123918	0.0012299	0.0012398	0.00123845	0.00134335	0.0443682	0.482371
AKAP10	Cytosol	Unclassified	0.0028592	0.0032079	0.992615	0.00131802	0.000795877	0.000635237	0.000611241	0.000816843	0.000782209	0.00080573	0.000828434	0.000791527	0.364942	0.0291029	0.523304	0.0469652	0.0283004	0.000576744	0.000741279
AKAP11	Cytosol	Unclassified	0.0415269	0.0213893	0.927263	0.00982095	0.0160346	0.00813655	0.00858098	0.00877478	0.0068716	0.00396387	0.00543968	0.00511416	0.621744	0.204595	0.055959	0.0173031	0.0276616	0.0027597	0.00706125
AKAP12	Cytosol	C2	0.00683249	0.00867677	0.981446	0.00304463	0.00194731	0.00159491	0.00147516	0.00181511	0.00175856	0.00206122	0.00211943	0.00273756	0.115193	0.744588	0.0340704	0.00645208	0.0811427	0.00131629	0.00172834
AKAP13	Cytosol	Unclassified	0.0061792	0.00648068	0.98475	0.00259044	0.00190492	0.001388	0.00125451	0.00163177	0.00156471	0.00151164	0.00166855	0.00173578	0.624707	0.290183	0.0413145	0.0100782	0.018467	0.00102486	0.00156558
AKAP5	Secretory	Unclassified	0.974175	0.00258645	0.00294456	0.0202939	0.550524	0.071657	0.0596525	0.292342	0.000472614	0.00085603	0.000680545	0.000577266	0.000524199	0.000589498	0.000634942	0.000595348	0.000600569	0.0178878	0.00240619
AKAP8	Nuclear	N2	0.00287846	0.992091	0.00347969	0.00155089	0.000714138	0.000527094	0.000955052	0.000682177	0.0150731	0.935176	0.0220183	0.0198239	0.000603979	0.000614245	0.000764987	0.000701009	0.000795474	0.000915834	0.000635059
AKAP8L	Nuclear	N4	0.0245709	0.957006	0.0125482	0.00587442	0.00393122	0.00306548	0.0130889	0.00448533	0.0774492	0.0671785	0.00684865	0.80553	0.00217776	0.00227896	0.00201055	0.00233739	0.00374358	0.00311913	0.0027553
AKAP9	Cytosol	C1	0.11059	0.0506109	0.826338	0.0124609	0.0553062	0.015552	0.0178885	0.0218433	0.0276556	0.00637907	0.00745702	0.00911917	0.695013	0.0671582	0.0262251	0.0120517	0.0258905	0.00461626	0.00784462
AKIP1	Unclassified	Unclassified	0.334228	0.134669	0.019999	0.511104	0.0169998	0.0302049	0.227908	0.0591147	0.00905614	0.074898	0.0424477	0.00826753	0.00479734	0.00430403	0.00350347	0.00335599	0.00403815	0.447763	0.0633412
AKIRIN1	Unclassified	Unclassified	0.0565741	0.50867	0.420457	0.0142994	0.0151313	0.00853075	0.00957919	0.0233329	0.0663772	0.0219964	0.0142181	0.406078	0.103092	0.203653	0.0161238	0.010642	0.086946	0.00533086	0.00896853
AKIRIN2	Cytosol	Unclassified	0.0378387	0.0943639	0.85694	0.0108571	0.0122956	0.00703238	0.00646233	0.0120484	0.0257309	0.00950558	0.00897212	0.0501553	0.243604	0.408739	0.0286775	0.0132292	0.162691	0.00409766	0.0067594
AKR1A1	Cytosol	Unclassified	0.00288313	0.00424675	0.991633	0.00123696	0.000858295	0.000646505	0.000599712	0.000778621	0.000842996	0.000831284	0.000849772	0.00172269	0.0177599	0.0192229	0.0735368	0.161268	0.719845	0.000567802	0.000669162
AKR1B1	Cytosol	Unclassified	0.00332696	0.00519245	0.990068	0.00141276	0.00100119	0.000743139	0.000684639	0.000897994	0.000989283	0.000952188	0.000986287	0.00226469	0.0160476	0.0222024	0.0567149	0.152421	0.742681	0.000639458	0.000773305
AKR1B10	Cytosol	Unclassified	0.0829689	0.108795	0.782127	0.0261092	0.0300629	0.0193659	0.0139662	0.0195739	0.0273768	0.0200425	0.0306117	0.0307637	0.050209	0.027489	0.0476841	0.537697	0.119048	0.00887569	0.0172335
AKR1C1	Cytosol	Unclassified	0.00712694	0.0117236	0.978411	0.00273822	0.00226594	0.00165401	0.00140642	0.00180057	0.00212802	0.00195667	0.00226088	0.00537807	0.0159773	0.0306674	0.0223567	0.162623	0.746787	0.00115429	0.00158393
AKR1C2	Cytosol	Unclassified	0.00601743	0.0103713	0.981198	0.00241336	0.00190373	0.00133689	0.0011968	0.00158001	0.00183876	0.00166852	0.0018329	0.00503115	0.0179213	0.025916	0.0366296	0.184288	0.716443	0.00102403	0.00138933
AKR1C3	Cytosol	Unclassified	0.00620379	0.00969624	0.981618	0.00248156	0.00198911	0.00137128	0.00121784	0.00162557	0.00189277	0.00169336	0.00188408	0.00422604	0.019807	0.0264334	0.031356	0.20084	0.703182	0.00104393	0.00143762
AKR7A2	Cytosol	C2	0.00343453	0.00536443	0.989562	0.00163878	0.000887073	0.0007323	0.000731787	0.00108337	0.000791421	0.00119583	0.00113762	0.00223955	0.190591	0.695878	0.034842	0.00929839	0.0589524	0.00070701	0.000931768
AKT1	Cytosol	Unclassified	0.00278741	0.00304399	0.992886	0.00128261	0.000774317	0.000607657	0.000594776	0.000810661	0.000756836	0.000765825	0.000814267	0.000707059	0.503956	0.0530641	0.382554	0.0391883	0.0141233	0.000542823	0.000739787
AKT1S1	Cytosol	Unclassified	0.00393841	0.00441909	0.989904	0.00173818	0.00110593	0.000877609	0.000826239	0.00112863	0.00106663	0.00111039	0.00119513	0.00104694	0.533021	0.152521	0.224586	0.039596	0.0401799	0.000743419	0.000994761
AKTIP	Cytosol	Unclassified	0.00461034	0.00526778	0.988021	0.0021009	0.00127101	0.000981776	0.000972007	0.00138555	0.00128619	0.00122302	0.00136773	0.00139084	0.347339	0.0632671	0.409849	0.0608323	0.106734	0.00085343	0.00124747
ALAD	Cytosol	Unclassified	0.00745975	0.00989295	0.979391	0.00325663	0.00212938	0.00162636	0.0015303	0.00217371	0.00223373	0.00208425	0.00228409	0.00329088	0.0987723	0.13139	0.111831	0.0992847	0.538113	0.0013567	0.00189993
ALB	Cytosol	Unclassified	0.0150252	0.0188975	0.960828	0.00524976	0.00502278	0.00354601	0.00280882	0.00364756	0.00452548	0.00376681	0.00490401	0.00570119	0.0327501	0.0187906	0.0816717	0.637938	0.189677	0.00201802	0.00323174
ALCAM	Secretory	Unclassified	0.979292	0.00285783	0.00324957	0.0146009	0.48132	0.190933	0.0605699	0.246469	0.000651536	0.000832083	0.000706601	0.000667612	0.000614426	0.000655645	0.000683293	0.000632466	0.000663742	0.0124131	0.00218772
ALDH16A1	Cytosol	C1	0.014915	0.0200122	0.960421	0.00465167	0.00531802	0.00345914	0.00269674	0.00344105	0.00751634	0.00330841	0.00452213	0.00466532	0.846238	0.0475307	0.0298979	0.0120213	0.0247332	0.0017607	0.00289096
ALDH18A1	Mitochondria	M1	0.0274115	0.0241692	0.00751236	0.940907	0.00133958	0.00315329	0.0172347	0.00568393	0.00140806	0.0080869	0.00923241	0.00544181	0.00147188	0.00160555	0.00150665	0.00142891	0.00149937	0.89978	0.0411274
ALDH1A2	Cytosol	C4	0.00819547	0.010049	0.978748	0.00300771	0.00270099	0.00188046	0.00157116	0.00204286	0.00247787	0.00210479	0.00254932	0.00291707	0.0228918	0.0162065	0.0623112	0.740821	0.136517	0.00120434	0.00180337
ALDH1A3	Cytosol	Unclassified	0.00444094	0.00527557	0.98839	0.00189375	0.00135048	0.000973856	0.000902517	0.00121408	0.00133562	0.00122932	0.00131086	0.00139977	0.0331618	0.0129676	0.286924	0.46623	0.189106	0.000819602	0.00107415
ALDH1B1	Mitochondria	M1	0.0627362	0.156415	0.0353328	0.745516	0.00980698	0.0146097	0.0215785	0.0167411	0.0109155	0.0234155	0.0422972	0.0797867	0.00738606	0.00675298	0.00553398	0.00669311	0.00896671	0.715371	0.030145
ALDH1L2	Mitochondria	M1	0.0706018	0.194999	0.0421437	0.692255	0.0103456	0.0141675	0.0258502	0.0202386	0.00985473	0.0310387	0.0278299	0.126276	0.00916257	0.00935658	0.0064442	0.00719439	0.00998593	0.650667	0.0415887
ALDH2	Mitochondria	Unclassified	0.0605997	0.258672	0.0401396	0.640588	0.0105421	0.012327	0.020331	0.0173996	0.011173	0.0309438	0.0339506	0.182605	0.00851063	0.00823056	0.00605442	0.00725347	0.0100905	0.616386	0.0242027
ALDH3A1	Cytosol	Unclassified	0.00276772	0.00398539	0.992059	0.00118816	0.000828666	0.000612795	0.000573133	0.000753128	0.000820272	0.000796969	0.000810858	0.00155729	0.0190282	0.0178926	0.105747	0.188971	0.66042	0.000542452	0.000645706
ALDH3A2	Secretory	S2	0.985864	0.00268125	0.00315837	0.00829667	0.0434364	0.742112	0.128275	0.0720398	0.000748088	0.000692849	0.000589441	0.00065087	0.000596261	0.000650821	0.000636857	0.000619438	0.000654995	0.00533217	0.0029645
ALDH3B1	Secretory	Unclassified	0.984936	0.00241029	0.00250543	0.0101481	0.511347	0.126002	0.184989	0.162599	0.000638734	0.000729967	0.00058926	0.000452331	0.000553028	0.00047252	0.000495766	0.000492962	0.000491158	0.009434	0.000714095
ALDH4A1	Mitochondria	Unclassified	0.0731275	0.351537	0.0432248	0.532111	0.0120877	0.0151094	0.0285237	0.0174066	0.013436	0.0258034	0.0359452	0.276352	0.00892871	0.00806397	0.00643996	0.00786351	0.0119286	0.509702	0.0224089
ALDH5A1	Mitochondria	M1	0.0600394	0.149682	0.0362137	0.754065	0.0101617	0.0126629	0.0203288	0.016886	0.0107369	0.0236701	0.0326477	0.082627	0.00757688	0.00707899	0.00573311	0.00679665	0.00902806	0.724196	0.0298691
ALDH7A1	Cytosol	Unclassified	0.0473574	0.10921	0.825559	0.017873	0.0162262	0.0110166	0.00844137	0.0116733	0.0129212	0.014354	0.0168641	0.0650709	0.329612	0.381926	0.0345662	0.0344521	0.0450028	0.00767364	0.0101993
ALDH9A1	Cytosol	Unclassified	0.0161241	0.0283907	0.94842	0.00706492	0.00500783	0.00354926	0.00302793	0.00453904	0.00365326	0.00522532	0.00583337	0.0136787	0.316885	0.549519	0.0304129	0.0224106	0.0291929	0.00302187	0.00404305
ALDOC	Cytosol	Unclassified	0.00420795	0.00553693	0.988475	0.00177976	0.00129143	0.000935546	0.000853206	0.00112776	0.00125582	0.00118639	0.00124049	0.00185422	0.0230684	0.022043	0.117463	0.497745	0.328156	0.000780528	0.000999228
ALG1	Secretory	Unclassified	0.886636	0.00671647	0.00311113	0.103536	0.0213836	0.0945995	0.737527	0.0331261	0.00151676	0.0026413	0.00168	0.000878408	0.000572015	0.000625754	0.000663956	0.000632236	0.000617171	0.100242	0.00329482
ALG11	Secretory	Unclassified	0.985615	0.002194	0.00258024	0.00961076	0.0381455	0.726126	0.163927	0.0574169	0.000534688	0.000615732	0.000549624	0.000493952	0.000448987	0.000509583	0.000544334	0.000544697	0.000532642	0.00724711	0.00236365
ALG12	Secretory	Unclassified	0.980299	0.00551069	0.00422889	0.00996149	0.0137182	0.629234	0.291206	0.0461412	0.00170595	0.00140758	0.00137225	0.00102491	0.00101801	0.000841843	0.00076937	0.000759111	0.000840562	0.00517391	0.00478757
ALG2	Secretory	Unclassified	0.973545	0.00213575	0.00247739	0.0218421	0.125332	0.52124	0.234583	0.0923888	0.000451722	0.000742896	0.000569899	0.000371237	0.000481578	0.000485887	0.000509958	0.000520997	0.000478972	0.0168074	0.00503476
ALG3	Secretory	Unclassified	0.909317	0.028625	0.0153434	0.0467147	0.0509704	0.608491	0.079706	0.170149	0.00841839	0.00731908	0.00889623	0.00399135	0.00387434	0.00291696	0.00245267	0.00274385	0.00335556	0.00620692	0.0405078
ALG5	Secretory	S2	0.987047	0.0021903	0.00240101	0.00836139	0.0129717	0.742156	0.190647	0.041272	0.000642249	0.000569169	0.000516619	0.000462261	0.000431837	0.00049465	0.00050647	0.000485985	0.000482065	0.00574	0.00262139
ALG6	Secretory	Unclassified	0.97108	0.00199778	0.00230816	0.0246139	0.0811719	0.607775	0.215251	0.0668816	0.000387385	0.000636452	0.000535673	0.000438272	0.000432194	0.000438574	0.000483615	0.000499853	0.000453922	0.0175134	0.00710048
ALG8	Secretory	Unclassified	0.980668	0.00262848	0.00235436	0.0143488	0.130417	0.478162	0.301809	0.0702811	0.000602612	0.000877236	0.000728336	0.0004203	0.000446529	0.000451843	0.00048672	0.000498138	0.000471129	0.0129092	0.00143958
ALKBH1	Unclassified	Unclassified	0.106915	0.389033	0.0603824	0.443669	0.0165409	0.0181807	0.0472543	0.0249393	0.0168894	0.0690202	0.064405	0.238719	0.0128483	0.012119	0.00925007	0.0105733	0.0155917	0.393506	0.050163
ALKBH2	Nuclear	N1	0.0573674	0.870607	0.0562295	0.0157961	0.022124	0.0129167	0.00919482	0.0131319	0.798375	0.0210775	0.0305451	0.0206096	0.0118604	0.00912952	0.0081644	0.0106498	0.0164254	0.00551421	0.0102819
ALKBH3	Cytosol	Unclassified	0.00566048	0.00649219	0.985497	0.00235083	0.00175141	0.00120382	0.00111538	0.00158987	0.00152647	0.00155302	0.00169541	0.00171729	0.260683	0.0330571	0.580452	0.0725966	0.0387078	0.000942854	0.00140798
ALKBH5	Nuclear	N4	0.00775868	0.974577	0.0151154	0.0025485	0.00249749	0.0017714	0.00146141	0.00202838	0.00366254	0.00419968	0.00272169	0.963993	0.00206748	0.00542968	0.00151159	0.00178676	0.0043199	0.00107599	0.00147251
ALKBH6	Cytosol	Unclassified	0.003847	0.00463058	0.989868	0.00165413	0.00116462	0.00084803	0.000787547	0.0010468	0.00115261	0.00108778	0.00112595	0.00126424	0.0301201	0.0129146	0.25199	0.504601	0.190242	0.000726952	0.000927179
ALKBH7	Mitochondria	M1	0.0440118	0.0481771	0.0201298	0.887681	0.00512049	0.00750803	0.0195622	0.0118211	0.00460139	0.00973461	0.0186609	0.0151802	0.0040275	0.00376894	0.00371539	0.00383117	0.00478682	0.762616	0.125066
ALKBH8	Cytosol	Unclassified	0.00541759	0.00688479	0.985471	0.00222626	0.00169625	0.00121134	0.00108106	0.00142894	0.00162884	0.00150967	0.00162681	0.00211947	0.0241254	0.0181564	0.10657	0.567338	0.269282	0.00095753	0.00126873
ALMS1	Cytosol	Unclassified	0.0860577	0.044243	0.829014	0.0406855	0.0225097	0.0169802	0.0197125	0.0268552	0.0092616	0.00903347	0.0161674	0.00978049	0.435491	0.274818	0.0455167	0.0163585	0.0568295	0.00720965	0.0334759
ALPI	Secretory	Unclassified	0.975412	0.00598104	0.00625052	0.0123569	0.554951	0.0739171	0.158971	0.187572	0.00156695	0.00156372	0.0015428	0.00130758	0.00146426	0.00113468	0.00117128	0.0011876	0.0012927	0.00873949	0.00361742
ALPL	Secretory	Unclassified	0.978256	0.00644009	0.00541192	0.00989209	0.453126	0.129218	0.0664799	0.329432	0.00164957	0.00173252	0.00177204	0.00128596	0.00114194	0.00104476	0.00103425	0.00102544	0.00116553	0.00879365	0.00109844
ALPP	Secretory	Unclassified	0.961789	0.00934991	0.00795408	0.020907	0.540404	0.0706148	0.165838	0.184933	0.00295409	0.00226986	0.00238416	0.00174181	0.00190463	0.00142226	0.00143827	0.00150826	0.00168067	0.0181003	0.0028067
ALS2	Cytosol	Unclassified	0.003356	0.00378876	0.991357	0.00149855	0.000944772	0.000737842	0.000707956	0.000965435	0.000971572	0.000915781	0.000984456	0.000916954	0.247312	0.012735	0.63834	0.0797838	0.0131855	0.000627047	0.000871499
ALS2CL	Cytosol	C1	0.00766862	0.00605311	0.982331	0.00394742	0.00222652	0.0015003	0.00190182	0.00203997	0.00152592	0.00134842	0.00186356	0.00131521	0.680274	0.199549	0.0695261	0.0184959	0.0144864	0.00103622	0.00291121
ALYREF	Nuclear	Unclassified	0.0481307	0.933844	0.00919635	0.00882846	0.0134432	0.0124323	0.00889532	0.0133599	0.207902	0.0569742	0.666472	0.00249535	0.00195522	0.00176916	0.00177444	0.00177938	0.00191815	0.00566372	0.00316474
AMACR	Secretory	Unclassified	0.730019	0.0935642	0.0214521	0.154965	0.0416582	0.0427337	0.569447	0.0761803	0.0104083	0.0265514	0.0111969	0.0454076	0.0056684	0.00468127	0.00331153	0.00320208	0.00458878	0.136479	0.0184855
AMBRA1	Nuclear	N4	0.0156959	0.831069	0.148447	0.00478736	0.00419183	0.00281631	0.00287502	0.00581269	0.0120902	0.00747889	0.00466571	0.806835	0.0143362	0.107872	0.00507906	0.00335216	0.0178077	0.00195385	0.00283352
AMD1	Cytosol	Unclassified	0.0173222	0.041622	0.93487	0.00618612	0.00558015	0.00412066	0.00335851	0.00426292	0.00534479	0.00459412	0.005624	0.026059	0.015147	0.0667036	0.0222117	0.119415	0.711392	0.00240637	0.00377975
AMFR	Secretory	Unclassified	0.985405	0.00264171	0.00290801	0.00904526	0.191077	0.505952	0.190616	0.0977606	0.000686271	0.000683157	0.000691182	0.000581098	0.000544844	0.000561133	0.000598696	0.000597864	0.000605468	0.00804833	0.000996931
AMIGO1	Secretory	Unclassified	0.97946	0.00234113	0.00248792	0.0157108	0.434836	0.167885	0.107977	0.268762	0.000544088	0.000673099	0.000648592	0.000475351	0.000458678	0.000511411	0.000537483	0.000488705	0.000491642	0.0147042	0.00100661
AMIGO2	Secretory	Unclassified	0.984451	0.00327922	0.00346533	0.00880453	0.496027	0.0975088	0.0953536	0.295562	0.000631809	0.00103308	0.000914558	0.000699768	0.000688324	0.000679068	0.000710146	0.000675553	0.000712244	0.00778809	0.00101644
AMMECR1	Cytosol	Unclassified	0.00642943	0.012667	0.978266	0.00263746	0.00186645	0.00152049	0.00135225	0.00169024	0.00178451	0.00179097	0.00197571	0.00711585	0.0716761	0.102012	0.0560472	0.0582041	0.690327	0.00117572	0.00146174
AMMECR1L	Nuclear	N4	0.00944048	0.876551	0.11028	0.00372884	0.00285375	0.00205448	0.00204936	0.0024829	0.00283108	0.00385123	0.00324912	0.86662	0.00506787	0.0374493	0.00272786	0.00330189	0.0617328	0.00162997	0.00209887
AMN1	Cytosol	Unclassified	0.00399021	0.00457146	0.989716	0.00172274	0.00116292	0.000887721	0.000839297	0.00110028	0.00115043	0.00109596	0.00116299	0.00116208	0.136295	0.0176123	0.620746	0.12912	0.0859424	0.000749893	0.000972847
AMOTL1	Secretory	Unclassified	0.584519	0.0178681	0.00720521	0.390408	0.0162224	0.0348474	0.492491	0.0409574	0.00199025	0.0078982	0.00414682	0.00383287	0.00144004	0.00147842	0.00143743	0.00138773	0.00146159	0.371281	0.0191276
AMOTL2	Cytosol	C2	0.00978252	0.0210715	0.964463	0.00468329	0.00278807	0.00217715	0.00201343	0.00280387	0.00222193	0.0028733	0.00302527	0.012951	0.18437	0.661968	0.0383374	0.0103031	0.069485	0.00185916	0.00282413
AMPD1	Nuclear	N3	0.0184986	0.955351	0.0156876	0.0104626	0.00452478	0.00376943	0.00305312	0.00715127	0.0155678	0.138796	0.796597	0.0043902	0.00303903	0.00307255	0.00254291	0.00346588	0.0035672	0.00454963	0.00591297
AMPD2	Cytosol	Unclassified	0.00576436	0.00743701	0.984451	0.00234718	0.00179603	0.00131563	0.00116045	0.00149225	0.00169807	0.001573	0.00171772	0.00244822	0.0248656	0.0234897	0.103942	0.520465	0.311689	0.00100804	0.00133915
ANAPC1	Unclassified	N1	0.0980658	0.634622	0.254012	0.0133009	0.0316318	0.0147367	0.0143104	0.0373869	0.580882	0.0137309	0.0265905	0.0134183	0.191322	0.0157634	0.0127021	0.0101606	0.0240637	0.00464159	0.00865931
ANAPC10	Nuclear	N1	0.0593432	0.801387	0.127963	0.0113067	0.0196938	0.0110475	0.00939633	0.0192056	0.716594	0.0247722	0.0283466	0.0316748	0.071454	0.0127176	0.0100845	0.0101819	0.0235247	0.00411434	0.00719237
ANAPC11	Nuclear	N1	0.0699123	0.701643	0.212792	0.0156528	0.0261596	0.0146431	0.0118684	0.0172411	0.649483	0.0126567	0.0231743	0.0163289	0.139941	0.016684	0.0153588	0.0134703	0.0273378	0.0055557	0.0100971
ANAPC13	Nuclear	N1	0.0706105	0.875664	0.0460752	0.00765027	0.0354823	0.00842763	0.00856996	0.0181306	0.846477	0.00680241	0.0170077	0.00537672	0.0268053	0.00433755	0.00421529	0.0041545	0.0065625	0.00312724	0.00452303
ANAPC16	Unclassified	Unclassified	0.106852	0.333652	0.536269	0.0232268	0.0367012	0.0223028	0.0162102	0.0316375	0.230555	0.0246063	0.0398347	0.0386568	0.368632	0.037668	0.0283007	0.0260394	0.0756296	0.00793723	0.0152896
ANAPC2	Unclassified	N1	0.104914	0.586266	0.294545	0.014275	0.0337359	0.0161474	0.0177874	0.0372435	0.529452	0.0149829	0.0267882	0.0150425	0.230084	0.0172682	0.0128627	0.0096839	0.0246464	0.00500729	0.00926774
ANAPC4	Nuclear	N1	0.066531	0.709979	0.212489	0.0110002	0.021529	0.0118169	0.0111389	0.0220463	0.652382	0.0151173	0.0245955	0.017885	0.153858	0.0144385	0.0113317	0.00967026	0.0231912	0.00396606	0.00703409
ANAPC7	Nuclear	N1	0.130095	0.734835	0.123193	0.0118759	0.0480972	0.0152421	0.0224265	0.0443297	0.68163	0.0166473	0.0217274	0.0148308	0.0913815	0.00902426	0.00639813	0.00510893	0.0112806	0.00462121	0.00725466
ANGEL1	Secretory	Unclassified	0.980749	0.00370132	0.00387551	0.0116738	0.253481	0.238503	0.408291	0.0804732	0.0015544	0.000916985	0.000703865	0.000526066	0.00124317	0.000657232	0.000674412	0.000657957	0.000642737	0.0106459	0.00102793
ANGEL2	Nuclear	N4	0.026633	0.666243	0.299304	0.00782025	0.00594266	0.00415065	0.00447227	0.0120674	0.0149012	0.0170112	0.00873514	0.625595	0.0438143	0.194697	0.00969672	0.00596026	0.0451363	0.00293262	0.00488762
ANK3	Nuclear	N4	0.0968899	0.759694	0.0529183	0.090498	0.0117299	0.00979285	0.0340613	0.0413058	0.00936682	0.0646433	0.0226234	0.66306	0.0114882	0.0204418	0.00512849	0.00441234	0.0114475	0.052139	0.038359
ANKFY1	Cytosol	Unclassified	0.005981	0.0109778	0.980478	0.00256368	0.00170078	0.00139484	0.00128719	0.00159819	0.00163605	0.00161807	0.00174972	0.00597395	0.023865	0.0658628	0.0873753	0.0581952	0.745179	0.00113926	0.00142442
ANKH	Secretory	Unclassified	0.988869	0.00295461	0.00279024	0.00538645	0.506786	0.10368	0.105714	0.272689	0.000836736	0.000831623	0.000739743	0.000546505	0.000624698	0.000542946	0.00054147	0.000524708	0.000556413	0.00498152	0.00040493
ANKHD1	Cytosol	C2	0.0052238	0.0074358	0.984928	0.00241273	0.00140787	0.00115035	0.00115363	0.00151195	0.00148714	0.00160719	0.00158416	0.00275732	0.0496662	0.688009	0.0275781	0.0089548	0.210719	0.00105088	0.00136185
ANKLE2	Secretory	Unclassified	0.977505	0.00267745	0.00378318	0.0160348	0.26963	0.391936	0.19995	0.115989	0.000622035	0.000843068	0.000710032	0.000502313	0.000906163	0.000752631	0.000730373	0.000714698	0.00067931	0.00901996	0.0070148
ANKMY2	Cytosol	Unclassified	0.00352235	0.00400351	0.99095	0.00152447	0.00103941	0.000770239	0.00072677	0.000985936	0.00100291	0.000969754	0.00101669	0.00101415	0.177003	0.0104537	0.686848	0.100782	0.0158625	0.000654322	0.000870146
ANKRA2	Nuclear	Unclassified	0.0188653	0.95176	0.0155747	0.0138003	0.00230043	0.00271367	0.0052505	0.00860067	0.0412609	0.771318	0.0949952	0.0441856	0.00373169	0.00464156	0.00217508	0.00211214	0.00291419	0.00757391	0.00622638
ANKRD11	Nuclear	N2	0.00439073	0.987653	0.00577215	0.00218444	0.00132351	0.000992025	0.000902814	0.00117238	0.0171237	0.930207	0.0200796	0.020242	0.00106166	0.00100829	0.00118484	0.00113348	0.00138387	0.00115987	0.00102457
ANKRD12	Nuclear	N4	0.014386	0.960138	0.0203496	0.0051265	0.00445978	0.00319567	0.00302257	0.00370795	0.0202672	0.195495	0.00666949	0.737707	0.00399461	0.00356775	0.00286791	0.00318386	0.00673549	0.00219727	0.00292923
ANKRD13A	Cytosol	C1	0.00477354	0.00449956	0.988505	0.0022214	0.00139199	0.00100513	0.00104035	0.00133607	0.00111024	0.0010995	0.0012514	0.00103843	0.698626	0.212004	0.055887	0.0128882	0.00910096	0.000788588	0.00143281
ANKRD13B	Cytosol	C1	0.0524143	0.0927684	0.842612	0.0122058	0.0222469	0.0109323	0.009072	0.0101631	0.0584242	0.00878834	0.0134039	0.012152	0.691557	0.0664066	0.0359647	0.0172578	0.0314259	0.00435672	0.00784904
ANKRD17	Cytosol	Unclassified	0.0583565	0.12972	0.79842	0.013504	0.0230587	0.0113192	0.00937264	0.014606	0.0720727	0.0120149	0.0140812	0.0315508	0.557015	0.0937085	0.0274702	0.0173183	0.102908	0.00512525	0.00837874
ANKRD26	Cytosol	Unclassified	0.0328182	0.0504557	0.897758	0.0189684	0.00907337	0.00640371	0.0059113	0.0114299	0.00485455	0.00691349	0.0100539	0.0286338	0.196586	0.577606	0.0307851	0.0116862	0.0810943	0.00622704	0.0127414
ANKRD27	Secretory	Unclassified	0.799205	0.0819995	0.102467	0.0163288	0.490239	0.0457574	0.156477	0.106731	0.0598762	0.00764314	0.00735323	0.00712693	0.0728465	0.00965713	0.00633495	0.00523312	0.00839515	0.00780918	0.00851959
ANKRD28	Cytosol	C1	0.0040335	0.00424475	0.989731	0.00199044	0.00112244	0.000860904	0.000898132	0.00115202	0.00104687	0.00101826	0.00121572	0.000963897	0.782591	0.117924	0.0642888	0.0146882	0.0102397	0.000707833	0.00128261
ANKRD30B	Nuclear	N1	0.142835	0.678179	0.143013	0.0359735	0.0554181	0.0355085	0.0225619	0.0293461	0.538974	0.0304785	0.0571902	0.0515362	0.0283432	0.0207981	0.0188828	0.0276276	0.0473611	0.0115833	0.0243902
ANKRD40	Cytosol	C2	0.00497217	0.00785789	0.984832	0.00233819	0.00137213	0.00113246	0.00110131	0.00136628	0.00136329	0.00152091	0.00155824	0.00341545	0.030556	0.746224	0.0245403	0.00719813	0.176313	0.00105207	0.00128612
ANKRD44	Cytosol	C1	0.00400214	0.00476604	0.989398	0.00183409	0.00111752	0.000892828	0.000813512	0.00117828	0.00115985	0.00118549	0.00126048	0.00116024	0.75085	0.0276642	0.183672	0.0213694	0.00584162	0.000752147	0.00108194
ANKRD46	Secretory	Unclassified	0.962864	0.0154986	0.00842578	0.0132119	0.304475	0.410336	0.0578027	0.19025	0.0041918	0.0063226	0.00280834	0.0021759	0.00221769	0.00163046	0.00138147	0.00145551	0.00174065	0.00649207	0.00671978
ANKRD49	Cytosol	C4	0.0156127	0.0197884	0.959258	0.00534138	0.00544003	0.00357536	0.00281968	0.00377764	0.0048249	0.00382529	0.00511253	0.00602565	0.0245552	0.0172105	0.0587481	0.733319	0.125425	0.00198763	0.00335375
ANKRD50	Cytosol	C2	0.00458326	0.0052456	0.988094	0.00207761	0.00129869	0.000974525	0.00096388	0.00134616	0.00121813	0.00123509	0.00123717	0.00155521	0.188725	0.698887	0.0296319	0.00536715	0.0654829	0.000842611	0.001235
ANKRD52	Cytosol	Unclassified	0.00286817	0.00314491	0.992656	0.00133084	0.000790435	0.000634337	0.000618005	0.00082539	0.000783299	0.000788698	0.000858189	0.00071472	0.547688	0.0345662	0.359676	0.0332595	0.0174666	0.000558748	0.000772096
ANKRD54	Unclassified	Unclassified	0.0136215	0.53963	0.441766	0.00498308	0.00405451	0.00301248	0.00281738	0.00373714	0.0033676	0.00452295	0.0042197	0.527519	0.0433881	0.139123	0.014573	0.0106592	0.234023	0.00206067	0.00292241
ANKRD9	Cytosol	Unclassified	0.0135177	0.022296	0.958855	0.00533127	0.00414757	0.00315917	0.00273829	0.00347265	0.00392071	0.00364396	0.00425842	0.0104729	0.0257013	0.144973	0.070868	0.118393	0.59892	0.0022429	0.00308837
ANKS1A	Cytosol	Unclassified	0.00667148	0.00815362	0.982465	0.00270968	0.00211034	0.00144146	0.00129023	0.00182945	0.0019787	0.00178131	0.00202458	0.00236904	0.121917	0.0147667	0.607731	0.222148	0.0159026	0.00107734	0.00163233
ANKS1B	Cytosol	Unclassified	0.0121844	0.0145529	0.968522	0.00474056	0.00375425	0.00289125	0.00246164	0.00307722	0.00356993	0.00318462	0.00376113	0.00403718	0.0508416	0.0316594	0.460745	0.198059	0.227218	0.00195592	0.00278464
ANKS3	Cytosol	Unclassified	0.00324873	0.00357186	0.991655	0.00152414	0.000885734	0.000685069	0.000713624	0.000964297	0.000875122	0.000868767	0.00101363	0.000814341	0.633286	0.0770741	0.194967	0.0382181	0.0481101	0.00059653	0.000927609
ANKS6	Cytosol	Unclassified	0.00299453	0.00330162	0.992286	0.00141749	0.000815036	0.000626771	0.000654224	0.000898498	0.000862285	0.000814839	0.000947137	0.000677358	0.555797	0.0379105	0.313358	0.0513117	0.0339091	0.000555671	0.000861819
ANKZF1	Cytosol	Unclassified	0.0331445	0.045815	0.912128	0.00891295	0.0113967	0.00694367	0.00542221	0.00938187	0.0145198	0.00763457	0.00845212	0.0152084	0.520404	0.233046	0.04409	0.0167097	0.0978775	0.00336325	0.0055497
ANLN	Nuclear	N4	0.0116474	0.950054	0.0341704	0.0041278	0.0036792	0.00267021	0.00248642	0.00281161	0.00289615	0.00421387	0.00385103	0.939093	0.00384979	0.0104767	0.00245343	0.00275913	0.0146313	0.00177362	0.00235418
ANO10	Secretory	S2	0.979112	0.00802232	0.00533291	0.00753267	0.0199393	0.759262	0.148394	0.0515167	0.00292288	0.00244115	0.00133242	0.00132588	0.00117524	0.0010958	0.000973191	0.00097579	0.00111289	0.00469719	0.00283549
ANO6	Secretory	Unclassified	0.987422	0.00268687	0.00287315	0.00701811	0.538458	0.113607	0.144886	0.190471	0.00071474	0.000770735	0.00069783	0.00050357	0.000698121	0.000529191	0.000550253	0.000542079	0.000553508	0.00622466	0.00079345
ANO8	Secretory	Unclassified	0.91922	0.0073475	0.00416373	0.0692686	0.0159218	0.133361	0.731082	0.038855	0.00167784	0.00257326	0.00198274	0.00111367	0.000813879	0.00084132	0.000869261	0.000811103	0.000828163	0.0652042	0.00406445
ANOS1	Nuclear	N1	0.0525362	0.930013	0.0126179	0.00483314	0.0337839	0.00542883	0.00517344	0.00815001	0.909958	0.00538929	0.011328	0.00333716	0.00339014	0.00206583	0.00194716	0.00229131	0.00292349	0.00237004	0.0024631
ANP32E	Cytosol	Unclassified	0.0344996	0.271608	0.682247	0.0116458	0.0112349	0.00831091	0.00665957	0.00829416	0.0107458	0.0086903	0.0112738	0.240898	0.0204599	0.0233092	0.0156037	0.0326675	0.590207	0.00444141	0.00720442
ANPEP	Secretory	Unclassified	0.97803	0.00701662	0.00687115	0.00808264	0.540963	0.097214	0.16726	0.172593	0.00234185	0.00163367	0.00177233	0.00126878	0.00196695	0.00120519	0.00120098	0.00118715	0.00131088	0.00594504	0.0021376
ANTXR1	Secretory	Unclassified	0.976684	0.00280879	0.00263975	0.0178678	0.456365	0.137112	0.124082	0.259125	0.000697264	0.000834682	0.000763298	0.000513551	0.000492795	0.000526728	0.000570095	0.000523207	0.000526927	0.0171886	0.000679216
ANTXR2	Secretory	Unclassified	0.9789	0.00510799	0.00545173	0.01054	0.457061	0.110549	0.045635	0.365656	0.00116973	0.00137933	0.00123727	0.00132166	0.00108911	0.00110493	0.00103421	0.00103036	0.00119311	0.00897313	0.00156684
ANXA1	Cytosol	Unclassified	0.00555836	0.00825276	0.98394	0.00224848	0.00172245	0.00126528	0.00111999	0.00145065	0.00165409	0.00153217	0.00169035	0.00337616	0.0192151	0.024362	0.0438383	0.253015	0.64351	0.000966187	0.00128229
ANXA10	Cytosol	Unclassified	0.00547916	0.00683664	0.985492	0.00219245	0.00175995	0.00121753	0.00107502	0.00142666	0.00161883	0.00147909	0.0016467	0.00209203	0.021511	0.0161798	0.0737929	0.700756	0.173252	0.000923431	0.00126902
ANXA2	Cytosol	Unclassified	0.00759579	0.0133884	0.975804	0.0032116	0.00218088	0.00175488	0.00160208	0.00205794	0.00218171	0.00211	0.00231696	0.00677975	0.0193214	0.0761315	0.0315339	0.0996563	0.749161	0.0013904	0.0018212
ANXA3	Cytosol	Unclassified	0.00840756	0.0128224	0.975658	0.00311248	0.00281114	0.00190448	0.00158264	0.0021093	0.00254418	0.00220223	0.00265464	0.00542139	0.0200001	0.0266203	0.0345557	0.247739	0.646742	0.00123497	0.00187751
ANXA4	Cytosol	Unclassified	0.00567053	0.0113172	0.980727	0.00228501	0.00178542	0.00127266	0.00113156	0.00148089	0.00172788	0.00159281	0.00175405	0.00624243	0.0118186	0.0405875	0.0224278	0.171626	0.734267	0.000974831	0.00131018
ANXA5	Cytosol	Unclassified	0.0149635	0.0204936	0.959533	0.00500988	0.0051796	0.00352462	0.00271601	0.0035433	0.00456345	0.00365926	0.00489172	0.0073792	0.0219487	0.0236274	0.0446325	0.349734	0.51959	0.00184655	0.00316332
ANXA6	Cytosol	Unclassified	0.00575396	0.00747618	0.984441	0.00232912	0.00182072	0.00128925	0.00114577	0.00149822	0.00169818	0.00156342	0.00170745	0.00250713	0.0260365	0.023756	0.0974248	0.514371	0.322853	0.000989278	0.00133984
ANXA8L1	Cytosol	Unclassified	0.075286	0.0986987	0.801861	0.0241542	0.0268927	0.017589	0.0129224	0.0178819	0.0246741	0.0182895	0.0271887	0.0285465	0.0428194	0.0285721	0.0704673	0.528285	0.131717	0.00834743	0.0158068
ANXA9	Nuclear	N1	0.0374915	0.871408	0.0815936	0.00950672	0.01065	0.00642534	0.00553947	0.0148767	0.720237	0.0243921	0.0169051	0.109874	0.0222316	0.0201403	0.00706356	0.00712156	0.0250366	0.00359187	0.00591485
AOC1	Nuclear	N4	0.0152697	0.682428	0.296731	0.0055704	0.00435449	0.00315294	0.00294903	0.00481321	0.00364792	0.00503704	0.00456512	0.669178	0.0232028	0.226632	0.00890268	0.00451704	0.0334772	0.00217968	0.00339072
AOX1	Unclassified	Unclassified	0.20595	0.0852945	0.367426	0.34133	0.0364393	0.0562264	0.059538	0.0537465	0.0115061	0.0174507	0.0390149	0.0173228	0.0812227	0.174297	0.0495319	0.0313948	0.030979	0.0374293	0.3039
AP1AR	Unclassified	N1	0.356406	0.622558	0.0143283	0.00670757	0.28849	0.0344313	0.0178283	0.015657	0.601242	0.00572349	0.0114346	0.00415774	0.00334597	0.00238444	0.00246511	0.00278202	0.00335078	0.00367408	0.00303349
AP1B1	Cytosol	C1	0.0584279	0.028667	0.903624	0.00928131	0.0255831	0.00983848	0.0104714	0.012535	0.0136708	0.00405853	0.0053836	0.00555408	0.739265	0.0894545	0.0355896	0.0115663	0.0277483	0.00297092	0.00631039
AP1G1	Cytosol	C1	0.0918952	0.0529522	0.845714	0.00943882	0.0522022	0.0112714	0.0118693	0.0165523	0.0337271	0.00542392	0.00677944	0.00702177	0.727273	0.0560235	0.0269244	0.0120695	0.0234235	0.00359418	0.00584464
AP1G2	Cytosol	C1	0.00808461	0.0065264	0.982304	0.00308507	0.00262127	0.00165432	0.00171343	0.00209559	0.00180831	0.00142132	0.00171519	0.00158158	0.661882	0.251814	0.0421724	0.0115943	0.0148408	0.00100105	0.00208402
AP1M1	Cytosol	C1	0.0775787	0.0385381	0.873695	0.0101879	0.0351314	0.0126663	0.0138361	0.0159448	0.0208244	0.00491926	0.00646713	0.00632731	0.750886	0.059495	0.0291121	0.0115536	0.022649	0.00353354	0.00665435
AP1S1	Cytosol	C1	0.0228494	0.0140293	0.957628	0.00549275	0.00909777	0.00380833	0.00426233	0.00568101	0.00540302	0.00244881	0.00342928	0.00274822	0.782334	0.101109	0.039105	0.0144098	0.0206706	0.0016059	0.00388686
AP1S2	Cytosol	C1	0.0226404	0.0228959	0.947802	0.00666125	0.00842658	0.00486873	0.00405537	0.00528976	0.00643772	0.00435074	0.00567046	0.00643701	0.695607	0.160937	0.0419256	0.0158838	0.0334495	0.00243552	0.00422572
AP1S3	Cytosol	C1	0.0691339	0.0540752	0.866863	0.00992788	0.0341435	0.0112128	0.0113538	0.0124238	0.0313032	0.00608081	0.00786807	0.00882308	0.744406	0.054329	0.0245693	0.0139733	0.0295858	0.00381239	0.00611549
AP2A2	Secretory	Unclassified	0.913186	0.00456708	0.00378208	0.0784649	0.195971	0.139638	0.467675	0.109902	0.000768773	0.00194048	0.00103284	0.000824989	0.000809181	0.000743066	0.000743448	0.000732374	0.000754008	0.0752623	0.00320266
AP2M1	Secretory	Unclassified	0.923112	0.00678476	0.00536673	0.0647366	0.19395	0.120591	0.469291	0.13928	0.0014044	0.00240187	0.00174876	0.00122974	0.00105535	0.00105218	0.001084	0.00106547	0.00110974	0.0617508	0.00298577
AP3B1	Cytosol	C1	0.00332501	0.00384839	0.991221	0.00160551	0.000913565	0.000769661	0.000695157	0.000946622	0.000838718	0.001004	0.00103834	0.000967336	0.657689	0.236364	0.072029	0.00918346	0.0159556	0.000699146	0.000906361
AP3B2	Cytosol	Unclassified	0.0157107	0.0216791	0.957316	0.00529406	0.00532492	0.00377575	0.00290795	0.00370204	0.00477394	0.00390473	0.00518401	0.0078164	0.0253503	0.0266017	0.0414034	0.298137	0.565823	0.00200461	0.00328945
AP3D1	Cytosol	Unclassified	0.00287905	0.0031963	0.992486	0.0014387	0.000779922	0.000649724	0.000615151	0.000834254	0.000710853	0.000861357	0.000874381	0.000749707	0.609292	0.293337	0.06223	0.00780254	0.0198242	0.000621723	0.000816978
AP3M1	Cytosol	Unclassified	0.00502288	0.00456977	0.988163	0.00224433	0.00148311	0.00107245	0.00107392	0.0013934	0.0011226	0.00108417	0.00122093	0.00114207	0.5638	0.353616	0.0442913	0.00961052	0.016845	0.000802069	0.00144226
AP3M2	Cytosol	C1	0.00711813	0.00600875	0.983968	0.00290558	0.00215141	0.00171091	0.00150617	0.00174963	0.0016102	0.00121231	0.00173263	0.00145361	0.657484	0.229985	0.0541311	0.0118933	0.0304745	0.000931669	0.00197392
AP4B1	Cytosol	Unclassified	0.0550399	0.0245139	0.907124	0.0133221	0.0219178	0.0100535	0.0122006	0.010868	0.00783739	0.00460235	0.0062515	0.00582263	0.563826	0.237028	0.0590115	0.0177443	0.0295148	0.00337026	0.00995179
AP4E1	Cytosol	C1	0.0091841	0.00852014	0.978882	0.00341346	0.00304828	0.0020067	0.00188489	0.00224424	0.00231878	0.00181479	0.00229897	0.0020876	0.737482	0.155995	0.0570696	0.0158536	0.0124823	0.00117351	0.00223995
AP4M1	Cytosol	C1	0.0072611	0.00718246	0.98272	0.00283634	0.00231824	0.00164834	0.00147791	0.0018166	0.00185752	0.00160121	0.00192609	0.00179765	0.741002	0.163519	0.053414	0.0136507	0.0111348	0.00103878	0.00179756
AP4S1	Cytosol	C1	0.004724	0.00601921	0.987145	0.00211136	0.00136841	0.00106672	0.000924719	0.00136416	0.00148696	0.00147717	0.00162405	0.00143104	0.868386	0.0449186	0.0543328	0.0133293	0.00617919	0.000871756	0.00123961
AP5B1	Cytosol	Unclassified	0.106425	0.057469	0.819197	0.0169085	0.0475779	0.0172053	0.017646	0.0239963	0.0220706	0.00897346	0.0103621	0.0160628	0.535613	0.174396	0.0400858	0.0170435	0.0520591	0.00597417	0.0109344
AP5M1	Cytosol	Unclassified	0.0939485	0.0695939	0.820785	0.0156722	0.0403899	0.0156281	0.0159972	0.0219332	0.0303208	0.00950425	0.0108294	0.0189394	0.566191	0.146113	0.0330328	0.0157677	0.0596803	0.00572412	0.00994804
AP5Z1	Cytosol	Unclassified	0.0928539	0.036966	0.853904	0.0162762	0.0418836	0.0145351	0.0161934	0.0202418	0.0132719	0.00629211	0.00690398	0.010498	0.507342	0.237421	0.0450507	0.0144472	0.0496434	0.00508147	0.0111947
APAF1	Cytosol	Unclassified	0.0031103	0.00396647	0.991564	0.00135886	0.000915079	0.000675105	0.00064743	0.000872686	0.000915216	0.000890741	0.00092329	0.00123722	0.0306602	0.0203321	0.189274	0.270169	0.481129	0.000597453	0.000761404
APBB1	Cytosol	Unclassified	0.0288258	0.0201436	0.939074	0.011957	0.00815602	0.00580403	0.00629826	0.00856746	0.00412999	0.00423255	0.00485968	0.00692141	0.22253	0.611397	0.0432718	0.0127006	0.0491738	0.00338985	0.00856718
APBB1IP	Cytosol	Unclassified	0.0100851	0.0123785	0.973567	0.00396915	0.00334506	0.00214658	0.00191068	0.00268272	0.00308089	0.00265622	0.00311772	0.0035237	0.0791374	0.0138537	0.249925	0.499495	0.131156	0.00154568	0.00242347
APBB2	Secretory	Unclassified	0.621094	0.264462	0.0280397	0.0864043	0.0184265	0.0178613	0.546572	0.0382344	0.0183253	0.0803698	0.0204888	0.145278	0.00578876	0.00632044	0.00455481	0.00483889	0.00653677	0.0680328	0.0183715
APC	Unclassified	Unclassified	0.302675	0.243943	0.417742	0.0356398	0.107145	0.0368913	0.0594284	0.0992103	0.0651661	0.0310276	0.0178219	0.129928	0.26336	0.0753618	0.0200691	0.0132557	0.0456949	0.0150397	0.0206
APEH	Cytosol	Unclassified	0.00727737	0.00848394	0.981324	0.00291429	0.0023108	0.00156907	0.00145385	0.00194365	0.00210379	0.00187255	0.00208157	0.00242603	0.181799	0.0259355	0.354549	0.260392	0.158649	0.00118284	0.00173144
APEX1	Nuclear	N4	0.00990336	0.894091	0.0920701	0.00393513	0.00304578	0.00214424	0.00211352	0.00259983	0.00304909	0.00406923	0.00349278	0.88348	0.00373807	0.0143675	0.00223264	0.00334673	0.0683851	0.00170937	0.00222576
APEX2	Nuclear	N4	0.0186415	0.909945	0.0666709	0.00474274	0.00400213	0.00259682	0.00332395	0.00871863	0.00881666	0.0101277	0.00437046	0.88663	0.00960865	0.041433	0.00328211	0.00230174	0.0100455	0.00197064	0.0027721
APH1A	Secretory	S1	0.987076	0.00260504	0.00438636	0.0059323	0.642871	0.0856182	0.073645	0.184943	0.000544919	0.000737819	0.000636743	0.000685555	0.00106284	0.000901424	0.000822076	0.000774622	0.000825391	0.00380441	0.00212789
API5	Nuclear	N4	0.0364547	0.854528	0.0911937	0.0178241	0.00669174	0.00463358	0.00678561	0.0183437	0.00641087	0.0275716	0.01226	0.808285	0.017703	0.0484016	0.00500792	0.00360519	0.016476	0.00783164	0.00999243
APIP	Cytosol	Unclassified	0.0290413	0.0809724	0.879792	0.0101947	0.00971286	0.00675649	0.0054623	0.00710961	0.0093629	0.00780699	0.00960696	0.0541955	0.018707	0.0315827	0.0227533	0.118626	0.688122	0.00384799	0.0063467
APMAP	Secretory	Unclassified	0.95845	0.00327671	0.00282251	0.0354512	0.0375559	0.663791	0.179997	0.0771058	0.000626795	0.00118485	0.00100322	0.000461842	0.00048387	0.000559693	0.000589548	0.000624496	0.000564899	0.0201873	0.0152638
APOA1	Cytosol	C4	0.00655236	0.00809578	0.982748	0.00260345	0.00211269	0.00144663	0.00126828	0.00172477	0.00195728	0.0017759	0.00201333	0.00234928	0.0259726	0.0176172	0.110474	0.765807	0.0628781	0.00107793	0.00152552
APOB	Secretory	S1	0.97798	0.00305855	0.00418708	0.0147741	0.666329	0.0442002	0.0328703	0.234581	0.000435106	0.000965785	0.000791292	0.000866364	0.000719836	0.000833514	0.000888601	0.000847783	0.000897343	0.01017	0.00460409
APOBEC3B	Nuclear	Unclassified	0.0312648	0.9506	0.0111465	0.00698852	0.00667495	0.00837383	0.00493943	0.0112766	0.135857	0.0859727	0.726211	0.00255922	0.00282875	0.00200847	0.00182148	0.00211693	0.00237084	0.00307047	0.00391805
APOBEC3C	Nuclear	N1	0.0447058	0.888902	0.0599129	0.00647958	0.0116858	0.00541372	0.00635291	0.0212534	0.718863	0.0304393	0.0122077	0.127392	0.0260932	0.00994268	0.00480325	0.00385692	0.0152168	0.00277819	0.00370139
APOBR	Cytosol	Unclassified	0.0472224	0.0692951	0.871165	0.0123173	0.0183387	0.0103944	0.00758368	0.0109055	0.0257255	0.0100689	0.0188937	0.014607	0.614224	0.0959395	0.0527592	0.0331048	0.0751374	0.00440681	0.00791047
APOH	Cytosol	Unclassified	0.00435378	0.00489878	0.988684	0.00206378	0.00123323	0.000997173	0.000921064	0.00120231	0.00110824	0.0013383	0.00127059	0.00118165	0.248366	0.619392	0.0570986	0.00698908	0.0568376	0.000914237	0.00114954
APOL2	Secretory	Unclassified	0.928575	0.00585444	0.00791402	0.0576565	0.175603	0.380909	0.24855	0.123513	0.00123633	0.00199303	0.00166279	0.00096229	0.00221631	0.00164431	0.00141171	0.00133262	0.00130907	0.0142449	0.0434116
APOO	Mitochondria	M2	0.0611218	0.0309504	0.0175713	0.890357	0.0119062	0.00917045	0.00526981	0.0347754	0.00683756	0.00654613	0.0123805	0.00518612	0.00346886	0.00306999	0.00303431	0.00339006	0.00460805	0.0122507	0.878106
APOOL	Mitochondria	M2	0.0210744	0.0155996	0.00382751	0.959498	0.0039195	0.00243524	0.00334678	0.0113729	0.0013681	0.0034148	0.00992691	0.00088979	0.000572923	0.000735886	0.000787265	0.00084855	0.000882887	0.0195778	0.939921
APP	Secretory	Unclassified	0.962242	0.00419953	0.00348184	0.030077	0.15868	0.236705	0.446419	0.120438	0.00100066	0.00129784	0.00116368	0.000737356	0.000677344	0.000695492	0.000713919	0.000690507	0.000704579	0.0279896	0.00208745
APPBP2	Cytosol	Unclassified	0.00548854	0.00790986	0.984225	0.00237695	0.00154157	0.00127967	0.0011806	0.00148671	0.00151775	0.0015154	0.00164836	0.00322835	0.0503534	0.125417	0.0703357	0.0545201	0.683598	0.00104637	0.00133058
APPL1	Cytosol	Unclassified	0.00378832	0.00423567	0.990289	0.0016869	0.00106468	0.000823055	0.000795086	0.0011055	0.00109399	0.00102932	0.00112766	0.0009847	0.420066	0.0210204	0.491826	0.0489001	0.00847674	0.000685042	0.00100186
APPL2	Cytosol	Unclassified	0.00293861	0.00304347	0.99262	0.00139768	0.000809931	0.000639099	0.000608368	0.000881217	0.000731425	0.000833626	0.000833181	0.000645238	0.589323	0.215699	0.161277	0.0196412	0.00667894	0.000585561	0.000812114
APTX	Nuclear	N1	0.0172234	0.965467	0.0130396	0.00426974	0.00571356	0.00346557	0.00403435	0.0040099	0.924242	0.0175775	0.00923041	0.014417	0.00250732	0.00234248	0.00226433	0.00259413	0.00333133	0.00189267	0.00237707
AQP3	Cytosol	Unclassified	0.237608	0.040767	0.696962	0.0246628	0.130731	0.020759	0.0466778	0.0394404	0.0141755	0.00742161	0.00932474	0.00984514	0.487416	0.119439	0.0420432	0.0159346	0.0321299	0.00836048	0.0163024
AQR	Nuclear	N4	0.00635379	0.982866	0.00830619	0.00247417	0.0016289	0.00124283	0.00145019	0.00203186	0.00400272	0.0605644	0.00328267	0.915016	0.00133165	0.00219588	0.00120327	0.0012417	0.00233369	0.00115329	0.00132088
AR	Cytosol	C2	0.0224649	0.0290039	0.940334	0.00819724	0.00720093	0.00445414	0.0042966	0.00651323	0.00505038	0.00381366	0.00425651	0.0158833	0.171197	0.63081	0.0291944	0.00840486	0.100727	0.00289459	0.00530265
ARAF	Cytosol	Unclassified	0.0154671	0.0190166	0.959463	0.0060538	0.00501166	0.00330421	0.00294609	0.00420511	0.00476332	0.00388034	0.00493967	0.00543322	0.176381	0.0218741	0.56248	0.169792	0.0289352	0.00218517	0.00386863
ARAP2	Cytosol	Unclassified	0.00477279	0.00534742	0.987252	0.00262793	0.00120189	0.00105417	0.00104352	0.00147321	0.00104911	0.00123275	0.00179518	0.00127038	0.466569	0.404876	0.0523146	0.0167457	0.046747	0.000861082	0.00176685
ARC	Secretory	Unclassified	0.639291	0.189836	0.0441571	0.126716	0.0941177	0.279296	0.096588	0.169289	0.0287911	0.111592	0.0354211	0.014032	0.00913952	0.00753788	0.00725435	0.00863365	0.0115917	0.0122855	0.11443
ARCN1	Cytosol	Unclassified	0.0191219	0.01941	0.955301	0.0061673	0.00639964	0.00405126	0.00373549	0.00493548	0.00483273	0.0033224	0.00363513	0.0076197	0.265241	0.587792	0.0365585	0.0092084	0.0565009	0.00226066	0.00390664
AREG	Secretory	S1	0.961963	0.0180354	0.00818556	0.0118159	0.644762	0.131267	0.0601697	0.125765	0.00847815	0.00310057	0.00438924	0.00206748	0.00175201	0.00154566	0.00150728	0.00155287	0.00182774	0.0102339	0.00158198
AREL1	Secretory	Unclassified	0.987963	0.00296089	0.0028713	0.006205	0.0434151	0.675621	0.21881	0.0501165	0.000923163	0.000714471	0.000720304	0.000602956	0.000506204	0.000565362	0.000591139	0.000600045	0.000608553	0.00511483	0.00109017
ARF4	Cytosol	C1	0.00424217	0.00417588	0.989574	0.00200785	0.0012027	0.000945356	0.000917981	0.00117613	0.00099808	0.00104316	0.00116407	0.000970567	0.646772	0.238527	0.0813761	0.0147496	0.00814909	0.000746518	0.00126134
ARF5	Cytosol	Unclassified	0.00525831	0.00455514	0.987812	0.00237486	0.00156731	0.00114565	0.00114986	0.00139548	0.00114308	0.00107872	0.00125763	0.00107571	0.618159	0.292402	0.0540959	0.0117394	0.0114157	0.000811035	0.00156383
ARF6	Secretory	Unclassified	0.868516	0.0556981	0.0194095	0.0563762	0.0619921	0.0520312	0.674128	0.0803652	0.0127846	0.0158911	0.00521994	0.0218025	0.00663694	0.00391034	0.00270983	0.00247889	0.00367348	0.0505107	0.00586546
ARFGAP1	Cytosol	Unclassified	0.134921	0.0386289	0.787768	0.038682	0.0504969	0.0182714	0.0373325	0.0288205	0.0116819	0.0077015	0.01062	0.0086255	0.446346	0.203927	0.0792925	0.0240967	0.0341056	0.00664912	0.0320329
ARFGAP2	Cytosol	Unclassified	0.00514782	0.00611827	0.986604	0.0021295	0.00160383	0.00113275	0.00103026	0.00138097	0.00153617	0.00140582	0.00152202	0.00165427	0.0420551	0.0123442	0.33008	0.547592	0.0545329	0.000902466	0.00122703
ARFGEF2	Cytosol	C1	0.00243789	0.00271499	0.993622	0.00122509	0.000646834	0.000536102	0.000522353	0.000732602	0.000619778	0.000709811	0.000740337	0.000645059	0.712246	0.101447	0.151535	0.0146347	0.0137591	0.000517213	0.000707874
ARFGEF3	Cytosol	Unclassified	0.00443137	0.00503684	0.988279	0.00225274	0.00115677	0.00103889	0.000973332	0.00126238	0.00106472	0.001164	0.00166444	0.00114368	0.626941	0.241046	0.072665	0.022251	0.0253759	0.000806339	0.0014464
ARFIP1	Cytosol	Unclassified	0.00420655	0.0048605	0.989115	0.00181842	0.00125883	0.000896626	0.000861016	0.00119007	0.00126205	0.00114112	0.00123251	0.00122482	0.0808312	0.00988635	0.558869	0.264427	0.0751013	0.000764867	0.00105355
ARFIP2	Cytosol	Unclassified	0.00269008	0.00298608	0.992992	0.00133175	0.000713941	0.000600295	0.000582489	0.000793359	0.000672527	0.000775193	0.000814419	0.000723939	0.632506	0.217303	0.11078	0.0153111	0.0170922	0.000558845	0.000772905
ARFRP1	Secretory	Unclassified	0.986142	0.00169927	0.00247273	0.00968572	0.600624	0.0952706	0.0833263	0.206922	0.000302802	0.000587508	0.000425664	0.000383294	0.000494333	0.000500113	0.000515381	0.000483607	0.0004793	0.0067563	0.00292943
ARG2	Nuclear	Unclassified	0.107087	0.697125	0.067632	0.128156	0.0107044	0.016292	0.0256864	0.0544042	0.0110137	0.153729	0.0505047	0.481878	0.0177132	0.0227453	0.00775632	0.00709442	0.0123228	0.0859145	0.0422411
ARGLU1	Nuclear	N4	0.00982016	0.970469	0.0164151	0.0032954	0.00322869	0.00220203	0.00178906	0.00260039	0.00291238	0.00439538	0.00356868	0.959593	0.00251377	0.00571359	0.00169332	0.00220193	0.00429253	0.00142493	0.00187046
ARHGAP10	Cytosol	Unclassified	0.0776158	0.102107	0.799615	0.0206626	0.0254241	0.0124215	0.0148563	0.024914	0.0169669	0.0118425	0.010221	0.0630767	0.199628	0.437139	0.0331202	0.0138133	0.115913	0.00705481	0.0136078
ARHGAP12	Cytosol	Unclassified	0.00568507	0.00662501	0.985117	0.00257248	0.00159061	0.00121208	0.00118991	0.00169246	0.00157799	0.00152388	0.00170802	0.00181513	0.585038	0.101233	0.189921	0.025336	0.08359	0.00102349	0.00154898
ARHGAP21	Secretory	Unclassified	0.709367	0.0837479	0.0313853	0.175499	0.0464368	0.040273	0.518033	0.104625	0.00836917	0.0272302	0.0115339	0.0366146	0.00854098	0.00749727	0.00454731	0.00417966	0.00662011	0.150155	0.0253442
ARHGAP23	Secretory	Unclassified	0.676819	0.0384974	0.224062	0.0606218	0.199441	0.113335	0.259986	0.104056	0.0112567	0.00902528	0.0115252	0.00669017	0.157074	0.0301427	0.0147255	0.00844108	0.0136785	0.0154327	0.0451891
ARHGAP26	Unclassified	Unclassified	0.216036	0.180199	0.554879	0.0488862	0.0599497	0.0296623	0.045237	0.0811869	0.0529911	0.027784	0.0293144	0.0701091	0.317841	0.130791	0.0241189	0.0131475	0.0689814	0.0141766	0.0347096
ARHGAP27	Cytosol	C1	0.00995984	0.0121357	0.973974	0.00393047	0.00307241	0.00231889	0.00194994	0.0026186	0.00275196	0.00270584	0.00316923	0.0035087	0.738735	0.0447724	0.150773	0.0190004	0.0206939	0.00153607	0.00239441
ARHGAP28	Cytosol	Unclassified	0.0534983	0.0188561	0.911361	0.0162846	0.0203689	0.00741803	0.0133655	0.0123458	0.00616648	0.00364984	0.0052772	0.00376261	0.609921	0.202146	0.0565391	0.0191451	0.023609	0.00295028	0.0133343
ARHGAP29	Cytosol	Unclassified	0.00295501	0.00302129	0.992497	0.00152717	0.000777634	0.000663643	0.000656379	0.000857354	0.000677021	0.00076888	0.000875782	0.000699606	0.637398	0.249158	0.080052	0.0139275	0.0119606	0.000580861	0.00094631
ARHGAP32	Cytosol	Unclassified	0.0725058	0.0545914	0.858577	0.0143254	0.0215055	0.0118614	0.0114707	0.0276682	0.0155664	0.0113054	0.010478	0.0172416	0.479475	0.265427	0.039424	0.0130536	0.0611979	0.00436361	0.00996183
ARHGAP35	Cytosol	Unclassified	0.00312034	0.00343822	0.992044	0.00139713	0.000879412	0.000696827	0.000662759	0.000881347	0.000856702	0.000864839	0.000900832	0.000815845	0.330168	0.0255041	0.57396	0.0421709	0.0202408	0.000611651	0.000785481
ARHGAP39	Secretory	Unclassified	0.927165	0.0305362	0.010136	0.032163	0.116278	0.0670522	0.66681	0.077024	0.00915267	0.0123167	0.00434629	0.00472055	0.00368715	0.00188566	0.00143947	0.00128711	0.00183658	0.0297499	0.00241309
ARHGAP45	Cytosol	Unclassified	0.00258801	0.0028185	0.99333	0.00126398	0.000695106	0.000562433	0.000562917	0.000767554	0.000658163	0.000750799	0.000749655	0.000659884	0.454117	0.245481	0.218386	0.0185859	0.0567597	0.000551463	0.000712519
ARHGAP5	Cytosol	Unclassified	0.0026462	0.00287626	0.99323	0.00124788	0.000724313	0.000575269	0.000563481	0.000783134	0.000712975	0.000750733	0.00078599	0.000626559	0.593957	0.0572683	0.300762	0.0273871	0.0138551	0.000529294	0.000718586
ARHGDIA	Cytosol	Unclassified	0.00878711	0.0110059	0.976882	0.0033252	0.00287172	0.00200202	0.00169821	0.00221516	0.00261485	0.00228681	0.00270908	0.00339519	0.0234405	0.0189753	0.0718658	0.684437	0.178163	0.00134847	0.00197673
ARHGEF1	Cytosol	Unclassified	0.00399092	0.00451605	0.989769	0.00172396	0.00116007	0.000877069	0.000829897	0.00112389	0.0011583	0.00107114	0.00116402	0.0011226	0.234984	0.0142798	0.650249	0.0785813	0.0116751	0.000717162	0.0010068
ARHGEF12	Cytosol	C1	0.00354244	0.00351968	0.991112	0.00182624	0.000936822	0.000780481	0.000806925	0.00101821	0.000810976	0.000884944	0.00105155	0.000772208	0.647841	0.220086	0.0961379	0.0186627	0.00838423	0.000650394	0.00117585
ARHGEF16	Cytosol	Unclassified	0.00310139	0.00342734	0.992096	0.00137493	0.000873389	0.00068197	0.000661216	0.000884816	0.000898499	0.000839958	0.000899941	0.000788945	0.253847	0.0182758	0.610483	0.0793701	0.0301203	0.000592018	0.00078291
ARHGEF17	Secretory	Unclassified	0.748501	0.0183084	0.0246758	0.208515	0.100134	0.0898935	0.446996	0.111478	0.00319028	0.00611378	0.00517718	0.00382717	0.00786949	0.00566825	0.00378917	0.00302067	0.00432824	0.0642604	0.144254
ARHGEF26	Cytosol	Unclassified	0.179324	0.0793091	0.699719	0.0416481	0.0369944	0.0255093	0.0399063	0.0769142	0.0171231	0.0208614	0.0203417	0.0209829	0.382867	0.210742	0.0369979	0.0144576	0.0546549	0.0101101	0.031538
ARHGEF28	Cytosol	C1	0.00300168	0.00330379	0.992227	0.00146784	0.000815659	0.000647907	0.000639613	0.000898503	0.000810674	0.000864605	0.0009429	0.000685615	0.739696	0.0829542	0.140944	0.0226086	0.00602428	0.000585694	0.000882146
ARHGEF3	Secretory	Unclassified	0.949219	0.0110234	0.0172969	0.0224602	0.233575	0.0941645	0.503795	0.117685	0.00326109	0.00329438	0.00224834	0.00221961	0.00838998	0.00299906	0.00200478	0.00157598	0.00232714	0.0170821	0.00537808
ARHGEF39	Secretory	Unclassified	0.980285	0.00703279	0.00451148	0.00817112	0.575776	0.134894	0.148584	0.121031	0.00315892	0.0013018	0.0016374	0.000934672	0.00113861	0.000802336	0.000831192	0.000842359	0.000896985	0.00707139	0.00109973
ARHGEF4	Secretory	Unclassified	0.722899	0.0806773	0.119709	0.0767143	0.150065	0.0838278	0.391801	0.097206	0.0182983	0.0162301	0.031923	0.0142259	0.0741171	0.017353	0.0091845	0.00641832	0.012636	0.0300184	0.0466959
ARHGEF40	Secretory	Unclassified	0.954938	0.0215215	0.0139941	0.00954686	0.48674	0.0656682	0.287084	0.115445	0.0124572	0.00338951	0.00313845	0.00253637	0.00588418	0.00214538	0.00188764	0.00182098	0.00225591	0.00661068	0.00293618
ARHGEF7	Cytosol	Unclassified	0.00482642	0.00566152	0.98733	0.00218225	0.0013588	0.0011034	0.00102109	0.00134313	0.00129893	0.00137737	0.00146874	0.00151647	0.548209	0.137044	0.210167	0.0219518	0.0699582	0.000928726	0.00125353
ARID1A	Nuclear	Unclassified	0.00567757	0.984834	0.00694417	0.0025441	0.00155092	0.00122711	0.00129808	0.00160145	0.0235193	0.887178	0.0103504	0.0637869	0.0012917	0.00120099	0.00135708	0.00135031	0.00174409	0.00129527	0.00124883
ARID1B	Nuclear	Unclassified	0.00399056	0.988967	0.00503913	0.00200374	0.00104135	0.000810947	0.000969798	0.00116846	0.0145432	0.917587	0.0110579	0.0457789	0.000925849	0.000890021	0.00102883	0.000988368	0.00120606	0.00109536	0.000908374
ARID2	Nuclear	N3	0.00408783	0.99065	0.00368737	0.00157477	0.00131239	0.00070489	0.000583679	0.00148687	0.0566127	0.0630564	0.869834	0.00114656	0.000750741	0.000705644	0.000742761	0.000730727	0.000757501	0.000979247	0.000595522
ARID3A	Nuclear	N4	0.0903688	0.868615	0.0153395	0.0256769	0.00670635	0.00551203	0.0669296	0.0112209	0.00861048	0.0446046	0.00820072	0.807199	0.00279194	0.00397574	0.00226466	0.00246098	0.00384613	0.0169956	0.00868136
ARID3B	Cytosol	Unclassified	0.0311654	0.0636614	0.893817	0.0113564	0.00990425	0.00541999	0.00588808	0.00995312	0.00869478	0.00588947	0.00634889	0.0427282	0.197217	0.513355	0.0242686	0.00927281	0.149703	0.00369064	0.00766575
ARID4A	Nuclear	Unclassified	0.00347313	0.990037	0.0047298	0.00175991	0.00108441	0.000765751	0.00065673	0.000966233	0.0253881	0.819884	0.136826	0.00793899	0.000861743	0.000847537	0.00101441	0.000936255	0.00106985	0.00100599	0.000753928
ARIH1	Cytosol	C5	0.0070836	0.0135898	0.976362	0.00296478	0.0020358	0.00168885	0.00152039	0.00183856	0.00194669	0.00190707	0.00208601	0.00765005	0.0455867	0.0650215	0.0624401	0.0496933	0.75362	0.0013174	0.00164738
ARIH2	Cytosol	Unclassified	0.00392819	0.00567014	0.988674	0.00172769	0.00111255	0.000894484	0.000844176	0.00107698	0.00108121	0.00110397	0.00115994	0.00232502	0.0252858	0.0633506	0.111346	0.0987866	0.689905	0.000773202	0.000954486
ARL10	Mitochondria	M2	0.181678	0.00746707	0.00901276	0.801842	0.047789	0.0628502	0.0256814	0.0453574	0.00166089	0.00191047	0.00199484	0.00190087	0.00187507	0.00175141	0.00171577	0.00168321	0.00198731	0.0190634	0.782779
ARL13B	Secretory	Unclassified	0.960787	0.0136609	0.0112335	0.014319	0.520635	0.144558	0.0358316	0.259763	0.00360648	0.00396848	0.0031963	0.00288959	0.00260793	0.00216647	0.00191008	0.00204224	0.00250672	0.0109778	0.00334122
ARL14EP	Nuclear	N4	0.0167412	0.724046	0.253023	0.00618991	0.00486241	0.00349111	0.00307879	0.00530887	0.0040412	0.00864476	0.00678503	0.704575	0.0460223	0.153997	0.00980553	0.00771247	0.0354857	0.00250996	0.00367995
ARL16	Cytosol	Unclassified	0.0119727	0.00798452	0.975244	0.00479922	0.00405088	0.0023708	0.00261746	0.00293352	0.00214474	0.00180781	0.0021696	0.00186237	0.579364	0.305881	0.0600284	0.0162759	0.0136939	0.00138584	0.00341338
ARL2BP	Cytosol	Unclassified	0.00516482	0.00855398	0.984178	0.00210366	0.00158098	0.00118026	0.00105462	0.00134896	0.00152046	0.00144921	0.00158897	0.00399534	0.0116051	0.030653	0.0297739	0.193761	0.718384	0.000919588	0.00118407
ARL3	Cytosol	C4	0.00946942	0.0119852	0.97506	0.00348526	0.00321984	0.00209527	0.00176004	0.00239428	0.0028822	0.00244383	0.0029978	0.00366141	0.0208557	0.0169382	0.0593791	0.749055	0.128832	0.00135909	0.00212617
ARL4A	Cytosol	Unclassified	0.117494	0.0427065	0.814676	0.0251229	0.0492833	0.0196161	0.0260832	0.0225115	0.0131052	0.00813855	0.0107523	0.0107104	0.428369	0.263353	0.0619812	0.0239883	0.0369856	0.00628793	0.018835
ARL5B	Cytosol	Unclassified	0.00477788	0.00393415	0.988861	0.00242747	0.00126255	0.000926064	0.00113616	0.00145311	0.00089059	0.00100306	0.00121304	0.000827466	0.350495	0.570265	0.0415914	0.0102599	0.0162497	0.000734427	0.00169304
ARL6IP4	Nuclear	N4	0.0188257	0.902802	0.0711217	0.00725077	0.00623904	0.00393105	0.00364746	0.00500818	0.00766625	0.00609709	0.00728272	0.881756	0.00544141	0.0064975	0.00373152	0.00535611	0.0500952	0.00295947	0.0042913
ARL6IP5	Secretory	Unclassified	0.983169	0.00263839	0.00205885	0.0121342	0.0415418	0.551644	0.346686	0.0432965	0.000768004	0.000788148	0.000718392	0.00036385	0.000338409	0.000393849	0.000440011	0.000470869	0.00041571	0.01062	0.00151425
ARL6IP6	Nuclear	Unclassified	0.0330965	0.920029	0.0270863	0.0197887	0.00972282	0.00662164	0.00441341	0.0123386	0.02089	0.175042	0.714314	0.00978281	0.00527788	0.00473071	0.00427545	0.00561091	0.00719134	0.0109764	0.00881231
ARL8B	Secretory	Unclassified	0.970598	0.0137617	0.00917793	0.00646195	0.578375	0.110746	0.0942602	0.187217	0.00599602	0.00278188	0.00274661	0.00223719	0.00241491	0.00161307	0.00152861	0.00167054	0.00195079	0.00463703	0.00182492
ARMC1	Mitochondria	M2	0.00878164	0.00316797	0.00302297	0.985027	0.00193079	0.000823474	0.000831314	0.00519606	0.000622288	0.000837188	0.00111137	0.000597124	0.000470753	0.000575454	0.000651489	0.000639875	0.000685395	0.00558187	0.979446
ARMC10	Mitochondria	M2	0.05512	0.0084327	0.00787268	0.928575	0.0125344	0.0107233	0.00623692	0.0256253	0.00209679	0.00218006	0.00218381	0.00197204	0.0016838	0.00154417	0.00146027	0.00142185	0.0017626	0.00683778	0.921737
ARMC5	Cytosol	Unclassified	0.0943901	0.0690257	0.815773	0.0208107	0.0330703	0.0154563	0.0169489	0.0289145	0.0168267	0.0109081	0.00973559	0.0315553	0.320074	0.361847	0.0376277	0.0138661	0.0823589	0.00687313	0.0139376
ARMC6	Cytosol	Unclassified	0.00301803	0.0033598	0.99225	0.00137191	0.000844966	0.000666483	0.000643485	0.000863098	0.000857358	0.000837658	0.000880298	0.00078449	0.412151	0.0181143	0.500741	0.0486231	0.0126202	0.000583457	0.000788453
ARMC8	Cytosol	C1	0.0548565	0.0672072	0.867824	0.0101123	0.0201461	0.0106063	0.00891527	0.0151888	0.0356446	0.00781244	0.0110019	0.0127483	0.717294	0.0545294	0.0324356	0.0149266	0.0486385	0.00352539	0.00658688
ARMCX1	Mitochondria	M2	0.0410919	0.0105294	0.0032308	0.945148	0.0045099	0.00621566	0.00413385	0.0262325	0.00173671	0.00290523	0.00533671	0.000550758	0.00065329	0.000667749	0.000648682	0.000599335	0.000661745	0.0307593	0.914389
ARMCX2	Mitochondria	M2	0.0253657	0.00179044	0.00233367	0.97051	0.00620073	0.00327174	0.00113333	0.0147599	0.000412416	0.00051597	0.000450131	0.000411928	0.000427029	0.000455537	0.000504609	0.000461556	0.000484937	0.00563021	0.96488
ARMCX3	Mitochondria	M2	0.0840384	0.00557488	0.00360914	0.906778	0.013395	0.00950084	0.0334929	0.0276497	0.000713699	0.00230888	0.00185192	0.000700388	0.000641693	0.000710177	0.00076108	0.000738397	0.000757793	0.341611	0.565167
ARMCX4	Secretory	Unclassified	0.696857	0.0370866	0.0177569	0.2483	0.0798682	0.109842	0.379584	0.127563	0.00569882	0.0147618	0.0117436	0.00488239	0.00502669	0.00400859	0.00301127	0.00272335	0.00298697	0.156159	0.0921409
ARMCX5	Cytosol	C1	0.0677907	0.039677	0.883602	0.00893034	0.034199	0.00990005	0.0104063	0.0132853	0.0219374	0.00484319	0.00622831	0.00666816	0.757576	0.0612149	0.0280972	0.012051	0.024663	0.00327597	0.00565437
ARMCX6	Mitochondria	M2	0.0217845	0.00147932	0.00236386	0.974372	0.00756965	0.00271627	0.00161687	0.00988169	0.000318963	0.000431346	0.000330264	0.000398744	0.000411148	0.000452282	0.000510391	0.00047951	0.000510529	0.0121644	0.962208
ARMT1	Cytosol	Unclassified	0.0100478	0.0155932	0.970728	0.00363126	0.00333505	0.00233257	0.00190665	0.00247354	0.00302247	0.0026051	0.00321347	0.00675214	0.0182538	0.029199	0.0293015	0.174977	0.718996	0.00143223	0.00219902
ARNT	Nuclear	N4	0.00556552	0.977025	0.015475	0.00193458	0.0017079	0.00121639	0.00107004	0.0015712	0.00161564	0.00265121	0.00191024	0.970848	0.00177207	0.00886059	0.00112233	0.00128123	0.00243881	0.000833906	0.00110068
ARNTL	Nuclear	N4	0.00577611	0.980697	0.0113888	0.00213836	0.00164324	0.00117256	0.00116535	0.00179495	0.00173752	0.00564932	0.00233484	0.970975	0.00150473	0.00551088	0.00106071	0.00117745	0.002135	0.000931701	0.00120666
ARPC1A	Cytosol	Unclassified	0.00589388	0.00529946	0.985837	0.00296951	0.00155488	0.00113822	0.00139205	0.00180872	0.00126446	0.0013076	0.00163781	0.00108959	0.566107	0.316403	0.060649	0.0125761	0.0301019	0.0008851	0.00208441
ARPC1B	Secretory	Unclassified	0.958123	0.0199282	0.0118226	0.0101257	0.53957	0.08279	0.177313	0.158451	0.0106455	0.00306793	0.00361953	0.00259521	0.00312015	0.00202243	0.0020422	0.00214337	0.0024945	0.00679317	0.00333258
ARPC2	Cytosol	Unclassified	0.00243729	0.00265465	0.993717	0.00119126	0.000654015	0.000534342	0.0005302	0.000718731	0.000635935	0.000711992	0.000751156	0.000555572	0.629401	0.145428	0.172255	0.0209228	0.0257097	0.000506159	0.000685106
ARPC3	Cytosol	C1	0.00235425	0.00260846	0.993885	0.00115203	0.000629198	0.000508926	0.000501426	0.000714696	0.000643703	0.000695152	0.000727724	0.00054188	0.700698	0.0723365	0.187026	0.0218875	0.011937	0.000488093	0.000663934
ARPC5L	Cytosol	Unclassified	0.00373337	0.0035711	0.990814	0.00188158	0.000996385	0.000807617	0.00083758	0.00109179	0.000822171	0.000882192	0.0010915	0.000775235	0.578284	0.326628	0.0597543	0.0138402	0.0123075	0.000641833	0.00123975
ARPP19	Cytosol	Unclassified	0.0163223	0.0252146	0.952652	0.00581063	0.00540987	0.00394317	0.00307225	0.00389704	0.00496414	0.00422661	0.0053605	0.0106633	0.0322614	0.0526295	0.0419935	0.141196	0.684572	0.00229459	0.00351605
ARRB1	Cytosol	Unclassified	0.00364025	0.00555973	0.989284	0.00151625	0.00110002	0.000818517	0.0007419	0.000979812	0.00107682	0.00102855	0.00109607	0.00235829	0.0218091	0.0173702	0.103478	0.142705	0.703921	0.000676085	0.000840167
ARRB2	Cytosol	Unclassified	0.00459493	0.0056141	0.987768	0.00202319	0.00128377	0.00106457	0.000995945	0.00125065	0.00125318	0.00124575	0.00134107	0.00177409	0.0681678	0.0739297	0.24582	0.0721592	0.527691	0.000901558	0.00112163
ARRDC1	Cytosol	Unclassified	0.138554	0.115119	0.724344	0.0219835	0.0567766	0.0216682	0.0256611	0.0344476	0.0488622	0.0139991	0.0148134	0.0374439	0.470183	0.140544	0.0289741	0.0172501	0.067393	0.00827436	0.0137092
ARSA	Unclassified	Unclassified	0.1252	0.556032	0.286565	0.0322036	0.0398467	0.0188255	0.0269664	0.0395611	0.0262487	0.0187725	0.0159725	0.495038	0.0683931	0.131621	0.0154552	0.0125476	0.058548	0.0129169	0.0192866
ARSB	Unclassified	Unclassified	0.338071	0.590664	0.0298403	0.0414246	0.0170956	0.0149937	0.272841	0.0331409	0.0208349	0.0466455	0.012925	0.510258	0.00635395	0.00677434	0.00435398	0.00480371	0.00755432	0.0285228	0.0129017
ARSK	Nuclear	N4	0.0953722	0.848226	0.0349905	0.021411	0.0108977	0.00684157	0.0475384	0.0300946	0.0122267	0.0297422	0.00955022	0.796707	0.00788264	0.0124001	0.00352275	0.00321588	0.00796913	0.0123185	0.00909246
ARV1	Unclassified	Unclassified	0.450186	0.257766	0.196075	0.0959741	0.28425	0.0724835	0.0343397	0.0591124	0.0745838	0.0427989	0.07848	0.0619029	0.0418457	0.0305457	0.0258146	0.0382228	0.059646	0.0188918	0.0770823
ARVCF	Secretory	Unclassified	0.983864	0.00215071	0.00247096	0.0115146	0.552776	0.0994007	0.118014	0.213673	0.000487472	0.000654149	0.000565801	0.000443285	0.000516599	0.000471393	0.00050675	0.000489178	0.000487042	0.0101827	0.00133195
AS3MT	Cytosol	Unclassified	0.00260254	0.00285092	0.993365	0.00118174	0.000725339	0.000570533	0.000556806	0.000749866	0.000726474	0.000719708	0.000743118	0.000661615	0.260263	0.0207468	0.616787	0.0599669	0.0356006	0.000522679	0.000659066
ASAH1	Secretory	Unclassified	0.734075	0.196733	0.0400659	0.0291262	0.0720924	0.0532051	0.549813	0.058964	0.0465888	0.0184718	0.010676	0.120996	0.0103477	0.00713375	0.00608471	0.00681689	0.00968283	0.0199303	0.00919591
ASAP1	Cytosol	C1	0.00284864	0.00311838	0.992651	0.00138216	0.000763195	0.000643342	0.000596358	0.000845742	0.000700859	0.000823006	0.000863149	0.000731365	0.65938	0.193135	0.117833	0.013482	0.00882105	0.000584799	0.000797362
ASAP2	Cytosol	C1	0.00247075	0.00273107	0.993572	0.00122575	0.000651326	0.0005486	0.000527716	0.000743106	0.000632481	0.000715503	0.000758427	0.000624662	0.69464	0.116769	0.154035	0.0182451	0.00988293	0.000515185	0.000710564
ASAP3	Cytosol	Unclassified	0.00500792	0.00567108	0.987107	0.00221354	0.00143507	0.00108303	0.00106873	0.0014211	0.00144916	0.00132396	0.00155177	0.00134619	0.516841	0.0461095	0.356975	0.0568892	0.0102924	0.000840325	0.00137322
ASB14	Cytosol	C1	0.002913	0.00343717	0.99219	0.00146032	0.000760954	0.000630989	0.000643837	0.000877225	0.000871733	0.000859386	0.00100285	0.000703201	0.728403	0.0957848	0.113344	0.0259897	0.0286683	0.000583697	0.000876624
ASB6	Cytosol	Unclassified	0.00306112	0.003924	0.991652	0.00136242	0.000866107	0.00069676	0.000655551	0.000842702	0.000828717	0.000863558	0.000895521	0.00133621	0.04913	0.0379513	0.242054	0.097475	0.565042	0.000623713	0.000738709
ASB7	Nuclear	N4	0.017717	0.792217	0.183675	0.00639077	0.00492111	0.00335342	0.00326078	0.00618167	0.00639318	0.0102142	0.00708911	0.768521	0.0250761	0.123228	0.00615556	0.00466254	0.0245525	0.0024437	0.00394707
ASB8	Cytosol	Unclassified	0.00497843	0.00606247	0.986603	0.00235638	0.00130072	0.00103173	0.00107546	0.00157052	0.00138897	0.00141993	0.00177476	0.00147882	0.540428	0.242008	0.078282	0.0346932	0.0911911	0.000882474	0.0014739
ASB9	Cytosol	Unclassified	0.00543462	0.00647434	0.985799	0.00229155	0.00165923	0.00120296	0.00110207	0.00147037	0.00164786	0.00150121	0.00160743	0.00171784	0.0309773	0.0165023	0.274399	0.5299	0.134021	0.000987079	0.00130447
ASCC1	Cytosol	C1	0.0555683	0.053539	0.880165	0.010728	0.0240155	0.0100014	0.00895228	0.012599	0.0224778	0.00711347	0.00842527	0.0155225	0.650119	0.124077	0.0331499	0.0145399	0.0582794	0.00398048	0.00674753
ASCC2	Unclassified	Unclassified	0.206723	0.156829	0.612723	0.0237252	0.105765	0.0277643	0.0315732	0.0416201	0.0802628	0.0179166	0.0160254	0.0426239	0.465621	0.0649185	0.0242195	0.017388	0.040576	0.0104471	0.0132781
ASCC3	Cytosol	C1	0.0888083	0.0743413	0.82351	0.0133408	0.0378787	0.0140993	0.0151547	0.0216756	0.0374874	0.00855746	0.00920445	0.019092	0.646852	0.0947934	0.0257707	0.0133931	0.0427005	0.00511694	0.00822389
ASF1A	Nuclear	N1	0.0225096	0.954583	0.0180682	0.00483887	0.00727855	0.00373538	0.00476073	0.00673496	0.836845	0.0177167	0.00906827	0.0909531	0.00489179	0.00371518	0.00246459	0.00263256	0.0043641	0.00219721	0.00264166
ASF1B	Unclassified	Unclassified	0.0724489	0.569123	0.342649	0.0157797	0.0281071	0.0126898	0.0119241	0.0197279	0.080321	0.0199466	0.0155295	0.453326	0.172112	0.0751163	0.0156494	0.0122652	0.0675064	0.00648322	0.00929648
ASH1L	Nuclear	N3	0.00468482	0.990435	0.00334722	0.0015326	0.00147156	0.00104686	0.000806785	0.00135961	0.0860182	0.100716	0.802662	0.00103902	0.000679791	0.000641639	0.000687024	0.000665985	0.000672779	0.000943465	0.000589132
ASH2L	Nuclear	N4	0.0101187	0.972924	0.0136593	0.00329796	0.00326362	0.00233917	0.00207523	0.00244071	0.00546004	0.00923272	0.00367156	0.95456	0.00218195	0.00278901	0.0019282	0.00231097	0.0044492	0.00132342	0.00197454
ASIC1	Secretory	Unclassified	0.975429	0.00416138	0.00685167	0.0135576	0.482332	0.15847	0.205367	0.12926	0.00111357	0.00108321	0.00108168	0.000882922	0.00222502	0.00128639	0.00115526	0.00106723	0.00111776	0.00898572	0.00457187
ASL	Cytosol	Unclassified	0.00334709	0.00418575	0.99103	0.00143716	0.0009989	0.000735419	0.00069164	0.00092113	0.000995402	0.000939256	0.000998751	0.00125234	0.0455561	0.0180981	0.257092	0.141853	0.528431	0.000636006	0.000801158
ASMTL	Cytosol	Unclassified	0.00319074	0.00358991	0.991783	0.00143629	0.000899305	0.000698373	0.000677189	0.000915877	0.000921703	0.000866556	0.000926516	0.000875132	0.156359	0.0152214	0.636637	0.105509	0.0780561	0.00062187	0.000814417
ASNSD1	Cytosol	Unclassified	0.00603105	0.00749699	0.983838	0.0026341	0.00168099	0.00139566	0.00130985	0.00164454	0.00168045	0.00163419	0.00176896	0.00241339	0.06115	0.177068	0.156995	0.0530929	0.535532	0.00115968	0.00147442
ASPH	Secretory	S2	0.981247	0.00303062	0.00330703	0.0124158	0.0165889	0.786672	0.123425	0.0545615	0.000907115	0.000778219	0.000655844	0.000689446	0.000643984	0.00068583	0.000661539	0.00063942	0.000676257	0.00479381	0.00762195
ASRGL1	Cytosol	Unclassified	0.0102728	0.0151017	0.97081	0.00381541	0.00337528	0.0023767	0.00196426	0.00255653	0.00305369	0.00268775	0.00328015	0.00608007	0.0248423	0.0313627	0.0458173	0.260443	0.608345	0.00153731	0.0022781
ASS1	Cytosol	Unclassified	0.00515325	0.00737177	0.98537	0.00210468	0.00162252	0.00115694	0.00102193	0.00135186	0.00154082	0.00142625	0.00155085	0.00285385	0.0190083	0.0264042	0.0676286	0.406366	0.465964	0.000904795	0.00119989
ASTE1	Nuclear	N1	0.15546	0.81933	0.0191164	0.00609318	0.118489	0.0118591	0.0117434	0.0133681	0.799244	0.00596579	0.00954963	0.00457091	0.00662918	0.00272712	0.00261969	0.00305098	0.00408943	0.00288817	0.00320501
ASXL1	Cytosol	Unclassified	0.0315892	0.0535946	0.906363	0.00845337	0.00945014	0.00602764	0.0051527	0.0109587	0.0182225	0.00823559	0.00835097	0.0187855	0.431899	0.299513	0.0344725	0.0140547	0.126424	0.003028	0.00542537
ASXL2	Nuclear	N1	0.0430939	0.895884	0.0475437	0.0134783	0.0138456	0.0101239	0.00887926	0.0102451	0.685891	0.0475176	0.0209019	0.141574	0.00899928	0.0077149	0.00748946	0.00921377	0.0141263	0.00494007	0.00853827
ATAD1	Mitochondria	M2	0.0266535	0.00141232	0.00158188	0.970352	0.00543159	0.00301117	0.00112709	0.0170836	0.000321032	0.00044292	0.000413258	0.000235105	0.000274895	0.000310879	0.000349378	0.000327673	0.000319058	0.00714826	0.963204
ATAD2	Nuclear	N3	0.0303447	0.92951	0.0269136	0.0132313	0.00989942	0.00575937	0.00395384	0.0107321	0.0227946	0.130973	0.765207	0.0105361	0.0057777	0.00472569	0.00396895	0.00522867	0.00721259	0.00760912	0.00562223
ATAD2B	Nuclear	N3	0.0295074	0.931075	0.0253239	0.0140936	0.00964278	0.00566374	0.00396113	0.0102397	0.0212674	0.107119	0.793338	0.00935057	0.00508764	0.00440212	0.00387238	0.00509857	0.00686316	0.00828686	0.00580671
ATAD3A	Mitochondria	M2	0.0092552	0.00230544	0.00241562	0.986024	0.00199485	0.00079687	0.000601205	0.00586227	0.000468044	0.000650106	0.000762851	0.000424444	0.000406936	0.000464188	0.000527539	0.000486293	0.000530665	0.00608023	0.979944
ATAD3B	Mitochondria	M2	0.0191915	0.00205774	0.0026053	0.976145	0.00482025	0.00193789	0.000930934	0.0115024	0.000468855	0.000558588	0.000550316	0.000479981	0.000461059	0.000503847	0.000564877	0.000523593	0.000551925	0.00498505	0.97116
ATAD5	Nuclear	N3	0.00418778	0.991172	0.00317475	0.00146577	0.00125887	0.000862931	0.000653873	0.00141211	0.0659611	0.0858742	0.838414	0.000922717	0.00064693	0.00061283	0.000648216	0.000629064	0.000637712	0.000906955	0.000558815
ATE1	Cytosol	Unclassified	0.0110596	0.0226676	0.962186	0.00408678	0.0036489	0.00253938	0.00211727	0.00275406	0.00337801	0.00296444	0.00355434	0.0127708	0.0147373	0.0412585	0.0230173	0.162774	0.720399	0.00162926	0.00245753
ATF1	Nuclear	N4	0.0324806	0.91198	0.0456712	0.0098678	0.0116019	0.00743188	0.0054956	0.00795122	0.0115532	0.0103575	0.0121525	0.877917	0.00770173	0.0108861	0.00511715	0.00708459	0.0148816	0.00371812	0.00614968
ATF6	Secretory	Unclassified	0.969417	0.0110215	0.00719751	0.0123643	0.0622025	0.650442	0.133545	0.123227	0.00342255	0.0035023	0.00236428	0.00173239	0.00181449	0.00140584	0.00123802	0.00126784	0.00147131	0.00594873	0.00641558
ATF6B	Secretory	Unclassified	0.98091	0.0039189	0.00421571	0.0109554	0.144975	0.586512	0.118635	0.130789	0.001079	0.00100873	0.000926708	0.000904465	0.000825633	0.000850032	0.00083169	0.000818057	0.000890304	0.00767905	0.00327635
ATF7	Nuclear	Unclassified	0.0283527	0.952643	0.00959636	0.00940757	0.00622338	0.00791788	0.0108839	0.00332754	0.0813728	0.593379	0.262365	0.0155269	0.00184197	0.00184623	0.00181781	0.00181734	0.00227301	0.0055272	0.00388037
ATF7IP	Nuclear	N4	0.00807302	0.975638	0.0136119	0.00267711	0.00264271	0.00185606	0.00150919	0.00206506	0.00227397	0.00311349	0.00283439	0.967416	0.00215857	0.00445459	0.00141567	0.00177688	0.00380618	0.00116372	0.00151339
ATG10	Unclassified	Unclassified	0.297908	0.0735493	0.193846	0.434696	0.145865	0.0431551	0.0603501	0.0485385	0.0194133	0.0132514	0.0226468	0.0182378	0.0486796	0.0448124	0.0526463	0.0209056	0.0268025	0.0111343	0.423562
ATG101	Cytosol	Unclassified	0.0034413	0.00441105	0.990666	0.00148134	0.0010229	0.000762467	0.000712809	0.000943124	0.000989761	0.00097707	0.00102197	0.00142225	0.0279749	0.0178714	0.200942	0.168214	0.575664	0.000659757	0.000821586
ATG13	Cytosol	C5	0.00512857	0.00861175	0.984099	0.00216063	0.00147636	0.00120487	0.00109364	0.0013537	0.00143397	0.00141384	0.00151679	0.00424716	0.0260802	0.0491443	0.0498303	0.0942158	0.764829	0.000977082	0.00118354
ATG16L1	Cytosol	Unclassified	0.00398881	0.00455146	0.989732	0.00172806	0.00117367	0.000877225	0.000830974	0.00110695	0.00116857	0.00108085	0.0011524	0.00114965	0.0833957	0.0101742	0.635761	0.205765	0.0546358	0.000746149	0.000981907
ATG2A	Cytosol	Unclassified	0.00332827	0.00365428	0.99154	0.00147787	0.000939517	0.000726285	0.000707791	0.000954682	0.000958811	0.000893612	0.000970363	0.00083149	0.337665	0.0194902	0.563613	0.058373	0.0123986	0.000616415	0.000861452
ATG3	Cytosol	Unclassified	0.00708423	0.00877193	0.981383	0.00276107	0.00230242	0.00155962	0.00135774	0.00186445	0.0021224	0.0018994	0.00218333	0.00256679	0.0353173	0.0151886	0.137774	0.726945	0.0661575	0.00112067	0.00164041
ATG4A	Cytosol	Unclassified	0.00670515	0.00817177	0.982422	0.0027008	0.00211995	0.00151853	0.00133039	0.00173629	0.00198454	0.00181546	0.00202546	0.0023463	0.0324503	0.0179495	0.115633	0.685753	0.130636	0.0011405	0.0015603
ATG4B	Cytosol	Unclassified	0.00368599	0.00421605	0.990489	0.00160903	0.00108213	0.000811289	0.000767135	0.00102544	0.00107112	0.00101983	0.00106632	0.00105878	0.105003	0.00925765	0.717993	0.121558	0.0366764	0.000699981	0.000909045
ATG7	Cytosol	Unclassified	0.00342402	0.00390579	0.991167	0.00150275	0.000995157	0.000752764	0.000716746	0.000959354	0.000983251	0.000947807	0.000986015	0.000988715	0.0852931	0.0132455	0.64556	0.189465	0.0576042	0.000659907	0.000842842
ATG9A	Secretory	S1	0.920262	0.0454614	0.0224195	0.0118571	0.646203	0.0949266	0.0593533	0.119779	0.0207049	0.00762696	0.0104357	0.0066938	0.00501229	0.00412586	0.00358891	0.00424178	0.00545065	0.00706999	0.0047871
ATIC	Cytosol	Unclassified	0.00432908	0.00596747	0.987884	0.00181987	0.00131783	0.000968066	0.000880362	0.00116282	0.00128498	0.00120979	0.00129251	0.0021802	0.0167056	0.0248962	0.0823844	0.356812	0.507085	0.000800266	0.0010196
ATL1	Secretory	Unclassified	0.969039	0.00611118	0.00233137	0.0225183	0.0805206	0.148276	0.701016	0.0392267	0.00207519	0.00179528	0.00165296	0.000587755	0.000436328	0.000442816	0.000488567	0.000494382	0.000469272	0.0217751	0.000743267
ATL2	Secretory	S1	0.96606	0.0175166	0.00575791	0.010665	0.737128	0.0652221	0.0966794	0.067031	0.0103728	0.00197159	0.00376663	0.00140561	0.00116222	0.00108182	0.00113597	0.0011274	0.00125051	0.00940793	0.00125709
ATL3	Secretory	Unclassified	0.971504	0.0111475	0.00448967	0.0128584	0.13734	0.219753	0.576527	0.0378837	0.00587984	0.0017845	0.00247626	0.00100691	0.000930112	0.000883261	0.000877873	0.00086604	0.000932389	0.0115443	0.0013141
ATM	Nuclear	N1	0.0434105	0.86526	0.0787911	0.012538	0.0142986	0.00842891	0.00703623	0.0136467	0.748057	0.0194352	0.0211923	0.076576	0.0162578	0.0225336	0.00797091	0.00853199	0.0234967	0.00468468	0.0078533
ATN1	Nuclear	N4	0.0142229	0.774608	0.206147	0.00502263	0.0044511	0.00321745	0.00298232	0.003572	0.00414081	0.00490187	0.00473462	0.76083	0.00610356	0.012738	0.00425439	0.00821939	0.174832	0.00207301	0.00294962
ATOH8	Cytosol	Unclassified	0.113808	0.104433	0.751274	0.0304856	0.0252191	0.0201055	0.0212161	0.0472674	0.0244086	0.0256165	0.0386663	0.0157412	0.495823	0.129479	0.0467767	0.0188784	0.0603158	0.00656208	0.0239235
ATOX1	Cytosol	Unclassified	0.00622635	0.00776866	0.983503	0.00250165	0.00199143	0.00136329	0.00121199	0.00165964	0.00188619	0.00171217	0.00190708	0.00226322	0.0265352	0.015399	0.10877	0.659659	0.17314	0.00104087	0.00146078
ATP11A	Secretory	Unclassified	0.971389	0.0100427	0.00806535	0.0105027	0.4946	0.132185	0.0670524	0.277552	0.00288535	0.00249356	0.00268394	0.00197983	0.00173607	0.00153314	0.00146904	0.00152589	0.0018012	0.00884501	0.0016577
ATP11B	Secretory	Unclassified	0.974822	0.01103	0.00595777	0.00818991	0.585473	0.13292	0.0680529	0.188377	0.00433384	0.002274	0.00291441	0.00150779	0.00132603	0.00113342	0.00108947	0.00111909	0.00128977	0.00714519	0.00104472
ATP11C	Secretory	Unclassified	0.978783	0.00517858	0.00497901	0.0110598	0.470751	0.118529	0.0467838	0.342718	0.00130696	0.00136366	0.00131965	0.00118832	0.00101888	0.000989633	0.000953233	0.000939782	0.00107748	0.00989304	0.00116672
ATP12A	Secretory	Unclassified	0.959669	0.0143468	0.00890114	0.0170827	0.486049	0.259874	0.0438339	0.169913	0.00481578	0.00470488	0.00258816	0.00223797	0.00223159	0.00172363	0.00150721	0.00156958	0.00186914	0.00755358	0.00952916
ATP13A1	Secretory	Unclassified	0.983724	0.00180457	0.0023217	0.0121496	0.0415392	0.703454	0.166908	0.0718237	0.000434304	0.000508058	0.000433336	0.000428877	0.000407712	0.00047566	0.000492344	0.000476063	0.000469925	0.00834789	0.00380166
ATP13A2	Secretory	Unclassified	0.982292	0.00697869	0.00555479	0.00517433	0.552167	0.0862902	0.13965	0.204184	0.00322746	0.00133719	0.00136553	0.00104852	0.00165027	0.000947572	0.000939958	0.000954408	0.00106258	0.00413913	0.0010352
ATP13A3	Secretory	Unclassified	0.961343	0.0161676	0.0118555	0.0106344	0.550617	0.162751	0.0562918	0.191683	0.00509854	0.0037572	0.00419111	0.00312072	0.00266502	0.00223607	0.00203582	0.00222044	0.00269814	0.00819692	0.00243745
ATP1A1	Secretory	Unclassified	0.983276	0.00221439	0.00285961	0.0116504	0.551312	0.109839	0.0392137	0.282911	0.000420775	0.000682884	0.000543853	0.000566882	0.000514682	0.000584855	0.000615697	0.000560374	0.000583999	0.00977393	0.0018765
ATP1A2	Secretory	Unclassified	0.982385	0.00393988	0.00368233	0.00999283	0.523163	0.118841	0.0863729	0.254009	0.00100656	0.00102866	0.00108311	0.000821551	0.000743528	0.000693179	0.000732339	0.000722106	0.000791179	0.00900222	0.00099061
ATP1B1	Secretory	Unclassified	0.975271	0.00668165	0.00564551	0.0124015	0.494108	0.215135	0.0437039	0.222324	0.00196737	0.00185832	0.00153475	0.00132121	0.00127766	0.00111072	0.00104577	0.00102493	0.00118643	0.00943535	0.00296611
ATP1B2	Cytosol	Unclassified	0.0488926	0.0618523	0.873432	0.0158232	0.0168052	0.0117799	0.00882639	0.011481	0.0155352	0.0116246	0.0165623	0.0181302	0.0358436	0.0234517	0.0622227	0.605773	0.146141	0.00565688	0.0101664
ATP1B3	Secretory	Unclassified	0.982974	0.00240359	0.00301491	0.0116072	0.42726	0.257756	0.0763132	0.221645	0.00054755	0.000677067	0.000596988	0.000581983	0.000560812	0.000608447	0.000628766	0.000596484	0.000620404	0.00988154	0.00172567
ATP23	Mitochondria	M2	0.117552	0.022687	0.015222	0.844539	0.0351261	0.0103433	0.0324872	0.0395959	0.00369521	0.005148	0.00986736	0.00397639	0.0027792	0.00277399	0.0028631	0.00293114	0.00387462	0.0379376	0.806601
ATP2A2	Secretory	Unclassified	0.980669	0.00146789	0.00197285	0.0158904	0.0475772	0.663267	0.204382	0.0654424	0.000322672	0.000463411	0.000354249	0.000327555	0.000314687	0.000397602	0.000434772	0.000430604	0.000395187	0.0131775	0.00271283
ATP2A3	Secretory	Unclassified	0.987717	0.00274021	0.00286217	0.00668041	0.0131488	0.681328	0.258221	0.0350191	0.000914983	0.000672568	0.000568816	0.000583845	0.000563691	0.000599315	0.000581358	0.000551072	0.000566734	0.00503724	0.00164317
ATP2B1	Secretory	Unclassified	0.985208	0.00202799	0.00263661	0.0101275	0.538673	0.115816	0.0391895	0.291529	0.000412391	0.000604246	0.000487437	0.000523911	0.000486343	0.000546646	0.000561214	0.000509896	0.000532516	0.00877213	0.00135542
ATP2B4	Secretory	Unclassified	0.980537	0.00268615	0.00308151	0.0136958	0.481798	0.177916	0.0572813	0.263541	0.000613936	0.00076989	0.000668509	0.000633813	0.00057377	0.000628384	0.000646166	0.000598325	0.000634865	0.0113314	0.00236441
ATP2C1	Secretory	Unclassified	0.984081	0.00274362	0.00317701	0.00999834	0.520217	0.140503	0.0471135	0.276247	0.000633663	0.000753517	0.000671339	0.000685105	0.000601617	0.000653214	0.000653376	0.00060866	0.000660141	0.00852449	0.00147384
ATP5F1A	Mitochondria	M2	0.0168125	0.00190089	0.00150514	0.979781	0.00280236	0.00160405	0.000869826	0.0115362	0.000379544	0.000624289	0.000681564	0.000215497	0.000253711	0.000296012	0.000337198	0.000311927	0.000306293	0.0112825	0.968499
ATP5F1B	Mitochondria	M2	0.0423621	0.00444059	0.00230275	0.950895	0.00858505	0.00424177	0.00798267	0.0215526	0.000615449	0.00161963	0.00178334	0.000422175	0.000403633	0.000446265	0.000471359	0.000501677	0.000479818	0.0443617	0.906533
ATP5F1C	Mitochondria	M2	0.0175687	0.00188896	0.00207828	0.978464	0.00323595	0.00267348	0.00101032	0.010649	0.000419818	0.000581044	0.000544571	0.000343531	0.000399559	0.000426197	0.000441551	0.000391797	0.000419171	0.00571071	0.972753
ATP5F1D	Mitochondria	M2	0.0524526	0.00847447	0.00320986	0.935863	0.00806851	0.0059816	0.0114098	0.0269927	0.000923766	0.00270052	0.00421509	0.000635095	0.000589164	0.000617906	0.000645509	0.000682984	0.000674302	0.0770956	0.858767
ATP5F1E	Mitochondria	M2	0.0799719	0.00978541	0.00820006	0.902043	0.0169513	0.0175462	0.0150419	0.0304325	0.0022329	0.00284336	0.00267174	0.00203742	0.00181537	0.00161864	0.00148789	0.00146519	0.00181297	0.0123905	0.889652
ATP5IF1	Mitochondria	M1	0.0729964	0.205032	0.0530789	0.668893	0.0147513	0.0158739	0.0205596	0.0218117	0.0154539	0.0290554	0.0351223	0.1254	0.0112385	0.0104894	0.00795053	0.0097631	0.0136373	0.642514	0.0263786
ATP5MD	Mitochondria	M2	0.135064	0.0425935	0.0294205	0.792922	0.0284023	0.0323892	0.016779	0.0574934	0.0111139	0.010589	0.0120296	0.00886098	0.00659039	0.00532693	0.0045355	0.00555252	0.00741519	0.00830007	0.784622
ATP5ME	Mitochondria	M2	0.0216626	0.00438014	0.00308623	0.970871	0.00308084	0.0034996	0.00127653	0.0138057	0.000972692	0.00127887	0.00152684	0.00060173	0.000612454	0.000635851	0.000635877	0.000565804	0.00063624	0.00493372	0.965937
ATP5MG	Mitochondria	M2	0.0247748	0.00207256	0.00252293	0.97063	0.00637209	0.00323494	0.0012028	0.0139649	0.000493075	0.000576059	0.000519884	0.000483545	0.000490617	0.000507702	0.000524498	0.000480493	0.000519623	0.00362233	0.967007
ATP5PB	Mitochondria	M2	0.0259421	0.00211358	0.00172602	0.970218	0.00430985	0.00308436	0.00120002	0.0173479	0.000457833	0.000669371	0.000718517	0.00026786	0.000307639	0.000343622	0.000378271	0.000345849	0.000350637	0.00996855	0.96025
ATP5PD	Mitochondria	M2	0.015648	0.00192884	0.00218436	0.980239	0.00249375	0.00240894	0.000880737	0.0098646	0.000421601	0.000588489	0.00057678	0.000341969	0.000418871	0.00045049	0.000467595	0.000408481	0.000438918	0.00512067	0.975118
ATP5PO	Mitochondria	M2	0.0563329	0.00292459	0.0027784	0.937964	0.0071869	0.0136141	0.00373903	0.0317929	0.000750314	0.000811854	0.000846883	0.000515544	0.000555349	0.000575231	0.000568738	0.000519145	0.000559933	0.00629563	0.931668
ATP5S	Mitochondria	Unclassified	0.147041	0.0576664	0.021021	0.774272	0.0124365	0.0285992	0.0605677	0.0454376	0.00399652	0.0197093	0.0261285	0.0078322	0.00485409	0.00477618	0.00363774	0.00350458	0.00424835	0.545853	0.228419
ATP6AP1	Secretory	Unclassified	0.978698	0.00351544	0.00337701	0.0144095	0.0559502	0.654925	0.198617	0.0692061	0.000896439	0.000947644	0.000930832	0.000740523	0.000640185	0.000646149	0.000687709	0.000688971	0.000713997	0.012093	0.00231654
ATP6AP2	Secretory	Unclassified	0.987974	0.00202603	0.00240617	0.00759363	0.0395891	0.719611	0.171471	0.0573035	0.000536249	0.000538055	0.000489164	0.00046256	0.000420413	0.000486909	0.000506496	0.000496536	0.000495815	0.00592882	0.00166481
ATP6V0A1	Secretory	Unclassified	0.978259	0.0103637	0.00587864	0.00549899	0.528339	0.0957995	0.11497	0.23915	0.00510378	0.00191684	0.00199433	0.00134874	0.00149507	0.00106157	0.00102987	0.00107301	0.00121912	0.00457832	0.000920674
ATP6V0A2	Secretory	Unclassified	0.983144	0.00684805	0.00293354	0.00707488	0.544823	0.110781	0.112215	0.215325	0.00318648	0.00138276	0.0016263	0.000652515	0.00066996	0.000548704	0.000566653	0.000560252	0.000587976	0.00656915	0.000505729
ATP6V0A4	Secretory	S1	0.91132	0.0665383	0.0138253	0.00831598	0.608154	0.0709613	0.0918893	0.140316	0.0526967	0.00447369	0.00630507	0.00306279	0.00441884	0.00221169	0.00210708	0.00231555	0.00277215	0.00556192	0.00275406
ATP6V0C	Secretory	S1	0.93034	0.0341288	0.0196923	0.0158392	0.654827	0.153185	0.0463607	0.0759667	0.0114722	0.00832019	0.00896008	0.00537637	0.00519327	0.00352757	0.00300745	0.00349835	0.00446567	0.00959544	0.00624379
ATP6V0D1	Secretory	Unclassified	0.973859	0.0110552	0.00832745	0.00675889	0.519077	0.082633	0.168564	0.203585	0.00482828	0.00225863	0.00225995	0.0017083	0.00237893	0.00143617	0.00138332	0.00145102	0.00167801	0.00509756	0.00166133
ATP6V0D2	Secretory	Unclassified	0.672074	0.158785	0.131292	0.0378478	0.424217	0.0758145	0.0577434	0.114299	0.0450568	0.0294397	0.0433407	0.0409481	0.028823	0.0221681	0.0175932	0.0252301	0.037478	0.0147788	0.023069
ATP6V1A	Cytosol	Unclassified	0.0164657	0.011485	0.966852	0.00519721	0.00590616	0.00348214	0.00342253	0.00365486	0.00329672	0.00235584	0.00284589	0.00298658	0.601349	0.285817	0.0462973	0.0126087	0.0207798	0.0016613	0.00353591
ATP6V1C1	Cytosol	Unclassified	0.0912835	0.0493173	0.841811	0.0175879	0.0402157	0.0175592	0.0173492	0.0161594	0.0155877	0.00876347	0.0114611	0.0135051	0.471522	0.257203	0.0495779	0.0204726	0.0430353	0.0057596	0.0118283
ATP6V1D	Cytosol	Unclassified	0.119854	0.0523431	0.809848	0.0179557	0.0570758	0.0216112	0.0223082	0.0188585	0.0184505	0.00911422	0.0119427	0.0128357	0.554483	0.152153	0.0481131	0.0212343	0.0338643	0.00613809	0.0118176
ATP6V1E1	Unclassified	Unclassified	0.311735	0.0482187	0.618625	0.0214209	0.172186	0.0372519	0.062338	0.0399597	0.0201954	0.00816003	0.00987975	0.00998356	0.441312	0.102713	0.0309103	0.017152	0.0265371	0.0078418	0.0135791
ATP6V1F	Secretory	Unclassified	0.767094	0.0419748	0.175328	0.0156029	0.551587	0.0664829	0.0916638	0.0573606	0.0175496	0.00734146	0.00900831	0.00807539	0.12187	0.0187762	0.0131599	0.00946339	0.0120586	0.0075	0.00810295
ATP6V1G1	Cytosol	Unclassified	0.237034	0.0557981	0.683491	0.0236765	0.117936	0.0369795	0.0474697	0.0346488	0.0210412	0.00968657	0.0113819	0.0136885	0.471091	0.120879	0.0375216	0.0188604	0.0351388	0.00886145	0.0148151
ATP6V1H	Cytosol	Unclassified	0.209453	0.044557	0.720721	0.0252691	0.0883574	0.0372496	0.049001	0.0348451	0.0163667	0.00814873	0.0101305	0.00991101	0.518979	0.11777	0.0383573	0.0181056	0.0275091	0.00832909	0.01694
ATP7A	Secretory	Unclassified	0.981948	0.00474974	0.00368646	0.00961546	0.546266	0.127419	0.0585319	0.249732	0.00149531	0.00118378	0.00124855	0.000822089	0.00077786	0.00073168	0.000715858	0.000698593	0.00076247	0.00883295	0.000782515
ATP8A1	Secretory	Unclassified	0.912992	0.0534609	0.0232299	0.0103167	0.571071	0.0588509	0.13039	0.152681	0.0392003	0.00484973	0.0055724	0.00383845	0.00977617	0.00326649	0.00302833	0.00318666	0.00397229	0.00616529	0.00415143
ATP8B1	Secretory	Unclassified	0.965879	0.011967	0.00992164	0.0122321	0.475197	0.131857	0.0669542	0.291872	0.00346114	0.00295086	0.0031175	0.00243753	0.00200626	0.00184413	0.00181485	0.00194045	0.00231595	0.00986215	0.00236996
ATP8B2	Secretory	S1	0.98066	0.00217873	0.00270712	0.0144542	0.620577	0.0871694	0.0519323	0.220981	0.000391756	0.000687651	0.000567072	0.000532251	0.000489131	0.000539696	0.00057654	0.000548583	0.000553166	0.0109327	0.00352155
ATP9A	Secretory	Unclassified	0.975974	0.0129113	0.00543785	0.00567698	0.583253	0.110373	0.0971124	0.185235	0.00762722	0.00187933	0.00213102	0.00127369	0.00144974	0.000952389	0.00094479	0.000985451	0.00110548	0.00471807	0.000958904
ATP9B	Secretory	S1	0.879974	0.0812009	0.026854	0.0119714	0.676854	0.0547643	0.0699224	0.0784334	0.0595995	0.00652162	0.00881727	0.00626258	0.00740457	0.00440449	0.00438227	0.00486959	0.00579309	0.00671102	0.00526039
ATPAF1	Mitochondria	M1	0.0368861	0.0464316	0.0212532	0.895429	0.00492232	0.00824314	0.0106992	0.0130214	0.00455822	0.0111208	0.0164729	0.0142797	0.00438782	0.00446595	0.00358708	0.0040602	0.00475211	0.848326	0.047103
ATRN	Secretory	Unclassified	0.919147	0.0279226	0.0143445	0.0385854	0.218433	0.0814667	0.463411	0.155836	0.00927173	0.00790758	0.00600215	0.00474117	0.00298831	0.0026478	0.00265019	0.00277914	0.0032791	0.0346753	0.00391012
ATRX	Nuclear	Unclassified	0.00871207	0.967511	0.00749011	0.0162866	0.00159663	0.00214482	0.00266386	0.00230677	0.00864948	0.826222	0.117308	0.0153314	0.00140923	0.00143543	0.00148033	0.00144469	0.00172043	0.0103565	0.00593009
ATXN1	Nuclear	N4	0.0114561	0.711572	0.272942	0.00402998	0.00295534	0.00222691	0.00225681	0.00401701	0.00360394	0.00597799	0.00420146	0.697788	0.0195899	0.169018	0.00592532	0.00471736	0.0736921	0.00159972	0.00243026
ATXN10	Cytosol	C1	0.00609051	0.00728866	0.983949	0.00267161	0.00176301	0.00136962	0.00122528	0.0017326	0.00176589	0.00173315	0.00193757	0.00185204	0.716049	0.052421	0.181044	0.0271396	0.0072961	0.00105434	0.00161727
ATXN1L	Nuclear	N4	0.0104532	0.955658	0.0303523	0.00353664	0.00326434	0.0023443	0.00208753	0.00275703	0.00296535	0.00397768	0.00357232	0.945143	0.00382337	0.00972779	0.00203867	0.0024529	0.0123095	0.00152926	0.00200738
ATXN2	Cytosol	C2	0.00533101	0.0101655	0.982166	0.00233771	0.00148218	0.00120334	0.00115342	0.00149208	0.00163128	0.00165596	0.00170463	0.00517364	0.0263233	0.757993	0.0152256	0.00664993	0.175974	0.00102366	0.00131406
ATXN2L	Cytosol	C2	0.00631641	0.0132993	0.977755	0.002629	0.00178274	0.00145236	0.00133229	0.00174903	0.00204157	0.00204409	0.00206252	0.00715117	0.023076	0.815285	0.0135489	0.00608067	0.119765	0.00115774	0.00147126
ATXN3	Cytosol	Unclassified	0.00765782	0.010345	0.978811	0.00318638	0.00224237	0.00182076	0.00162026	0.00197442	0.00206299	0.00204038	0.00227294	0.00396866	0.0556339	0.0934377	0.262934	0.0399615	0.526844	0.00139189	0.00179449
ATXN7	Nuclear	N1	0.0608398	0.933795	0.00312678	0.0022382	0.0454565	0.00466496	0.00658004	0.00413829	0.921548	0.0028613	0.00850005	0.000886038	0.000818872	0.000523877	0.000592159	0.000595186	0.000596691	0.00135472	0.000883479
ATXN7L2	Nuclear	N1	0.00958729	0.985736	0.00320868	0.00146781	0.00500435	0.00128108	0.00129126	0.00201061	0.975919	0.00378042	0.0046789	0.00135823	0.000645828	0.000549667	0.000685226	0.000678907	0.000649056	0.000808298	0.000659508
ATXN7L3	Nuclear	N1	0.0070478	0.988811	0.00311246	0.00102872	0.00316046	0.000878782	0.00124171	0.00176685	0.978074	0.00533718	0.00344553	0.00195466	0.000762769	0.000513193	0.000621286	0.000610482	0.000604734	0.000536005	0.000492719
ATXN7L3B	Cytosol	Unclassified	0.00523251	0.00728634	0.985337	0.00214369	0.0016129	0.00118204	0.00105702	0.00138055	0.0015405	0.00144277	0.00158792	0.00271514	0.01712	0.0254122	0.0705992	0.33157	0.540636	0.00092297	0.00122072
AUP1	Secretory	Unclassified	0.985565	0.00161265	0.00203905	0.0107837	0.0274055	0.675085	0.235212	0.0478623	0.000405812	0.000455305	0.000388695	0.000362838	0.000334321	0.000416168	0.000445949	0.000433306	0.000409303	0.00834837	0.00243528
AURKA	Cytosol	Unclassified	0.0226532	0.026345	0.942395	0.00860696	0.00571914	0.00404651	0.00419445	0.00869308	0.00507454	0.00551471	0.00623708	0.00951868	0.29986	0.521662	0.0304867	0.0105302	0.079856	0.00252579	0.00608117
AURKAIP1	Secretory	Unclassified	0.831221	0.118032	0.0303382	0.0204087	0.202847	0.37377	0.159806	0.0947976	0.0227368	0.0666415	0.0188223	0.00983182	0.00687408	0.00547485	0.0049534	0.00577254	0.00726334	0.00905346	0.0113552
AURKB	Nuclear	N3	0.0162354	0.929601	0.00428087	0.0498824	0.0025594	0.00202144	0.00468323	0.00697133	0.00849806	0.172769	0.746665	0.0016699	0.00081901	0.000859875	0.000906501	0.000838214	0.000857267	0.0336562	0.0162262
AUTS2	Nuclear	N4	0.0435362	0.876872	0.064885	0.0147069	0.0155575	0.00927731	0.0073195	0.0113818	0.019283	0.0127892	0.0175726	0.827227	0.0119767	0.0127761	0.00701801	0.0101515	0.0229628	0.00551937	0.00918751
AVEN	Cytosol	C1	0.00591922	0.00703531	0.984462	0.00258353	0.00167163	0.00134998	0.00123203	0.00166558	0.00167897	0.00163462	0.00179017	0.00193155	0.6512	0.0542687	0.194085	0.0275556	0.0573526	0.00106969	0.00151385
AVL9	Cytosol	C1	0.0140703	0.00954543	0.971653	0.00473167	0.00479339	0.00271934	0.00299409	0.00356346	0.00288059	0.00192661	0.00246345	0.00227478	0.661638	0.232932	0.0446619	0.0127152	0.0197062	0.00135332	0.00337835
AVPI1	Nuclear	N1	0.0837938	0.781054	0.127686	0.00746687	0.0380105	0.00955206	0.0129405	0.0232908	0.738989	0.0115945	0.0130054	0.0174646	0.0983686	0.00782959	0.00602889	0.00538713	0.0100715	0.00307716	0.00438971
AXIN1	Cytosol	Unclassified	0.00967649	0.0321912	0.954268	0.00386438	0.00287374	0.00233818	0.00203446	0.00243011	0.00267141	0.00256306	0.00290894	0.0240478	0.0237388	0.208143	0.0305727	0.0248396	0.666973	0.0016726	0.00219179
AXL	Secretory	Unclassified	0.982587	0.0031314	0.00305872	0.0112228	0.499618	0.0915256	0.0428041	0.348639	0.000704655	0.000908715	0.000843741	0.000674288	0.000600305	0.00060869	0.000631777	0.000591171	0.000626772	0.0105003	0.000722521
AZGP1	Cytosol	C2	0.0134588	0.0161759	0.963215	0.0071502	0.00368651	0.0032956	0.00267897	0.00379774	0.00265291	0.00332508	0.00449622	0.00570167	0.222011	0.627522	0.039396	0.0167099	0.0575764	0.00252773	0.00462247
AZI2	Cytosol	Unclassified	0.00370002	0.00431104	0.990335	0.00165392	0.00103724	0.00082987	0.00079803	0.00103487	0.00102904	0.00100692	0.00106862	0.00120647	0.0938522	0.0419727	0.457019	0.0763513	0.32114	0.000727214	0.000926701
B2M	Secretory	Unclassified	0.985709	0.00332235	0.00289135	0.00807732	0.514513	0.0944043	0.146955	0.229837	0.000974556	0.000951164	0.000840932	0.000555699	0.000647251	0.000542561	0.000570316	0.000557862	0.000573361	0.0075016	0.000575715
B3GALNT1	Secretory	Unclassified	0.960001	0.00392536	0.00311471	0.0329594	0.214232	0.410805	0.179862	0.155102	0.00105811	0.00107158	0.001208	0.000587663	0.000600014	0.000629704	0.000628638	0.000616449	0.000639904	0.0273492	0.00561014
B3GALNT2	Secretory	S2	0.970105	0.00280533	0.0028473	0.0242423	0.0160209	0.741288	0.152754	0.0600416	0.000727597	0.000799697	0.000786054	0.000491985	0.000453843	0.000579997	0.000606001	0.000615396	0.000592058	0.010422	0.0138203
B3GALT6	Secretory	Unclassified	0.973762	0.00268535	0.00373746	0.0198154	0.524822	0.188537	0.0427762	0.217627	0.000575805	0.000768821	0.000649973	0.000690748	0.000658618	0.000771072	0.000772498	0.000745386	0.00078989	0.00892226	0.0108931
B3GAT3	Secretory	Unclassified	0.902534	0.00604423	0.0060784	0.0853431	0.441337	0.109965	0.134425	0.216808	0.00115057	0.00194863	0.0015715	0.00137353	0.00114369	0.00119232	0.00121048	0.00123514	0.00129677	0.0603445	0.0249986
B3GLCT	Nuclear	N4	0.0148349	0.948032	0.0315404	0.00559232	0.00393995	0.00265336	0.00342646	0.00481511	0.00394239	0.00736776	0.0048372	0.931885	0.00362346	0.0178624	0.00230698	0.00263599	0.00511162	0.00250906	0.00308326
B3GNT2	Secretory	Unclassified	0.975293	0.00633613	0.00649005	0.0118807	0.555887	0.0897394	0.0403862	0.28928	0.00158689	0.00166171	0.00155805	0.00152948	0.00124731	0.00125949	0.00124919	0.00126297	0.00147109	0.00804651	0.00383422
B3GNT9	Secretory	Unclassified	0.882249	0.0483603	0.031204	0.0381866	0.440449	0.212522	0.0362489	0.193029	0.0137158	0.015469	0.0104108	0.00876477	0.00708345	0.00543023	0.00501462	0.00594653	0.00772913	0.00929999	0.0288866
B4GALT1	Secretory	Unclassified	0.971444	0.00488272	0.00722412	0.0164494	0.466066	0.117429	0.24871	0.139239	0.00126792	0.00135728	0.00124568	0.00101184	0.00230233	0.00134078	0.00122816	0.00113017	0.00122269	0.0106229	0.00582646
B4GALT2	Secretory	Unclassified	0.972616	0.00655043	0.0101446	0.0106887	0.408127	0.143203	0.305142	0.116145	0.00211136	0.00181795	0.00157222	0.00104891	0.00452043	0.00160097	0.00139831	0.00124077	0.00138409	0.00690606	0.00378269
B4GALT3	Cytosol	Unclassified	0.0449109	0.0803727	0.846429	0.0282872	0.0122043	0.00817901	0.00770123	0.0168264	0.00608005	0.00994176	0.0135867	0.0507642	0.24007	0.483277	0.0273077	0.0129632	0.0828106	0.00883674	0.0194505
B4GALT4	Secretory	Unclassified	0.981761	0.00396603	0.0041661	0.0101073	0.568751	0.0836568	0.059523	0.26983	0.000932846	0.00107368	0.00103959	0.000919913	0.000854503	0.000807984	0.000818114	0.00079272	0.000892783	0.00774316	0.00236413
B4GALT7	Secretory	Unclassified	0.953776	0.00745139	0.00742619	0.0313461	0.49212	0.132566	0.0502403	0.278851	0.00184896	0.00199632	0.00182868	0.00177743	0.00152617	0.00145456	0.0014168	0.00142102	0.00160764	0.0129913	0.0183548
B4GAT1	Secretory	Unclassified	0.900424	0.00476071	0.00559194	0.0892235	0.321655	0.221791	0.170532	0.186446	0.000973759	0.00160439	0.00127832	0.000904252	0.0012227	0.00114781	0.00106396	0.00106293	0.00109454	0.0409558	0.0482677
BABAM1	Cytosol	C1	0.00528483	0.00634245	0.985984	0.00238841	0.00141721	0.00110926	0.00108367	0.00167469	0.00153934	0.00146087	0.00173967	0.00160257	0.672858	0.166945	0.0651886	0.0201221	0.0608704	0.00092951	0.0014589
BABAM2	Cytosol	C1	0.00297511	0.00356834	0.992057	0.00139964	0.000793576	0.000679589	0.000612623	0.000889318	0.000820196	0.000923029	0.00100088	0.000824236	0.712273	0.187944	0.0562393	0.0113716	0.0242289	0.000608486	0.000791151
BACE2	Secretory	Unclassified	0.967092	0.0120669	0.00900366	0.0118372	0.5139	0.14147	0.0622988	0.249423	0.00373217	0.00288461	0.00318558	0.00226451	0.00196335	0.00169053	0.00162186	0.00170817	0.00201975	0.0099791	0.00185809
BACH1	Cytosol	Unclassified	0.0526418	0.125807	0.797393	0.0241585	0.0134465	0.012873	0.00991336	0.0164089	0.0137297	0.0239371	0.070818	0.0173218	0.246628	0.351954	0.043148	0.108478	0.047185	0.00704193	0.0171165
BAD	Secretory	Unclassified	0.763982	0.0169323	0.0068759	0.21221	0.0592893	0.39795	0.171051	0.135692	0.00213808	0.00603462	0.00748267	0.00127691	0.00145389	0.00132355	0.00131229	0.00139023	0.00139595	0.10927	0.10294
BAG1	Cytosol	Unclassified	0.015472	0.023492	0.955405	0.00563106	0.00431835	0.00317994	0.00288972	0.00508405	0.00562199	0.00474072	0.00544688	0.00768238	0.270695	0.514989	0.029268	0.013716	0.126737	0.00206459	0.00356647
BAG2	Secretory	Unclassified	0.96238	0.0158446	0.0104756	0.0112999	0.46969	0.114186	0.279215	0.0992885	0.00755172	0.00318059	0.00346898	0.00164326	0.00408677	0.00162857	0.00156925	0.00148994	0.00170104	0.00806673	0.00323316
BAG3	Cytosol	Unclassified	0.00357627	0.00480007	0.990108	0.00151588	0.00108282	0.000794756	0.000732811	0.000965881	0.00106205	0.00101162	0.00105713	0.00166927	0.0171779	0.0170124	0.11306	0.331408	0.51145	0.000674411	0.00084147
BAG5	Cytosol	C2	0.0096283	0.0134024	0.972733	0.00423657	0.00275942	0.00212831	0.00199661	0.00274395	0.00205483	0.00240564	0.00247222	0.00646976	0.0980353	0.763599	0.0344109	0.00758032	0.0691068	0.00169087	0.00254569
BAHCC1	Cytosol	Unclassified	0.0149209	0.0198642	0.959234	0.00598076	0.00450706	0.00342927	0.00297324	0.00401129	0.00458706	0.0039885	0.0047341	0.00655452	0.109352	0.0892292	0.0928812	0.137995	0.529777	0.00240896	0.0035718
BAHD1	Nuclear	Unclassified	0.0508724	0.913003	0.0245885	0.0115362	0.0123815	0.0104149	0.0098171	0.0182589	0.227104	0.501972	0.144217	0.0397098	0.00759894	0.00420057	0.00375403	0.003515	0.00552001	0.00609175	0.00544448
BAIAP2	Secretory	S1	0.862372	0.0953608	0.0294244	0.0128429	0.618667	0.0724093	0.0918404	0.0794548	0.070966	0.00768041	0.00954443	0.00716997	0.00843763	0.00481389	0.0046444	0.00522754	0.00630092	0.00723777	0.00560509
BAIAP2L1	Nuclear	N1	0.110675	0.772645	0.104004	0.0126758	0.0507208	0.016937	0.0213417	0.0216753	0.710362	0.0154616	0.0150403	0.0317817	0.0669146	0.0105724	0.00716365	0.00722939	0.0121242	0.00595382	0.006722
BAK1	Mitochondria	M2	0.117232	0.0166566	0.0169819	0.84913	0.0219681	0.016257	0.0465342	0.0324725	0.00236433	0.00429501	0.00750084	0.00249645	0.00411733	0.00434756	0.00300276	0.00249725	0.003017	0.029994	0.819136
BANP	Nuclear	Unclassified	0.0252996	0.929385	0.0305654	0.0147498	0.00420504	0.00418148	0.00400954	0.0129036	0.00974002	0.735063	0.0546928	0.12989	0.00725801	0.00949876	0.0038754	0.00373668	0.00619655	0.00802448	0.00672528
BAP1	Nuclear	N1	0.0111978	0.97539	0.0101466	0.00326545	0.00332748	0.00221819	0.00325301	0.0023991	0.94507	0.0137927	0.00771999	0.00880721	0.00188135	0.00178648	0.00192173	0.00204844	0.00250858	0.00142542	0.00184003
BARD1	Nuclear	N1	0.00931823	0.987371	0.00213387	0.00117706	0.00596325	0.000983495	0.00123233	0.00113916	0.977341	0.00276822	0.0067827	0.000479148	0.000358176	0.000413627	0.000498824	0.000458877	0.000404361	0.000722763	0.000454297
BASP1	Secretory	S1	0.931492	0.0372267	0.0205886	0.0106927	0.661735	0.105958	0.0700736	0.0937256	0.0159626	0.00698402	0.00835484	0.00592522	0.00465503	0.0035881	0.00333514	0.00396619	0.00504416	0.0059817	0.00471098
BAZ1A	Nuclear	N3	0.023499	0.962671	0.00829323	0.00553697	0.00662273	0.00547728	0.00346125	0.00793777	0.0820687	0.0817578	0.796406	0.00243871	0.00179631	0.00159836	0.0015246	0.00158228	0.00179168	0.00303449	0.00250248
BAZ1B	Nuclear	N3	0.0104942	0.974605	0.00847346	0.00642719	0.0026124	0.00166792	0.0012425	0.00497134	0.0140021	0.113034	0.844807	0.0027626	0.00168834	0.00150876	0.00142863	0.00169248	0.00215524	0.00472028	0.00170691
BAZ2A	Nuclear	N3	0.0136745	0.973782	0.00555513	0.00698801	0.00216433	0.00121126	0.00089026	0.00940862	0.0128444	0.0709307	0.888473	0.00153384	0.00108916	0.00104025	0.00100616	0.00111985	0.00129972	0.00512504	0.00186296
BAZ2B	Nuclear	Unclassified	0.00435863	0.982335	0.00250523	0.0108013	0.00070101	0.000641362	0.00100395	0.00201231	0.00503527	0.328515	0.647783	0.00100216	0.000444849	0.000515983	0.000545847	0.000502775	0.000495777	0.00800146	0.0027998
BBC3	Secretory	Unclassified	0.970617	0.00631236	0.0047066	0.0183644	0.00855703	0.736759	0.168558	0.0567425	0.00214231	0.0016243	0.00149736	0.00104839	0.000967689	0.000945782	0.000920343	0.000900952	0.000971837	0.00597678	0.0123876
BBS2	Cytosol	C1	0.0201888	0.0123345	0.958931	0.00854545	0.00598944	0.00308182	0.0049859	0.00613167	0.00376173	0.00252314	0.0038562	0.0021934	0.698136	0.155303	0.0575002	0.0193731	0.0286187	0.00169732	0.00684813
BBS4	Secretory	Unclassified	0.849794	0.0903821	0.0481248	0.0116989	0.56475	0.0528901	0.107405	0.124749	0.0713579	0.00593811	0.00892146	0.00416462	0.0295231	0.004735	0.00435102	0.00426918	0.00524648	0.00590113	0.00579776
BBS7	Cytosol	C1	0.00268452	0.0033337	0.992678	0.00130392	0.000725042	0.000624374	0.00054564	0.00078946	0.000761258	0.000867694	0.000894597	0.000810155	0.872507	0.0517623	0.0518847	0.00976699	0.00675693	0.000575654	0.000728265
BBS9	Cytosol	C1	0.00254423	0.00273465	0.993425	0.00129581	0.000695266	0.000557023	0.000532555	0.000759387	0.000635266	0.00074721	0.000759542	0.000592632	0.734165	0.180467	0.0591231	0.00960383	0.0100659	0.000553082	0.000742724
BBX	Nuclear	N1	0.0066357	0.988764	0.00328797	0.00131202	0.00285269	0.00134197	0.00118082	0.00126023	0.978811	0.0019536	0.00709351	0.000906572	0.000630685	0.000576752	0.00065248	0.000698445	0.000729605	0.000643342	0.000668677
BCAM	Secretory	Unclassified	0.98489	0.00379924	0.00394041	0.00737031	0.520635	0.0931038	0.0741866	0.296965	0.000878534	0.00106365	0.00100491	0.000852149	0.000803665	0.000752147	0.000774371	0.000767377	0.000842845	0.00634284	0.00102748
BCAP29	Secretory	Unclassified	0.972989	0.0139309	0.0055731	0.00750718	0.0488837	0.700187	0.151829	0.0720893	0.00458984	0.0058922	0.00198796	0.00146093	0.00140083	0.00111163	0.000964999	0.000971961	0.00112368	0.00537117	0.00213601
BCAP31	Secretory	S2	0.979029	0.00730984	0.0052762	0.00838465	0.0248577	0.749908	0.146014	0.0582492	0.00253675	0.00219101	0.00133941	0.00124267	0.00117174	0.00105809	0.000983126	0.000974131	0.00108912	0.0049981	0.00338655
BCAR1	Cytosol	Unclassified	0.00454034	0.00527355	0.988274	0.00191226	0.0013781	0.00100216	0.000922611	0.00123748	0.0013455	0.00123678	0.00132071	0.00137057	0.0621983	0.0104749	0.584788	0.288722	0.0420906	0.000822601	0.00108966
BCAR3	Cytosol	Unclassified	0.00398038	0.00452102	0.989783	0.00171553	0.00116982	0.000859413	0.000824415	0.00112672	0.00119594	0.00106395	0.00117328	0.00108786	0.141267	0.0122532	0.631515	0.160683	0.0440645	0.000717885	0.00099765
BCAS2	Nuclear	N1	0.0131061	0.973817	0.00997706	0.00309937	0.00478229	0.00236254	0.00266411	0.00329719	0.895329	0.0140379	0.0615968	0.00285357	0.00184868	0.00182996	0.00191537	0.00203303	0.00235001	0.00163689	0.00146248
BCAS4	Cytosol	C2	0.0068437	0.0189147	0.97139	0.00285114	0.00198839	0.00149574	0.00144885	0.00191071	0.00217827	0.00197924	0.00202016	0.012737	0.0234392	0.812891	0.0155871	0.00533956	0.114134	0.00121969	0.00163145
BCAT1	Cytosol	Unclassified	0.0109709	0.0142215	0.970795	0.00401296	0.00372166	0.00248483	0.00204297	0.00272149	0.00333557	0.00282997	0.00349126	0.00456472	0.0238359	0.018572	0.0775003	0.593111	0.257775	0.00157369	0.00243926
BCCIP	Unclassified	Unclassified	0.0245771	0.542066	0.425387	0.0079694	0.00693708	0.00478493	0.00469966	0.00815539	0.0198639	0.00994098	0.00791961	0.504342	0.0323685	0.319314	0.0112476	0.00754925	0.0549083	0.00306469	0.00490471
BCDIN3D	Cytosol	C1	0.00243316	0.00264551	0.993717	0.00120424	0.000654227	0.00052002	0.000517241	0.000741673	0.000638612	0.000714598	0.000731674	0.00056063	0.706406	0.206025	0.05496	0.00910155	0.0172249	0.000512066	0.000692175
BCKDHB	Secretory	Unclassified	0.474369	0.224241	0.0216195	0.279771	0.00931095	0.0180928	0.422508	0.0244571	0.0105897	0.0794226	0.0292579	0.104971	0.00448021	0.00441379	0.00385733	0.00400319	0.00486493	0.25062	0.0291513
BCKDK	Mitochondria	M1	0.0366108	0.101835	0.0111908	0.850363	0.00283835	0.00424858	0.0209981	0.0085258	0.00352804	0.0273181	0.0626994	0.00828977	0.00220508	0.00221643	0.0022406	0.00215013	0.00237852	0.782005	0.0683585
BCL10	Cytosol	Unclassified	0.0193525	0.0243475	0.949961	0.00633857	0.00670777	0.0046166	0.00352262	0.00450553	0.00589275	0.00456998	0.00628878	0.00759599	0.0344076	0.0195381	0.0425306	0.55369	0.299795	0.00231639	0.00402218
BCL2	Secretory	Unclassified	0.611625	0.168459	0.0392031	0.180713	0.0562543	0.0699825	0.431466	0.0539215	0.0573806	0.0247075	0.0124227	0.0739483	0.0118953	0.00708432	0.00590252	0.00611889	0.00820209	0.164746	0.0159667
BCL2L1	Mitochondria	M2	0.12484	0.00317557	0.00243108	0.869553	0.0157623	0.0305272	0.0181455	0.0604049	0.000620488	0.00106494	0.00109745	0.000392692	0.000454849	0.000471493	0.000507637	0.000501819	0.000495282	0.0587117	0.810842
BCL2L12	Secretory	Unclassified	0.9847	0.00377788	0.00338626	0.00813547	0.529645	0.0842564	0.163026	0.207773	0.00105441	0.00110951	0.00099989	0.000614073	0.000836338	0.000626642	0.000639787	0.000621893	0.0006616	0.00702941	0.00110606
BCL2L13	Mitochondria	M2	0.0271698	0.00246021	0.00297744	0.967393	0.00697203	0.00313989	0.00176463	0.0152933	0.000581568	0.000684677	0.000625634	0.000568335	0.000537227	0.00056435	0.000633096	0.000598445	0.000644318	0.00775176	0.959641
BCL3	Cytosol	C2	0.00846888	0.0211431	0.966175	0.00421254	0.00239378	0.00180354	0.00168953	0.00258204	0.00158463	0.00231972	0.00227797	0.0149608	0.130334	0.733333	0.0346846	0.00808428	0.05974	0.00177085	0.00244169
BCL7A	Nuclear	Unclassified	0.0213957	0.936167	0.0265006	0.0159369	0.00408002	0.00460373	0.00305544	0.00965649	0.0128226	0.735301	0.139502	0.0485408	0.00674681	0.00625144	0.0036621	0.00410585	0.00573441	0.00918222	0.00675466
BCL7C	Nuclear	Unclassified	0.00783632	0.981984	0.00726154	0.00291858	0.00189855	0.0015616	0.0015308	0.00284536	0.048674	0.868148	0.0287501	0.0364118	0.00155746	0.00126525	0.00139596	0.00131964	0.00172323	0.00169443	0.00122415
BCL9	Nuclear	N4	0.00767201	0.852549	0.136955	0.0028246	0.00220542	0.00161741	0.00171419	0.00213498	0.00189811	0.00326269	0.0024154	0.844972	0.00552014	0.0173627	0.00240065	0.00437867	0.107293	0.00125905	0.00156555
BCL9L	Nuclear	N4	0.0322703	0.908091	0.0482774	0.0113612	0.0111475	0.00686443	0.00569069	0.00856772	0.0137492	0.00985802	0.0127003	0.871784	0.00883382	0.00950864	0.0054529	0.00756008	0.0169219	0.00442521	0.00693598
BCLAF1	Nuclear	Unclassified	0.0071176	0.982666	0.00689762	0.00331879	0.00219876	0.00150841	0.00177124	0.00163919	0.0526075	0.811061	0.103406	0.0155916	0.00129214	0.00126735	0.00136252	0.00132036	0.00165526	0.00189576	0.00142303
BCLAF3	Nuclear	Unclassified	0.00742683	0.983262	0.00607398	0.0032374	0.0018693	0.00148441	0.00106508	0.00300804	0.0292279	0.26961	0.681803	0.0026202	0.00123176	0.00114914	0.00119717	0.00118232	0.00131359	0.00191263	0.00132477
BCOR	Nuclear	Unclassified	0.00320641	0.991409	0.00322236	0.00216218	0.000740571	0.00061471	0.00100811	0.000843018	0.012912	0.911646	0.0559095	0.0109415	0.000578377	0.000603062	0.000710598	0.000632748	0.000697578	0.0012976	0.00086458
BCR	Cytosol	C1	0.00397678	0.00387971	0.990252	0.00189111	0.00113544	0.000845845	0.000853945	0.00114155	0.000946549	0.000986181	0.00109416	0.000852825	0.717954	0.183272	0.0684733	0.0136912	0.00686285	0.000700994	0.00119012
BCS1L	Mitochondria	M2	0.253023	0.00746517	0.00812987	0.731382	0.0444262	0.0557367	0.0593268	0.0935335	0.00141011	0.00249616	0.00246293	0.00109598	0.001909	0.00182173	0.0014835	0.00150212	0.00141352	0.027959	0.703423
BDH1	Mitochondria	M2	0.0184156	0.00150593	0.00264487	0.977434	0.00471083	0.0032329	0.00153094	0.00894093	0.000308972	0.000438173	0.000361666	0.000397115	0.000501077	0.000530711	0.000560928	0.000497105	0.000555052	0.0108727	0.966561
BDH2	Cytosol	Unclassified	0.0182197	0.0248218	0.950687	0.00627194	0.00618207	0.00429781	0.00337326	0.00436658	0.00551967	0.00454758	0.00597235	0.00878216	0.0437135	0.0273942	0.0465888	0.243064	0.589926	0.00237055	0.00390139
BDNF	Cytosol	Unclassified	0.054883	0.0480588	0.865258	0.0318003	0.0143702	0.00962269	0.0130658	0.0178244	0.0121641	0.00925368	0.0170078	0.00963327	0.499146	0.183837	0.0516601	0.022631	0.107984	0.00523026	0.0265701
BDP1	Nuclear	N1	0.00279566	0.99221	0.00400563	0.000988853	0.000949568	0.000564805	0.000589609	0.000691677	0.983688	0.00315365	0.00374341	0.00162446	0.000634886	0.000725644	0.000886851	0.000872035	0.000886216	0.000457089	0.000531764
BECN1	Cytosol	Unclassified	0.00380756	0.00431824	0.990057	0.00181765	0.0010526	0.000882455	0.000801661	0.00107084	0.000917804	0.00112757	0.00114739	0.00112547	0.502918	0.360678	0.0977729	0.00896743	0.0197196	0.000785649	0.001032
BEGAIN	Unclassified	Unclassified	0.324506	0.0545838	0.54495	0.07596	0.100924	0.0531074	0.0945793	0.075895	0.0145721	0.0115836	0.0141752	0.0142529	0.333286	0.124701	0.0334127	0.0151766	0.0383733	0.0164954	0.0594646
BEND3	Nuclear	Unclassified	0.00403765	0.983324	0.00296048	0.00967814	0.000758691	0.000578498	0.000746459	0.001954	0.00503887	0.345674	0.631424	0.00118729	0.000527844	0.000588831	0.000649552	0.000592306	0.000601945	0.00725772	0.00242043
BET1	Secretory	Unclassified	0.980675	0.00434419	0.00315954	0.0118208	0.518184	0.157427	0.168312	0.136753	0.00159242	0.000979214	0.00112184	0.000650717	0.000636763	0.000613832	0.000634268	0.000622512	0.000652162	0.0110679	0.000752925
BET1L	Secretory	Unclassified	0.974218	0.00694966	0.00615551	0.0126767	0.525558	0.175755	0.0402935	0.232611	0.00209708	0.00191659	0.00143892	0.00149706	0.00140114	0.00122199	0.00111642	0.0011089	0.00130706	0.00868374	0.00399301
BFAR	Secretory	Unclassified	0.976146	0.00444966	0.00460058	0.0148035	0.0856375	0.638708	0.179323	0.0724779	0.0010667	0.0012799	0.00121011	0.000892951	0.000939713	0.000861384	0.000914182	0.00094801	0.000937291	0.00718271	0.00762076
BGN	Secretory	Unclassified	0.93485	0.0196204	0.00946231	0.0360673	0.0942178	0.0544088	0.72253	0.0636928	0.00626517	0.00547229	0.00196381	0.00591917	0.00295947	0.00185254	0.00149528	0.00144398	0.00171105	0.0341582	0.00190911
BHLHA15	Nuclear	Unclassified	0.101318	0.72588	0.141147	0.0316555	0.0280906	0.024604	0.0156432	0.0329801	0.0940837	0.357796	0.156931	0.117068	0.0328181	0.0279303	0.017665	0.0329809	0.0297526	0.0112861	0.0203694
BHLHE40	Unclassified	Unclassified	0.500643	0.416825	0.0336726	0.0488593	0.0222011	0.0254057	0.43214	0.0208965	0.0878581	0.178677	0.0328286	0.117461	0.006915	0.00625826	0.00581468	0.00637496	0.00830969	0.034354	0.0145052
BHMT	Unclassified	Unclassified	0.172044	0.185109	0.56541	0.0774376	0.0597897	0.0413115	0.0288302	0.0421122	0.0451904	0.0336379	0.0591119	0.0471692	0.102577	0.19955	0.066014	0.129853	0.0674159	0.0184217	0.0590158
BICC1	Cytosol	C1	0.0112793	0.00769474	0.977071	0.00395533	0.00389061	0.00211829	0.00233656	0.00293385	0.00223284	0.00168688	0.00197016	0.00180486	0.65252	0.256413	0.0401737	0.0124446	0.0155195	0.00120487	0.00275046
BICD1	Cytosol	C2	0.00394677	0.00645512	0.987711	0.00188732	0.00108481	0.000855639	0.000861389	0.00114493	0.00103332	0.00115448	0.00115138	0.00311594	0.0657505	0.745511	0.0265645	0.00525463	0.14463	0.000798176	0.00108914
BICD2	Cytosol	Unclassified	0.00406669	0.00541138	0.988767	0.00175479	0.00116847	0.000944994	0.000871941	0.00108129	0.001123	0.00113102	0.00119236	0.00196501	0.0323391	0.0411087	0.12384	0.106784	0.684695	0.000798806	0.00095598
BICRAL	Nuclear	Unclassified	0.0463416	0.892305	0.0471023	0.0142507	0.0158194	0.0110336	0.00758442	0.0119041	0.0825768	0.626087	0.128028	0.0556131	0.00960615	0.00723638	0.0073124	0.00911121	0.0138361	0.00557742	0.00867327
BID	Cytosol	Unclassified	0.00299617	0.00323416	0.992422	0.00134767	0.000837071	0.000670013	0.00064528	0.000843802	0.000830436	0.000807932	0.000859485	0.000736307	0.336061	0.0232919	0.568693	0.0465301	0.0178463	0.000581956	0.000765717
BIN1	Cytosol	Unclassified	0.00478261	0.00610951	0.987127	0.00198093	0.00148792	0.0010766	0.000963281	0.00125481	0.00141864	0.0013326	0.00142085	0.00193743	0.0221314	0.0202	0.119214	0.585721	0.239861	0.000862043	0.00111889
BIRC2	Cytosol	Unclassified	0.0031551	0.00363791	0.991805	0.00140192	0.000915714	0.000691063	0.000648188	0.000900136	0.000884495	0.00090743	0.00091814	0.000927849	0.146031	0.0137323	0.716238	0.0959624	0.0198413	0.000615048	0.000786872
BIRC5	Nuclear	Unclassified	0.0780134	0.838057	0.0373858	0.046544	0.0114965	0.0178406	0.0133959	0.0352805	0.0247535	0.145519	0.658142	0.00964206	0.01028	0.00841842	0.00532247	0.00570134	0.00766351	0.016179	0.030365
BIRC6	Cytosol	C1	0.00565461	0.00709604	0.984784	0.00246572	0.00163229	0.00128709	0.00111904	0.0016162	0.00176035	0.00166867	0.00190485	0.00176216	0.826907	0.0400929	0.0908212	0.0198032	0.00715958	0.000990616	0.00147511
BLM	Nuclear	N1	0.0063345	0.98918	0.0032451	0.00123998	0.00301808	0.000931966	0.00126991	0.00111455	0.935418	0.00302585	0.0500644	0.00067175	0.000612387	0.000648914	0.000682334	0.000646561	0.000654906	0.000727123	0.000512858
BLMH	Cytosol	Unclassified	0.00586454	0.00724178	0.984503	0.00239056	0.001844	0.00129432	0.00117552	0.00155071	0.00170352	0.00158398	0.0017288	0.00222548	0.0541099	0.03137	0.25661	0.400833	0.24158	0.00100703	0.00138353
BLOC1S1	Secretory	Unclassified	0.696028	0.137318	0.154662	0.0119919	0.523143	0.0345317	0.0790519	0.0593013	0.112936	0.00717273	0.00824421	0.00896494	0.116696	0.0117821	0.00759484	0.00737001	0.0112184	0.00628037	0.00571149
BLOC1S2	Cytosol	C1	0.0563107	0.0369118	0.897172	0.00960572	0.0250266	0.0101971	0.00995505	0.011132	0.0160472	0.00519586	0.00661527	0.00905343	0.70552	0.108224	0.0346154	0.0139204	0.0348919	0.00341032	0.0061954
BLOC1S5	Cytosol	Unclassified	0.0101428	0.0209491	0.964806	0.0041025	0.00300898	0.00239378	0.00210638	0.00263366	0.00289063	0.00278915	0.00316928	0.0121001	0.01336	0.123291	0.0254989	0.104213	0.698443	0.00176577	0.00233673
BLVRA	Cytosol	Unclassified	0.00754929	0.0118575	0.977725	0.00286822	0.00251529	0.00167854	0.00142661	0.00192886	0.00229762	0.00201498	0.00237668	0.00516826	0.0174317	0.0271813	0.0335837	0.225513	0.674015	0.00114861	0.00171962
BLZF1	Unclassified	Unclassified	0.468307	0.00929026	0.0101119	0.512291	0.142044	0.0362763	0.209732	0.0802541	0.00178296	0.00290003	0.00229678	0.00231049	0.00213821	0.00200551	0.00191212	0.00192486	0.00213121	0.131776	0.380514
BMP1	Secretory	Unclassified	0.646736	0.288073	0.0179856	0.0472059	0.0187658	0.0221295	0.571231	0.0346092	0.040674	0.0919802	0.014615	0.140803	0.00414723	0.0037004	0.00302489	0.00306479	0.00404829	0.0371248	0.010081
BMP10	Cytosol	Unclassified	0.00567411	0.00726916	0.984704	0.00235298	0.00174517	0.00128463	0.00114629	0.00149801	0.00173073	0.00159278	0.00172151	0.00222414	0.0241335	0.0152912	0.108358	0.531225	0.305696	0.00100954	0.00134344
BMP2K	Secretory	Unclassified	0.977101	0.00332069	0.00392931	0.0156494	0.39011	0.190628	0.256947	0.139416	0.000783321	0.00112353	0.000910931	0.000502909	0.00109342	0.00074908	0.000717328	0.000672702	0.000696776	0.0119454	0.003704
BMPR1A	Secretory	Unclassified	0.982198	0.00299489	0.00302268	0.0117841	0.443877	0.205054	0.0655858	0.267682	0.000814478	0.000836026	0.000728552	0.000615835	0.000608758	0.000627291	0.000617189	0.000564124	0.000605315	0.010777	0.00100702
BMPR2	Secretory	Unclassified	0.975956	0.00810279	0.00915859	0.00678228	0.582588	0.0729234	0.149121	0.171323	0.00310074	0.00168596	0.00179182	0.00152427	0.00293288	0.00160144	0.00149579	0.0014778	0.00165068	0.00456445	0.00221783
BMS1	Nuclear	N3	0.006828	0.986518	0.00445782	0.0021959	0.00205607	0.0012879	0.000942862	0.00254116	0.0614349	0.0553335	0.868501	0.00124891	0.000929466	0.000856166	0.000870244	0.000870269	0.000931675	0.00132546	0.000870434
BNC2	Nuclear	Unclassified	0.0092217	0.974716	0.00914006	0.0069221	0.002674	0.00217588	0.00152925	0.00284256	0.00790102	0.882474	0.0786551	0.00568572	0.00173891	0.00161154	0.00167505	0.00179573	0.00231882	0.00416319	0.00275891
BNIP1	Secretory	Unclassified	0.986778	0.00295999	0.00260012	0.00766187	0.0501517	0.669369	0.202053	0.0652047	0.00104225	0.000718883	0.000678479	0.000520384	0.000449243	0.000540606	0.000534602	0.000529661	0.000546013	0.00601366	0.00164821
BNIP2	Cytosol	C1	0.00560129	0.00696558	0.985043	0.00239025	0.00165086	0.00131356	0.00111685	0.00152002	0.00162209	0.00161111	0.00183674	0.00189564	0.818722	0.047123	0.0940182	0.0169284	0.00825163	0.000979001	0.00141125
BNIP3	Mitochondria	M2	0.0274012	0.00337658	0.00564621	0.963576	0.00839566	0.00291332	0.00362185	0.0124704	0.000658304	0.000999826	0.000857247	0.000861201	0.00108229	0.00114063	0.00109146	0.00106669	0.00126515	0.0771828	0.886393
BNIP3L	Mitochondria	M2	0.0678744	0.0047312	0.00626003	0.921134	0.0122117	0.0173089	0.00987684	0.028477	0.00109962	0.00127765	0.00103048	0.00132346	0.00132571	0.0012525	0.00120784	0.00111912	0.00135487	0.00576192	0.915372
BOD1	Cytosol	Unclassified	0.0163357	0.0219309	0.955841	0.00589236	0.00524854	0.00395588	0.00318686	0.00394439	0.00477752	0.00425954	0.00537833	0.00751548	0.162059	0.117983	0.0642296	0.0804999	0.53107	0.00233656	0.0035558
BOD1L1	Nuclear	N4	0.0255617	0.922985	0.0432166	0.00823692	0.0088405	0.00593265	0.00449581	0.0062927	0.00952387	0.00873421	0.00935134	0.895375	0.00626225	0.0104475	0.00425639	0.00553634	0.0167141	0.00335978	0.00487714
BOK	Secretory	Unclassified	0.6728	0.0291899	0.0106263	0.287383	0.0491973	0.205492	0.27407	0.144041	0.00348166	0.0105147	0.0133201	0.0018735	0.0025124	0.00214599	0.00193384	0.00200043	0.00203365	0.11715	0.170234
BOLA1	Cytosol	Unclassified	0.0392725	0.047817	0.900057	0.012853	0.0136259	0.00922872	0.00728732	0.00913055	0.0115749	0.00899425	0.0124611	0.0147867	0.559312	0.0794362	0.0777308	0.0627273	0.120851	0.00475163	0.00810136
BOP1	Nuclear	Unclassified	0.00378619	0.990545	0.00372069	0.00194815	0.00101665	0.000715982	0.000978573	0.00107498	0.0415482	0.87576	0.0592985	0.0139384	0.000689343	0.000655217	0.000797434	0.000736647	0.000842053	0.00122844	0.000719706
BORA	Cytosol	Unclassified	0.00659733	0.00922802	0.981528	0.00264686	0.00202297	0.00152942	0.00134088	0.00170406	0.00191027	0.00180208	0.00204625	0.00346942	0.0196565	0.0244499	0.0722419	0.203202	0.661978	0.0011411	0.00150576
BORCS5	Secretory	S1	0.810187	0.129129	0.046548	0.014136	0.605171	0.0498665	0.0801808	0.0749692	0.103162	0.00804133	0.00968128	0.00824434	0.0204223	0.0062369	0.00566683	0.00616191	0.0080601	0.0074331	0.00670291
BORCS6	Secretory	Unclassified	0.885417	0.0720872	0.0302934	0.0122021	0.604912	0.0775552	0.115795	0.0871554	0.0503716	0.00696676	0.00787123	0.00687763	0.010334	0.00462088	0.00431221	0.00488071	0.00614564	0.00722539	0.00497667
BPHL	Mitochondria	Unclassified	0.110379	0.201252	0.0926347	0.595734	0.0293834	0.0254041	0.0231834	0.0324084	0.0274124	0.0309713	0.0415365	0.101332	0.0192913	0.0168033	0.0135035	0.0174059	0.0256307	0.565536	0.0301985
BPNT1	Cytosol	Unclassified	0.0031307	0.00347772	0.99197	0.00142206	0.000875515	0.000680349	0.000669501	0.000905331	0.000891686	0.000849191	0.000903819	0.000833021	0.231573	0.0132897	0.638219	0.0660267	0.0428619	0.000605786	0.000816269
BPTF	Nuclear	N2	0.00337579	0.990355	0.004179	0.00209041	0.000896807	0.000726813	0.000775288	0.000976883	0.0046733	0.95264	0.0133407	0.0197009	0.000752441	0.000760919	0.000888773	0.000833498	0.000943371	0.00111443	0.000975981
BRAF	Cytosol	Unclassified	0.00871636	0.0104963	0.977407	0.00338001	0.00289656	0.00187899	0.00167785	0.00226296	0.00254637	0.00225368	0.00255645	0.00313979	0.102551	0.0175164	0.210592	0.480674	0.166074	0.00135041	0.0020296
BRAP	Cytosol	Unclassified	0.00421338	0.00519251	0.988729	0.00186523	0.00117614	0.000951477	0.000911443	0.00117432	0.00117063	0.00114626	0.00122844	0.00164718	0.0703951	0.0710354	0.24315	0.0723206	0.531828	0.000817465	0.00104776
BRCA1	Nuclear	N1	0.010774	0.98007	0.00648089	0.00267457	0.00429576	0.00150217	0.00256189	0.00241422	0.880644	0.0698188	0.00665377	0.0229539	0.00129786	0.00118735	0.00129501	0.00126272	0.00143795	0.00146016	0.00121441
BRCC3	Cytosol	Unclassified	0.0105237	0.0117225	0.974206	0.00354771	0.00270881	0.00200172	0.0018751	0.0039381	0.00311727	0.00278155	0.00338462	0.0024391	0.589069	0.281718	0.0372536	0.0155839	0.0505821	0.00117902	0.00236869
BRD1	Nuclear	N3	0.0130004	0.970966	0.00897636	0.0070573	0.00303969	0.00214964	0.00155934	0.00625173	0.01568	0.135125	0.817254	0.00290647	0.00172061	0.00162662	0.00155879	0.00187584	0.0021945	0.00432797	0.00272933
BRD2	Nuclear	N4	0.0452778	0.884103	0.0541924	0.0164267	0.0153239	0.0107718	0.00769593	0.0114862	0.0187594	0.24705	0.0249037	0.59339	0.0109614	0.0109745	0.00732719	0.00941902	0.0155103	0.00722897	0.0091977
BRD3	Nuclear	N4	0.0416628	0.886734	0.057223	0.0143797	0.0148117	0.00960368	0.00667993	0.0105675	0.0150981	0.0577013	0.0187303	0.795205	0.0123168	0.0125024	0.00663116	0.00930785	0.0164648	0.00647982	0.00789989
BRD4	Nuclear	Unclassified	0.069405	0.820325	0.0858175	0.0244528	0.0249604	0.0163442	0.0108068	0.0172936	0.0266767	0.190673	0.0357076	0.567268	0.0187492	0.0169945	0.0105558	0.0146914	0.0248266	0.011075	0.0133778
BRD7	Nuclear	N3	0.00604837	0.987482	0.00455747	0.00191184	0.00198105	0.00130956	0.00111612	0.00164165	0.106771	0.126512	0.752406	0.00179275	0.000920603	0.000847388	0.000920496	0.000907641	0.00096134	0.00116749	0.000744351
BRD8	Nuclear	N4	0.00646121	0.980462	0.0107763	0.00230031	0.00176307	0.00130641	0.00129637	0.00209536	0.00288631	0.016636	0.0025117	0.958428	0.00161375	0.00387441	0.00126112	0.00128418	0.00274284	0.00106854	0.00123176
BRF1	Unclassified	Unclassified	0.418805	0.341793	0.186273	0.0531286	0.102426	0.0479977	0.121305	0.147077	0.046171	0.0429913	0.0198875	0.232743	0.0918163	0.0424554	0.0132774	0.0095615	0.0291625	0.027061	0.0260675
BRI3BP	Secretory	Unclassified	0.715868	0.0527497	0.0208871	0.210495	0.0340176	0.4294	0.0889365	0.163514	0.017986	0.018036	0.0110524	0.00567526	0.0047219	0.00389654	0.0035853	0.00392009	0.00476322	0.00834847	0.202146
BRIP1	Nuclear	N4	0.0192236	0.925152	0.0506288	0.00499589	0.00427383	0.00254391	0.00352371	0.00888214	0.00791391	0.0103865	0.00393973	0.902912	0.00907494	0.0279335	0.00272189	0.00204601	0.0088525	0.00216859	0.0028273
BRIX1	Nuclear	N3	0.00918864	0.9808	0.00685311	0.00315871	0.00228126	0.00171805	0.00125899	0.00393034	0.0533041	0.0719428	0.853377	0.00217594	0.00139876	0.00123692	0.00128896	0.00137368	0.0015548	0.00184794	0.00131077
BRK1	Cytosol	C1	0.0187615	0.0182557	0.957864	0.00511919	0.00717839	0.00390461	0.00366291	0.00401557	0.00771382	0.00284853	0.00406275	0.00363063	0.815864	0.0670585	0.039783	0.0135342	0.0216234	0.00166545	0.00345374
BRMS1L	Nuclear	N1	0.00601891	0.987623	0.00484104	0.00151749	0.0030784	0.000892444	0.000856045	0.00119203	0.799096	0.145323	0.036477	0.00672666	0.000827012	0.000928027	0.00103512	0.000987981	0.0010629	0.000874717	0.000642775
BROX	Cytosol	Unclassified	0.00348511	0.00414484	0.990819	0.0015507	0.000995726	0.00076902	0.000742086	0.00097828	0.000991593	0.000974171	0.00102075	0.00115832	0.0621439	0.0259684	0.455913	0.169369	0.277425	0.000677844	0.000872853
BRPF1	Nuclear	N3	0.00396109	0.989621	0.00358333	0.0028343	0.000923737	0.000624084	0.000502424	0.00191084	0.0114176	0.162419	0.814536	0.00124792	0.000678511	0.00067632	0.000691299	0.000740225	0.000796973	0.00203555	0.000798749
BRWD1	Nuclear	N3	0.0197118	0.95132	0.0116271	0.0173409	0.00478734	0.00258745	0.00193092	0.0104061	0.013387	0.0770039	0.857463	0.00346661	0.00243403	0.00211854	0.00193285	0.00225513	0.00288654	0.0137852	0.00355571
BRWD3	Unclassified	Unclassified	0.15537	0.551162	0.253792	0.0396759	0.0293154	0.0328273	0.0216214	0.0716059	0.0675078	0.170902	0.268146	0.0446059	0.102078	0.051317	0.0244161	0.0308377	0.0451435	0.011639	0.0280368
BSCL2	Secretory	Unclassified	0.824798	0.0443784	0.0322219	0.0986014	0.0847731	0.207269	0.402531	0.130226	0.00749876	0.0192152	0.0132665	0.00439793	0.0126876	0.00660345	0.00431458	0.00361131	0.00500498	0.031482	0.0671194
BSDC1	Cytosol	C1	0.00298767	0.0034497	0.992126	0.00143637	0.00081993	0.000680936	0.000620256	0.000866551	0.000775527	0.000888423	0.000936543	0.000849207	0.726532	0.188047	0.0558016	0.0087567	0.0129897	0.000617376	0.000818994
BSG	Secretory	Unclassified	0.975572	0.00173893	0.00210817	0.0205805	0.488437	0.15293	0.14151	0.192695	0.000338547	0.000609796	0.000446604	0.000343988	0.000406792	0.000412942	0.000449645	0.000428875	0.000409918	0.0188752	0.00170538
BST2	Secretory	Unclassified	0.984962	0.00386957	0.00373575	0.00743222	0.5529	0.105309	0.147209	0.179544	0.00123479	0.000927314	0.00095475	0.000752708	0.000864983	0.000688975	0.000713094	0.00071941	0.00074929	0.00652658	0.000905647
BTBD1	Unclassified	Unclassified	0.392604	0.449034	0.148739	0.00962339	0.292201	0.0215926	0.0311863	0.0476238	0.426425	0.00700627	0.00926323	0.00633927	0.122452	0.00651674	0.00566777	0.00558861	0.00851349	0.00445782	0.00516558
BTBD10	Cytosol	Unclassified	0.0346019	0.0446726	0.909924	0.0108017	0.0113411	0.00834392	0.00619198	0.0087249	0.0110251	0.00852649	0.011429	0.0136921	0.557133	0.221187	0.0539324	0.0200358	0.0576363	0.00398579	0.00681589
BTBD2	Nuclear	N1	0.198243	0.753338	0.0418563	0.00656316	0.132744	0.0123701	0.0210269	0.032102	0.736314	0.00534317	0.00867346	0.00300762	0.0299884	0.00305279	0.00270963	0.00245771	0.00364777	0.0030773	0.00348586
BTBD3	Secretory	Unclassified	0.852905	0.0949865	0.0393419	0.012767	0.519662	0.0557259	0.171285	0.106232	0.0764147	0.00796623	0.00553078	0.0050748	0.0254253	0.00392045	0.00316519	0.00280118	0.00402971	0.00770359	0.00506337
BTBD6	Cytosol	Unclassified	0.0931244	0.149663	0.72984	0.0273728	0.0344146	0.0222997	0.0156036	0.0208064	0.0304269	0.0219579	0.0346844	0.0625939	0.0285509	0.0373773	0.0219073	0.082408	0.559596	0.00904355	0.0183292
BTBD7	Cytosol	C2	0.0037534	0.00388357	0.990612	0.00175139	0.00106285	0.000810769	0.000800201	0.00107958	0.00083377	0.00104029	0.000905396	0.00110412	0.247524	0.66575	0.0474395	0.00838059	0.0215174	0.000776445	0.000974946
BTD	Nuclear	N4	0.0119159	0.956441	0.0274123	0.00423064	0.00299191	0.00207706	0.00262618	0.00422077	0.00340573	0.00719867	0.00381304	0.942024	0.00303533	0.0163036	0.00189245	0.00197793	0.00420299	0.00187661	0.00235403
BTF3	Cytosol	Unclassified	0.00678478	0.0222411	0.968207	0.00276683	0.00203773	0.00153179	0.00137133	0.00184393	0.00201868	0.00196509	0.00212848	0.0161289	0.0218394	0.0347825	0.0388051	0.129912	0.742868	0.0011784	0.00158843
BTF3L4	Cytosol	C5	0.00475435	0.0121393	0.981161	0.00194573	0.0014592	0.00106114	0.000950431	0.00128358	0.00143291	0.00139687	0.0015027	0.0078068	0.0147422	0.0222221	0.0317702	0.154	0.758426	0.000850438	0.0010953
BTG3	Nuclear	Unclassified	0.198198	0.732666	0.042962	0.0261746	0.029185	0.020614	0.12377	0.0246291	0.177463	0.0605648	0.0163352	0.478303	0.0101381	0.00744168	0.00630522	0.00738381	0.0116932	0.0159161	0.0102585
BTN2A1	Secretory	Unclassified	0.941959	0.00942248	0.0177553	0.0308633	0.421524	0.14952	0.231571	0.139343	0.00283441	0.00235597	0.00256205	0.00167005	0.00724978	0.00332506	0.00258719	0.00225033	0.00234293	0.00809442	0.0227689
BTN3A2	Secretory	S1	0.968982	0.00841224	0.0116325	0.0109733	0.611597	0.128935	0.0924064	0.136044	0.00220274	0.00211757	0.00204704	0.00204489	0.00311089	0.0022575	0.00196998	0.00200561	0.00228857	0.00498115	0.00599218
BUB1	Cytosol	C2	0.0056962	0.00921632	0.982149	0.00293897	0.00156889	0.00121328	0.00115881	0.00175522	0.00122818	0.00164484	0.00185441	0.00448889	0.157379	0.698626	0.0319964	0.00766134	0.0864854	0.001157	0.00178197
BUB1B	Cytosol	Unclassified	0.00884754	0.0105731	0.977136	0.0034438	0.00278387	0.00203725	0.0017532	0.00227322	0.00259068	0.00230186	0.00268858	0.00299201	0.0863727	0.0157167	0.518028	0.332155	0.0248628	0.00140363	0.00204016
BUB3	Nuclear	N4	0.0129671	0.791491	0.190781	0.0047603	0.0037507	0.00269925	0.00267188	0.00384523	0.00426043	0.00553293	0.00433524	0.777363	0.00717213	0.0584225	0.00425472	0.00561228	0.11532	0.00194454	0.00281576
BUD13	Nuclear	Unclassified	0.00922695	0.982704	0.00580099	0.00226781	0.00398115	0.00159824	0.00172737	0.00192018	0.416357	0.0735728	0.490529	0.00224456	0.00115488	0.00109181	0.00116318	0.00114208	0.00124904	0.0013642	0.000903605
BUD31	Nuclear	Unclassified	0.0697268	0.743451	0.1628	0.0240218	0.0201524	0.0141912	0.0118661	0.0235171	0.0309798	0.148601	0.0455089	0.518361	0.0338781	0.0459306	0.0145651	0.0168842	0.0515424	0.00921175	0.01481
BZW1	Cytosol	Unclassified	0.0030446	0.00356662	0.992045	0.00134408	0.000875456	0.000675785	0.00064823	0.000845133	0.000867531	0.000850165	0.00087382	0.000975109	0.0434288	0.0179504	0.468243	0.225147	0.237276	0.000602242	0.000741841
BZW2	Cytosol	Unclassified	0.00401905	0.00461305	0.989647	0.0017212	0.00119637	0.000884633	0.000829776	0.00110827	0.00116467	0.00109697	0.0011631	0.0011883	0.083143	0.010771	0.618941	0.240433	0.0363591	0.000743354	0.00097785
C10orf76	Cytosol	Unclassified	0.00564892	0.00526634	0.986238	0.00284691	0.00154941	0.00121151	0.00129582	0.00159217	0.0010952	0.00131282	0.00136278	0.00149553	0.285391	0.614134	0.0534163	0.0113184	0.0219781	0.00100735	0.00183956
C10orf88	Cytosol	Unclassified	0.0074545	0.00780205	0.981307	0.00343608	0.00213279	0.00174759	0.00161457	0.00195956	0.00175383	0.00182293	0.00221379	0.0020115	0.570863	0.29333	0.0799696	0.0165212	0.0206244	0.00119902	0.00223707
C11orf54	Cytosol	Unclassified	0.023935	0.0313766	0.936906	0.00778247	0.00835599	0.00569981	0.00426579	0.00561346	0.00741609	0.00576117	0.00806432	0.010135	0.0213432	0.0206846	0.0650252	0.358505	0.471348	0.00276073	0.00502174
C11orf58	Unclassified	Unclassified	0.0617541	0.272427	0.645337	0.0204824	0.021547	0.0141472	0.0110052	0.0150547	0.0232037	0.015697	0.0220253	0.211501	0.0320645	0.0232365	0.0188281	0.0388431	0.532365	0.00736448	0.0131179
C11orf74	Cytosol	Unclassified	0.00279879	0.0029453	0.992902	0.001354	0.000762248	0.000597108	0.000620021	0.000819418	0.000749962	0.000757097	0.000832963	0.000605274	0.544746	0.0524525	0.331186	0.0416465	0.0228712	0.000539662	0.000814335
C11orf98	Nuclear	N1	0.0363384	0.925472	0.0289563	0.00923355	0.0131481	0.00954121	0.00622331	0.00742585	0.878126	0.0114605	0.0266321	0.00925283	0.00595903	0.00466282	0.00454713	0.00576043	0.00802688	0.00346369	0.00576986
C12orf10	Cytosol	Unclassified	0.00634202	0.0112456	0.979911	0.0025011	0.00200886	0.00143635	0.00126069	0.00163612	0.00190687	0.00176633	0.00197061	0.00560183	0.015217	0.0267826	0.0240295	0.167199	0.746683	0.00105923	0.00144187
C12orf29	Cytosol	Unclassified	0.0039678	0.00605244	0.988288	0.00169193	0.00117109	0.000915385	0.0008265	0.00105483	0.00111332	0.00113212	0.00121234	0.00259466	0.0170441	0.0445733	0.0656138	0.189624	0.671432	0.000757135	0.000934793
C12orf4	Cytosol	C2	0.00373198	0.00446917	0.989967	0.00183208	0.00100982	0.000852615	0.000827197	0.00104235	0.000919262	0.00117733	0.00111842	0.00125416	0.194142	0.647222	0.0684036	0.00670927	0.07349	0.000831732	0.00100035
C12orf43	Nuclear	N4	0.0126555	0.96621	0.0169784	0.00415566	0.00404241	0.00285719	0.00267758	0.00307828	0.00486737	0.00818707	0.00476503	0.948391	0.00274054	0.00437686	0.00225777	0.00275436	0.00484887	0.00171979	0.00243587
C12orf45	Cytosol	Unclassified	0.0261073	0.208905	0.755293	0.00969418	0.0078815	0.00611506	0.00528863	0.00682209	0.007862	0.00708867	0.00809784	0.185857	0.019264	0.126864	0.0168571	0.0266193	0.565689	0.00389967	0.00579452
C12orf49	Cytosol	Unclassified	0.0670594	0.0289653	0.870504	0.0334716	0.0211097	0.00980561	0.0193255	0.0168186	0.00715471	0.00560217	0.0103643	0.00584414	0.335509	0.400785	0.0681092	0.0340259	0.0320747	0.00458145	0.0288901
C12orf57	Cytosol	Unclassified	0.0150977	0.0190956	0.960358	0.00544853	0.00509332	0.00343305	0.00284901	0.00372229	0.00448998	0.00380217	0.00469342	0.00611	0.0578234	0.0245966	0.120453	0.460211	0.297275	0.00210159	0.00334694
C12orf65	Secretory	Unclassified	0.836491	0.0891898	0.00697132	0.0673477	0.0306122	0.259858	0.499	0.0470206	0.0199878	0.0439408	0.0222444	0.00301678	0.0014664	0.00132092	0.00139193	0.00140239	0.00138968	0.0589732	0.00837446
C12orf73	Mitochondria	M2	0.0862756	0.0269185	0.0133917	0.873414	0.0149497	0.015951	0.0144923	0.0408827	0.00530909	0.00825899	0.00976376	0.00358667	0.0029263	0.00258709	0.00237752	0.00243309	0.00306767	0.0302289	0.843185
C14orf119	Unclassified	Unclassified	0.123565	0.163314	0.677356	0.035765	0.0464552	0.0296376	0.0200359	0.0274359	0.0409438	0.0281568	0.0466518	0.047562	0.0437063	0.0337249	0.0694992	0.395821	0.134604	0.0117162	0.0240489
C14orf93	Nuclear	Unclassified	0.0175743	0.953181	0.0155187	0.0137261	0.00514779	0.00357692	0.00258678	0.00626284	0.0359856	0.198219	0.712869	0.00610744	0.00314472	0.00272166	0.00270624	0.00313556	0.00381047	0.00955515	0.00417092
C15orf39	Unclassified	Unclassified	0.116597	0.609847	0.231199	0.042357	0.0239127	0.0142721	0.0221529	0.0562592	0.0162667	0.0302801	0.0195501	0.54375	0.0613199	0.108089	0.0121765	0.00781193	0.0418016	0.0161965	0.0261605
C15orf40	Cytosol	Unclassified	0.00656999	0.00834986	0.982465	0.00261467	0.00206169	0.00148218	0.00130763	0.0017185	0.001939	0.00178481	0.00199024	0.00263581	0.0631749	0.0150342	0.257382	0.127298	0.519576	0.00111003	0.00150465
C15orf41	Cytosol	Unclassified	0.00307514	0.0033281	0.992165	0.00143214	0.000844847	0.000644249	0.000657624	0.000928421	0.000875904	0.000847287	0.00092554	0.000679365	0.50763	0.037831	0.389889	0.0463379	0.0104769	0.000568758	0.000863378
C16orf72	Nuclear	N4	0.0300213	0.923914	0.0398564	0.00620851	0.00847507	0.00456057	0.00608976	0.0108959	0.0389074	0.0142436	0.00544087	0.865322	0.0117095	0.01221	0.00322081	0.00292881	0.0097872	0.00298295	0.00322557
C16orf87	Nuclear	N4	0.0776531	0.792451	0.106697	0.0231996	0.0277669	0.0176439	0.0130793	0.0191629	0.0609797	0.0294085	0.030883	0.671179	0.0173441	0.0244931	0.0121912	0.017316	0.0353524	0.00831999	0.0148796
C16orf91	Mitochondria	M2	0.0389611	0.0012615	0.00202231	0.957755	0.0188234	0.00391711	0.00187559	0.014345	0.000286431	0.000357278	0.00030443	0.000313365	0.000376916	0.000398713	0.000429123	0.000404243	0.000413311	0.00602522	0.95173
C17orf49	Nuclear	Unclassified	0.00309877	0.991555	0.00338616	0.00195984	0.000762073	0.00050728	0.00119234	0.000637077	0.0148087	0.895768	0.0677518	0.0132268	0.000573705	0.000602602	0.000738649	0.000680741	0.000790459	0.00122954	0.000730298
C17orf53	Cytosol	Unclassified	0.00347421	0.00512922	0.989889	0.0015074	0.00100836	0.000798757	0.000730286	0.000936804	0.000939706	0.000996453	0.00105083	0.00214223	0.0234299	0.0397865	0.125456	0.124811	0.676405	0.000688135	0.00081927
C17orf62	Secretory	Unclassified	0.973607	0.00244241	0.00255309	0.0213973	0.0332965	0.686275	0.191991	0.062045	0.000567241	0.000759491	0.000675228	0.000440449	0.000416045	0.00051028	0.000552761	0.000554035	0.00051997	0.0156159	0.00578144
C17orf80	Mitochondria	M2	0.0120362	0.00370752	0.00220484	0.982051	0.00266216	0.000863998	0.000830123	0.00767988	0.000594679	0.00112144	0.00159996	0.000391447	0.000365551	0.000421106	0.00047773	0.000452311	0.000488142	0.0150714	0.96698
C17orf97	Cytosol	Unclassified	0.0869578	0.155566	0.736047	0.0214294	0.0332846	0.0192038	0.0141871	0.0202823	0.0892894	0.0161743	0.0264202	0.023682	0.583926	0.0378925	0.0271545	0.0247451	0.0623286	0.00736356	0.0140659
C18orf25	Nuclear	N4	0.043747	0.684866	0.256727	0.0146603	0.0153059	0.00959304	0.00795598	0.0108921	0.0181312	0.01316	0.0164617	0.637113	0.0160726	0.0139722	0.00899777	0.0151022	0.202582	0.00530446	0.00935582
C18orf32	Secretory	Unclassified	0.969181	0.00513434	0.00352508	0.0221593	0.0873557	0.350115	0.460731	0.0709796	0.00162592	0.00130681	0.00141266	0.000788948	0.000709106	0.0006892	0.000721085	0.000689972	0.000715717	0.0205318	0.0016275
C19orf25	Secretory	S3	0.956267	0.0244559	0.00584164	0.0134357	0.0182728	0.0612487	0.858713	0.0180319	0.0129927	0.0059353	0.0040183	0.00150961	0.00116093	0.0011176	0.00119322	0.00115944	0.00121046	0.0117381	0.00169752
C19orf33	Cytosol	Unclassified	0.0230078	0.0589421	0.91	0.00804999	0.00757746	0.00547944	0.00435373	0.00559719	0.0072722	0.00610676	0.0076442	0.0379189	0.0218847	0.0302481	0.0346734	0.172995	0.650199	0.00307785	0.00497214
C19orf47	Nuclear	Unclassified	0.00228982	0.993488	0.00267286	0.00154884	0.000678524	0.0004096	0.000448063	0.000753634	0.0172449	0.362341	0.612427	0.00147601	0.000482319	0.000512776	0.000593893	0.000535849	0.000548027	0.00109641	0.000452426
C19orf53	Nuclear	N1	0.0297134	0.944308	0.0193807	0.00659827	0.0112665	0.00787242	0.00509088	0.00548368	0.912836	0.00758186	0.0177223	0.00616718	0.00398363	0.00313601	0.00314378	0.00386077	0.0052565	0.00259155	0.00400672
C19orf57	Cytosol	Unclassified	0.0276166	0.130306	0.831972	0.0101051	0.00890357	0.00649042	0.00531343	0.00690918	0.00755334	0.00689958	0.00868953	0.107163	0.0656491	0.0495807	0.0589234	0.0528714	0.604948	0.00413854	0.00596654
C19orf66	Unclassified	Unclassified	0.0605384	0.303623	0.625263	0.0105751	0.0238695	0.0106276	0.010518	0.0155233	0.274288	0.00789012	0.0123941	0.00905127	0.542952	0.0215176	0.0170346	0.0123815	0.0313778	0.00385529	0.0067198
C19orf70	Mitochondria	M2	0.0556577	0.034547	0.018386	0.891409	0.0109846	0.00978814	0.00581214	0.0290728	0.00820879	0.00774389	0.0127857	0.00580865	0.0040675	0.00347763	0.0030299	0.00334849	0.00446246	0.0128243	0.878585
C1D	Nuclear	N1	0.0310908	0.950063	0.0135126	0.00533358	0.0126716	0.00529719	0.00527948	0.00784253	0.92783	0.00404914	0.0147582	0.00342595	0.00329002	0.00222864	0.00231748	0.00259069	0.00308573	0.00244767	0.00288592
C1GALT1	Secretory	Unclassified	0.983153	0.00309711	0.00357635	0.0101731	0.496476	0.0777765	0.0354722	0.373429	0.000615369	0.000895915	0.000795228	0.000790595	0.000701435	0.000729921	0.000718208	0.000679781	0.000747001	0.00874454	0.00142851
C1GALT1C1	Secretory	Unclassified	0.983497	0.00223706	0.00259985	0.0116664	0.533794	0.1351	0.0576781	0.256926	0.000485085	0.000646687	0.000574354	0.000530932	0.00047804	0.000525029	0.000552869	0.000511727	0.000532183	0.0104879	0.00117849
C1orf109	Cytosol	C1	0.00972661	0.0119484	0.974768	0.00355676	0.00317514	0.00211868	0.00188301	0.00254978	0.00391276	0.00237441	0.00302774	0.00263351	0.832416	0.0826582	0.0318322	0.0129532	0.0149083	0.00132736	0.00222939
C1orf122	Cytosol	Unclassified	0.0300602	0.0687863	0.891265	0.00988854	0.0103196	0.00724783	0.00548727	0.00700547	0.00981058	0.0076422	0.0101507	0.0411828	0.0200931	0.0325091	0.0277955	0.175116	0.635751	0.00363666	0.00625188
C1orf123	Cytosol	Unclassified	0.0453852	0.0583773	0.881359	0.0148786	0.0158055	0.0106722	0.00804281	0.0108647	0.0146474	0.0110432	0.0157081	0.0169786	0.032168	0.0209638	0.0570015	0.634668	0.136558	0.0052468	0.00963181
C1orf131	Nuclear	Unclassified	0.0201495	0.96817	0.00640019	0.00528002	0.00256587	0.00410316	0.00185153	0.0116289	0.0522356	0.180871	0.732897	0.00216736	0.00135267	0.00122596	0.00122339	0.00122291	0.00137527	0.00247084	0.00280917
C1orf159	Secretory	Unclassified	0.940875	0.00445024	0.00470929	0.049965	0.14743	0.376495	0.235734	0.181217	0.000914243	0.00136048	0.00117327	0.00100225	0.000926821	0.000935679	0.000951932	0.000926633	0.000968222	0.0296977	0.0202674
C1orf174	Nuclear	N4	0.010221	0.970117	0.0155715	0.00409064	0.00304682	0.00223386	0.00215163	0.00278871	0.00537741	0.0853284	0.00436261	0.875048	0.00280152	0.00371139	0.00211403	0.00246658	0.00447797	0.00197135	0.0021193
C1orf21	Secretory	Unclassified	0.968049	0.0178989	0.00743159	0.0066207	0.598646	0.0813273	0.140712	0.147363	0.012041	0.00194295	0.00242817	0.0014868	0.00210824	0.00126645	0.00127714	0.00131474	0.00146502	0.00514215	0.00147855
C1orf43	Secretory	Unclassified	0.980724	0.00405918	0.00337136	0.0118452	0.0184128	0.610462	0.303712	0.0481376	0.00126474	0.0010157	0.00104437	0.000734371	0.000682946	0.000671007	0.000684662	0.000656374	0.000676373	0.00891541	0.00292975
C1orf50	Cytosol	Unclassified	0.0151141	0.0211772	0.958624	0.005085	0.0051977	0.00357559	0.00276147	0.00357937	0.00461456	0.00368764	0.00491061	0.00796444	0.0205724	0.0278662	0.0455054	0.294268	0.570412	0.00188419	0.00320082
C1QBP	Mitochondria	M1	0.0575272	0.0952596	0.0300657	0.817148	0.00782032	0.0124582	0.0213959	0.0158528	0.0078626	0.0194269	0.0259887	0.0419814	0.00633999	0.00613231	0.00479148	0.0056131	0.00718881	0.782126	0.0350214
C20orf24	Secretory	Unclassified	0.974127	0.0119483	0.0062038	0.00772125	0.0438771	0.732592	0.133346	0.0643117	0.00396298	0.00465943	0.00157845	0.00174739	0.00149339	0.00127489	0.00105446	0.00108739	0.00129367	0.00515805	0.0025632
C20orf27	Cytosol	Unclassified	0.00436766	0.00502664	0.988742	0.00186379	0.0012989	0.000971329	0.000905224	0.00119221	0.00129132	0.0011924	0.00126374	0.00127918	0.0519136	0.0123128	0.597465	0.236334	0.0907163	0.000813301	0.00105048
C21orf59	Cytosol	Unclassified	0.00506425	0.00635098	0.986386	0.00219841	0.001467	0.00110514	0.00103941	0.0014527	0.00151898	0.00139501	0.00152989	0.0019071	0.079401	0.0389604	0.249009	0.194521	0.424495	0.000928152	0.00127026
C2CD2L	Secretory	Unclassified	0.886249	0.00638629	0.0054044	0.10196	0.0920795	0.168413	0.529456	0.0963007	0.00113171	0.00254996	0.00153223	0.00117239	0.00114516	0.00108294	0.0010486	0.00103369	0.001094	0.0954767	0.00648323
C2CD3	Secretory	Unclassified	0.853612	0.0614037	0.0708805	0.014104	0.489681	0.0852959	0.188327	0.0903079	0.0423309	0.00710041	0.00838189	0.00359059	0.0532782	0.00511933	0.00452854	0.00345326	0.00450126	0.00724131	0.00686264
C2CD5	Secretory	Unclassified	0.67498	0.246604	0.0285765	0.0498392	0.0395435	0.0376723	0.542024	0.0557397	0.0289667	0.0252463	0.00936408	0.183027	0.00730959	0.00583315	0.00438774	0.00454584	0.0065002	0.0387315	0.0111077
C2orf42	Nuclear	N1	0.0587909	0.933633	0.0045405	0.00303518	0.0416994	0.00456169	0.00657265	0.00595719	0.919447	0.00216902	0.0111368	0.000880153	0.00118994	0.000776192	0.000868931	0.000849898	0.000855547	0.00180794	0.00122723
C2orf49	Nuclear	N4	0.0136248	0.892554	0.0888534	0.00496822	0.00427232	0.00296739	0.00262752	0.00375756	0.00514208	0.00600999	0.00466635	0.876735	0.00563539	0.0283486	0.00311317	0.00382502	0.0479312	0.00209365	0.00287457
C2orf69	Cytosol	Unclassified	0.00961853	0.0128274	0.973657	0.00389709	0.00282943	0.00218559	0.00200307	0.00260043	0.00267787	0.0025098	0.00285778	0.00478199	0.431388	0.0704324	0.107125	0.0436958	0.321016	0.0016202	0.00227689
C2orf76	Cytosol	Unclassified	0.0167714	0.0213193	0.956215	0.00569462	0.00575137	0.00393475	0.00306186	0.00402337	0.00511661	0.00410036	0.00553295	0.00656938	0.0222798	0.0182902	0.0548441	0.712027	0.148774	0.00213332	0.00356129
C2orf88	Cytosol	Unclassified	0.00462289	0.0053912	0.987815	0.00217118	0.00127415	0.000991726	0.0009749	0.00138212	0.00126868	0.00130212	0.00140081	0.00141959	0.571205	0.130668	0.189691	0.0206316	0.0756187	0.00088696	0.00128422
C3	Nuclear	N4	0.135543	0.716582	0.119805	0.0280691	0.0192093	0.0122134	0.0385013	0.0656194	0.017534	0.032745	0.0143784	0.651925	0.0338163	0.0483184	0.00789563	0.00555792	0.0242172	0.0128637	0.0152054
C3orf33	Mitochondria	M2	0.0205966	0.00260279	0.0020643	0.974736	0.00419437	0.00208925	0.000913375	0.0133996	0.000525695	0.000776377	0.000949923	0.000350795	0.000358857	0.000401257	0.000453316	0.000421151	0.000429722	0.0076709	0.967065
C3orf38	Cytosol	Unclassified	0.00514202	0.00704306	0.985514	0.0023014	0.00143287	0.00115754	0.00105994	0.00149167	0.0014269	0.00179007	0.00224966	0.00157643	0.339712	0.533945	0.0452672	0.0212981	0.0452906	0.000943527	0.00135788
C3orf52	Cytosol	Unclassified	0.0172316	0.0135341	0.96055	0.00868452	0.00465226	0.0047341	0.00399795	0.00384733	0.00264243	0.0024791	0.00557606	0.0028365	0.5013	0.320449	0.0868596	0.0255876	0.0263529	0.00211462	0.0065699
C3orf58	Secretory	S1	0.978878	0.00230584	0.00334349	0.0154725	0.706392	0.0525595	0.0205973	0.199329	0.0003764	0.000706648	0.000562668	0.000660122	0.000567626	0.000690901	0.000712876	0.000668508	0.000703581	0.00760442	0.0078681
C3orf80	Secretory	S1	0.94478	0.0116979	0.0175178	0.0260043	0.607984	0.112306	0.120662	0.103827	0.00303537	0.00275474	0.00324839	0.00265941	0.00549374	0.00330536	0.00303472	0.00264943	0.0030345	0.00649791	0.0195064
C4BPA	Cytosol	Unclassified	0.0112744	0.0116216	0.970767	0.00633673	0.00292114	0.00228898	0.00290032	0.00316392	0.00263146	0.00234293	0.00448251	0.00216472	0.607338	0.210413	0.095326	0.0419742	0.0157159	0.00153141	0.00480532
C4orf19	Secretory	Unclassified	0.964689	0.0107174	0.00933393	0.0152597	0.516768	0.107609	0.0431841	0.297128	0.00303041	0.00260359	0.00276398	0.00231946	0.00197494	0.00175651	0.00170629	0.00177297	0.00212323	0.011735	0.00352462
C4orf3	Secretory	Unclassified	0.931865	0.0437899	0.0120066	0.0123388	0.0327961	0.681898	0.139756	0.0774148	0.0131302	0.0220966	0.00497953	0.00358355	0.00289081	0.00232268	0.00202843	0.00218439	0.00258032	0.0060583	0.00628048
C4orf46	Cytosol	Unclassified	0.0102011	0.0121317	0.973642	0.00402561	0.00323384	0.00232421	0.00201446	0.0026286	0.00309983	0.00267179	0.0030734	0.00328672	0.0892129	0.0170153	0.49512	0.210014	0.162279	0.00166134	0.00236427
C5	Cytosol	Unclassified	0.0638222	0.0712115	0.828623	0.0363437	0.0189616	0.0113074	0.015254	0.0182991	0.0163313	0.011985	0.0312561	0.011639	0.338051	0.115974	0.236584	0.0972032	0.0408098	0.00583288	0.0305108
C5AR2	Secretory	Unclassified	0.729806	0.136816	0.0463319	0.0870462	0.095127	0.022654	0.555774	0.0562508	0.0805742	0.0194976	0.0156896	0.021055	0.00953112	0.00810408	0.00752452	0.00901204	0.0121601	0.0705576	0.0164886
C5orf15	Secretory	Unclassified	0.970318	0.00889968	0.00718108	0.0136011	0.51495	0.129492	0.0450061	0.28087	0.00259708	0.00228915	0.00226162	0.00175183	0.00161582	0.00140253	0.00130805	0.00131064	0.00154404	0.0117742	0.00182695
C5orf22	Cytosol	Unclassified	0.0346497	0.122527	0.831198	0.0116251	0.0114302	0.00834291	0.00654431	0.00833224	0.0107926	0.00879817	0.0114422	0.0914946	0.018386	0.0231528	0.016306	0.0396135	0.73374	0.00430669	0.00731836
C5orf24	Nuclear	Unclassified	0.0444057	0.899796	0.0353874	0.0204111	0.0141988	0.00846561	0.0056398	0.0161015	0.0277907	0.353157	0.503487	0.0153604	0.00777423	0.0061499	0.00524302	0.00681205	0.00940822	0.0121307	0.0082804
C5orf30	Cytosol	Unclassified	0.0533091	0.0630843	0.86969	0.0139166	0.0170898	0.00912106	0.00918853	0.0179097	0.0160639	0.00998864	0.0109757	0.0260561	0.410481	0.310789	0.0351843	0.0139281	0.0993073	0.00443003	0.00948653
C5orf34	Cytosol	Unclassified	0.00363309	0.0039941	0.990628	0.00174497	0.000980164	0.000765326	0.000812192	0.0010754	0.000996482	0.000979321	0.00124823	0.000770067	0.620551	0.0929401	0.212248	0.0489588	0.0159298	0.000636164	0.0011088
C5orf42	Cytosol	C1	0.139928	0.0411481	0.802374	0.0165497	0.0669518	0.0230808	0.0266531	0.0232427	0.0171892	0.00677759	0.00878018	0.00840111	0.647851	0.0788227	0.0361228	0.0164145	0.0231629	0.00584427	0.0107054
C5orf51	Cytosol	C1	0.00652946	0.00801349	0.982718	0.0027394	0.0019485	0.00153762	0.00130084	0.0017425	0.00184076	0.00184442	0.00212323	0.00220508	0.754601	0.0386239	0.157685	0.021584	0.0102234	0.00111412	0.00162529
C6orf106	Cytosol	Unclassified	0.00271643	0.00305579	0.992985	0.00124279	0.000753653	0.000596919	0.000584198	0.000781655	0.000720162	0.0007509	0.000772508	0.000812218	0.284616	0.0655871	0.484636	0.0455876	0.112558	0.000548737	0.000694051
C6orf120	Secretory	Unclassified	0.978347	0.00297039	0.00399338	0.014689	0.157438	0.428373	0.315741	0.0767954	0.000732248	0.000940187	0.000752103	0.000545853	0.00110856	0.000762105	0.000730161	0.00071908	0.000673478	0.00924401	0.005445
C6orf203	Unclassified	Unclassified	0.248286	0.400341	0.243756	0.107617	0.0889641	0.057029	0.0402486	0.0620443	0.0868816	0.056509	0.0841268	0.172823	0.0511083	0.0378714	0.0304599	0.0458766	0.07844	0.0603683	0.0472486
C7orf25	Cytosol	C1	0.00266099	0.002972	0.993063	0.00130373	0.000707936	0.00058438	0.000564955	0.000803716	0.000713553	0.000784393	0.000828007	0.000646049	0.704496	0.0699082	0.191406	0.0180972	0.00915624	0.00054286	0.000760866
C7orf50	Nuclear	N1	0.0200554	0.959388	0.0154797	0.00507714	0.00794166	0.00413873	0.00334622	0.00462878	0.936478	0.00575698	0.0126451	0.00450779	0.00373108	0.00244746	0.00240715	0.00294144	0.00395252	0.00217334	0.0029038
C8orf33	Nuclear	N1	0.0605586	0.888195	0.0399851	0.011261	0.0313412	0.00880502	0.00695071	0.0134616	0.837203	0.0128702	0.0266343	0.0114879	0.0117145	0.00611164	0.00527191	0.00681528	0.0100718	0.00459675	0.0066643
C8orf37	Cytosol	Unclassified	0.0130938	0.0195878	0.962358	0.00496083	0.00406438	0.00316286	0.00259876	0.00326777	0.00375423	0.00345827	0.00431876	0.00805649	0.10444	0.118786	0.135075	0.0683089	0.535748	0.00201573	0.0029451
C8orf59	Nuclear	Unclassified	0.0499964	0.703002	0.233916	0.0130852	0.0142041	0.00807275	0.00830606	0.0194135	0.181724	0.0224152	0.0157696	0.483093	0.046221	0.0881326	0.0131554	0.00966368	0.0767436	0.00509443	0.00799079
C8orf82	Mitochondria	Unclassified	0.0513118	0.282122	0.0362106	0.630355	0.00845715	0.0106927	0.0154772	0.0166847	0.00851831	0.0316369	0.0300172	0.21195	0.00778856	0.00820981	0.00532117	0.00630234	0.00858873	0.603431	0.0269248
C9	Cytosol	Unclassified	0.080523	0.067763	0.81459	0.0371239	0.0262784	0.0137973	0.0199122	0.0205352	0.0175367	0.0122051	0.0226116	0.0154097	0.319319	0.207511	0.181779	0.0611873	0.0447944	0.00638825	0.0307357
C9orf72	Cytosol	Unclassified	0.00457026	0.0053156	0.988082	0.00203244	0.00130931	0.00103714	0.000952865	0.00127094	0.0013004	0.0012568	0.00142735	0.00133105	0.616785	0.0391624	0.287646	0.0356305	0.00885811	0.000812198	0.00122024
C9orf78	Nuclear	N4	0.0131887	0.883733	0.0981771	0.00490112	0.00417816	0.00291725	0.00272144	0.00337182	0.00424165	0.00488872	0.00463515	0.869968	0.00439292	0.00887654	0.00292741	0.0044551	0.0775251	0.00205729	0.00284383
C9orf85	Nuclear	N4	0.024905	0.913374	0.0528008	0.00892066	0.00851561	0.00569217	0.00452416	0.00617304	0.00951076	0.00820672	0.00943275	0.886223	0.00649824	0.0130143	0.00453401	0.00585829	0.022896	0.00358183	0.00533883
CA12	Cytosol	Unclassified	0.0177752	0.0124686	0.963492	0.00626442	0.00559323	0.00332722	0.00366856	0.00518621	0.00385722	0.00245593	0.00345329	0.00270213	0.633849	0.238293	0.0414875	0.0139162	0.0359456	0.00160662	0.00465779
CA2	Cytosol	Unclassified	0.00522857	0.00876999	0.983857	0.00214469	0.00161571	0.00118202	0.00104513	0.00138571	0.00158253	0.00145424	0.0015932	0.00414002	0.0158446	0.0317591	0.0348931	0.200149	0.701211	0.000931994	0.00121269
CA5B	Nuclear	N4	0.0626231	0.746549	0.154711	0.0361174	0.0192837	0.0138765	0.0102612	0.0192017	0.0176525	0.0341389	0.0272984	0.667459	0.0393652	0.0631528	0.0123251	0.0142567	0.0256112	0.019844	0.0162734
CA9	Secretory	Unclassified	0.977254	0.00396497	0.00241867	0.0163625	0.522912	0.088884	0.113172	0.252285	0.00108046	0.00118917	0.00119816	0.000497187	0.00046214	0.00047455	0.000510099	0.000485609	0.000486274	0.0157832	0.000579276
CAAP1	Nuclear	Unclassified	0.0914414	0.649213	0.230843	0.0285022	0.0193528	0.0145348	0.0143303	0.0432235	0.0411188	0.183175	0.0741809	0.350739	0.0614292	0.0719365	0.0188655	0.0171628	0.0614492	0.0102775	0.0182248
CAB39L	Cytosol	Unclassified	0.00614507	0.00716962	0.984054	0.00263146	0.00174073	0.0014489	0.00133626	0.00161918	0.00169657	0.00161592	0.00178063	0.00207649	0.117324	0.0686887	0.450234	0.0692233	0.278584	0.00115608	0.00147538
CABLES1	Secretory	Unclassified	0.953081	0.00738133	0.0060121	0.0335256	0.150011	0.0765874	0.639447	0.0870353	0.00193083	0.00216745	0.000957656	0.0023254	0.00179267	0.00117781	0.000998081	0.000950921	0.00109262	0.0322775	0.00124805
CACHD1	Secretory	Unclassified	0.972169	0.00871011	0.00607897	0.0130422	0.53132	0.0805348	0.143543	0.216771	0.00282507	0.00223811	0.00219599	0.00145095	0.00127854	0.00114814	0.00115018	0.00120328	0.00129883	0.0115311	0.00151113
CACNA2D1	Secretory	Unclassified	0.975454	0.0070236	0.00597743	0.0115453	0.464295	0.1314	0.0491765	0.330583	0.00190709	0.00181294	0.0018463	0.00145727	0.00127567	0.00116581	0.0011205	0.00111883	0.00129661	0.0103551	0.00119026
CACNA2D3	Secretory	Unclassified	0.923626	0.00849488	0.00751449	0.0603646	0.103195	0.0601014	0.676503	0.083827	0.00183955	0.00303159	0.00154152	0.00208222	0.00195448	0.00151007	0.00133807	0.00125122	0.00146066	0.0578705	0.00249407
CACNB3	Cytosol	C2	0.00391556	0.00505599	0.989148	0.00188016	0.0010799	0.00088349	0.000860517	0.00109165	0.00108593	0.00117634	0.00117693	0.00161678	0.116032	0.700311	0.0512134	0.00646198	0.11513	0.000821746	0.00105841
CACTIN	Nuclear	N4	0.00748967	0.97589	0.0140087	0.00261156	0.00225817	0.00160486	0.00141336	0.00221328	0.00233077	0.00810267	0.00320099	0.962256	0.0021024	0.00592724	0.00139749	0.00156355	0.00301805	0.00111325	0.00149831
CACUL1	Cytosol	Unclassified	0.0293173	0.209379	0.749817	0.0114861	0.00727513	0.00499598	0.00533432	0.0117118	0.00762695	0.0101527	0.00829964	0.1833	0.110348	0.497801	0.0222366	0.00963527	0.109796	0.00411705	0.00736901
CACYBP	Cytosol	Unclassified	0.00395313	0.00454154	0.989796	0.00170957	0.00116411	0.000876235	0.00082607	0.00108671	0.00114821	0.00108631	0.00114502	0.00116199	0.0478902	0.0139925	0.506452	0.317786	0.103675	0.000747826	0.000961741
CAD	Cytosol	C1	0.00505094	0.00645752	0.986261	0.0022304	0.00142933	0.00115408	0.00101426	0.00145328	0.00171043	0.00151875	0.00166992	0.00155842	0.830869	0.0166006	0.109945	0.0202806	0.0085652	0.000909509	0.00132089
CADM1	Secretory	Unclassified	0.944868	0.00754137	0.00987255	0.037718	0.539092	0.2026	0.062635	0.140541	0.0016652	0.0020218	0.00188638	0.001968	0.00203437	0.00197754	0.00184313	0.0018905	0.00212701	0.00763982	0.0300781
CADM4	Secretory	Unclassified	0.979139	0.00179336	0.0022025	0.0168649	0.379542	0.254046	0.158537	0.187014	0.000413695	0.00053453	0.000459995	0.000385136	0.000400659	0.000446067	0.000469572	0.000446363	0.000439841	0.01532	0.00154489
CALCOCO1	Cytosol	Unclassified	0.00324635	0.00369395	0.991634	0.00142553	0.000948667	0.00070996	0.000674718	0.000913002	0.000955746	0.000898265	0.000932889	0.000907052	0.0892714	0.0102841	0.695739	0.1393	0.0570397	0.000628693	0.000796832
CALCOCO2	Cytosol	Unclassified	0.00413616	0.00534286	0.988583	0.00193817	0.00114233	0.000920345	0.000885975	0.00118751	0.00102083	0.0012109	0.00115505	0.00195608	0.120223	0.597937	0.13854	0.0107912	0.121092	0.00086605	0.00107212
CALD1	Cytosol	Unclassified	0.0350147	0.0811336	0.87166	0.012192	0.0116132	0.00819942	0.00661346	0.00858862	0.0109715	0.00919894	0.0115637	0.0493995	0.0235831	0.0259052	0.0257211	0.112329	0.684121	0.00456773	0.00762426
CALML3	Cytosol	Unclassified	0.164213	0.0778936	0.706285	0.0516089	0.0378558	0.0284722	0.0421865	0.0556981	0.0302638	0.0148699	0.0191665	0.0135934	0.506248	0.116963	0.0322699	0.0167402	0.0340639	0.00949698	0.042112
CALR	Nuclear	N4	0.022462	0.935188	0.0333956	0.00895446	0.00682121	0.00470003	0.00491548	0.00602525	0.00622606	0.00994152	0.00824659	0.910774	0.00478358	0.0134556	0.00339044	0.00413615	0.00762983	0.00406001	0.00489445
CALR3	Nuclear	N4	0.0713148	0.796101	0.109413	0.0231712	0.0237692	0.015822	0.0145825	0.017141	0.0205556	0.0218549	0.0257347	0.727956	0.0185949	0.039707	0.0106296	0.0131668	0.0273143	0.0087459	0.0144253
CALU	Nuclear	N4	0.0172774	0.928269	0.0471952	0.00725801	0.00356808	0.00248284	0.00396259	0.00726391	0.0036104	0.0102354	0.00506204	0.909362	0.00530847	0.0308793	0.00259028	0.00236487	0.00605223	0.00339104	0.00386697
CAMK1	Cytosol	Unclassified	0.010337	0.0125924	0.973069	0.00400175	0.00337806	0.00232303	0.00198112	0.00265482	0.00315111	0.00274707	0.00317664	0.00351763	0.0390687	0.0250822	0.157977	0.656015	0.0949256	0.00161868	0.00238307
CAMK1D	Cytosol	C4	0.00887119	0.0110153	0.976725	0.00338864	0.00296377	0.00194623	0.00166277	0.00229842	0.00270713	0.00234439	0.00274977	0.00321401	0.0218104	0.0227767	0.0606233	0.801086	0.0704281	0.00135244	0.0020362
CAMK2A	Cytosol	C1	0.00488834	0.00636142	0.986546	0.00220419	0.00138296	0.0011503	0.000934987	0.00142009	0.00140308	0.00157034	0.00167932	0.00170869	0.886588	0.0233516	0.0571475	0.0128834	0.00657536	0.000916274	0.00128791
CAMK2B	Cytosol	C2	0.0138202	0.0334761	0.947946	0.00475753	0.00427596	0.00280167	0.0026015	0.00414112	0.00594366	0.00379918	0.00360526	0.020128	0.117051	0.713399	0.0240724	0.0071582	0.0862656	0.0018959	0.00286162
CAMK2D	Cytosol	C1	0.00436151	0.0054335	0.988287	0.00191788	0.0012537	0.00102002	0.000878113	0.00120969	0.00127253	0.00128786	0.00141508	0.00145803	0.855839	0.0296998	0.0822523	0.0129941	0.00750231	0.000801567	0.00111632
CAMK2G	Cytosol	C1	0.00301897	0.00357182	0.991961	0.00144816	0.000820809	0.000681128	0.000626548	0.000890486	0.00085629	0.000919719	0.00095776	0.000838051	0.811943	0.0304662	0.127047	0.0158858	0.0066196	0.000613699	0.000834465
CAMLG	Secretory	Unclassified	0.984043	0.00435504	0.00307247	0.0085296	0.0747381	0.644603	0.169186	0.0955159	0.00153413	0.00128344	0.000884932	0.000652535	0.000712244	0.00064586	0.000578575	0.000542059	0.000593729	0.00617452	0.00235507
CAMSAP1	Cytosol	Unclassified	0.00426392	0.00488988	0.98891	0.00193662	0.0011811	0.000923697	0.000905409	0.00125372	0.0011951	0.00114365	0.00125165	0.00129948	0.288358	0.0582417	0.466652	0.0520504	0.123608	0.000809125	0.00112749
CAMSAP2	Cytosol	C1	0.00279064	0.00316119	0.992706	0.00134186	0.000760624	0.000617168	0.000587273	0.000825572	0.000760123	0.000823678	0.00085362	0.000723765	0.71146	0.0367931	0.21562	0.0201456	0.00868734	0.000567109	0.000774753
CAMSAP3	Cytosol	Unclassified	0.0739494	0.0342446	0.858791	0.0330149	0.0231563	0.0129378	0.0191004	0.0187549	0.0071702	0.00671363	0.00753487	0.0128259	0.192706	0.52997	0.0561253	0.0183266	0.0616628	0.00740398	0.025611
CAND1	Cytosol	C2	0.00413144	0.00480011	0.989099	0.00196896	0.00114574	0.000953688	0.000887771	0.00114424	0.000962146	0.00125029	0.00119005	0.00139763	0.156659	0.741957	0.0445966	0.00524058	0.0406466	0.000879895	0.00108907
CANT1	Secretory	Unclassified	0.983535	0.00161428	0.00223447	0.0126158	0.603472	0.0862114	0.0588905	0.234961	0.000284096	0.000544316	0.000399548	0.000386324	0.000398429	0.000449057	0.000485157	0.000458794	0.000443035	0.0106943	0.0019215
CANX	Secretory	S2	0.983712	0.0022214	0.00280165	0.0112647	0.0348119	0.747503	0.125161	0.0762358	0.000574307	0.000598872	0.000510321	0.000537899	0.000522802	0.000578767	0.000578019	0.000555158	0.000566906	0.0062589	0.00500584
CAP1	Cytosol	Unclassified	0.00603625	0.00725225	0.98428	0.00243118	0.0019454	0.00130871	0.00118738	0.00159476	0.00176803	0.00162286	0.0017812	0.00208015	0.0543313	0.0162068	0.215725	0.606163	0.0918549	0.00100735	0.00142383
CAP2	Cytosol	Unclassified	0.00460945	0.00545786	0.988	0.00193317	0.00142788	0.00100781	0.000929736	0.00124402	0.00135812	0.00126983	0.00134989	0.00148002	0.0432108	0.0129061	0.275232	0.588946	0.0677043	0.000826034	0.00110714
CAPG	Cytosol	Unclassified	0.00292959	0.00329943	0.992407	0.00136441	0.000797022	0.000654703	0.000630661	0.000847206	0.000794426	0.0008202	0.000853099	0.000831708	0.250602	0.0506846	0.502684	0.0561052	0.13233	0.000600843	0.000763568
CAPN1	Cytosol	Unclassified	0.0042887	0.00491682	0.988951	0.00184334	0.00127957	0.000925049	0.000883501	0.00120058	0.00126061	0.00115646	0.00124228	0.00125747	0.0853858	0.0121339	0.525856	0.290376	0.0751994	0.000780834	0.0010625
CAPN15	Cytosol	C2	0.00312069	0.00345823	0.991857	0.00156437	0.000849216	0.000680031	0.000682419	0.000909028	0.000764955	0.000902745	0.000886234	0.0009043	0.248345	0.644776	0.041816	0.00581536	0.0511039	0.000661845	0.000902525
CAPN7	Cytosol	Unclassified	0.00442011	0.00529324	0.988429	0.00185716	0.00136796	0.000969119	0.000887062	0.00119597	0.00131993	0.00123331	0.00130319	0.00143682	0.030401	0.0134967	0.187336	0.66179	0.0954061	0.000807209	0.00104995
CAPNS1	Cytosol	Unclassified	0.00394989	0.00462622	0.989756	0.00166785	0.0012045	0.000862276	0.000786631	0.00109648	0.00116494	0.00113034	0.00115653	0.00117441	0.138652	0.0154373	0.696124	0.114843	0.0246997	0.000728707	0.000939144
CAPRIN1	Nuclear	N1	0.0243658	0.938777	0.0299087	0.00694813	0.00773642	0.00479651	0.0040129	0.00781997	0.895577	0.0151727	0.0132752	0.014753	0.00661488	0.00666922	0.00401706	0.00463525	0.00797228	0.00261684	0.00433129
CAPZA1	Cytosol	Unclassified	0.00397762	0.0039786	0.989975	0.00206895	0.00102963	0.000867453	0.000900082	0.00118045	0.000889391	0.000960881	0.00126521	0.000863116	0.635476	0.266877	0.0569117	0.0149068	0.015803	0.000687763	0.00138119
CAPZA2	Cytosol	C1	0.00301746	0.00334295	0.992111	0.00152811	0.000796011	0.000664049	0.00066316	0.000894243	0.000758486	0.000851948	0.00101514	0.000717376	0.674128	0.183856	0.0910666	0.0174353	0.0256257	0.000588742	0.000939363
CAPZB	Cytosol	C1	0.00472299	0.00451911	0.988371	0.00238663	0.00124596	0.000991998	0.00107175	0.00141328	0.00106109	0.00104595	0.00146053	0.000951539	0.657974	0.248867	0.0497734	0.01448	0.0172773	0.000738976	0.00164765
CARD10	Cytosol	C1	0.00264294	0.00284214	0.993136	0.00137938	0.000688267	0.000564232	0.000590948	0.000799494	0.000667701	0.000729205	0.000847677	0.00059756	0.750214	0.133187	0.0840143	0.0156605	0.0100598	0.000521696	0.000857681
CARD19	Mitochondria	M2	0.0345153	0.00267252	0.0036064	0.959206	0.0040847	0.00816215	0.0032892	0.0189793	0.000638285	0.000654141	0.000763351	0.000616742	0.000668701	0.000714816	0.000757696	0.000706735	0.000758452	0.00528844	0.953917
CARD6	Cytosol	Unclassified	0.00634717	0.00543581	0.984821	0.00339585	0.00177894	0.00129344	0.00155872	0.00171606	0.00128905	0.00128352	0.00163314	0.0012301	0.621752	0.247019	0.0854561	0.0199233	0.0106716	0.000967498	0.00242835
CARD8	Cytosol	Unclassified	0.00453021	0.00527525	0.98826	0.00193474	0.0013688	0.000974601	0.000923851	0.00126296	0.00137209	0.00123134	0.00133433	0.00133749	0.0569939	0.0100019	0.497426	0.33599	0.0878476	0.000818137	0.00111661
CARHSP1	Cytosol	Unclassified	0.0053365	0.00742367	0.985049	0.00219105	0.00165771	0.0012058	0.00106567	0.00140732	0.00161252	0.00148303	0.00161866	0.00270947	0.0254019	0.0187792	0.0866996	0.254155	0.600013	0.000947982	0.00124307
CARM1	Cytosol	Unclassified	0.0335464	0.0298157	0.925589	0.0110488	0.0102243	0.00583198	0.00661693	0.0108732	0.00668918	0.00527342	0.0052599	0.0125932	0.239621	0.556603	0.0336765	0.0098874	0.0858013	0.0033776	0.00767117
CARMIL1	Cytosol	C1	0.00326413	0.00369183	0.9915	0.0015436	0.000912321	0.00072005	0.000674708	0.000957051	0.000880729	0.000956594	0.000988398	0.000866113	0.761558	0.075463	0.132881	0.0157819	0.00581655	0.000644303	0.000899293
CARNMT1	Cytosol	Unclassified	0.0398044	0.0997538	0.84728	0.0131615	0.0133183	0.00960872	0.0074376	0.00943971	0.01242	0.0100998	0.0132981	0.063936	0.0167111	0.0253333	0.0158327	0.0446533	0.74475	0.00480666	0.00835485
CARS	Cytosol	Unclassified	0.00443622	0.00644713	0.987266	0.00185063	0.00136436	0.000990124	0.000894903	0.00118683	0.00130782	0.00124709	0.00134036	0.00255186	0.0206326	0.0374737	0.0899121	0.314352	0.524896	0.000804644	0.00104599
CARS2	Unclassified	Unclassified	0.0630109	0.323028	0.0387689	0.575192	0.00965791	0.0127792	0.0217876	0.0187863	0.0101507	0.0517633	0.0428961	0.218218	0.00834395	0.00849949	0.00597344	0.00672839	0.00922361	0.5369	0.0382923
CASC3	Nuclear	N1	0.0821861	0.879664	0.0299936	0.00815586	0.057559	0.00672384	0.005776	0.0121273	0.845082	0.00908215	0.018197	0.0073033	0.010368	0.00436961	0.00381262	0.00469506	0.00674832	0.00355643	0.00459943
CASC4	Secretory	Unclassified	0.977597	0.00319997	0.00358197	0.0156206	0.51703	0.163936	0.0506853	0.245947	0.000782143	0.000902272	0.000774727	0.00074083	0.000699922	0.000733108	0.000730679	0.000687764	0.000730494	0.0114132	0.0042074
CASD1	Secretory	Unclassified	0.983038	0.00338661	0.0034414	0.010134	0.425269	0.269139	0.0862964	0.202334	0.000903471	0.000880661	0.000867302	0.000735178	0.000675839	0.0006937	0.000693951	0.000663497	0.000714412	0.00898797	0.001146
CASK	Secretory	Unclassified	0.946045	0.00500822	0.00397826	0.0449687	0.286027	0.155316	0.331344	0.173358	0.00114831	0.00158903	0.00144076	0.000830124	0.000758762	0.000786199	0.00082477	0.00079256	0.00081597	0.0427956	0.00217308
CASKIN2	Cytosol	Unclassified	0.0052457	0.00441928	0.987939	0.00239629	0.00153301	0.00107494	0.00115587	0.00148188	0.00110679	0.00106422	0.00122748	0.0010208	0.564584	0.356012	0.0430097	0.00995345	0.0143799	0.00079237	0.00160392
CASP1	Cytosol	Unclassified	0.0026425	0.00293558	0.993125	0.00129647	0.000700207	0.000572808	0.000589866	0.000779618	0.000676509	0.000763611	0.000783745	0.000711714	0.453047	0.253913	0.17758	0.0227568	0.0858277	0.000552032	0.000744443
CASP10	Cytosol	C1	0.00499421	0.00633406	0.986433	0.00223911	0.00137517	0.00109602	0.00101492	0.00150809	0.00175971	0.00146548	0.00170992	0.00139895	0.81096	0.0219932	0.115196	0.0279245	0.0103592	0.000869083	0.00137003
CASP2	Cytosol	C2	0.0086499	0.0164018	0.971171	0.00377774	0.00254419	0.00188143	0.00179713	0.00242716	0.00193318	0.00211692	0.00221209	0.0101396	0.0760077	0.738825	0.0310381	0.00672267	0.118577	0.00150956	0.00226819
CASP3	Cytosol	Unclassified	0.00386914	0.00601064	0.988492	0.00162851	0.00116455	0.000877997	0.000795156	0.00103143	0.00113816	0.00110188	0.00117053	0.00260007	0.0119165	0.0324952	0.0471037	0.211949	0.685027	0.000732171	0.000896341
CASP4	Cytosol	Unclassified	0.00448797	0.00518786	0.988403	0.00192086	0.00134778	0.00097677	0.000915495	0.00124793	0.00134963	0.0012113	0.00132088	0.00130606	0.0664376	0.0108616	0.548959	0.270041	0.0921048	0.000815692	0.00110517
CASP6	Cytosol	Unclassified	0.00354311	0.00535239	0.989592	0.00151286	0.00106204	0.000787524	0.000731121	0.000962426	0.00104806	0.00101443	0.00105268	0.00223721	0.0219398	0.047284	0.110912	0.2275	0.581956	0.000672987	0.000839876
CASP7	Cytosol	Unclassified	0.00772442	0.012222	0.977043	0.00301071	0.00249535	0.00172606	0.00150977	0.00199324	0.00233319	0.0020832	0.00238696	0.00541865	0.0197266	0.031144	0.0305935	0.165352	0.730227	0.00124314	0.00176757
CASP8	Cytosol	Unclassified	0.00308348	0.00354926	0.992005	0.00136259	0.000888797	0.000682041	0.00065191	0.000860735	0.000884298	0.000863242	0.000881186	0.00092053	0.0627531	0.0136824	0.662786	0.130354	0.122429	0.000610628	0.000751963
CAST	Cytosol	Unclassified	0.0148338	0.0208531	0.959233	0.00508041	0.0051087	0.00344955	0.00271442	0.00356114	0.0045307	0.00368284	0.00479895	0.0078406	0.0297617	0.0257121	0.035531	0.257446	0.610782	0.00190016	0.00318025
CASZ1	Nuclear	Unclassified	0.00628286	0.971414	0.00380967	0.0184937	0.00108011	0.000879577	0.00156494	0.00275824	0.00408922	0.334214	0.631386	0.00172405	0.000694749	0.000778097	0.000786304	0.000742397	0.000808124	0.0141176	0.00437605
CATSPERG	Secretory	Unclassified	0.874511	0.0953569	0.0179864	0.0121455	0.526552	0.0631075	0.175087	0.109765	0.0697153	0.00825172	0.0138716	0.0035183	0.00650389	0.00275577	0.00266307	0.00275911	0.0033046	0.00774097	0.00440458
CAV1	Secretory	S2	0.985457	0.00335921	0.00329124	0.00789229	0.0426511	0.740755	0.139492	0.062559	0.00110683	0.000833958	0.000714893	0.000703527	0.000642807	0.000683843	0.000649067	0.000633095	0.000682427	0.00466118	0.00323111
CAV2	Secretory	Unclassified	0.981964	0.00270619	0.00285127	0.0124786	0.424992	0.157788	0.265467	0.133717	0.000728447	0.000768784	0.000726158	0.000482801	0.000699484	0.000526753	0.000549868	0.000541027	0.000534133	0.0114546	0.00102398
CAVIN1	Secretory	Unclassified	0.971156	0.00449479	0.00288121	0.0214683	0.272822	0.164072	0.455963	0.0782987	0.00143904	0.00127356	0.00118697	0.000595228	0.000605291	0.000541139	0.000572913	0.000578371	0.000583496	0.0206858	0.000782499
CAVIN2	Secretory	Unclassified	0.950753	0.0204745	0.00425862	0.0245134	0.288128	0.0722298	0.531342	0.0590538	0.00981544	0.00451115	0.00499361	0.00115431	0.0009531	0.000788484	0.00082836	0.000830683	0.000857991	0.0231015	0.00141196
CBARP	Secretory	Unclassified	0.987035	0.00236704	0.00315573	0.00744219	0.507554	0.0956897	0.0369289	0.346863	0.000479011	0.000655442	0.000565639	0.000666942	0.000623062	0.000664724	0.000626931	0.000592031	0.000648979	0.00641535	0.00102685
CBFA2T2	Nuclear	N4	0.00837994	0.972799	0.0158938	0.00292756	0.00274729	0.0018745	0.00158223	0.00217592	0.00245294	0.00298262	0.00294806	0.964415	0.00224928	0.00656867	0.00148272	0.00186148	0.00373162	0.00127716	0.00165039
CBL	Cytosol	Unclassified	0.00350585	0.00398393	0.990989	0.00152157	0.00100761	0.000797067	0.000738324	0.000962845	0.000996179	0.000963125	0.00100433	0.00102029	0.191688	0.0184522	0.660378	0.0852927	0.0351782	0.000679529	0.00084204
CBLB	Cytosol	Unclassified	0.00384557	0.00438216	0.990079	0.00169282	0.00111814	0.000819255	0.00079969	0.00110849	0.00113283	0.00104321	0.00111661	0.00108952	0.127834	0.0132241	0.613368	0.155358	0.0802953	0.000712499	0.000980324
CBLL1	Nuclear	N2	0.00442216	0.987623	0.00533225	0.00262219	0.00131177	0.0010479	0.000704196	0.00135829	0.00478421	0.954154	0.0213731	0.00731252	0.00102753	0.000965261	0.0010452	0.00104207	0.00125218	0.00144337	0.00117883
CBR1	Cytosol	Unclassified	0.0046704	0.00680449	0.986583	0.00194211	0.00142419	0.00104846	0.000952689	0.00124505	0.00139196	0.00129607	0.00139641	0.00272005	0.0154732	0.0246571	0.0541495	0.228801	0.663502	0.000850808	0.00109131
CBR3	Cytosol	Unclassified	0.00586496	0.0078561	0.983894	0.00238466	0.00185526	0.00127732	0.00116379	0.00156859	0.00180233	0.00161162	0.00174939	0.00269275	0.0303976	0.0197589	0.10233	0.292415	0.538993	0.00100242	0.00138224
CBR4	Mitochondria	M1	0.0695593	0.208261	0.0220688	0.700111	0.00597939	0.0132606	0.0293098	0.0210095	0.00566373	0.0583534	0.0823757	0.0618679	0.00463708	0.0048019	0.00386008	0.00404817	0.00472155	0.642812	0.0572988
CBWD2	Cytosol	C1	0.00486745	0.00651935	0.986481	0.00213201	0.00135891	0.00109051	0.000954403	0.00146363	0.00182783	0.00151604	0.00176984	0.00140564	0.853414	0.034208	0.0629797	0.0209	0.0149797	0.000853908	0.0012781
CBX3	Nuclear	N4	0.0291352	0.920164	0.0413345	0.00936667	0.0101589	0.00684504	0.00495908	0.00717212	0.00968137	0.0201659	0.0115921	0.878724	0.00792475	0.00949921	0.00476593	0.00647655	0.0126681	0.00395011	0.00541656
CBX4	Nuclear	N1	0.00555765	0.988969	0.00406395	0.00140951	0.00188778	0.000954212	0.00168963	0.00102603	0.974619	0.00412338	0.00868174	0.00154453	0.000727232	0.000752198	0.000852816	0.000831946	0.000899755	0.000679364	0.000730151
CBX5	Nuclear	Unclassified	0.0383222	0.901078	0.0386889	0.0219106	0.0124269	0.00967905	0.00573735	0.0104788	0.018954	0.802552	0.0382993	0.0412728	0.00819513	0.00692713	0.00575558	0.00742891	0.0103821	0.0123586	0.00955202
CBX6	Nuclear	N1	0.00707766	0.989227	0.00250434	0.00119069	0.00352812	0.000977183	0.00122491	0.00134744	0.981245	0.00125306	0.0062375	0.000491369	0.000461664	0.000479961	0.000541476	0.000533688	0.000487555	0.00067984	0.00051085
CBX8	Nuclear	N3	0.0153317	0.973375	0.00732938	0.00396376	0.00771571	0.00271092	0.00229329	0.00261174	0.0919444	0.10168	0.776523	0.00322834	0.00154385	0.00141761	0.00138888	0.00138858	0.00159047	0.00253966	0.00142411
CC2D1A	Cytosol	Unclassified	0.00298233	0.00332678	0.992324	0.00136673	0.000834588	0.000651355	0.000637156	0.000859233	0.000829683	0.000824319	0.000859642	0.000813139	0.21474	0.0214097	0.607942	0.0626851	0.0855476	0.000595481	0.000771252
CC2D1B	Cytosol	Unclassified	0.00378076	0.00542551	0.989154	0.00164011	0.00109102	0.000867438	0.000800342	0.00102197	0.00105491	0.00108399	0.00114478	0.00214183	0.0213234	0.0605791	0.0863092	0.152621	0.668321	0.000741851	0.000898258
CCAR1	Nuclear	N4	0.0236501	0.928714	0.0399498	0.0076864	0.00757536	0.00526437	0.00423062	0.0065797	0.00810913	0.0253771	0.0102486	0.884979	0.00672917	0.0129842	0.00412099	0.00473913	0.0113762	0.00321494	0.00447146
CCAR2	Nuclear	N4	0.0175306	0.962453	0.0154703	0.00454609	0.00465815	0.00292344	0.00380497	0.00614407	0.266278	0.0761829	0.00768012	0.612312	0.00358874	0.00283847	0.00222664	0.00245524	0.00436124	0.00220696	0.00233913
CCDC106	Nuclear	N1	0.00952818	0.987378	0.00206505	0.00102898	0.00607746	0.00108298	0.00138514	0.000982592	0.981454	0.00144881	0.00399002	0.000485061	0.000345618	0.000389726	0.000471684	0.000452319	0.000405701	0.000599911	0.00042907
CCDC107	Secretory	Unclassified	0.672861	0.0843846	0.0448822	0.197872	0.0787663	0.150047	0.307281	0.136766	0.0119934	0.0212844	0.0421945	0.00891233	0.0199782	0.00821522	0.00528593	0.00432007	0.00708278	0.0917632	0.106109
CCDC112	Secretory	Unclassified	0.881878	0.0570927	0.038829	0.0222003	0.29345	0.12948	0.332833	0.126115	0.0203686	0.0158936	0.0169506	0.00387995	0.0202329	0.00566292	0.00420485	0.00352127	0.00520708	0.0111643	0.011036
CCDC115	Secretory	Unclassified	0.971106	0.0048454	0.00469239	0.0193566	0.119429	0.305573	0.475936	0.0701676	0.0012198	0.00159028	0.00131795	0.000717377	0.00159501	0.000825757	0.000783058	0.000739389	0.00074917	0.0158227	0.00353399
CCDC12	Nuclear	N4	0.0397148	0.872249	0.076087	0.0119488	0.0138098	0.00929631	0.00697341	0.00963527	0.0131636	0.0196576	0.0169392	0.822489	0.0125459	0.0214937	0.00666028	0.00866673	0.0267203	0.00453527	0.00741351
CCDC120	Unclassified	Unclassified	0.226457	0.126887	0.613393	0.033263	0.0771822	0.0367044	0.0518194	0.0607506	0.0373074	0.0201246	0.0161479	0.0533075	0.361856	0.147292	0.0284578	0.0145695	0.0612185	0.012897	0.020366
CCDC127	Mitochondria	M2	0.0104281	0.00250155	0.00312696	0.983943	0.00198373	0.00142828	0.000737958	0.00627809	0.000488083	0.000680467	0.00074089	0.000592112	0.000625664	0.000639847	0.000636416	0.000563509	0.000661524	0.0054477	0.978496
CCDC130	Nuclear	Unclassified	0.0196093	0.965524	0.00523684	0.00962941	0.00224229	0.00271001	0.00993432	0.00472264	0.0424799	0.79465	0.106734	0.0216609	0.00109213	0.00109775	0.00102873	0.000933323	0.0010849	0.0065475	0.00308191
CCDC134	Secretory	Unclassified	0.602628	0.0211531	0.00959399	0.366625	0.021328	0.0371711	0.494343	0.0497857	0.00228823	0.00838801	0.00430571	0.00617114	0.00205413	0.00199692	0.00182647	0.00174853	0.00196793	0.346787	0.0198382
CCDC137	Nuclear	N3	0.0189666	0.966968	0.00869269	0.00537287	0.00814165	0.00386292	0.00349508	0.00346698	0.0657338	0.0639663	0.834042	0.00322541	0.00186891	0.00166325	0.00158213	0.00163151	0.00194689	0.00336423	0.00200864
CCDC138	Secretory	S1	0.972746	0.0134594	0.00464734	0.00914734	0.611663	0.0884459	0.16059	0.112047	0.00818608	0.00182461	0.00237771	0.00107097	0.00107456	0.000851649	0.000877147	0.00089463	0.000949354	0.0079509	0.00119645
CCDC14	Secretory	Unclassified	0.874643	0.104861	0.00881675	0.0116796	0.503609	0.0504266	0.268644	0.0519629	0.0864876	0.00701434	0.00826466	0.00309454	0.00215952	0.00155273	0.0016022	0.0016715	0.00183079	0.00933762	0.00234195
CCDC152	Nuclear	N4	0.0079067	0.949682	0.0397042	0.00270741	0.00234323	0.00166139	0.00150151	0.00240057	0.00377195	0.00377576	0.00272756	0.939406	0.00357656	0.0275237	0.00190504	0.00164619	0.00505268	0.0011558	0.00155161
CCDC167	Secretory	Unclassified	0.928807	0.00394053	0.00397609	0.0632769	0.166601	0.252308	0.374233	0.135664	0.000743334	0.00137737	0.00104272	0.000777111	0.000761749	0.000788688	0.000821474	0.000797825	0.000806358	0.0584553	0.00482151
CCDC174	Nuclear	N4	0.0056913	0.981115	0.0110926	0.00210097	0.00173796	0.00127962	0.00122225	0.00145147	0.00139791	0.00251723	0.00181196	0.975388	0.00158961	0.00374177	0.00105239	0.00125403	0.00345484	0.000974245	0.00112672
CCDC175	Mitochondria	M2	0.00949185	0.00231693	0.00210044	0.986091	0.00155362	0.000875193	0.000596099	0.00646694	0.000489324	0.000649358	0.000830835	0.000347418	0.000353994	0.000416833	0.000461513	0.000421565	0.00044653	0.00495484	0.981136
CCDC182	Nuclear	N1	0.0258219	0.947486	0.0203255	0.0063665	0.00926215	0.00603869	0.00485528	0.0056658	0.784521	0.0334249	0.0131317	0.116408	0.0040513	0.0034139	0.00327185	0.00402591	0.00556253	0.00273828	0.00362822
CCDC186	Cytosol	C5	0.00799588	0.0188579	0.969816	0.00332972	0.00231091	0.00186093	0.00169128	0.00213277	0.00225711	0.00218297	0.00238606	0.0120318	0.0339735	0.0451378	0.0501059	0.0690961	0.771503	0.0014504	0.00187932
CCDC22	Cytosol	Unclassified	0.00361251	0.00422091	0.990405	0.00176139	0.000981606	0.000834532	0.000777809	0.00101856	0.000899931	0.00111541	0.00111652	0.00108905	0.411187	0.453646	0.0753665	0.00782	0.0423864	0.00077751	0.000983883
CCDC25	Cytosol	Unclassified	0.00445644	0.00658224	0.987123	0.00183862	0.00136709	0.00100321	0.000907836	0.00117831	0.00132019	0.00125334	0.00134487	0.00266384	0.0154372	0.0206548	0.0470342	0.18581	0.718187	0.000810977	0.00102764
CCDC43	Cytosol	Unclassified	0.0086898	0.0108203	0.977238	0.00325174	0.00284824	0.0019888	0.00167939	0.00217336	0.00259046	0.00223913	0.00267707	0.00331364	0.0231388	0.0179774	0.0580389	0.705418	0.172665	0.00131545	0.00193629
CCDC47	Secretory	S2	0.977327	0.00607915	0.00552786	0.0110658	0.0380066	0.742253	0.129662	0.0674064	0.0019505	0.00167121	0.00115474	0.0013027	0.00112831	0.00112405	0.00103771	0.00104894	0.00118885	0.00541874	0.00564705
CCDC50	Cytosol	Unclassified	0.0113353	0.0142789	0.969773	0.00461248	0.00357173	0.00248756	0.002213	0.003063	0.00352432	0.00306922	0.00346761	0.0042177	0.0471202	0.0424588	0.158173	0.441117	0.280905	0.00189944	0.00271304
CCDC51	Mitochondria	M2	0.0556939	0.00140984	0.00196156	0.940935	0.0102705	0.0109252	0.0103947	0.0241034	0.00032338	0.000404138	0.000375448	0.000306873	0.000338489	0.000372779	0.000425899	0.000431505	0.000392885	0.0268247	0.91411
CCDC58	Nuclear	N4	0.016381	0.939683	0.0288826	0.0150531	0.00424054	0.00329565	0.00305445	0.00579039	0.00440257	0.0271124	0.0103522	0.897816	0.00625564	0.0105185	0.002832	0.00334639	0.00593004	0.00938011	0.00567295
CCDC59	Nuclear	N3	0.028286	0.954979	0.0102213	0.00651351	0.0106067	0.00523159	0.00445371	0.00799408	0.0658078	0.045478	0.840518	0.00317567	0.00226786	0.00199757	0.00180347	0.00190502	0.00224738	0.00377531	0.0027382
CCDC6	Cytosol	Unclassified	0.00475255	0.00686678	0.986425	0.00195599	0.00146574	0.00106844	0.00096226	0.00125611	0.00141787	0.00132975	0.00143274	0.00268642	0.0232698	0.0194384	0.0531139	0.152369	0.738234	0.000860736	0.00109526
CCDC61	Secretory	S1	0.9752	0.0134857	0.00579361	0.00552095	0.607595	0.0785541	0.120304	0.168747	0.00852337	0.00168016	0.00204018	0.00124195	0.00160794	0.000995717	0.000997931	0.00103871	0.00115332	0.00442954	0.0010914
CCDC66	Cytosol	C2	0.00267646	0.0033978	0.992532	0.00139372	0.000700927	0.000568958	0.000598245	0.000808327	0.000662207	0.000810594	0.000778186	0.00114681	0.145919	0.669704	0.0517704	0.00668069	0.118458	0.000603191	0.00079053
CCDC71	Nuclear	Unclassified	0.0184974	0.953955	0.0165165	0.0110308	0.00519589	0.00363144	0.00273022	0.00693987	0.0160521	0.222754	0.7079	0.00724956	0.00311847	0.00306263	0.0026892	0.00338038	0.00426579	0.00566533	0.00536548
CCDC77	Secretory	S1	0.826424	0.156986	0.00803809	0.00855175	0.653034	0.0344204	0.101309	0.0376612	0.143646	0.00314866	0.00822631	0.00196538	0.00173578	0.0014597	0.00153847	0.0015737	0.00173044	0.00664345	0.00190829
CCDC82	Nuclear	N4	0.0145571	0.957894	0.0228812	0.0046674	0.00499818	0.0034644	0.0026802	0.0034143	0.00443314	0.00507648	0.00521646	0.943168	0.00342472	0.00751153	0.0024808	0.00317461	0.0062895	0.00187012	0.00279728
CCDC84	Nuclear	N1	0.0180854	0.973476	0.00595726	0.00248172	0.0099468	0.00305321	0.00280351	0.00228192	0.959121	0.00330426	0.00916472	0.00188596	0.00124108	0.00100068	0.00107535	0.00120064	0.00143951	0.00116418	0.00131754
CCDC85B	Unclassified	Unclassified	0.394937	0.159951	0.105518	0.339594	0.0434455	0.0832648	0.150582	0.117645	0.0143873	0.0389527	0.0882585	0.0183521	0.0332473	0.0310643	0.0138376	0.0108017	0.0165676	0.0996328	0.239961
CCDC85C	Cytosol	Unclassified	0.00357992	0.0041954	0.990637	0.00158771	0.00102911	0.000806459	0.000744023	0.00100033	0.00100219	0.00102474	0.00104841	0.00112005	0.074709	0.0193136	0.645922	0.188777	0.0619153	0.000708927	0.000878786
CCDC86	Nuclear	Unclassified	0.00586067	0.986223	0.00606115	0.00185504	0.00279558	0.000904762	0.000795705	0.00136462	0.132976	0.125478	0.724138	0.00363143	0.00121259	0.00116757	0.00120117	0.00118041	0.00129941	0.00114047	0.000714568
CCDC88A	Cytosol	C1	0.00284098	0.00312335	0.992688	0.00134782	0.000781771	0.000614817	0.00060713	0.000837262	0.000775374	0.000800639	0.000848489	0.000698847	0.64102	0.0509069	0.265066	0.0278997	0.00779544	0.000554409	0.000793411
CCDC88C	Cytosol	Unclassified	0.0120381	0.00716667	0.974618	0.00617767	0.00336754	0.00239213	0.00299796	0.00328051	0.00156	0.00172147	0.00218092	0.00170429	0.30613	0.58436	0.0530958	0.015172	0.0158598	0.00151603	0.00466164
CCDC9	Cytosol	Unclassified	0.0754191	0.15913	0.746346	0.0191045	0.0286227	0.0151281	0.013599	0.0180692	0.108425	0.0121989	0.0222227	0.016284	0.575705	0.0472533	0.0372319	0.0251206	0.0610353	0.0056728	0.0134317
CCDC90B	Mitochondria	M2	0.0179026	0.00390549	0.00354088	0.974651	0.00421636	0.00352647	0.00173389	0.00842588	0.000837712	0.00115024	0.00119309	0.00072444	0.000715234	0.000707133	0.000708061	0.000653119	0.000757334	0.0103327	0.964318
CCDC92	Cytosol	Unclassified	0.0180597	0.0396067	0.935268	0.00706562	0.00485918	0.00347034	0.00343097	0.00629922	0.00654794	0.00552913	0.00613433	0.0213953	0.197755	0.535392	0.0238853	0.0122555	0.16598	0.00245134	0.00461427
CCDC93	Cytosol	Unclassified	0.00305193	0.0034616	0.991964	0.00152282	0.000819295	0.000677479	0.000669355	0.000885802	0.000750527	0.000921847	0.00087901	0.00091022	0.306614	0.589904	0.0448742	0.00608058	0.0444913	0.00066385	0.00085897
CCDC94	Nuclear	N4	0.00510381	0.978854	0.0142559	0.00178587	0.00156823	0.00114259	0.00101803	0.00137496	0.00122278	0.00208117	0.00167614	0.973874	0.0017782	0.00797901	0.0010404	0.00113807	0.00232026	0.000787822	0.00099805
CCDC97	Nuclear	N1	0.0467113	0.820252	0.120266	0.0127699	0.0144862	0.00935757	0.00752247	0.015345	0.645957	0.0220032	0.0189696	0.133322	0.032603	0.0366592	0.00957531	0.0103205	0.0311083	0.00488911	0.00788082
CCDC9B	Nuclear	N1	0.184324	0.758678	0.046089	0.0109089	0.0917839	0.0207478	0.0253723	0.0464197	0.713803	0.00921718	0.0312196	0.00443829	0.0278851	0.00451476	0.00425177	0.00400983	0.00542753	0.0047685	0.00614043
CCHCR1	Unclassified	Unclassified	0.233674	0.0861167	0.557735	0.122474	0.0574192	0.0461489	0.0571135	0.0729922	0.0147689	0.0158309	0.0300434	0.0254735	0.278021	0.174623	0.0345786	0.017488	0.0530244	0.0251212	0.097353
CCL2	Cytosol	C2	0.00847828	0.00950747	0.978578	0.00343648	0.00253021	0.00180708	0.00173707	0.00240391	0.00186387	0.00203799	0.001977	0.00362861	0.107796	0.772669	0.0292965	0.00599142	0.0628245	0.00137533	0.00206116
CCM2	Secretory	Unclassified	0.569563	0.203479	0.213908	0.0130504	0.396627	0.0303263	0.0751812	0.0674291	0.179997	0.00760195	0.00895704	0.00692236	0.177706	0.0105002	0.00775866	0.00714499	0.0107976	0.00618534	0.00686504
CCNA2	Nuclear	N4	0.0109654	0.734815	0.250197	0.00402233	0.00312146	0.00233829	0.00233284	0.00317281	0.00291596	0.00425812	0.00346894	0.724172	0.0113515	0.0529383	0.00536261	0.00765488	0.17289	0.00169142	0.0023309
CCNB2	Cytosol	C2	0.00326059	0.00367171	0.9914	0.00166774	0.000877225	0.000694953	0.000713888	0.000974525	0.000709813	0.000900337	0.000890189	0.00117137	0.164696	0.73244	0.0422475	0.00544848	0.0465673	0.000681888	0.000985854
CCNC	Nuclear	N1	0.0501999	0.942039	0.00465965	0.00310102	0.0312816	0.00420171	0.00823191	0.00648461	0.913267	0.0135808	0.0112409	0.00395093	0.00130606	0.000784224	0.000841991	0.000814779	0.000912599	0.00185473	0.00124629
CCND1	Cytosol	Unclassified	0.00758815	0.0100778	0.978982	0.00335189	0.00209606	0.00169944	0.00164308	0.00214957	0.00214023	0.00203578	0.00224866	0.00365313	0.0637092	0.179662	0.0699704	0.0385951	0.627046	0.00139866	0.00195323
CCNDBP1	Cytosol	C1	0.00462903	0.00539002	0.987976	0.0020052	0.00133567	0.00104108	0.000947633	0.00130465	0.00133049	0.00128465	0.00140611	0.00136877	0.640742	0.0200032	0.284472	0.0317774	0.0109811	0.000822274	0.00118293
CCNE1	Nuclear	N4	0.0134755	0.952572	0.0289985	0.00495402	0.00443955	0.00313503	0.00266596	0.00323497	0.00404972	0.00482383	0.00492822	0.93877	0.00373098	0.0119553	0.00258997	0.00306121	0.00766109	0.00210076	0.00285326
CCNE2	Nuclear	N4	0.00584767	0.967692	0.0243454	0.00211514	0.00150948	0.00105517	0.00111997	0.00216305	0.00190542	0.00416876	0.00194651	0.959671	0.00268539	0.0164851	0.00123526	0.00110331	0.00283633	0.000922245	0.00119289
CCNH	Nuclear	N4	0.00768215	0.958913	0.0305641	0.00284032	0.00234995	0.00166373	0.00148994	0.00217854	0.00274206	0.00327198	0.00264212	0.950257	0.00308844	0.019796	0.00173267	0.00175259	0.00419434	0.00126144	0.00157888
CCNK	Nuclear	N4	0.00637469	0.980381	0.0111584	0.00208585	0.00175636	0.00127315	0.0011704	0.00217478	0.00466852	0.017505	0.0025589	0.955649	0.00199454	0.00327306	0.00128397	0.00131522	0.00329157	0.00090212	0.00118373
CCNL1	Nuclear	N4	0.0736132	0.802345	0.102708	0.0213334	0.0265888	0.0179682	0.0125579	0.0164984	0.0256728	0.0750194	0.0287391	0.672914	0.0179335	0.0192717	0.0115251	0.0157855	0.0381922	0.00809399	0.0132394
CCNL2	Nuclear	N4	0.013604	0.960749	0.0211308	0.00451608	0.00441045	0.00295283	0.00263818	0.00360254	0.00501417	0.0100067	0.00514628	0.940582	0.00387292	0.0061802	0.00257041	0.00324111	0.00526622	0.00193418	0.0025819
CCNQ	Nuclear	Unclassified	0.107993	0.692034	0.163054	0.03692	0.0356131	0.0249415	0.016965	0.0304731	0.0470764	0.363767	0.0965286	0.184662	0.0393631	0.0349149	0.0186167	0.0271299	0.0430289	0.0141654	0.0227546
CCNT1	Nuclear	N4	0.00760111	0.979561	0.0102144	0.00262313	0.00223516	0.0016814	0.00168821	0.00199633	0.0070996	0.00657233	0.00291597	0.962973	0.00154451	0.00252055	0.00141117	0.00178105	0.00295709	0.00113848	0.00148465
CCNT2	Nuclear	N4	0.00579459	0.97452	0.017818	0.00186759	0.00165635	0.00120621	0.00104799	0.00188405	0.00341098	0.00467555	0.00194586	0.964487	0.00252315	0.00910693	0.00129368	0.00131852	0.00357573	0.000816864	0.00105072
CCNY	Secretory	Unclassified	0.985395	0.00330891	0.0026829	0.00861289	0.537418	0.0969876	0.123202	0.227787	0.00102803	0.00089678	0.000828166	0.000555936	0.000578168	0.000503923	0.000535575	0.00052787	0.000537363	0.0080784	0.000534497
CCNYL1	Secretory	Unclassified	0.979221	0.00684674	0.00381106	0.010121	0.544163	0.103799	0.0788083	0.252451	0.00230316	0.00171024	0.00192425	0.000909087	0.000805989	0.000732312	0.000735369	0.000735885	0.000801501	0.00932761	0.000793439
CCP110	Unclassified	Unclassified	0.227985	0.0553305	0.67487	0.0418148	0.0782886	0.0392224	0.0522057	0.0582678	0.0182092	0.0108323	0.0150691	0.0112198	0.478429	0.113074	0.0339291	0.015193	0.0342457	0.0102984	0.0315164
CCPG1	Secretory	Unclassified	0.976461	0.00509681	0.0052177	0.0132249	0.135529	0.614444	0.104331	0.122156	0.00150039	0.00135554	0.0010486	0.00119229	0.00107863	0.00106652	0.000985435	0.000978592	0.00110852	0.00644543	0.00677952
CCS	Cytosol	Unclassified	0.00482739	0.00688063	0.986302	0.0019904	0.0014612	0.00111481	0.000989954	0.00126142	0.00141178	0.00133987	0.00146713	0.00266184	0.0157371	0.0212862	0.0530583	0.235086	0.661134	0.000883163	0.00110724
CCSAP	Unclassified	Unclassified	0.231819	0.432222	0.215154	0.120805	0.0881493	0.0487787	0.0337997	0.061091	0.0763594	0.0918095	0.192334	0.0717198	0.0451147	0.0332055	0.0281468	0.0417983	0.0668888	0.0493829	0.0714219
CCSER2	Cytosol	C2	0.0136193	0.0273178	0.953362	0.00570132	0.00339681	0.00245945	0.00269362	0.00506937	0.00270488	0.00355727	0.00311198	0.0179437	0.149243	0.692836	0.0258909	0.00668838	0.0787031	0.00190327	0.00379805
CCT2	Cytosol	C1	0.0573966	0.073052	0.853906	0.0156456	0.0210061	0.0135255	0.00958938	0.0132756	0.0221583	0.012342	0.0175456	0.021006	0.656054	0.0678331	0.0463716	0.0237091	0.059938	0.00562704	0.0100186
CCT3	Cytosol	C1	0.0429909	0.0543967	0.891189	0.0114232	0.0157625	0.00985996	0.00731087	0.0100576	0.0178818	0.0088391	0.012219	0.0154568	0.696665	0.0772773	0.0430028	0.0190234	0.055221	0.00416551	0.00725772
CCT4	Cytosol	C1	0.0353946	0.0439388	0.911029	0.00963737	0.0126606	0.00809917	0.00606008	0.00857474	0.0137033	0.00740882	0.0099433	0.0128834	0.699495	0.093293	0.0472041	0.017913	0.0531242	0.00353507	0.0061023
CCT5	Cytosol	C1	0.051246	0.0651189	0.868826	0.0148091	0.0181321	0.0123024	0.00863845	0.012173	0.017664	0.0115984	0.0165829	0.0192735	0.660173	0.0761766	0.0528941	0.0237431	0.0558397	0.00531455	0.00949452
CCT6A	Cytosol	Unclassified	0.0774994	0.0977635	0.803231	0.0215063	0.0283265	0.018618	0.0128225	0.0177323	0.0275231	0.0169593	0.0250399	0.0282412	0.597759	0.0626535	0.0476802	0.028855	0.0662833	0.00757511	0.0139312
CCT6B	Unclassified	Unclassified	0.166161	0.206536	0.584142	0.0431608	0.0656312	0.0392221	0.0249131	0.0363947	0.0551431	0.0350213	0.0575696	0.0588019	0.362141	0.0515578	0.0471289	0.0454409	0.0778737	0.0139474	0.0292134
CCT7	Cytosol	C1	0.0503343	0.0648941	0.871667	0.0131051	0.0185331	0.0115931	0.00849648	0.0117116	0.0220354	0.0104041	0.0144185	0.0180361	0.680608	0.0670925	0.0425734	0.0206984	0.0606939	0.00476289	0.00834225
CCT8	Cytosol	Unclassified	0.0651916	0.0825376	0.833878	0.0183924	0.023476	0.015647	0.0108843	0.0151843	0.0227985	0.0144631	0.020977	0.024299	0.621585	0.0724024	0.0503645	0.0263096	0.0632171	0.00654482	0.0118476
CD109	Secretory	Unclassified	0.978522	0.00620985	0.00448268	0.0107859	0.520058	0.0934388	0.172426	0.192599	0.00214006	0.00155719	0.0015266	0.000985997	0.000984456	0.000823206	0.000857162	0.000883374	0.000934484	0.00975896	0.00102693
CD151	Secretory	Unclassified	0.964103	0.0144764	0.0100415	0.0113788	0.531429	0.143814	0.0609644	0.227896	0.00414313	0.0035811	0.00423215	0.00252001	0.00221151	0.00188714	0.00177426	0.00188916	0.00227944	0.00928108	0.0020977
CD276	Secretory	Unclassified	0.976086	0.00796722	0.0081206	0.00782574	0.571609	0.0656656	0.137207	0.201605	0.00254158	0.0018775	0.00190696	0.00164118	0.00202175	0.00146178	0.00145592	0.00147882	0.00170232	0.00491339	0.00291235
CD2AP	Cytosol	Unclassified	0.003825	0.00526866	0.989279	0.00162757	0.00113188	0.000868685	0.00079359	0.00103085	0.0010752	0.00108849	0.00116375	0.00194123	0.0170402	0.0301766	0.125322	0.193828	0.622911	0.000728905	0.000898669
CD2BP2	Nuclear	N1	0.0169665	0.958162	0.0209332	0.003938	0.00564762	0.00312608	0.00290434	0.00528842	0.916837	0.0147099	0.00976073	0.0168545	0.00693383	0.00311952	0.00288166	0.00310999	0.00488823	0.00158541	0.00235258
CD33	Secretory	Unclassified	0.983552	0.00328902	0.00327203	0.00988665	0.416267	0.253498	0.150138	0.163649	0.000919322	0.000826896	0.00086718	0.000675626	0.000663737	0.000634196	0.000660751	0.000642665	0.000670677	0.00837894	0.00150771
CD3EAP	Nuclear	N1	0.0284767	0.958634	0.00862596	0.00426315	0.0115779	0.00497026	0.00505773	0.00687073	0.838801	0.0236943	0.0943937	0.00174537	0.0020752	0.00161895	0.00159054	0.00159141	0.00174986	0.00242589	0.00183726
CD44	Secretory	Unclassified	0.985254	0.00178035	0.00212142	0.0108444	0.51359	0.110556	0.0542941	0.306813	0.000378076	0.000541798	0.00046151	0.000398963	0.000389542	0.000437375	0.000460989	0.000415149	0.000418364	0.0101863	0.000658082
CD46	Secretory	Unclassified	0.924463	0.0332482	0.024554	0.0177343	0.50127	0.223065	0.0501795	0.149949	0.0090036	0.00930106	0.00818244	0.00676112	0.00564372	0.00438921	0.00395454	0.00460868	0.00595789	0.0101673	0.007567
CD47	Secretory	Unclassified	0.976758	0.00551472	0.00531915	0.0124081	0.54754	0.118014	0.0331688	0.278035	0.00140667	0.0014407	0.00140621	0.00126115	0.00112922	0.00104204	0.00100914	0.000994764	0.00114399	0.0105259	0.00188219
CD55	Secretory	Unclassified	0.985501	0.00508099	0.00325553	0.00616239	0.522583	0.101503	0.126262	0.235153	0.00204848	0.00117335	0.00118772	0.000671436	0.000795686	0.000596152	0.000610359	0.000606872	0.000646466	0.00558184	0.00058055
CD58	Secretory	Unclassified	0.979006	0.00478273	0.00534089	0.0108707	0.488319	0.0878858	0.0330529	0.369748	0.00102797	0.00130323	0.00118036	0.00127117	0.00111475	0.00107497	0.0010067	0.000989685	0.00115477	0.00885594	0.00201479
CD63	Secretory	Unclassified	0.774927	0.114351	0.0780859	0.0326355	0.472127	0.190715	0.048695	0.0633904	0.0361744	0.0228241	0.0320979	0.0232547	0.0177797	0.0126015	0.0113451	0.014957	0.0214026	0.0133697	0.0192658
CD70	Secretory	Unclassified	0.972837	0.00212236	0.00261248	0.0224281	0.469836	0.203599	0.0856706	0.213732	0.000449676	0.000641902	0.000550487	0.000480292	0.000484899	0.000522318	0.000543849	0.000530145	0.000531266	0.0180864	0.00434167
CD81	Secretory	S1	0.951908	0.0219647	0.0129103	0.0132168	0.63894	0.12147	0.0522672	0.139232	0.00716145	0.00599881	0.00532053	0.00348389	0.0028822	0.00250144	0.0021832	0.00240385	0.00293957	0.0104215	0.00279525
CD82	Secretory	Unclassified	0.968808	0.014275	0.00919891	0.00771789	0.50387	0.116486	0.094713	0.253739	0.00568338	0.00303331	0.00316339	0.00239489	0.0020817	0.00173177	0.0016126	0.00172741	0.00204543	0.00618282	0.00153508
CD83	Secretory	Unclassified	0.985107	0.00233886	0.0024079	0.0101462	0.43854	0.206015	0.126226	0.214326	0.000544137	0.000700797	0.000608229	0.000485695	0.000467088	0.000490657	0.000498875	0.000474763	0.000476514	0.00942213	0.000724108
CD9	Secretory	Unclassified	0.961153	0.0158343	0.0115542	0.0114584	0.486509	0.143683	0.0712976	0.259664	0.00448967	0.00404102	0.00421233	0.00309123	0.00253019	0.00223012	0.0019986	0.00216412	0.00263113	0.00914927	0.00230913
CD99	Secretory	Unclassified	0.985801	0.0025283	0.00259767	0.00907283	0.519893	0.103536	0.0465854	0.315787	0.000581487	0.00073221	0.000673815	0.000540787	0.0005167	0.00052748	0.000534383	0.000496722	0.000522381	0.00851919	0.00055364
CD99L2	Secretory	Unclassified	0.953727	0.0167546	0.0139856	0.0155328	0.489478	0.163253	0.0471049	0.253891	0.00463753	0.00410852	0.00444784	0.0035607	0.00305458	0.00258867	0.00244631	0.00264762	0.00324845	0.0122716	0.00326121
CDA	Cytosol	Unclassified	0.00908874	0.0345817	0.952719	0.00361004	0.00283872	0.00200743	0.00178098	0.00246161	0.00293835	0.00270141	0.00294512	0.0259968	0.0175058	0.0290573	0.0234101	0.16046	0.722287	0.00148307	0.00212697
CDAN1	Cytosol	Unclassified	0.00359003	0.00404235	0.990789	0.00157833	0.00101966	0.000795046	0.000760832	0.0010145	0.00104702	0.000972279	0.00106432	0.000958732	0.246648	0.0162512	0.609665	0.0932178	0.025007	0.00066375	0.000914584
CDC123	Cytosol	Unclassified	0.00368102	0.00438917	0.990342	0.00158818	0.00109049	0.000812824	0.00076698	0.00101072	0.00108166	0.001025	0.00107162	0.00121088	0.039364	0.0154374	0.332368	0.375172	0.228	0.000699761	0.00088842
CDC16	Unclassified	Unclassified	0.108954	0.39564	0.480798	0.0146074	0.0364474	0.0169262	0.0175036	0.0380766	0.343576	0.0138229	0.0233099	0.0149312	0.398833	0.0222424	0.0171053	0.0121053	0.0305122	0.00508329	0.00952412
CDC20	Cytosol	C2	0.0165067	0.063202	0.912992	0.00729949	0.00439517	0.00306723	0.00315115	0.00589312	0.00371526	0.00475984	0.00468577	0.0500412	0.122686	0.637671	0.0243606	0.0083612	0.119913	0.00259211	0.00470738
CDC23	Nuclear	N1	0.087102	0.686029	0.214881	0.0119879	0.027965	0.0134048	0.0140174	0.0317148	0.628286	0.0158317	0.0252804	0.0166313	0.162338	0.0140108	0.0104295	0.00817578	0.0199262	0.00424987	0.00773801
CDC25A	Nuclear	N4	0.00699665	0.948464	0.0421006	0.00243918	0.002122	0.00159412	0.00147561	0.00180492	0.00180626	0.00327308	0.00223492	0.941149	0.00347823	0.0149915	0.00206151	0.00241948	0.0191499	0.00107063	0.00136854
CDC25B	Cytosol	C2	0.00387333	0.00639077	0.987874	0.00186177	0.00105124	0.000864322	0.000859778	0.00109799	0.000907575	0.00114927	0.00107679	0.00325713	0.115518	0.653663	0.0502766	0.00875924	0.159657	0.000826482	0.00103529
CDC25C	Cytosol	Unclassified	0.00567852	0.00685927	0.985162	0.00230009	0.00180918	0.00122193	0.00111828	0.00152913	0.00170468	0.00154207	0.0016865	0.00192603	0.0677043	0.0138295	0.300953	0.505159	0.0975161	0.000959438	0.00134065
CDC26	Unclassified	Unclassified	0.114123	0.342222	0.521182	0.0224722	0.0401847	0.0228565	0.0176606	0.0334217	0.253218	0.0209325	0.0393905	0.0286819	0.393461	0.0275707	0.0251344	0.0233678	0.0516479	0.00765298	0.0148193
CDC27	Nuclear	N1	0.0620352	0.910075	0.0228541	0.00503605	0.0270058	0.00710759	0.00994118	0.0179807	0.885711	0.00768767	0.013059	0.00361702	0.0134204	0.00232956	0.00219515	0.00196942	0.00293954	0.00227043	0.00276561
CDC37	Cytosol	Unclassified	0.00572865	0.00940458	0.98254	0.00232717	0.00173135	0.00134483	0.00117425	0.00147823	0.00163845	0.00160191	0.00179914	0.00436508	0.0117571	0.0405218	0.0301767	0.170532	0.729552	0.00102874	0.00129844
CDC37L1	Cytosol	Unclassified	0.00454568	0.00527224	0.98827	0.00191163	0.00137919	0.00101135	0.000935758	0.00121937	0.00133963	0.00124127	0.00132227	0.00136906	0.035271	0.0133424	0.346749	0.492435	0.100473	0.000831722	0.00107991
CDC42	Cytosol	C1	0.0218345	0.0130657	0.958123	0.00697712	0.00793568	0.00393316	0.00480918	0.00515646	0.00404986	0.00258227	0.00350848	0.00292506	0.663861	0.206072	0.0514349	0.0175498	0.0192054	0.00179429	0.00518282
CDC42BPA	Secretory	Unclassified	0.946453	0.0237745	0.0124182	0.0173542	0.252012	0.0715367	0.529785	0.0931191	0.0119345	0.00536523	0.00233727	0.00413756	0.00584425	0.00198224	0.00145646	0.00128607	0.0018492	0.0153736	0.00198066
CDC42BPG	Cytosol	C1	0.00414907	0.00413556	0.989611	0.00210435	0.00108263	0.000866797	0.000943512	0.00125613	0.000955455	0.000990108	0.00126658	0.000923417	0.654978	0.256169	0.0476081	0.012568	0.0182885	0.00068549	0.00141886
CDC42EP1	Secretory	Unclassified	0.929135	0.040889	0.0170251	0.0129508	0.413669	0.0652349	0.341287	0.108944	0.0265856	0.00651089	0.00419958	0.00359293	0.008619	0.00236716	0.00189974	0.00171675	0.00242249	0.0096316	0.00331915
CDC42EP2	Cytosol	Unclassified	0.010146	0.0104882	0.974458	0.00490772	0.00309434	0.00221005	0.00195583	0.00288582	0.00238207	0.00200464	0.00344609	0.00265543	0.497573	0.359948	0.0501413	0.0174004	0.0493951	0.0013681	0.00353962
CDC42EP3	Cytosol	Unclassified	0.0170993	0.0181889	0.957589	0.0071229	0.0053278	0.00371267	0.00353259	0.00452621	0.00340509	0.00309303	0.00372574	0.00796507	0.239982	0.610352	0.0442663	0.0110881	0.0518996	0.00251419	0.00460871
CDC42EP4	Cytosol	Unclassified	0.00457268	0.00543461	0.988045	0.00194729	0.00136258	0.00101527	0.000945286	0.00124955	0.0013497	0.00125896	0.00134229	0.00148367	0.0327294	0.0168615	0.408247	0.304901	0.225306	0.000847889	0.0010994
CDC42SE1	Secretory	Unclassified	0.878159	0.0568681	0.04341	0.0215627	0.532735	0.202435	0.0505924	0.0923971	0.0168279	0.0122389	0.0153125	0.0124889	0.00962902	0.00730855	0.00670888	0.00834953	0.0114141	0.0111363	0.0104264
CDC42SE2	Unclassified	Unclassified	0.438284	0.28051	0.2193	0.061905	0.288521	0.0546522	0.0353891	0.0597219	0.084244	0.0510736	0.079781	0.0654114	0.0481655	0.0346081	0.0279443	0.0425278	0.0660548	0.0189959	0.0429091
CDC45	Cytosol	Unclassified	0.0193898	0.283276	0.689721	0.00761308	0.00521366	0.00366612	0.00395437	0.0065557	0.00585405	0.00612369	0.00569167	0.265607	0.0507868	0.512997	0.0174938	0.00784872	0.100594	0.00280678	0.0048063
CDC5L	Nuclear	N1	0.00548721	0.989231	0.00402706	0.00125451	0.00292365	0.000816921	0.000860437	0.0008862	0.680449	0.0177267	0.289758	0.00129799	0.000802379	0.00079379	0.000815816	0.000768318	0.000846762	0.000780718	0.000473791
CDC7	Nuclear	N4	0.1428	0.790874	0.0436032	0.0227221	0.0297034	0.0179172	0.0587568	0.036423	0.0659933	0.0495651	0.0110839	0.664232	0.0152281	0.00894381	0.00477902	0.00474877	0.00990355	0.0134195	0.00930266
CDC73	Nuclear	N4	0.0213774	0.938975	0.0328073	0.00684027	0.00730537	0.00499007	0.00384023	0.00524172	0.00801116	0.00784059	0.00784151	0.915282	0.00502402	0.00888221	0.00357092	0.004547	0.0107832	0.002816	0.00402427
CDCA2	Nuclear	N3	0.00393017	0.992374	0.00209351	0.00160188	0.000782791	0.000970552	0.000480744	0.00169608	0.0297283	0.161146	0.800915	0.000584566	0.000400243	0.000419831	0.000464268	0.000419397	0.00038977	0.00107113	0.000530746
CDCA4	Cytosol	Unclassified	0.0300702	0.150889	0.808624	0.0104174	0.00961217	0.00735616	0.00587276	0.00722915	0.00893724	0.00777839	0.00968902	0.124484	0.016768	0.0512537	0.0167235	0.0344365	0.689442	0.00406188	0.00635551
CDCA5	Unclassified	Unclassified	0.120421	0.615522	0.211461	0.052596	0.0322949	0.0306572	0.0190106	0.0384581	0.0491678	0.306078	0.216709	0.0435674	0.0497353	0.0498303	0.0230054	0.0536017	0.0352884	0.0179544	0.0346415
CDCA7L	Nuclear	N3	0.0195922	0.951993	0.0149558	0.0134594	0.0061516	0.0033786	0.00244615	0.00761588	0.0141565	0.101695	0.830938	0.0052027	0.00293716	0.00265318	0.00240038	0.00301843	0.00394665	0.00927038	0.004189
CDCA8	Nuclear	Unclassified	0.167198	0.766529	0.0149106	0.0513623	0.0123021	0.0574127	0.0293444	0.0681391	0.112952	0.155827	0.493604	0.00414557	0.00303426	0.00288947	0.00286694	0.00294042	0.00317952	0.0290035	0.0223588
CDCP1	Secretory	Unclassified	0.970479	0.0109008	0.0092691	0.0093512	0.435763	0.127429	0.0837501	0.323536	0.00289845	0.00285105	0.0028069	0.00234437	0.00196758	0.00176249	0.00166344	0.00176663	0.00210896	0.0075952	0.00175599
CDH11	Secretory	Unclassified	0.98953	0.0019191	0.00263769	0.00591321	0.585172	0.0941485	0.0623527	0.247857	0.000382515	0.000545008	0.000490352	0.000501229	0.000506208	0.00053653	0.000546309	0.000514115	0.000534531	0.00457258	0.00134063
CDH12	Secretory	Unclassified	0.981427	0.00415718	0.00484342	0.00957194	0.531182	0.0812279	0.0405628	0.328455	0.000829078	0.00115334	0.00104961	0.00112515	0.000905598	0.000978617	0.00095435	0.000936696	0.00106815	0.00714281	0.00242913
CDH13	Secretory	Unclassified	0.984971	0.00298069	0.00240029	0.00964819	0.499153	0.102429	0.119418	0.263971	0.000839511	0.000892892	0.000788255	0.000460028	0.000491427	0.000464851	0.000502223	0.000471738	0.000470053	0.00922629	0.000421893
CDH2	Secretory	Unclassified	0.980509	0.00227676	0.00288047	0.0143337	0.364372	0.323442	0.111265	0.18143	0.000523256	0.000653914	0.000571885	0.000527705	0.000535481	0.000572271	0.00059947	0.000582993	0.000590253	0.0124785	0.00185526
CDIPT	Secretory	Unclassified	0.98625	0.002856	0.00263279	0.00826099	0.0106966	0.727199	0.208215	0.0401397	0.000888706	0.000723169	0.000693175	0.000550949	0.000510365	0.000539596	0.000543179	0.000516354	0.000523291	0.00540197	0.00285903
CDK1	Cytosol	Unclassified	0.00310611	0.0037439	0.991772	0.00137797	0.000877775	0.000701568	0.000670767	0.000856003	0.000849982	0.000868274	0.000895266	0.00113038	0.0642372	0.0419653	0.369715	0.0944948	0.421359	0.000624309	0.000753657
CDK10	Nuclear	Unclassified	0.00949904	0.971438	0.0131275	0.00593542	0.00215413	0.00201345	0.00132427	0.00400718	0.00669513	0.891304	0.0484117	0.0250267	0.00307747	0.00293896	0.0020064	0.00222283	0.00288188	0.00328913	0.0026463
CDK11A	Nuclear	N4	0.00683362	0.983795	0.00664312	0.00272845	0.00129839	0.000958192	0.00215537	0.00242167	0.00315976	0.0155443	0.00204935	0.963041	0.00106845	0.0023461	0.000787534	0.000915518	0.00152551	0.00142762	0.00130083
CDK11B	Nuclear	N4	0.0128691	0.965783	0.0171761	0.0041718	0.00354809	0.00259264	0.00386825	0.00286008	0.00601958	0.0128312	0.00457278	0.942359	0.0029222	0.00328435	0.00238009	0.00277023	0.00581928	0.00176439	0.00240741
CDK12	Nuclear	N4	0.0101652	0.97105	0.0152325	0.00355207	0.00319135	0.002284	0.00201382	0.00267603	0.00474075	0.00727099	0.00378039	0.955258	0.00224723	0.0044769	0.00185135	0.00218719	0.00446986	0.00158275	0.00196932
CDK14	Cytosol	Unclassified	0.00652886	0.00775928	0.983033	0.00267899	0.00202285	0.00143624	0.00129592	0.00177385	0.00192983	0.00171689	0.00193804	0.00217453	0.115366	0.0148187	0.693101	0.145849	0.0138978	0.00107894	0.00160005
CDK16	Cytosol	Unclassified	0.00289139	0.00316898	0.992546	0.00139403	0.000781925	0.000648484	0.000620594	0.000840388	0.000729955	0.000834492	0.000869378	0.000735154	0.563175	0.185692	0.197216	0.017104	0.0293575	0.000597665	0.000796367
CDK17	Cytosol	Unclassified	0.133813	0.0371756	0.804757	0.0242541	0.0555951	0.0228261	0.033814	0.0215778	0.0133848	0.00664799	0.0087485	0.00839424	0.457643	0.251229	0.0465415	0.0173178	0.0320262	0.00575247	0.0185017
CDK19	Nuclear	N1	0.0174413	0.969407	0.0100939	0.00305734	0.00528107	0.00223319	0.00341516	0.00651187	0.920046	0.0199769	0.00674025	0.0226442	0.00297249	0.00189259	0.00147421	0.00146337	0.00229127	0.00141814	0.00163921
CDK2	Cytosol	Unclassified	0.005463	0.00661992	0.985455	0.00246249	0.00150481	0.0012305	0.00119286	0.00153483	0.00148168	0.00146872	0.00158105	0.00208846	0.106389	0.195386	0.179464	0.0337937	0.470422	0.00105279	0.0014097
CDK2AP1	Nuclear	N1	0.023523	0.947168	0.0228526	0.00645688	0.00776107	0.00496837	0.00432098	0.00647259	0.592898	0.11223	0.225977	0.0160629	0.004894	0.00386278	0.00386374	0.00435802	0.00587401	0.00292135	0.00353553
CDK4	Cytosol	Unclassified	0.003841	0.0043613	0.990021	0.00177656	0.00105727	0.000815201	0.000816431	0.0011521	0.00107844	0.0010309	0.00113366	0.0011183	0.327876	0.0407074	0.476668	0.050554	0.0942168	0.00072839	0.00104817
CDK5	Cytosol	Unclassified	0.00352807	0.00463503	0.990189	0.00164756	0.000972847	0.000778465	0.000765853	0.0010109	0.000886043	0.00101347	0.000987646	0.00174787	0.216201	0.344931	0.198277	0.0190811	0.211699	0.000732417	0.000915147
CDK5RAP1	Mitochondria	M1	0.0858026	0.0559116	0.0124451	0.845841	0.00314861	0.00814858	0.0640065	0.0104989	0.00295043	0.0181112	0.014234	0.020616	0.00249285	0.00257872	0.00236132	0.00234218	0.00267002	0.804258	0.0415826
CDK5RAP3	Secretory	Unclassified	0.941716	0.00248257	0.00277332	0.0530282	0.0475077	0.43488	0.378076	0.0812523	0.000459799	0.000857736	0.000654424	0.000510608	0.000478178	0.000560333	0.000601901	0.000579324	0.00055358	0.0456789	0.00734938
CDK7	Nuclear	N4	0.0101813	0.959326	0.0267839	0.00370862	0.00337352	0.00233975	0.00192366	0.00254433	0.00331925	0.0038471	0.00367155	0.948488	0.0030119	0.0138204	0.00201719	0.00232892	0.00560554	0.00159113	0.00211749
CDK8	Nuclear	N1	0.0184591	0.967607	0.00997287	0.00396143	0.00626983	0.00240728	0.00504493	0.00473706	0.786488	0.087459	0.00812017	0.0855389	0.00235157	0.00173977	0.00172975	0.00176902	0.00238276	0.00217818	0.00178325
CDK9	Nuclear	N4	0.0042946	0.987526	0.00666499	0.00151418	0.00121646	0.000928643	0.000943242	0.00120625	0.00326664	0.00523322	0.00159612	0.97743	0.000983097	0.00203528	0.000875816	0.00102748	0.00174331	0.000682124	0.000832054
CDKAL1	Secretory	Unclassified	0.967187	0.00212401	0.00247656	0.0282124	0.0676526	0.59523	0.206408	0.0978965	0.000455784	0.000658511	0.000555327	0.000454384	0.000434644	0.000497064	0.000528722	0.00051603	0.000500095	0.0223022	0.00591023
CDKN1A	Nuclear	N4	0.00538924	0.979233	0.0133213	0.00205673	0.00163358	0.00119858	0.0011046	0.00145248	0.00124259	0.00194743	0.00178566	0.974257	0.0018095	0.00635341	0.00105331	0.00116077	0.00294433	0.000950344	0.00110639
CDKN1B	Nuclear	N4	0.0127548	0.962485	0.0197425	0.00501751	0.00415391	0.0026918	0.00254277	0.00336633	0.00421025	0.00441685	0.00480592	0.949052	0.00328195	0.00453782	0.00222204	0.00279683	0.00690381	0.00216794	0.00284957
CDKN1C	Nuclear	N4	0.0069553	0.956668	0.033899	0.00247787	0.00205613	0.00152018	0.00147949	0.00189949	0.00175953	0.0029518	0.00222789	0.949729	0.00298776	0.0150684	0.00153044	0.00165932	0.012653	0.00110133	0.00137654
CDKN2A	Cytosol	Unclassified	0.00600642	0.0075014	0.984081	0.00241166	0.00194067	0.00129908	0.00116213	0.00160454	0.00182708	0.00165789	0.00183509	0.00218134	0.0291763	0.014852	0.188636	0.621655	0.129761	0.00100131	0.00141035
CDKN2AIP	Nuclear	N4	0.0527358	0.900655	0.035724	0.0108855	0.0110604	0.00814757	0.0254922	0.00803566	0.019426	0.0205392	0.0136444	0.847045	0.00623727	0.00614789	0.00515265	0.0064536	0.0117325	0.00432821	0.00655731
CDKN2AIPNL	Cytosol	Unclassified	0.0522923	0.230453	0.701157	0.016097	0.0149795	0.011152	0.00944964	0.0167111	0.0243481	0.0239161	0.0202172	0.161972	0.0874956	0.445003	0.023313	0.0201732	0.125173	0.00596398	0.0101331
CDKN2C	Cytosol	Unclassified	0.0044129	0.00545509	0.988275	0.00185716	0.00135619	0.000986808	0.000894826	0.00117508	0.00132075	0.00124217	0.00130239	0.00158978	0.0262432	0.0148573	0.160064	0.56599	0.22112	0.000813962	0.0010432
CDNF	Nuclear	N4	0.0238207	0.920887	0.0428101	0.0124827	0.00587167	0.00396912	0.00600917	0.00797074	0.00556596	0.0126236	0.00834677	0.89435	0.00520599	0.0231083	0.00330819	0.00378117	0.00740645	0.00632459	0.00615811
CDO1	Cytosol	Unclassified	0.061375	0.0805867	0.838885	0.019153	0.0213388	0.0151318	0.0102521	0.0146524	0.0188605	0.015043	0.0223859	0.0242973	0.608944	0.0965124	0.0486991	0.0246953	0.0600347	0.00668395	0.012469
CDON	Secretory	Unclassified	0.966754	0.0131454	0.00903387	0.0110672	0.514815	0.0842201	0.218043	0.149675	0.0053141	0.00281749	0.00301049	0.00200334	0.00229602	0.00161402	0.0015939	0.00166268	0.00186724	0.00877345	0.00229373
CDPF1	Nuclear	N4	0.00644192	0.957508	0.0336055	0.00244493	0.00191666	0.00135782	0.00127791	0.00188952	0.00252326	0.00288627	0.00212613	0.949972	0.00294913	0.0225985	0.00159183	0.00144434	0.00502161	0.00111438	0.00133055
CDR2	Cytosol	Unclassified	0.00263319	0.00288858	0.993224	0.00125456	0.000715778	0.000576783	0.000583949	0.000756679	0.00067943	0.000748475	0.000751302	0.000709372	0.367039	0.205206	0.252691	0.0278355	0.140452	0.000549748	0.000704815
CDS1	Secretory	Unclassified	0.985184	0.00173015	0.00227964	0.0108064	0.0933964	0.615006	0.216569	0.0602127	0.000384564	0.000517044	0.000418295	0.000410244	0.000426131	0.000435251	0.000475978	0.000490652	0.000451624	0.00886618	0.00194024
CDS2	Secretory	Unclassified	0.735966	0.0264609	0.07063	0.166943	0.183516	0.14875	0.289707	0.113994	0.00650209	0.00643775	0.00881684	0.00470425	0.0309901	0.0153205	0.0102934	0.006584	0.00744202	0.0156264	0.151317
CDT1	Nuclear	N4	0.0151162	0.742175	0.236863	0.00584542	0.00404899	0.00277994	0.00277357	0.00551372	0.00389297	0.0068145	0.0050476	0.72642	0.0257002	0.176517	0.00713521	0.00388758	0.0236231	0.00227271	0.00357271
CDV3	Cytosol	Unclassified	0.0254853	0.0321274	0.93417	0.0082177	0.00870574	0.00621903	0.0046765	0.005884	0.00783946	0.00596451	0.00833605	0.00998742	0.0262198	0.0201252	0.0519979	0.530064	0.305763	0.0029868	0.0052309
CDYL	Nuclear	Unclassified	0.0381941	0.922564	0.0273938	0.0118482	0.00849337	0.0066568	0.0152273	0.00781657	0.0441077	0.557233	0.0224585	0.298765	0.00521189	0.00457954	0.0045562	0.00518986	0.00785635	0.00546895	0.00637924
CEBPD	Nuclear	Unclassified	0.0717227	0.834243	0.0635358	0.030498	0.0239589	0.017173	0.0106653	0.0199256	0.0426904	0.678686	0.0824379	0.0304291	0.0128599	0.0102443	0.00978591	0.0124392	0.0182065	0.0150589	0.0154391
CEBPG	Nuclear	Unclassified	0.0168141	0.954523	0.0090235	0.0196394	0.0031552	0.00361596	0.00316247	0.00688043	0.013017	0.591877	0.341052	0.00857657	0.00205397	0.00180983	0.00152958	0.00148722	0.0021429	0.0114013	0.00823806
CEBPZ	Nuclear	N3	0.0161492	0.96674	0.0112926	0.00581811	0.00336899	0.00223622	0.00170292	0.00884104	0.0226531	0.0993123	0.841077	0.00369758	0.00239928	0.00203978	0.00183798	0.0021733	0.00284227	0.00381878	0.00199933
CEBPZOS	Unclassified	Unclassified	0.451582	0.0660873	0.0295636	0.452767	0.0416461	0.0980937	0.20301	0.108832	0.0131183	0.018893	0.0245159	0.00956009	0.00612214	0.0052936	0.00517938	0.00571369	0.00725482	0.0709739	0.381793
CELF1	Nuclear	Unclassified	0.0111837	0.98002	0.0044926	0.00430399	0.00422149	0.00227066	0.0029084	0.00178315	0.128763	0.652959	0.193447	0.00485111	0.000845998	0.000867576	0.00095332	0.000876527	0.000949176	0.00299802	0.00130597
CELSR1	Secretory	Unclassified	0.986468	0.00134037	0.00180567	0.0103859	0.5546	0.118487	0.074299	0.239082	0.000253347	0.000433092	0.000347889	0.00030604	0.000322992	0.000365447	0.000397754	0.000367147	0.00035233	0.00937718	0.00100872
CENPB	Nuclear	N3	0.0157413	0.960407	0.0129983	0.0108536	0.00463952	0.00307569	0.00225214	0.00577399	0.0140756	0.140654	0.801189	0.00448766	0.00252586	0.00223374	0.00221169	0.00264417	0.00338284	0.0077856	0.00306804
CENPC	Nuclear	Unclassified	0.0249917	0.940475	0.0209998	0.0135334	0.00784145	0.00476179	0.00327831	0.00911011	0.0190984	0.17717	0.736115	0.00809107	0.00423014	0.00365554	0.00330223	0.00419483	0.00561712	0.00870039	0.00483303
CENPF	Nuclear	Unclassified	0.0161455	0.931594	0.0140551	0.0382051	0.00297924	0.00358335	0.00370764	0.00587523	0.00725673	0.768281	0.0884663	0.0675903	0.00293388	0.00301822	0.00243782	0.0025467	0.00311846	0.0292404	0.00896478
CENPI	Nuclear	Unclassified	0.00324328	0.98825	0.00325234	0.00525402	0.000676943	0.000587234	0.000597574	0.00138152	0.00454721	0.645133	0.336964	0.00160566	0.000601315	0.000675055	0.000672869	0.000637727	0.000665377	0.00358553	0.00166849
CENPJ	Cytosol	Unclassified	0.0141298	0.0113368	0.968715	0.0058179	0.00395491	0.0025815	0.00295915	0.00463422	0.00297218	0.00243997	0.00313953	0.00278517	0.456573	0.39937	0.0404152	0.0120668	0.0602906	0.00157	0.0042479
CENPN	Nuclear	Unclassified	0.00947001	0.974261	0.00704828	0.00922102	0.00222786	0.00156358	0.00116659	0.00451198	0.0114904	0.270436	0.689508	0.002826	0.00136596	0.00128248	0.00134513	0.00140925	0.00164547	0.00699365	0.00222737
CENPO	Nuclear	Unclassified	0.0225386	0.923755	0.0168202	0.0368866	0.00384475	0.00425442	0.00826758	0.00617181	0.00839178	0.439802	0.0472412	0.42832	0.00345148	0.00334038	0.00276424	0.00296226	0.00430182	0.0276916	0.00919493
CENPP	Nuclear	Unclassified	0.0333465	0.923141	0.0286549	0.0148576	0.0104298	0.00627369	0.00419785	0.0124452	0.0244435	0.153125	0.734413	0.0111592	0.00624667	0.00504291	0.00421265	0.00553274	0.00761997	0.00864457	0.00621307
CENPQ	Nuclear	N3	0.0227536	0.966905	0.00407507	0.00626616	0.00168127	0.00235733	0.00127074	0.0174442	0.0396185	0.106418	0.819741	0.00112839	0.000819464	0.00079624	0.000820311	0.000806583	0.000832476	0.00362824	0.00263793
CENPT	Nuclear	N3	0.00488941	0.985417	0.00325874	0.00643519	0.00111097	0.000639008	0.000626933	0.0025125	0.00929542	0.11002	0.865225	0.000875612	0.000601737	0.000614509	0.000656691	0.00066701	0.000718793	0.0052863	0.00114888
CENPU	Nuclear	N3	0.0141726	0.977046	0.00542178	0.00335966	0.00251043	0.00329322	0.00205284	0.00631614	0.0554786	0.104528	0.81569	0.00134869	0.00123759	0.00102993	0.000982409	0.00107307	0.00109877	0.00169111	0.00166855
CENPV	Nuclear	Unclassified	0.0134164	0.974042	0.00704083	0.00550124	0.00364285	0.00333353	0.00308449	0.00335551	0.126373	0.259114	0.58538	0.00317485	0.00136378	0.00134178	0.00140711	0.00139552	0.00153264	0.00332855	0.00217269
CENPW	Nuclear	Unclassified	0.0862884	0.817357	0.0614328	0.034922	0.0227403	0.0165624	0.0107042	0.0362816	0.0390007	0.145619	0.612023	0.0207149	0.0119342	0.0101777	0.00943135	0.0127568	0.0171328	0.0146847	0.0202372
CENPX	Nuclear	Unclassified	0.0682022	0.851238	0.0568732	0.0236869	0.0151989	0.0152466	0.0128739	0.0248828	0.0809671	0.14164	0.6143	0.0143305	0.0137407	0.0104999	0.00848485	0.0111419	0.0130058	0.00780902	0.0158779
CEP104	Cytosol	Unclassified	0.002616	0.00295471	0.993122	0.00130705	0.000668506	0.000562304	0.00058035	0.000804837	0.000640825	0.000779865	0.000880544	0.000653471	0.530152	0.308353	0.0959397	0.0212421	0.0374348	0.000521187	0.000785865
CEP112	Cytosol	Unclassified	0.00381908	0.00397491	0.990431	0.00177507	0.00107444	0.000846171	0.000838306	0.00106016	0.000986966	0.00102957	0.00106498	0.000893399	0.405273	0.203812	0.27574	0.0300057	0.0756001	0.000734488	0.00104059
CEP131	Unclassified	N1	0.394555	0.589677	0.00940104	0.00636686	0.264669	0.0297336	0.0772275	0.0229246	0.572216	0.00677094	0.00618831	0.00450195	0.00244669	0.00155108	0.00163457	0.0017671	0.00200159	0.00427361	0.00209324
CEP135	Unclassified	Unclassified	0.143981	0.179233	0.55206	0.124726	0.028104	0.0345169	0.0276364	0.0537238	0.0146132	0.0355484	0.061363	0.0677088	0.135974	0.281121	0.0414454	0.0352244	0.0582947	0.0462234	0.0785023
CEP152	Unclassified	Unclassified	0.164768	0.149007	0.465815	0.22041	0.0325368	0.0441375	0.0366804	0.0514134	0.0166972	0.0303786	0.0649069	0.0370243	0.0958362	0.234334	0.0455615	0.0462093	0.0438736	0.0631345	0.157276
CEP170B	Cytosol	C2	0.00498569	0.00727853	0.985389	0.00234681	0.00131066	0.00103898	0.00109102	0.00154504	0.00147398	0.00148922	0.00150109	0.00281424	0.0565792	0.645535	0.0256593	0.00954352	0.248072	0.00098017	0.00136664
CEP192	Cytosol	Unclassified	0.0266278	0.0260797	0.930378	0.0169145	0.00684496	0.00684429	0.00583805	0.00710045	0.00410616	0.00498528	0.010664	0.00632425	0.196504	0.612794	0.0564692	0.035438	0.0291727	0.00476324	0.0121513
CEP250	Cytosol	Unclassified	0.0444068	0.0366831	0.888705	0.0302051	0.00995834	0.0101861	0.00933632	0.0149261	0.00469925	0.00814995	0.0142221	0.00961178	0.235441	0.536874	0.0502881	0.024371	0.0417312	0.00747658	0.0227285
CEP295	Unclassified	Unclassified	0.523226	0.0519559	0.388516	0.0363026	0.201165	0.0752944	0.156385	0.0903822	0.0221399	0.00995825	0.0120447	0.00781296	0.319331	0.0300849	0.0146444	0.00911726	0.0153386	0.0121428	0.0241599
CEP350	Unclassified	Unclassified	0.340258	0.0732508	0.553009	0.0334825	0.135605	0.0455237	0.0807139	0.0784147	0.0314326	0.0131291	0.0141963	0.0144928	0.445103	0.0516225	0.0194311	0.0111432	0.025709	0.0114473	0.0220353
CEP41	Cytosol	Unclassified	0.00478866	0.00538654	0.987782	0.00204303	0.00139801	0.00104253	0.000993049	0.00135506	0.00143344	0.00127863	0.00143298	0.00124149	0.251157	0.0224665	0.55328	0.117844	0.0430342	0.000841422	0.00120161
CEP55	Unclassified	Unclassified	0.130571	0.139517	0.600971	0.128941	0.0331306	0.0347405	0.0271531	0.0355465	0.0198921	0.0253508	0.0527204	0.0415541	0.124634	0.315695	0.0502832	0.0600176	0.0503416	0.0409104	0.0880301
CEP57	Secretory	Unclassified	0.794286	0.00787806	0.00774148	0.190095	0.0933269	0.448985	0.0964981	0.155476	0.00177357	0.00237955	0.00230587	0.00141906	0.0016009	0.00154392	0.00146966	0.00155848	0.00156853	0.0250596	0.165035
CEP63	Mitochondria	M2	0.0403874	0.0196523	0.00520466	0.934756	0.00461868	0.00436214	0.01005	0.0213565	0.00114849	0.00594681	0.0115551	0.00100184	0.00100798	0.00109454	0.000994268	0.00105778	0.00105009	0.20242	0.732336
CEP76	Cytosol	Unclassified	0.0065419	0.00919357	0.98149	0.0027746	0.00186175	0.00151942	0.00140109	0.00175964	0.00186972	0.00179913	0.00197639	0.00354833	0.05851	0.0713762	0.0552448	0.0676019	0.728757	0.00121056	0.00156404
CEP78	Cytosol	C1	0.107399	0.0381036	0.8378	0.0166973	0.0457551	0.0171055	0.0214824	0.0230558	0.0151744	0.00655345	0.00936926	0.00700644	0.647634	0.0922062	0.0536867	0.019267	0.0250065	0.00483637	0.011861
CEP83	Cytosol	C2	0.00565249	0.0167589	0.974892	0.0026965	0.00156769	0.00122169	0.00114819	0.00171492	0.0013514	0.00185883	0.00194445	0.0116042	0.144244	0.657927	0.0292956	0.00870465	0.134721	0.00110663	0.00158987
CEP89	Secretory	Unclassified	0.961216	0.00253574	0.00333516	0.0329132	0.109783	0.552712	0.202007	0.0967148	0.000521451	0.00084523	0.000706423	0.000462637	0.000674843	0.000681744	0.000667233	0.000687916	0.000623425	0.0149111	0.018002
CEP95	Cytosol	Unclassified	0.103853	0.0328618	0.824314	0.038971	0.0324114	0.0211138	0.0289645	0.0213632	0.0102941	0.00573035	0.0105872	0.00625015	0.511504	0.213257	0.0491968	0.0170942	0.0332622	0.00552427	0.0334467
CEP97	Cytosol	C1	0.00331493	0.00373073	0.991395	0.0015594	0.000908219	0.000730835	0.000700218	0.000975654	0.000908225	0.000941255	0.00100866	0.000872595	0.698497	0.0753155	0.18705	0.0240633	0.006469	0.000638787	0.000920609
CEPT1	Secretory	Unclassified	0.612369	0.157135	0.159473	0.0710229	0.274099	0.108148	0.12223	0.107893	0.0453279	0.0282516	0.0453855	0.0381702	0.0414003	0.0276344	0.0240814	0.0276668	0.0386897	0.0157115	0.0553114
CERCAM	Nuclear	N4	0.0278574	0.906355	0.0541683	0.0116191	0.00525428	0.00358351	0.00646739	0.0125522	0.00558391	0.0175993	0.00744295	0.875729	0.00728655	0.0318539	0.00340136	0.00286371	0.00876283	0.00519755	0.00642152
CERK	Secretory	Unclassified	0.989821	0.00187918	0.00216877	0.00613107	0.528791	0.132366	0.105699	0.222966	0.000490372	0.000549368	0.000457248	0.000382191	0.00045809	0.000422338	0.00044412	0.000421499	0.000422729	0.00580229	0.000328782
CERS1	Secretory	Unclassified	0.987368	0.00141873	0.00231627	0.00889738	0.122358	0.544219	0.267236	0.0535543	0.000295997	0.000403215	0.000297294	0.000422225	0.000505731	0.000429632	0.000463395	0.000484459	0.000433054	0.0081521	0.000745287
CERS2	Secretory	Unclassified	0.980891	0.00496619	0.00299186	0.0111513	0.00850693	0.661514	0.27841	0.0324598	0.00173419	0.00114762	0.0014269	0.000657475	0.000567273	0.000587516	0.000614696	0.00060752	0.000614858	0.00858067	0.00257064
CERS5	Secretory	Unclassified	0.946669	0.00400255	0.00302511	0.0463029	0.0245827	0.614312	0.240896	0.0668786	0.000804894	0.00140629	0.00123661	0.000554767	0.000570427	0.000592514	0.000630627	0.00063179	0.000599753	0.0352444	0.0110585
CES1	Nuclear	N4	0.021923	0.935772	0.033603	0.00870166	0.00544772	0.00364248	0.00615103	0.00668175	0.00571453	0.0119652	0.00729298	0.9108	0.00414947	0.0166445	0.00291751	0.00347076	0.00642075	0.00416206	0.0045396
CES2	Nuclear	N4	0.0784269	0.778741	0.122651	0.0201811	0.0269305	0.0162881	0.0148584	0.0203499	0.0326952	0.0201292	0.0197276	0.706189	0.0279374	0.0386143	0.0108065	0.0130079	0.0322849	0.00868484	0.0114963
CES3	Nuclear	N4	0.0336815	0.881844	0.0726913	0.0117832	0.0111044	0.00740913	0.00628163	0.0088863	0.00889959	0.0110713	0.0116421	0.850231	0.00984071	0.0365455	0.00567671	0.00670607	0.0139224	0.00459989	0.00718327
CETN2	Unclassified	Unclassified	0.1563	0.559797	0.220455	0.0634482	0.0233362	0.0288558	0.024612	0.079496	0.0332943	0.125229	0.366651	0.0346222	0.0750419	0.0589021	0.0225903	0.0236609	0.04026	0.0174701	0.0459781
CFAP20	Cytosol	Unclassified	0.029493	0.0714285	0.888247	0.010831	0.00730195	0.00583737	0.0050729	0.0112808	0.00789641	0.015085	0.0157237	0.0327234	0.211757	0.550109	0.0269356	0.0198092	0.0796361	0.00381136	0.00701967
CFAP46	Nuclear	N4	0.0169101	0.954303	0.0202536	0.00853376	0.00362785	0.00288065	0.00460107	0.00580049	0.00701344	0.193247	0.0142967	0.739746	0.00325682	0.00787369	0.00241552	0.00246013	0.00424747	0.00480976	0.003724
CFAP97	Cytosol	C1	0.0054564	0.00548456	0.986968	0.0020913	0.00165723	0.0011579	0.00109399	0.00154728	0.00158987	0.00116098	0.00148287	0.00125084	0.790087	0.134338	0.0356976	0.0113267	0.0155186	0.000740123	0.00135118
CFDP1	Unclassified	Unclassified	0.130582	0.504211	0.327278	0.0379297	0.0490699	0.0304793	0.0213332	0.0296992	0.0497069	0.0309074	0.0512299	0.372366	0.0368601	0.0294881	0.0211558	0.0336528	0.206121	0.0127778	0.025152
CFH	Secretory	Unclassified	0.820117	0.0615368	0.0142555	0.104091	0.0433654	0.0305994	0.680562	0.0655895	0.0106129	0.0158351	0.00551575	0.0295731	0.0033481	0.00305248	0.0024424	0.00240852	0.00300398	0.096044	0.00804701
CFL1	Cytosol	Unclassified	0.00586369	0.00878436	0.983037	0.0023147	0.00187521	0.00131804	0.00114939	0.00152105	0.00175269	0.00158717	0.00179844	0.00364605	0.0169501	0.0248216	0.0404305	0.275025	0.62581	0.000968	0.0013467
CFL2	Cytosol	Unclassified	0.00451136	0.00554994	0.987936	0.00200293	0.00126874	0.000998243	0.000956247	0.00128813	0.00128789	0.00123449	0.0013431	0.00168446	0.0792633	0.0536641	0.283577	0.113531	0.457901	0.000858348	0.00114459
CFLAR	Cytosol	Unclassified	0.00838084	0.00989139	0.978441	0.003287	0.00257562	0.0019933	0.00169774	0.00211418	0.00236156	0.00221299	0.0025797	0.00273714	0.254535	0.0313824	0.596057	0.0515808	0.0448856	0.00135606	0.00193094
CGA	Cytosol	Unclassified	0.0455319	0.114234	0.821591	0.0186432	0.0133381	0.00967338	0.00844914	0.0140713	0.00939937	0.0111664	0.0119248	0.0817431	0.102097	0.482006	0.0350137	0.0225483	0.179926	0.00673013	0.0119131
CGGBP1	Nuclear	N4	0.0125304	0.862378	0.121005	0.0040867	0.00343975	0.0023527	0.00231751	0.00442042	0.0089344	0.00621489	0.00406393	0.843165	0.00934103	0.0865526	0.00400275	0.00274301	0.0183651	0.00168145	0.00240525
CGN	Cytosol	Unclassified	0.0413709	0.0396195	0.888128	0.0308812	0.0105636	0.00959415	0.0077414	0.0134718	0.00466646	0.00703048	0.0140919	0.0138307	0.197303	0.580146	0.0419748	0.018636	0.0500692	0.00894543	0.0219357
CGRRF1	Secretory	Unclassified	0.87423	0.00878615	0.00573396	0.11125	0.0780692	0.228096	0.453426	0.114639	0.00136841	0.0036228	0.00282774	0.000967197	0.00138353	0.00115381	0.00107336	0.00105206	0.00107121	0.082409	0.0288412
CHAC2	Cytosol	Unclassified	0.0106653	0.0149195	0.97053	0.00388523	0.00358869	0.00241125	0.00200065	0.00266474	0.00324902	0.00277116	0.00338638	0.00551293	0.0305246	0.0243563	0.0437236	0.293006	0.57892	0.00150833	0.0023769
CHAF1A	Nuclear	Unclassified	0.00371993	0.990231	0.00323778	0.00281125	0.000904635	0.000792869	0.0010253	0.00099713	0.0201737	0.764477	0.20215	0.00343045	0.000579461	0.000628252	0.000721687	0.000630118	0.000678264	0.00177586	0.00103539
CHAF1B	Nuclear	Unclassified	0.00547025	0.985683	0.0055932	0.00325354	0.00115907	0.000966702	0.00131696	0.00202751	0.00689019	0.904031	0.0186496	0.0561119	0.00109858	0.00114341	0.00106892	0.000998802	0.00128348	0.00189726	0.00135628
CHAMP1	Nuclear	Unclassified	0.038574	0.904854	0.0394507	0.0171209	0.0125112	0.00956234	0.00658377	0.00991668	0.0187114	0.726626	0.0334197	0.126097	0.00782124	0.00684911	0.00620908	0.00753439	0.0110369	0.0083637	0.00875722
CHCHD1	Mitochondria	M1	0.055574	0.0672259	0.0302301	0.84697	0.00887133	0.00977377	0.0163491	0.0205798	0.00798543	0.0153392	0.0312646	0.0126367	0.0059715	0.00520211	0.00527729	0.00583578	0.00794343	0.635034	0.211936
CHCHD2	Unclassified	Unclassified	0.154382	0.268651	0.0789545	0.498013	0.0234465	0.0361753	0.0630995	0.0316605	0.0250417	0.0343086	0.0525686	0.156732	0.0163225	0.0139569	0.0119796	0.0149113	0.0217842	0.456933	0.0410797
CHCHD3	Mitochondria	M2	0.017098	0.00752555	0.00530821	0.970068	0.00294985	0.0019042	0.00122187	0.0110221	0.00135191	0.00200133	0.0029874	0.00118492	0.00101076	0.00102869	0.00103266	0.00100281	0.0012333	0.0109178	0.959151
CHCHD5	Unclassified	Unclassified	0.247515	0.39926	0.254297	0.0989288	0.0952413	0.0554307	0.0368934	0.0599492	0.0908612	0.0582715	0.087459	0.162668	0.0535405	0.0392914	0.031238	0.0477676	0.0824591	0.0534868	0.045442
CHCHD6	Mitochondria	M2	0.0140656	0.00338953	0.00360884	0.978936	0.00337298	0.00279972	0.001354	0.00653888	0.000731557	0.00095277	0.00092304	0.000782161	0.000760486	0.000739897	0.000713636	0.000637153	0.000757666	0.00545438	0.973482
CHD1	Nuclear	N3	0.0260623	0.82624	0.0059675	0.14173	0.004652	0.0027302	0.00744675	0.0112334	0.00675527	0.0576122	0.760313	0.00155904	0.00111483	0.00116481	0.00122258	0.00122911	0.00123618	0.0956907	0.0460396
CHD1L	Nuclear	N4	0.103303	0.818168	0.0575966	0.0209329	0.0207737	0.0123558	0.0342787	0.0358943	0.022705	0.0255799	0.00901219	0.760871	0.0184786	0.0162179	0.00504543	0.00462774	0.013227	0.0114693	0.00946351
CHD2	Nuclear	N3	0.00534631	0.986029	0.00429974	0.00432542	0.00111889	0.000825113	0.000596823	0.00280548	0.0103206	0.195208	0.779279	0.00122142	0.00082501	0.000819252	0.000817526	0.000883493	0.000954459	0.00314881	0.00117662
CHD3	Nuclear	N1	0.00337308	0.993646	0.00211846	0.000862275	0.00165313	0.000531619	0.000616976	0.000571352	0.981688	0.00194724	0.00956554	0.000445716	0.000330137	0.00043223	0.000493141	0.000447167	0.000415783	0.000494985	0.00036729
CHD4	Nuclear	Unclassified	0.00526614	0.986054	0.00579117	0.00288918	0.00114548	0.000954893	0.00149014	0.00167563	0.00725337	0.830477	0.0105712	0.137752	0.00107301	0.00113397	0.00111035	0.00109039	0.00138346	0.00157709	0.00131209
CHD6	Nuclear	N1	0.0179732	0.9763	0.00389228	0.00183473	0.0110796	0.00219577	0.00254001	0.00215785	0.960583	0.00203967	0.0127539	0.000923655	0.000760915	0.000733639	0.000790929	0.000787741	0.000819054	0.0010093	0.000825428
CHD7	Nuclear	Unclassified	0.100268	0.867965	0.0150591	0.0167078	0.0205831	0.040648	0.0205859	0.0184509	0.246343	0.074674	0.542712	0.00423594	0.00322433	0.00290191	0.0028169	0.00290707	0.00320886	0.0109411	0.00576674
CHD8	Nuclear	N4	0.00635519	0.97022	0.0212599	0.00216527	0.00181949	0.00128286	0.00121427	0.00203857	0.00283396	0.00355206	0.00208498	0.961749	0.00224854	0.0133904	0.00131607	0.00132323	0.00298166	0.000948719	0.00121655
CHD9	Nuclear	N4	0.00732803	0.984213	0.00586761	0.00259158	0.00112784	0.000914267	0.00250387	0.00278206	0.00275355	0.0359273	0.00230764	0.943224	0.0010057	0.00175894	0.000812853	0.000847054	0.00144307	0.00136593	0.00122565
CHDH	Mitochondria	M2	0.0198383	0.0133278	0.00732066	0.959513	0.00415239	0.00240936	0.00348732	0.00978919	0.00177079	0.00333332	0.00631044	0.00191326	0.00125082	0.00134756	0.00143055	0.00147749	0.00181424	0.0431619	0.916351
CHEK1	Cytosol	C2	0.00939576	0.00663573	0.97996	0.00400808	0.00285072	0.00180099	0.00208663	0.00265742	0.00148068	0.00163131	0.00157027	0.00195347	0.223319	0.681621	0.0409052	0.00897066	0.0251442	0.00130375	0.00270433
CHEK2	Nuclear	N4	0.0805459	0.847112	0.0540089	0.0183331	0.0169166	0.0103669	0.0259495	0.0273129	0.0180104	0.0187837	0.0081273	0.802191	0.0153765	0.0161999	0.00490397	0.00453942	0.0129891	0.00994928	0.00838381
CHERP	Nuclear	Unclassified	0.00429552	0.990156	0.00356979	0.0019789	0.00136189	0.000905388	0.00100326	0.00102498	0.0737384	0.784398	0.123644	0.00837565	0.000658579	0.000645664	0.00078961	0.000701197	0.000774738	0.00125538	0.000723526
CHFR	Nuclear	N4	0.0127605	0.84562	0.136637	0.00498167	0.00397382	0.00265046	0.00248686	0.00364936	0.0058479	0.00497116	0.00462444	0.830177	0.00799166	0.080028	0.00367151	0.00331256	0.0416337	0.00207423	0.00290744
CHID1	Nuclear	N4	0.0396614	0.935416	0.0113104	0.0136127	0.00287465	0.00275749	0.0249753	0.00905392	0.00634441	0.130247	0.012847	0.785977	0.00214286	0.00301323	0.001631	0.00164919	0.00287413	0.00830919	0.00530351
CHKA	Cytosol	Unclassified	0.003667	0.00428762	0.990387	0.00165836	0.00101638	0.00082065	0.000789678	0.0010403	0.00100454	0.000999306	0.00106193	0.00122184	0.118589	0.0583389	0.468337	0.0651231	0.279999	0.000726921	0.000931438
CHKB	Cytosol	Unclassified	0.00953436	0.00979939	0.975493	0.00517359	0.00225416	0.00175302	0.00209679	0.00343038	0.00192232	0.0023897	0.00315988	0.0023275	0.369483	0.50978	0.0285771	0.0101187	0.0575343	0.00133032	0.00384327
CHL1	Secretory	Unclassified	0.987215	0.00212229	0.00212912	0.00853347	0.523166	0.107666	0.0738924	0.28249	0.00050852	0.000610594	0.000584803	0.000418376	0.000409417	0.000429452	0.000450718	0.000417157	0.000422379	0.00804417	0.000489296
CHML	Cytosol	Unclassified	0.00361195	0.00429736	0.990535	0.00155614	0.00106466	0.000799564	0.000756818	0.000990913	0.00105609	0.00100255	0.00104581	0.00119292	0.0315335	0.0160227	0.391624	0.305112	0.246242	0.000688495	0.000867642
CHMP1B	Cytosol	Unclassified	0.0048035	0.00645506	0.986753	0.00198887	0.00145027	0.00110213	0.000978276	0.00127283	0.00137744	0.00135406	0.00148807	0.00223549	0.0242264	0.0196388	0.105256	0.151723	0.685909	0.000880354	0.00110851
CHMP2A	Cytosol	Unclassified	0.00567354	0.00766347	0.984199	0.0024644	0.0015852	0.00132403	0.00124033	0.00152399	0.00156599	0.00152582	0.00164742	0.00292424	0.0616675	0.109425	0.0924719	0.0420738	0.678561	0.00108977	0.00137464
CHMP2B	Cytosol	C4	0.00752237	0.00923482	0.98032	0.00292241	0.0024157	0.00173015	0.00146994	0.00190659	0.00223805	0.00201307	0.00232422	0.00265948	0.0249773	0.0193145	0.10147	0.735589	0.0989699	0.00121432	0.00170809
CHMP3	Cytosol	Unclassified	0.00656713	0.00806349	0.982608	0.00276131	0.00192024	0.00152584	0.00137562	0.00174543	0.00183089	0.00180092	0.00198127	0.00245041	0.0722589	0.0772691	0.452469	0.118864	0.261747	0.00119801	0.0015633
CHMP4B	Cytosol	Unclassified	0.00806174	0.0117559	0.977075	0.00310775	0.00262512	0.0018083	0.0015566	0.00207172	0.0024269	0.0021462	0.00250921	0.00467363	0.0211077	0.0305007	0.046551	0.267351	0.611565	0.0012617	0.00184605
CHMP4C	Cytosol	Unclassified	0.00357776	0.00461452	0.990272	0.00153534	0.00107163	0.000783588	0.000738192	0.000984355	0.00103162	0.0010165	0.00106302	0.00150338	0.0217727	0.0247952	0.207192	0.244664	0.491849	0.00067212	0.000863215
CHMP5	Cytosol	Unclassified	0.00676155	0.0100155	0.980619	0.00260388	0.00219214	0.00153416	0.00130874	0.0017265	0.00201719	0.00180432	0.0020987	0.00409524	0.01851	0.0240272	0.0379876	0.264991	0.635103	0.00107327	0.00153061
CHMP6	Secretory	Unclassified	0.974382	0.00780672	0.00833314	0.00947847	0.550436	0.0714646	0.202716	0.149765	0.00265773	0.00174885	0.00173669	0.00166345	0.00238865	0.00148017	0.00142628	0.00143977	0.00159828	0.00738015	0.00209832
CHMP7	Cytosol	Unclassified	0.0110462	0.0137704	0.970942	0.00424163	0.00364531	0.00245944	0.00208781	0.00285366	0.00339449	0.00292422	0.00343273	0.00401895	0.0398884	0.0234326	0.207577	0.636592	0.0634517	0.00169457	0.00254706
CHP1	Secretory	Unclassified	0.974223	0.00153155	0.00191598	0.0223295	0.108744	0.539885	0.228186	0.0974071	0.000322522	0.00051331	0.000399649	0.000296072	0.000316776	0.000383275	0.000418539	0.000417589	0.000379803	0.019233	0.00309653
CHPF	Secretory	Unclassified	0.966009	0.00355966	0.00398511	0.0264459	0.404394	0.26793	0.0847354	0.20895	0.000824174	0.000996112	0.000925218	0.00081416	0.000762472	0.00079109	0.000801791	0.000790731	0.000839023	0.0173527	0.00909321
CHPF2	Secretory	Unclassified	0.963939	0.00325965	0.00383686	0.0289649	0.496939	0.135022	0.0793247	0.252653	0.000674123	0.00100518	0.000809301	0.000771046	0.000706115	0.000771849	0.000795902	0.000765036	0.000797957	0.0209189	0.00804598
CHPT1	Secretory	Unclassified	0.93033	0.0049743	0.00341795	0.0612777	0.267114	0.135957	0.394927	0.132332	0.0013817	0.00158734	0.00125107	0.000754188	0.0006471	0.000673144	0.000720789	0.000693598	0.000683323	0.0591884	0.00208933
CHRAC1	Cytosol	C2	0.00594252	0.0136833	0.977454	0.00292062	0.00144726	0.00116945	0.00121027	0.00211553	0.0014962	0.00229927	0.002367	0.00752084	0.178362	0.647949	0.0214008	0.00953487	0.120206	0.00110662	0.001814
CHRNA5	Secretory	Unclassified	0.763247	0.0396135	0.0169632	0.180177	0.0163835	0.0255794	0.681352	0.0399315	0.00640498	0.0113555	0.00751838	0.0143347	0.00343635	0.00318568	0.00308896	0.00326345	0.00398871	0.156182	0.0239942
CHST10	Secretory	Unclassified	0.923419	0.0128667	0.0308603	0.0328545	0.478579	0.129906	0.181857	0.133077	0.00354276	0.00331195	0.00346049	0.00255154	0.0146648	0.00532059	0.00396933	0.00328389	0.00362167	0.0082417	0.0246128
CHST13	Secretory	S1	0.943643	0.0104298	0.0119274	0.0339994	0.605656	0.0563318	0.0318628	0.249793	0.00178433	0.00284399	0.00276556	0.00303587	0.0023145	0.00229677	0.00221351	0.00229164	0.00281103	0.0108867	0.0231127
CHST14	Secretory	Unclassified	0.979814	0.00198914	0.00268324	0.0155136	0.509874	0.168861	0.0594582	0.24162	0.000414931	0.000586364	0.000485152	0.000502694	0.000482504	0.000547549	0.000569545	0.000536244	0.0005474	0.0122661	0.00324751
CHST15	Secretory	Unclassified	0.763131	0.117874	0.0701343	0.0488608	0.44768	0.106446	0.057337	0.151667	0.0437834	0.0292258	0.0231577	0.0217075	0.016556	0.012797	0.00957607	0.0132018	0.0180034	0.0149413	0.0339196
CHST3	Secretory	Unclassified	0.98816	0.00160206	0.00208829	0.00815009	0.560136	0.097708	0.0610257	0.26929	0.000301532	0.000499139	0.000419647	0.000381742	0.000378486	0.000423503	0.000453223	0.000417774	0.000415303	0.00724769	0.000902396
CHSY1	Secretory	Unclassified	0.968616	0.00350781	0.00507712	0.0227987	0.421745	0.239629	0.166526	0.140717	0.000775922	0.00106586	0.000928724	0.000737298	0.00128397	0.000995135	0.000961531	0.000916487	0.000919995	0.0120802	0.0107185
CHSY3	Secretory	Unclassified	0.961996	0.00241619	0.003489	0.0320988	0.571805	0.11381	0.108488	0.167894	0.000460223	0.000802587	0.000593338	0.000560043	0.000680801	0.000708568	0.000715989	0.000695919	0.000687724	0.0193376	0.0127612
CHTF18	Nuclear	N4	0.0992469	0.85061	0.0316399	0.0185033	0.0112118	0.00943204	0.0328559	0.0457471	0.0181502	0.0615386	0.0117772	0.759144	0.00960373	0.00874492	0.00347721	0.00279319	0.00702087	0.0106987	0.00780465
CHTF8	Nuclear	N4	0.0125338	0.959453	0.0241918	0.00382131	0.00380444	0.00270758	0.00279984	0.00322196	0.00484134	0.00586147	0.00441046	0.94434	0.00300029	0.0117945	0.00211795	0.00229375	0.00498526	0.00152605	0.00229526
CHTOP	Nuclear	N3	0.0129931	0.979575	0.00425734	0.00317494	0.0027042	0.00408024	0.00155385	0.00465478	0.0728496	0.0900719	0.815491	0.00116176	0.000905188	0.000835334	0.000828278	0.000817284	0.000871257	0.0019342	0.00124074
CHUK	Cytosol	Unclassified	0.00391296	0.00449647	0.989903	0.00168794	0.00115633	0.000862689	0.000805807	0.00108813	0.00111095	0.00106715	0.00113772	0.00118065	0.141257	0.00949069	0.69119	0.131207	0.0167574	0.000714196	0.000973749
CIAPIN1	Cytosol	Unclassified	0.00382852	0.0050381	0.989502	0.00163181	0.00113387	0.000865609	0.000797405	0.00103163	0.00110232	0.0010742	0.00113845	0.00172313	0.019377	0.0243258	0.140593	0.291723	0.513483	0.000728589	0.000903217
CIB1	Secretory	Unclassified	0.985352	0.00219837	0.00265477	0.00979471	0.457866	0.19895	0.181971	0.146565	0.000582075	0.000602502	0.000562309	0.000451482	0.000585668	0.000504006	0.000525886	0.000522294	0.000516916	0.00873635	0.00105836
CIC	Nuclear	N4	0.00585516	0.974189	0.0179446	0.00201107	0.00171802	0.00124103	0.00111541	0.0017807	0.0018572	0.00328298	0.00201817	0.967031	0.00205057	0.0101216	0.00118964	0.00121878	0.00336401	0.000900864	0.0011102
CINP	Cytosol	C1	0.0155339	0.0204288	0.958398	0.00563977	0.00495724	0.00374837	0.00288607	0.00394218	0.00535204	0.00414478	0.00535206	0.00557987	0.863592	0.021234	0.0380781	0.0176206	0.0178729	0.00214954	0.00349023
CIP2A	Cytosol	Unclassified	0.00732894	0.00886186	0.980794	0.00301567	0.00231116	0.00154067	0.00142147	0.00205563	0.00220575	0.00190407	0.0022451	0.00250694	0.153499	0.0132759	0.620959	0.174963	0.0180968	0.00114051	0.00187516
CIR1	Nuclear	N4	0.0131034	0.974288	0.00750088	0.00510723	0.0016382	0.00138082	0.00591674	0.00416764	0.00552412	0.108354	0.0057502	0.85466	0.00130974	0.00219783	0.00111816	0.0011175	0.00175765	0.00300908	0.00209815
CIRBP	Nuclear	N1	0.00636537	0.989299	0.00330235	0.001033	0.00315986	0.000760694	0.00117566	0.00126916	0.975171	0.00798221	0.00398702	0.00215861	0.000683376	0.000587764	0.000690847	0.000684201	0.000656157	0.000564396	0.000468599
CISD1	Mitochondria	M2	0.0246947	0.00244406	0.00244537	0.970416	0.0046668	0.00285133	0.00147819	0.0156984	0.000536665	0.000683806	0.000781925	0.000441667	0.000421102	0.000471222	0.000527976	0.000504902	0.000520164	0.00637169	0.964044
CISD2	Secretory	Unclassified	0.973347	0.00229797	0.0021395	0.0222159	0.0335694	0.640178	0.246504	0.0530951	0.000476821	0.000810182	0.000642021	0.000368949	0.000348104	0.000416415	0.000458698	0.000488515	0.000427771	0.017336	0.00487984
CISD3	Mitochondria	M2	0.0620663	0.0420617	0.00482727	0.891045	0.00817159	0.00532707	0.00570336	0.0428643	0.00340018	0.00917877	0.0285152	0.000967582	0.000916989	0.000936915	0.000956703	0.000975103	0.00104156	0.0718193	0.819225
CIT	Mitochondria	Unclassified	0.0868301	0.064925	0.0449127	0.803332	0.00947038	0.0174884	0.0204783	0.0393931	0.00602174	0.0164542	0.0200333	0.0224157	0.00933591	0.0126379	0.00691275	0.0071695	0.00885663	0.623462	0.17987
CKAP2	Secretory	S3	0.926897	0.0335234	0.00506294	0.0345163	0.0823481	0.0613189	0.743498	0.039732	0.0127103	0.0126139	0.00582038	0.00237885	0.00118941	0.0009631	0.000962892	0.000942654	0.00100488	0.0324092	0.00210712
CKAP2L	Nuclear	N1	0.0135136	0.981978	0.00297111	0.00153686	0.0079721	0.00150145	0.00212431	0.00191579	0.967957	0.00467672	0.00859791	0.000746566	0.000629655	0.000542465	0.000644495	0.000596697	0.000557801	0.000921684	0.000615172
CKAP4	Secretory	Unclassified	0.974079	0.0035703	0.00396003	0.0183905	0.0430573	0.730631	0.111271	0.0891194	0.000979235	0.000949191	0.000790877	0.000850995	0.000818913	0.000809128	0.00077614	0.000749187	0.000806664	0.00601179	0.0123787
CKB	Cytosol	Unclassified	0.00485438	0.0068002	0.986345	0.00199997	0.00151357	0.00107972	0.000970159	0.00129092	0.00145573	0.00134174	0.00145375	0.00254898	0.0186311	0.0232476	0.0603503	0.359862	0.524255	0.000862403	0.00113757
CKM	Cytosol	Unclassified	0.0550375	0.070755	0.856776	0.0174314	0.0192766	0.013241	0.00969508	0.0128249	0.0176095	0.0129306	0.0192358	0.0209792	0.0369223	0.0249659	0.0764452	0.613572	0.104871	0.00615676	0.0112746
CKS1B	Cytosol	Unclassified	0.00859134	0.0123906	0.975835	0.00318295	0.00282414	0.00199493	0.00163905	0.00213322	0.00257305	0.00224795	0.00270584	0.00486376	0.0210927	0.0268822	0.0445386	0.310949	0.572372	0.00128069	0.00190226
CKS2	Cytosol	Unclassified	0.00437205	0.00522516	0.988494	0.00190904	0.00127831	0.000940964	0.000912725	0.00124005	0.00129954	0.00117901	0.00132266	0.00142394	0.112205	0.0217601	0.300101	0.0988553	0.455572	0.000794876	0.00111416
CLASP1	Cytosol	C1	0.00540651	0.00629896	0.985739	0.00255579	0.00151677	0.00119411	0.001157	0.00153864	0.00153782	0.00148947	0.00174321	0.00152847	0.75526	0.0481285	0.147796	0.0267761	0.00777778	0.000947728	0.00160806
CLASP2	Cytosol	C1	0.00512626	0.00599434	0.986544	0.00233555	0.00145294	0.00111936	0.00106486	0.0014891	0.00149198	0.00144861	0.00162301	0.00143075	0.713292	0.043903	0.192374	0.0303285	0.00664627	0.000900962	0.00143459
CLASRP	Nuclear	N4	0.00878062	0.974876	0.0133317	0.00301213	0.00275531	0.00197672	0.00169685	0.00235173	0.00285207	0.0123198	0.00379654	0.955907	0.00213972	0.00427342	0.00162091	0.00187946	0.00341819	0.00126377	0.00174837
CLC	Unclassified	Unclassified	0.268013	0.36602	0.295258	0.0707088	0.114	0.0580391	0.0366793	0.0592954	0.101654	0.0600607	0.111876	0.0924283	0.062917	0.0440893	0.0345858	0.0573671	0.0962988	0.0204423	0.0502665
CLCC1	Secretory	Unclassified	0.982237	0.00501432	0.00426062	0.00848851	0.0645619	0.716121	0.118975	0.082578	0.00158616	0.00151977	0.00091491	0.000993486	0.000944529	0.000882548	0.000795293	0.000771188	0.000867058	0.00555372	0.00293478
CLCN2	Secretory	Unclassified	0.982473	0.0040259	0.00411939	0.00938207	0.502682	0.141886	0.0613186	0.276586	0.000991193	0.00105578	0.00104078	0.000938154	0.000815275	0.00081376	0.000814296	0.000794562	0.000881497	0.00836147	0.0010206
CLCN3	Secretory	Unclassified	0.944396	0.0343399	0.0134639	0.00780022	0.595709	0.0746592	0.128602	0.145426	0.0252587	0.00307828	0.00336156	0.00264135	0.00485608	0.00204144	0.00197082	0.00210974	0.00248581	0.00549488	0.00230534
CLCN4	Cytosol	C1	0.0104672	0.00795827	0.977943	0.0036317	0.0034577	0.00225873	0.002101	0.00264979	0.0024589	0.00155464	0.00223826	0.00170647	0.756872	0.140401	0.0495397	0.0152499	0.0158795	0.0010943	0.0025374
CLCN6	Secretory	Unclassified	0.953689	0.0227495	0.0156427	0.00791905	0.593164	0.0675627	0.140767	0.152196	0.0142577	0.00297578	0.00330746	0.00220847	0.00684647	0.00219537	0.00207476	0.00207436	0.00245172	0.00521388	0.00270517
CLCN7	Secretory	Unclassified	0.969998	0.0115311	0.00949767	0.00897285	0.52782	0.072654	0.227351	0.142173	0.00481064	0.00243707	0.00247258	0.00181082	0.00298159	0.00160971	0.00154806	0.00156115	0.00179716	0.00668269	0.00229016
CLDN1	Secretory	S1	0.956952	0.0173942	0.0177608	0.00789343	0.619322	0.0993126	0.179515	0.0588024	0.0110448	0.00219032	0.00213908	0.00202004	0.0101549	0.0019693	0.0018464	0.00177223	0.00201796	0.00586548	0.00202795
CLDN12	Cytosol	Unclassified	0.00515846	0.00587856	0.986745	0.00221787	0.00141701	0.00110462	0.00102906	0.00160777	0.00145346	0.0014037	0.0015983	0.0014231	0.474472	0.417591	0.0380359	0.0107244	0.0459214	0.000837772	0.0013801
CLDN3	Secretory	Unclassified	0.975864	0.0112606	0.00621769	0.00665729	0.518635	0.118978	0.114974	0.223278	0.00444803	0.00249033	0.00279839	0.00152386	0.00143959	0.00116143	0.00110365	0.00117224	0.00134078	0.00552504	0.00113225
CLDND1	Secretory	Unclassified	0.981267	0.00621863	0.00607164	0.00644315	0.509908	0.092295	0.0913446	0.287719	0.00164726	0.00165369	0.00155631	0.00136137	0.00131249	0.0011569	0.00112776	0.00115242	0.00132207	0.00496618	0.00147697
CLEC16A	Cytosol	C1	0.00563444	0.00545099	0.986544	0.00237039	0.00174522	0.0012519	0.00117444	0.00146288	0.00143158	0.00123359	0.00149103	0.00129478	0.753281	0.156449	0.0530822	0.0134249	0.0103072	0.000853979	0.00151641
CLEC3B	Cytosol	Unclassified	0.0342968	0.0683117	0.885392	0.0119998	0.0111658	0.00826656	0.00658043	0.00828397	0.0102406	0.00859314	0.011093	0.038385	0.0382735	0.027703	0.0328271	0.0709378	0.71565	0.00460978	0.00739004
CLGN	Secretory	Unclassified	0.967048	0.0135593	0.0081314	0.011261	0.0584466	0.713463	0.106554	0.0885848	0.00407594	0.00524143	0.00212069	0.00212125	0.00188097	0.00162212	0.00143366	0.00148155	0.00171311	0.00545257	0.00580847
CLIC1	Cytosol	Unclassified	0.00333741	0.0049376	0.990287	0.00143783	0.000981592	0.000754685	0.000697616	0.000903515	0.000934002	0.000965929	0.00100732	0.00203034	0.0144978	0.0336063	0.0785634	0.164569	0.699051	0.000651886	0.000785942
CLIC2	Cytosol	C2	0.00603611	0.0757476	0.915654	0.00256264	0.00157149	0.00124125	0.00127134	0.00195203	0.00153259	0.00199319	0.00186372	0.0703581	0.0419139	0.655591	0.0177974	0.007829	0.192522	0.00109553	0.00146711
CLIC3	Cytosol	Unclassified	0.00316894	0.00353263	0.991808	0.00149023	0.000874557	0.000708451	0.000674429	0.000911499	0.000880794	0.00090591	0.000979292	0.000766636	0.596761	0.0393168	0.304797	0.0327445	0.0181895	0.000621575	0.000868658
CLIC4	Cytosol	Unclassified	0.00769107	0.0106879	0.978409	0.00321206	0.00224072	0.00183182	0.00162188	0.00199665	0.00209183	0.00210742	0.00238835	0.00410029	0.0322307	0.157937	0.135928	0.0997547	0.552559	0.00140544	0.00180663
CLINT1	Cytosol	C1	0.0941536	0.0735271	0.819646	0.0126732	0.0460807	0.0145704	0.0154972	0.0180053	0.0423104	0.00803876	0.00975257	0.0134254	0.679884	0.0677013	0.0237484	0.014894	0.0334182	0.00501122	0.00766194
CLIP1	Cytosol	Unclassified	0.00504335	0.00655887	0.986341	0.0020564	0.00159847	0.0011267	0.00100163	0.00131655	0.00150067	0.00138804	0.00150465	0.00216551	0.0216441	0.0180722	0.0660639	0.552283	0.328278	0.00088073	0.00117567
CLIP2	Cytosol	Unclassified	0.0052386	0.00685004	0.985749	0.0021622	0.00159304	0.00119183	0.0010607	0.00139302	0.00156929	0.00145762	0.0016058	0.00221732	0.0455147	0.0224646	0.183309	0.278764	0.455697	0.000932249	0.00122996
CLIP4	Secretory	Unclassified	0.623595	0.0735022	0.0365474	0.266355	0.0280661	0.0698625	0.431613	0.0940537	0.00561973	0.0352016	0.0155411	0.0171397	0.00982318	0.00992524	0.00523474	0.0045645	0.00699974	0.206025	0.0603296
CLK2	Nuclear	N2	0.00405406	0.988878	0.00437741	0.00269015	0.00100072	0.000888374	0.000864572	0.00130039	0.00476448	0.936387	0.0187225	0.0290046	0.00083596	0.000835827	0.000894504	0.000841931	0.000969186	0.00147817	0.00121197
CLK3	Nuclear	N4	0.00983311	0.942549	0.0446024	0.00301568	0.0024099	0.00178298	0.00167462	0.00396561	0.00294994	0.0097507	0.00385681	0.925991	0.00587771	0.0269626	0.00235382	0.00196557	0.00744271	0.00124788	0.0017678
CLMN	Unclassified	Unclassified	0.670323	0.273296	0.0120721	0.0443086	0.0522556	0.039744	0.553111	0.0252126	0.145812	0.0779562	0.0417985	0.00773014	0.00248745	0.0023594	0.0022535	0.00232275	0.00264905	0.0384361	0.00587249
CLMP	Secretory	Unclassified	0.971088	0.00845274	0.00855823	0.0119013	0.432809	0.11881	0.0395052	0.379964	0.00181584	0.00233445	0.00216963	0.00213282	0.00186316	0.00167785	0.00154762	0.00157165	0.00189795	0.00929827	0.00260305
CLN5	Nuclear	N4	0.0351546	0.908819	0.0449705	0.0110555	0.0105659	0.00728565	0.00823856	0.00906446	0.0150602	0.0128619	0.0104012	0.870496	0.00834086	0.0129034	0.00486468	0.00636468	0.0124968	0.0050724	0.00598307
CLNS1A	Cytosol	Unclassified	0.00592267	0.00947805	0.982227	0.00237257	0.00185904	0.00134571	0.0011789	0.00153903	0.0017723	0.00163181	0.00182675	0.00424719	0.0159922	0.0353841	0.0443886	0.271066	0.615396	0.00100541	0.00136715
CLOCK	Nuclear	N4	0.0210093	0.873869	0.0980806	0.00704097	0.00392964	0.00266474	0.00365849	0.0107564	0.00567961	0.0157952	0.00614471	0.84625	0.0140167	0.0660849	0.00412625	0.00235413	0.0114986	0.00287045	0.00417053
CLP1	Nuclear	N4	0.00758742	0.959245	0.0304287	0.00273918	0.00235787	0.00166838	0.00145241	0.00210876	0.00297442	0.00324217	0.00261333	0.950415	0.00293432	0.0195521	0.00173493	0.00173758	0.0044698	0.00120272	0.00153645
CLPB	Mitochondria	M1	0.173897	0.0406312	0.00643151	0.77904	0.00392314	0.00769386	0.148857	0.0134234	0.00250492	0.0197957	0.0137938	0.00453683	0.00123506	0.00132197	0.00130863	0.00125422	0.00131163	0.742867	0.0361725
CLPP	Mitochondria	Unclassified	0.0790052	0.274978	0.037553	0.608463	0.0104359	0.0139488	0.0382131	0.0164074	0.0115232	0.026684	0.0344625	0.202309	0.00778255	0.00707026	0.00574855	0.00681788	0.0101337	0.583236	0.0252276
CLPTM1	Secretory	S2	0.985914	0.00306765	0.00309792	0.00792023	0.0243492	0.743132	0.156634	0.0617985	0.000965055	0.000813643	0.00063518	0.000653768	0.000656241	0.000650356	0.000609291	0.000572975	0.000609062	0.00498746	0.00293277
CLPTM1L	Secretory	S2	0.985679	0.00253172	0.00277373	0.00901565	0.0106034	0.782199	0.15038	0.0424968	0.000761377	0.000644239	0.00058457	0.000541537	0.00049256	0.000573335	0.000575111	0.000561937	0.000570783	0.00478521	0.00423044
CLPX	Mitochondria	M1	0.0584779	0.0775667	0.0284443	0.835511	0.00764825	0.0114183	0.0250158	0.0143956	0.00755573	0.0129773	0.019964	0.0370696	0.00588324	0.00548902	0.0045428	0.00540205	0.00712718	0.800319	0.0351922
CLSPN	Nuclear	N4	0.0148788	0.946404	0.0338281	0.00488887	0.00486233	0.00338335	0.00267075	0.0039624	0.00395099	0.00871937	0.00570198	0.928032	0.0079001	0.0114192	0.00304287	0.00380735	0.00765849	0.00209005	0.00279882
CLSTN3	Secretory	Unclassified	0.959329	0.00454475	0.00419789	0.0319283	0.433068	0.0925937	0.267209	0.166459	0.00101582	0.00152307	0.00116899	0.000836874	0.000904446	0.000790469	0.000825714	0.000822663	0.000854598	0.0298519	0.00207638
CLTA	Cytosol	Unclassified	0.00440657	0.00473707	0.98892	0.00193661	0.00124401	0.000917969	0.000902279	0.00134231	0.00120683	0.00114283	0.00118217	0.00120524	0.405346	0.491345	0.0346197	0.00719765	0.0504107	0.000756784	0.00117983
CLTB	Cytosol	Unclassified	0.00585405	0.00622979	0.985536	0.00238048	0.00170903	0.00127083	0.00118348	0.0016907	0.00159721	0.00139663	0.00150084	0.00173511	0.399157	0.494588	0.0362732	0.00760199	0.0479157	0.000913049	0.00146743
CLTC	Cytosol	C2	0.00835992	0.00910595	0.979329	0.00320527	0.00248308	0.00166367	0.00164419	0.00256897	0.00234676	0.00191897	0.00196793	0.0028723	0.235649	0.628262	0.0284885	0.00671627	0.0802132	0.00117882	0.00202645
CLTCL1	Cytosol	Unclassified	0.0167773	0.0223834	0.954721	0.00611783	0.00504915	0.00343797	0.0032496	0.00504061	0.00450004	0.00362507	0.00392477	0.0103335	0.203334	0.60928	0.0323689	0.00907064	0.100668	0.00221905	0.00389879
CLU	Secretory	Unclassified	0.841469	0.0240789	0.0107522	0.1237	0.0420956	0.0604607	0.664082	0.0748301	0.00400368	0.0093297	0.00427704	0.00646846	0.00268927	0.00225238	0.00187505	0.00178787	0.0021476	0.115047	0.00865342
CLUH	Cytosol	Unclassified	0.00690451	0.0105303	0.979614	0.00295101	0.00194904	0.001605	0.00148284	0.00186763	0.00193733	0.00187634	0.00205109	0.00466558	0.0211363	0.0992411	0.0514989	0.0734204	0.734318	0.00129726	0.00165375
CMAS	Nuclear	N1	0.0239254	0.938496	0.0329625	0.00461577	0.00677025	0.00330609	0.00337325	0.0104758	0.875669	0.014657	0.00937469	0.0387959	0.0120169	0.00600195	0.00321662	0.00300575	0.00872124	0.00183683	0.00277893
CMBL	Cytosol	Unclassified	0.0236653	0.0299015	0.938773	0.0076601	0.00813449	0.00572286	0.00431204	0.00549593	0.00732683	0.00557581	0.00777107	0.00922782	0.0253411	0.0180489	0.051119	0.539288	0.304976	0.00277616	0.00488394
CMC1	Unclassified	Unclassified	0.214521	0.254593	0.129874	0.401013	0.0433616	0.0486081	0.0716065	0.0509449	0.0373811	0.0313629	0.0526535	0.133195	0.0265705	0.021339	0.0187526	0.0248656	0.0383458	0.3209	0.0801125
CMC2	Mitochondria	M2	0.0236069	0.0120133	0.00396676	0.960413	0.00594838	0.00176686	0.0048227	0.0110689	0.00103685	0.00390052	0.00613048	0.000945479	0.000671752	0.000783542	0.000790481	0.000819659	0.000901329	0.105466	0.854947
CMIP	Cytosol	C1	0.0063592	0.00750901	0.98334	0.00279177	0.00184716	0.00142802	0.00131217	0.00177184	0.00184105	0.00174572	0.00203539	0.00188685	0.730959	0.0747246	0.14334	0.02591	0.00840678	0.0010672	0.00172456
CMSS1	Nuclear	N1	0.264133	0.70492	0.019006	0.011941	0.12427	0.0174638	0.106525	0.0158744	0.665385	0.0102986	0.0227616	0.00647498	0.00387294	0.00321397	0.00336136	0.00375464	0.00480304	0.00729006	0.00465091
CMTM4	Secretory	Unclassified	0.829931	0.0164175	0.00951864	0.144133	0.0427636	0.0371429	0.691648	0.0583759	0.00260739	0.00630598	0.00297503	0.00452911	0.00203618	0.00197193	0.00180126	0.0017464	0.00196287	0.136116	0.00801732
CMTR1	Nuclear	N4	0.00631217	0.962659	0.0287963	0.00223267	0.00181764	0.00131716	0.00124477	0.0019326	0.00231993	0.0030151	0.00204577	0.955278	0.0028525	0.0195882	0.0014893	0.00139638	0.00346992	0.000994905	0.00123777
CMTR2	Cytosol	C2	0.0100692	0.0417026	0.943903	0.00432486	0.00252329	0.00201743	0.00205707	0.00347142	0.00283159	0.0037275	0.00351308	0.0316305	0.0901022	0.661455	0.0183487	0.00950155	0.164496	0.00162021	0.00270465
CNDP2	Cytosol	Unclassified	0.0046407	0.00703973	0.986392	0.00192736	0.00142555	0.00104806	0.000936544	0.00123056	0.00138126	0.00129895	0.00140168	0.00295784	0.0166394	0.0328789	0.053627	0.263308	0.619939	0.000843263	0.00108409
CNEP1R1	Secretory	Unclassified	0.655951	0.25935	0.028632	0.0560662	0.0324697	0.311282	0.251783	0.0604158	0.0997562	0.0394057	0.112972	0.00721635	0.00616937	0.00549899	0.00519357	0.00554378	0.00622629	0.0341143	0.0219519
CNKSR1	Cytosol	Unclassified	0.00434049	0.00498298	0.988806	0.00187024	0.00128973	0.000949917	0.000894778	0.00120606	0.00128719	0.00117316	0.001267	0.00125563	0.0671377	0.00977399	0.59805	0.249289	0.0645562	0.000799717	0.00107052
CNN2	Cytosol	Unclassified	0.00572715	0.00659844	0.985273	0.00240141	0.00170627	0.00130343	0.00118499	0.00153245	0.00163627	0.00155826	0.00169162	0.0017123	0.0779596	0.0165923	0.691275	0.152657	0.0467885	0.00103208	0.00136933
CNN3	Cytosol	Unclassified	0.00430624	0.00590227	0.988006	0.00178536	0.00131023	0.000973597	0.000879165	0.00114325	0.00123195	0.00121068	0.00129869	0.00216095	0.0325116	0.0178614	0.154528	0.125809	0.657296	0.000786884	0.000998477
CNNM2	Secretory	Unclassified	0.971655	0.00235747	0.00267147	0.0233163	0.236011	0.391858	0.18076	0.163026	0.000545575	0.000702826	0.000615759	0.000493306	0.000496431	0.00054052	0.00055865	0.000535909	0.000539962	0.0200234	0.0032929
CNNM3	Secretory	Unclassified	0.965432	0.00863227	0.00768822	0.0182474	0.535841	0.184406	0.0438099	0.201375	0.00274793	0.00220247	0.00187234	0.00180953	0.00167096	0.00150142	0.00140717	0.00142976	0.00167892	0.00837419	0.00987319
CNNM4	Secretory	Unclassified	0.969345	0.00398474	0.00454922	0.0221215	0.358192	0.324935	0.0735855	0.212632	0.00101889	0.0010664	0.000970206	0.000929239	0.000885008	0.000921951	0.000900873	0.000883582	0.000957806	0.0110213	0.0111002
CNOT1	Secretory	Unclassified	0.710078	0.194243	0.0635349	0.0321447	0.172319	0.0686203	0.389537	0.0796008	0.0986453	0.0211393	0.0109522	0.0635059	0.0282918	0.0100935	0.00719301	0.00721361	0.0107429	0.0213424	0.0108024
CNOT2	Nuclear	N4	0.0291233	0.922255	0.04146	0.00716217	0.00897552	0.00505301	0.0056442	0.00945055	0.0238242	0.015147	0.00646286	0.87682	0.0122131	0.0111267	0.00358835	0.00384459	0.0106873	0.00356422	0.00359795
CNOT3	Unclassified	Unclassified	0.0515623	0.552418	0.383277	0.0127432	0.0159592	0.00785649	0.00947172	0.0182749	0.0291774	0.0144016	0.00940816	0.499431	0.0957751	0.199141	0.0135098	0.00733627	0.0675145	0.004841	0.00790219
CNOT4	Cytosol	Unclassified	0.00449869	0.0070504	0.98657	0.00188069	0.00134013	0.0010294	0.000929909	0.00119925	0.00129027	0.00127671	0.00137457	0.00310885	0.0329339	0.0215038	0.0794646	0.113285	0.739383	0.000834882	0.00104581
CNOT6L	Cytosol	Unclassified	0.124308	0.135744	0.71782	0.022128	0.0467679	0.0187007	0.0216588	0.0371807	0.0405367	0.0154365	0.0132581	0.0665124	0.400111	0.189678	0.0284732	0.0145746	0.0849828	0.00825168	0.0138764
CNOT7	Nuclear	Unclassified	0.20863	0.636847	0.127329	0.0271933	0.0653609	0.0294771	0.0546482	0.0591443	0.166646	0.0446624	0.0170399	0.408498	0.0646336	0.0224578	0.00993459	0.00913881	0.0211645	0.0140017	0.0131916
CNOT8	Unclassified	Unclassified	0.311158	0.502823	0.145363	0.0406552	0.0889594	0.048383	0.100703	0.0731133	0.115551	0.0401714	0.0231373	0.323964	0.0614073	0.0260857	0.0143133	0.0145917	0.0289652	0.021884	0.0187712
CNOT9	Secretory	Unclassified	0.727429	0.18212	0.0590691	0.0313816	0.195214	0.0652618	0.380458	0.0864945	0.0950782	0.0221085	0.00959969	0.0553339	0.0291584	0.00899463	0.00612344	0.00579038	0.00900225	0.0214417	0.00993993
CNPY3	Nuclear	N4	0.0262908	0.812029	0.147935	0.0137452	0.00524109	0.00366942	0.00521685	0.0121635	0.00434992	0.0146785	0.00796777	0.785032	0.0228772	0.100898	0.00618896	0.0039514	0.0140199	0.0057222	0.00802299
CNPY4	Nuclear	N4	0.0338064	0.897997	0.0488925	0.0193044	0.00886609	0.0060185	0.00877129	0.0101505	0.00832642	0.0157361	0.0119901	0.861944	0.00674924	0.0218562	0.00453982	0.00550056	0.0102467	0.0103056	0.00899876
CNR1	Secretory	Unclassified	0.63163	0.204269	0.126968	0.0371335	0.481292	0.0512394	0.034964	0.0641342	0.0809967	0.0299214	0.0504815	0.0428692	0.0257646	0.0194808	0.0176501	0.024729	0.0393435	0.0133338	0.0237997
CNRIP1	Cytosol	C2	0.00945668	0.026525	0.960049	0.00396959	0.0027431	0.00196954	0.00187442	0.00286962	0.003277	0.00312358	0.00357555	0.0165489	0.105159	0.711176	0.0181763	0.00993073	0.115607	0.00158793	0.00238165
CNST	Secretory	Unclassified	0.982125	0.00181706	0.00233754	0.01372	0.203591	0.500702	0.16553	0.112303	0.000424105	0.00053753	0.000473193	0.000382233	0.000430886	0.000457963	0.000487605	0.000493863	0.000467224	0.0110874	0.00263265
CNTLN	Cytosol	C1	0.0301238	0.0247206	0.938976	0.00617922	0.0131798	0.00538106	0.00522498	0.00633794	0.0116493	0.00353267	0.00500133	0.00453732	0.808482	0.0583802	0.035142	0.0129998	0.0239729	0.00209228	0.00408694
CNTNAP1	Secretory	Unclassified	0.967476	0.00217911	0.00255583	0.027789	0.0889842	0.562617	0.205679	0.110195	0.000463752	0.000672866	0.000560507	0.000481983	0.00046439	0.000512962	0.00053884	0.000525021	0.00051462	0.0221972	0.00559178
CNTNAP4	Nuclear	N1	0.0123236	0.98259	0.00363616	0.00145048	0.00898484	0.00132675	0.000935909	0.00107611	0.96691	0.00238248	0.0123296	0.00096762	0.000640277	0.000680503	0.000766742	0.000749535	0.000799105	0.000798757	0.000651722
CNTRL	Cytosol	Unclassified	0.0249073	0.0282259	0.936612	0.0102546	0.00799345	0.00588914	0.00487965	0.00614504	0.00619298	0.00578013	0.00782371	0.00842913	0.202052	0.584094	0.0615214	0.0533174	0.0356274	0.00379998	0.00645461
CNTROB	Unclassified	Unclassified	0.197703	0.182498	0.312209	0.30759	0.0333967	0.0475977	0.0470124	0.0696958	0.0177354	0.0382286	0.071979	0.0545554	0.0664666	0.135859	0.0340656	0.0336778	0.0421399	0.112765	0.194825
COA1	Mitochondria	M2	0.053269	0.00794879	0.00658279	0.932199	0.0115509	0.0127909	0.00707347	0.0218537	0.0018299	0.00236994	0.00217352	0.00157543	0.0014615	0.00133029	0.00121588	0.00115883	0.00141629	0.00749073	0.924709
COA3	Mitochondria	M2	0.0447329	0.019277	0.0149534	0.921037	0.0138141	0.00756171	0.00689507	0.0164621	0.00476492	0.00489723	0.00527335	0.00434153	0.00330579	0.0027949	0.00253402	0.00272068	0.00359801	0.0104562	0.91058
COA5	Nuclear	N4	0.0103457	0.970473	0.0155484	0.0036326	0.00179817	0.00141528	0.00233443	0.00479781	0.00229542	0.0125031	0.00303	0.952645	0.00221415	0.00803208	0.00136163	0.00122718	0.00271333	0.00175992	0.00187269
COA6	Nuclear	Unclassified	0.120798	0.700807	0.112308	0.0660869	0.0322019	0.0248046	0.0350639	0.0287273	0.038807	0.0499902	0.0442359	0.567774	0.0226331	0.0190544	0.0141404	0.018875	0.0376053	0.0449831	0.0211038
COA7	Nuclear	Unclassified	0.0659521	0.662168	0.0429796	0.2289	0.0118433	0.0127198	0.027205	0.0141839	0.0134308	0.0555141	0.0403316	0.552892	0.00865864	0.00771118	0.00629582	0.00725339	0.0130605	0.2124	0.0164999
COASY	Cytosol	C2	0.00475534	0.00724979	0.98548	0.0025148	0.00122684	0.000994698	0.000995188	0.00153862	0.000891663	0.0014899	0.0013706	0.00349763	0.192137	0.716303	0.0310221	0.00689305	0.0391249	0.00101766	0.00149715
COBLL1	Cytosol	C2	0.00633203	0.0113461	0.979611	0.00271062	0.0017939	0.00145296	0.00135727	0.0017279	0.00187445	0.00189575	0.00196551	0.00561037	0.0313554	0.815685	0.0188575	0.00530182	0.108412	0.00117873	0.00153188
COCH	Nuclear	N4	0.146086	0.715638	0.107714	0.0305625	0.0204273	0.0126337	0.0533325	0.0596922	0.018606	0.0392048	0.0139924	0.643835	0.0319078	0.0409832	0.006903	0.0055507	0.0223689	0.0157205	0.0148421
COG1	Cytosol	Unclassified	0.0118214	0.0106252	0.973088	0.00446506	0.00396832	0.00259646	0.00240568	0.00285095	0.00257588	0.00234355	0.00274481	0.00296094	0.544143	0.345241	0.0502589	0.0140677	0.0193778	0.00157635	0.00288871
COG2	Cytosol	Unclassified	0.0267875	0.0231906	0.941994	0.00802801	0.00976306	0.00600397	0.00524815	0.00577235	0.00601278	0.00452269	0.00582372	0.0068314	0.525659	0.315601	0.0498028	0.0151272	0.0358042	0.00277089	0.00525711
COG3	Cytosol	Unclassified	0.0119881	0.0103603	0.973296	0.00435521	0.00405298	0.00252553	0.00242283	0.00298673	0.00264693	0.00224493	0.00262473	0.00284369	0.572528	0.3192	0.0455071	0.0132757	0.0227859	0.00151801	0.0028372
COG4	Cytosol	Unclassified	0.00848667	0.00682964	0.981229	0.00345473	0.00273031	0.00179336	0.00182686	0.00213614	0.00172536	0.00154543	0.00179943	0.00175942	0.561365	0.342882	0.0483491	0.0123011	0.0163313	0.00113883	0.0023159
COG5	Cytosol	C1	0.00545673	0.00492544	0.98724	0.00237768	0.00166019	0.00116675	0.00116261	0.00146719	0.00124602	0.00118776	0.00133714	0.00115452	0.673887	0.234001	0.0563486	0.013975	0.00902874	0.000852469	0.00152521
COG6	Cytosol	Unclassified	0.00454836	0.00513323	0.988235	0.00208313	0.00130964	0.00104969	0.000932064	0.00125697	0.00114988	0.00127669	0.00135551	0.00135114	0.628161	0.281451	0.0537981	0.0102076	0.0146178	0.000876643	0.00120649
COG7	Cytosol	C1	0.00345572	0.00378249	0.991093	0.00166837	0.000955895	0.000783897	0.000728993	0.000986931	0.000873175	0.000961639	0.0010409	0.000906783	0.734858	0.162108	0.0734584	0.0133392	0.0073298	0.000672975	0.000995392
COIL	Nuclear	Unclassified	0.00229292	0.992991	0.00299683	0.00171881	0.000660492	0.000477879	0.000432459	0.000722091	0.00963046	0.726215	0.254526	0.00262015	0.000535105	0.000561473	0.00067032	0.000595243	0.000634686	0.00109956	0.000619251
COL12A1	Nuclear	N4	0.213664	0.717343	0.0244125	0.0445803	0.0151322	0.0121654	0.142077	0.0442899	0.0197061	0.106591	0.0194365	0.57161	0.00615241	0.00640444	0.00315358	0.00298298	0.0057191	0.0307477	0.0138326
COL14A1	Secretory	Unclassified	0.729002	0.214196	0.027107	0.0296956	0.0461581	0.0414826	0.594987	0.0463734	0.0565859	0.0241149	0.0077905	0.125704	0.00764893	0.00519826	0.00411467	0.00425851	0.00588665	0.0227189	0.00697671
COL15A1	Secretory	S3	0.927239	0.0159491	0.00816949	0.0486421	0.0576935	0.0583764	0.748761	0.0624086	0.00388811	0.00488156	0.00186316	0.00531625	0.00212674	0.0016637	0.00142593	0.00136783	0.00158529	0.046528	0.00211411
COL1A1	Cytosol	C2	0.0242224	0.0183315	0.947104	0.0103419	0.00592709	0.0042274	0.00526022	0.0088077	0.00344739	0.0043412	0.00455749	0.00598542	0.197893	0.654296	0.031409	0.00952134	0.0539858	0.00270358	0.00763829
COL1A2	Cytosol	Unclassified	0.0125648	0.011222	0.971322	0.00489152	0.00418046	0.00267356	0.00262134	0.00308946	0.00278585	0.00249258	0.00295789	0.00298569	0.58017	0.307752	0.0506537	0.0156771	0.0170687	0.00163635	0.00325517
COL25A1	Secretory	Unclassified	0.970301	0.00673094	0.00617893	0.0167893	0.24848	0.241459	0.414191	0.0661704	0.0024035	0.00163335	0.00158051	0.0011136	0.00153679	0.00114562	0.00113394	0.00115532	0.00120725	0.0152162	0.00157313
COL3A1	Nuclear	N4	0.0245832	0.946792	0.0180757	0.0105493	0.0038134	0.0027834	0.0121867	0.00579972	0.00480168	0.0279391	0.00750466	0.906546	0.0027672	0.006108	0.00216797	0.00252977	0.00450276	0.00589617	0.00465311
COL4A1	Secretory	S3	0.920642	0.0275775	0.00411012	0.0476707	0.0308461	0.0418449	0.822269	0.0256816	0.00804736	0.0121254	0.00536545	0.00203929	0.000806675	0.000817757	0.000837462	0.000816529	0.000831694	0.0458254	0.00184527
COL4A2	Secretory	S3	0.923769	0.0345794	0.00626258	0.0353887	0.0140301	0.0197028	0.866834	0.0232025	0.0084296	0.0140777	0.00395559	0.00811651	0.00130988	0.00125331	0.00121816	0.00119281	0.00128842	0.0325242	0.00286441
COL4A3	Secretory	Unclassified	0.661306	0.078109	0.0295167	0.231069	0.0417579	0.0787349	0.417262	0.123551	0.00770065	0.0256279	0.0170684	0.0277121	0.00870792	0.00661503	0.00431995	0.00385143	0.00602239	0.17358	0.0574884
COL4A3BP	Cytosol	Unclassified	0.00553177	0.00641518	0.985745	0.00230815	0.00165864	0.00122492	0.00111433	0.00153388	0.00160068	0.00149668	0.00162914	0.00168868	0.252439	0.0243381	0.622166	0.0766782	0.0101239	0.000958065	0.00135009
COL4A6	Secretory	Unclassified	0.855519	0.0665522	0.020588	0.0573412	0.0592713	0.0557642	0.658656	0.081827	0.0130288	0.0134376	0.00495216	0.0351336	0.0064899	0.00427683	0.00300435	0.00283698	0.00397999	0.050446	0.00689521
COL5A1	Secretory	Unclassified	0.606194	0.326652	0.0304276	0.0367261	0.100971	0.0525504	0.388751	0.0639214	0.154722	0.0939584	0.0246278	0.0533439	0.0106138	0.00550797	0.00432226	0.00422737	0.0057563	0.0266647	0.0100615
COL7A1	Secretory	Unclassified	0.845484	0.0863682	0.021242	0.0469053	0.0919624	0.075367	0.594583	0.0835721	0.0250716	0.0302044	0.00991103	0.0211813	0.00802966	0.00396394	0.00283857	0.00264692	0.00376287	0.0395254	0.00737995
COL8A1	Secretory	Unclassified	0.920447	0.00670138	0.00292498	0.0699264	0.102376	0.171892	0.580558	0.0656206	0.00111423	0.00304703	0.00188539	0.000654736	0.000616699	0.000560702	0.0005821	0.000579809	0.000585668	0.0682957	0.00163071
COLGALT1	Secretory	S3	0.83665	0.106659	0.0112725	0.0454184	0.0156858	0.02231	0.771417	0.0272377	0.0212887	0.0336787	0.00801001	0.0436817	0.00239598	0.0022465	0.00206848	0.00209978	0.00246174	0.0396187	0.00579971
COLGALT2	Secretory	S3	0.938886	0.0186749	0.00577273	0.0366663	0.0132469	0.0397667	0.860454	0.0254179	0.00441047	0.00647548	0.00251431	0.00527469	0.00117224	0.00111835	0.00113006	0.00111874	0.00123333	0.0341597	0.00250659
COMMD2	Cytosol	Unclassified	0.00316242	0.00371341	0.991574	0.0015501	0.000819271	0.000655866	0.000687869	0.000999419	0.00082573	0.00090465	0.000972214	0.00101081	0.499657	0.276373	0.111246	0.0183732	0.0859248	0.00062163	0.000928468
COMMD4	Cytosol	Unclassified	0.00340919	0.00383053	0.991147	0.00161368	0.000949535	0.000766598	0.000721944	0.000971117	0.000868179	0.00100367	0.0010302	0.000928472	0.601363	0.191857	0.155037	0.0136313	0.0292583	0.000698977	0.000914702
COMMD5	Cytosol	Unclassified	0.00536333	0.0062297	0.985957	0.00245044	0.00149	0.0011553	0.00112928	0.00158875	0.00150694	0.00145265	0.0016146	0.0016555	0.487427	0.0868556	0.27916	0.033078	0.0994353	0.000991242	0.0014592
COMMD8	Cytosol	Unclassified	0.00283861	0.00314655	0.992654	0.00136048	0.000767519	0.000620935	0.000617828	0.000832327	0.000755452	0.00080701	0.000832405	0.000751687	0.442692	0.141914	0.299077	0.0285408	0.0804306	0.000586093	0.000774391
COMT	Secretory	Unclassified	0.979384	0.00234852	0.00236422	0.0159034	0.0402369	0.631708	0.25696	0.0504787	0.000531205	0.000801853	0.000612272	0.000403192	0.000406368	0.000459498	0.00049824	0.000528542	0.000471567	0.0125754	0.00332795
COMTD1	Mitochondria	M2	0.0710983	0.00110415	0.0019098	0.925888	0.0362827	0.00642073	0.00374539	0.0246494	0.000241264	0.00034797	0.000234083	0.000280833	0.000329135	0.000378418	0.000408942	0.000406153	0.00038715	0.0151989	0.910689
COP1	Nuclear	N4	0.0254552	0.939745	0.0268995	0.00790024	0.00712419	0.00546558	0.00653683	0.00632863	0.216257	0.0629981	0.012358	0.648132	0.00493419	0.00446375	0.0042083	0.0050676	0.00822563	0.00319878	0.00470146
COPA	Cytosol	Unclassified	0.183733	0.0497837	0.748152	0.0183313	0.0880133	0.0243398	0.0371175	0.0342628	0.0249471	0.00736458	0.00860672	0.00886534	0.624877	0.0628662	0.0238681	0.0126389	0.0239015	0.00658414	0.0117471
COPB1	Cytosol	Unclassified	0.0443818	0.0236073	0.921667	0.0103437	0.0182483	0.00805067	0.00827214	0.00981068	0.00765466	0.00427139	0.00497741	0.00670386	0.511906	0.30725	0.0471595	0.0134402	0.0419111	0.00316131	0.00718235
COPB2	Cytosol	Unclassified	0.0201645	0.0203101	0.95334	0.00618567	0.00668001	0.00403421	0.00374308	0.00570715	0.00534863	0.00358249	0.00382816	0.00755087	0.326443	0.518423	0.03672	0.00978793	0.0619661	0.00219401	0.00399166
COPE	Cytosol	C1	0.125738	0.0493592	0.810072	0.0148301	0.0602849	0.0184164	0.0229913	0.0240456	0.0251294	0.00673881	0.00815063	0.00934032	0.664084	0.0779681	0.0270189	0.0135028	0.027499	0.00529547	0.00953465
COPG2	Unclassified	Unclassified	0.224708	0.074469	0.674896	0.0259274	0.102427	0.0300352	0.0460955	0.0461497	0.0328821	0.0113582	0.0114037	0.018825	0.468809	0.117811	0.0290619	0.0147845	0.044429	0.00952551	0.0164019
COPRS	Cytosol	Unclassified	0.0382364	0.17409	0.774071	0.0136034	0.0119152	0.00897861	0.00748028	0.00986235	0.0118451	0.010184	0.0122432	0.139817	0.0188586	0.10763	0.0164028	0.0300999	0.60108	0.00517306	0.00843037
COPS2	Cytosol	C2	0.00722274	0.0232645	0.966669	0.00284375	0.00210917	0.00169614	0.00151021	0.00190721	0.00239142	0.00219919	0.00231592	0.0163579	0.0196306	0.807009	0.0121122	0.00601085	0.121906	0.00121856	0.0016252
COPS3	Cytosol	C2	0.00824479	0.0139881	0.974443	0.00332396	0.00233667	0.00188276	0.00169763	0.00232772	0.0028456	0.00256615	0.00259933	0.00597701	0.0520067	0.820116	0.0192228	0.00592789	0.0771702	0.00142565	0.00189831
COPS4	Cytosol	C2	0.00580711	0.0130861	0.978669	0.00243826	0.001638	0.00132864	0.00123411	0.00160637	0.00192574	0.00186559	0.00190377	0.007391	0.0255244	0.782132	0.0126151	0.00628725	0.152109	0.00106158	0.00137669
COPS5	Cytosol	C2	0.0182492	0.0309995	0.944154	0.00659768	0.00563034	0.00449788	0.00363697	0.00448405	0.00569529	0.00534569	0.00623307	0.0137255	0.039187	0.801604	0.0185541	0.00982756	0.0749812	0.00270984	0.00388784
COPS6	Cytosol	C2	0.0131884	0.0216788	0.960325	0.00480759	0.00384398	0.00271185	0.00254678	0.00408578	0.00478143	0.00342559	0.00355309	0.00991865	0.169472	0.644116	0.0254465	0.00813008	0.11316	0.00180571	0.00300188
COPS7A	Cytosol	C2	0.0141831	0.0371898	0.943554	0.00507281	0.00410235	0.00317525	0.00278443	0.0041211	0.00548436	0.00432223	0.0042391	0.0231441	0.0625086	0.770173	0.0207321	0.00778693	0.0823538	0.00207751	0.0029953
COPS7B	Cytosol	C2	0.0112488	0.0169616	0.967278	0.00451116	0.00329259	0.00273268	0.00235268	0.00287084	0.00346819	0.00347353	0.00382486	0.00619502	0.0447046	0.820639	0.0179937	0.007596	0.0763454	0.00194413	0.00256703
COPS8	Cytosol	C2	0.0100611	0.0182747	0.967776	0.00388783	0.00285717	0.00225083	0.002005	0.00294814	0.00365352	0.00315059	0.00322471	0.0082459	0.0934095	0.752832	0.0224159	0.00775985	0.091359	0.00160041	0.00228741
COPS9	Nuclear	N1	0.0628741	0.886436	0.0421988	0.00849162	0.0326587	0.00788867	0.00808079	0.014246	0.858478	0.00746356	0.014394	0.00610028	0.0214189	0.00483391	0.00441099	0.00442271	0.0071122	0.00354308	0.00494853
COPZ1	Cytosol	C2	0.00431056	0.00485504	0.988809	0.00202505	0.00119949	0.000955929	0.000934456	0.00122068	0.00107116	0.00121921	0.00120138	0.00136329	0.206848	0.687231	0.0346225	0.0056745	0.0544332	0.000842041	0.00118301
COPZ2	Cytosol	Unclassified	0.00366786	0.00414731	0.990512	0.00167312	0.00101202	0.000795835	0.000782086	0.00107792	0.00107113	0.000984523	0.00108228	0.00100937	0.285907	0.0166809	0.568159	0.0681653	0.0516001	0.000693898	0.000979227
COQ10A	Unclassified	Unclassified	0.179967	0.488826	0.179992	0.151216	0.060478	0.0365431	0.0373806	0.0455649	0.0488054	0.113082	0.139302	0.187637	0.0344017	0.0382973	0.0224064	0.0299535	0.0549329	0.0829181	0.0682975
COQ10B	Mitochondria	Unclassified	0.321146	0.0393183	0.00688058	0.632655	0.0108996	0.0214915	0.262252	0.0265026	0.00300033	0.0197043	0.0128889	0.00372483	0.00138612	0.00138688	0.00139613	0.0013284	0.00138306	0.612033	0.0206227
COQ2	Mitochondria	M2	0.120476	0.0636883	0.047318	0.768518	0.0288107	0.0287159	0.0156161	0.0473333	0.0162828	0.0120027	0.0211278	0.014275	0.0104328	0.00822954	0.00686272	0.00904469	0.0127483	0.0106699	0.757848
COQ3	Secretory	S3	0.948651	0.0245402	0.00756371	0.0192453	0.0158356	0.0480588	0.859107	0.0256493	0.00893801	0.00761215	0.00495158	0.00303844	0.00173832	0.00142465	0.00140487	0.00139096	0.00160491	0.0155809	0.00366441
COQ4	Secretory	Unclassified	0.943727	0.00400074	0.00329526	0.0489774	0.0612158	0.506893	0.296682	0.0789359	0.000590406	0.00174705	0.00112778	0.000535498	0.000705942	0.00065044	0.000644215	0.000673268	0.000621393	0.0355953	0.0133821
COQ5	Secretory	Unclassified	0.817968	0.0131277	0.00432139	0.164583	0.0222029	0.128458	0.621995	0.045313	0.00234665	0.00536368	0.00436778	0.00104957	0.000823425	0.000850009	0.000891207	0.000884052	0.000872695	0.153596	0.0109863
COQ8A	Mitochondria	M2	0.0260758	0.00392764	0.00236805	0.967629	0.00437509	0.00228985	0.00776361	0.0116472	0.000451598	0.00141193	0.00165339	0.000410727	0.000396379	0.000463306	0.000508596	0.000501429	0.00049834	0.208868	0.758761
COQ8B	Mitochondria	M2	0.0507408	0.00232786	0.00237539	0.944556	0.0157583	0.00616781	0.00638507	0.0224296	0.000520316	0.00072207	0.000659669	0.000425805	0.000420781	0.000444945	0.000498867	0.000503673	0.000507122	0.0215495	0.923006
COQ9	Mitochondria	M1	0.0399571	0.0314343	0.00601488	0.922594	0.00151282	0.003651	0.028354	0.00643931	0.0012875	0.0111028	0.0135766	0.00546747	0.00115344	0.00127502	0.00122318	0.00117095	0.00119229	0.880014	0.0425801
CORO1B	Cytosol	C5	0.0158573	0.0797346	0.898291	0.00611746	0.00477231	0.00379332	0.00327669	0.00401503	0.00449175	0.00417817	0.00480872	0.066256	0.0267225	0.0670621	0.0205949	0.0323561	0.751555	0.00257152	0.00354594
CORO2A	Secretory	S3	0.948205	0.0197412	0.00355946	0.0284941	0.0396873	0.0422423	0.840477	0.0257984	0.00759137	0.00722494	0.0031686	0.00175624	0.000716805	0.000701442	0.000728071	0.000700218	0.000712925	0.0272422	0.0012519
CORO2B	Unclassified	Unclassified	0.276147	0.0645207	0.625344	0.0339878	0.0979844	0.0432726	0.0642999	0.0705903	0.0259225	0.0124678	0.0146922	0.0114381	0.477771	0.0755949	0.0272536	0.0145642	0.030161	0.00888064	0.0251072
COTL1	Cytosol	Unclassified	0.0148496	0.0187085	0.961443	0.00499918	0.00508806	0.00352199	0.00273416	0.00350542	0.00450584	0.00357092	0.00480924	0.00582247	0.0209048	0.0176965	0.0556797	0.616528	0.250633	0.00187499	0.0031242
COX10	Mitochondria	M2	0.0142423	0.00393872	0.00291473	0.978904	0.00333532	0.00195608	0.000955601	0.00799525	0.000751272	0.00132654	0.00134488	0.000516024	0.000562962	0.000591415	0.000598235	0.000545757	0.000616363	0.0166158	0.962289
COX11	Mitochondria	M2	0.0361568	0.0260452	0.0140372	0.923761	0.00961067	0.00459062	0.00419664	0.0177589	0.00397352	0.00684904	0.0117545	0.00346819	0.00259243	0.0025112	0.0024935	0.00276786	0.0036722	0.0701312	0.85363
COX15	Mitochondria	M2	0.0185772	0.00300773	0.00344285	0.974972	0.00388189	0.00370044	0.00138913	0.00960579	0.000652173	0.000773921	0.000831329	0.000750304	0.000675094	0.000684428	0.000701594	0.000639859	0.000741875	0.00437737	0.970595
COX17	Nuclear	Unclassified	0.0492491	0.659973	0.0248133	0.265964	0.00615489	0.00820113	0.00973311	0.02516	0.0105475	0.142397	0.497985	0.0090437	0.00497168	0.00518258	0.00426147	0.00489431	0.0055033	0.16316	0.102804
COX18	Mitochondria	M2	0.168662	0.00808867	0.00677542	0.816473	0.0245282	0.0493174	0.0269472	0.0678697	0.00199398	0.00252896	0.00195956	0.00160618	0.00157565	0.00139866	0.00121857	0.00116725	0.00141528	0.00787996	0.808593
COX19	Mitochondria	M1	0.0448138	0.0751605	0.0189408	0.861085	0.00476194	0.00998037	0.016678	0.0133935	0.00453696	0.0227002	0.025708	0.0222153	0.00389299	0.00393588	0.00335601	0.00350931	0.00424661	0.812458	0.048627
COX20	Mitochondria	M2	0.0201704	0.0012888	0.00181827	0.976723	0.00755648	0.00151085	0.000738149	0.0103649	0.000286637	0.000378993	0.000303685	0.000319484	0.0003156	0.000352355	0.000395	0.000376541	0.000378771	0.00525207	0.97147
COX4I1	Mitochondria	M2	0.0603173	0.00320434	0.00174895	0.934729	0.012031	0.00801674	0.00869531	0.0315743	0.000496792	0.00129533	0.00113775	0.000274465	0.000310185	0.000333258	0.000367992	0.0003814	0.000356117	0.0633821	0.871347
COX5A	Mitochondria	M2	0.0251001	0.00321791	0.00248711	0.969195	0.00298745	0.00344209	0.00128449	0.0173861	0.000687782	0.000915462	0.0011434	0.000471264	0.000470896	0.000504518	0.000527057	0.000469385	0.000515259	0.00471935	0.964476
COX5B	Mitochondria	M2	0.010988	0.00148878	0.00171374	0.985809	0.00259093	0.000966079	0.000630246	0.00680078	0.000315311	0.000449803	0.000445863	0.000277804	0.000271487	0.000326247	0.000385786	0.00036358	0.00036664	0.00568155	0.980128
COX6A1	Unclassified	M2	0.301267	0.0612864	0.0305607	0.606886	0.0407319	0.112584	0.0933815	0.0545698	0.0101607	0.010987	0.0350263	0.00511244	0.00745953	0.00659704	0.00593355	0.00525299	0.00531763	0.0162984	0.590588
COX6B1	Mitochondria	Unclassified	0.10433	0.159389	0.00719075	0.729091	0.0212305	0.008483	0.0480372	0.0265789	0.00468507	0.0650668	0.0870172	0.00261953	0.00133762	0.00141427	0.00147911	0.00146224	0.00149751	0.479871	0.24922
COX6C	Mitochondria	M2	0.0225495	0.00786496	0.00549231	0.964093	0.00483801	0.00445403	0.00283985	0.0104176	0.00161366	0.00245284	0.00253802	0.00126044	0.00124102	0.00114725	0.00101538	0.000942301	0.00114636	0.0118305	0.952263
COX7A2	Mitochondria	M2	0.0447084	0.00696707	0.0057585	0.942566	0.00687574	0.0143576	0.00740116	0.0160739	0.00170055	0.00205953	0.0017183	0.00148868	0.00131384	0.00119774	0.00105462	0.000989842	0.00120246	0.00574959	0.936816
COX7B	Mitochondria	M2	0.0370241	0.0213462	0.0173328	0.924297	0.0111932	0.00735232	0.00574245	0.0127362	0.00488392	0.0049901	0.0065187	0.00495348	0.00381564	0.00318902	0.00289178	0.00316217	0.00427414	0.0171856	0.907111
COX7C	Mitochondria	M2	0.328481	0.0730697	0.0541845	0.544264	0.0624124	0.181314	0.0203897	0.0643651	0.0190078	0.0175891	0.0201849	0.0162879	0.0118613	0.00950992	0.0081197	0.0104974	0.0141962	0.0109775	0.533287
CP	Cytosol	C1	0.0119742	0.0152757	0.967649	0.0051006	0.00336824	0.00247665	0.00236362	0.00376572	0.00396482	0.0032131	0.00405065	0.00404715	0.648475	0.10698	0.0677789	0.0401937	0.104223	0.00190604	0.00319456
CPA4	Nuclear	N4	0.0170738	0.9445	0.0325753	0.00585095	0.00313713	0.00218131	0.00401833	0.00773703	0.0037834	0.0118314	0.00415081	0.924734	0.00457866	0.0184893	0.0021302	0.00189515	0.00548197	0.00268943	0.00316152
CPD	Secretory	Unclassified	0.985166	0.00226283	0.00209804	0.0104733	0.521161	0.131939	0.0782849	0.25378	0.000614148	0.000638478	0.000608789	0.000401412	0.00040684	0.000423371	0.000445778	0.000410049	0.000412	0.0100655	0.000407846
CPEB2	Cytosol	C2	0.0104149	0.0431827	0.942308	0.0040947	0.00270872	0.00206159	0.00212964	0.00351491	0.00326681	0.0034729	0.00315603	0.033287	0.0499963	0.693985	0.016716	0.00822379	0.173386	0.00156031	0.00253439
CPEB4	Unclassified	Unclassified	0.0701262	0.422396	0.491301	0.0161768	0.0222954	0.0107252	0.0118683	0.0252373	0.0520313	0.0192219	0.0132085	0.337934	0.190132	0.180532	0.0186432	0.0114631	0.0905305	0.00627323	0.00990357
CPM	Secretory	Unclassified	0.980923	0.00705812	0.00599164	0.0060277	0.514263	0.0984527	0.105498	0.262709	0.00248821	0.0016307	0.00162302	0.00131619	0.00141386	0.00109529	0.00109344	0.00111433	0.00127472	0.00473472	0.00129298
CPNE1	Cytosol	Unclassified	0.003396	0.00457597	0.990555	0.00147272	0.000997177	0.000760819	0.000709074	0.000928925	0.00098382	0.000966428	0.00100186	0.00162387	0.0210206	0.0287308	0.144125	0.29035	0.506329	0.000660656	0.000812061
CPNE2	Cytosol	C2	0.0142489	0.0219549	0.958711	0.00508548	0.00446227	0.00311234	0.00278315	0.00389114	0.00498082	0.00359702	0.0037544	0.00962269	0.147459	0.696902	0.0275621	0.00830534	0.0784828	0.002046	0.00303948
CPNE3	Cytosol	Unclassified	0.00584098	0.00674798	0.984844	0.00256715	0.00166436	0.00126061	0.00122268	0.00169332	0.00171969	0.00154951	0.00173809	0.00174068	0.333837	0.0269225	0.462403	0.0678073	0.0938742	0.00104208	0.00152507
CPNE7	Cytosol	Unclassified	0.0140562	0.0182893	0.962021	0.00563295	0.00420935	0.00328316	0.00290515	0.00365858	0.00401274	0.00370777	0.00435901	0.0062098	0.139317	0.172491	0.140483	0.049943	0.459787	0.00229049	0.00334245
CPNE8	Cytosol	C2	0.00698899	0.00864454	0.981339	0.00302795	0.00197638	0.00156521	0.00145505	0.00199236	0.0020225	0.00206959	0.00210111	0.00245134	0.234732	0.637667	0.0320613	0.00718974	0.0696885	0.00128772	0.00174023
CPOX	Nuclear	N4	0.0229399	0.932558	0.0272006	0.0173011	0.00684835	0.0050559	0.00513634	0.00589933	0.00668678	0.0199648	0.0110032	0.894903	0.00519672	0.00665879	0.00359408	0.00444892	0.00730211	0.0121754	0.00512574
CPPED1	Cytosol	Unclassified	0.00910018	0.0131028	0.974468	0.00332915	0.00305529	0.00208204	0.00170191	0.00226094	0.0027355	0.00235658	0.00288976	0.005121	0.0190455	0.025459	0.0507097	0.300778	0.578476	0.00130446	0.00202469
CPQ	Unclassified	Unclassified	0.135542	0.59215	0.235783	0.0365245	0.0317679	0.0165328	0.0315311	0.0557101	0.0257893	0.0251663	0.0188138	0.522381	0.0552707	0.111173	0.0136199	0.00963562	0.0460838	0.0136411	0.0228834
CPS1	Mitochondria	Unclassified	0.0600494	0.328749	0.0425475	0.568654	0.0111232	0.0114501	0.0199998	0.0174764	0.0116865	0.0309975	0.0291304	0.256934	0.00895917	0.00901426	0.00633276	0.00754723	0.0106941	0.545716	0.022938
CPSF1	Nuclear	Unclassified	0.00342582	0.990355	0.00420146	0.00201746	0.000971293	0.000739846	0.000575218	0.00113946	0.0125237	0.724301	0.249734	0.00379634	0.000792035	0.000767254	0.000876115	0.000835409	0.00093065	0.00123952	0.000777936
CPSF2	Nuclear	Unclassified	0.0031038	0.991289	0.00342351	0.00218363	0.00070777	0.000627534	0.000605365	0.00116313	0.00628909	0.87617	0.102088	0.00674189	0.000664416	0.000646862	0.00072226	0.000653107	0.000736863	0.00130986	0.000873771
CPSF3	Nuclear	Unclassified	0.0517244	0.872792	0.0506297	0.0248542	0.00869585	0.00862191	0.008159	0.0262476	0.025514	0.579619	0.199058	0.0686003	0.0133729	0.012274	0.00635333	0.00635042	0.012279	0.0117688	0.0130854
CPSF4	Nuclear	Unclassified	0.00282854	0.992235	0.00335117	0.00158527	0.000835377	0.000600618	0.000521378	0.000871165	0.021408	0.560034	0.408011	0.00278206	0.000611298	0.000622382	0.000740181	0.000678247	0.000699058	0.000998314	0.000586953
CPSF6	Nuclear	N4	0.00750353	0.965627	0.0240391	0.00283051	0.00227629	0.00160787	0.00162831	0.00199106	0.0020136	0.00303639	0.00249692	0.95808	0.0022466	0.00370187	0.0013972	0.001864	0.0148294	0.00128921	0.0015413
CPSF7	Nuclear	N4	0.012364	0.963441	0.0200693	0.00412582	0.00420646	0.00280541	0.00218618	0.00316592	0.00411013	0.00434082	0.00438932	0.950601	0.00303873	0.0057368	0.00209382	0.00280426	0.00639567	0.00171678	0.00240904
CPT1A	Mitochondria	M2	0.0531744	0.00164072	0.00242138	0.942763	0.0126316	0.0100992	0.00292596	0.0275177	0.000372352	0.000465248	0.000394586	0.000408536	0.000450642	0.000475978	0.00051781	0.000479182	0.000497771	0.00796644	0.934797
CPT2	Mitochondria	M1	0.0741234	0.0437396	0.00594653	0.87619	0.00353572	0.00545539	0.0531565	0.0119758	0.00213956	0.0164453	0.0225872	0.00256763	0.00112399	0.00121971	0.0012369	0.00117302	0.00119291	0.814219	0.0619717
CPTP	Cytosol	Unclassified	0.0226755	0.0297373	0.938866	0.00872091	0.00689117	0.00534357	0.0045774	0.00586331	0.00638219	0.00606271	0.0073384	0.00995404	0.178395	0.435342	0.0837323	0.0210718	0.220325	0.00337689	0.00534402
CRABP2	Cytosol	Unclassified	0.00654923	0.00799208	0.982832	0.00262636	0.00208581	0.00143892	0.00127656	0.00174795	0.00195658	0.00176971	0.00199229	0.0022735	0.0384946	0.01634	0.252679	0.631914	0.043404	0.00109046	0.00153591
CRACR2B	Nuclear	Unclassified	0.0881746	0.66757	0.013053	0.231202	0.00857496	0.0160384	0.0163888	0.0471725	0.00828234	0.0855703	0.570592	0.00312532	0.00269551	0.00285264	0.00233086	0.00262314	0.0025509	0.0978585	0.133344
CRADD	Cytosol	Unclassified	0.00613992	0.00783856	0.983517	0.00250415	0.00195756	0.00131916	0.00119711	0.00166609	0.00192209	0.00168152	0.00184872	0.00238624	0.0438143	0.0157338	0.182347	0.250526	0.491096	0.00104427	0.00145989
CRAMP1	Nuclear	N1	0.00236895	0.993147	0.00362849	0.000855832	0.000766567	0.000485853	0.000458918	0.000657613	0.982345	0.00551207	0.00342457	0.00186464	0.000569123	0.000656131	0.000811485	0.000815909	0.000775841	0.000413018	0.000442813
CRAT	Unclassified	Unclassified	0.0949748	0.3383	0.066155	0.50057	0.0198752	0.0210748	0.02851	0.0255147	0.0211357	0.0265888	0.0352515	0.255324	0.0137344	0.0120793	0.00948152	0.0120973	0.0187625	0.476318	0.0242516
CRB1	Nuclear	N4	0.0266293	0.953112	0.0125458	0.00771258	0.00354057	0.00280456	0.0140163	0.00626788	0.0115533	0.0225864	0.00448053	0.914492	0.00233558	0.00333535	0.00160268	0.00206457	0.00320759	0.00464378	0.0030688
CRBN	Cytosol	Unclassified	0.00444129	0.00584259	0.987749	0.0019668	0.00124364	0.00102145	0.000954977	0.00122123	0.00121489	0.00123587	0.00132316	0.00206867	0.0411739	0.0765246	0.156408	0.100562	0.613081	0.000877471	0.00108933
CRCP	Unclassified	Unclassified	0.134585	0.187665	0.643283	0.0344671	0.0544043	0.0297202	0.0189232	0.0315376	0.0554274	0.0311595	0.0445282	0.0565497	0.412525	0.0637447	0.0407	0.0408681	0.0854452	0.0112611	0.023206
CREB3L2	Secretory	Unclassified	0.854722	0.0146676	0.00733985	0.12327	0.019843	0.261481	0.524646	0.0487528	0.00270981	0.00589157	0.00393308	0.00213309	0.00145809	0.00146709	0.00142447	0.00146967	0.00152053	0.10936	0.0139104
CREB5	Nuclear	Unclassified	0.0140588	0.967544	0.0112422	0.00715487	0.00381704	0.00321484	0.00306215	0.00396479	0.031945	0.701536	0.223459	0.0106037	0.00217146	0.00201274	0.00211646	0.00218069	0.00276084	0.00359607	0.00355881
CREBBP	Nuclear	N4	0.0130058	0.961934	0.0201889	0.00487087	0.00429356	0.00278841	0.00242534	0.00349851	0.0046327	0.0046162	0.00479769	0.947888	0.003282	0.00440632	0.00221727	0.00292626	0.00735702	0.00207589	0.00279498
CREBZF	Nuclear	N4	0.0920136	0.804251	0.0840614	0.0196742	0.0194159	0.0102016	0.0169611	0.045435	0.05004	0.137581	0.0239524	0.592678	0.0340568	0.0195593	0.00570198	0.00490887	0.0198344	0.00840349	0.0112707
CRELD1	Secretory	Unclassified	0.974506	0.00802279	0.00598052	0.0114912	0.0651372	0.715673	0.0941303	0.0995651	0.00233361	0.00290513	0.00126013	0.00152391	0.00144538	0.00121891	0.00104626	0.00105028	0.0012197	0.00533085	0.00616031
CRELD2	Nuclear	N4	0.0416046	0.888869	0.0544805	0.0150457	0.0135413	0.00912656	0.00869581	0.0102409	0.0127751	0.0149524	0.0152477	0.845894	0.0083994	0.0181086	0.00603666	0.00779442	0.0141414	0.006585	0.00846075
CREM	Nuclear	Unclassified	0.0641054	0.889769	0.0264945	0.0196315	0.0100678	0.0120082	0.0118468	0.0301827	0.0749833	0.524779	0.260461	0.0295462	0.00821987	0.00523281	0.00389684	0.00351797	0.00562699	0.0100757	0.00955577
CRIP2	Cytosol	Unclassified	0.00719352	0.0203166	0.969636	0.00285398	0.00224096	0.00163978	0.00142208	0.00189071	0.00218311	0.002082	0.00231814	0.0137334	0.0144721	0.0332358	0.0389321	0.165366	0.717629	0.00120256	0.00165142
CRIPT	Cytosol	Unclassified	0.0466337	0.106008	0.831525	0.0158336	0.0164828	0.0107622	0.0082793	0.0111095	0.0155757	0.0121116	0.0161122	0.0622083	0.0253215	0.042442	0.0226132	0.0594236	0.681725	0.00579345	0.0100402
CRISPLD1	Secretory	Unclassified	0.936253	0.0375612	0.0116247	0.0145613	0.508765	0.0868019	0.236546	0.10414	0.0227103	0.00519355	0.00640776	0.00324956	0.00274619	0.0020677	0.00210418	0.00221506	0.00249158	0.0118044	0.00275691
CRISPLD2	Secretory	Unclassified	0.792341	0.108748	0.0809723	0.0179386	0.537184	0.0499097	0.118177	0.0870697	0.0789714	0.00938487	0.0110852	0.00930644	0.0461157	0.00924427	0.00728779	0.00751792	0.0108066	0.00872242	0.00921616
CRK	Cytosol	Unclassified	0.0136626	0.020764	0.960851	0.00472186	0.00474056	0.00313311	0.00247467	0.00331429	0.00417293	0.00346926	0.00451368	0.00860816	0.0199126	0.0270703	0.0313935	0.207958	0.674517	0.00175791	0.00296395
CRKL	Cytosol	Unclassified	0.0042593	0.00693393	0.987029	0.00177809	0.00130151	0.000949384	0.000868744	0.00113966	0.0012689	0.00120048	0.00128048	0.00318407	0.0110945	0.0314503	0.0387305	0.196248	0.709505	0.000781392	0.000996702
CRLF1	Secretory	Unclassified	0.920767	0.0140896	0.00818472	0.0569588	0.131409	0.0677747	0.626649	0.0949343	0.00345474	0.0051348	0.00256583	0.00293423	0.0025089	0.00161354	0.00131913	0.00121022	0.00153293	0.0534623	0.00349655
CRLF3	Cytosol	Unclassified	0.00509412	0.00676032	0.986052	0.00209342	0.00158199	0.00112528	0.00102374	0.0013631	0.00153631	0.00140424	0.00152362	0.00229616	0.025722	0.0193893	0.110651	0.250978	0.579312	0.000902251	0.00119117
CRLS1	Secretory	Unclassified	0.895682	0.00665056	0.00555338	0.0921139	0.0864461	0.287389	0.411523	0.110324	0.00136694	0.00214313	0.00195418	0.00118631	0.00109099	0.0011127	0.00108994	0.00110192	0.00115783	0.0575916	0.0345224
CRMP1	Cytosol	Unclassified	0.00404149	0.0049902	0.98926	0.0017087	0.00124717	0.000895418	0.000819474	0.00107943	0.00121098	0.00114274	0.00118449	0.00145199	0.0224596	0.0154412	0.136023	0.62432	0.191016	0.000752992	0.000955706
CRNKL1	Nuclear	Unclassified	0.00326496	0.990924	0.00389222	0.00191928	0.000895023	0.000625507	0.00073207	0.00101236	0.0177551	0.714138	0.253428	0.00560283	0.000695349	0.00072942	0.000859855	0.000777109	0.000830485	0.00119632	0.00072296
CROCC	Cytosol	Unclassified	0.0734552	0.0629771	0.804266	0.0593019	0.0158284	0.0188407	0.0153903	0.0233958	0.00705566	0.0127458	0.0289091	0.0142666	0.212118	0.459013	0.0549411	0.0339626	0.0442313	0.0141036	0.0451983
CRTAP	Secretory	Unclassified	0.697377	0.0642129	0.0112636	0.227147	0.010241	0.0196785	0.639692	0.0277653	0.00645973	0.0258828	0.00900109	0.0228692	0.00226154	0.00227819	0.00216131	0.00215083	0.00241178	0.214644	0.0125028
CRTC2	Nuclear	N4	0.00630684	0.97723	0.0141683	0.00229516	0.00189276	0.0013857	0.00138349	0.0016449	0.00144906	0.00256809	0.00198067	0.971232	0.00204655	0.00368472	0.00117699	0.00140588	0.00585413	0.00106791	0.00122725
CRTC3	Nuclear	N4	0.0184242	0.876439	0.0991045	0.00603256	0.00604489	0.0043445	0.00368926	0.00434558	0.00502064	0.00560619	0.00601563	0.859796	0.0116325	0.0248337	0.00686518	0.00662254	0.0491506	0.00243439	0.00359817
CRY1	Nuclear	N4	0.0119508	0.910805	0.0733737	0.00387049	0.00314498	0.00202223	0.0022066	0.00457701	0.00472165	0.00528891	0.00326562	0.897529	0.0073891	0.0532242	0.00287418	0.00200032	0.00788585	0.00158936	0.00228113
CRY2	Nuclear	N4	0.0132344	0.919037	0.063336	0.00439219	0.00387702	0.00261325	0.00249121	0.00425295	0.014651	0.00664017	0.00445403	0.893292	0.00693893	0.041262	0.00313524	0.00278046	0.00921937	0.00189066	0.00250152
CRYAB	Cytosol	Unclassified	0.00430507	0.00495458	0.988827	0.00191299	0.00122415	0.00093275	0.000903387	0.00124478	0.00127083	0.00115105	0.00126753	0.00126518	0.16904	0.0190998	0.570662	0.114874	0.115151	0.000801844	0.00111114
CRYBG1	Cytosol	Unclassified	0.0258715	0.0990047	0.865974	0.0091496	0.00849336	0.00611601	0.00493522	0.00632693	0.0081524	0.0071816	0.00874512	0.0749256	0.0188103	0.0734634	0.0188772	0.129115	0.625709	0.0035534	0.0055962
CRYBG3	Cytosol	Unclassified	0.00247179	0.002673	0.993649	0.0012067	0.00066463	0.000537042	0.000531439	0.00073868	0.00062048	0.000703439	0.000728815	0.000620266	0.628154	0.157337	0.17438	0.0170661	0.0167108	0.00051285	0.000693855
CRYL1	Cytosol	Unclassified	0.0153053	0.0255686	0.953324	0.0058021	0.00502068	0.00348363	0.00289069	0.00391031	0.00479001	0.00405526	0.00495005	0.0117733	0.078736	0.0293587	0.0643638	0.0957437	0.685122	0.00235248	0.00344962
CRYZ	Cytosol	Unclassified	0.0309858	0.0840405	0.870411	0.0145627	0.00988771	0.00702781	0.00566521	0.00840504	0.0074904	0.0105589	0.0126392	0.0533521	0.28258	0.477065	0.0340196	0.0266184	0.0501278	0.0064139	0.00814879
CRYZL1	Cytosol	Unclassified	0.0106982	0.0178479	0.967599	0.00385457	0.00362621	0.00243582	0.0019884	0.00264776	0.00329493	0.00276619	0.00343582	0.00835097	0.0171749	0.0343104	0.0300459	0.17265	0.713418	0.00148706	0.0023675
CS	Nuclear	N4	0.0636997	0.716608	0.069127	0.150565	0.0107956	0.0131014	0.013299	0.0265037	0.0107314	0.0649829	0.0403447	0.600549	0.0167252	0.0221933	0.00773064	0.00873111	0.0137469	0.115862	0.0347023
CSE1L	Cytosol	C1	0.00304376	0.00346779	0.992035	0.00145393	0.000834191	0.000681852	0.000640984	0.000886737	0.000819422	0.00087695	0.000930457	0.000840963	0.73088	0.0802523	0.154239	0.0189063	0.0077571	0.000609515	0.000844417
CSF2RA	Secretory	S1	0.966425	0.0136145	0.00836799	0.0115922	0.619641	0.15642	0.0420612	0.148303	0.0045337	0.00390987	0.00314424	0.00202673	0.00184923	0.00160708	0.00149245	0.00156377	0.00185546	0.00931157	0.00228062
CSGALNACT2	Secretory	S1	0.976156	0.00179193	0.00266503	0.0193872	0.646579	0.0806893	0.0607041	0.188183	0.000310174	0.00057176	0.000439655	0.000470341	0.000463389	0.00053425	0.000576532	0.000553835	0.000537022	0.0125493	0.0068379
CSK	Cytosol	Unclassified	0.00747091	0.00868701	0.980589	0.00325351	0.00215329	0.00161182	0.00155204	0.00215376	0.00228702	0.00193015	0.00226262	0.00220722	0.213376	0.0162623	0.547829	0.116748	0.0863737	0.0012944	0.00195911
CSNK1G1	Secretory	Unclassified	0.951514	0.0182758	0.0142853	0.0159252	0.511006	0.181463	0.0466999	0.212345	0.00536293	0.00443409	0.00479455	0.00368427	0.00320271	0.00264703	0.00247291	0.00267349	0.00328919	0.0127914	0.00313378
CSNK1G2	Secretory	Unclassified	0.82864	0.1046	0.0502401	0.0165203	0.496707	0.0524571	0.156259	0.123216	0.0781907	0.0090028	0.0107715	0.00663485	0.025396	0.0063582	0.00552905	0.00542148	0.00753542	0.00814572	0.00837454
CSNK1G3	Secretory	Unclassified	0.966972	0.0143224	0.0100336	0.00867218	0.522529	0.14389	0.0915621	0.208991	0.00491053	0.00325231	0.00363193	0.00252763	0.00224926	0.00180316	0.00176615	0.00192171	0.00229334	0.00643383	0.00223834
CSNK2A1	Nuclear	N4	0.0132528	0.862555	0.119512	0.00468058	0.00404337	0.00289857	0.0027678	0.00354304	0.00338992	0.00504886	0.00433785	0.849778	0.00992367	0.0266649	0.00457124	0.00626071	0.0720914	0.00212128	0.0025593
CSNK2A2	Unclassified	Unclassified	0.0274662	0.344364	0.618336	0.00983354	0.00841803	0.00649001	0.00550915	0.00704904	0.0079742	0.00766617	0.00863276	0.320091	0.0259103	0.0751239	0.0153022	0.0262093	0.47579	0.00396504	0.0058685
CSPG4	Secretory	Unclassified	0.976057	0.00811869	0.00636783	0.00945641	0.516633	0.111827	0.234693	0.112904	0.00317646	0.00182834	0.00189819	0.00121571	0.00182031	0.00111013	0.00110443	0.00111417	0.0012188	0.00773332	0.00172309
CSPG5	Secretory	Unclassified	0.901543	0.0682497	0.0184292	0.0117782	0.503181	0.0912896	0.190705	0.116367	0.046637	0.00755642	0.00944351	0.0046128	0.0053221	0.00308501	0.00291426	0.0032075	0.00390028	0.00790688	0.00387131
CSPP1	Nuclear	N4	0.034196	0.863839	0.0945133	0.0074518	0.00797296	0.0042203	0.00617664	0.0158261	0.0151287	0.014189	0.00582956	0.828692	0.0211506	0.0472247	0.00478814	0.00281616	0.0185337	0.00310712	0.00434469
CSRP2	Nuclear	N4	0.0148631	0.852961	0.126734	0.00544208	0.00474486	0.00324015	0.00309399	0.00378408	0.00498727	0.00529332	0.0052778	0.837403	0.00510046	0.00703627	0.00341067	0.00583014	0.105356	0.00224226	0.00319982
CSRP3	Cytosol	Unclassified	0.0375835	0.0471416	0.903198	0.0120773	0.0127012	0.00919882	0.00691678	0.00876675	0.0117654	0.00882332	0.0126036	0.0139493	0.0275601	0.0174131	0.0437687	0.602783	0.211672	0.00436073	0.0077166
CST3	Nuclear	N4	0.0183408	0.963189	0.0124482	0.00602234	0.00281823	0.00197784	0.0063737	0.00717103	0.0050437	0.0377184	0.00414667	0.91628	0.00235162	0.00431635	0.00136556	0.00141529	0.00299938	0.00318077	0.00284157
CSTB	Cytosol	Unclassified	0.0103796	0.0130506	0.97265	0.00391965	0.00340172	0.00235549	0.00197468	0.00264774	0.00314909	0.00273609	0.00326656	0.00389884	0.040916	0.0183972	0.141389	0.618171	0.153777	0.00155252	0.00236712
CSTF1	Unclassified	Unclassified	0.0966437	0.5935	0.263112	0.0467438	0.0207371	0.0200242	0.0144614	0.041421	0.032407	0.262875	0.218526	0.0796925	0.0807791	0.0826291	0.024296	0.0322906	0.0431174	0.017865	0.0288788
CSTF2	Nuclear	Unclassified	0.025254	0.934115	0.0294744	0.0111561	0.00754391	0.00570753	0.00423896	0.00776365	0.018099	0.798762	0.0478039	0.0694508	0.00629024	0.00584885	0.00432188	0.00514656	0.00786683	0.00507156	0.00608455
CSTF2T	Unclassified	Unclassified	0.111984	0.568619	0.274932	0.0444656	0.0316948	0.0247746	0.0179132	0.037601	0.0416086	0.261552	0.127708	0.137751	0.0819333	0.0748343	0.0265209	0.0386945	0.0529485	0.017132	0.0273336
CSTF3	Nuclear	N2	0.00748167	0.979759	0.00864312	0.00411575	0.00221667	0.00174656	0.00129951	0.00221893	0.00553499	0.925973	0.0118589	0.0363922	0.00165419	0.00162235	0.00159559	0.00166734	0.00210364	0.00210946	0.00200629
CT83	Secretory	Unclassified	0.828442	0.12002	0.0256441	0.0258941	0.0382544	0.601133	0.113561	0.0754939	0.0297619	0.0727315	0.00866288	0.00886335	0.0063217	0.00491027	0.0038626	0.00466566	0.00588391	0.00798683	0.0179073
CTAGE5	Secretory	Unclassified	0.975183	0.0037269	0.00402357	0.0170665	0.0712755	0.611805	0.179188	0.112914	0.000976122	0.00100185	0.000893166	0.000855765	0.000836918	0.000815229	0.000806303	0.000760981	0.000804144	0.00904565	0.00802089
CTBP1	Nuclear	N4	0.00832751	0.870976	0.117706	0.00299042	0.00243813	0.00182246	0.00178291	0.00228401	0.00190491	0.00313614	0.00266311	0.863272	0.00843965	0.0666469	0.00420606	0.00337955	0.0350336	0.00129891	0.00169152
CTBP2	Nuclear	N4	0.00539456	0.980764	0.0118273	0.00201412	0.00162136	0.00120614	0.00117409	0.00139298	0.0012951	0.00244303	0.00169275	0.975333	0.00158275	0.00383097	0.00101883	0.00121258	0.00418218	0.000945269	0.00106885
CTBS	Nuclear	N4	0.203765	0.719134	0.049634	0.0274671	0.0173128	0.0137549	0.149973	0.0227249	0.0294145	0.0329036	0.018049	0.638767	0.0092127	0.00992305	0.00685672	0.0086815	0.01496	0.0145209	0.0129462
CTC1	Nuclear	N4	0.0479206	0.699489	0.241229	0.0113613	0.0105614	0.00617343	0.00811208	0.0230736	0.0435018	0.0225932	0.0118347	0.62156	0.050711	0.118764	0.0107	0.00585168	0.0552024	0.00410738	0.00725395
CTCF	Nuclear	N1	0.00688338	0.98473	0.0064603	0.00192595	0.00283932	0.00116057	0.00124208	0.00164142	0.576373	0.0127537	0.393745	0.00185796	0.00135014	0.00123363	0.00121306	0.00122462	0.00143885	0.00112294	0.000803011
CTDP1	Nuclear	N4	0.0123612	0.961132	0.021746	0.00476048	0.00396552	0.00277719	0.00254143	0.00307704	0.00345571	0.00441186	0.00448172	0.948783	0.00329085	0.00681431	0.00223125	0.00269468	0.0067149	0.00206586	0.00269461
CTDSP1	Secretory	Unclassified	0.976276	0.00735854	0.00651786	0.00984757	0.487385	0.125839	0.0581982	0.304853	0.00186159	0.00194867	0.00197717	0.00157112	0.00140204	0.00126004	0.00119892	0.00122588	0.00143098	0.00833229	0.00151528
CTDSP2	Secretory	Unclassified	0.983852	0.00551667	0.00411163	0.00651933	0.532394	0.090237	0.144389	0.216833	0.00214494	0.00126027	0.0012973	0.000814155	0.000981666	0.000756444	0.000768963	0.000770041	0.000834515	0.00556771	0.000951619
CTDSPL	Secretory	Unclassified	0.982486	0.00159871	0.00224916	0.0136658	0.590083	0.108363	0.0673669	0.216673	0.000299484	0.000527023	0.000398389	0.000373813	0.00041261	0.000455871	0.000482311	0.000455138	0.000443233	0.010874	0.00279174
CTGF	Secretory	Unclassified	0.759416	0.18605	0.0275913	0.0269431	0.0655513	0.0427237	0.600291	0.0508494	0.0808104	0.0219272	0.00752237	0.0757896	0.00898376	0.00521886	0.00392782	0.00400143	0.00545948	0.0204542	0.0064889
CTH	Cytosol	Unclassified	0.00466758	0.00697047	0.986419	0.00194328	0.00143466	0.00103541	0.000943517	0.001254	0.00137709	0.00130732	0.00140158	0.00288447	0.0287495	0.0562624	0.0725471	0.236005	0.592854	0.000835784	0.0011075
CTHRC1	Cytosol	Unclassified	0.0130009	0.0149523	0.966443	0.00560416	0.00410203	0.00284757	0.00269215	0.00335913	0.00350869	0.00303474	0.00352807	0.0048808	0.200758	0.547893	0.049523	0.0138874	0.154382	0.00206938	0.00353478
CTIF	Cytosol	Unclassified	0.00667804	0.00827765	0.982345	0.0026991	0.0020828	0.00153786	0.00134308	0.0017143	0.00195801	0.00181381	0.00200342	0.00250242	0.0339756	0.0196739	0.147727	0.59297	0.187998	0.00114903	0.00155008
CTNNA1	Secretory	Unclassified	0.920988	0.0100787	0.0235449	0.0453888	0.485165	0.12935	0.175712	0.13076	0.00248367	0.00269749	0.00270162	0.00219588	0.00916967	0.00475425	0.00357812	0.00292852	0.00311431	0.00883381	0.036555
CTNNA2	Cytosol	Unclassified	0.00671039	0.00627272	0.983798	0.00321877	0.00161692	0.00126702	0.00155041	0.00227604	0.00138214	0.00149518	0.00229795	0.00109745	0.624816	0.275468	0.0518955	0.0179616	0.0136576	0.000859894	0.00235887
CTNNB1	Secretory	Unclassified	0.967314	0.00198449	0.00214301	0.0285583	0.459343	0.165659	0.156686	0.185626	0.000395372	0.000686921	0.000532535	0.000369662	0.000411269	0.000416832	0.000451759	0.000439855	0.000423298	0.0264531	0.00210515
CTNNBIP1	Cytosol	Unclassified	0.00712713	0.00857599	0.98121	0.00308673	0.00216432	0.00149909	0.00141712	0.00204661	0.0022371	0.00189574	0.00222611	0.00221704	0.0896325	0.013859	0.483779	0.231986	0.161953	0.00121912	0.00186761
CTNNBL1	Nuclear	N4	0.0133561	0.9742	0.00656467	0.00587937	0.00155132	0.00133074	0.00808825	0.00238582	0.00367384	0.0641227	0.00509219	0.901311	0.00113548	0.0015888	0.00105014	0.00110646	0.00168379	0.00365471	0.00222466
CTNND1	Secretory	Unclassified	0.871809	0.00546336	0.00516525	0.117562	0.217305	0.193679	0.315033	0.145791	0.00105016	0.00189002	0.00148211	0.00104107	0.00105324	0.00101248	0.00101818	0.00102529	0.00105606	0.105939	0.0116236
CTPS2	Cytosol	Unclassified	0.00939612	0.0112079	0.975665	0.00373085	0.00292402	0.00216646	0.00188364	0.002422	0.00282009	0.0024701	0.00281844	0.0030993	0.0876038	0.0162418	0.493308	0.219665	0.158846	0.00156206	0.00216879
CTR9	Nuclear	N4	0.00738616	0.974512	0.015517	0.00258476	0.00195783	0.00141797	0.00138123	0.00262913	0.00262834	0.0120109	0.00306912	0.956804	0.00224382	0.00750235	0.00138596	0.00139115	0.00299371	0.00115865	0.00142611
CTSA	Secretory	Unclassified	0.912981	0.0289878	0.0168842	0.0411472	0.0855495	0.0587759	0.691214	0.0774419	0.0072087	0.00535392	0.00277225	0.013653	0.00489952	0.00333183	0.00265244	0.00262884	0.00337152	0.0378849	0.00326234
CTSB	Nuclear	N4	0.154665	0.737802	0.073745	0.0337886	0.0267209	0.0204703	0.0833061	0.0241673	0.035521	0.0295468	0.0255669	0.647167	0.0137009	0.0134759	0.0100416	0.0132233	0.0233034	0.0170143	0.0167743
CTSC	Secretory	Unclassified	0.806087	0.0925746	0.0369969	0.0643414	0.0834821	0.0477541	0.564966	0.109885	0.0165752	0.0177194	0.00806016	0.0502198	0.0136362	0.00792046	0.00452075	0.0039742	0.00694534	0.0524304	0.011911
CTSH	Unclassified	Unclassified	0.24797	0.611251	0.102357	0.0384219	0.0370389	0.0300031	0.146916	0.034012	0.0685967	0.0405747	0.0358012	0.466278	0.0194682	0.016795	0.0141436	0.0189702	0.0329804	0.0171625	0.0212594
CTSL	Unclassified	Unclassified	0.222177	0.450477	0.276027	0.05132	0.0508105	0.0223416	0.0592634	0.0897614	0.042528	0.0334922	0.0260957	0.348361	0.095594	0.0965948	0.0161363	0.01091	0.0567916	0.01778	0.0335399
CTSO	Cytosol	C2	0.0185056	0.0514541	0.922945	0.00709504	0.00559333	0.00398854	0.00362122	0.00530251	0.0045774	0.00460719	0.00495984	0.0373097	0.0811273	0.647442	0.0345687	0.0112855	0.148522	0.00269492	0.00440013
CTSV	Nuclear	N4	0.202448	0.738417	0.027686	0.0314492	0.016338	0.0148681	0.141226	0.0300156	0.0193938	0.0274239	0.0101617	0.681438	0.00635769	0.00631524	0.00376174	0.0041258	0.00712548	0.021331	0.0101183
CTSZ	Secretory	S3	0.929956	0.024006	0.012159	0.0338787	0.0500063	0.0483783	0.775806	0.0557655	0.00595509	0.00564114	0.00280587	0.00960386	0.00262687	0.00229005	0.00222015	0.0022908	0.00273114	0.031277	0.00260171
CTTN	Cytosol	Unclassified	0.00248867	0.00266432	0.993622	0.00122545	0.000669537	0.000544285	0.000546836	0.000728009	0.000626298	0.000719878	0.000723864	0.00059428	0.504721	0.212213	0.215735	0.0184322	0.0425209	0.000528368	0.000697079
CTTNBP2NL	Cytosol	C5	0.0133218	0.040123	0.941224	0.00533143	0.003909	0.00316273	0.00279517	0.00345491	0.00383027	0.00356069	0.0040537	0.0286783	0.0191286	0.100929	0.0200904	0.041928	0.759148	0.0022637	0.00306773
CTU2	Cytosol	Unclassified	0.00339937	0.00376129	0.991302	0.00153743	0.000944854	0.000757026	0.000733829	0.000963661	0.000939886	0.000911112	0.000987829	0.000922462	0.30311	0.0370485	0.530331	0.0510918	0.0697212	0.00065977	0.000877657
CUEDC1	Cytosol	Unclassified	0.00299239	0.00359177	0.991924	0.00149177	0.000799068	0.000650136	0.000663768	0.000879413	0.000716033	0.000882322	0.000814079	0.00117934	0.170716	0.611782	0.0950851	0.0089356	0.105406	0.000663616	0.000828152
CUEDC2	Cytosol	Unclassified	0.00761805	0.0117059	0.977714	0.00296185	0.00242278	0.00173944	0.00150882	0.00194701	0.0022656	0.0020676	0.00237345	0.0049993	0.0205495	0.0268839	0.0379818	0.189481	0.702818	0.00123924	0.00172261
CUL1	Cytosol	Unclassified	0.00917168	0.0615122	0.925687	0.00362905	0.00266409	0.00203032	0.00189247	0.0025848	0.00291402	0.00275202	0.00289153	0.0529546	0.0338034	0.623573	0.015655	0.00865859	0.243997	0.00144315	0.0021859
CUL2	Cytosol	C2	0.0070299	0.0243428	0.965666	0.0029613	0.00201305	0.00153599	0.0014571	0.00202377	0.00205115	0.00202023	0.00212293	0.0181485	0.0425472	0.736578	0.019631	0.00633231	0.160577	0.0012006	0.0017607
CUL3	Cytosol	C2	0.00725855	0.0173104	0.972398	0.00303349	0.00210511	0.00159704	0.0015164	0.00204	0.00214438	0.0019789	0.00209599	0.0110912	0.0452344	0.763961	0.0210548	0.00569889	0.136448	0.00123299	0.0018005
CUL4A	Cytosol	Unclassified	0.0237681	0.081625	0.886001	0.00860596	0.00650149	0.00491355	0.00443183	0.0079212	0.00979651	0.0103322	0.00966154	0.0518347	0.111552	0.615281	0.0211211	0.0136258	0.124421	0.00328099	0.00532496
CUL5	Cytosol	C2	0.00575192	0.014875	0.976906	0.0024676	0.00165377	0.00131273	0.001228	0.00155742	0.00160518	0.00165272	0.00174976	0.00986731	0.0294738	0.696507	0.022027	0.00764363	0.221255	0.0010536	0.001414
CUL7	Cytosol	C1	0.00279884	0.00309368	0.99273	0.00137769	0.000753266	0.000621438	0.000591718	0.000832417	0.000721848	0.000818603	0.000870364	0.000682869	0.760958	0.120354	0.0916387	0.0128899	0.00688883	0.000568912	0.000808778
CUL9	Cytosol	C1	0.0062482	0.00616465	0.985078	0.00250957	0.00182279	0.0012802	0.00132809	0.00181711	0.00174184	0.00129466	0.00189235	0.00123579	0.79799	0.115115	0.0429102	0.0176551	0.0114068	0.000805895	0.00170368
CUTA	Cytosol	Unclassified	0.00935006	0.0128487	0.974258	0.0035432	0.00299946	0.00219984	0.00182341	0.00232735	0.0027817	0.00250037	0.00296025	0.00460634	0.0363116	0.0239071	0.0568178	0.288566	0.568655	0.00145559	0.00208761
CUTC	Nuclear	N4	0.0133795	0.874452	0.107302	0.0048671	0.00417372	0.00306214	0.00280924	0.00333436	0.00416572	0.00538676	0.00458943	0.86031	0.00574175	0.0432469	0.00338568	0.00386298	0.0510644	0.00204413	0.00282298
CUX1	Mitochondria	Unclassified	0.262941	0.110666	0.00930042	0.617093	0.0107564	0.0259807	0.193155	0.0330491	0.00712373	0.0508218	0.048818	0.00390248	0.00185671	0.0018483	0.00183876	0.00183884	0.00191781	0.576092	0.0410003
CWC15	Nuclear	N4	0.0851466	0.786632	0.103243	0.0249782	0.0305598	0.0195589	0.0153265	0.0197014	0.0347398	0.043306	0.0342544	0.674332	0.0206943	0.0191168	0.0130578	0.0176106	0.0327637	0.00946234	0.0155159
CWC22	Nuclear	Unclassified	0.00814738	0.981529	0.00361091	0.00671242	0.0012275	0.0012901	0.00403425	0.00159552	0.0187957	0.737964	0.220907	0.00386203	0.000649797	0.000725531	0.00078795	0.000699571	0.000748059	0.00469735	0.00201507
CWC25	Nuclear	Unclassified	0.0153143	0.969983	0.00799297	0.00670929	0.00196528	0.00179952	0.00854867	0.00300081	0.012089	0.712831	0.0170058	0.228058	0.001486	0.00153051	0.00150486	0.00149796	0.00197363	0.00399847	0.00271082
CWC27	Nuclear	N4	0.00583166	0.964609	0.0274944	0.00206498	0.0016806	0.00125731	0.00120886	0.00168489	0.00136711	0.00259328	0.0019106	0.958738	0.00328655	0.0167883	0.00145083	0.00136043	0.00460827	0.000918256	0.00114673
CWF19L1	Nuclear	N4	0.0128245	0.952424	0.0295931	0.00515829	0.00414307	0.00278171	0.00257109	0.00332867	0.00432169	0.00464307	0.00485065	0.938609	0.00337323	0.00573443	0.00236179	0.00296589	0.0151578	0.00221897	0.00293932
CWF19L2	Nuclear	N4	0.00594127	0.985407	0.00665118	0.00200024	0.00136227	0.0011006	0.00210838	0.00137001	0.00469811	0.0126459	0.00220241	0.965861	0.00100168	0.00135376	0.00102934	0.00122672	0.00203969	0.000906215	0.00109403
CXADR	Secretory	Unclassified	0.984198	0.00275404	0.00218795	0.0108602	0.528228	0.103045	0.136874	0.21605	0.000813388	0.000785042	0.000726916	0.000428695	0.000448975	0.000416536	0.000452394	0.000436542	0.000433505	0.0104203	0.000439913
CXCL16	Secretory	Unclassified	0.950564	0.018857	0.0198926	0.0106864	0.52363	0.060701	0.251441	0.114793	0.00817567	0.0035731	0.00359013	0.00351808	0.00756576	0.00343536	0.00261445	0.00266886	0.0036082	0.00618565	0.0045007
CXCR4	Secretory	Unclassified	0.93267	0.028033	0.023548	0.0157489	0.478754	0.1707	0.0552278	0.227988	0.00803353	0.00636898	0.00742141	0.0062091	0.00489118	0.00415553	0.00401657	0.00462639	0.00585837	0.0103547	0.0053942
CXorf38	Cytosol	Unclassified	0.00434519	0.00494095	0.988703	0.00201069	0.00118643	0.000924055	0.000928397	0.00130631	0.00121348	0.00113911	0.0012767	0.00131166	0.302625	0.0435436	0.493062	0.0521134	0.0973592	0.000809981	0.00120071
CXorf56	Nuclear	N4	0.00763418	0.963212	0.0264146	0.00273959	0.00233079	0.00169847	0.00158488	0.00202004	0.00191738	0.00329431	0.00247013	0.95553	0.00296829	0.00626332	0.00165885	0.00210853	0.0134156	0.00125626	0.00148332
CXXC1	Nuclear	N4	0.00596107	0.983513	0.00836629	0.00216007	0.00178039	0.00132475	0.00135769	0.00149824	0.00322434	0.0165769	0.00234015	0.961371	0.00133031	0.001854	0.00126312	0.00142946	0.0024894	0.000924824	0.00123524
CYB561	Secretory	S1	0.922463	0.0421425	0.0229783	0.0124166	0.66114	0.0986552	0.053096	0.109572	0.0173805	0.00755258	0.0105347	0.00667472	0.00513656	0.00413362	0.0036931	0.00435546	0.00565951	0.00721766	0.00519894
CYB5B	Secretory	S2	0.960887	0.0030113	0.0035724	0.0325288	0.0343406	0.741731	0.0953413	0.0894745	0.000775614	0.000827126	0.000767426	0.00064113	0.000591622	0.000726868	0.000733793	0.000757363	0.000762753	0.00844126	0.0240876
CYB5R1	Mitochondria	M2	0.0387313	0.00161708	0.00226897	0.957383	0.00721873	0.00724298	0.00222471	0.0220449	0.000363204	0.000462488	0.000422656	0.00036873	0.000425151	0.000452828	0.000489113	0.000441451	0.000460423	0.00705374	0.950329
CYB5R2	Cytosol	Unclassified	0.00389026	0.00577569	0.988677	0.00165662	0.00116965	0.000860552	0.000797602	0.00106246	0.0011636	0.00110566	0.00115392	0.00235252	0.0231774	0.0430388	0.108363	0.201503	0.612595	0.000731053	0.000925572
CYB5R3	Secretory	Unclassified	0.948793	0.00287275	0.00329938	0.0450354	0.0349965	0.696897	0.118826	0.0980731	0.000649887	0.000842596	0.000749006	0.000631266	0.000595291	0.000662198	0.000684134	0.000678232	0.000679523	0.0162213	0.0288141
CYB5R4	Cytosol	Unclassified	0.00393886	0.0048481	0.98954	0.00167336	0.00120368	0.000860334	0.000799647	0.0010752	0.00118932	0.00110938	0.00116544	0.00138396	0.0235327	0.0137588	0.204443	0.428187	0.319618	0.000730487	0.000942874
CYBRD1	Secretory	Unclassified	0.838686	0.00856108	0.0113085	0.141445	0.3223	0.13046	0.255403	0.130523	0.00198861	0.00228554	0.00237364	0.00191329	0.00309283	0.00215553	0.00205578	0.00189998	0.00210442	0.0225053	0.118939
CYC1	Mitochondria	M2	0.0332589	0.00118837	0.00142517	0.964128	0.00909047	0.00336569	0.0026039	0.0181989	0.000258966	0.000403303	0.000319063	0.000207038	0.000236573	0.000271929	0.000315172	0.00031233	0.00028917	0.016665	0.947462
CYCS	Nuclear	N4	0.041181	0.891941	0.0541126	0.0127655	0.0152056	0.00997465	0.00692154	0.00907923	0.0128573	0.0128827	0.0152186	0.850982	0.0107547	0.0126504	0.00644383	0.00871978	0.015544	0.00526961	0.00749584
CYFIP1	Cytosol	C1	0.0245147	0.0211398	0.948049	0.00629644	0.00985683	0.00490646	0.00447395	0.00527742	0.00713861	0.00372727	0.00502718	0.00524678	0.750189	0.117065	0.0387832	0.0144502	0.0275615	0.00217177	0.00412467
CYFIP2	Cytosol	C1	0.0747802	0.0533039	0.860966	0.0109495	0.0347757	0.0126146	0.0133582	0.0140316	0.0291015	0.00653	0.00874997	0.00892249	0.7377	0.0544877	0.026792	0.0143954	0.0275911	0.00403952	0.00690998
CYHR1	Nuclear	N4	0.0102749	0.961626	0.0246869	0.00341237	0.00338556	0.00239915	0.0019409	0.00254929	0.00324146	0.0038486	0.00363177	0.950904	0.0029933	0.0128701	0.00198008	0.00232479	0.00451855	0.00139723	0.00201514
CYLD	Cytosol	Unclassified	0.00297242	0.00295341	0.992558	0.00151626	0.000797284	0.000647359	0.000655917	0.000871861	0.000671197	0.000782331	0.000886904	0.000612977	0.523018	0.350811	0.0891191	0.016356	0.0132532	0.000578581	0.000937684
CYP1B1	Secretory	Unclassified	0.975867	0.0030173	0.00328498	0.0178304	0.427129	0.234063	0.158633	0.156043	0.00062894	0.000933407	0.000874675	0.000580279	0.000715911	0.000618209	0.00066349	0.000642601	0.00064477	0.0147441	0.00308621
CYP20A1	Secretory	Unclassified	0.983022	0.00204116	0.00223222	0.0127048	0.115152	0.576829	0.19257	0.0984718	0.000538129	0.000559878	0.000522101	0.000421055	0.000412016	0.000451986	0.000471491	0.000449249	0.000447482	0.0113703	0.00133444
CYP24A1	Mitochondria	M2	0.224987	0.0470318	0.040403	0.687578	0.0291758	0.0446714	0.0945635	0.0565766	0.00550102	0.0111218	0.0187391	0.0116699	0.0101317	0.010625	0.00644578	0.00535468	0.00784583	0.181213	0.506365
CYP27B1	Secretory	Unclassified	0.951123	0.00577438	0.00621013	0.0368927	0.175626	0.157351	0.518041	0.100105	0.00112203	0.0021708	0.00152276	0.000958788	0.00156503	0.00121405	0.00115637	0.00108321	0.00119148	0.0305141	0.00637858
CYP27C1	Mitochondria	M2	0.0404111	0.00661962	0.00204927	0.95092	0.00995315	0.00311795	0.00252038	0.0248196	0.00101837	0.0022437	0.00298073	0.00037682	0.000362077	0.000396053	0.000430234	0.000427361	0.000433546	0.030115	0.920805
CYP2S1	Secretory	Unclassified	0.941425	0.0331614	0.010272	0.0151414	0.0274814	0.714495	0.124737	0.0747115	0.0104473	0.0158462	0.00387515	0.0029927	0.0025078	0.00200129	0.00174326	0.00184983	0.00216983	0.00563497	0.00950648
CYP2U1	Secretory	Unclassified	0.987056	0.00201237	0.00238435	0.0085469	0.157284	0.561566	0.177279	0.0909274	0.000513777	0.000558107	0.000521749	0.000418737	0.00043328	0.000463762	0.000498454	0.000504326	0.00048453	0.00730336	0.00124354
CYP4F11	Secretory	Unclassified	0.964113	0.0170036	0.00909465	0.00978855	0.0219487	0.612482	0.289561	0.0401217	0.00653946	0.00371053	0.00448332	0.00227031	0.0017031	0.00164454	0.00171321	0.00189556	0.00213824	0.00606437	0.00372419
CYP4V2	Secretory	Unclassified	0.891042	0.0610692	0.0193392	0.02855	0.0376995	0.648025	0.139673	0.065644	0.0179259	0.0307581	0.00635766	0.00602753	0.00464711	0.00371119	0.00310474	0.00352286	0.00435325	0.00825241	0.0202976
CYP51A1	Secretory	S2	0.98025	0.00768281	0.00500304	0.00706459	0.0282599	0.754821	0.145001	0.0521676	0.00269946	0.00250655	0.00123631	0.00124049	0.00116383	0.00101402	0.000906815	0.000896988	0.00102138	0.00478512	0.00227948
CYSRT1	Secretory	Unclassified	0.821303	0.0848174	0.0699943	0.0238849	0.489254	0.121942	0.0567779	0.153329	0.0241004	0.0184917	0.0215815	0.0206439	0.0158231	0.0120967	0.0099672	0.0134933	0.0186139	0.0117909	0.012094
CYSTM1	Secretory	Unclassified	0.975542	0.0103906	0.00371715	0.0103498	0.576688	0.103235	0.134088	0.161531	0.00595096	0.00154606	0.00205209	0.000841466	0.000792476	0.000698397	0.000734394	0.000727787	0.000764095	0.0096175	0.000732281
CYTH1	Cytosol	Unclassified	0.00494026	0.00613319	0.986838	0.00208839	0.00151062	0.00110968	0.000995037	0.00132492	0.00149129	0.00138515	0.00148697	0.00176977	0.0310784	0.014976	0.210288	0.428875	0.301621	0.00090709	0.0011813
CYTH3	Cytosol	Unclassified	0.00386717	0.00604749	0.988445	0.00163993	0.00114984	0.000878594	0.000800521	0.00103822	0.00109815	0.00111182	0.00118346	0.00265406	0.0120887	0.0457787	0.0563419	0.18414	0.690096	0.000736104	0.000903822
D2HGDH	Mitochondria	M1	0.0561984	0.0638145	0.0244273	0.85556	0.00664602	0.00844623	0.0279239	0.0131823	0.00544689	0.0122998	0.0130961	0.0329717	0.00508441	0.00523151	0.00403042	0.00449704	0.00558388	0.822724	0.0328356
DAB2IP	Cytosol	Unclassified	0.0110379	0.00762221	0.976321	0.00501909	0.00309793	0.0024623	0.00240352	0.0030742	0.00161111	0.00176078	0.00215556	0.00209476	0.314665	0.580548	0.045962	0.0111993	0.0239464	0.00149269	0.0035264
DAD1	Secretory	Unclassified	0.893192	0.00437495	0.00364906	0.0987842	0.0577174	0.49971	0.246721	0.0890433	0.000801449	0.00159364	0.00129588	0.000683988	0.00069332	0.000704873	0.000738239	0.000771314	0.000741313	0.0672266	0.0315576
DAG1	Secretory	Unclassified	0.984432	0.0032937	0.00319457	0.00907982	0.48029	0.101093	0.0799503	0.323098	0.000710736	0.00100737	0.000916585	0.000659007	0.000642351	0.000634155	0.000653071	0.000616727	0.000648264	0.00839332	0.000686498
DAGLA	Secretory	Unclassified	0.970949	0.0030845	0.00293411	0.0230326	0.452641	0.175004	0.192693	0.15061	0.000773281	0.000892052	0.000888749	0.000530415	0.000699568	0.000535235	0.000570213	0.000562889	0.000566205	0.021846	0.00118664
DAGLB	Secretory	S1	0.889529	0.0734604	0.0268497	0.0101612	0.638413	0.0466452	0.0944057	0.110065	0.055994	0.00545617	0.00677522	0.00523504	0.00960006	0.00415641	0.00383702	0.00415911	0.00509709	0.00573459	0.00442662
DAP	Cytosol	Unclassified	0.00390353	0.00569936	0.988747	0.00164977	0.00118341	0.000880161	0.000794129	0.00104583	0.00117754	0.00112022	0.00117725	0.00222435	0.0247758	0.0235582	0.114668	0.297311	0.528435	0.000727875	0.000921894
DAP3	Secretory	S3	0.959703	0.0139956	0.00334209	0.0229597	0.0203371	0.100431	0.816066	0.0228687	0.00579294	0.00478023	0.00240679	0.0010156	0.000609315	0.000652102	0.000717713	0.000693669	0.000669291	0.0218523	0.00110733
DAPK1	Secretory	Unclassified	0.966466	0.0180326	0.005434	0.0100678	0.0311156	0.296843	0.612995	0.0255126	0.0097026	0.00274831	0.00420578	0.00137586	0.00102871	0.00102554	0.00107119	0.00112797	0.00118059	0.00835002	0.0017178
DAPK3	Nuclear	N4	0.0203456	0.91259	0.0605406	0.00652375	0.00470142	0.00277942	0.00450853	0.00835623	0.00743832	0.00871436	0.00458386	0.891853	0.00734588	0.0399326	0.00292869	0.00218973	0.0081437	0.0028229	0.00370085
DAPL1	Cytosol	C1	0.0470373	0.060731	0.877338	0.0148932	0.0161174	0.0118032	0.00806405	0.0110527	0.0144653	0.0115811	0.0172813	0.0174032	0.680618	0.0897832	0.0448616	0.0207145	0.041361	0.00530752	0.0095857
DARS	Cytosol	C1	0.0610836	0.131544	0.795558	0.0118144	0.0253278	0.0117662	0.0108787	0.0131109	0.0978017	0.00883862	0.0125062	0.0123973	0.690097	0.0321241	0.0203748	0.0157306	0.0372314	0.00453499	0.00727945
DARS2	Mitochondria	Unclassified	0.0918573	0.264091	0.0324924	0.611559	0.0084523	0.0151005	0.0471591	0.0211454	0.00866186	0.0657459	0.0371241	0.152559	0.0070191	0.00728308	0.00527631	0.0056641	0.00724983	0.564739	0.0468205
DAXX	Nuclear	Unclassified	0.0558185	0.872669	0.0551921	0.0163203	0.0176749	0.0125064	0.0133038	0.0123334	0.225672	0.132647	0.0245441	0.489805	0.0105535	0.00850104	0.00840087	0.010325	0.0174117	0.00639666	0.00992361
DAZAP1	Nuclear	N4	0.0370216	0.882104	0.0713584	0.00951615	0.00913386	0.00618392	0.00555026	0.0161536	0.0304778	0.105937	0.0190007	0.726688	0.0199481	0.0183972	0.00610089	0.00549322	0.021419	0.00372729	0.00578886
DBF4	Nuclear	N4	0.00675259	0.982259	0.00884624	0.00214238	0.00175397	0.00130554	0.00141402	0.00227905	0.00784012	0.0114908	0.00213033	0.960798	0.00153305	0.00237217	0.00113509	0.00136592	0.00244001	0.00103044	0.00111195
DBI	Cytosol	C4	0.0135425	0.0169431	0.964761	0.00475317	0.00460946	0.00312096	0.00250755	0.00330454	0.00411987	0.00338254	0.00435513	0.00508558	0.0244665	0.0191536	0.0531605	0.748198	0.119782	0.00181565	0.00293752
DBN1	Secretory	S3	0.971853	0.00911009	0.0029833	0.016054	0.0345424	0.0872302	0.827371	0.022709	0.0042081	0.00205941	0.00220284	0.000639736	0.000565182	0.000587324	0.000629543	0.000603055	0.000598196	0.0152824	0.000771645
DBNDD1	Cytosol	Unclassified	0.0564637	0.0716963	0.854361	0.0174787	0.0198316	0.0138202	0.00998474	0.0128272	0.0176946	0.0130125	0.0195571	0.0214321	0.0486486	0.0316188	0.0495763	0.557196	0.167322	0.00617647	0.0113022
DBNL	Cytosol	Unclassified	0.00489346	0.00577512	0.987266	0.00206522	0.00149475	0.00108729	0.000996011	0.00131541	0.00146142	0.00135588	0.00143879	0.00151903	0.0300729	0.0170302	0.255769	0.574125	0.110269	0.00089837	0.00116685
DBR1	Nuclear	N4	0.0157479	0.747017	0.23136	0.00587535	0.00507466	0.00338077	0.00313662	0.00415583	0.00545965	0.00599352	0.00569438	0.72987	0.00654922	0.0218009	0.00371072	0.00690552	0.192393	0.00233024	0.00354511
DBT	Secretory	S3	0.964073	0.00609247	0.00282442	0.0270097	0.0184564	0.125409	0.793852	0.0263563	0.00195475	0.00199126	0.00144426	0.000702191	0.000510143	0.000563969	0.000608049	0.000581689	0.000560571	0.0259176	0.0010921
DCAF1	Nuclear	N4	0.0248817	0.872425	0.0962988	0.00639481	0.00737351	0.00405029	0.00425523	0.00920264	0.0407448	0.0119491	0.00644124	0.81329	0.0192683	0.0465424	0.00503242	0.00397181	0.0214839	0.0027876	0.00360721
DCAF10	Cytosol	C2	0.0191861	0.0557676	0.918649	0.00639755	0.00575037	0.00385281	0.00365361	0.00592931	0.00739264	0.00508725	0.00478191	0.0385058	0.0977677	0.680436	0.022713	0.00828045	0.109452	0.00245834	0.00393921
DCAF11	Cytosol	C2	0.00886015	0.0153615	0.972167	0.00361173	0.00249671	0.00198666	0.00183616	0.00254062	0.00309331	0.00263601	0.00277921	0.00685301	0.0718695	0.764613	0.0206996	0.00718461	0.1078	0.00148545	0.00212628
DCAF12	Nuclear	N1	0.0405867	0.908553	0.0435727	0.00728757	0.0150151	0.00671789	0.00861288	0.0102408	0.762527	0.0153842	0.0128192	0.117823	0.0191401	0.00693971	0.00426306	0.0044298	0.00880001	0.00317415	0.00411342
DCAF13	Nuclear	N3	0.00695016	0.986945	0.00374795	0.0023569	0.0015062	0.00163117	0.000933295	0.00287949	0.0371506	0.120225	0.828542	0.00102697	0.000765174	0.000708917	0.000746411	0.000761956	0.000765489	0.00143262	0.000924277
DCAF4	Nuclear	N1	0.020161	0.958025	0.0166486	0.00516555	0.00813932	0.00424594	0.00342476	0.00435098	0.93506	0.00601548	0.0121596	0.00478945	0.00427962	0.00256078	0.00251437	0.00308006	0.00421376	0.00216934	0.00299622
DCAF5	Nuclear	N4	0.00692203	0.940458	0.0502204	0.00239982	0.00190779	0.00141636	0.00133075	0.00226713	0.00275721	0.00352795	0.00234579	0.931827	0.00471962	0.0354826	0.00193867	0.00153183	0.0065477	0.00103455	0.00136527
DCAF7	Cytosol	Unclassified	0.0142992	0.0889572	0.890835	0.00590878	0.00402022	0.00306996	0.00287033	0.0043387	0.00442738	0.00537183	0.00541796	0.0737401	0.0911583	0.572941	0.0192598	0.0125973	0.194878	0.00227792	0.00363086
DCAF8L2	Cytosol	Unclassified	0.108851	0.176928	0.683354	0.0308665	0.0327511	0.0233453	0.0195224	0.0332325	0.0430249	0.0296836	0.0750432	0.0291768	0.480364	0.088156	0.033719	0.0240761	0.0570387	0.00889335	0.0219732
DCBLD1	Secretory	Unclassified	0.986552	0.0011581	0.00179065	0.0104993	0.502924	0.163239	0.141243	0.179145	0.000229034	0.000401176	0.000280707	0.000247185	0.000344561	0.000359854	0.00038651	0.00036178	0.000337949	0.0095813	0.000917964
DCBLD2	Secretory	Unclassified	0.971271	0.00933187	0.00754307	0.0118541	0.519008	0.080018	0.206247	0.165997	0.00320676	0.00226583	0.00224445	0.00161482	0.00188956	0.00135572	0.00134964	0.00139852	0.00154963	0.00944189	0.00241223
DCD	Unclassified	Unclassified	0.166702	0.537017	0.218136	0.0781445	0.0350644	0.0332254	0.0622457	0.0361665	0.0140174	0.0228849	0.0162727	0.483842	0.0275892	0.0815694	0.00828976	0.00750499	0.0931828	0.0460259	0.0321186
DCK	Cytosol	Unclassified	0.0217783	0.0439699	0.926863	0.00738917	0.0074878	0.00511595	0.00398684	0.00518775	0.0068713	0.00564708	0.00737079	0.0240807	0.019695	0.0283441	0.0305663	0.207851	0.640406	0.00274977	0.0046394
DCLK2	Cytosol	Unclassified	0.002489	0.00260408	0.993611	0.00129617	0.000649171	0.000535423	0.000557029	0.00074738	0.000574758	0.00069517	0.000722427	0.000611721	0.59567	0.263067	0.101616	0.0135073	0.0197493	0.000519749	0.000776424
DCLRE1A	Nuclear	N1	0.0173741	0.978773	0.0026195	0.00123321	0.0122996	0.00140951	0.00175604	0.00190896	0.969725	0.00212706	0.00627668	0.00064493	0.000564473	0.000461841	0.000558343	0.000536311	0.000498531	0.000701281	0.00053193
DCLRE1B	Nuclear	N1	0.100075	0.889881	0.00511209	0.00493126	0.0640277	0.00829889	0.0185181	0.0092307	0.854655	0.0201563	0.010874	0.00419582	0.00155511	0.000864213	0.000887447	0.000844866	0.000960456	0.00329421	0.00163704
DCLRE1C	Nuclear	N4	0.0111666	0.881646	0.103006	0.00418128	0.00348058	0.00249329	0.00229563	0.0028971	0.00373934	0.00453759	0.00392129	0.869447	0.00514478	0.0540891	0.00295679	0.00305697	0.0377588	0.00177002	0.00241126
DCN	Secretory	Unclassified	0.645841	0.193305	0.0206388	0.140215	0.0263498	0.0456703	0.519913	0.0539084	0.0179135	0.0748874	0.0206034	0.0799009	0.00527008	0.00430984	0.00333425	0.00324851	0.00447607	0.116513	0.0237018
DCP1A	Cytosol	C2	0.0184923	0.0349254	0.940347	0.00623503	0.0055692	0.00347447	0.00351832	0.00593029	0.00659714	0.00443818	0.00428367	0.0196064	0.142689	0.634306	0.0248763	0.00812911	0.130346	0.00222513	0.0040099
DCP1B	Cytosol	C2	0.0112415	0.0202156	0.964168	0.0043747	0.00329888	0.00240583	0.00230671	0.00323005	0.00345123	0.0029693	0.00309262	0.0107024	0.0866004	0.720675	0.0255566	0.00734277	0.123994	0.00170005	0.00267465
DCP2	Nuclear	N1	0.0371892	0.937967	0.0212346	0.00360894	0.0171747	0.00454304	0.00841077	0.00706073	0.917492	0.00617904	0.00646036	0.00783555	0.0114681	0.00265937	0.00204522	0.00204317	0.00301874	0.00168794	0.00192099
DCPS	Nuclear	N4	0.00905048	0.943706	0.043914	0.00332981	0.00279781	0.00201817	0.00200572	0.00222878	0.00217137	0.00349415	0.00292755	0.935113	0.0032317	0.00819156	0.00213926	0.00266765	0.0276838	0.00149206	0.00183776
DCTD	Cytosol	Unclassified	0.00809236	0.0135423	0.975359	0.00300591	0.00268343	0.00184212	0.00153573	0.00203109	0.00246563	0.00213418	0.0025601	0.00638235	0.0160246	0.0308942	0.0303868	0.200999	0.697055	0.0012032	0.00180271
DCTN1	Cytosol	C1	0.00294322	0.00359704	0.992036	0.00142423	0.000797261	0.000673169	0.000607092	0.000865693	0.000852371	0.000912559	0.000974412	0.0008577	0.858869	0.0359072	0.0772317	0.0140311	0.00599646	0.000606834	0.0008174
DCTN2	Cytosol	C1	0.00437452	0.00520996	0.988511	0.00190455	0.00125111	0.000978019	0.000892808	0.00125257	0.00132272	0.00123097	0.00132374	0.00133253	0.776228	0.0205398	0.156533	0.0212321	0.0139782	0.00078049	0.00112406
DCTN3	Cytosol	C1	0.00340905	0.00427671	0.990746	0.00156804	0.000970476	0.00079935	0.000703571	0.00093565	0.000963103	0.00103936	0.00112962	0.00114463	0.84892	0.0679967	0.0513712	0.00931671	0.0131417	0.000672557	0.000895481
DCTN4	Cytosol	C1	0.00281867	0.00351338	0.992298	0.00136955	0.00076153	0.000670665	0.000575019	0.00081146	0.000775393	0.000908018	0.000950146	0.000879825	0.775359	0.144783	0.0491951	0.00810034	0.0148612	0.000610443	0.000759109
DCTN5	Cytosol	C1	0.00998279	0.00789948	0.978372	0.00374546	0.00337489	0.00201257	0.00210866	0.00248667	0.00245687	0.00158999	0.0020318	0.00182082	0.715822	0.188407	0.0409139	0.011533	0.0216963	0.00115163	0.00259383
DCTPP1	Cytosol	Unclassified	0.00347395	0.0040212	0.990979	0.00152591	0.00100803	0.000746449	0.000725848	0.000993623	0.00103514	0.000956246	0.00101248	0.00101734	0.103894	0.0152907	0.57101	0.177263	0.12352	0.000658785	0.000867121
DCUN1D1	Cytosol	Unclassified	0.0330699	0.0808287	0.874695	0.0114062	0.0107916	0.00799165	0.00632721	0.00795949	0.0100212	0.00834545	0.0106932	0.0517688	0.0361967	0.0253004	0.0248804	0.0616433	0.726674	0.00438883	0.00701739
DCUN1D3	Secretory	Unclassified	0.973693	0.0048721	0.00398045	0.017454	0.455279	0.108587	0.130051	0.279776	0.0012344	0.00140682	0.00134755	0.000883332	0.000770628	0.000777771	0.00082517	0.000789772	0.000817108	0.0163177	0.00113628
DCUN1D5	Nuclear	N4	0.0126695	0.957036	0.0254434	0.00485121	0.00410324	0.00287598	0.00254484	0.00314542	0.0036024	0.00470352	0.00453174	0.944198	0.00349395	0.0103687	0.00237081	0.00283493	0.00637503	0.00210698	0.00274423
DCXR	Unclassified	Unclassified	0.111692	0.520665	0.130574	0.237069	0.0231942	0.025065	0.02101	0.0424229	0.0223717	0.0931563	0.0767642	0.328373	0.0320333	0.0391172	0.0149069	0.0178651	0.0266514	0.180609	0.0564598
DDA1	Nuclear	N4	0.00741146	0.946288	0.0437161	0.00258457	0.00213004	0.0016213	0.00146911	0.00219101	0.00453449	0.00485367	0.00246071	0.934439	0.00536715	0.0286326	0.00204304	0.00209356	0.00557975	0.00116062	0.00142394
DDAH1	Cytosol	Unclassified	0.0057972	0.00892218	0.982714	0.0025663	0.00162704	0.00134065	0.00126801	0.0015615	0.00158939	0.00168023	0.00175617	0.00389639	0.0351778	0.495379	0.0346478	0.0169456	0.400564	0.00113281	0.00143349
DDAH2	Cytosol	C2	0.00949446	0.0129097	0.97349	0.00410584	0.00273117	0.00223691	0.00198592	0.00254046	0.00270473	0.0028823	0.00309913	0.00422355	0.0932118	0.75971	0.0373208	0.00726444	0.0759832	0.00177275	0.00233309
DDB1	Nuclear	N4	0.0143757	0.726005	0.254857	0.00476175	0.00408195	0.00303818	0.00286936	0.00438626	0.00591528	0.00672114	0.00490644	0.708462	0.014485	0.173996	0.0057279	0.00467685	0.055972	0.00191077	0.00285098
DDB2	Nuclear	N4	0.0618275	0.819164	0.100445	0.018563	0.0206586	0.0132237	0.0103666	0.0175786	0.133648	0.031383	0.0241035	0.63003	0.0154736	0.0257188	0.0104821	0.0137487	0.035022	0.00678027	0.0117827
DDHD1	Cytosol	C1	0.0079699	0.00723757	0.981841	0.00295186	0.00250831	0.00176444	0.00163455	0.0020626	0.00195554	0.0015693	0.00190362	0.00180911	0.690633	0.22036	0.044032	0.0126186	0.0141973	0.00103767	0.00191419
DDI2	Cytosol	Unclassified	0.00586073	0.00763549	0.983936	0.00256772	0.00164901	0.00139173	0.00128402	0.00153597	0.00154947	0.00159238	0.00170274	0.0027909	0.0687218	0.269555	0.135987	0.0261079	0.483565	0.00114845	0.00141927
DDOST	Secretory	S2	0.977538	0.00246544	0.00290595	0.0170911	0.0212214	0.770347	0.116458	0.0695109	0.000652974	0.000663555	0.000594223	0.000554685	0.00052347	0.000597032	0.000601503	0.00058755	0.000596396	0.00647825	0.0106128
DDR1	Secretory	Unclassified	0.971415	0.0103586	0.00884405	0.00938255	0.532941	0.0925373	0.216354	0.129583	0.00426142	0.00205824	0.00215028	0.00188862	0.00240287	0.0015566	0.0015401	0.00158007	0.00176441	0.00746829	0.00191426
DDRGK1	Secretory	Unclassified	0.968506	0.00268023	0.00299569	0.0258182	0.102542	0.594663	0.150627	0.120674	0.000606944	0.00076621	0.000710118	0.000596955	0.000544894	0.000595212	0.000619724	0.000614607	0.000621252	0.0157766	0.0100416
DDX1	Nuclear	N4	0.00895033	0.923887	0.0641442	0.00301878	0.00251456	0.00179928	0.00170329	0.0029332	0.00479663	0.00439599	0.00290021	0.911794	0.00558024	0.0464943	0.0025408	0.00195183	0.00757702	0.00130076	0.00171802
DDX10	Nuclear	N3	0.0102132	0.977845	0.00749357	0.00444791	0.00226282	0.0015776	0.00117265	0.00520009	0.0182518	0.101651	0.855592	0.0023505	0.0014909	0.00133937	0.00132623	0.00150643	0.00183064	0.0030618	0.0013861
DDX17	Nuclear	N4	0.0101318	0.970527	0.0155657	0.00377563	0.00262604	0.00195067	0.00198025	0.00357484	0.00573211	0.0717958	0.00501844	0.887981	0.00260063	0.00479317	0.001907	0.00187167	0.00439324	0.00177385	0.00200178
DDX18	Nuclear	N3	0.00733671	0.98545	0.00498059	0.00223289	0.00127821	0.00099725	0.000695858	0.00436539	0.0375318	0.0925332	0.853903	0.00148189	0.00103709	0.000939045	0.000945001	0.000982684	0.00107677	0.00137473	0.00085816
DDX20	Unclassified	Unclassified	0.431614	0.531623	0.0289215	0.00784176	0.346401	0.0225327	0.0273153	0.035365	0.512304	0.00586794	0.00855922	0.00489184	0.0131393	0.00366572	0.00339156	0.00375671	0.00496822	0.00412481	0.00371695
DDX21	Nuclear	N3	0.00778645	0.984008	0.00574399	0.00246155	0.00167964	0.00129295	0.000853082	0.00396078	0.0470263	0.105844	0.829266	0.00187172	0.00123409	0.00109345	0.00107233	0.00110484	0.00123928	0.00140515	0.0010564
DDX23	Nuclear	N1	0.00293326	0.993342	0.00290022	0.000824582	0.00132703	0.000440173	0.000604859	0.000561204	0.983235	0.00503049	0.00357511	0.00150142	0.000444461	0.000556282	0.000674921	0.000631961	0.000592598	0.000423899	0.000400682
DDX24	Nuclear	N1	0.00977744	0.980561	0.00694037	0.00272152	0.0037925	0.00195481	0.00192263	0.00210749	0.716276	0.0092297	0.253024	0.00203108	0.00146857	0.00130478	0.00130786	0.00129652	0.00156263	0.00154494	0.00117658
DDX27	Nuclear	N3	0.0222686	0.962654	0.00986966	0.00520782	0.00465362	0.00441922	0.00260297	0.0105928	0.0909234	0.109222	0.759176	0.00333256	0.0021791	0.0018839	0.00176167	0.00186501	0.00217998	0.00258533	0.00262249
DDX28	Secretory	Unclassified	0.905872	0.054166	0.0249492	0.0150132	0.33817	0.130366	0.35037	0.0869657	0.0341786	0.00838279	0.00874282	0.00286181	0.0135295	0.00304473	0.00278009	0.0025301	0.00306477	0.00976957	0.00524362
DDX31	Nuclear	Unclassified	0.0246478	0.96493	0.00692885	0.00349303	0.00699624	0.00416209	0.00363641	0.00985306	0.318774	0.0204601	0.624074	0.0016225	0.00159059	0.00130676	0.00127593	0.00130432	0.00145124	0.00202336	0.00146967
DDX39A	Nuclear	N2	0.00333829	0.989568	0.00450938	0.00258433	0.00075058	0.000718377	0.000584734	0.0012846	0.00298456	0.943902	0.0253818	0.0173002	0.000917762	0.000955295	0.000863839	0.000825136	0.00094735	0.00148963	0.0010947
DDX39B	Nuclear	Unclassified	0.0112646	0.967899	0.0127512	0.00808531	0.0023908	0.00233006	0.00172687	0.00481682	0.00819188	0.851116	0.0786805	0.0299107	0.00287252	0.00278794	0.00201941	0.00213089	0.00294047	0.00455871	0.0035266
DDX41	Nuclear	Unclassified	0.0242542	0.958855	0.00905774	0.00783304	0.00478116	0.00418027	0.00760362	0.00768919	0.0498853	0.784516	0.0400982	0.0843552	0.00219902	0.00168739	0.00161946	0.00147582	0.00207604	0.00473433	0.00309871
DDX42	Nuclear	N4	0.00537798	0.975553	0.017176	0.00189295	0.0014276	0.00103326	0.000991028	0.00192609	0.00158614	0.00495787	0.00198732	0.967022	0.00218851	0.0102451	0.00111419	0.00108767	0.00254048	0.000821069	0.00107188
DDX46	Nuclear	N4	0.00538175	0.985615	0.00716136	0.00184226	0.00136496	0.00104636	0.00135364	0.00161679	0.00285495	0.00645066	0.00180937	0.9745	0.00104455	0.00235152	0.000928009	0.00106474	0.00177254	0.00085159	0.000990674
DDX47	Nuclear	N1	0.101758	0.877417	0.0104062	0.0104187	0.0480246	0.0187498	0.0209332	0.0140502	0.693876	0.0431883	0.137706	0.00264662	0.00262031	0.00191884	0.00189303	0.00189059	0.00208345	0.00711516	0.0033035
DDX49	Secretory	Unclassified	0.543515	0.395871	0.0143786	0.0462353	0.0214635	0.0241326	0.474353	0.0235658	0.0962769	0.218217	0.0337738	0.0476039	0.00312638	0.00283016	0.00262409	0.00263909	0.00315889	0.0361691	0.0100662
DDX5	Nuclear	N1	0.0347756	0.955817	0.00443081	0.00497684	0.0185671	0.00467926	0.00875588	0.00277332	0.823089	0.0757955	0.0540675	0.00286503	0.000856505	0.000872911	0.000932914	0.000856167	0.000912314	0.00359222	0.00138462
DDX50	Nuclear	N3	0.00403744	0.991066	0.00349092	0.00140572	0.00110153	0.000806798	0.000566225	0.00156289	0.053397	0.0665325	0.870207	0.000929187	0.000719905	0.000667911	0.000695479	0.000698583	0.00070904	0.000864631	0.000541093
DDX51	Nuclear	N3	0.0114507	0.978645	0.00619364	0.0037109	0.00189285	0.00143656	0.00105393	0.00706734	0.0265906	0.0935605	0.856606	0.00188805	0.00124125	0.00113107	0.00115598	0.00124813	0.00141722	0.00236798	0.00134292
DDX52	Nuclear	Unclassified	0.0584558	0.911937	0.0158797	0.0137271	0.00884592	0.0178041	0.00818667	0.0236192	0.117739	0.123211	0.666208	0.0047789	0.00321556	0.00291524	0.00299004	0.00315286	0.00360603	0.00626618	0.00746093
DDX54	Nuclear	N3	0.00689691	0.98431	0.0060319	0.00276136	0.00184749	0.00137371	0.000985922	0.00268978	0.0268185	0.124298	0.831041	0.00215188	0.00117372	0.00107384	0.0011533	0.00123762	0.00139343	0.0016756	0.00108576
DDX55	Nuclear	N1	0.0423657	0.932044	0.018676	0.00691391	0.0181554	0.0109713	0.00614696	0.00709208	0.898739	0.00850354	0.0192501	0.00555199	0.00398982	0.0031252	0.00310762	0.00368025	0.00477307	0.00292469	0.00398921
DDX56	Nuclear	Unclassified	0.0636505	0.911539	0.0136996	0.0111111	0.020131	0.0176262	0.012803	0.0130904	0.120582	0.0531002	0.733983	0.00387307	0.00294567	0.0025857	0.00251272	0.00263558	0.00301993	0.00656439	0.00454673
DDX58	Cytosol	Unclassified	0.00325282	0.00370612	0.991582	0.00145932	0.00093096	0.000698876	0.000683103	0.000939886	0.000950141	0.000892143	0.000941806	0.000922026	0.126993	0.0111269	0.668184	0.12948	0.0557983	0.000625824	0.0008335
DDX59	Unclassified	Unclassified	0.0357986	0.47766	0.472854	0.0136873	0.0103377	0.00656341	0.00710504	0.0117925	0.00984839	0.00984905	0.00990264	0.44806	0.0494377	0.327361	0.0165393	0.00954294	0.0699726	0.0049151	0.0087722
DDX60	Unclassified	Unclassified	0.0509365	0.38517	0.550258	0.0136357	0.015317	0.00849567	0.00923228	0.0178915	0.0515552	0.0156933	0.0123002	0.305621	0.129799	0.288038	0.0190967	0.0117722	0.101552	0.00510032	0.00853539
DDX60L	Nuclear	N1	0.0438586	0.94301	0.0093363	0.00379536	0.0260262	0.00458003	0.00517808	0.00807433	0.925454	0.0033149	0.0118983	0.00234284	0.00260021	0.00152527	0.0015574	0.00170227	0.00195114	0.00196775	0.00182761
DECR1	Mitochondria	M1	0.105384	0.0860228	0.0166732	0.79192	0.00439646	0.0108797	0.0756801	0.014428	0.00389756	0.026291	0.0168221	0.0390121	0.00344466	0.00357453	0.00301516	0.00304791	0.0035909	0.753108	0.0388119
DECR2	Secretory	Unclassified	0.886759	0.015973	0.00600053	0.0912672	0.0378652	0.0716083	0.732625	0.0446607	0.00302933	0.00613929	0.00293093	0.00387342	0.00118496	0.00117719	0.00120633	0.00117973	0.00125232	0.087601	0.00366622
DEF6	Nuclear	Unclassified	0.0280659	0.943608	0.0126468	0.0156794	0.00531521	0.00407289	0.00676863	0.0119091	0.0300114	0.275448	0.626524	0.0116243	0.00293843	0.00252091	0.00209238	0.00205887	0.00303626	0.00885541	0.00682404
DEF8	Cytosol	C2	0.0211134	0.0232934	0.947776	0.00781741	0.00666929	0.00493305	0.00422046	0.00529061	0.00445081	0.00409482	0.00481582	0.00993195	0.13933	0.67675	0.0454361	0.0120087	0.0742511	0.00299898	0.00481843
DEK	Nuclear	N4	0.00831579	0.936562	0.052547	0.00257567	0.00215051	0.0015014	0.00146807	0.00319581	0.00589292	0.00526131	0.00257148	0.922836	0.00502609	0.0362683	0.00215334	0.00161503	0.00748422	0.00111538	0.00146029
DENND1A	Cytosol	Unclassified	0.00758926	0.00866251	0.980469	0.00327901	0.00224303	0.00164952	0.00158191	0.00211481	0.00217554	0.00198141	0.0023709	0.00213466	0.575384	0.0691151	0.282147	0.0441642	0.00965849	0.00118485	0.00209416
DENND2D	Secretory	Unclassified	0.911333	0.0518299	0.0259789	0.0108582	0.559404	0.0633086	0.144544	0.144077	0.035008	0.00546396	0.00613366	0.00522426	0.00920445	0.00406452	0.00367631	0.00399627	0.0050374	0.00602879	0.00482937
DENND3	Cytosol	C1	0.00358434	0.00411392	0.990597	0.00170476	0.000972743	0.000774222	0.000762982	0.00107439	0.00104448	0.00102546	0.00114633	0.000897648	0.700623	0.0449896	0.207224	0.0314378	0.00632232	0.000666186	0.00103858
DENND4A	Cytosol	C1	0.0103327	0.0102214	0.975598	0.00384756	0.00345067	0.00223451	0.00207724	0.00257028	0.0027265	0.002172	0.00273636	0.00258651	0.737664	0.1493	0.0574391	0.0175316	0.0136634	0.00135321	0.00249435
DENND4B	Cytosol	Unclassified	0.0727788	0.0433125	0.861888	0.0220204	0.0235902	0.0123434	0.0143685	0.0224767	0.0110346	0.00739874	0.00970561	0.0151735	0.413661	0.327308	0.0386917	0.0137471	0.0684803	0.00562238	0.0163981
DENND4C	Cytosol	C1	0.0028406	0.00310152	0.992635	0.00142337	0.000759985	0.000631077	0.00061033	0.000839204	0.000693589	0.000797009	0.000867646	0.000743273	0.705893	0.191756	0.0710158	0.010954	0.0130157	0.000577111	0.00084626
DENND5B	Cytosol	C1	0.00493724	0.00571337	0.987056	0.0022936	0.00133814	0.00105766	0.0010621	0.00147934	0.00149035	0.00136074	0.00165721	0.00120507	0.710812	0.0591494	0.173024	0.0365458	0.00752494	0.000840971	0.00145263
DENND6A	Cytosol	C2	0.00318945	0.00365079	0.991529	0.0016309	0.00085319	0.0006954	0.000720986	0.00091987	0.000757069	0.000935117	0.000879948	0.00107865	0.204456	0.65647	0.0617242	0.00648543	0.0623938	0.000704235	0.00092666
DENND6B	Cytosol	Unclassified	0.0481808	0.0353643	0.905697	0.0107575	0.0199013	0.00935856	0.00823406	0.0106869	0.0121015	0.00614986	0.00778571	0.00932723	0.582735	0.213019	0.0498628	0.0184641	0.0416173	0.00361641	0.0071411
DENR	Cytosol	Unclassified	0.0222004	0.0280803	0.94218	0.00753946	0.00766443	0.00518821	0.00403236	0.00531542	0.00685682	0.00540366	0.00727428	0.00854556	0.0261914	0.0226487	0.0940292	0.562706	0.236605	0.00279521	0.00474425
DEPDC1B	Secretory	Unclassified	0.86137	0.0542993	0.0691908	0.0151394	0.590881	0.0737425	0.0911564	0.105591	0.0221218	0.00914251	0.0124753	0.0105597	0.03329	0.0087707	0.00751979	0.00836238	0.0112479	0.00819299	0.00694642
DEPDC5	Cytosol	Unclassified	0.00949904	0.0129165	0.973923	0.00366182	0.00270339	0.00208044	0.0018609	0.00285431	0.00317123	0.00278691	0.00280307	0.0041553	0.244258	0.621025	0.0300805	0.00849594	0.0700641	0.00150667	0.00215515
DEPTOR	Cytosol	C2	0.00762231	0.0066011	0.982247	0.00352934	0.00215356	0.00166183	0.00164288	0.00216404	0.0012272	0.00159562	0.00152714	0.00225114	0.169061	0.738113	0.0424024	0.00893098	0.023739	0.00131046	0.00221888
DERA	Cytosol	Unclassified	0.0855473	0.161751	0.730501	0.0222006	0.0346995	0.0186686	0.0138067	0.0183725	0.0916546	0.0174512	0.0284444	0.024201	0.566718	0.045948	0.031274	0.0241731	0.0623881	0.0075944	0.0146062
DERL2	Secretory	Unclassified	0.959012	0.0212338	0.00860145	0.011153	0.0583232	0.711768	0.116651	0.0722697	0.00629335	0.0099355	0.0025094	0.00249551	0.00209752	0.00172295	0.00144527	0.00152318	0.00181252	0.00623664	0.00491641
DES	Secretory	Unclassified	0.835335	0.115283	0.011761	0.0376216	0.0508588	0.0784663	0.674852	0.0311576	0.0482307	0.021417	0.042553	0.00308178	0.00250856	0.00227187	0.00218644	0.00227288	0.00252121	0.031145	0.00647661
DESI1	Cytosol	Unclassified	0.022503	0.0270961	0.942277	0.00812379	0.00715177	0.00552247	0.00443172	0.00539708	0.00665667	0.00553106	0.00716233	0.00774601	0.0877366	0.025954	0.450893	0.265814	0.11188	0.00319801	0.00492577
DESI2	Secretory	Unclassified	0.979458	0.0053715	0.00307393	0.0120961	0.509386	0.116937	0.222915	0.13022	0.00225882	0.00124533	0.00121747	0.000649881	0.000672528	0.000574425	0.000602226	0.000603312	0.000621441	0.0112957	0.000800399
DFFA	Cytosol	Unclassified	0.00625816	0.0205369	0.970692	0.00251322	0.00190119	0.00140333	0.00126242	0.00169122	0.00181038	0.00177127	0.00191583	0.0150394	0.0544742	0.0299786	0.0402531	0.0991437	0.746842	0.00108256	0.00143066
DFFB	Unclassified	N4	0.0119601	0.653086	0.33057	0.00438378	0.00331513	0.00241754	0.00247719	0.00375028	0.00410053	0.00505342	0.0041952	0.639737	0.01525	0.155735	0.00551037	0.00599852	0.148076	0.00173257	0.00265121
DGAT1	Secretory	Unclassified	0.929583	0.00350254	0.00262195	0.0642923	0.0796885	0.462815	0.288948	0.0981312	0.000570856	0.00133892	0.00117604	0.000416726	0.000473806	0.000509845	0.000550502	0.000569444	0.000518349	0.0528077	0.0114845
DGCR2	Secretory	Unclassified	0.874387	0.0181853	0.0275729	0.0798549	0.261536	0.103605	0.362914	0.146331	0.00431231	0.005578	0.00564091	0.00265409	0.0122737	0.00504382	0.00367339	0.00285753	0.00372452	0.0180352	0.0618197
DGCR6L	Cytosol	Unclassified	0.0108162	0.015795	0.968923	0.00446634	0.00242698	0.0022004	0.00207836	0.00411043	0.00274505	0.00377327	0.00651155	0.00276513	0.507486	0.358627	0.0421315	0.0290052	0.0316728	0.00138339	0.00308294
DGCR8	Nuclear	N1	0.0149452	0.972247	0.00937185	0.00343566	0.00582631	0.00295968	0.00248863	0.00367061	0.947036	0.00412571	0.018286	0.00279955	0.00188213	0.00162171	0.00165776	0.00190572	0.00230453	0.00156498	0.00187068
DGKA	Cytosol	Unclassified	0.00295093	0.0032457	0.992386	0.00141739	0.000809857	0.000646128	0.000635737	0.000859208	0.000746427	0.000835528	0.000846724	0.000817026	0.528187	0.177881	0.235324	0.0168785	0.0341147	0.000607067	0.000810325
DGKE	Secretory	Unclassified	0.948783	0.0297528	0.010688	0.0107761	0.0980889	0.674241	0.0888591	0.0875938	0.00763851	0.0156318	0.00325793	0.00322454	0.00262822	0.00211333	0.00174948	0.00190644	0.00229051	0.00615397	0.00462209
DGKH	Cytosol	Unclassified	0.00582236	0.00701881	0.984765	0.00239392	0.00181833	0.0012649	0.00112046	0.00161868	0.00177015	0.00162197	0.00172517	0.00190152	0.177142	0.0309415	0.644248	0.115185	0.0172483	0.000991668	0.00140226
DGKQ	Cytosol	Unclassified	0.0435832	0.0558654	0.886565	0.0139862	0.0150612	0.0105078	0.00780944	0.0102048	0.0137964	0.0103819	0.0149223	0.0167648	0.0327373	0.0219008	0.0568585	0.542875	0.232193	0.00495204	0.00903417
DGKZ	Cytosol	Unclassified	0.0204556	0.0330584	0.939282	0.00720434	0.00611516	0.00485322	0.00404792	0.00543928	0.0071739	0.00584854	0.00668839	0.0133475	0.182482	0.616391	0.0334101	0.013877	0.0931213	0.00283906	0.00436528
DGLUCY	Mitochondria	M1	0.090126	0.156802	0.0464199	0.706652	0.0131408	0.0195364	0.0363811	0.0210677	0.0140153	0.0205795	0.0318324	0.0903746	0.00965078	0.00857857	0.00714973	0.00879528	0.0122455	0.674111	0.0325415
DHCR24	Secretory	S2	0.984384	0.00210611	0.00254518	0.0109646	0.0342878	0.746345	0.140308	0.0634433	0.000508422	0.000589809	0.0005234	0.000484475	0.000441818	0.000508795	0.000536709	0.000533667	0.000524193	0.00733841	0.0036262
DHCR7	Secretory	S2	0.982209	0.00362064	0.00316654	0.0110036	0.0182299	0.750239	0.157469	0.0562719	0.00128395	0.000924383	0.000746068	0.000666233	0.000660875	0.000668503	0.000619838	0.000588904	0.000628416	0.0049644	0.00603924
DHDDS	Secretory	Unclassified	0.988341	0.00164121	0.00208994	0.00792814	0.0515842	0.648485	0.230873	0.0573989	0.00047602	0.000429305	0.00037742	0.00035847	0.000335911	0.00042955	0.000452696	0.000443137	0.000428647	0.00666753	0.00126061
DHFR	Cytosol	Unclassified	0.0057912	0.0085495	0.983343	0.00231585	0.00184337	0.00130388	0.0011384	0.00150555	0.00172952	0.00158036	0.00177214	0.00346748	0.0171463	0.024078	0.0397198	0.286066	0.616333	0.000979549	0.0013363
DHODH	Mitochondria	M2	0.0372374	0.00164227	0.0020993	0.959021	0.00730919	0.00678522	0.0025542	0.0205888	0.000363521	0.000501605	0.000450453	0.000326695	0.000382529	0.000413719	0.000457912	0.000417037	0.000428106	0.012507	0.946514
DHPS	Cytosol	C5	0.00346784	0.00634645	0.988673	0.00151227	0.000998494	0.0007822	0.000726473	0.000960677	0.000992956	0.00102418	0.0010568	0.00327251	0.0143992	0.0636004	0.0340323	0.106959	0.769682	0.000685646	0.000826619
DHRS1	Secretory	Unclassified	0.944171	0.00299306	0.00393872	0.0488971	0.043246	0.668096	0.125036	0.107794	0.00068552	0.000841456	0.000724051	0.000742029	0.000732549	0.000800153	0.000807431	0.0007887	0.000809889	0.013831	0.0350661
DHRS11	Cytosol	Unclassified	0.00465462	0.00518781	0.98793	0.00222769	0.00130844	0.00104638	0.00100236	0.00129744	0.0012144	0.00123257	0.00153283	0.00120802	0.510293	0.284351	0.137519	0.0368686	0.0188982	0.000843457	0.00138423
DHRS13	Secretory	S2	0.973338	0.00924594	0.0072774	0.0101386	0.0307187	0.744751	0.133109	0.0647595	0.00248759	0.00321236	0.00182505	0.00172094	0.0015011	0.00144226	0.00136646	0.00140077	0.0015668	0.00492111	0.00521748
DHRS4	Secretory	Unclassified	0.573928	0.0870394	0.0126966	0.326336	0.00798434	0.0312871	0.506085	0.0285717	0.00749068	0.0448342	0.0193735	0.015341	0.0025611	0.00260827	0.00243959	0.00241288	0.00267476	0.306073	0.0202629
DHRS7	Secretory	Unclassified	0.985673	0.00333446	0.00275679	0.00823572	0.01541	0.68945	0.244142	0.0366709	0.00110883	0.000828793	0.000854032	0.000542804	0.000469275	0.00054902	0.000581622	0.000582977	0.0005739	0.00621979	0.00201593
DHRS7B	Secretory	Unclassified	0.965186	0.00858674	0.00756262	0.0186643	0.0620495	0.707278	0.104071	0.0917887	0.00242511	0.00261458	0.00176562	0.00178143	0.00162611	0.00148673	0.00139781	0.00142834	0.00162362	0.00543477	0.0132295
DHRSX	Secretory	S2	0.981801	0.00507359	0.00365748	0.00946803	0.0088293	0.752227	0.185217	0.0355268	0.00213425	0.00109552	0.00104445	0.000799379	0.000699674	0.000759709	0.000724135	0.000714503	0.000759458	0.00499603	0.00447201
DHTKD1	Nuclear	N4	0.0542786	0.751989	0.0285139	0.165218	0.00675073	0.008645	0.0231755	0.0157074	0.00828974	0.108548	0.0443092	0.590843	0.00613147	0.00680572	0.00424152	0.00458845	0.00674673	0.138426	0.0267917
DHX15	Nuclear	Unclassified	0.0256642	0.947378	0.0167068	0.0102506	0.00476473	0.00388073	0.00546404	0.0115547	0.0359015	0.735486	0.0477704	0.128221	0.0043168	0.00342585	0.00255162	0.00229524	0.00411727	0.00558065	0.00466993
DHX16	Nuclear	N4	0.0051303	0.976127	0.0170193	0.00172341	0.00130788	0.000940299	0.000974135	0.00190799	0.00193466	0.00431654	0.00172119	0.968155	0.00183763	0.0109354	0.00103036	0.000942478	0.00227346	0.000761518	0.000961891
DHX29	Cytosol	Unclassified	0.0643101	0.211203	0.708305	0.0161821	0.0221458	0.011924	0.0108854	0.0193549	0.107393	0.0156272	0.0161806	0.0720022	0.32342	0.190269	0.0267732	0.0170878	0.150755	0.00600272	0.0101793
DHX30	Secretory	Unclassified	0.974936	0.00847705	0.00369325	0.0128936	0.127099	0.183837	0.62526	0.0387402	0.00430139	0.00142979	0.00197822	0.00076764	0.000729534	0.000717847	0.000744768	0.000736643	0.000764456	0.011924	0.000969596
DHX32	Cytosol	C1	0.00289973	0.00319771	0.992466	0.0014363	0.000776033	0.000636992	0.000625509	0.000861195	0.000766786	0.000824083	0.000898011	0.000708829	0.758564	0.10125	0.108053	0.0183586	0.00624059	0.000578175	0.000858126
DHX33	Nuclear	N3	0.00325957	0.990828	0.00306498	0.00284772	0.000863281	0.000527684	0.000447371	0.00142123	0.010365	0.152598	0.826878	0.000986176	0.000565627	0.000585864	0.000637977	0.000627998	0.000647515	0.00218691	0.000660806
DHX34	Nuclear	N4	0.0132238	0.974054	0.00791936	0.00480319	0.00220852	0.00161253	0.00496143	0.00444137	0.00571469	0.0288444	0.00330019	0.936194	0.00150816	0.0022721	0.00102449	0.00113855	0.00197606	0.00265244	0.00215075
DHX35	Cytosol	Unclassified	0.0648921	0.164701	0.737434	0.0329733	0.015589	0.0119427	0.0107784	0.026582	0.0136249	0.0309836	0.0531256	0.0669665	0.255167	0.346298	0.0290282	0.0189377	0.0880032	0.0104079	0.0225654
DHX36	Nuclear	N1	0.042773	0.928967	0.0234916	0.00476853	0.017927	0.00545304	0.00663354	0.0127595	0.912004	0.00427847	0.010029	0.00265557	0.0131441	0.00248964	0.00238146	0.00226406	0.00321229	0.00208704	0.00268149
DHX37	Nuclear	N1	0.0065378	0.99006	0.0023355	0.001067	0.00414617	0.000839002	0.000921827	0.000630803	0.968631	0.00234962	0.0185961	0.000482807	0.000392627	0.00048112	0.000529579	0.000472114	0.000460064	0.000646827	0.000420174
DHX38	Nuclear	N4	0.00391287	0.987526	0.00704099	0.00151984	0.00100328	0.000723528	0.00088948	0.00129658	0.00151815	0.00466386	0.00142001	0.979924	0.000935661	0.00329043	0.00070571	0.000774411	0.00133478	0.000683887	0.000835954
DHX40	Nuclear	N4	0.00569327	0.980289	0.0120658	0.00195225	0.00129224	0.000883955	0.00131532	0.00220176	0.00270037	0.00603312	0.00163611	0.969919	0.00142725	0.00698812	0.000880802	0.000844491	0.00192517	0.000930002	0.00102225
DHX57	Nuclear	N1	0.0200675	0.963409	0.0127503	0.00377357	0.0104148	0.00287741	0.00287851	0.00389683	0.947271	0.00468412	0.00882416	0.00262931	0.00455178	0.00184307	0.00168177	0.00195814	0.00271552	0.00179878	0.00197479
DHX8	Nuclear	N4	0.00658322	0.984548	0.00612257	0.00274614	0.00133385	0.00104243	0.00245281	0.00175414	0.00371287	0.0799265	0.00383034	0.897078	0.000994949	0.00141668	0.00099211	0.00107921	0.00163963	0.00135934	0.00138681
DIABLO	Nuclear	N4	0.0384897	0.795334	0.0211743	0.145002	0.00534659	0.00535168	0.0182112	0.00958028	0.00638008	0.0759492	0.0191463	0.693858	0.00430234	0.00550949	0.00326007	0.00338925	0.00471316	0.133539	0.0114631
DIAPH1	Cytosol	Unclassified	0.00457495	0.00525228	0.988231	0.00194223	0.00135504	0.00100363	0.000936349	0.00127994	0.00131999	0.00122377	0.00134602	0.00136249	0.258129	0.012596	0.625568	0.0805985	0.0113393	0.000797822	0.00114441
DIAPH2	Cytosol	Unclassified	0.00456787	0.00529026	0.988191	0.00195085	0.00135814	0.000989774	0.000929529	0.00129042	0.00133883	0.00122182	0.00134796	0.00138165	0.190054	0.0117168	0.672773	0.101607	0.0120404	0.000791444	0.00115941
DIAPH3	Cytosol	C1	0.00691148	0.0076105	0.982307	0.0031713	0.00199112	0.00146071	0.00148763	0.00197202	0.0019062	0.00178239	0.00211313	0.00180878	0.646538	0.0829053	0.211048	0.0334851	0.00832957	0.00110398	0.00206732
DICER1	Nuclear	N1	0.0728796	0.864797	0.0562427	0.0060804	0.0486237	0.00646193	0.00777868	0.0100153	0.84572	0.00559181	0.00916337	0.00432254	0.0375455	0.00500592	0.00384446	0.0037705	0.00607636	0.00269865	0.00338175
DIDO1	Nuclear	N4	0.00645353	0.983055	0.00835421	0.00213755	0.00169656	0.00129098	0.00139832	0.00206766	0.00871569	0.0446298	0.00305273	0.926657	0.00150917	0.00181532	0.00121775	0.0012887	0.00252327	0.000942469	0.00119508
DIEXF	Nuclear	N4	0.00674637	0.978516	0.0125363	0.00220127	0.00220009	0.00155714	0.00128058	0.00170857	0.00195412	0.00273098	0.00237293	0.971458	0.00171239	0.00502188	0.00123076	0.00150639	0.00306486	0.000923372	0.00127789
DIMT1	Nuclear	N1	0.0123381	0.980571	0.00496806	0.00212307	0.00601543	0.00224465	0.00214915	0.00192883	0.95721	0.00313753	0.0189223	0.00130069	0.000999989	0.000923689	0.000946709	0.000984174	0.0011135	0.00105433	0.00106873
[truncated: 8,236 more rows]

## Sheet: HiRIEF 3-10 
Protein	Neighborhood Class	Compartment Class	Secretory	Nuclear	Cytosol	Mitochondria	S1	S2	S3	S4	N1	N2	N3	N4	C1	C2	C3	C4	C5	M1	M2
[truncated: 9,089 more rows]

[truncated: 4 more sheets: HiRIEF 3.4-4.8 , High pH, Long gradient, Legend]
